# Supplementary material for: Alveolar Macrophage Chromatin Is Modified to Orchestrate Host Response to Mycobacterium bovis Infection
Source: PubMed Central journal article supplement (PMC7020904; doi:10.3389/fgene.2019.01386), 2020-02-07
Supplement: DataSheet_1.pdf [file DataSheet_1.pdf]

**Alveolar macrophage chromatin is uniquely modified to orchestrate host response to *Mycobacterium bovis* infection**

Thomas Jonathan Hall, Douglas Vernimmen, John Andrew Browne, Michael P. Mullen, Stephen Vincent Gordon, David Evan MacHugh and Alan Mark O'Doherty

**Supplementary Figures**

**Supplementary Figure 1 (following 3 pages): Genome wide signal intensity correlation histograms of raw ChIP-seq reads.**

2D-histograms of the global levels of (A) H3K4me3, (B) Pol II and (C) H3K27me3. Reads from each animal and each condition are correlated based on read position and alignment. Plots and values were obtained using the 'Correlate' tool of easeq bioinformatics tool with the window size set to 1000 bp and max values on axes as 200 counts.  $r$  values are genome-wide Pearson's correlation coefficients for the datasets.

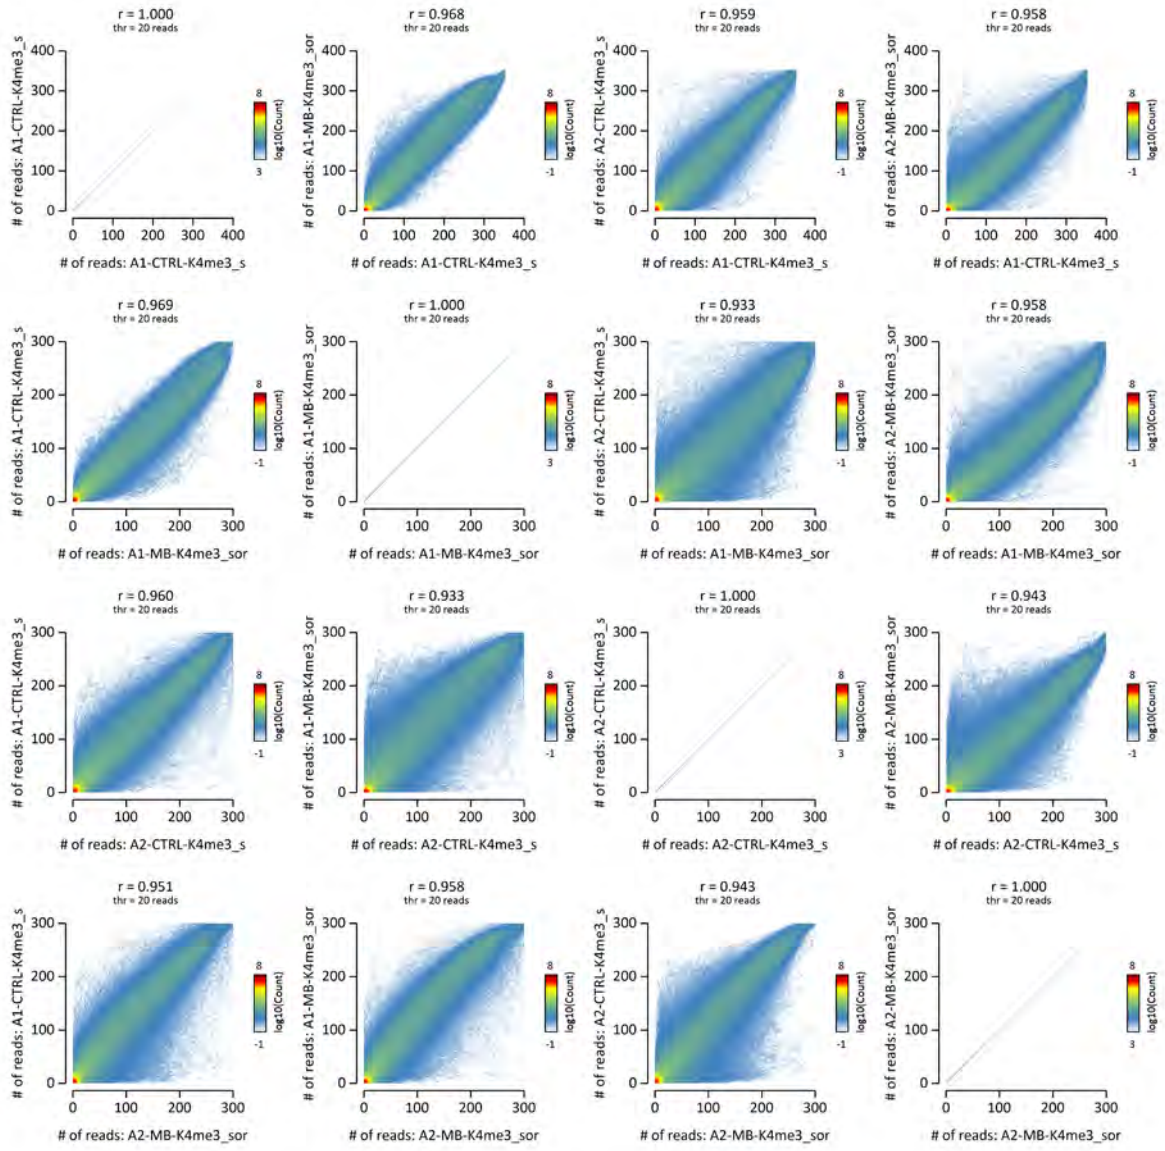

A

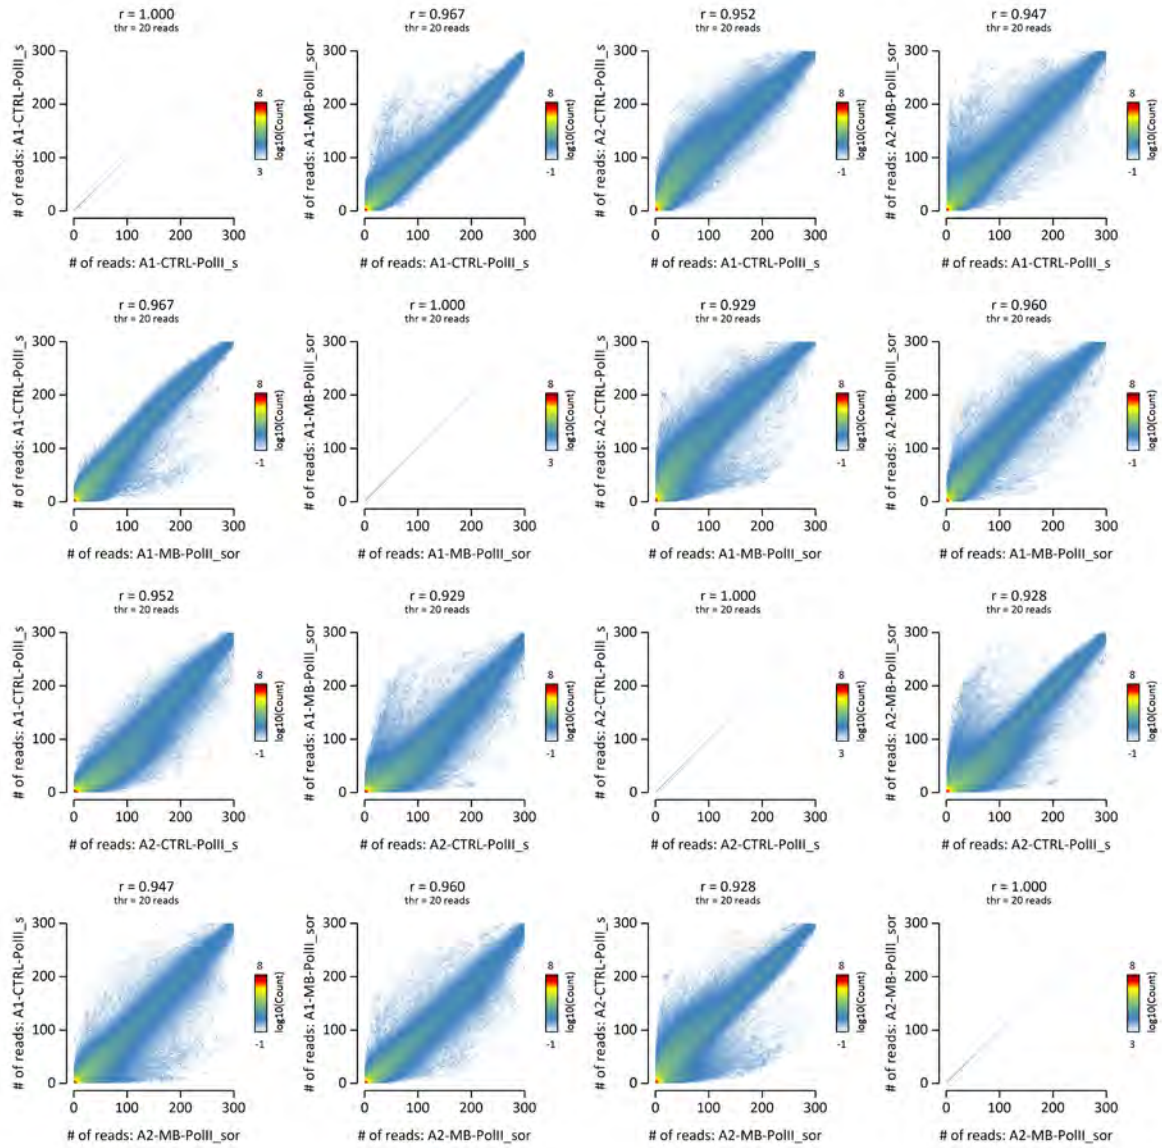

B

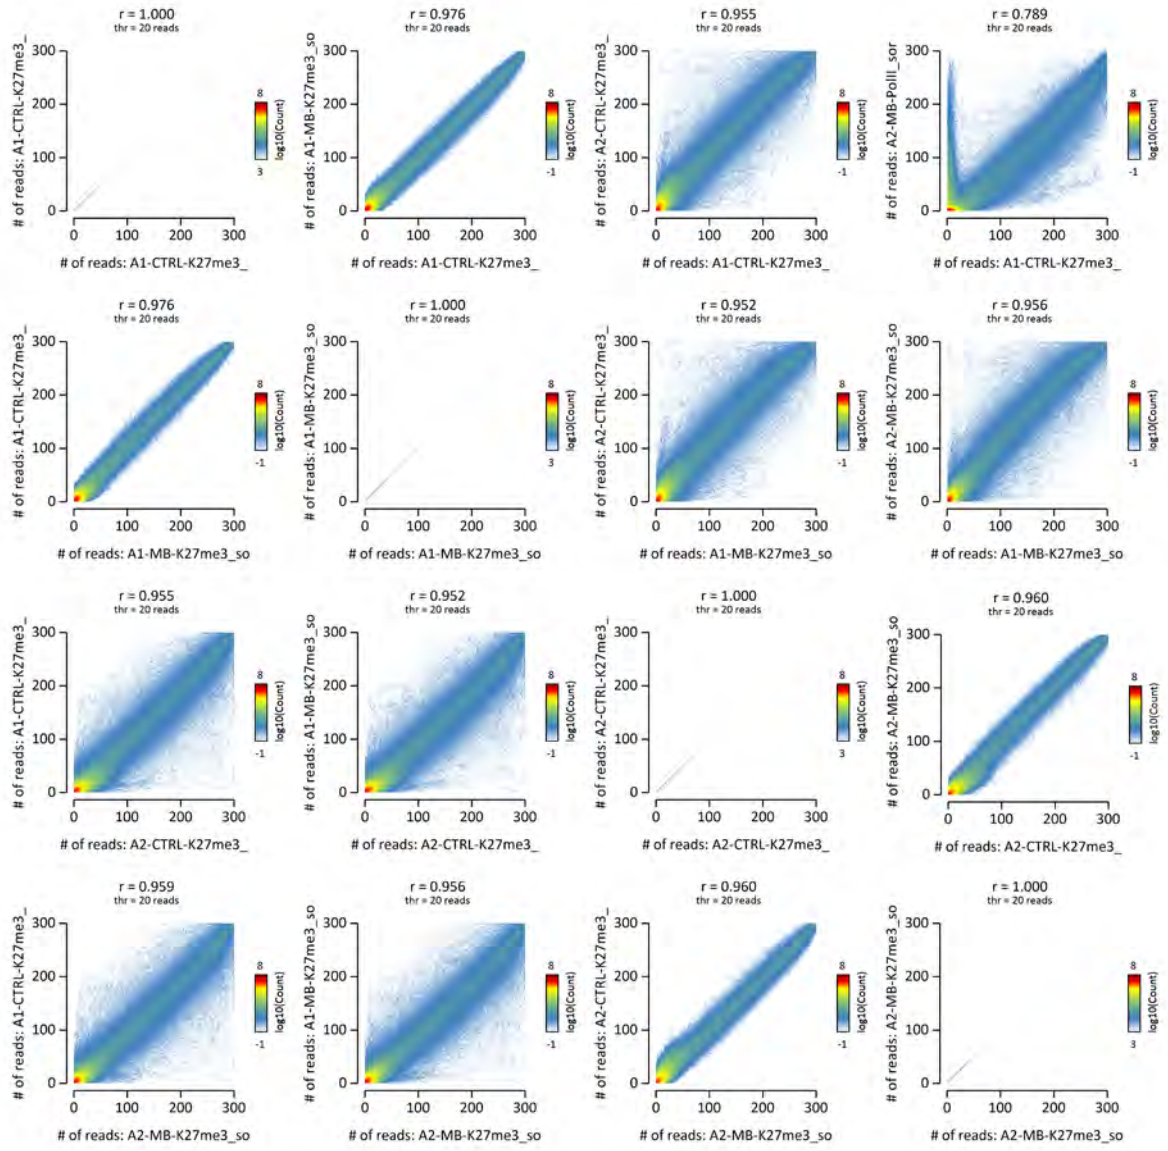

C



**Supplementary Figure 2: Correlation heatmap of Pol II occupancy and overall H3K27me3 peak size.**

Correlation heatmap demonstrating the relative levels of Pol II and H3K27me3 peak density and size with a blue colour scale (white = no peak, dark blue = dense peak) at the TSS of a gene identified as having differential Pol II and H3K4me3 peaks (y axis). The plot indicates a negative correlation between the size of Pol II peaks and the size of H3K27me3 peaks.

**Supplementary Figure 3 (following 3 pages): Principle component analysis of differential ChIP-seq peaks between conditions.**

PCA plots of (A) H3K4me3, (B) Pol II and (C) H3K27me3 ChIP-seq peak differences between control and infected samples generated by R tool DiffBind. H3K4me3 and Pol II peaks cluster strongly by condition.



A

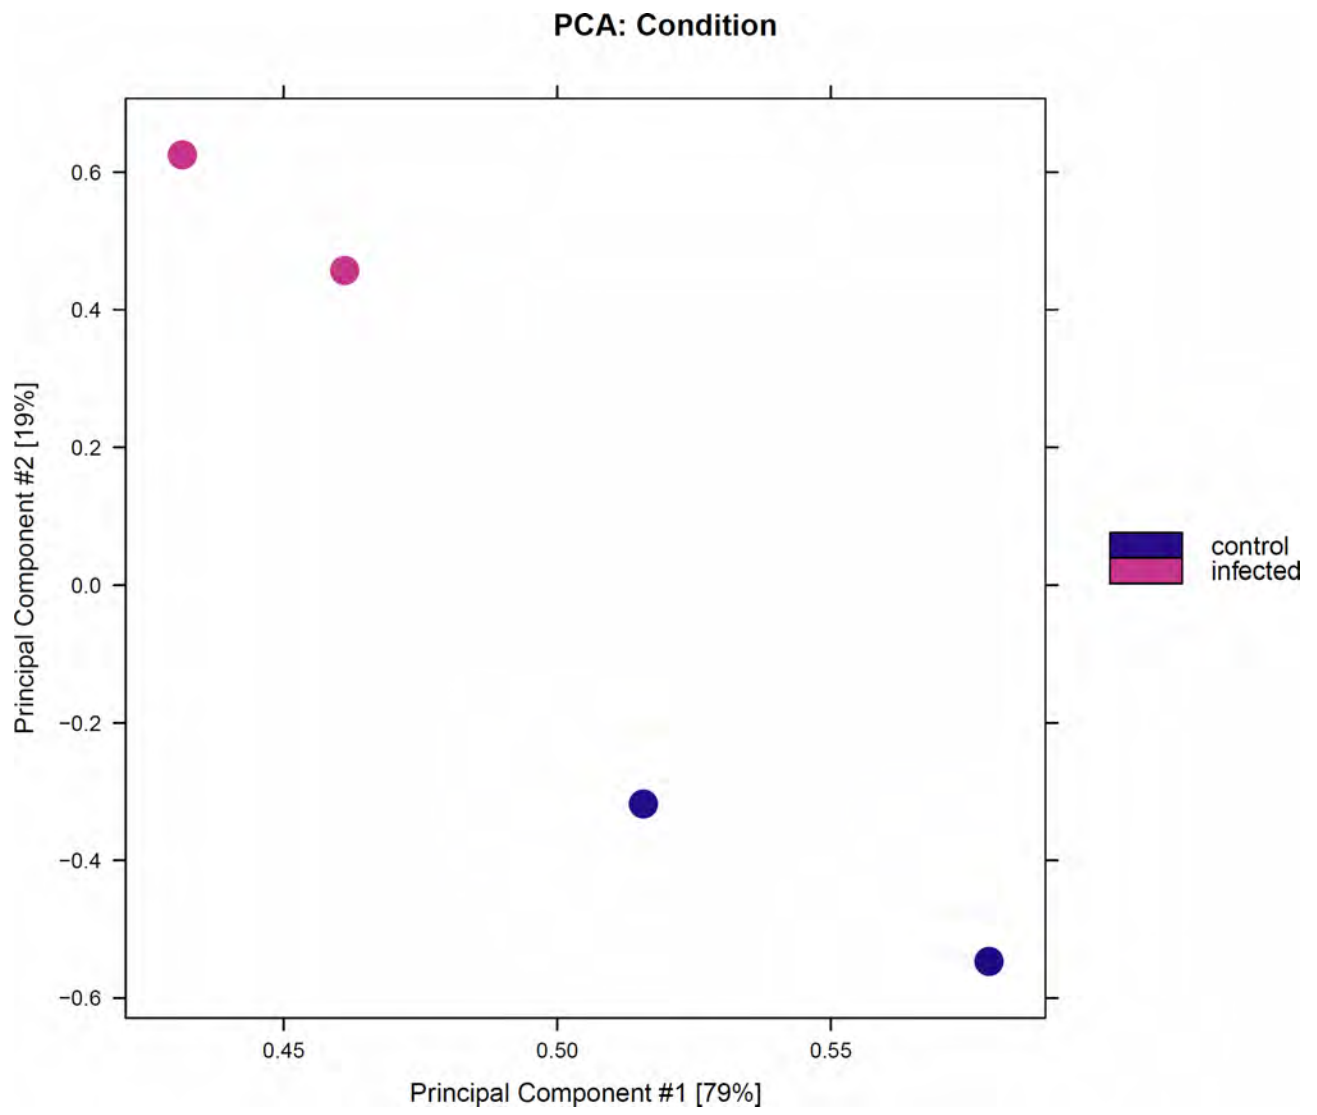

**B**

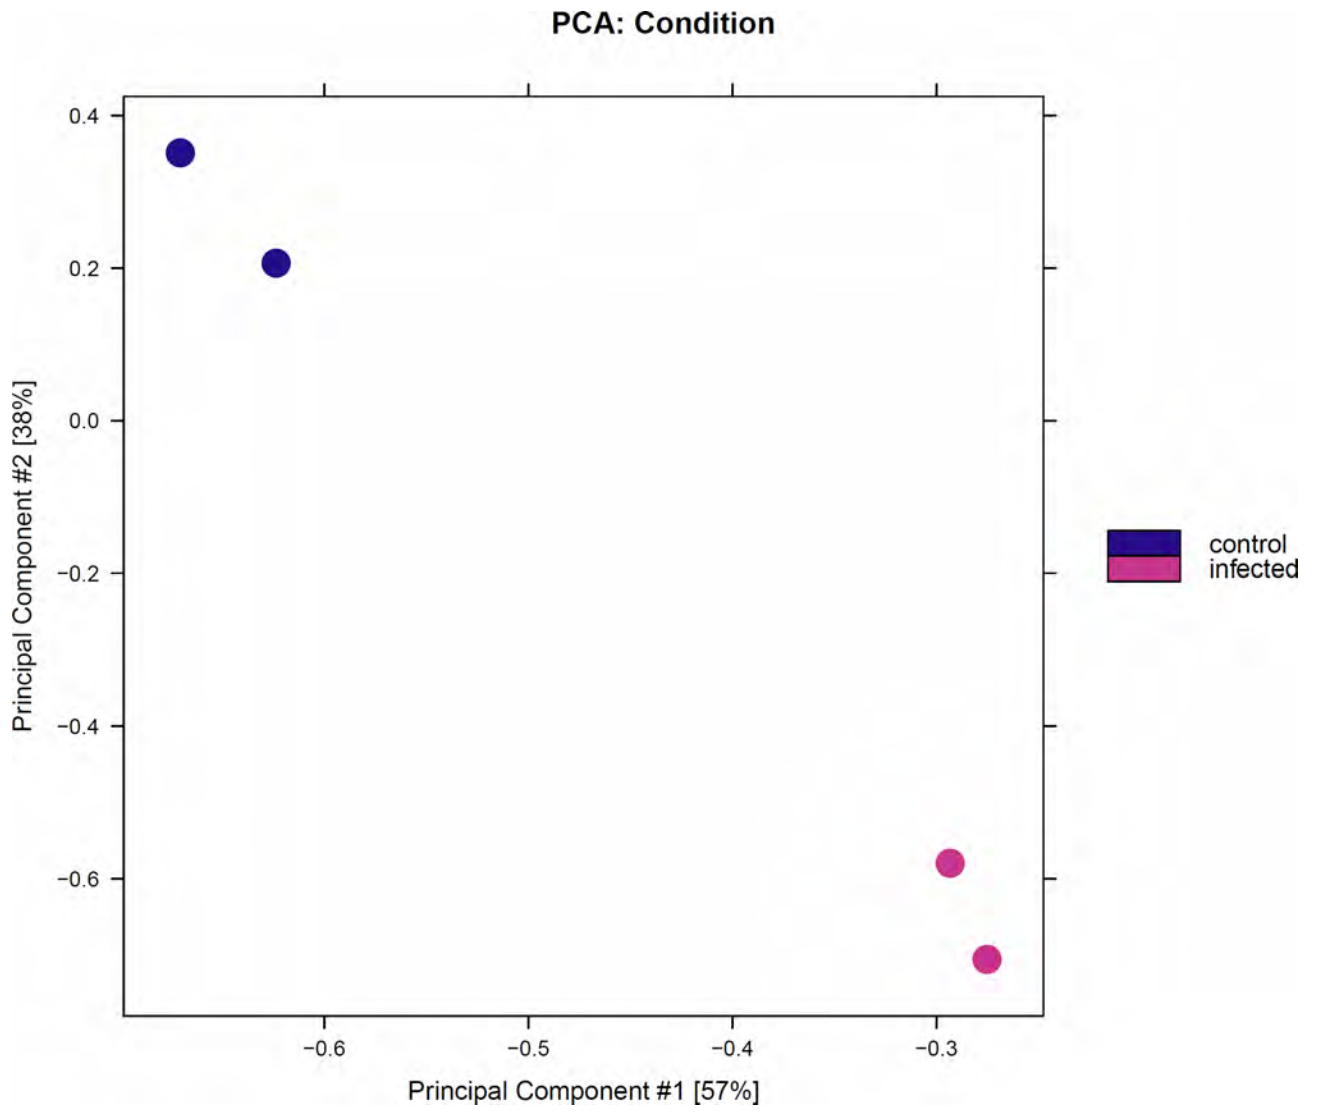

C

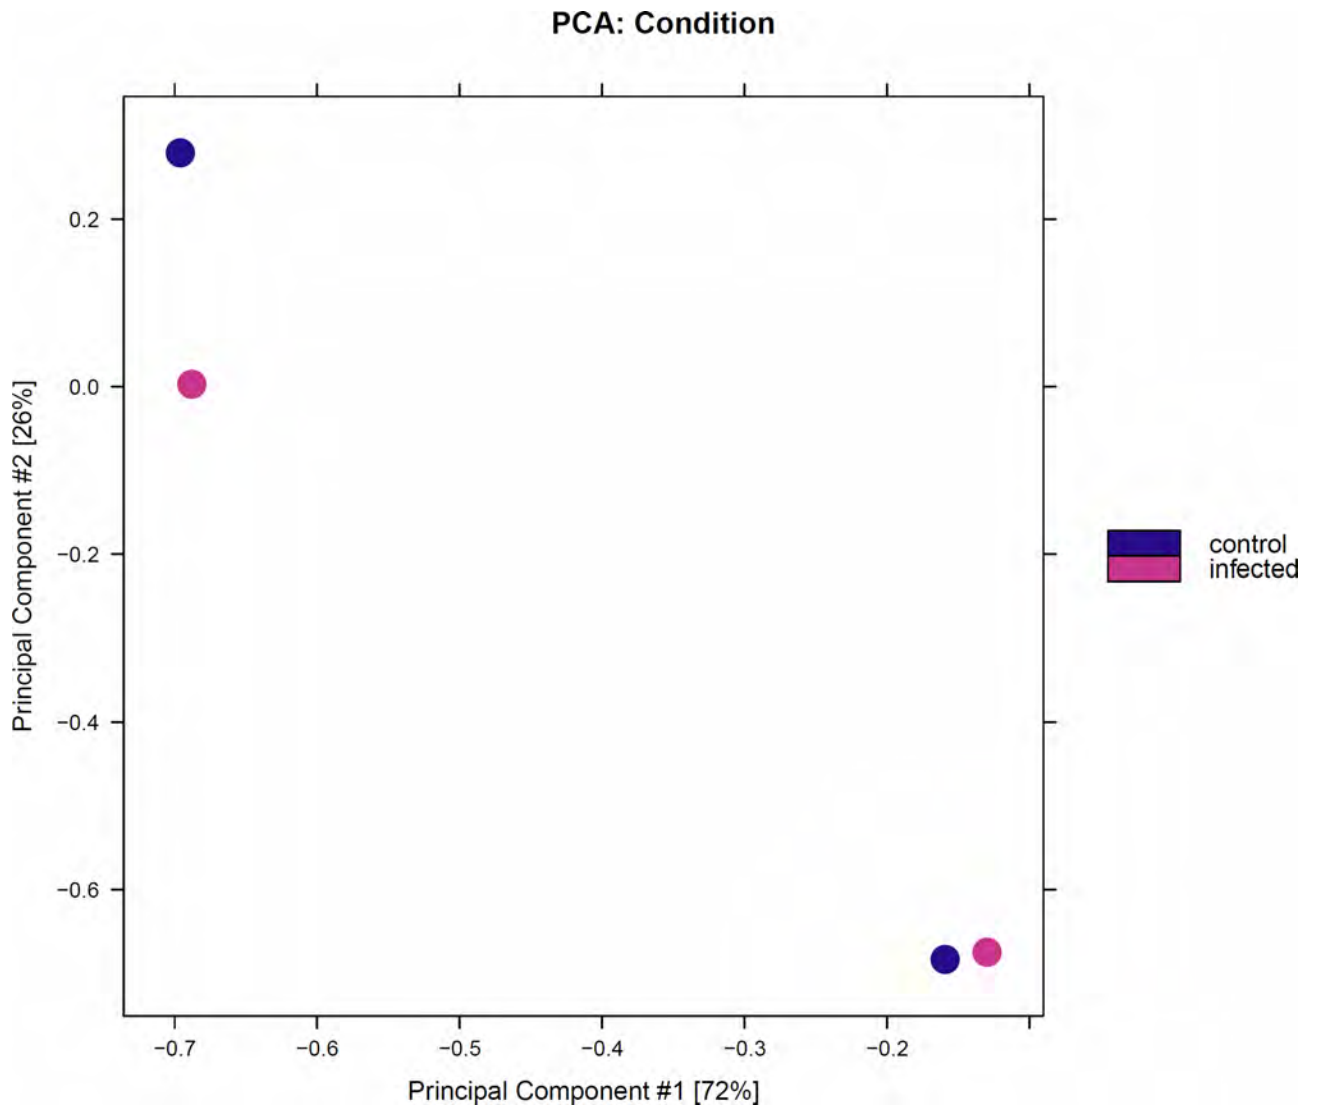

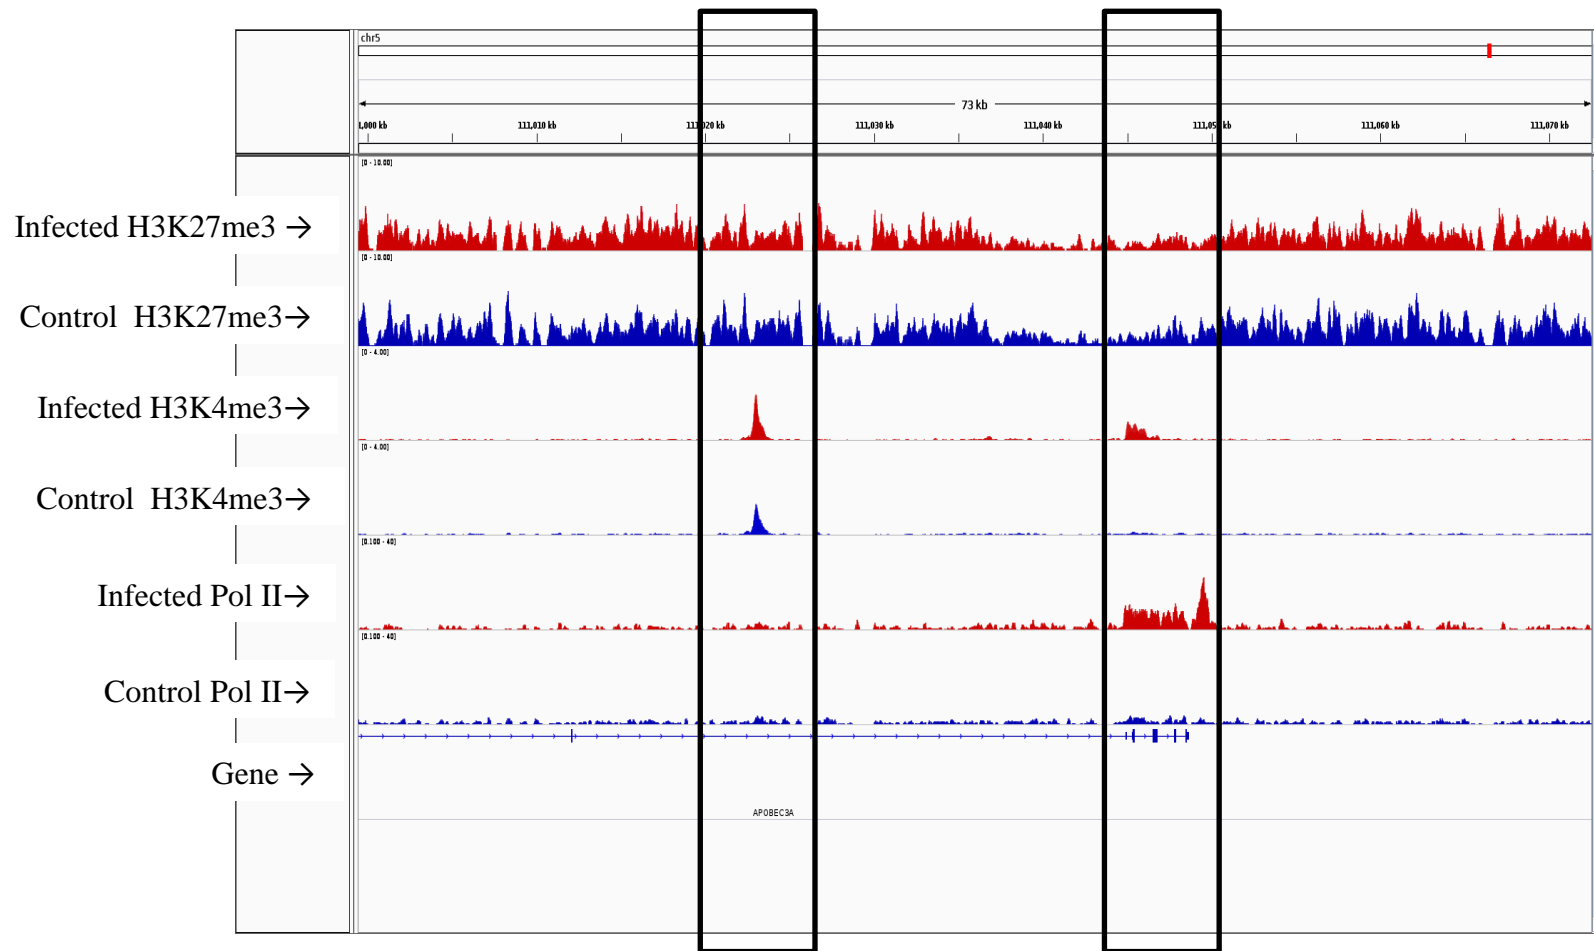

**Supplementary figure 4 (following 235 pages).** IGV plot showing CHIP-seq tracks. Black open boxes highlight loci that are differentially enriched for methylation at histone 3 lysine 4 (H3K4me3) and/or RNA polymerase II (Pol II) occupancy.

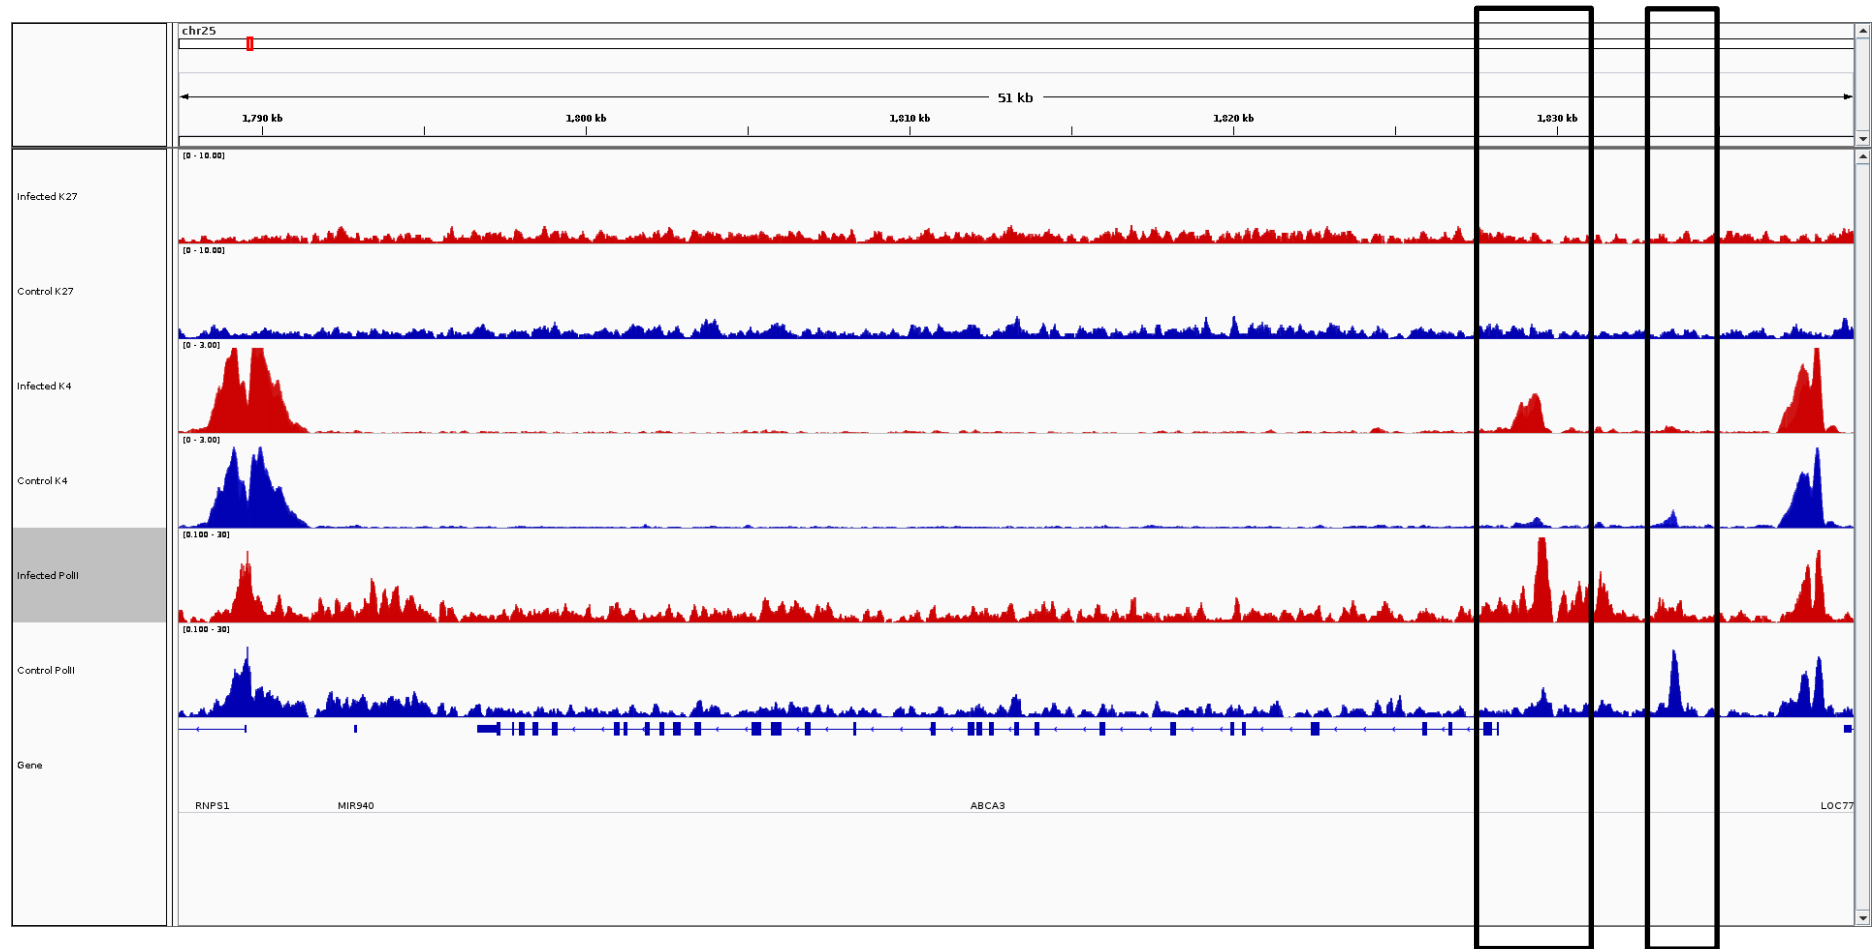

***ABCA3***

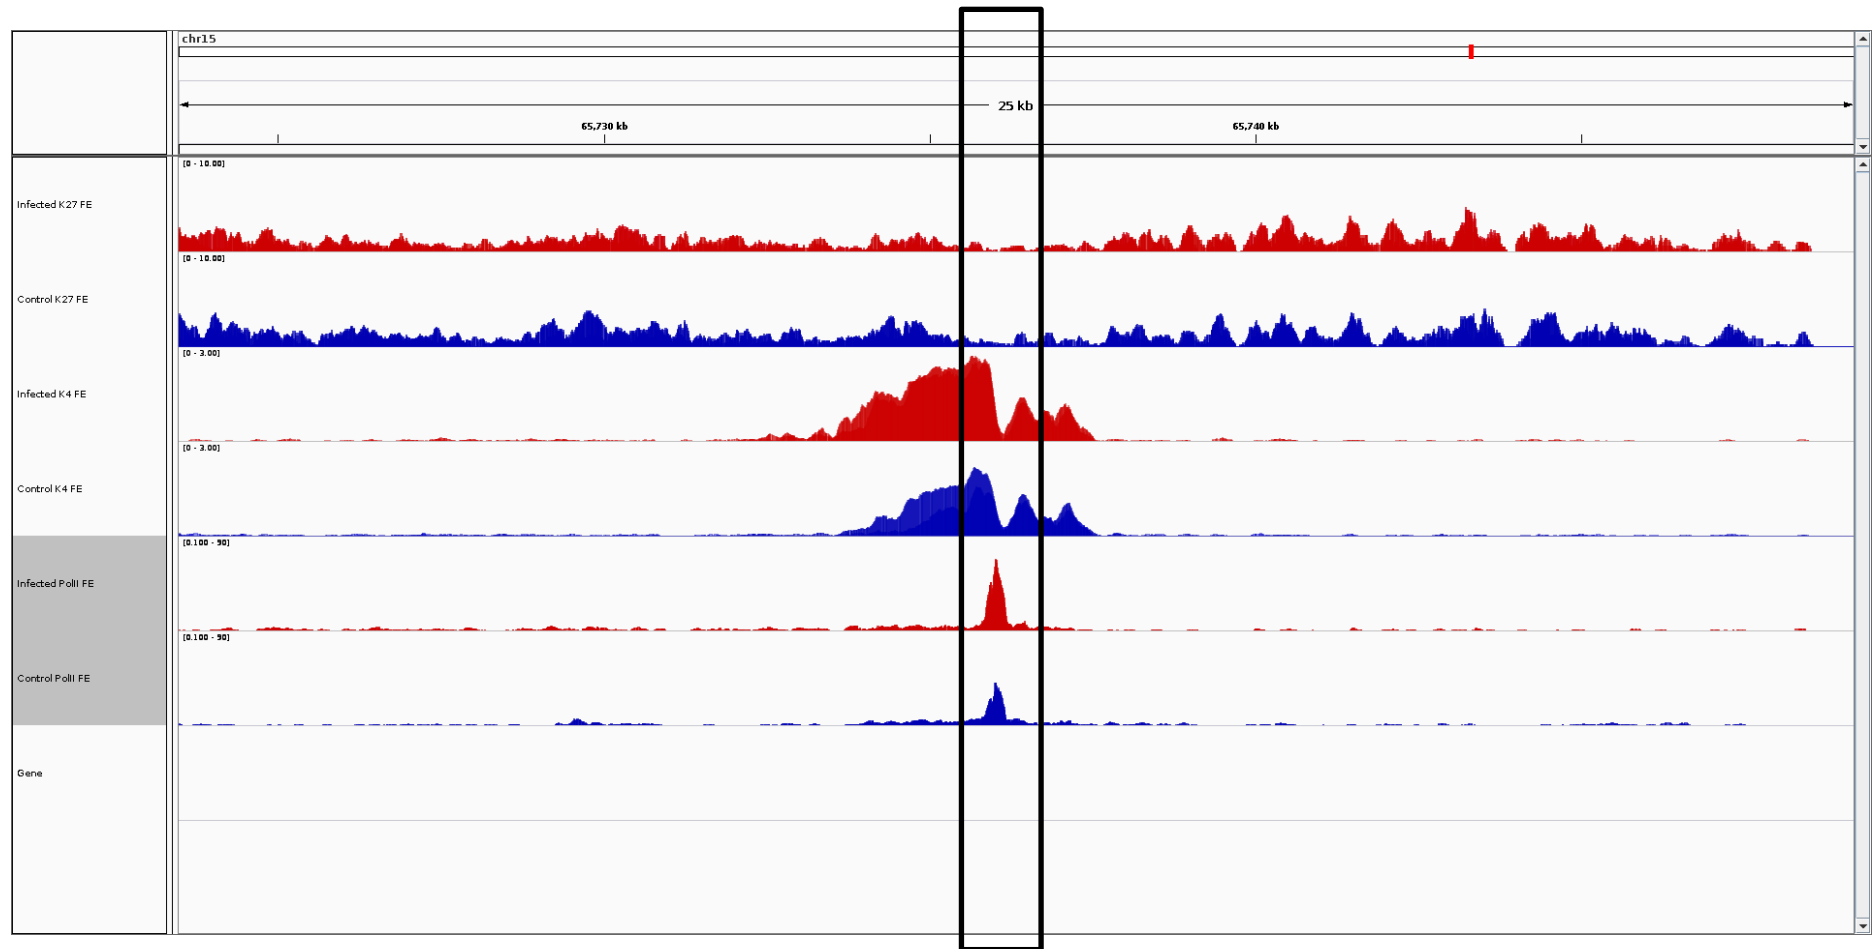

***ABTB2***

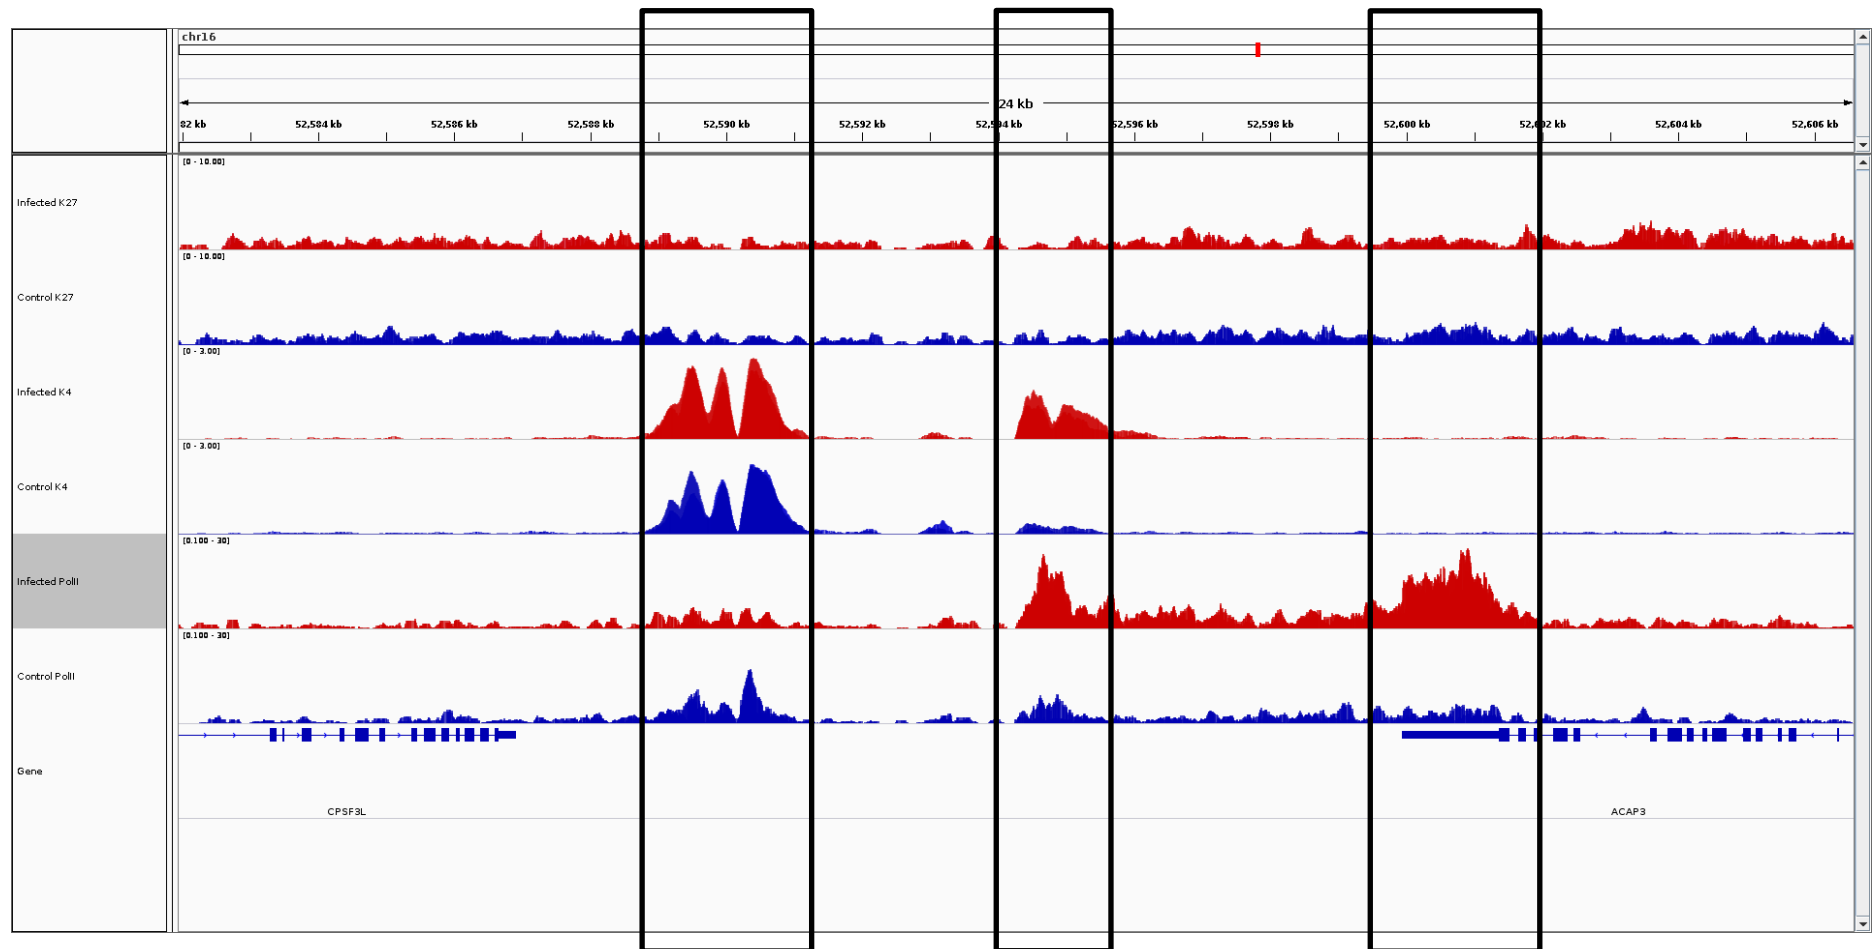

*ACAP3*

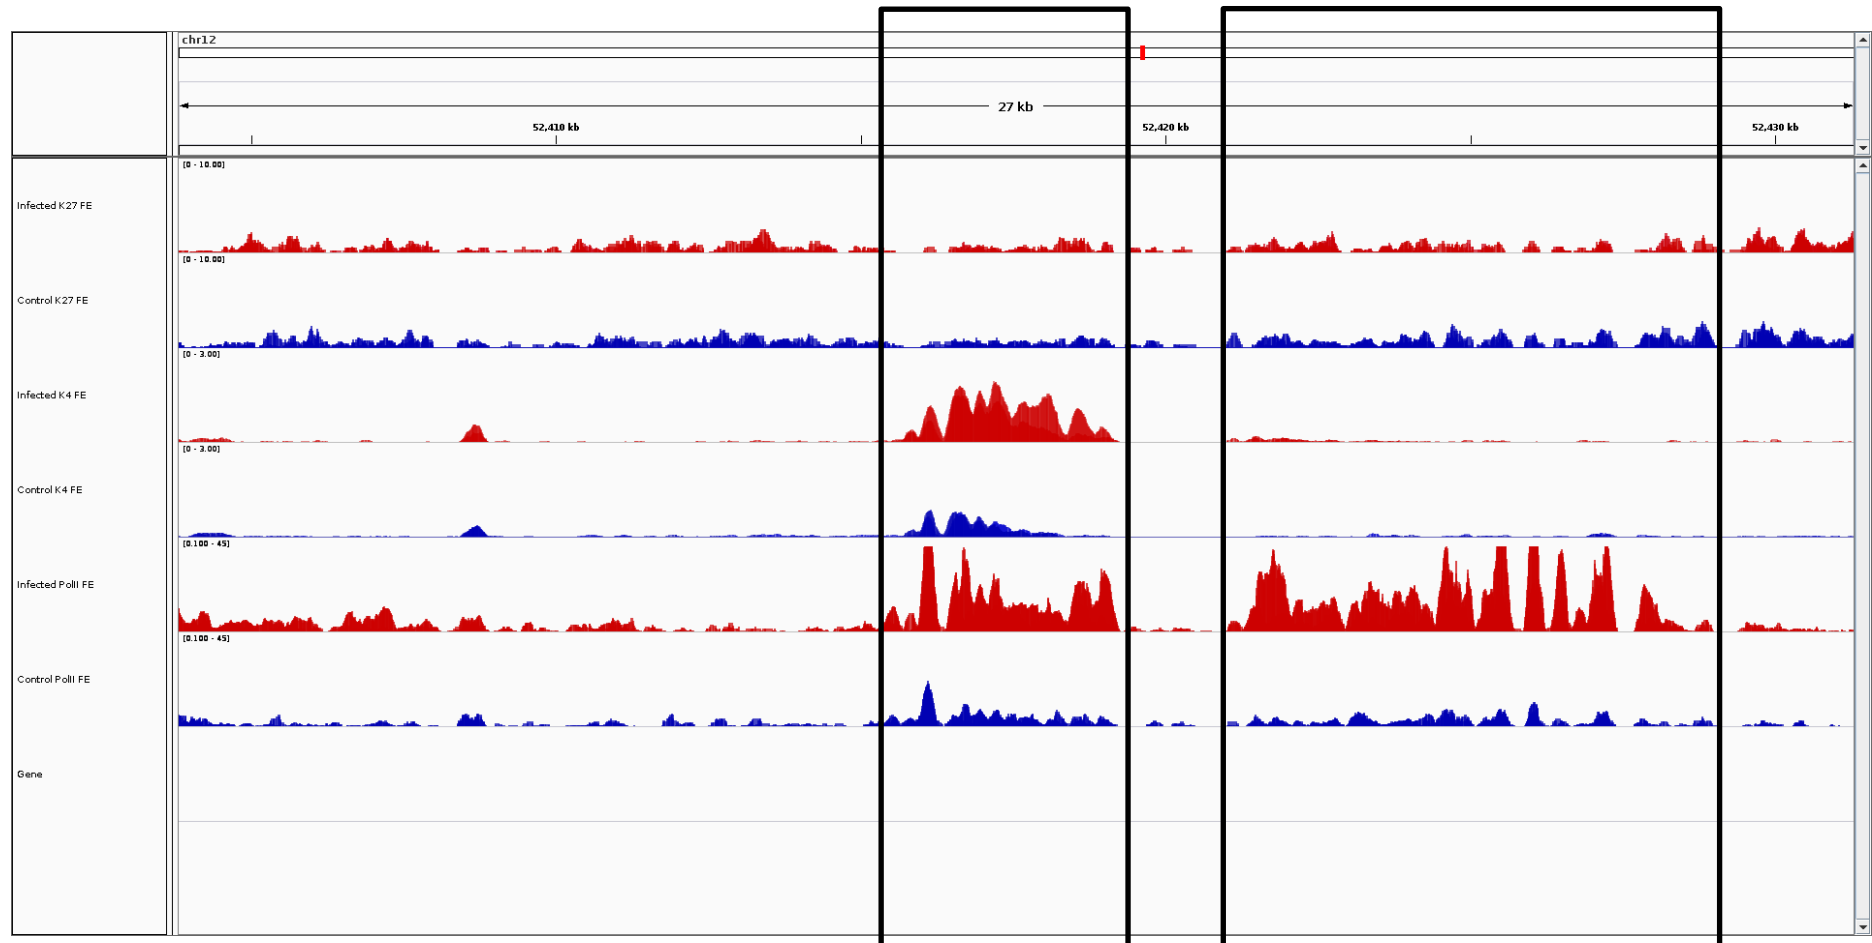

*ACOD1*



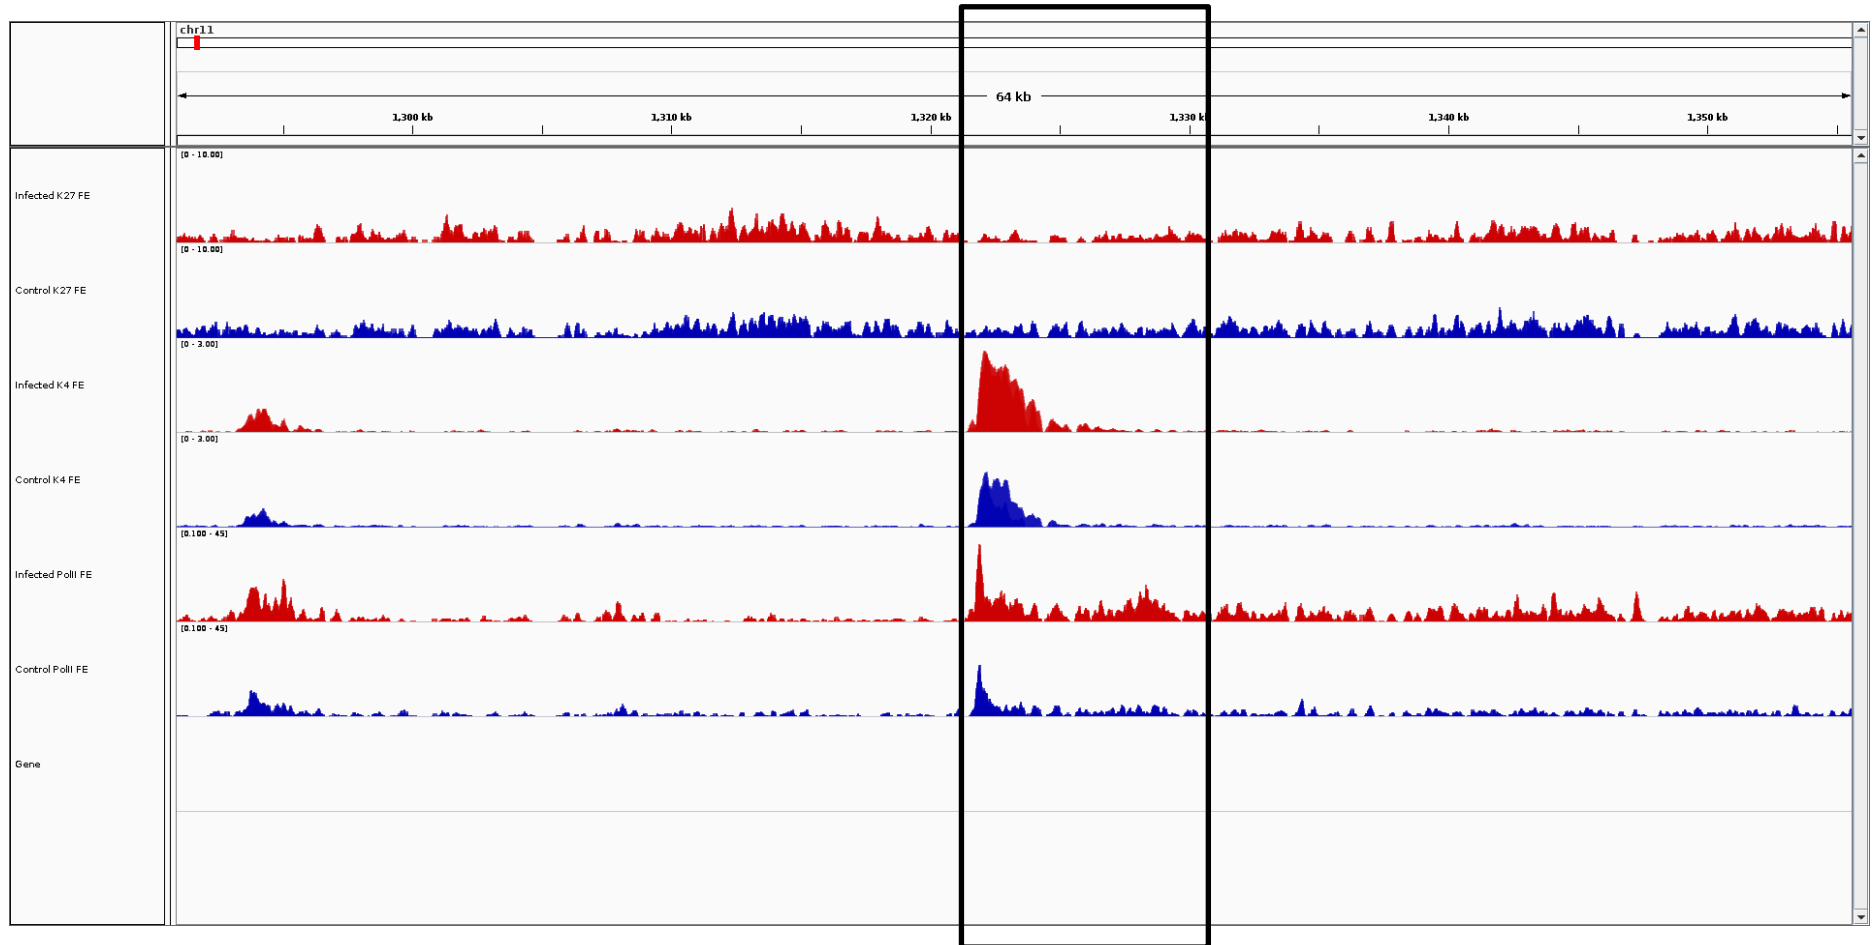

*ACOXL*

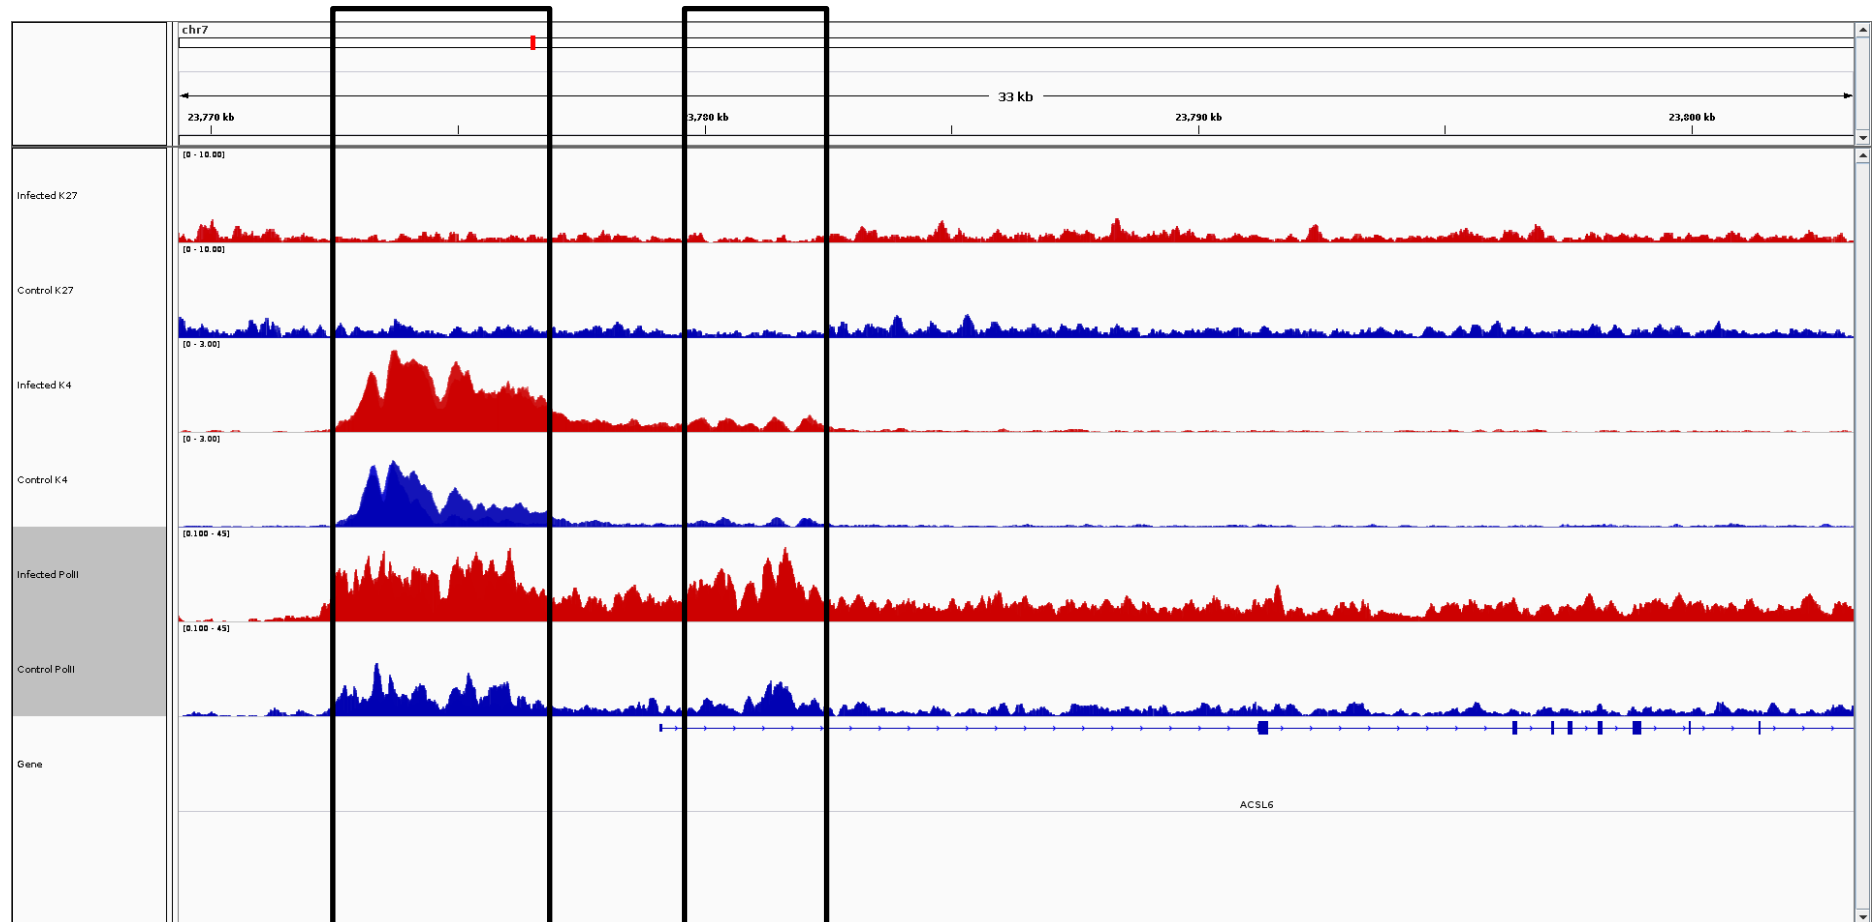

*ACSL6*

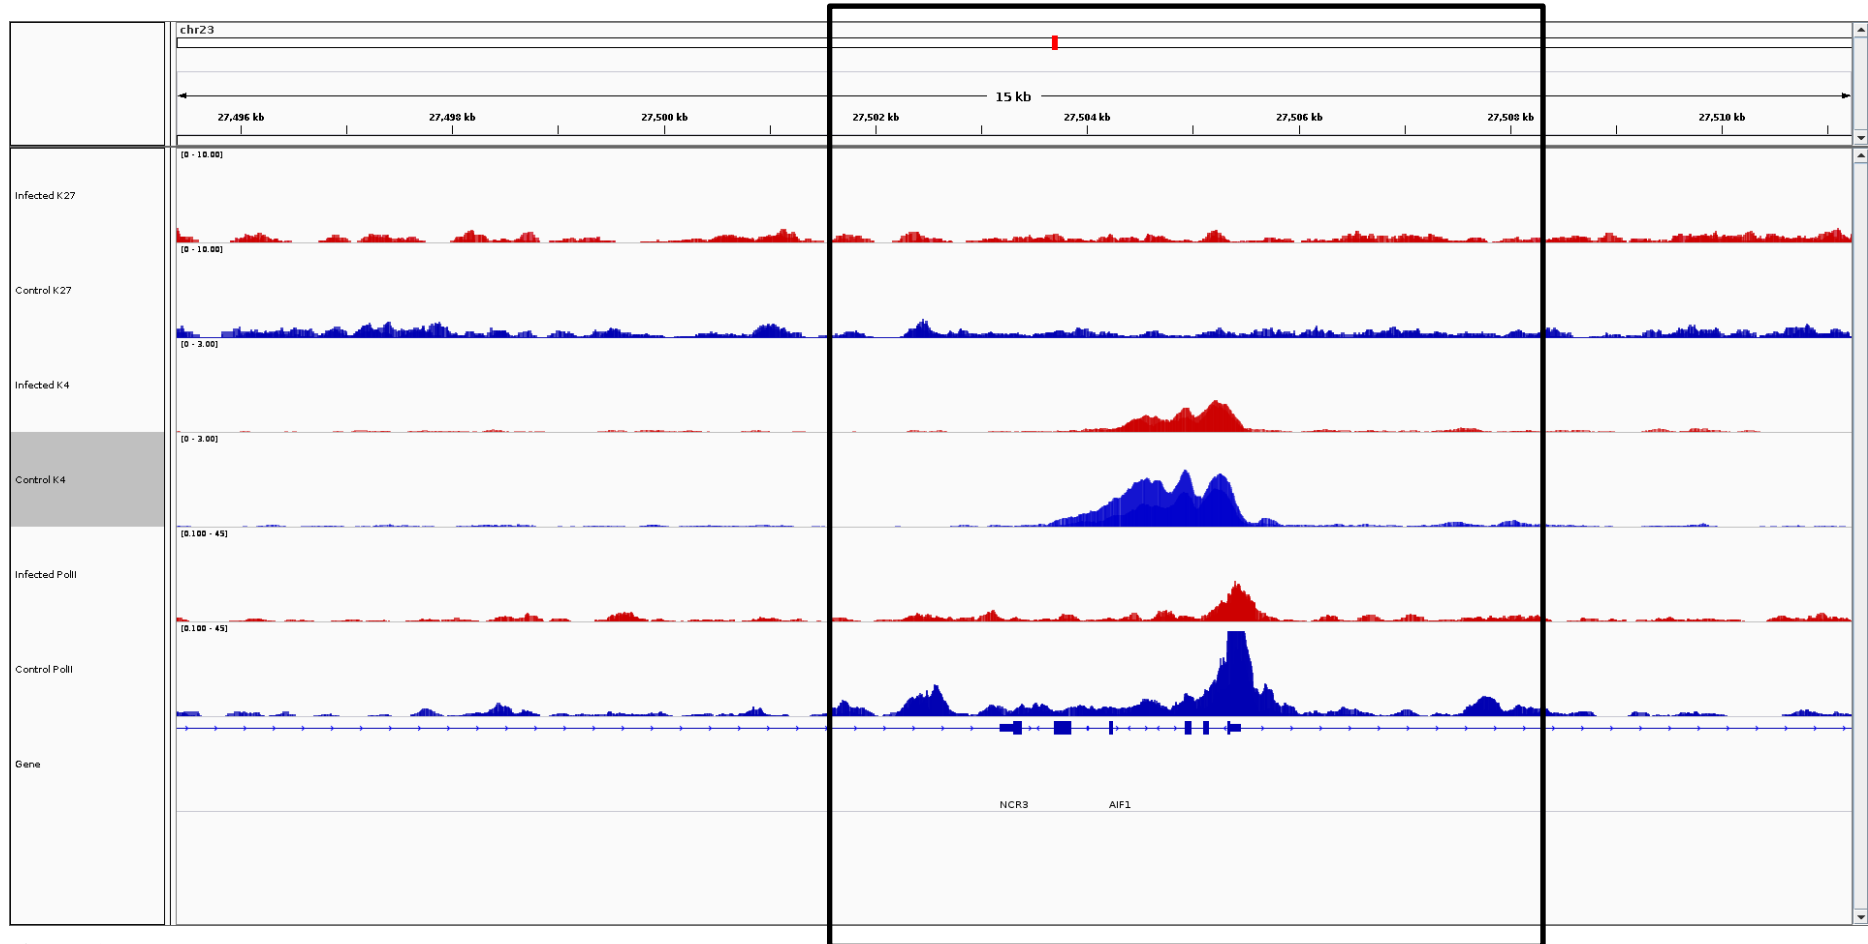

***AIF1***

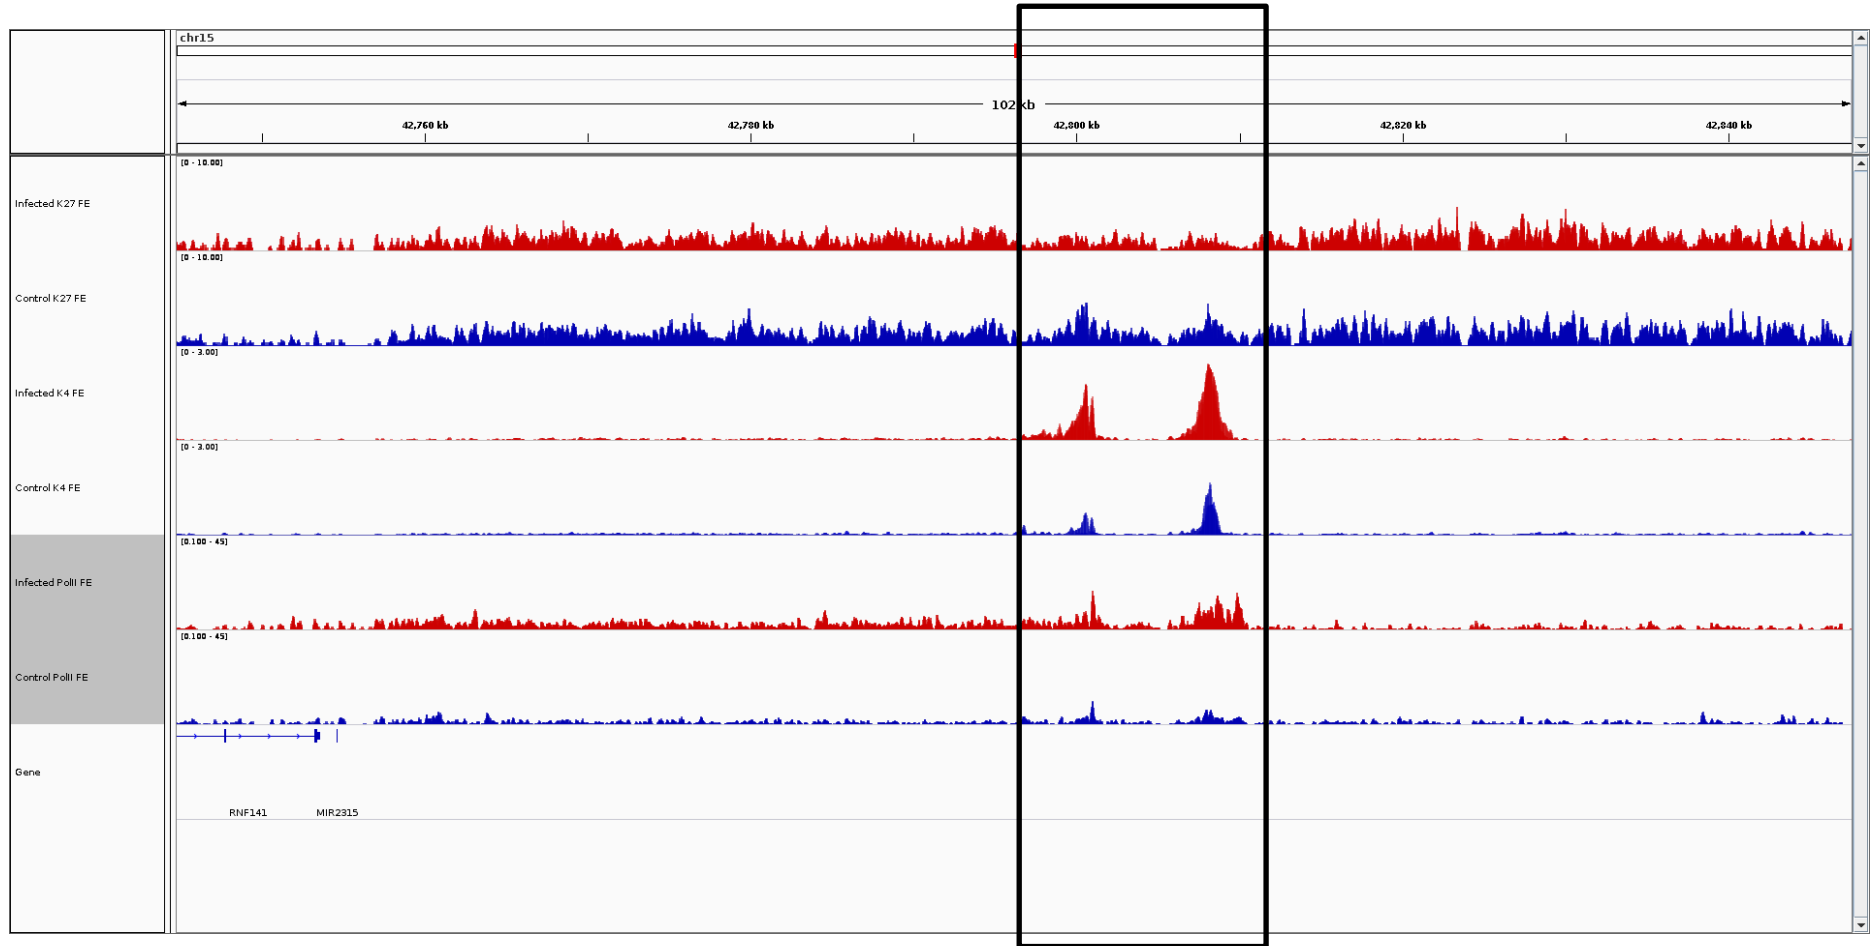

***AMPD1***

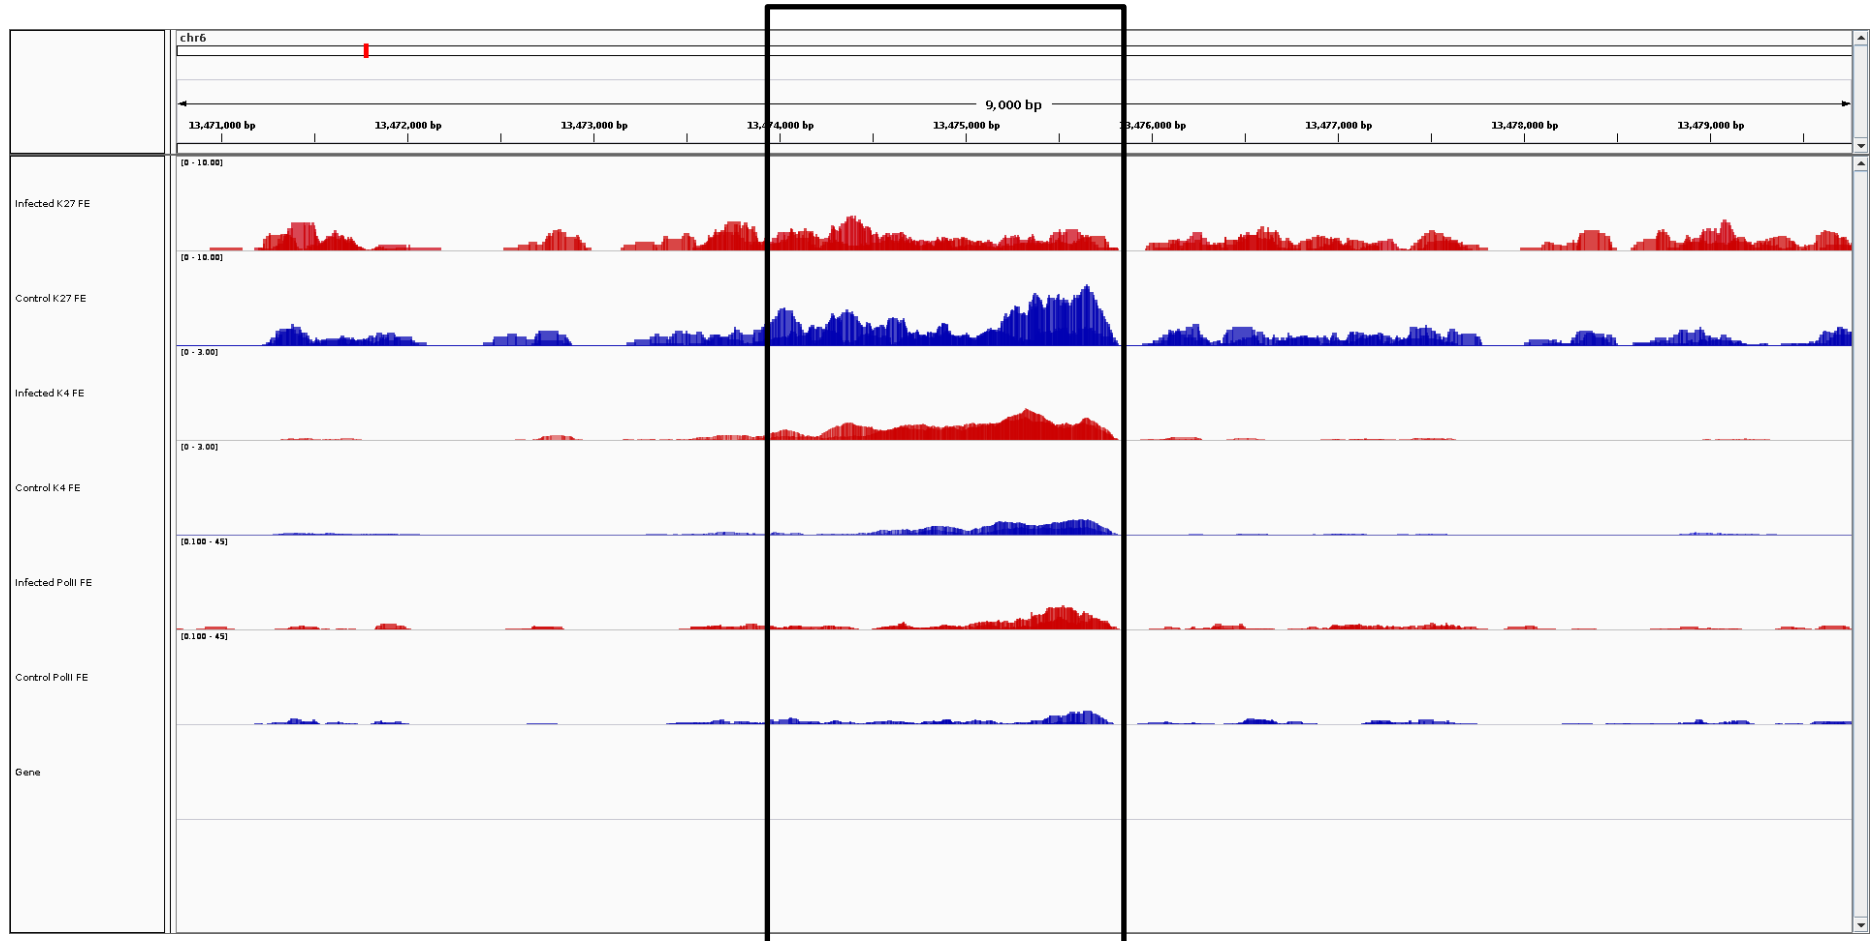

***ANK2***

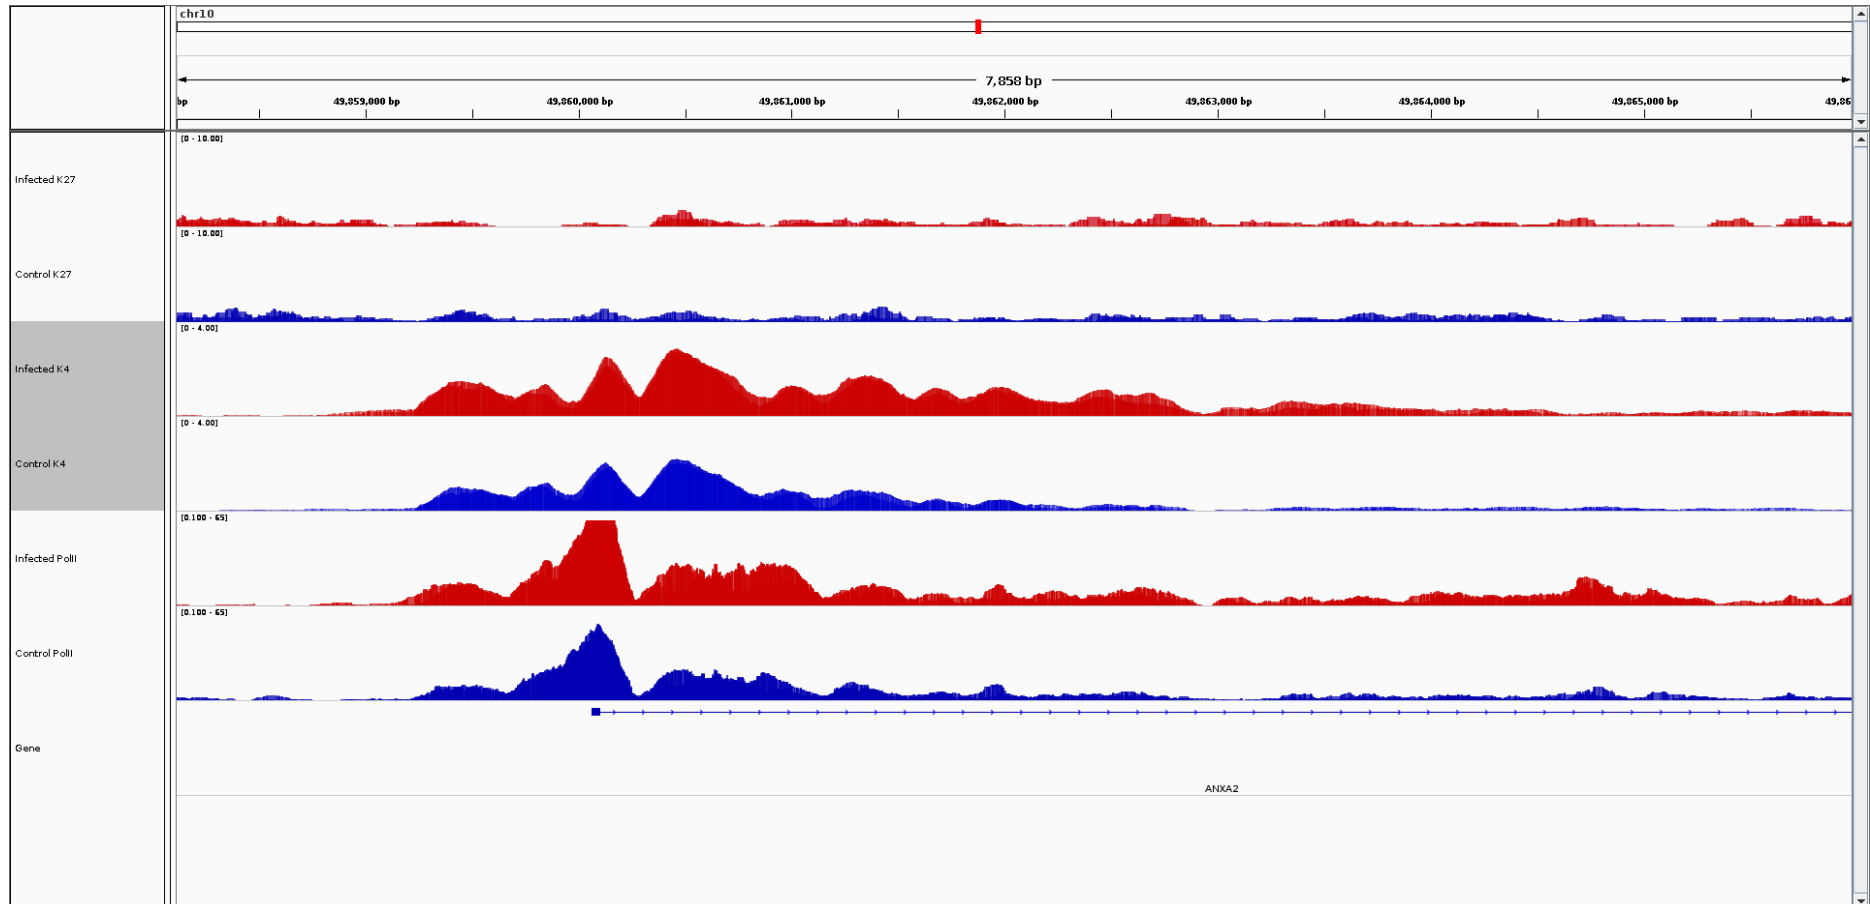

**ANXA2**

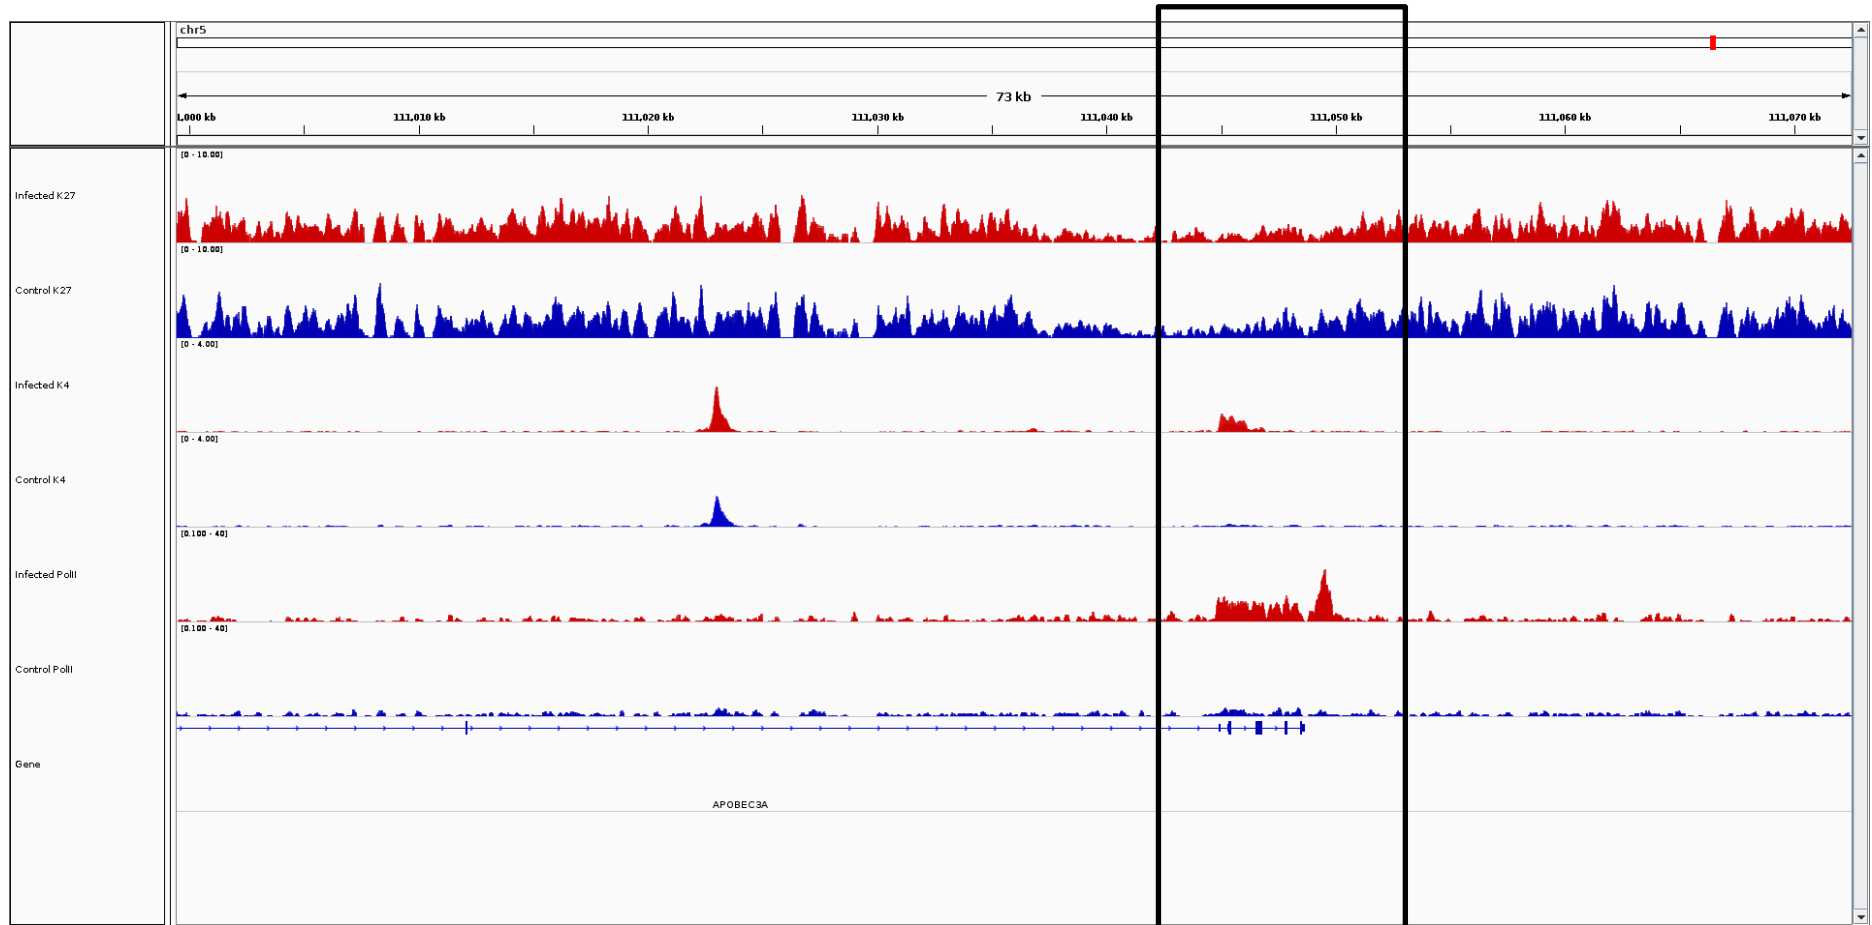

***APOBEC3A***

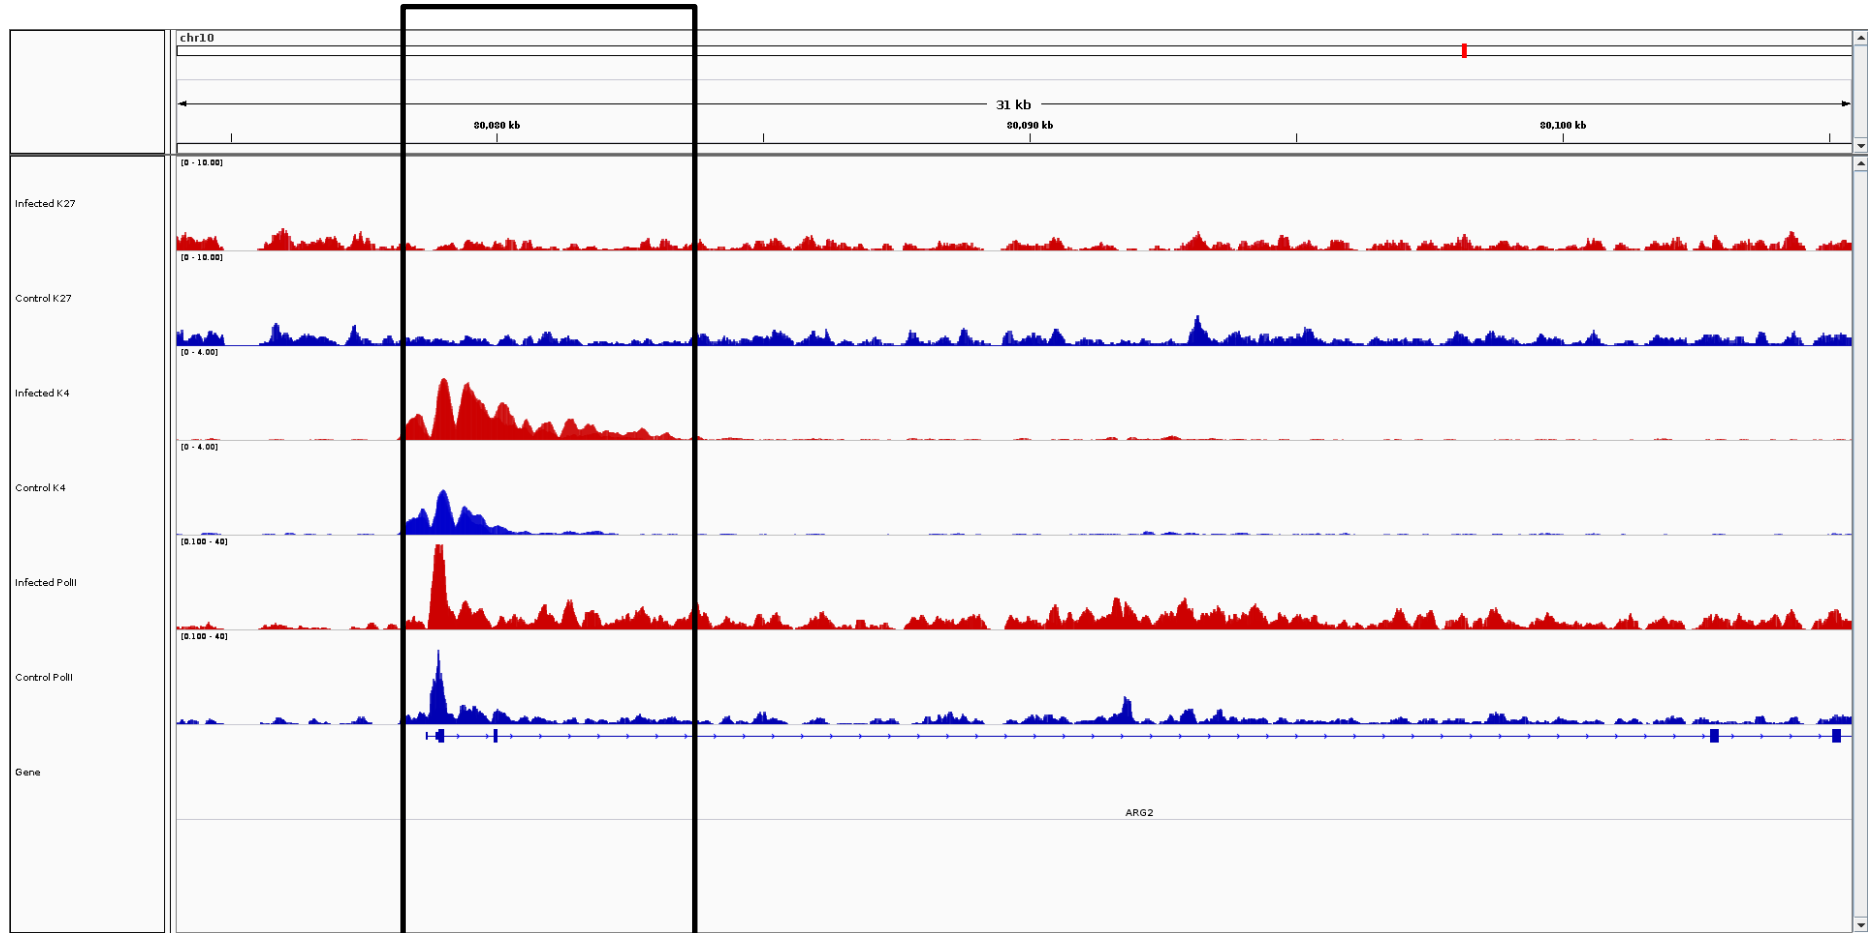

**ARG2**



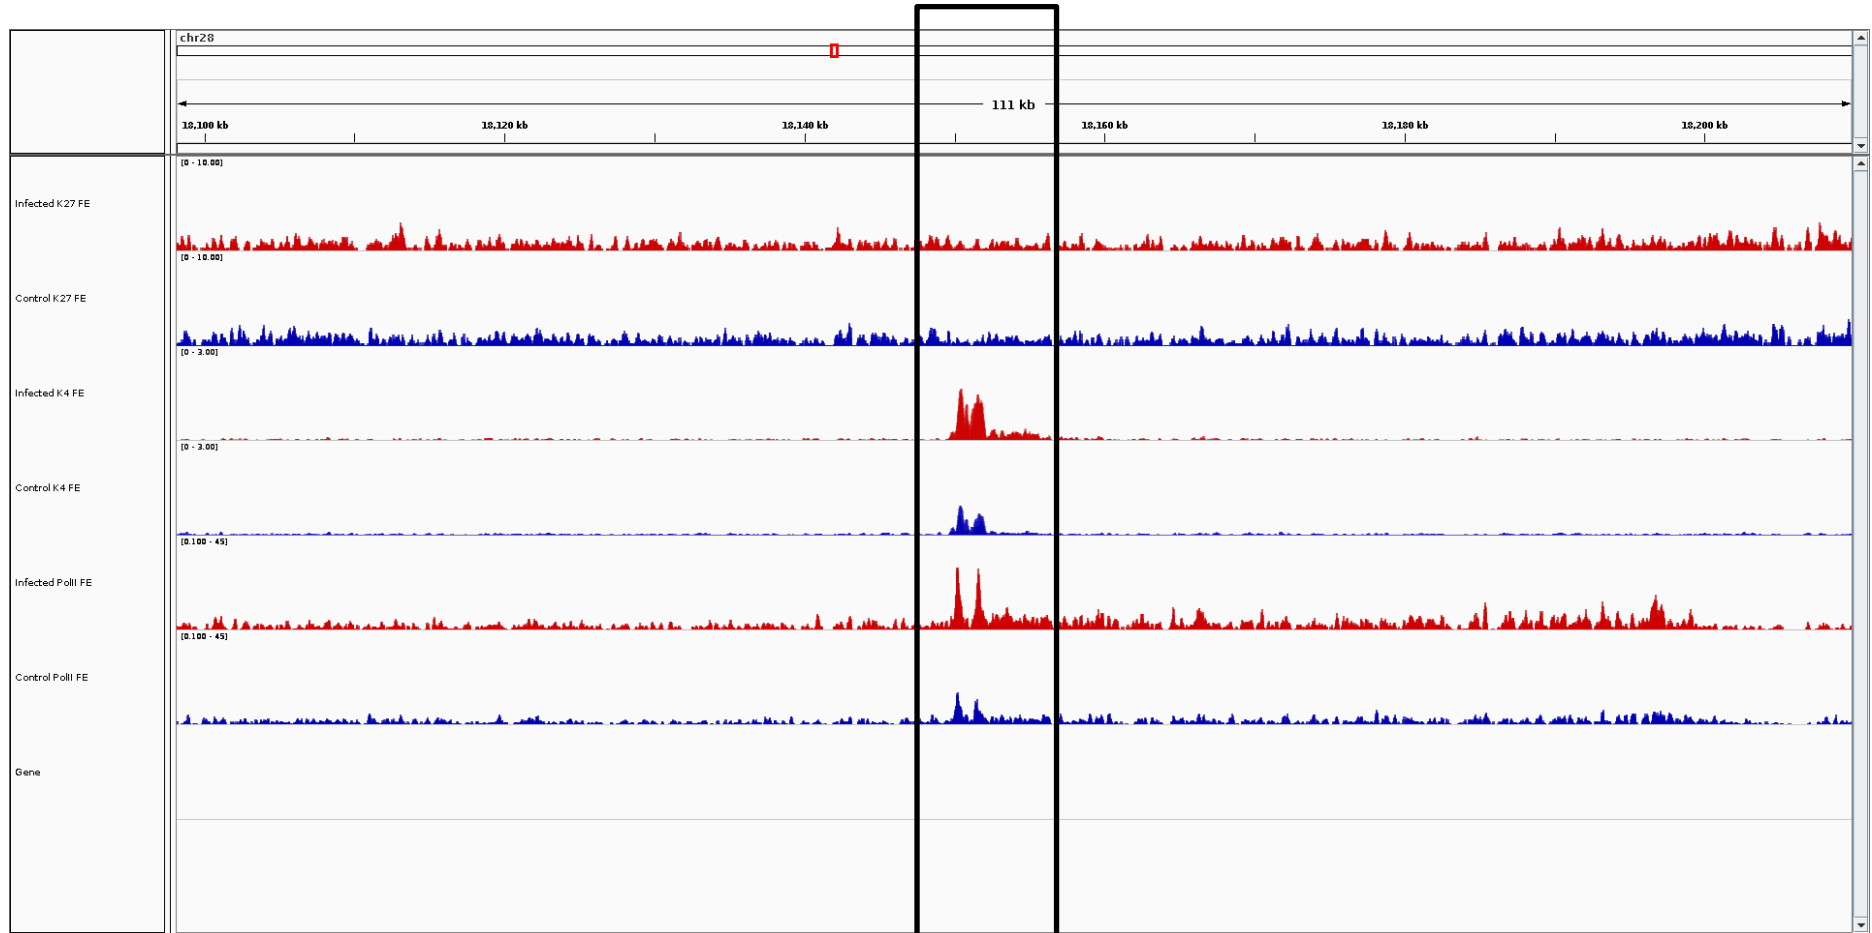

***ARID5B***

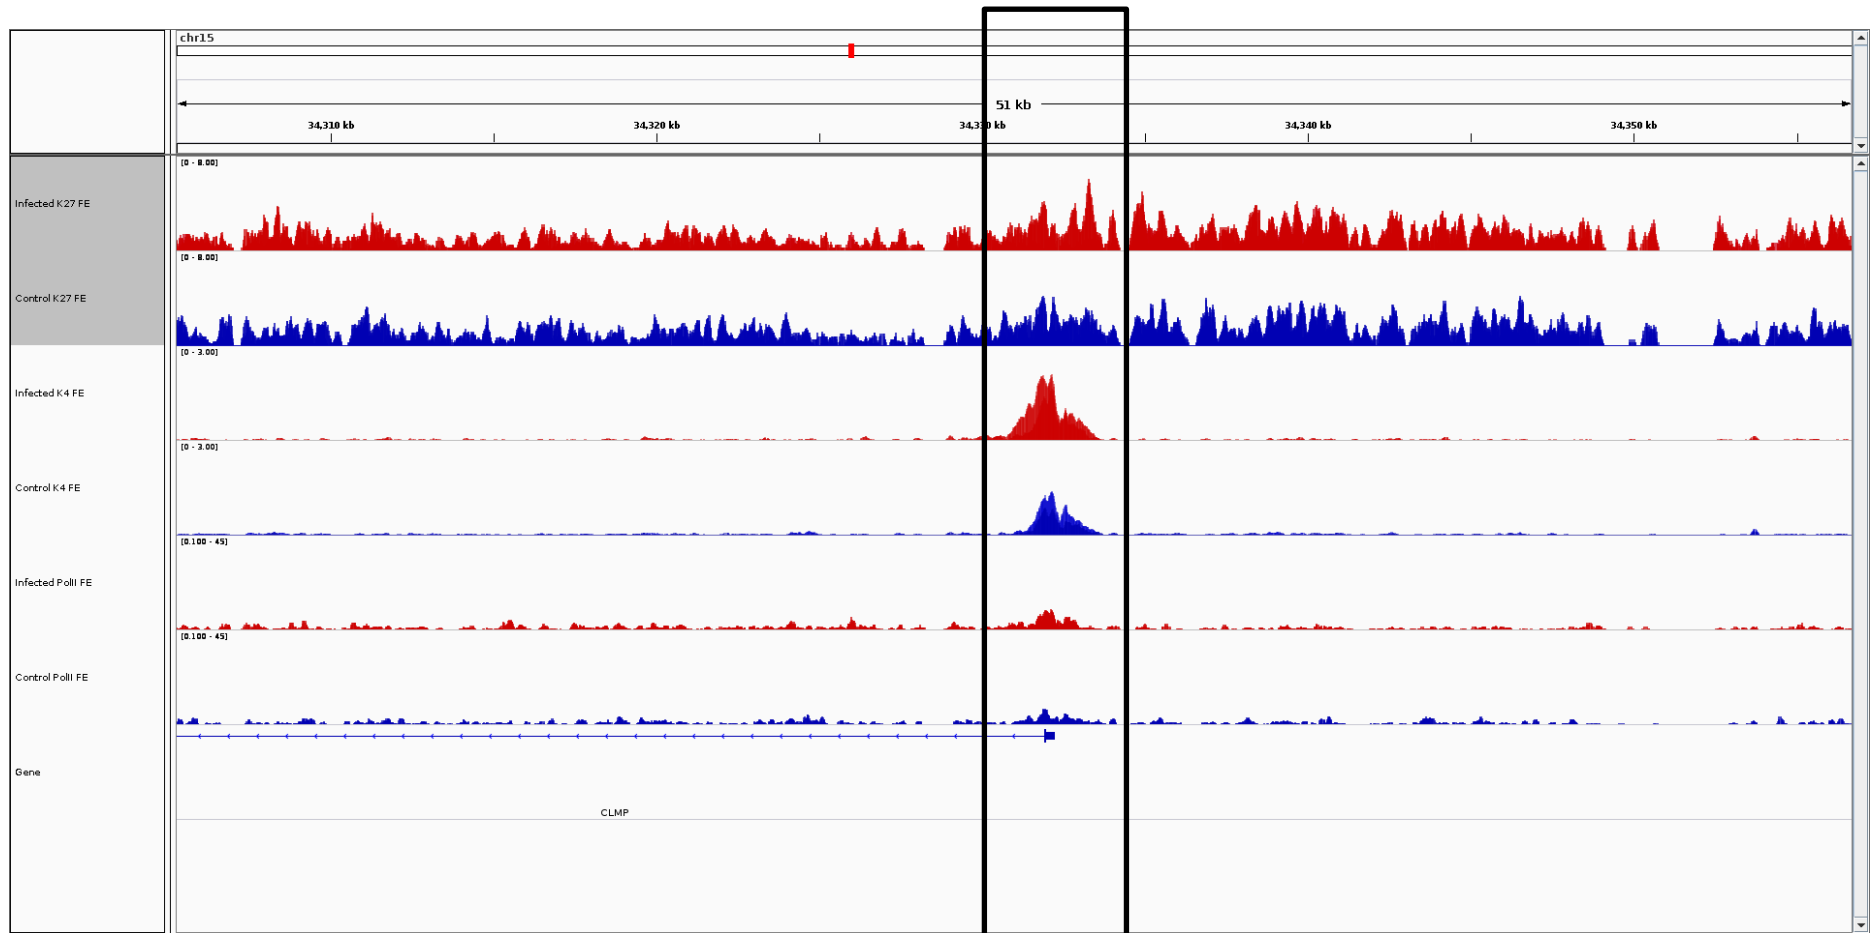

**ASAM**

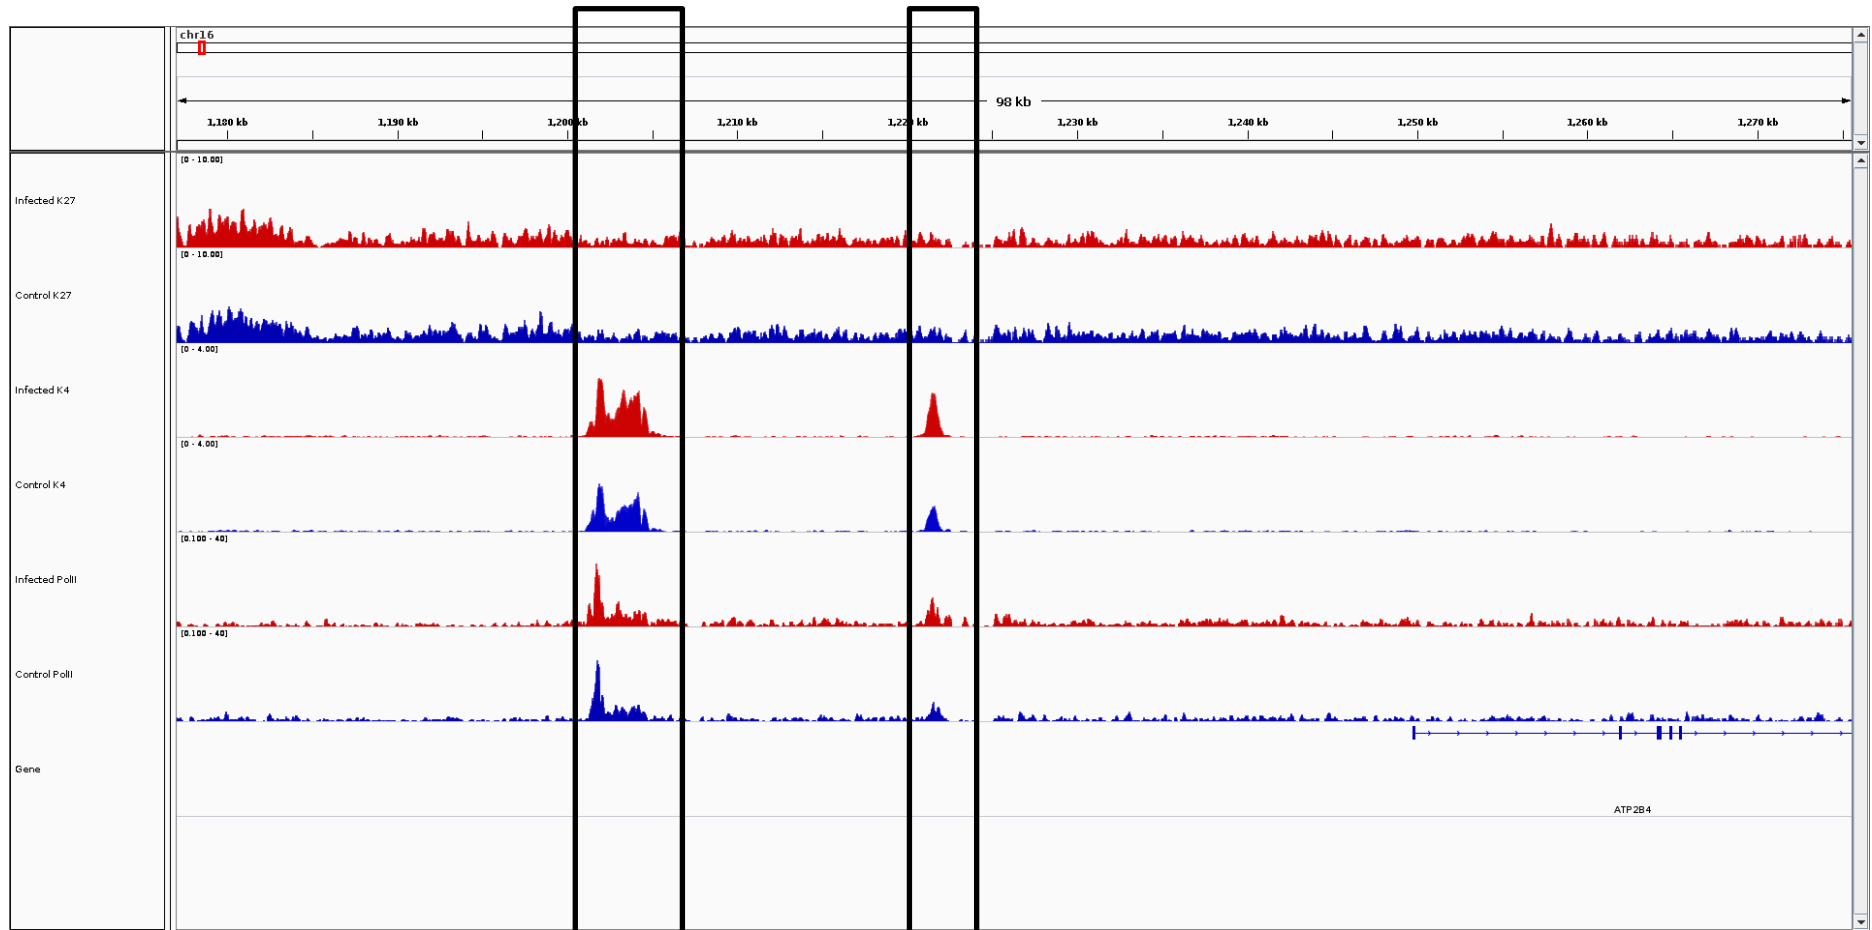

***ATP2B4***

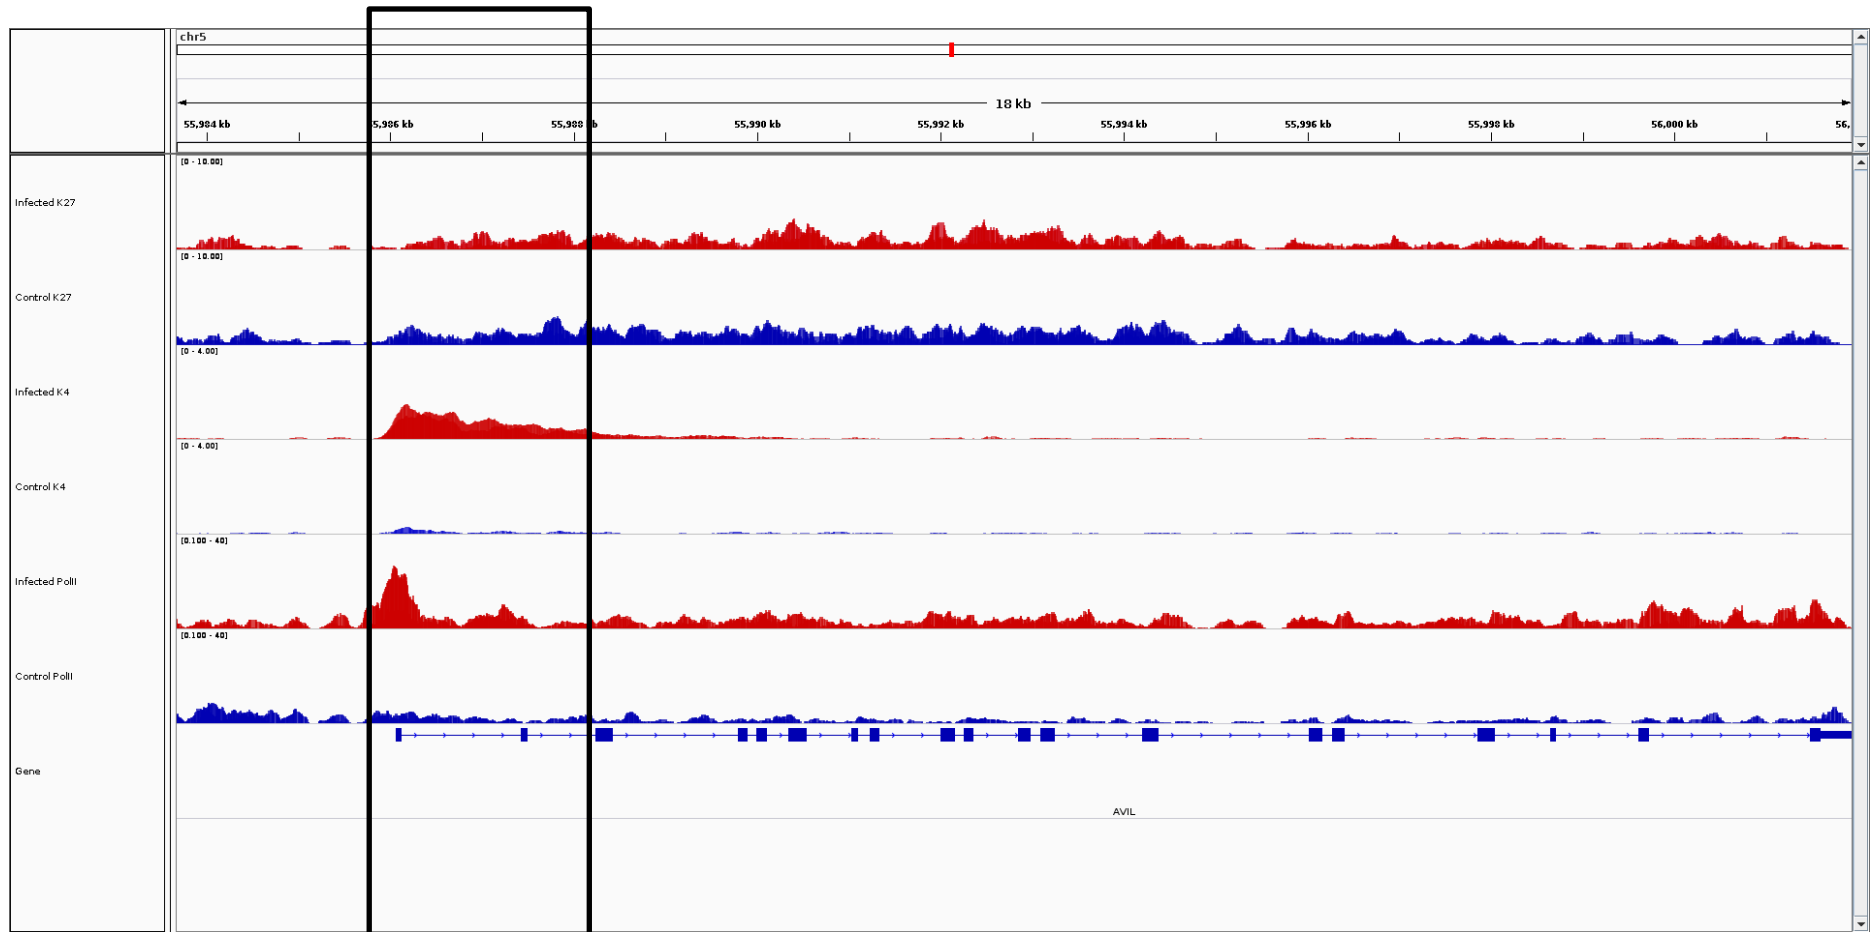

*AVIL*

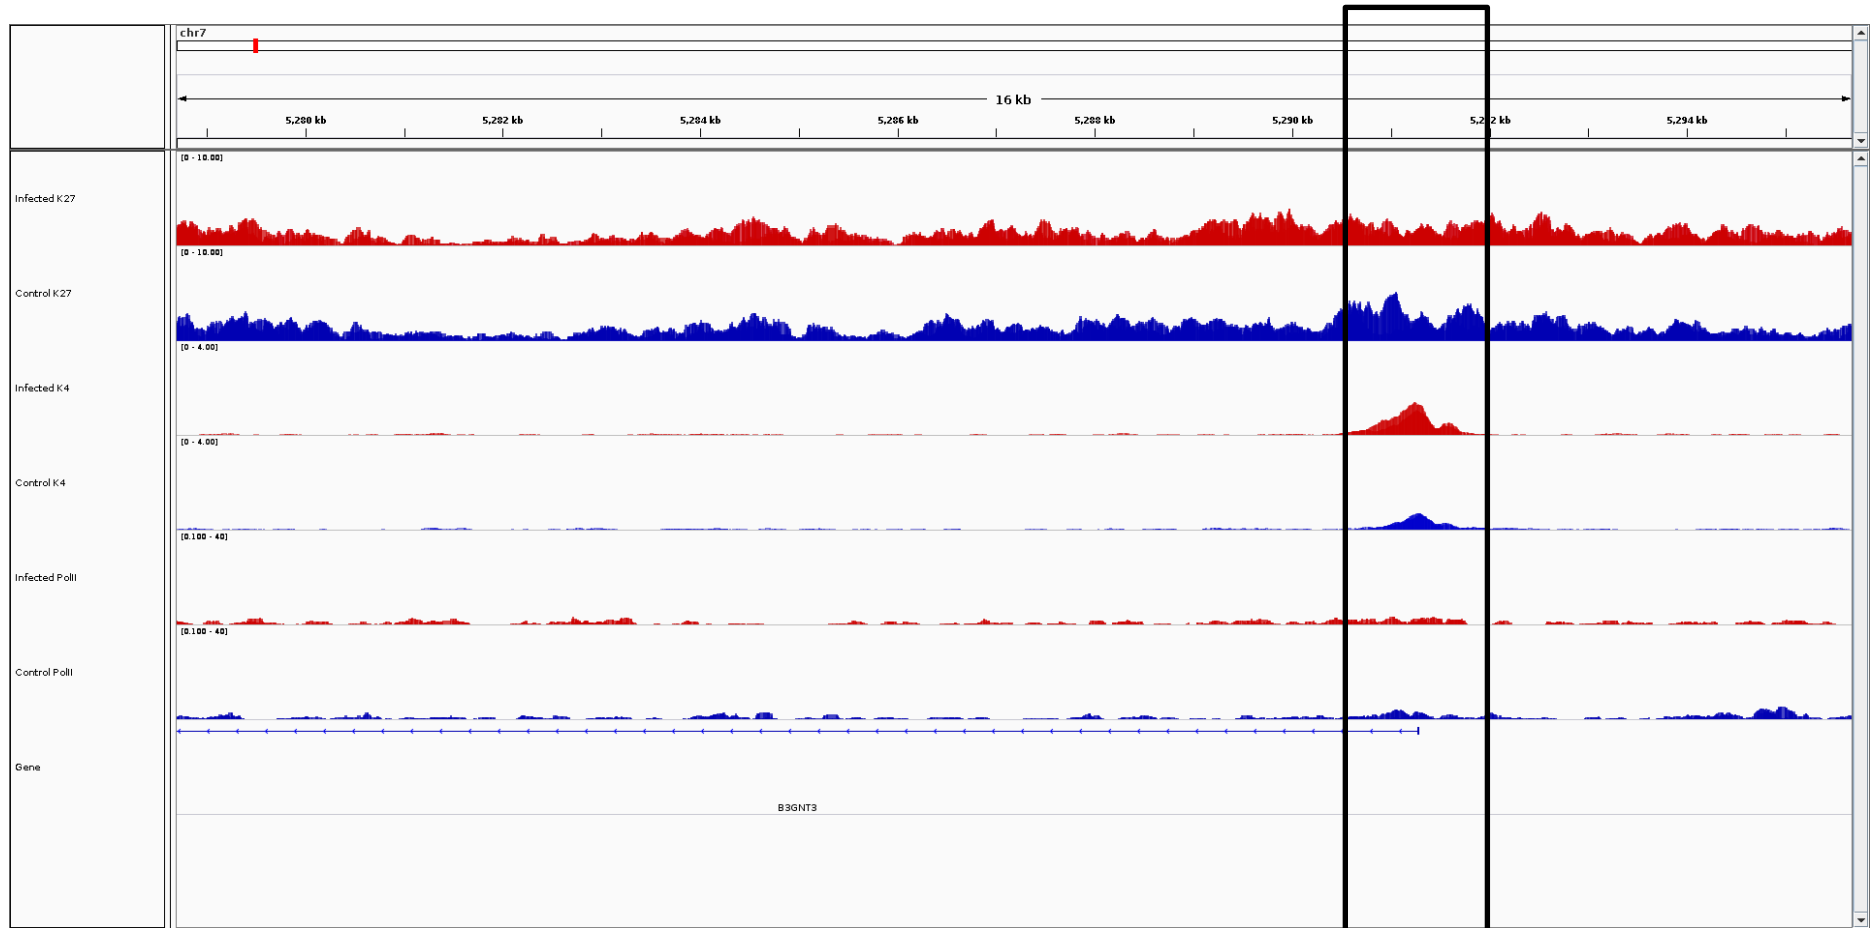

***B3GNT3***

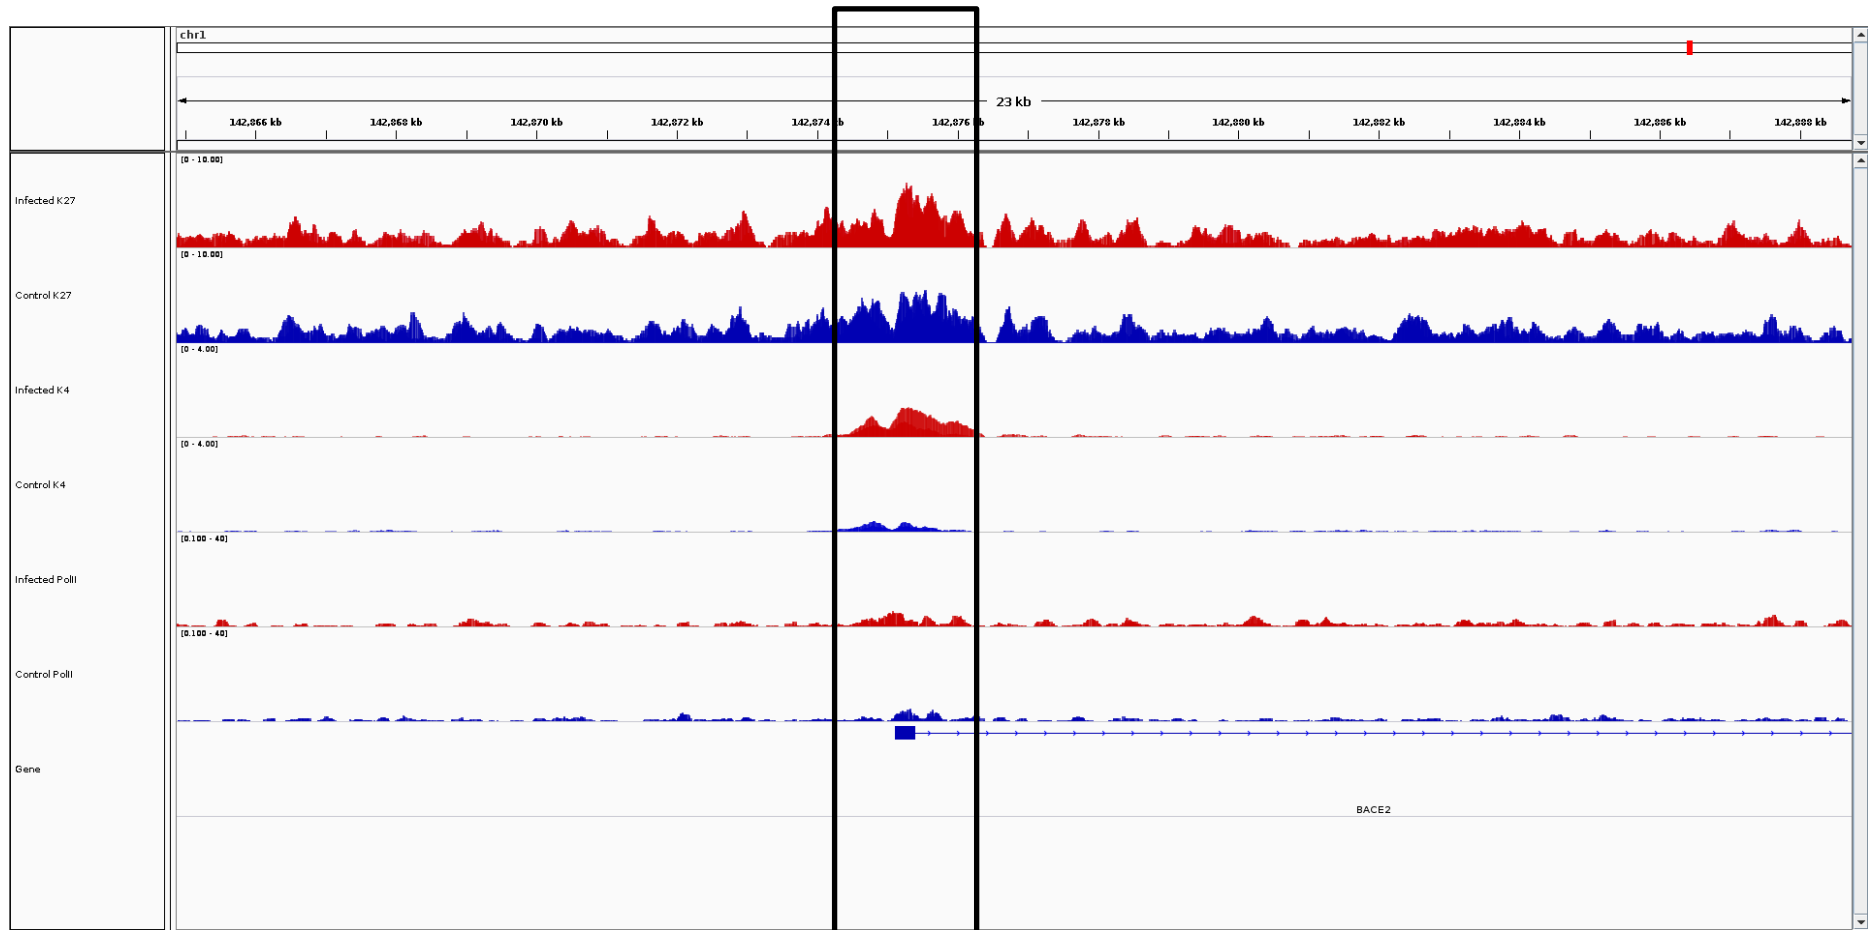

***BACE2***

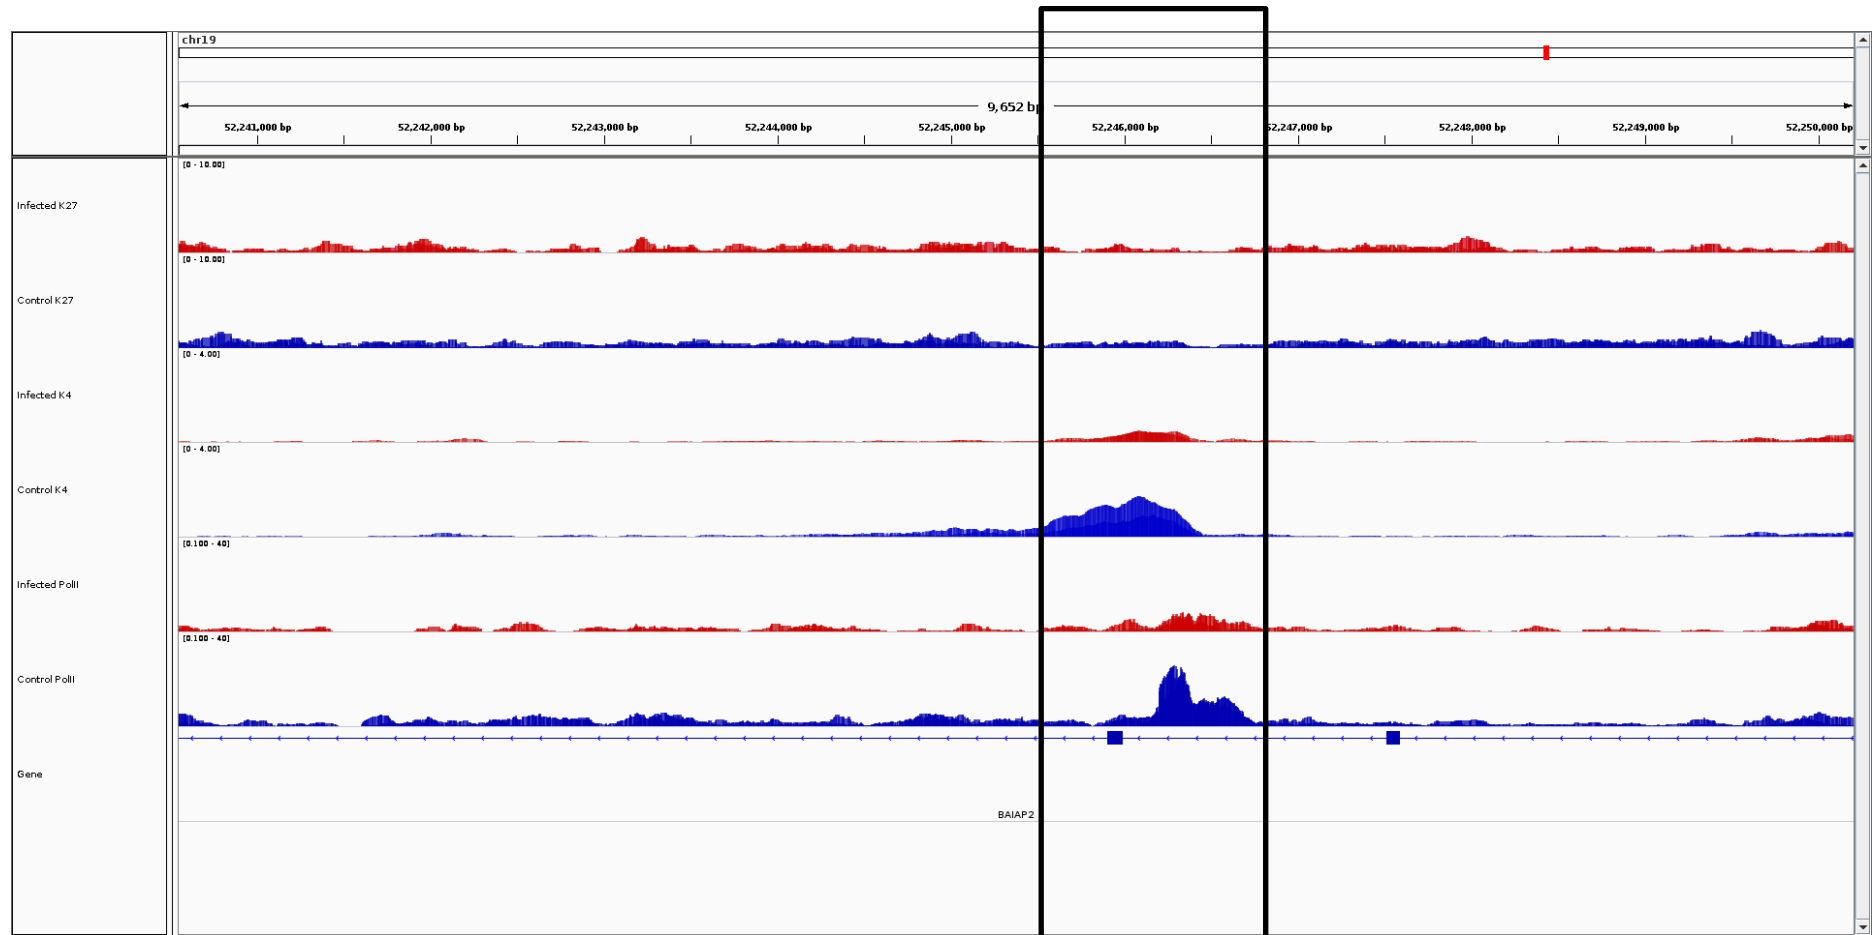

***BAIAP2***

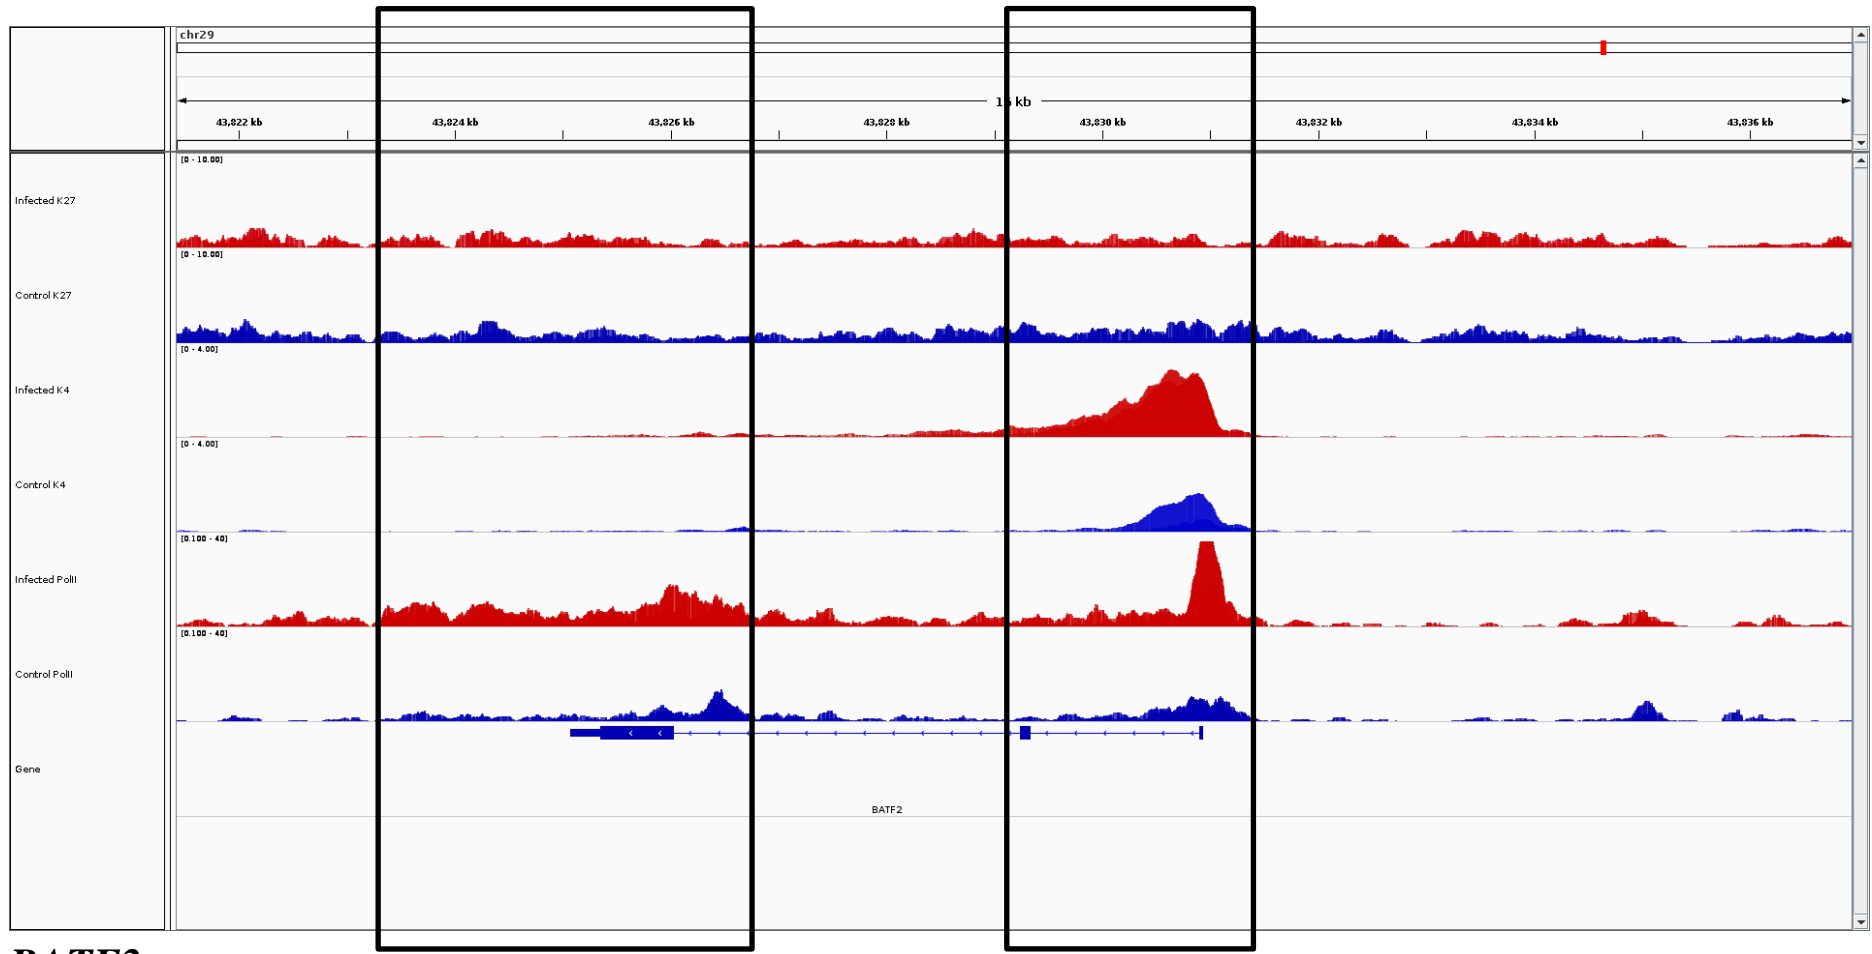

**BATF2**



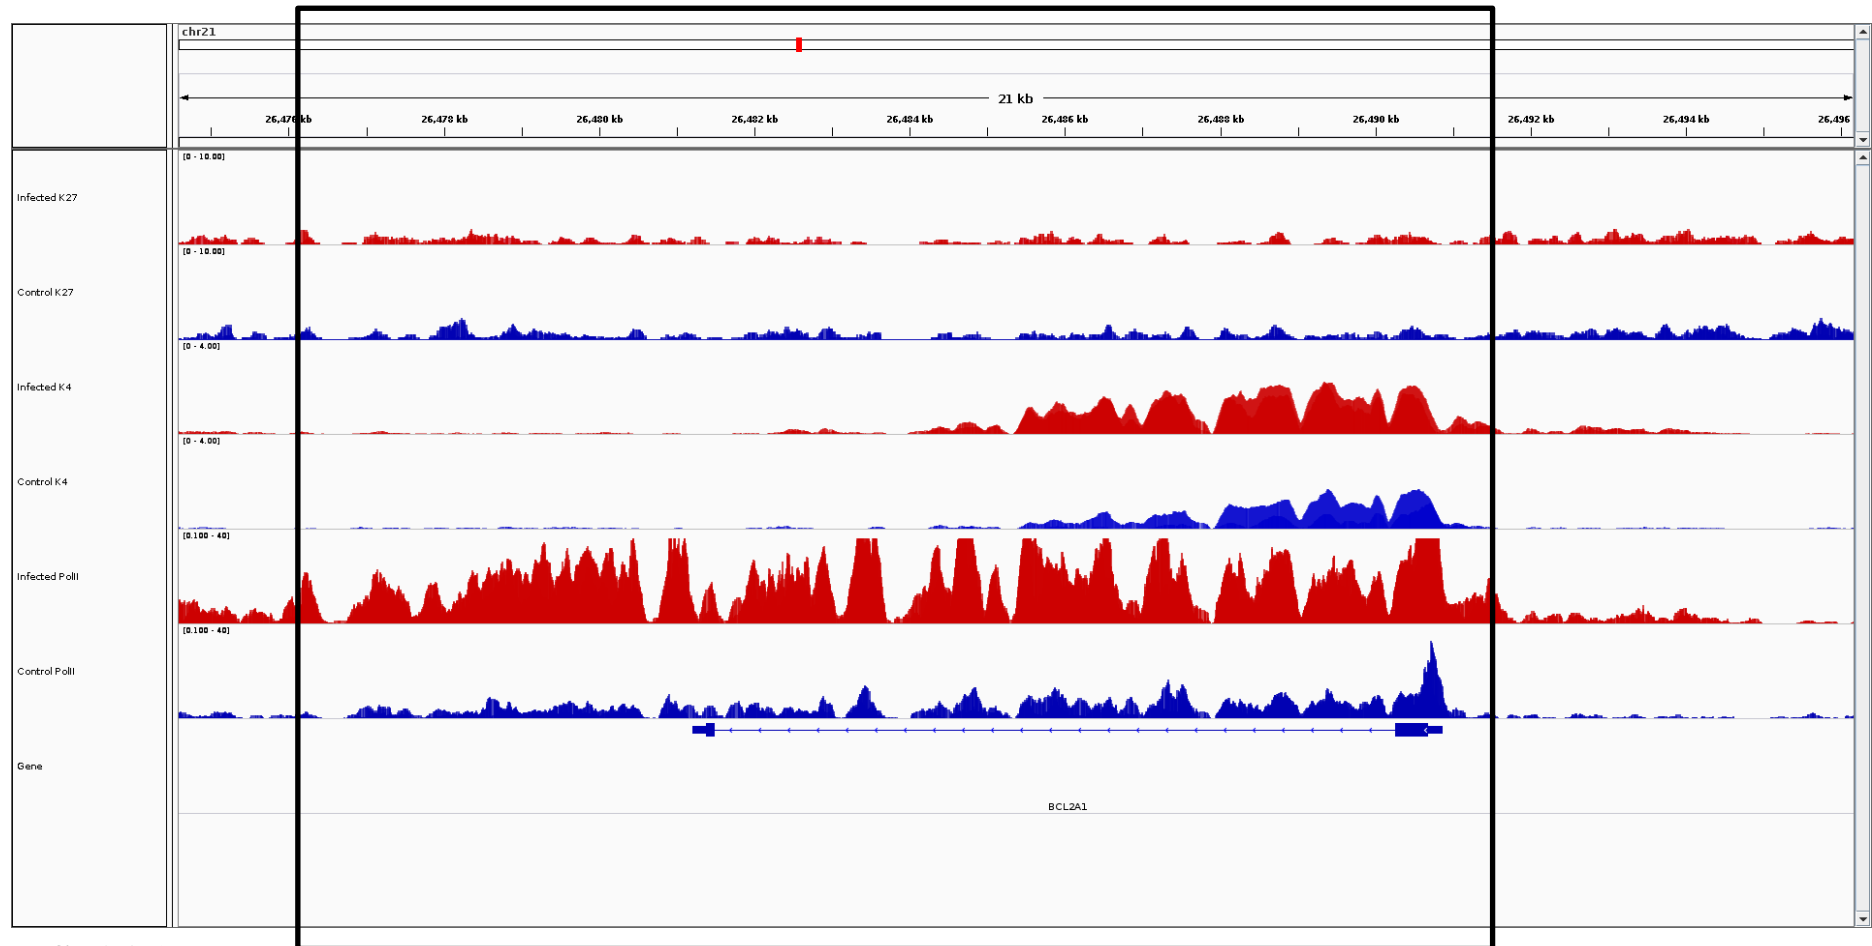

*BCL2A1*

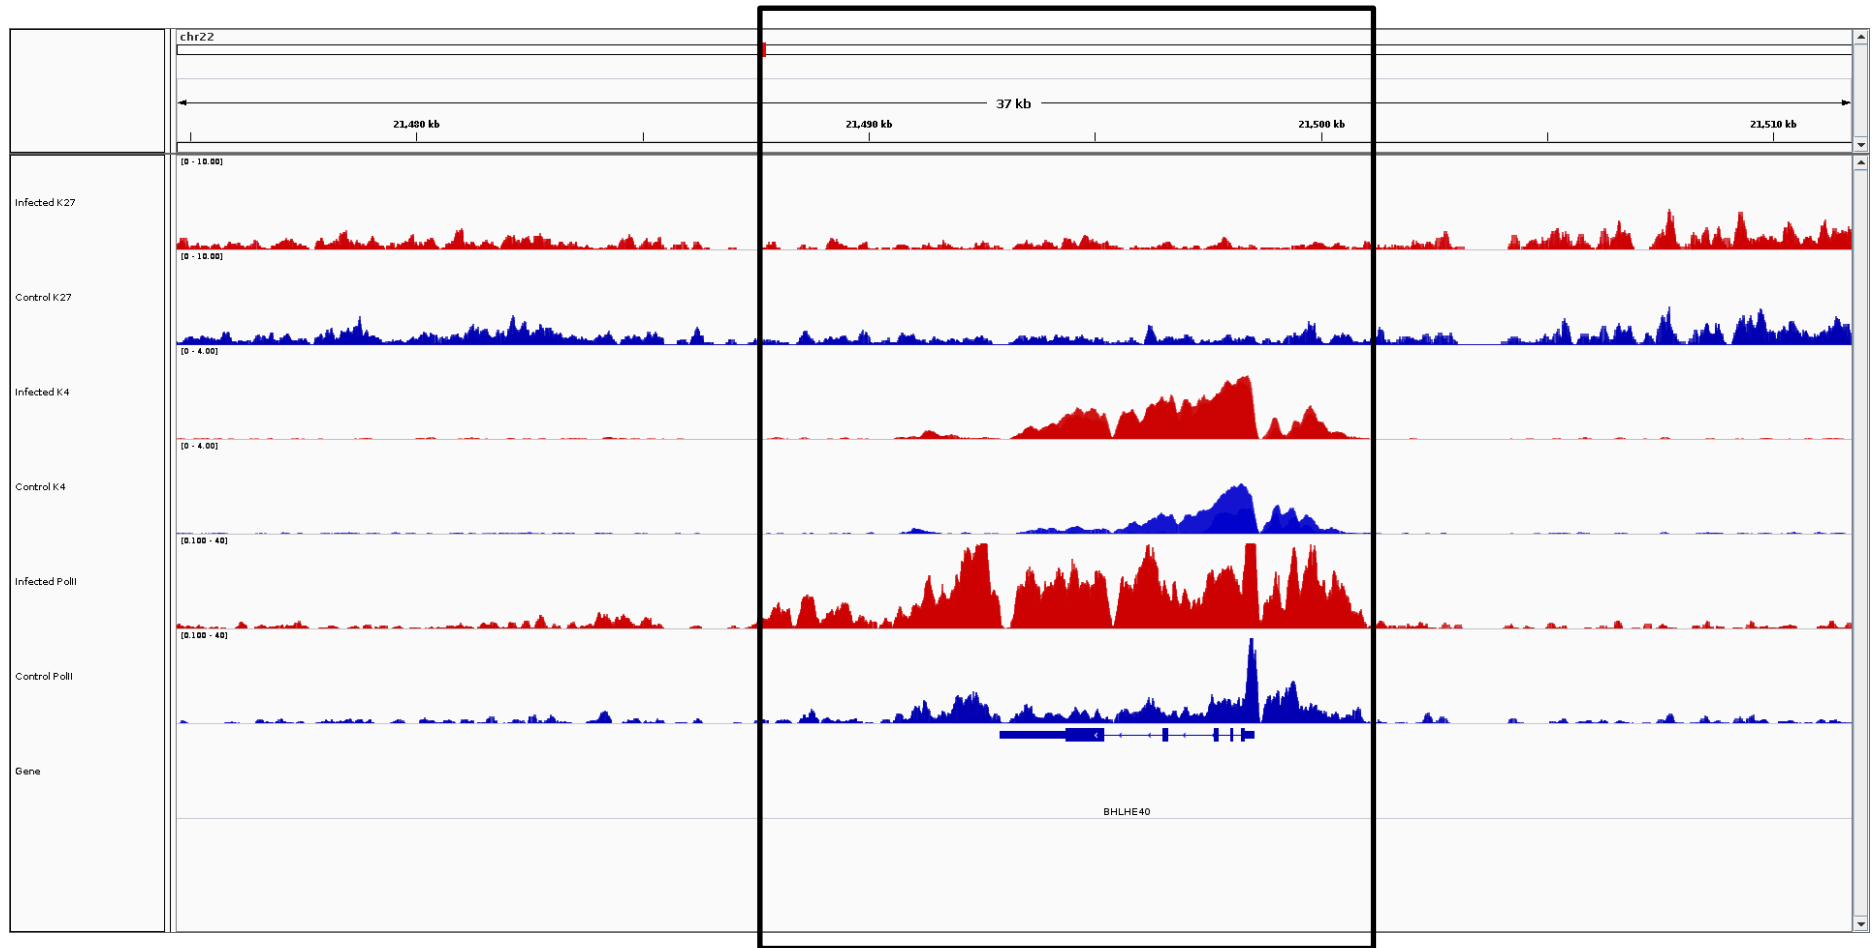

***BHLHE40***

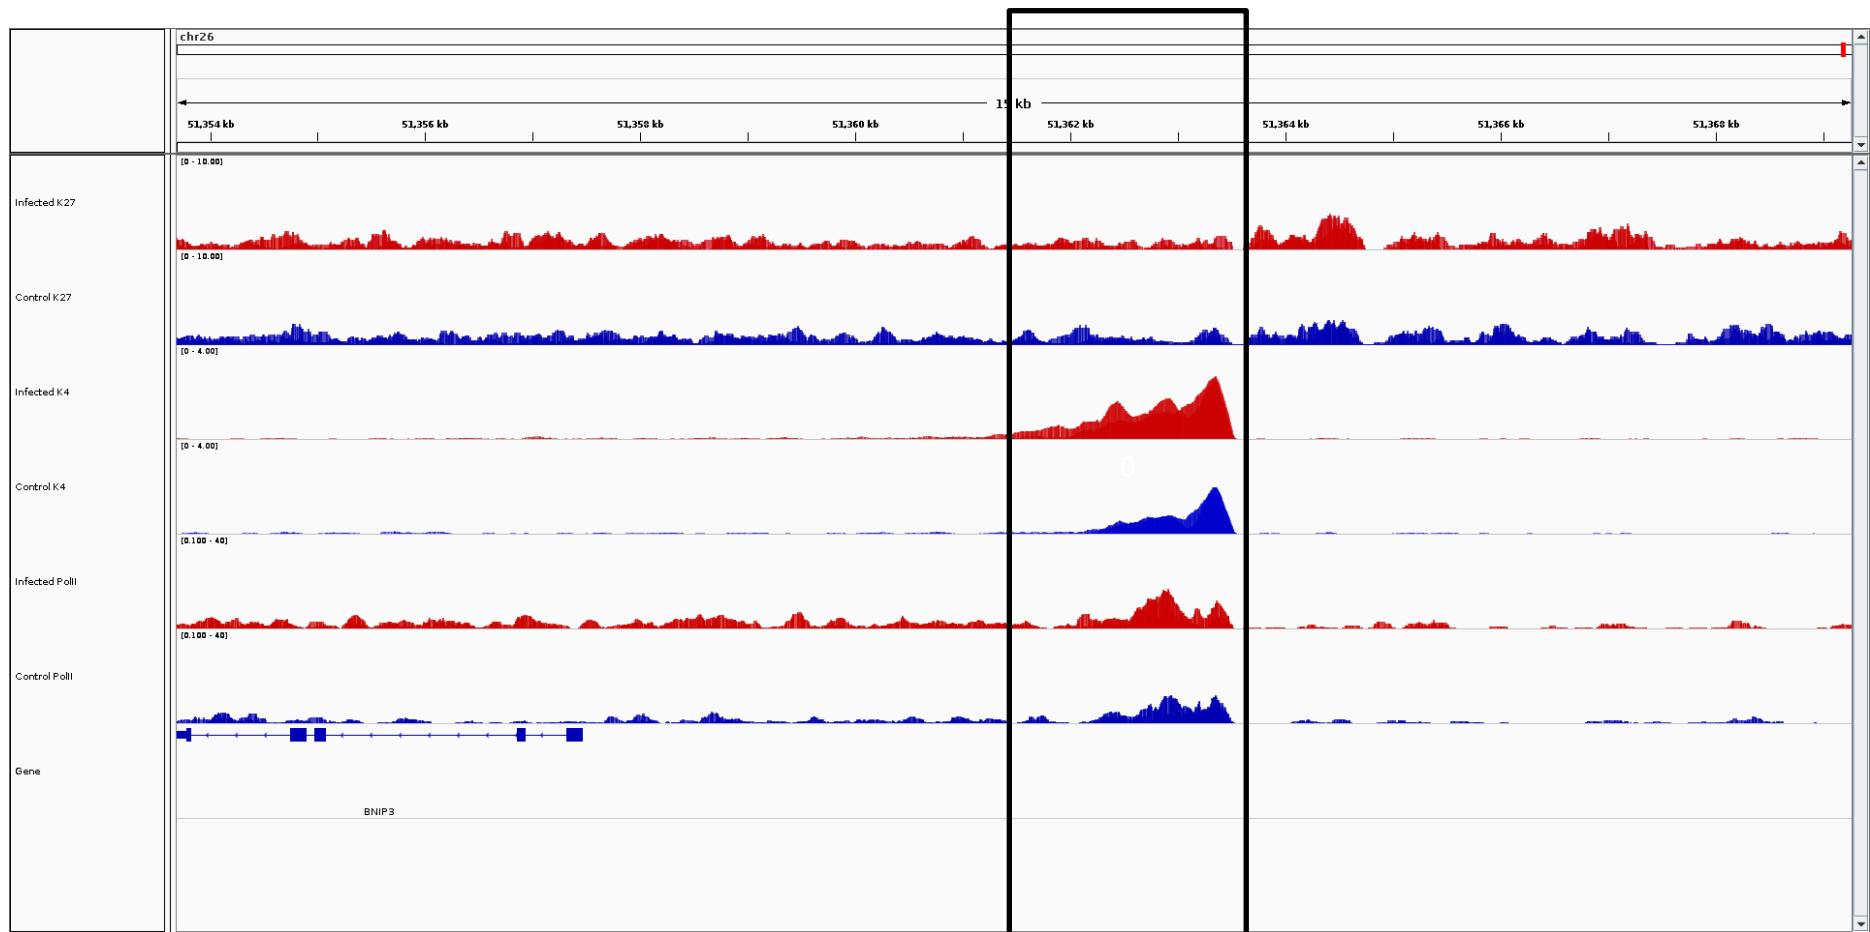

***BNIP3***

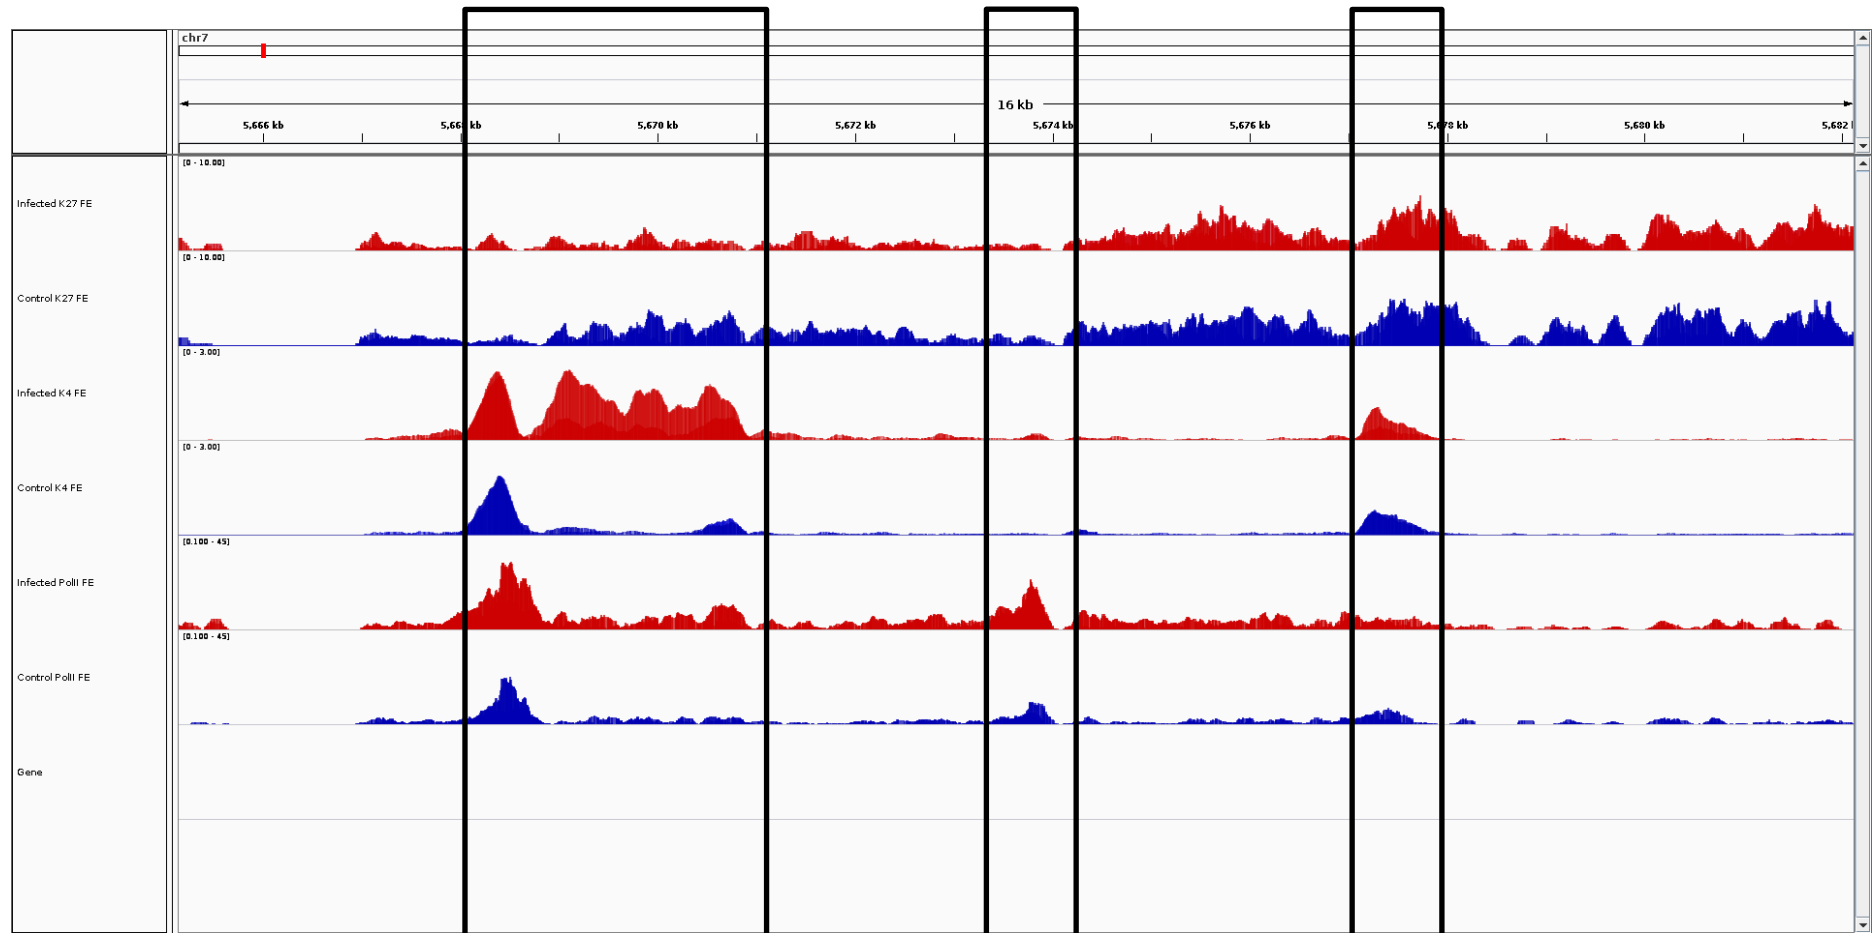

***BT.42450***

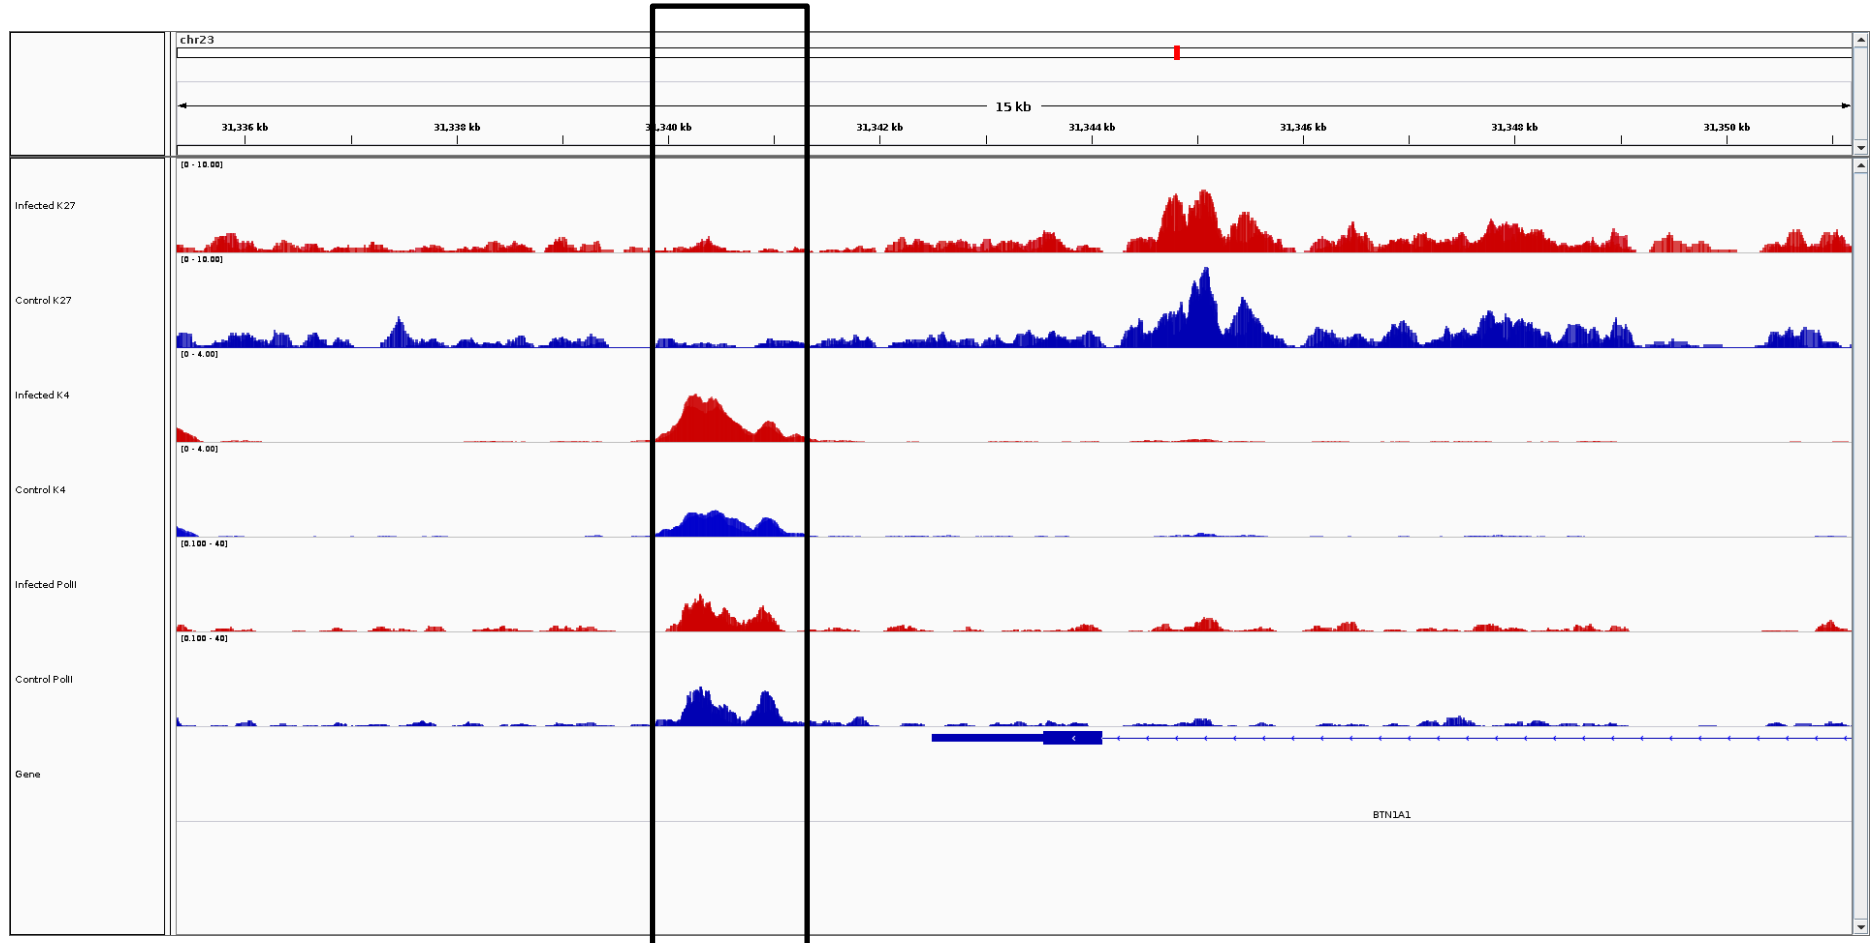

***BTN1A1***

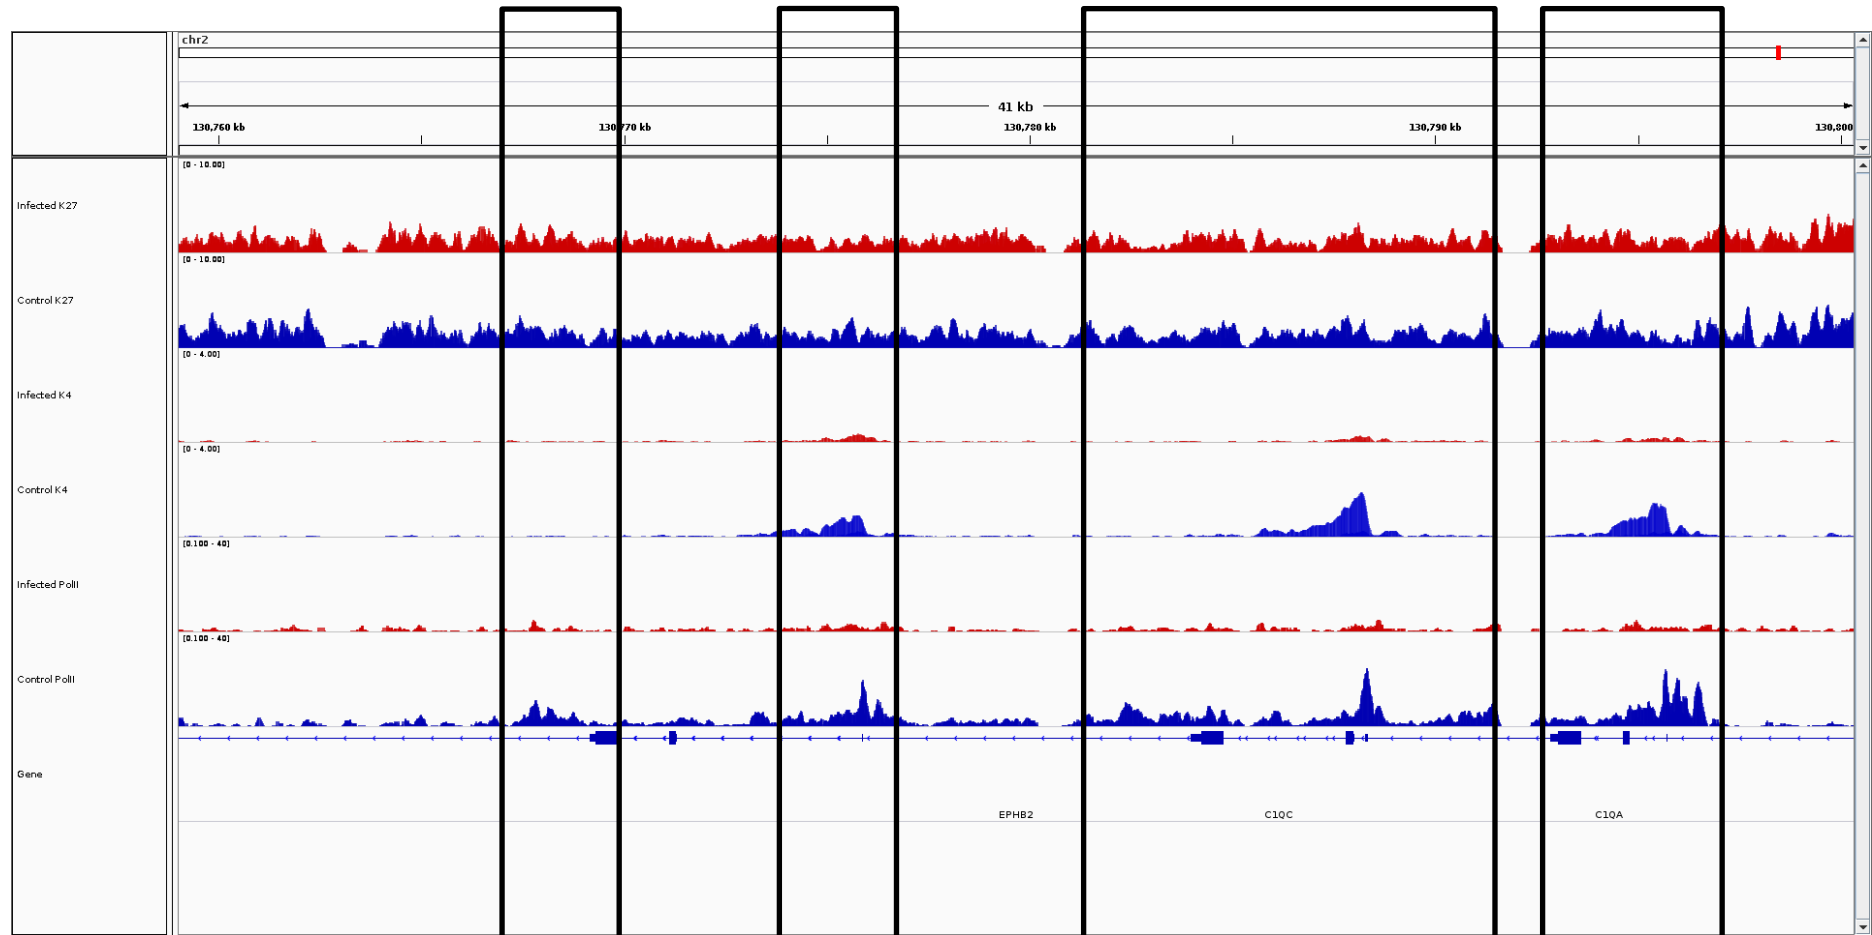

*C1QA, C1QB, C1QC*

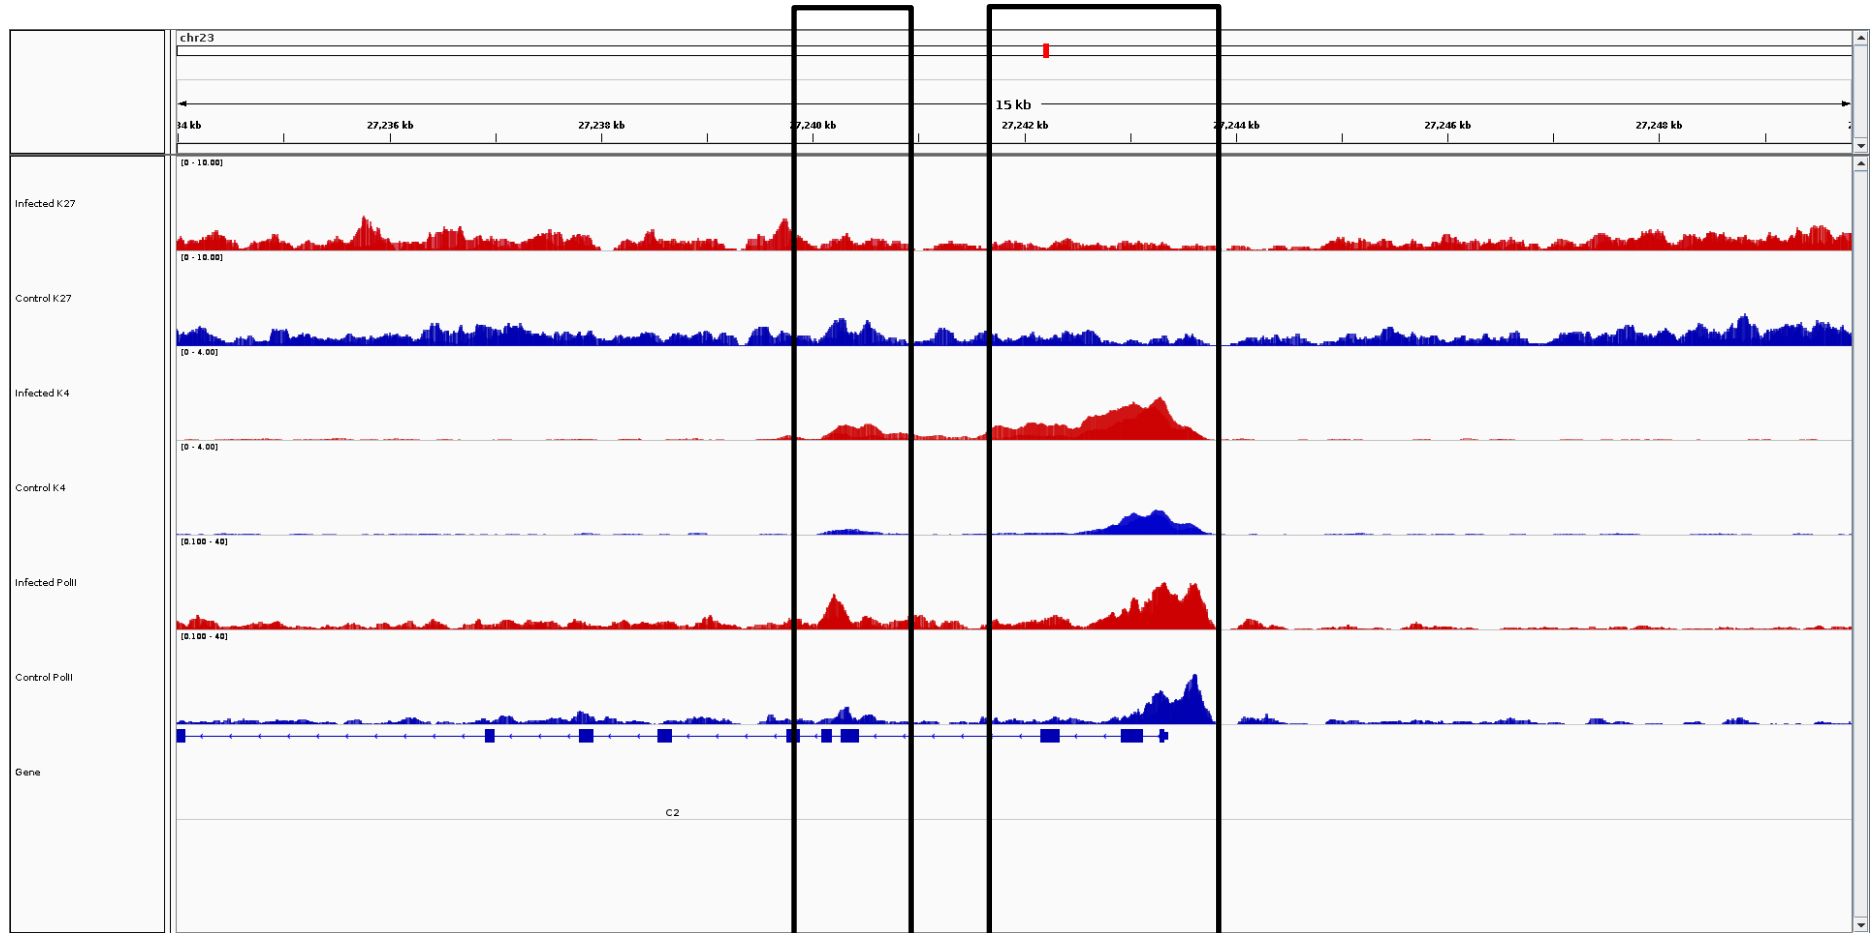

**C2**

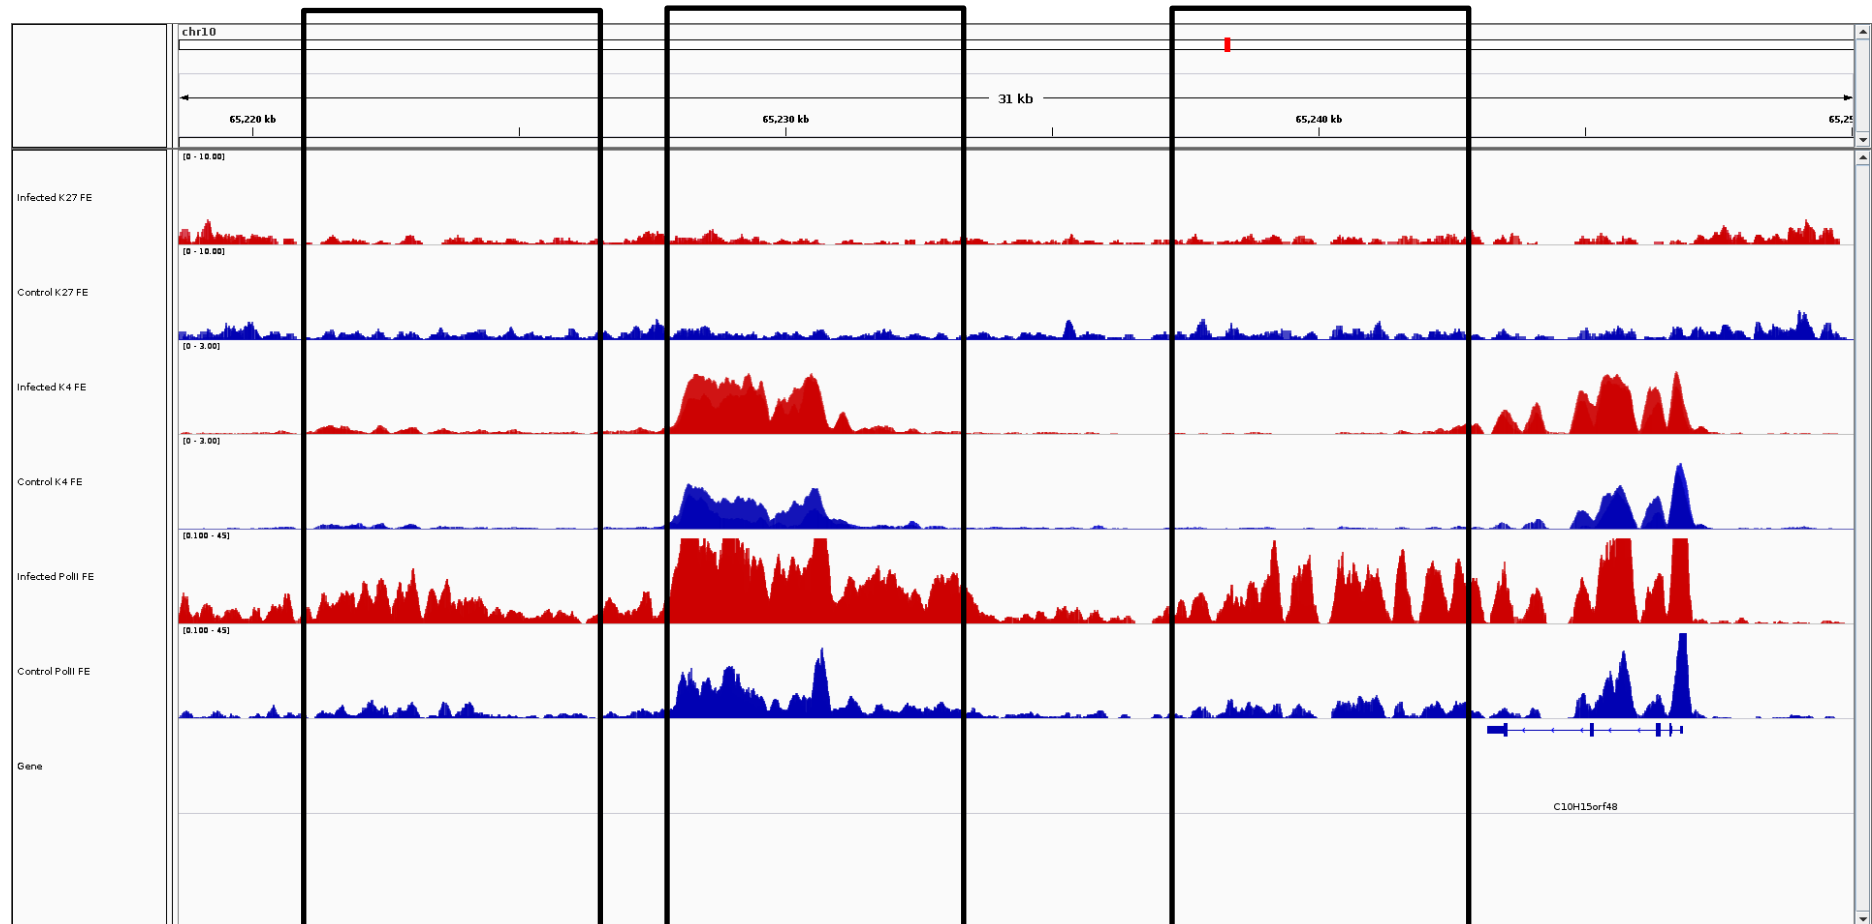

*C10H15orf48*



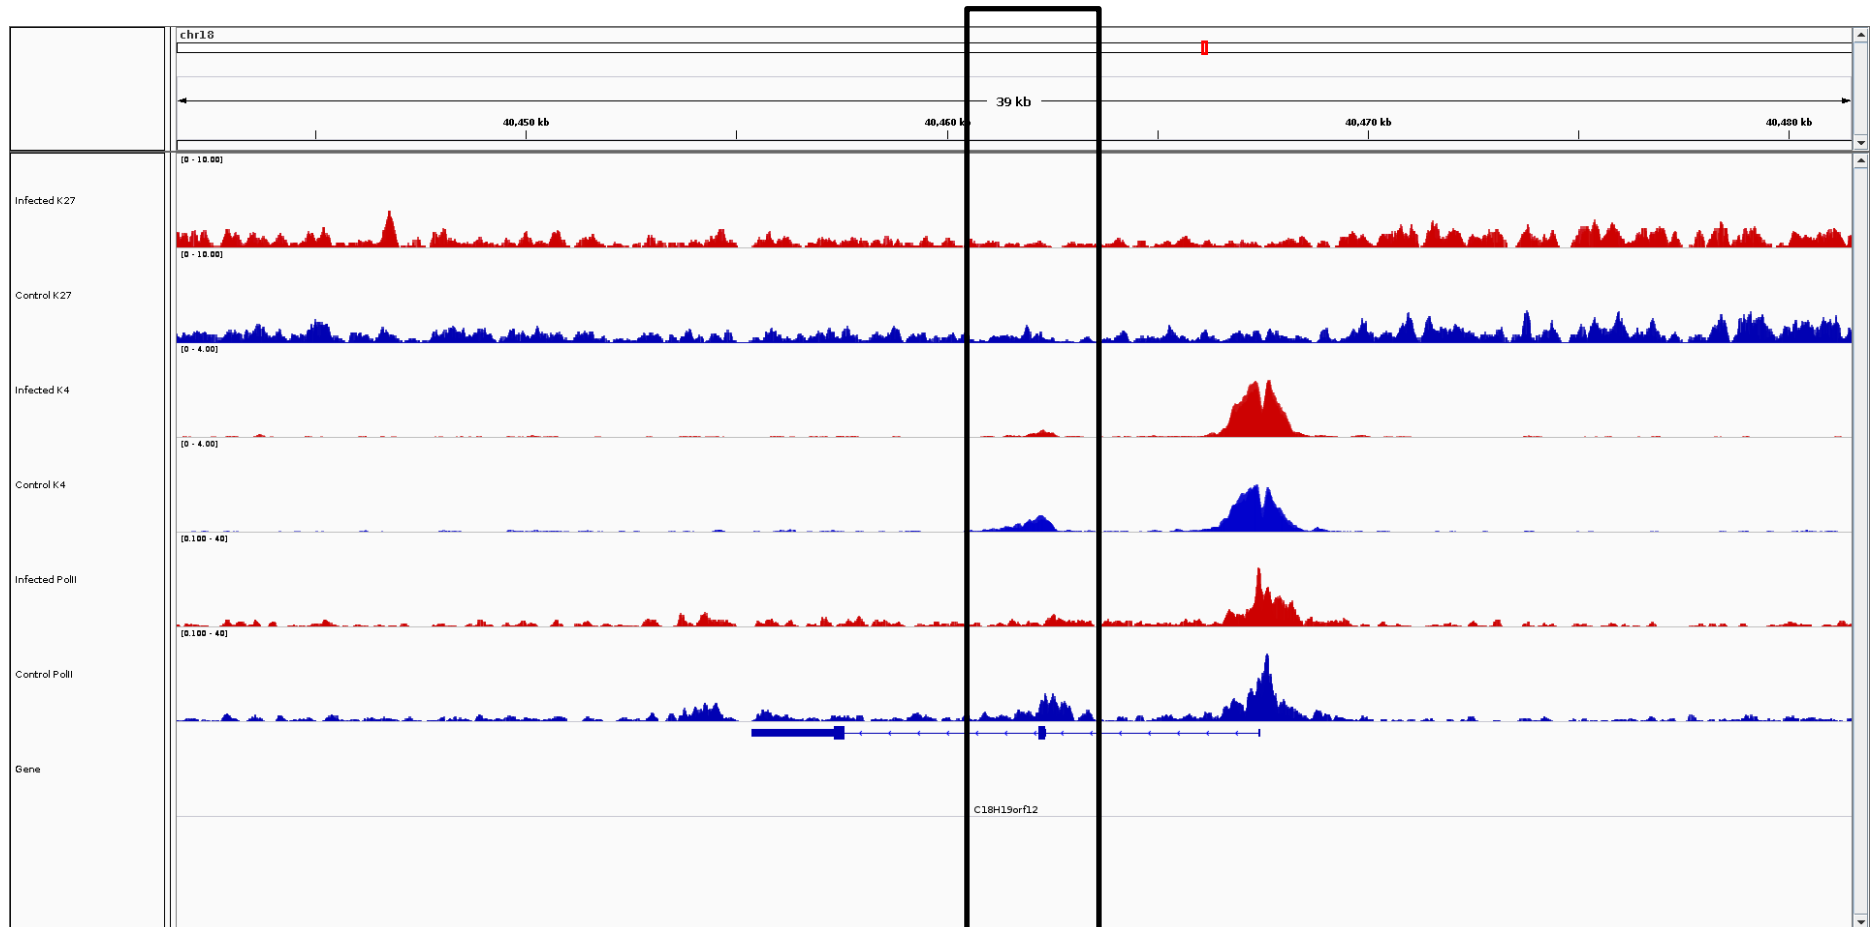

***C18H19orf12***

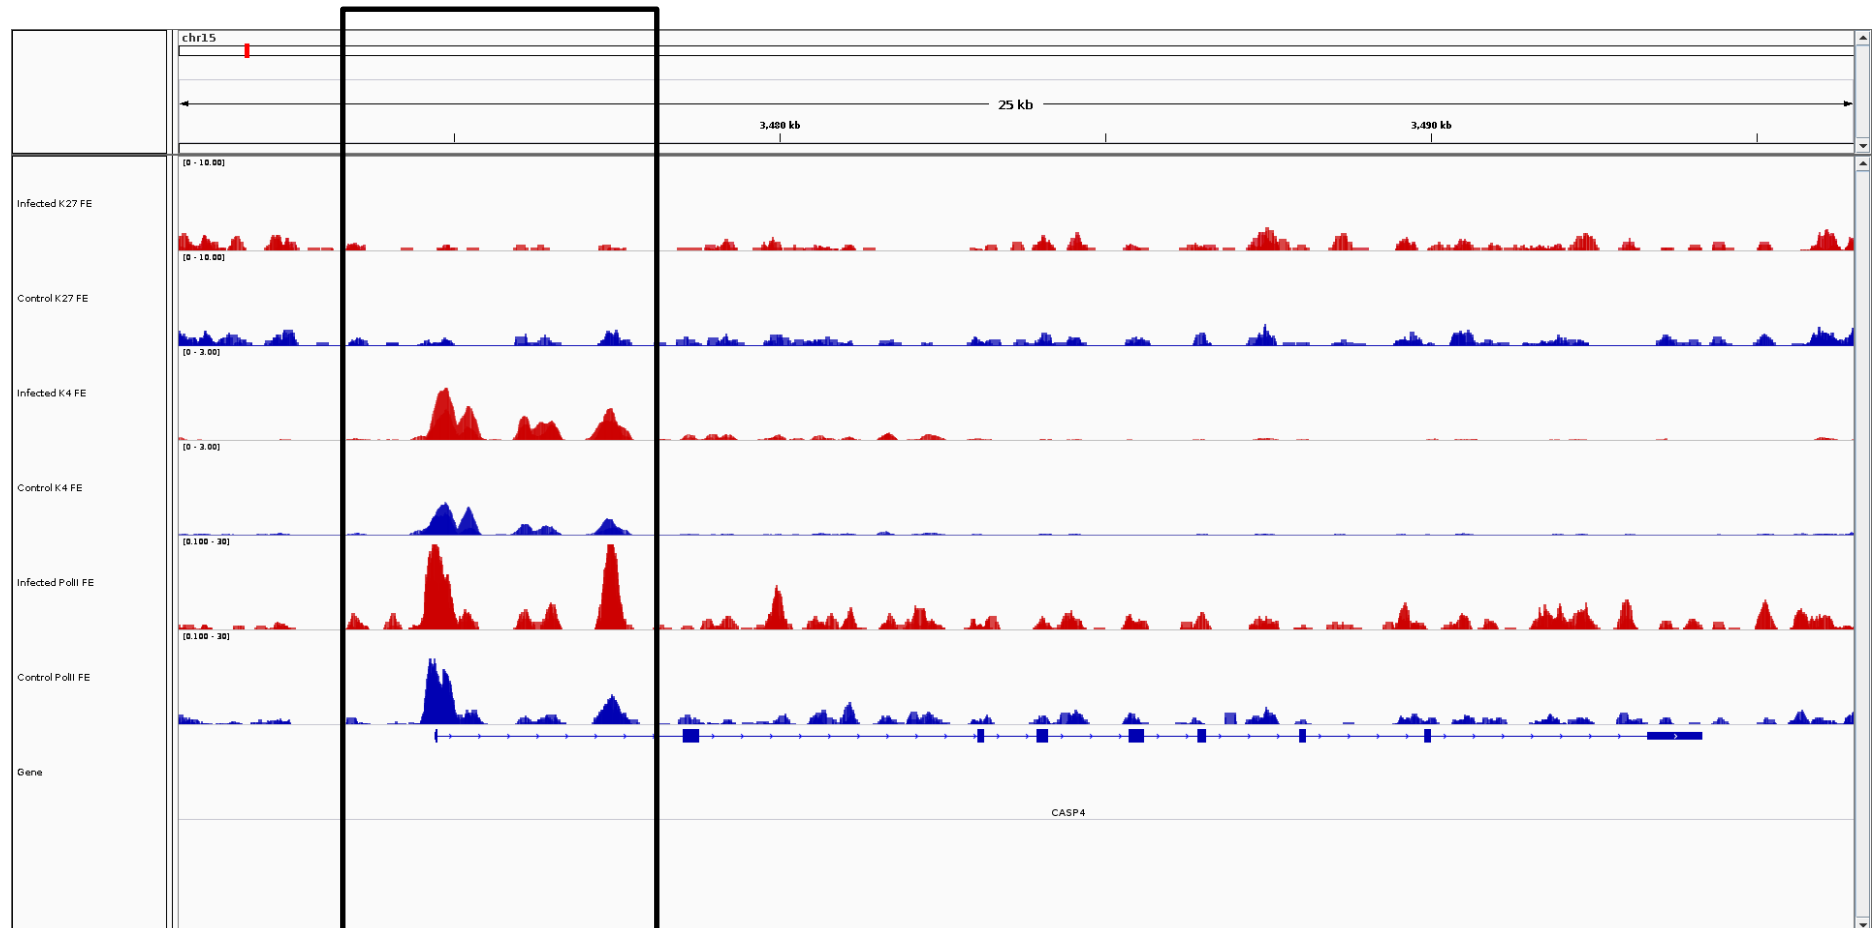

***CASP4***

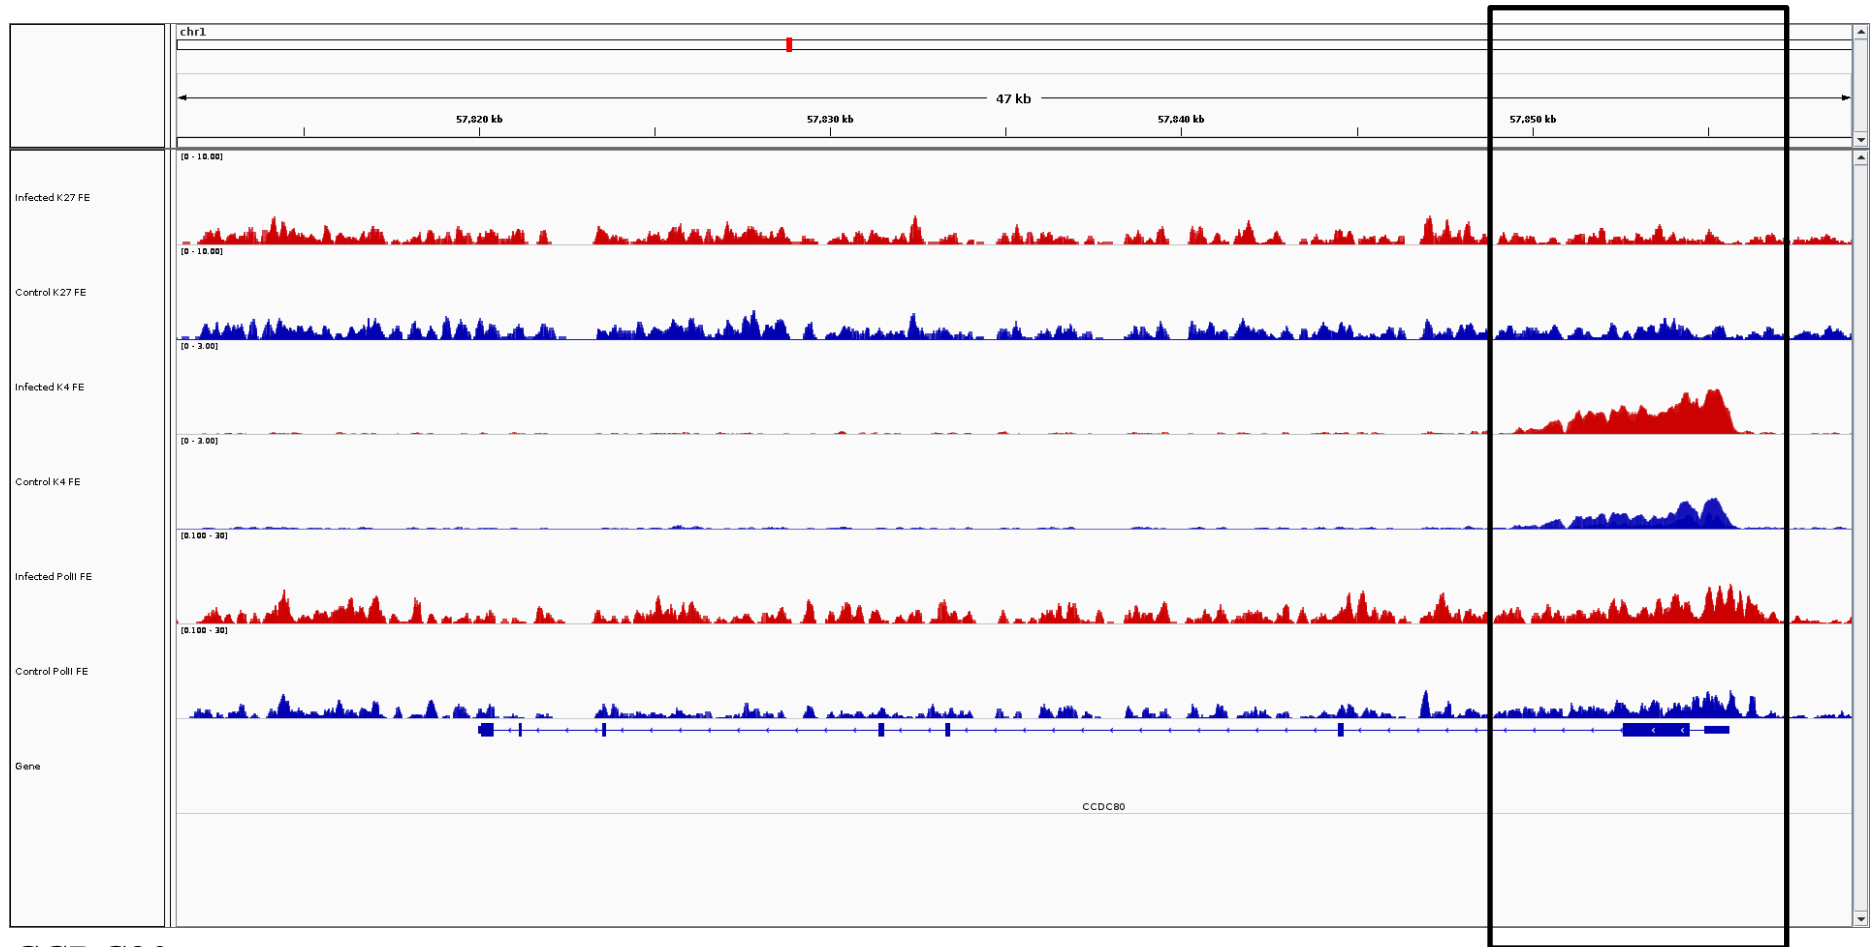

***CCDC80***

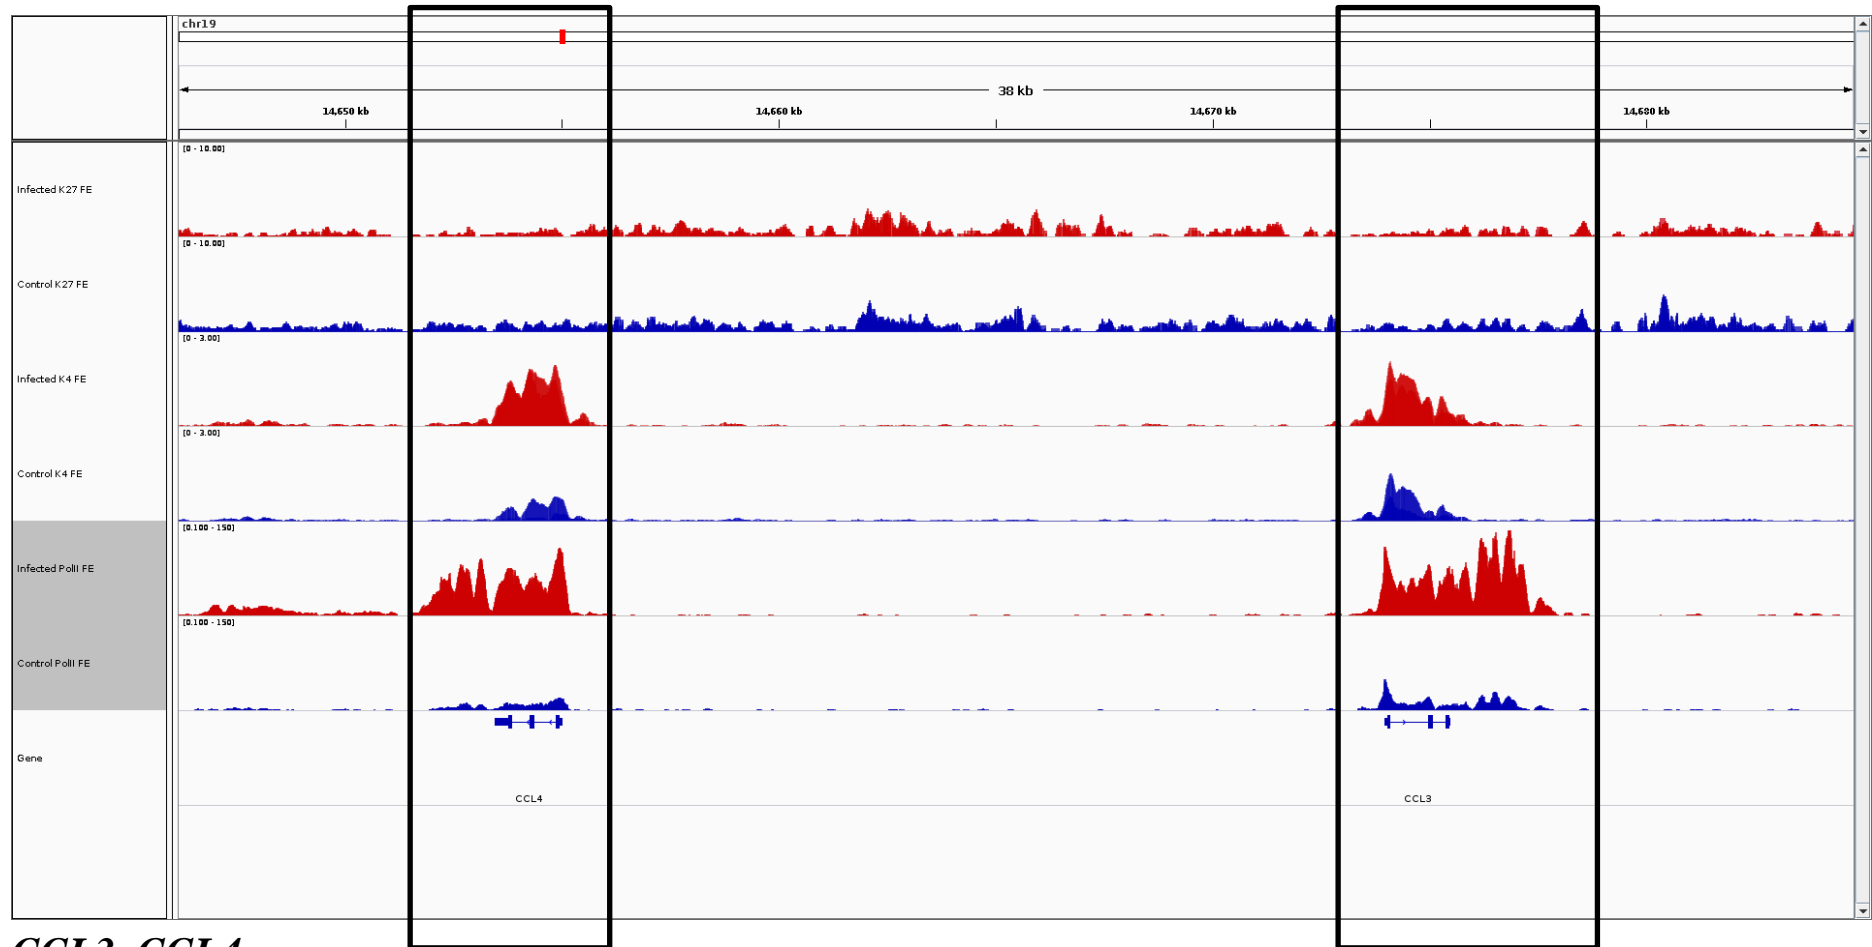

***CCL3, CCL4***

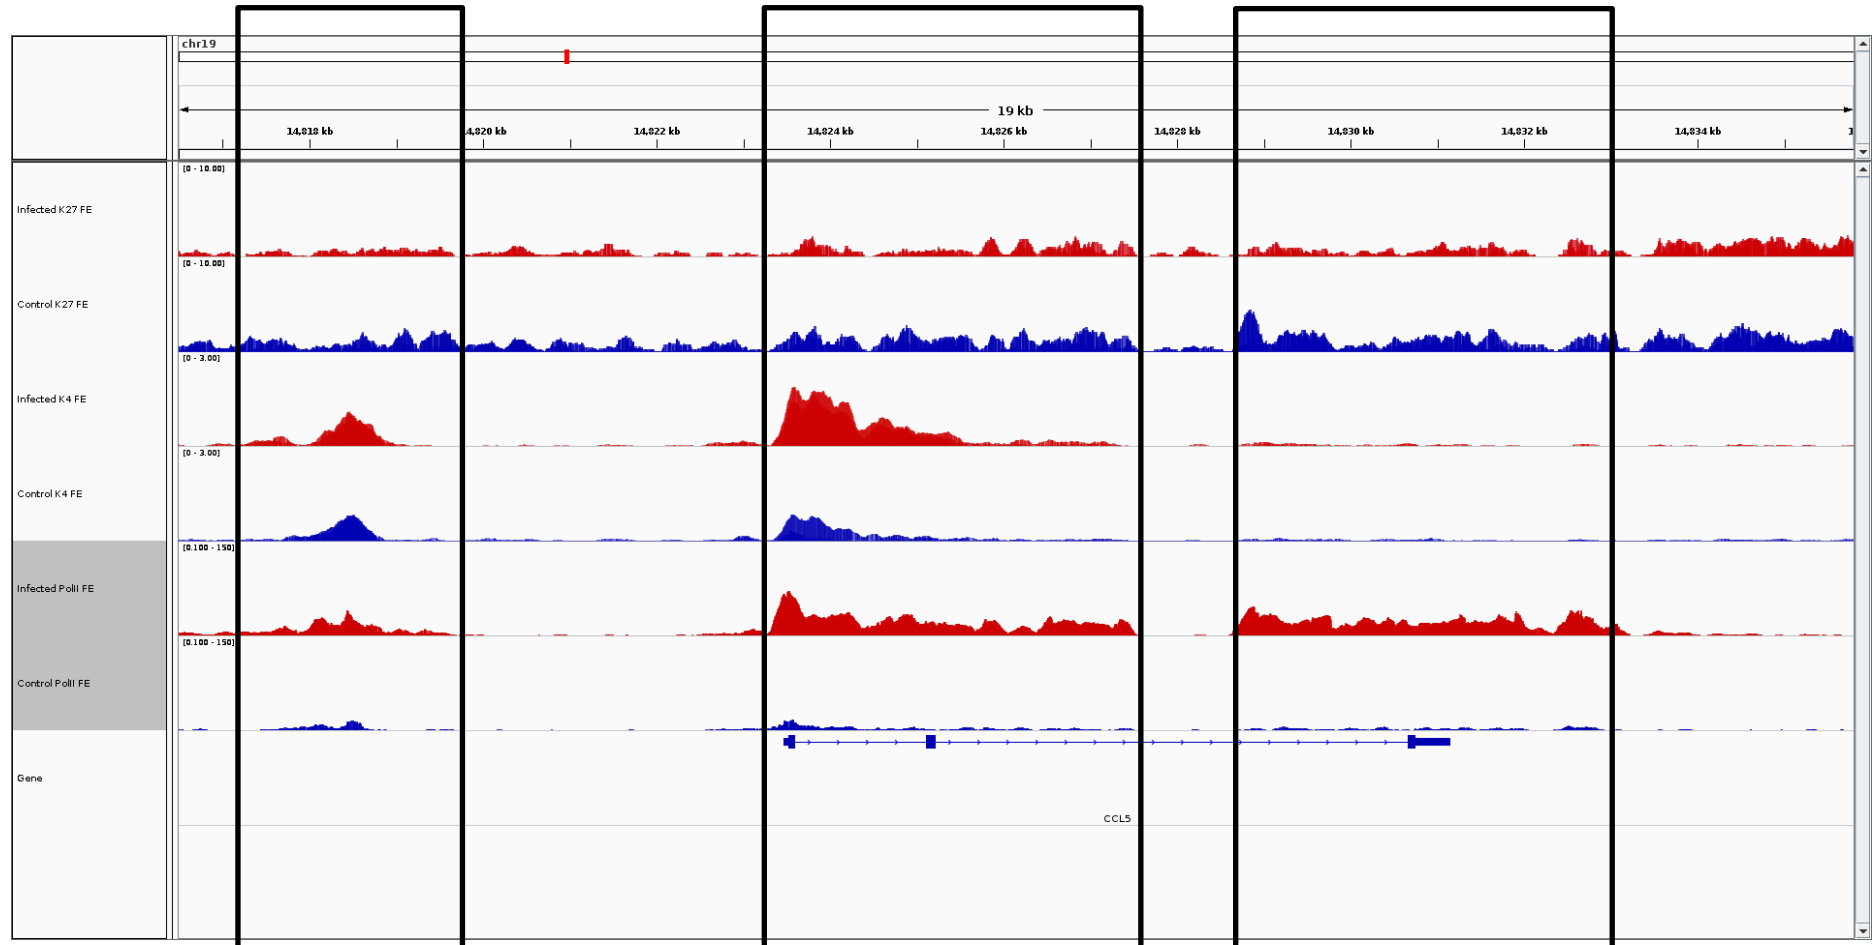

*CCL5*

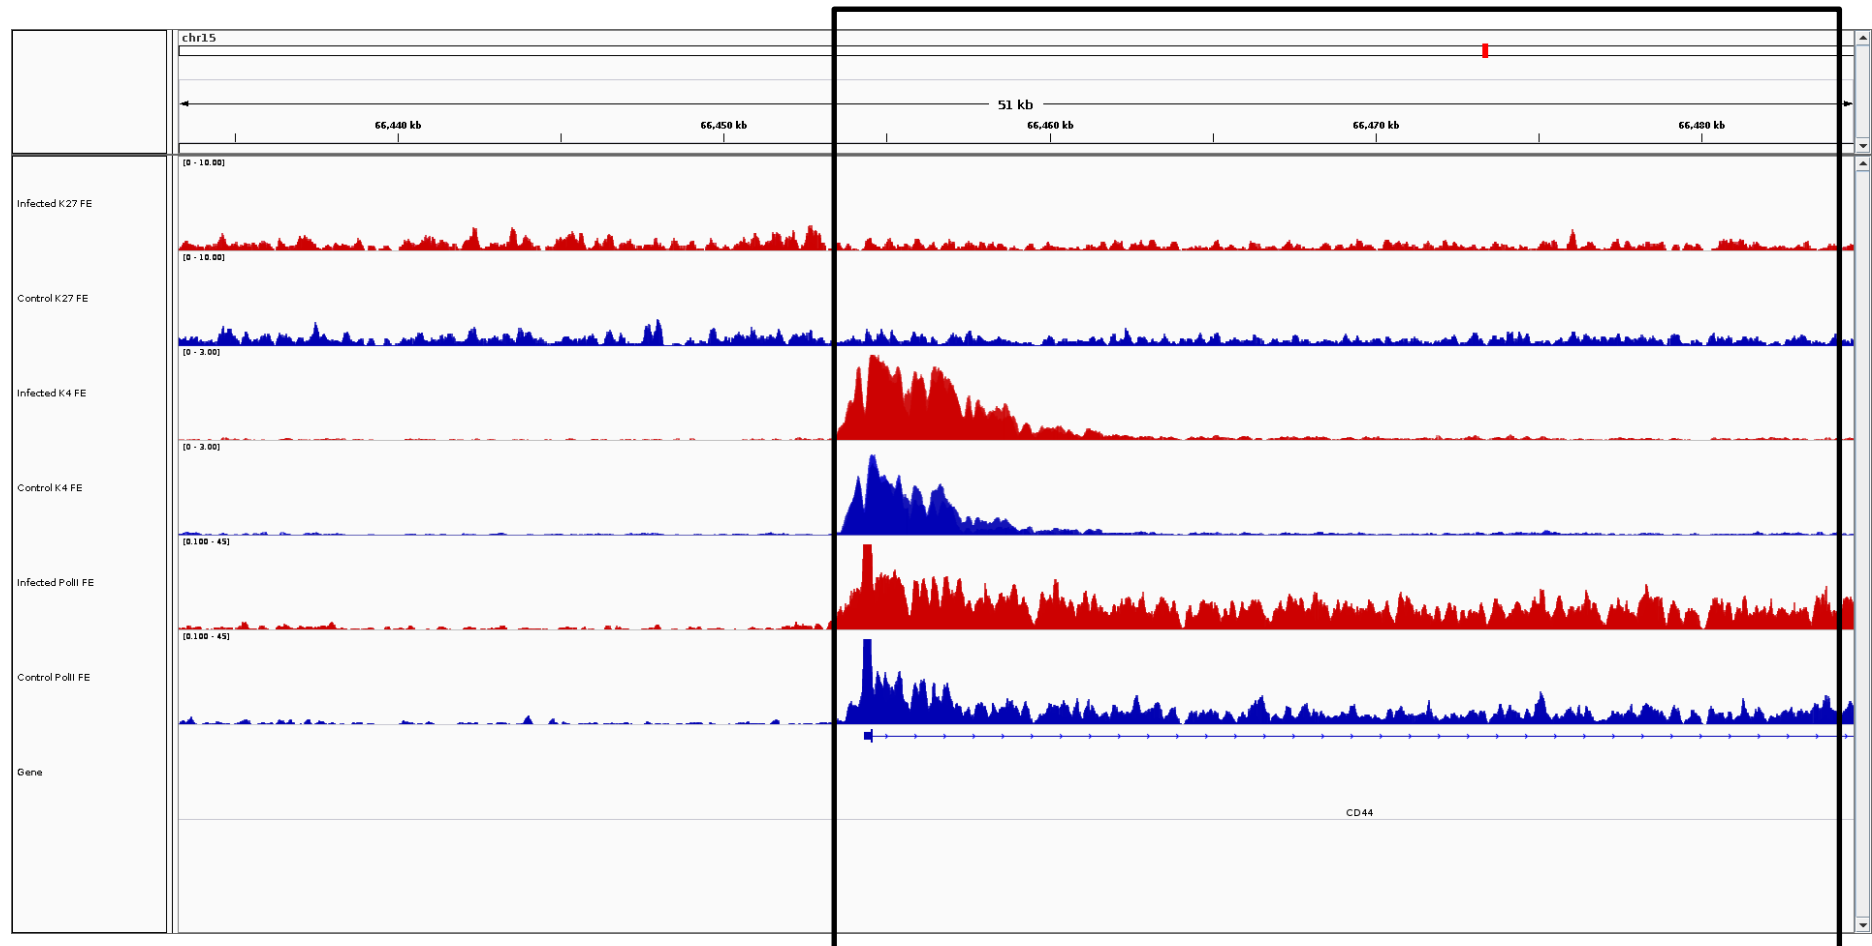***CD44***

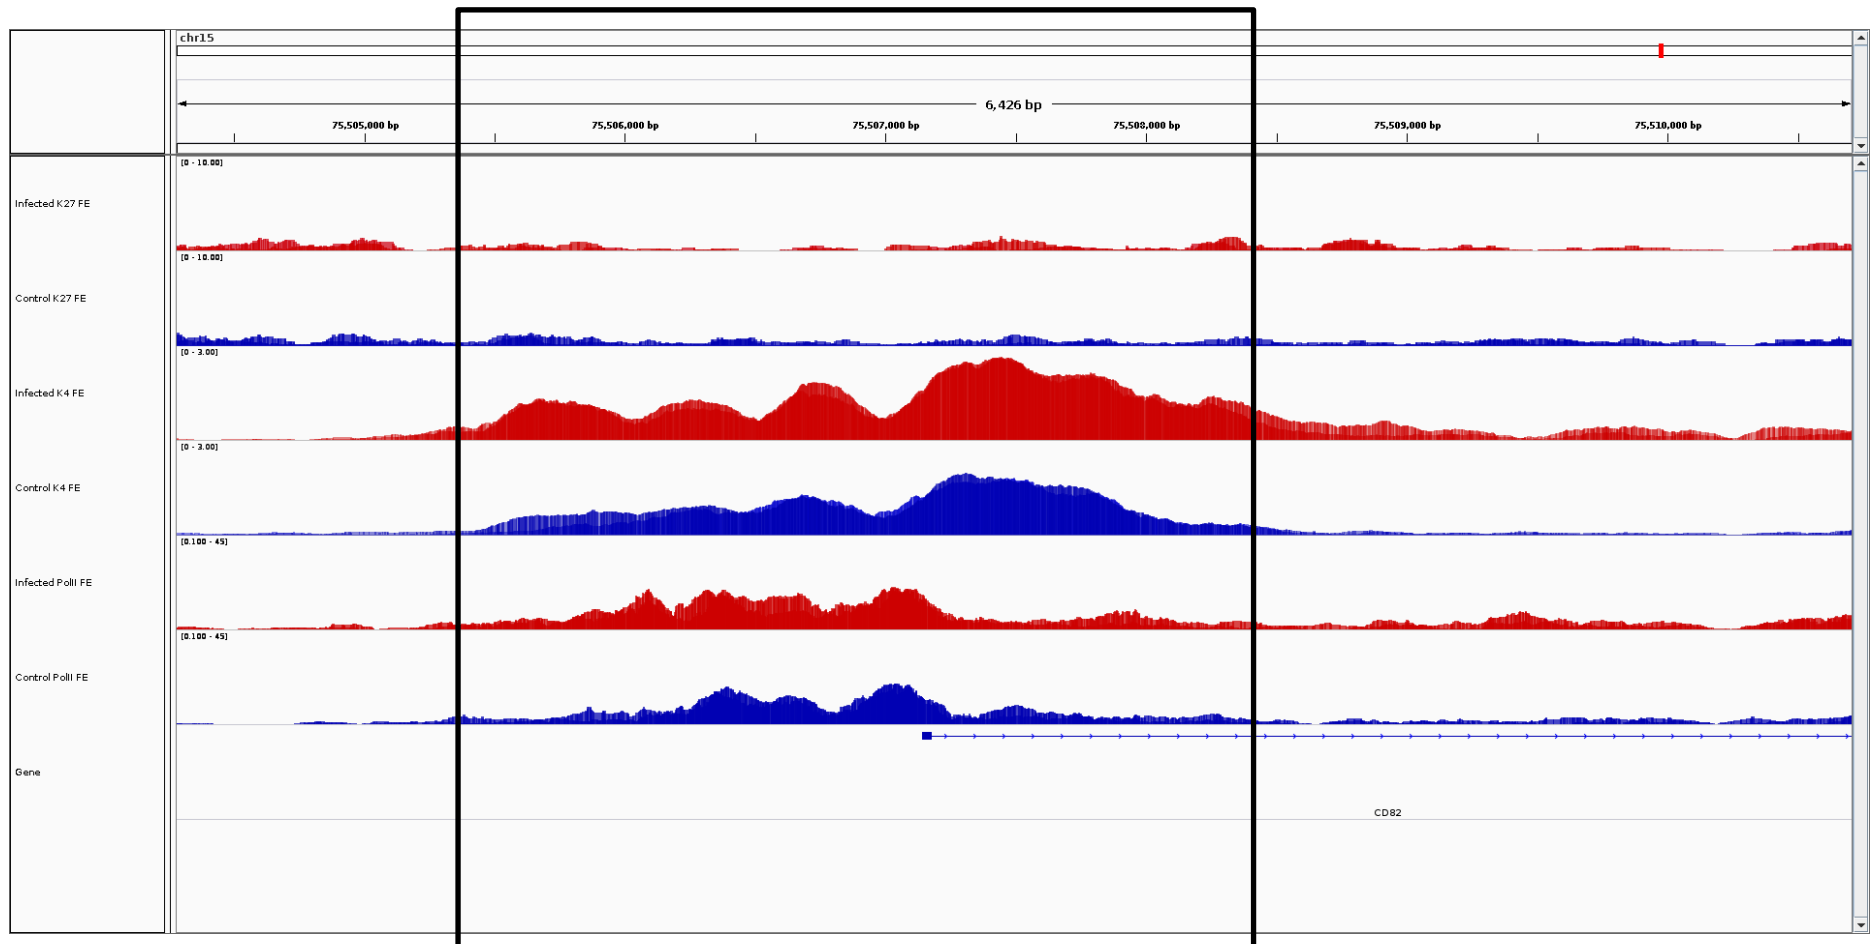

***CD82***

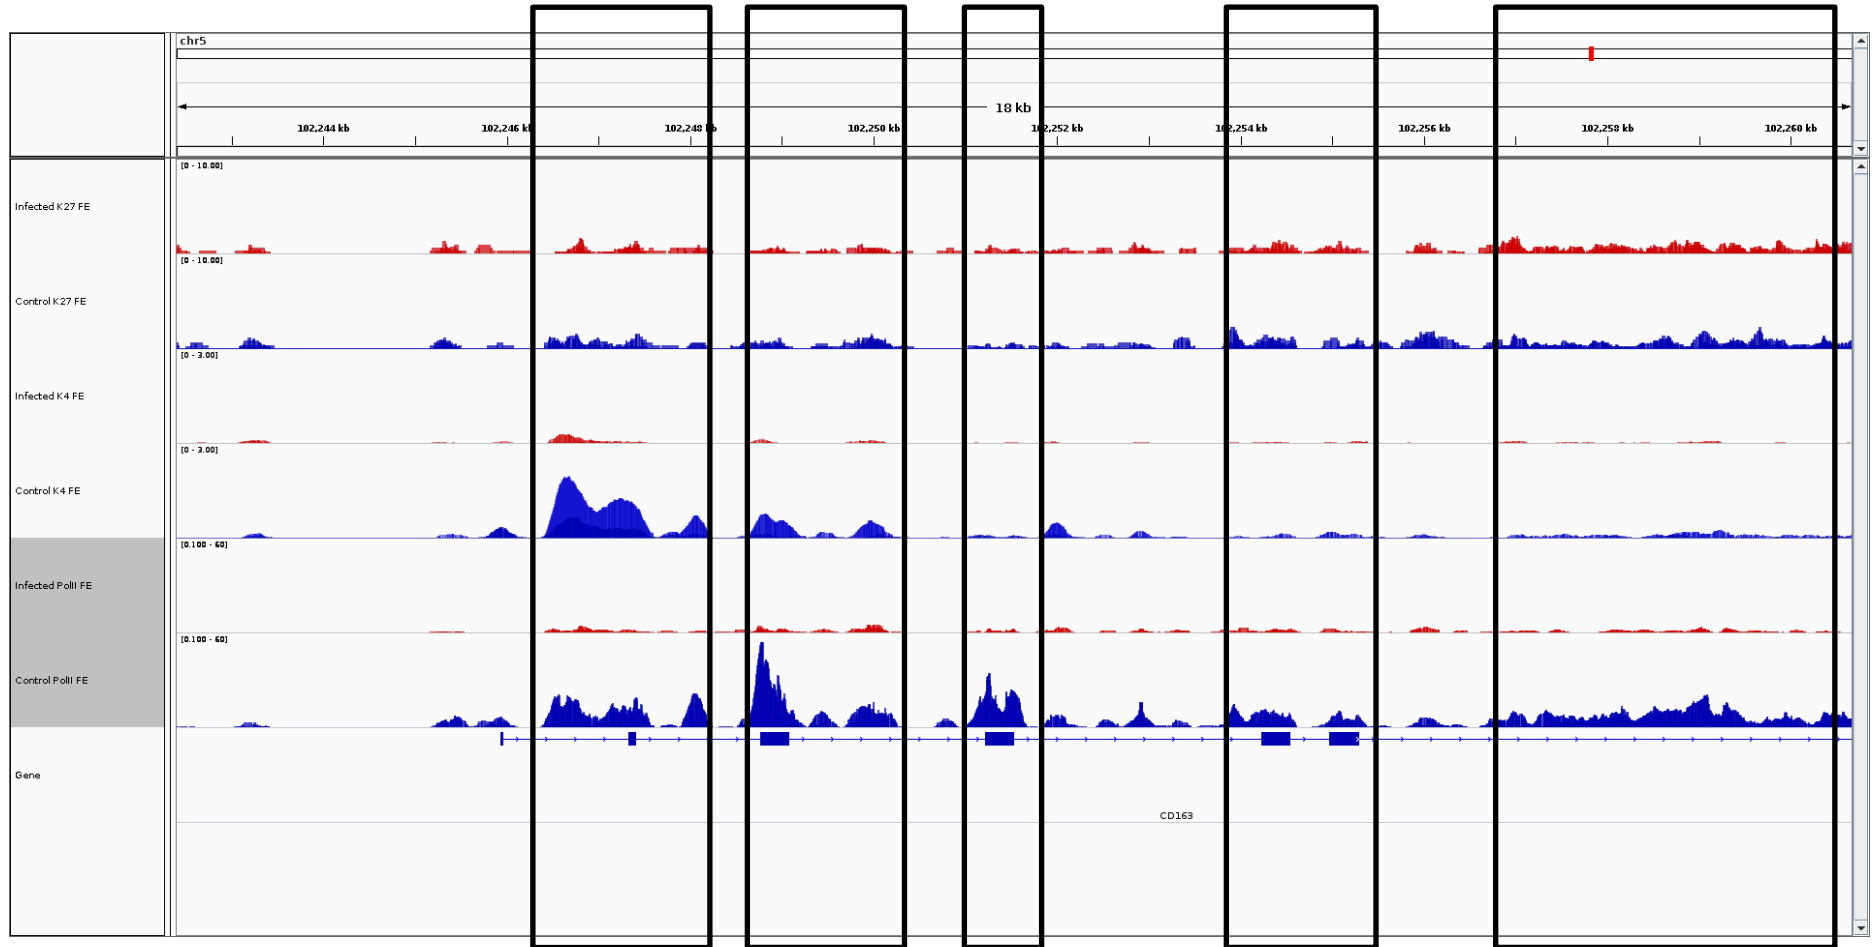

***CD163***



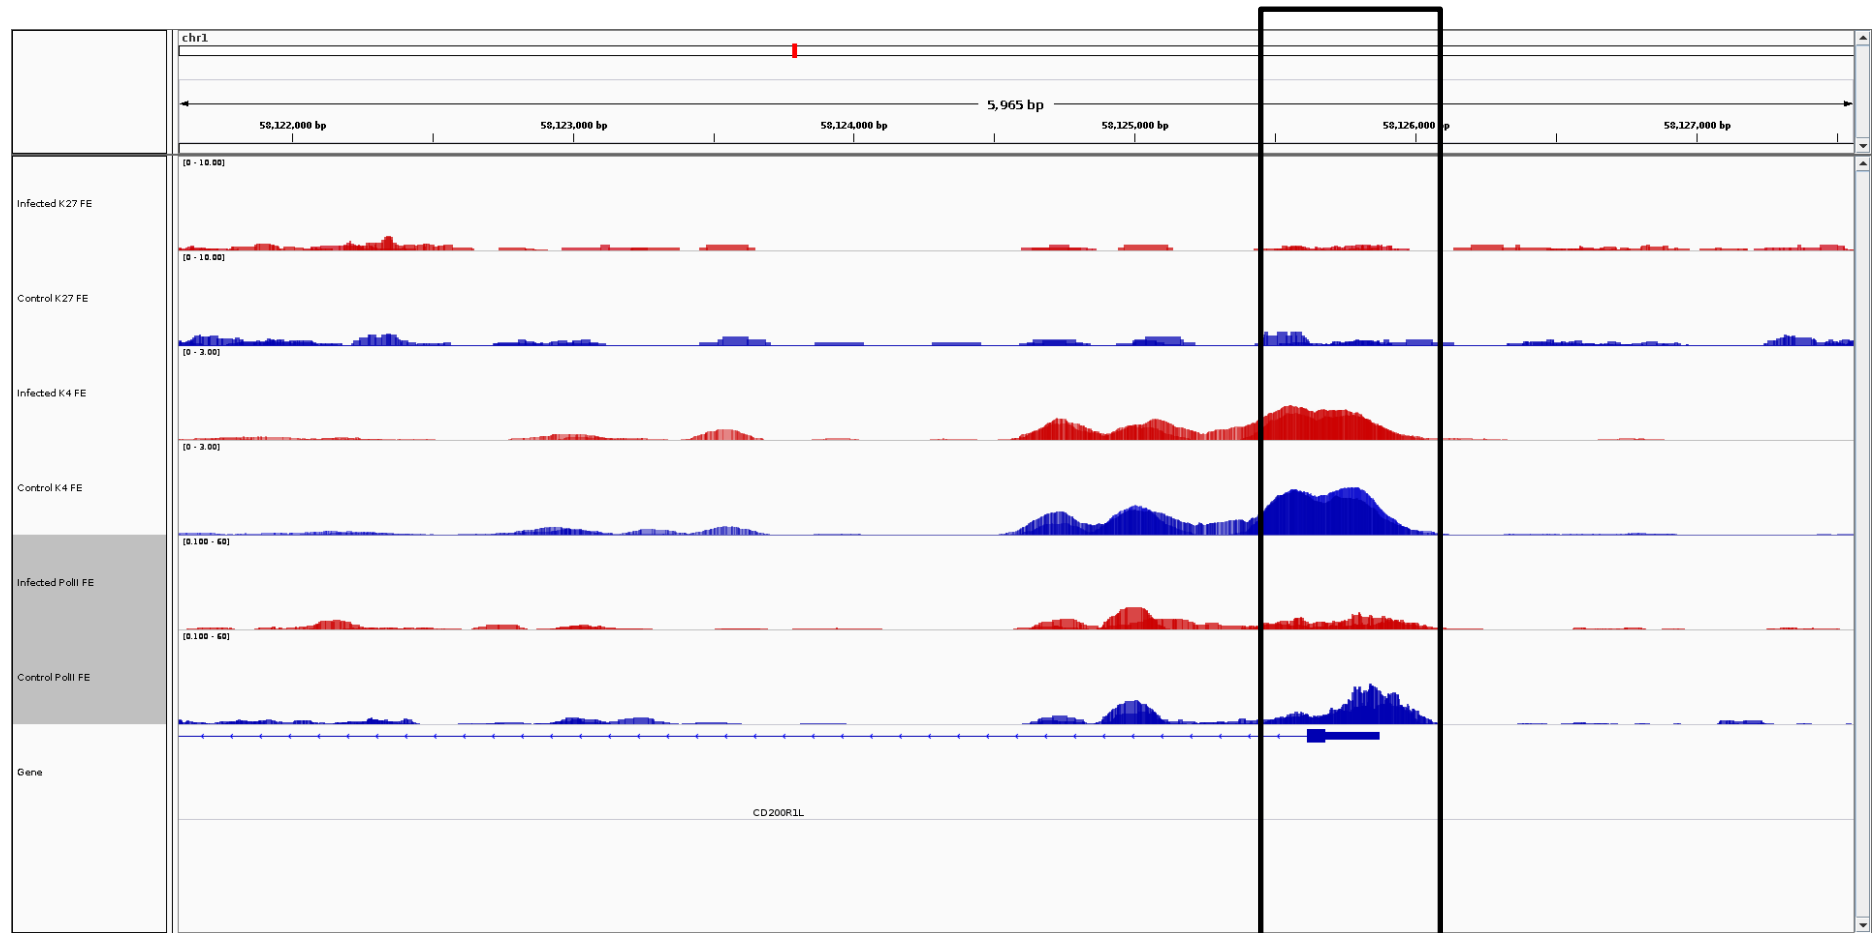

***CD200R1L***

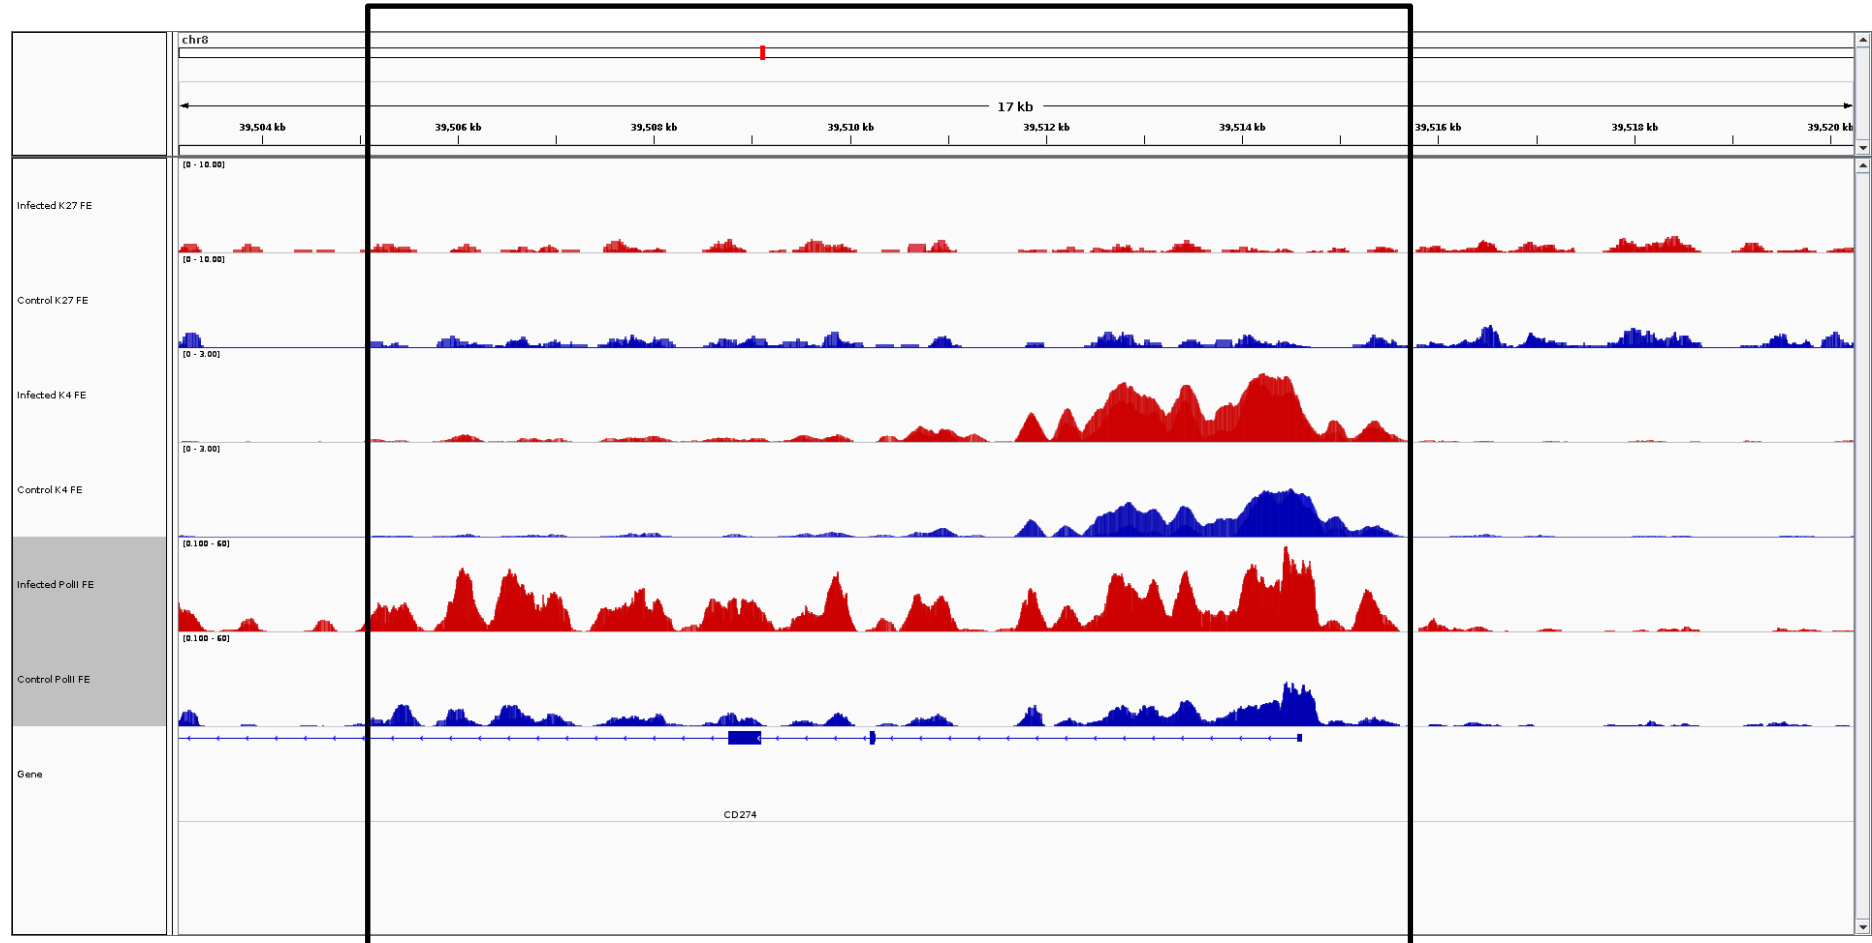

***CD274***

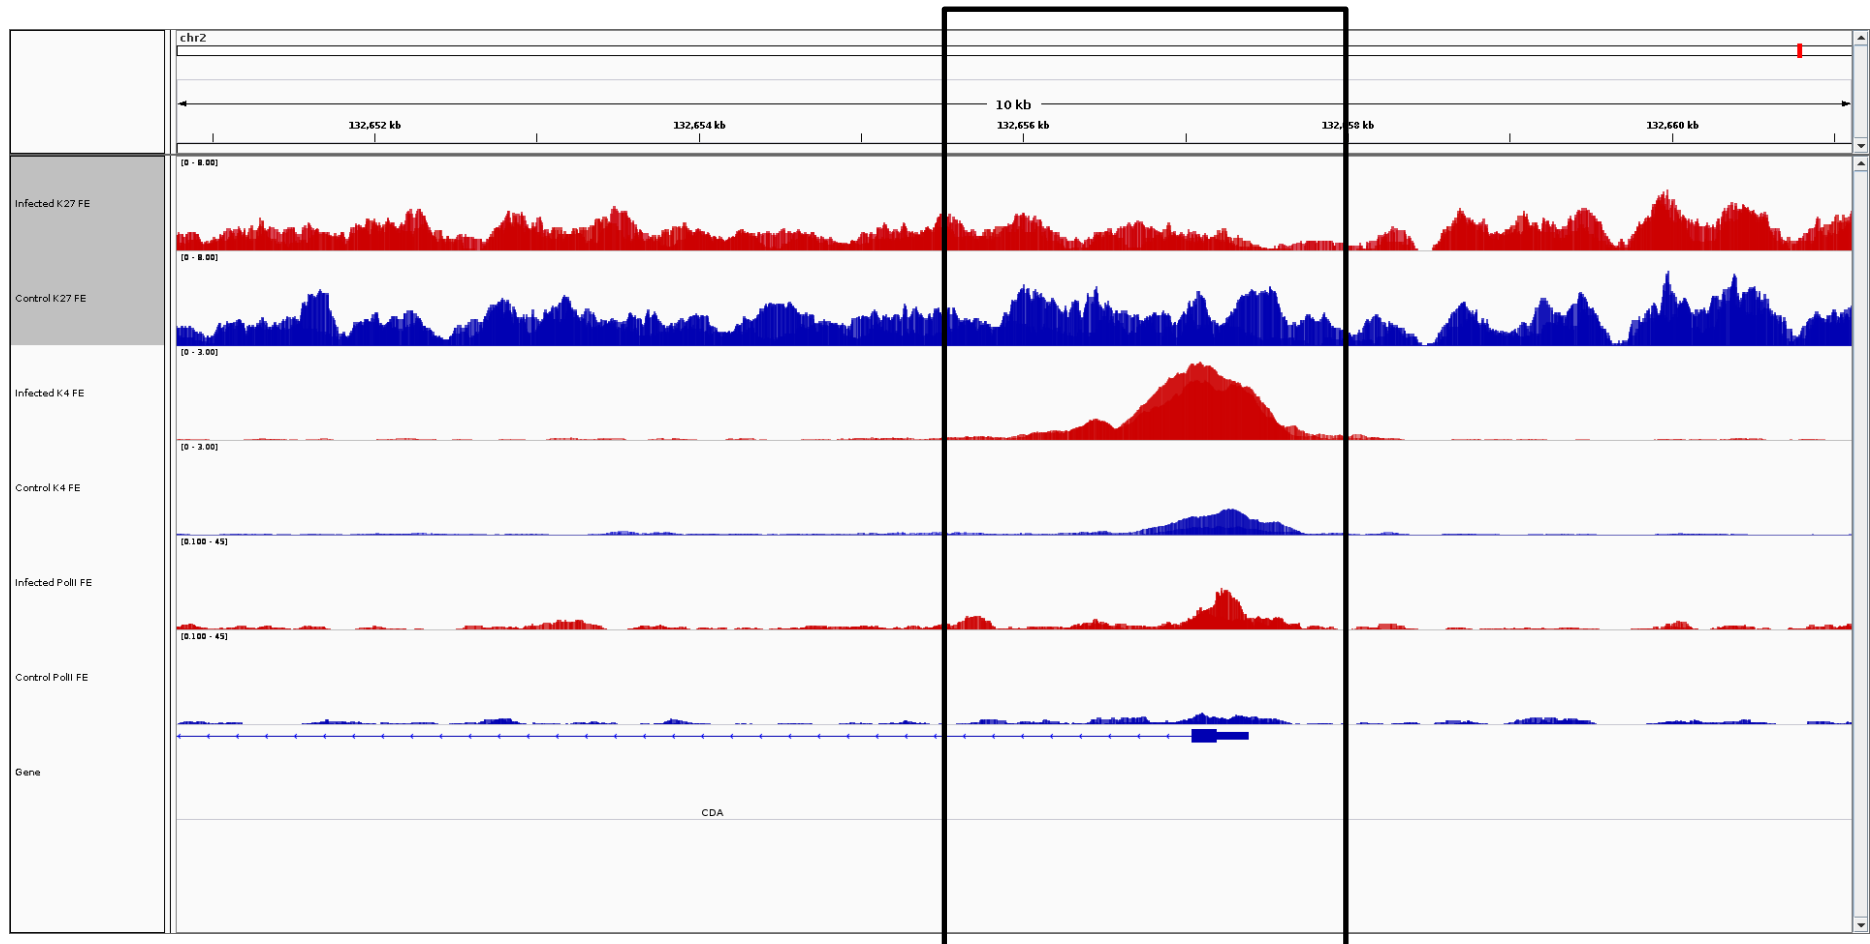

*CDA*

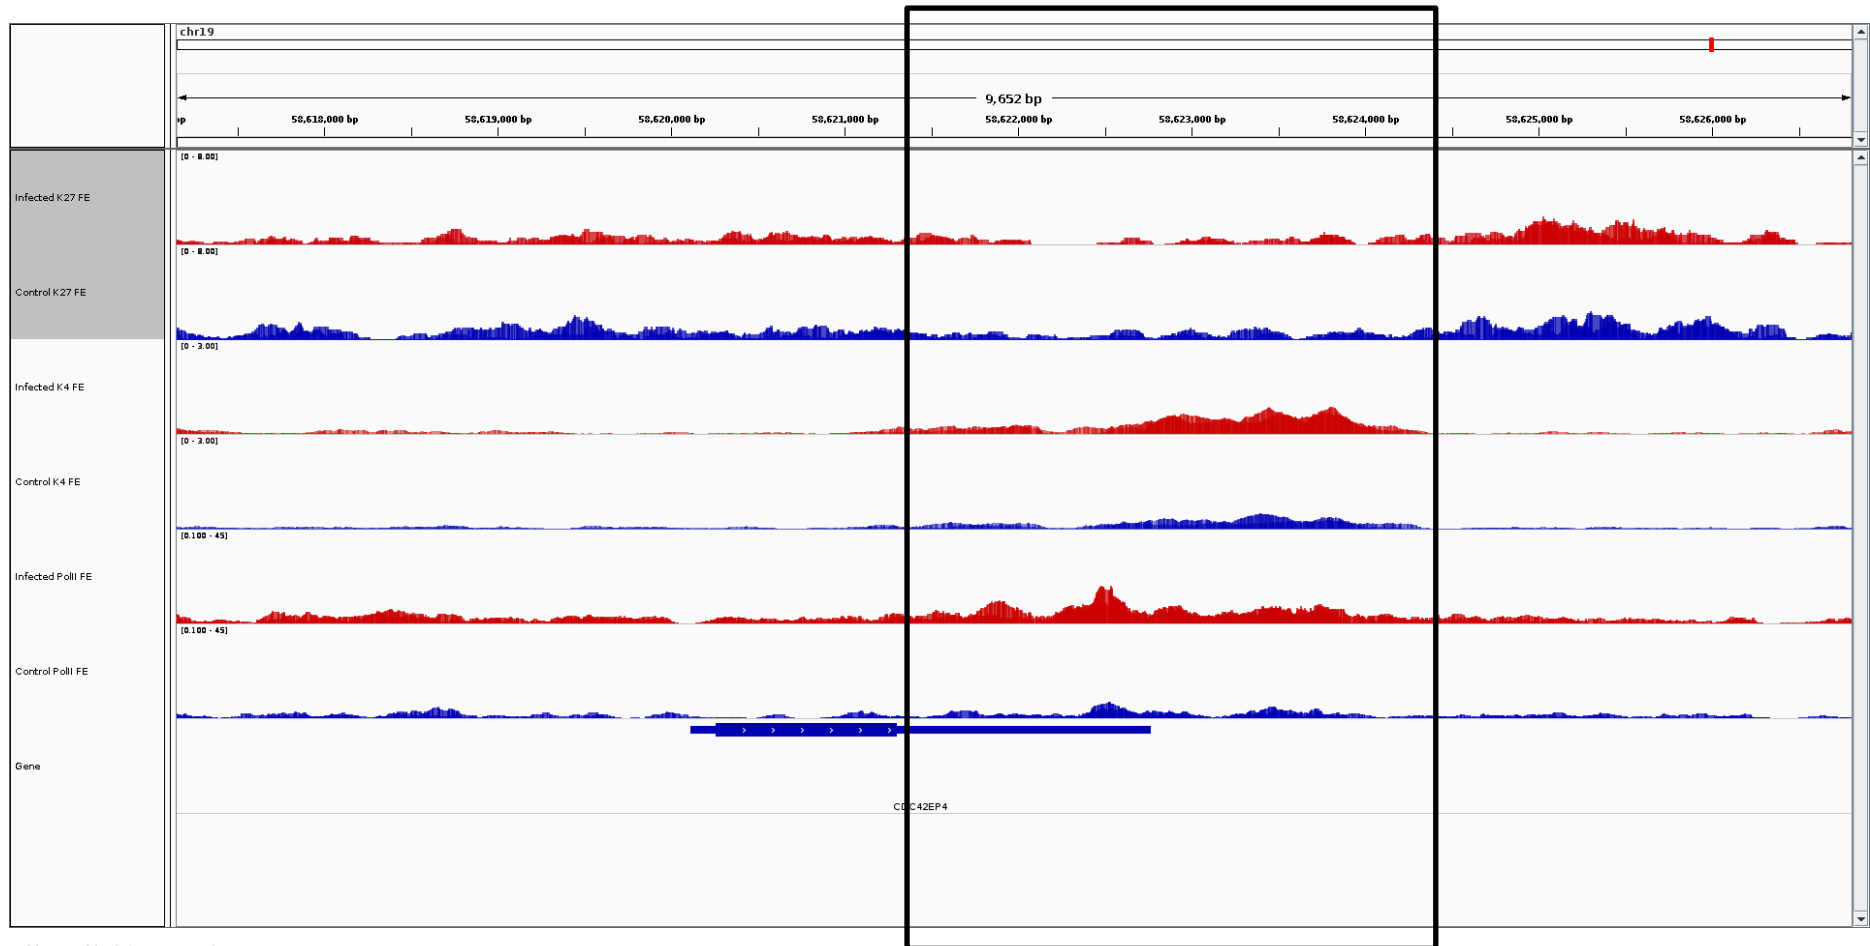

***CDC42EP4***

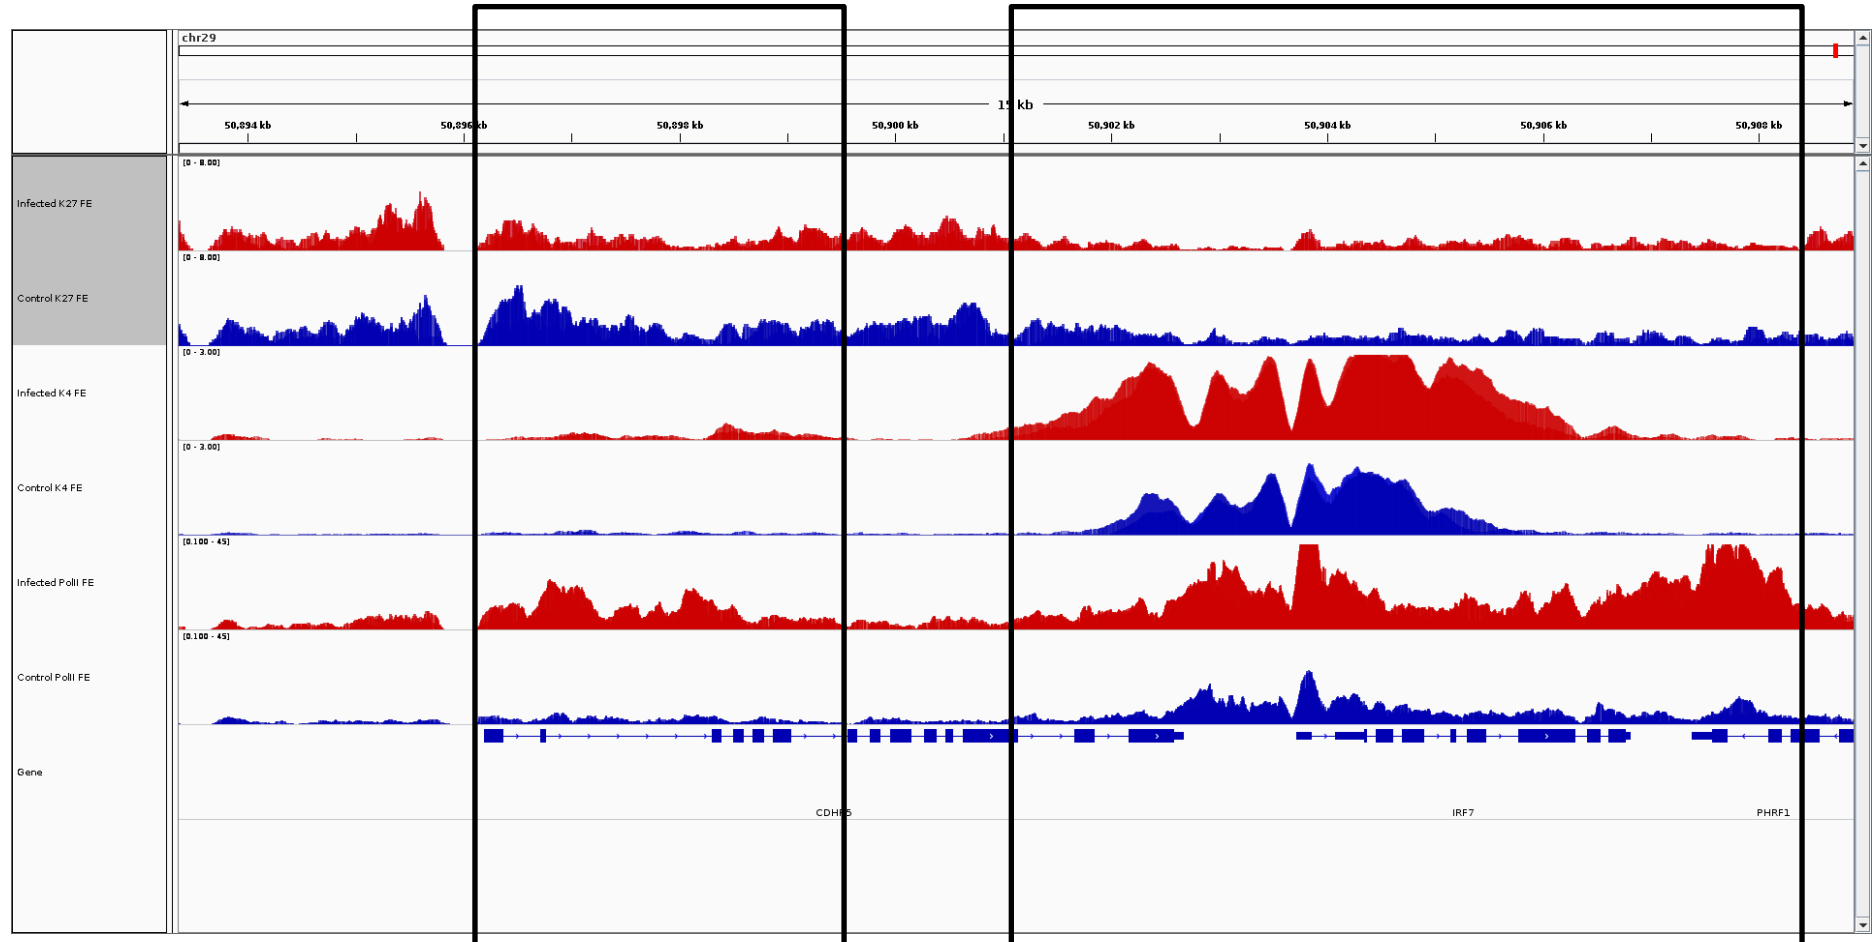

***CDHR5***

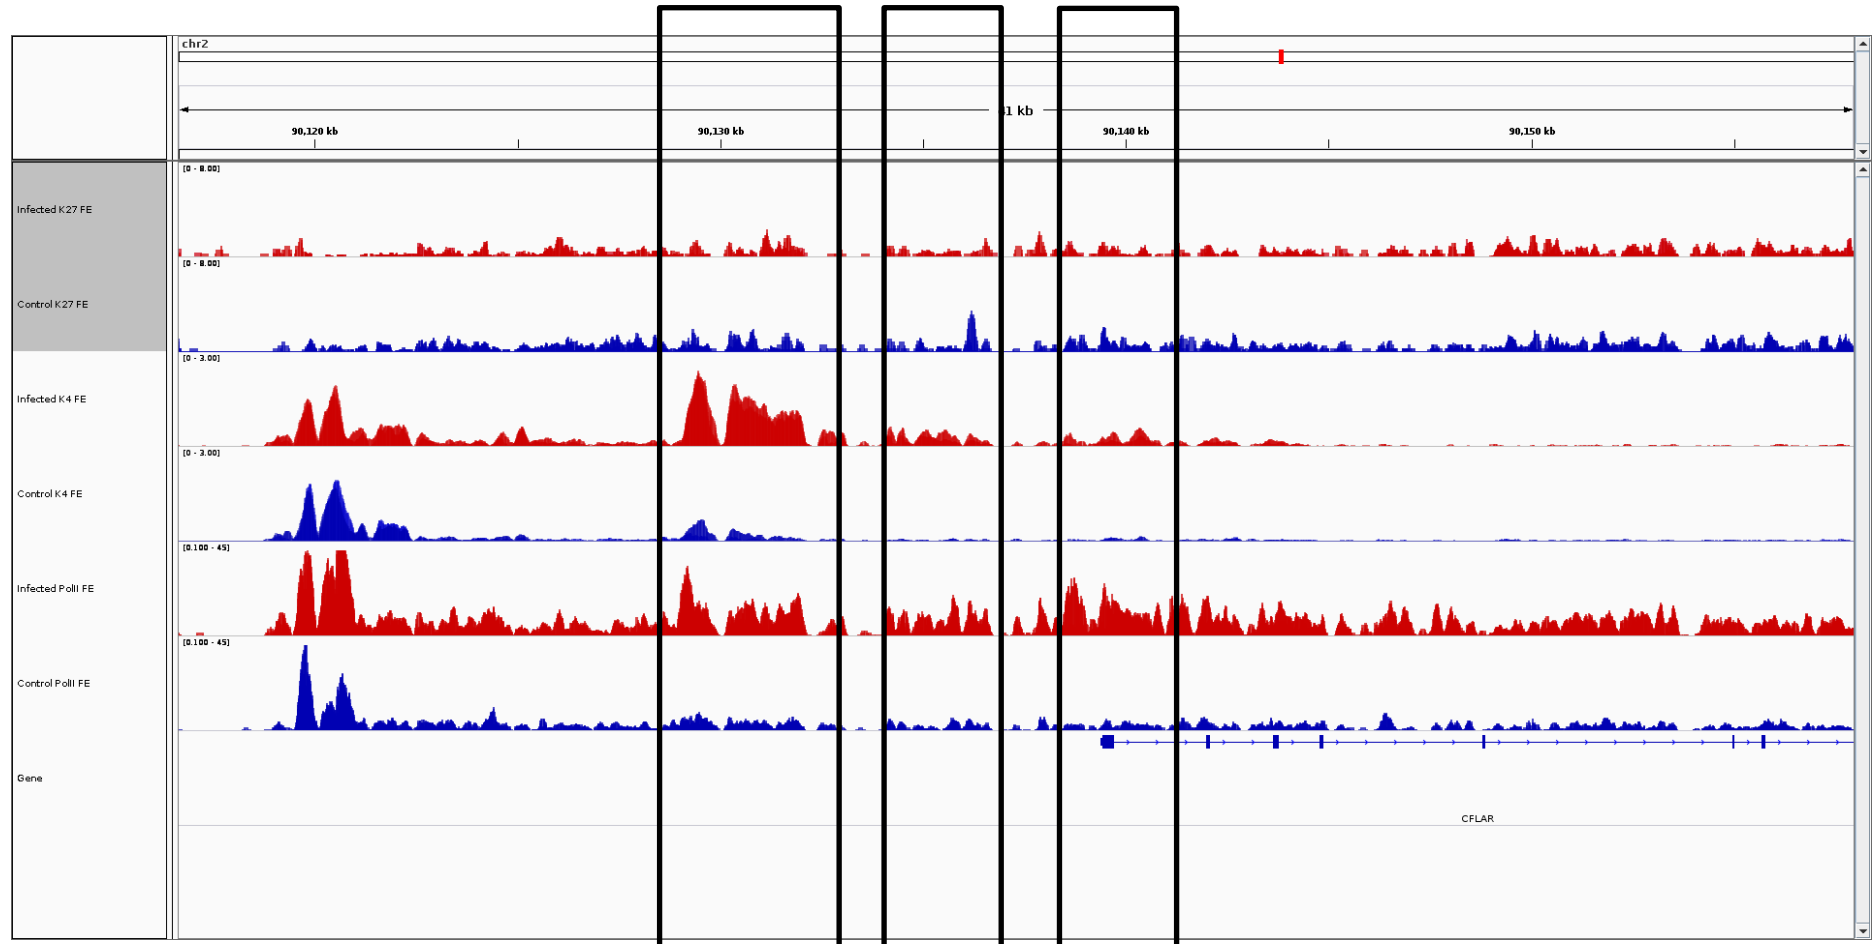

***CFLAR***

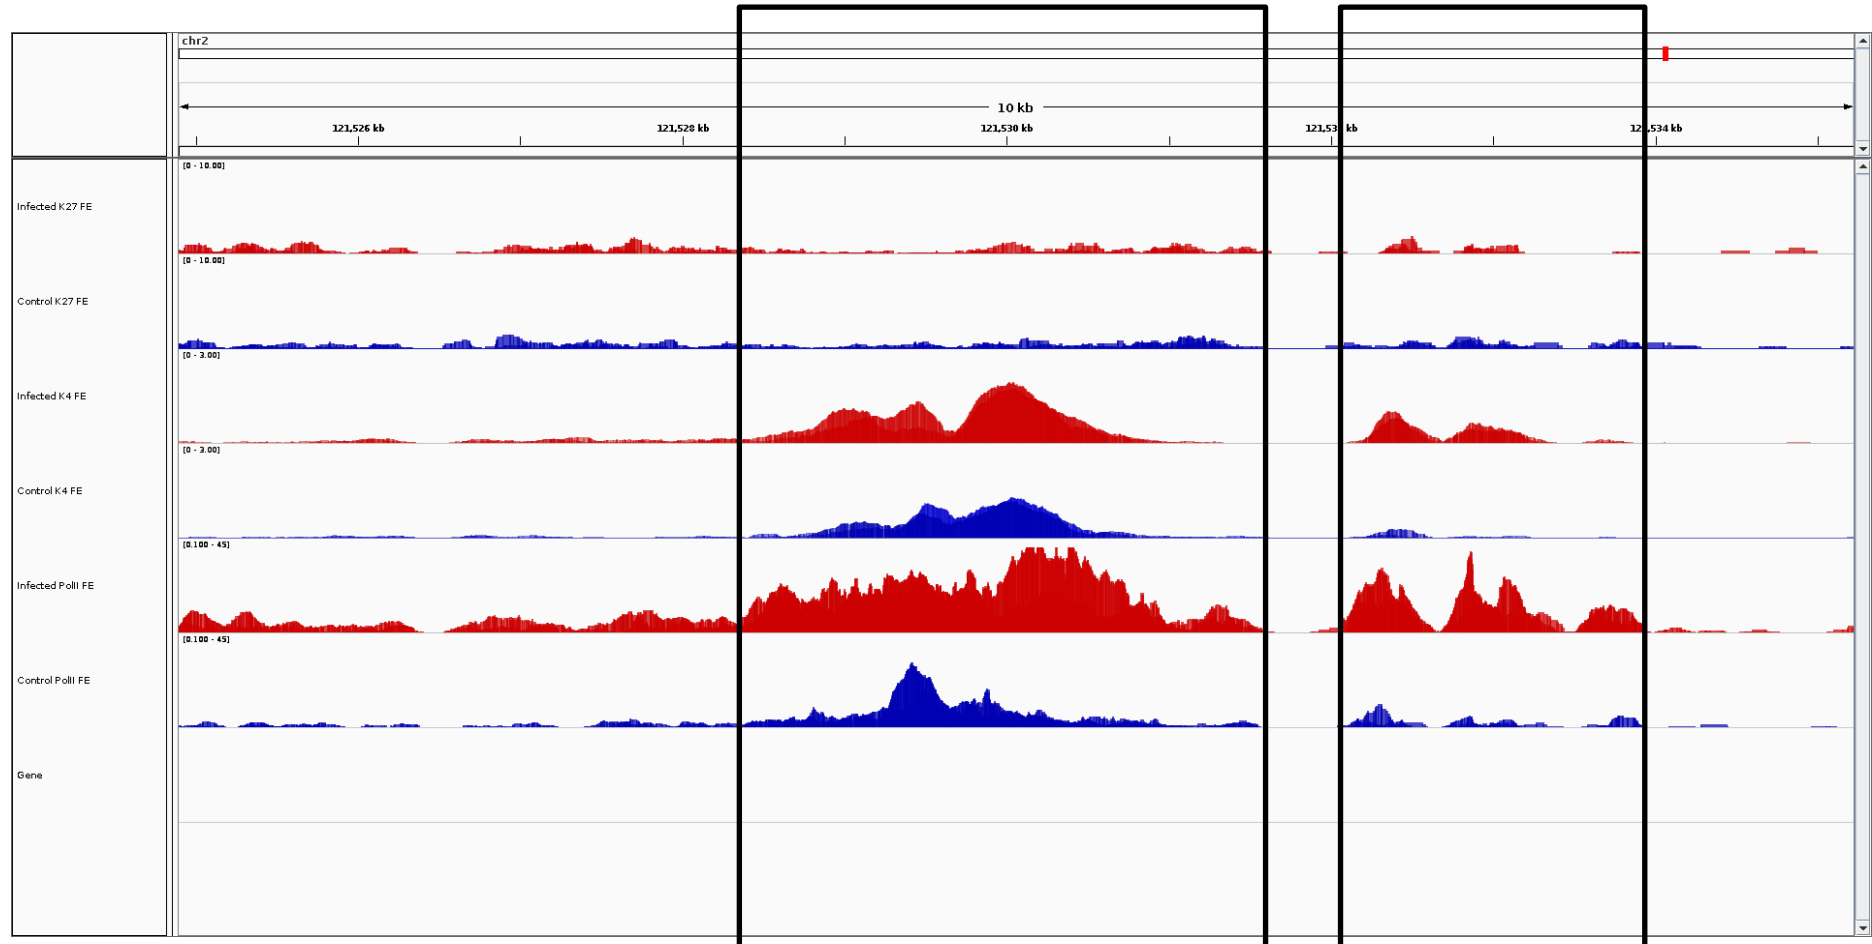

**chr2 121,524,892 – 121,535,228**

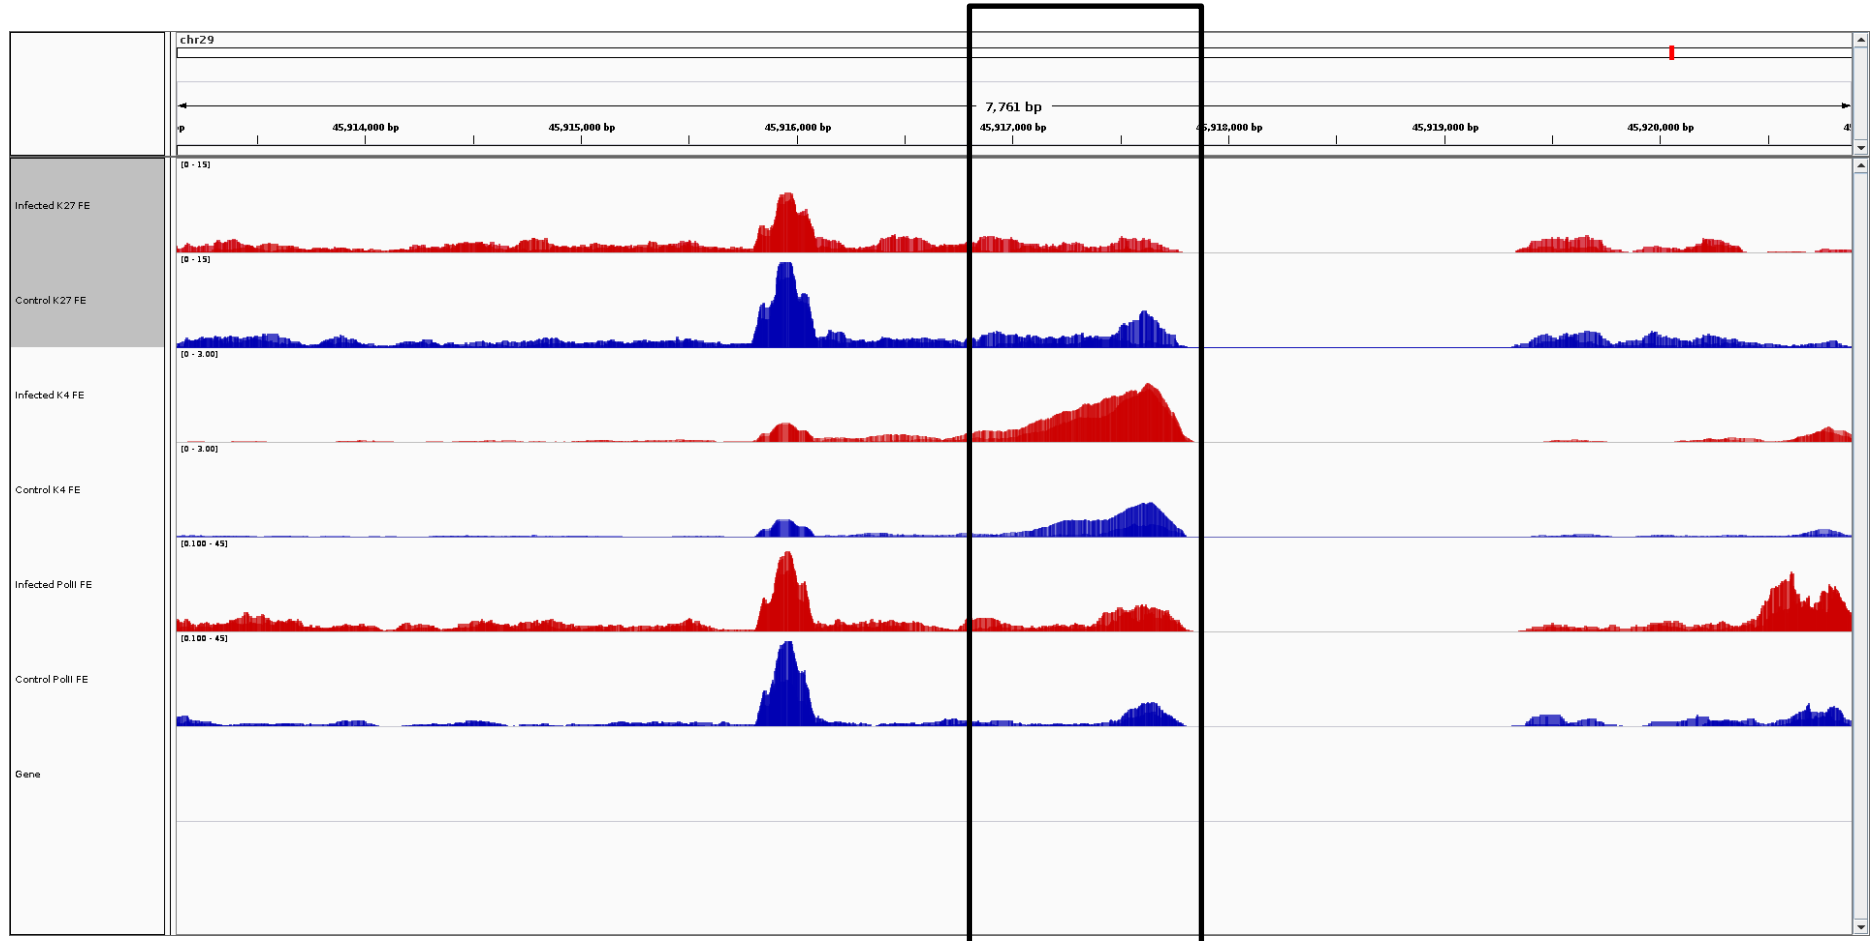

*CLCF1*



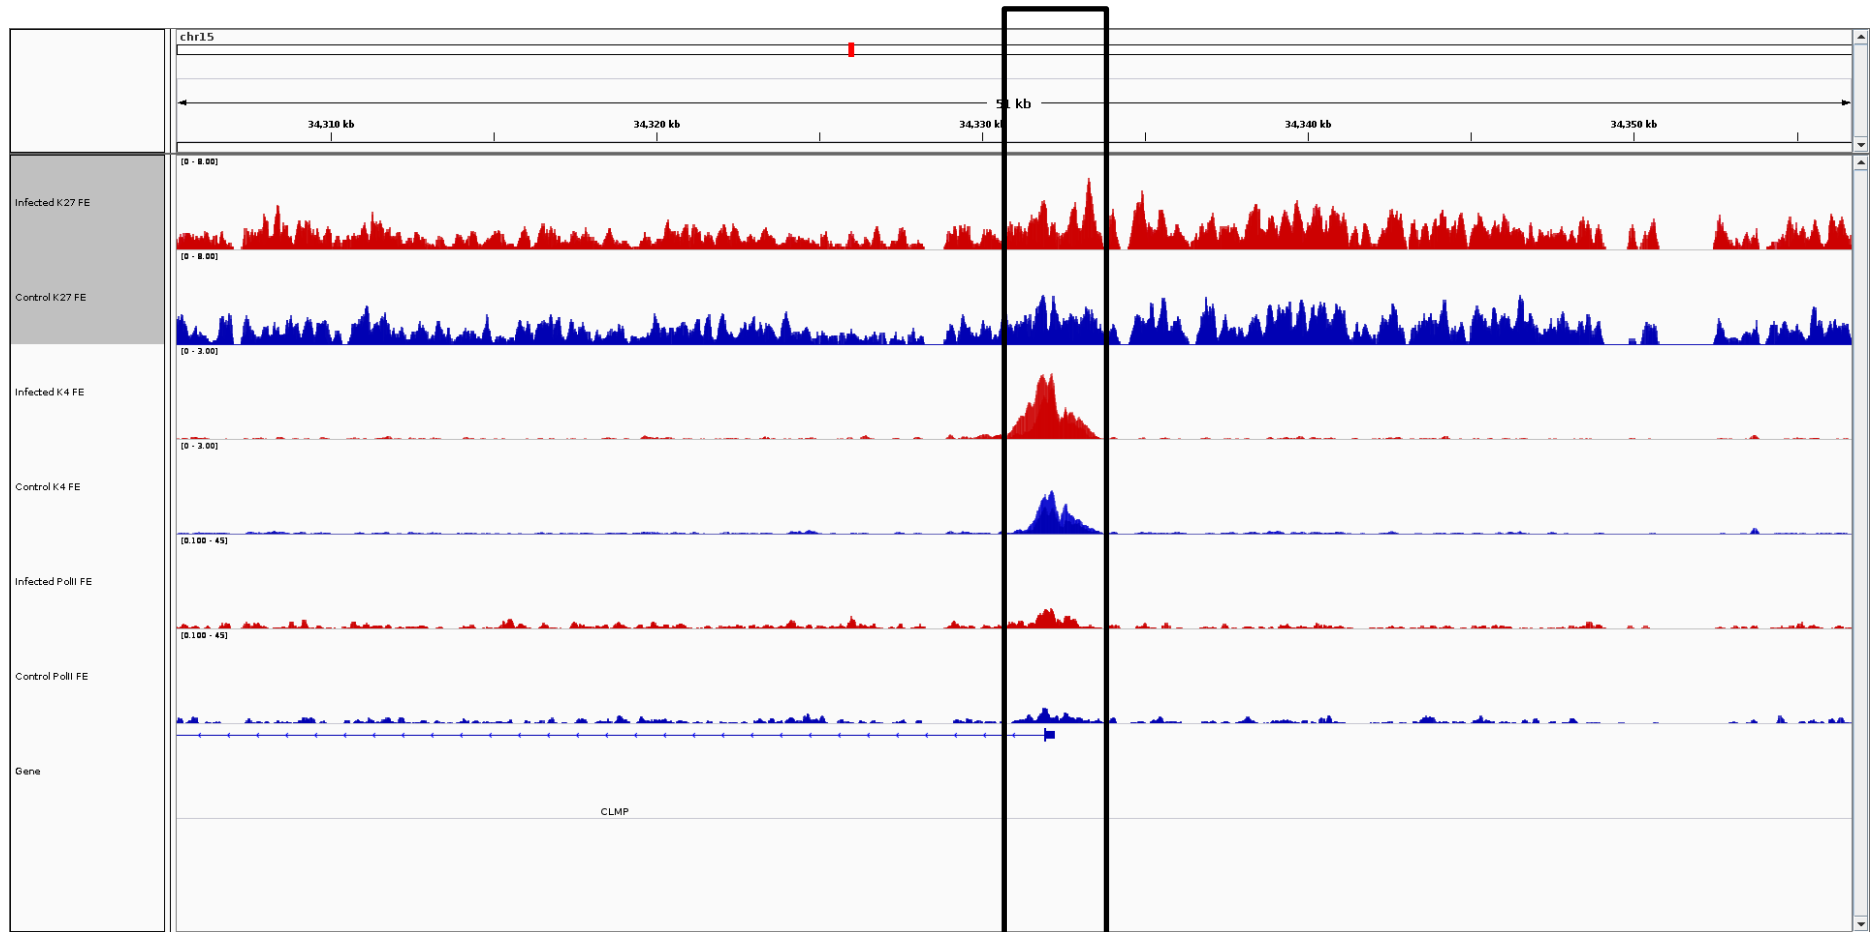

***CLMP***

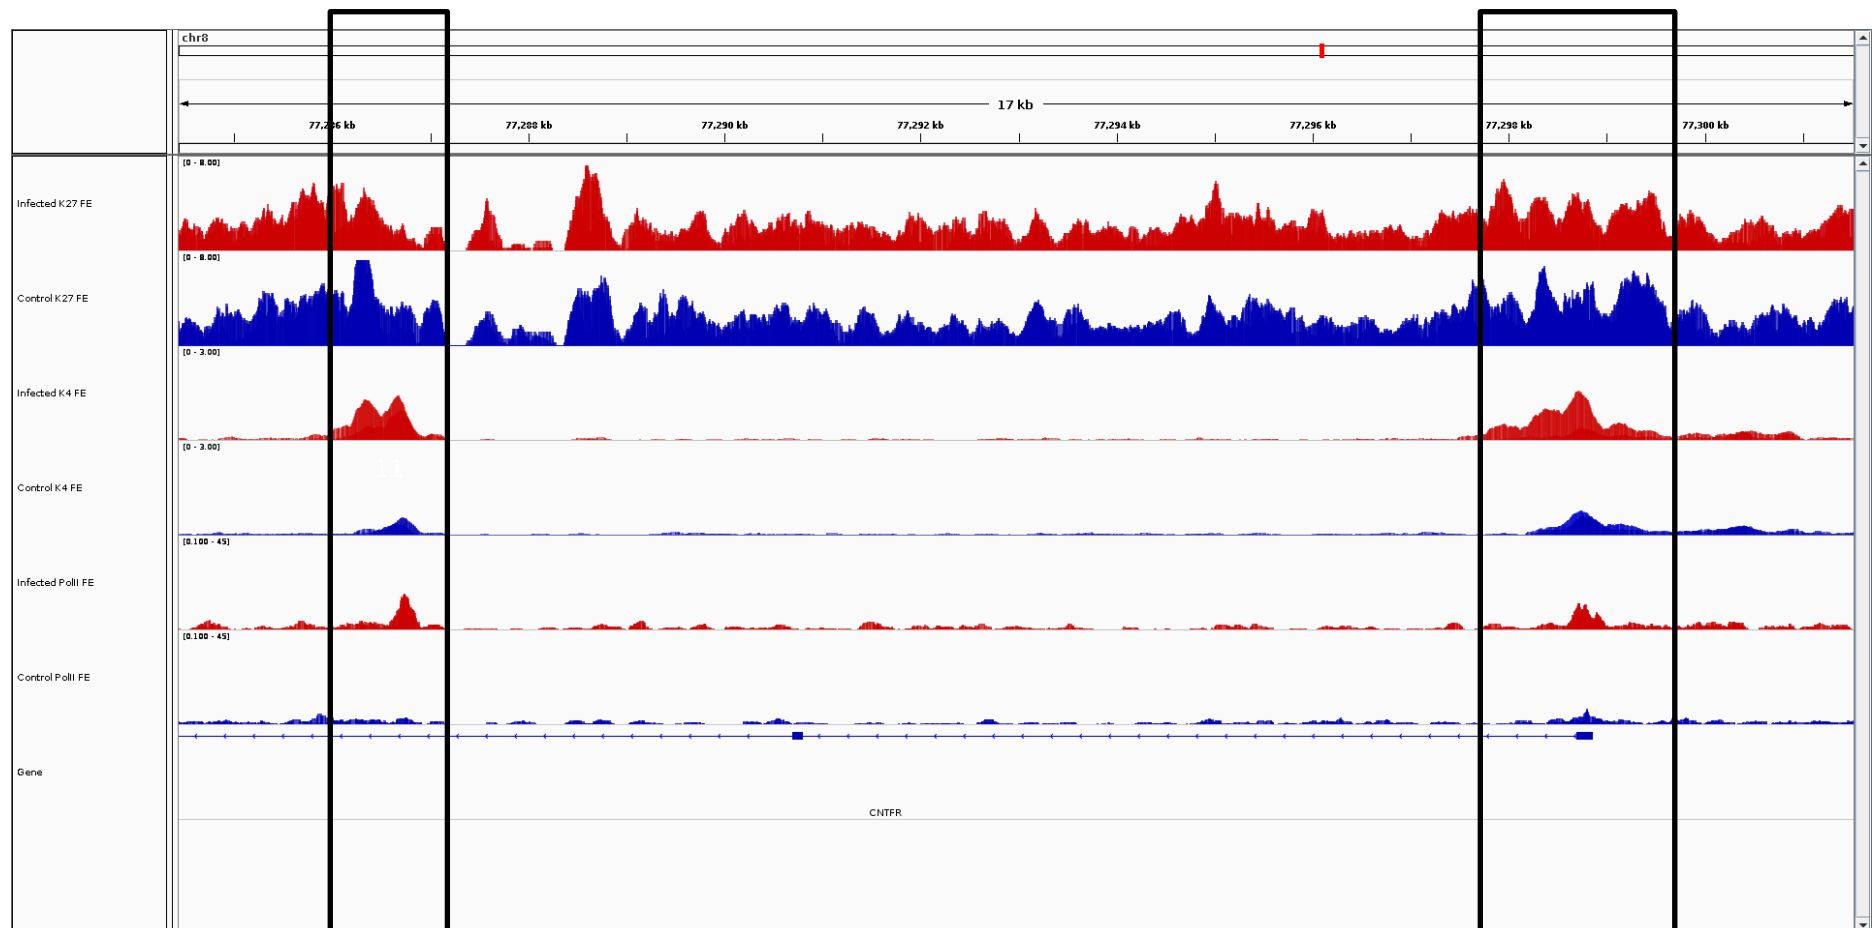

***CNTFR***

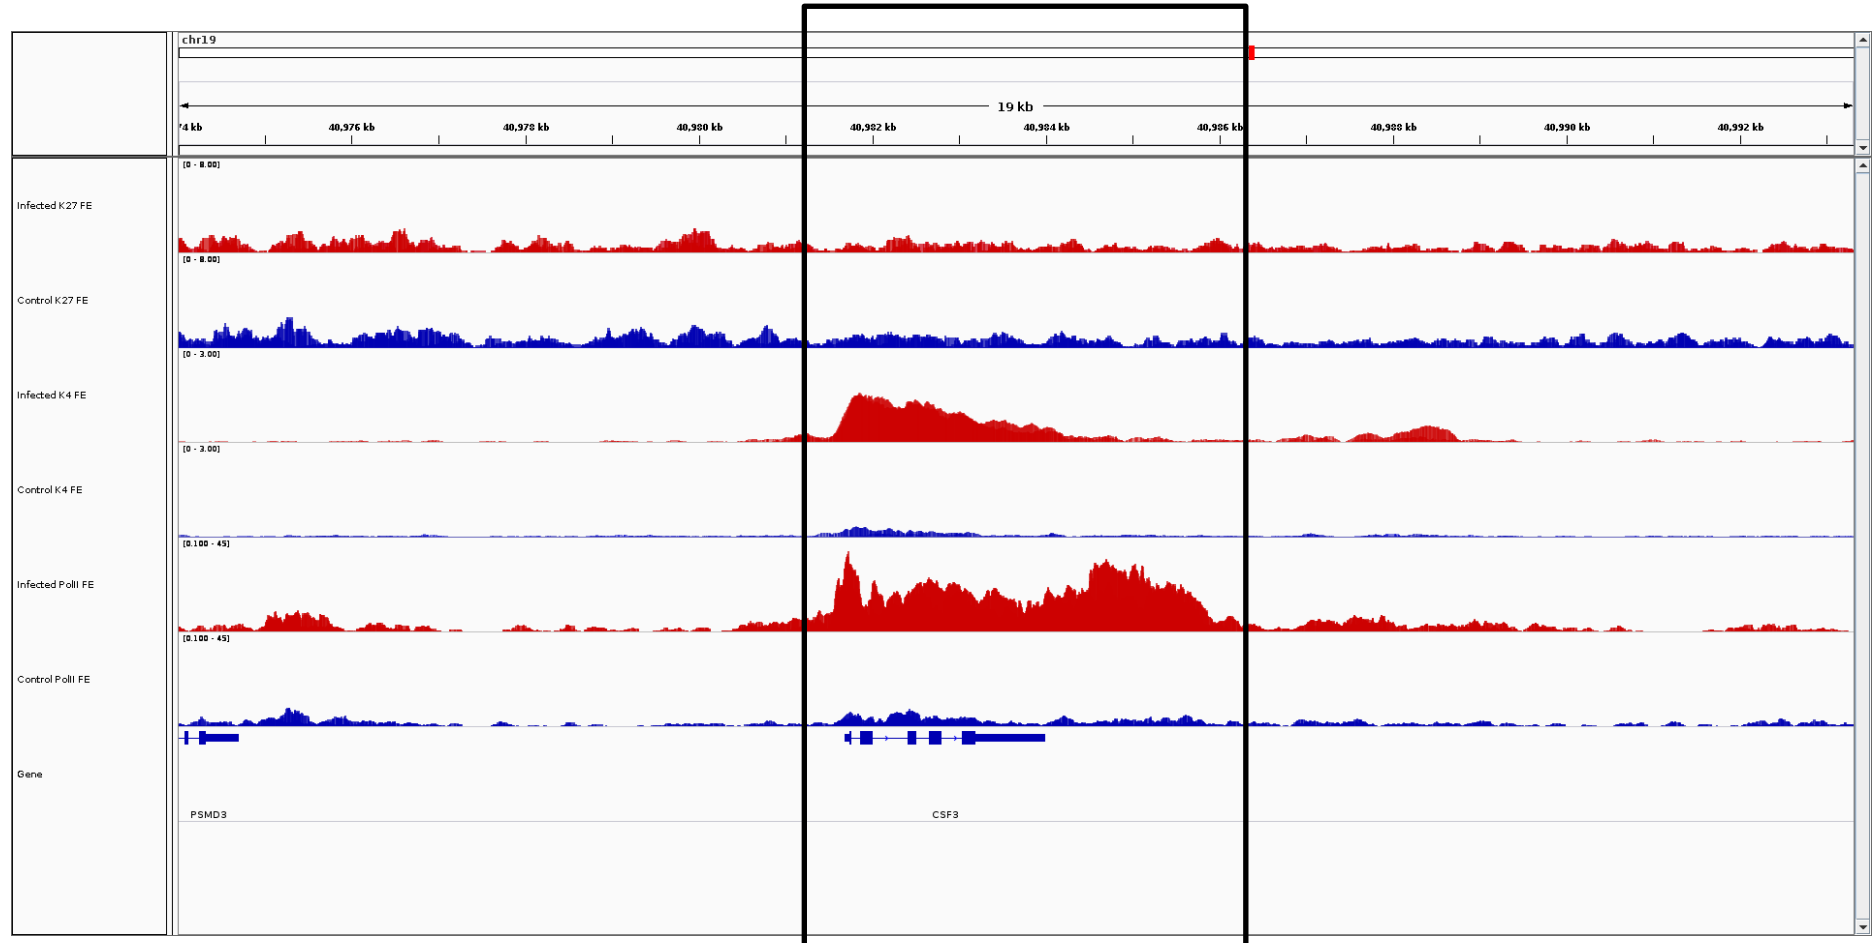

***CSF3***

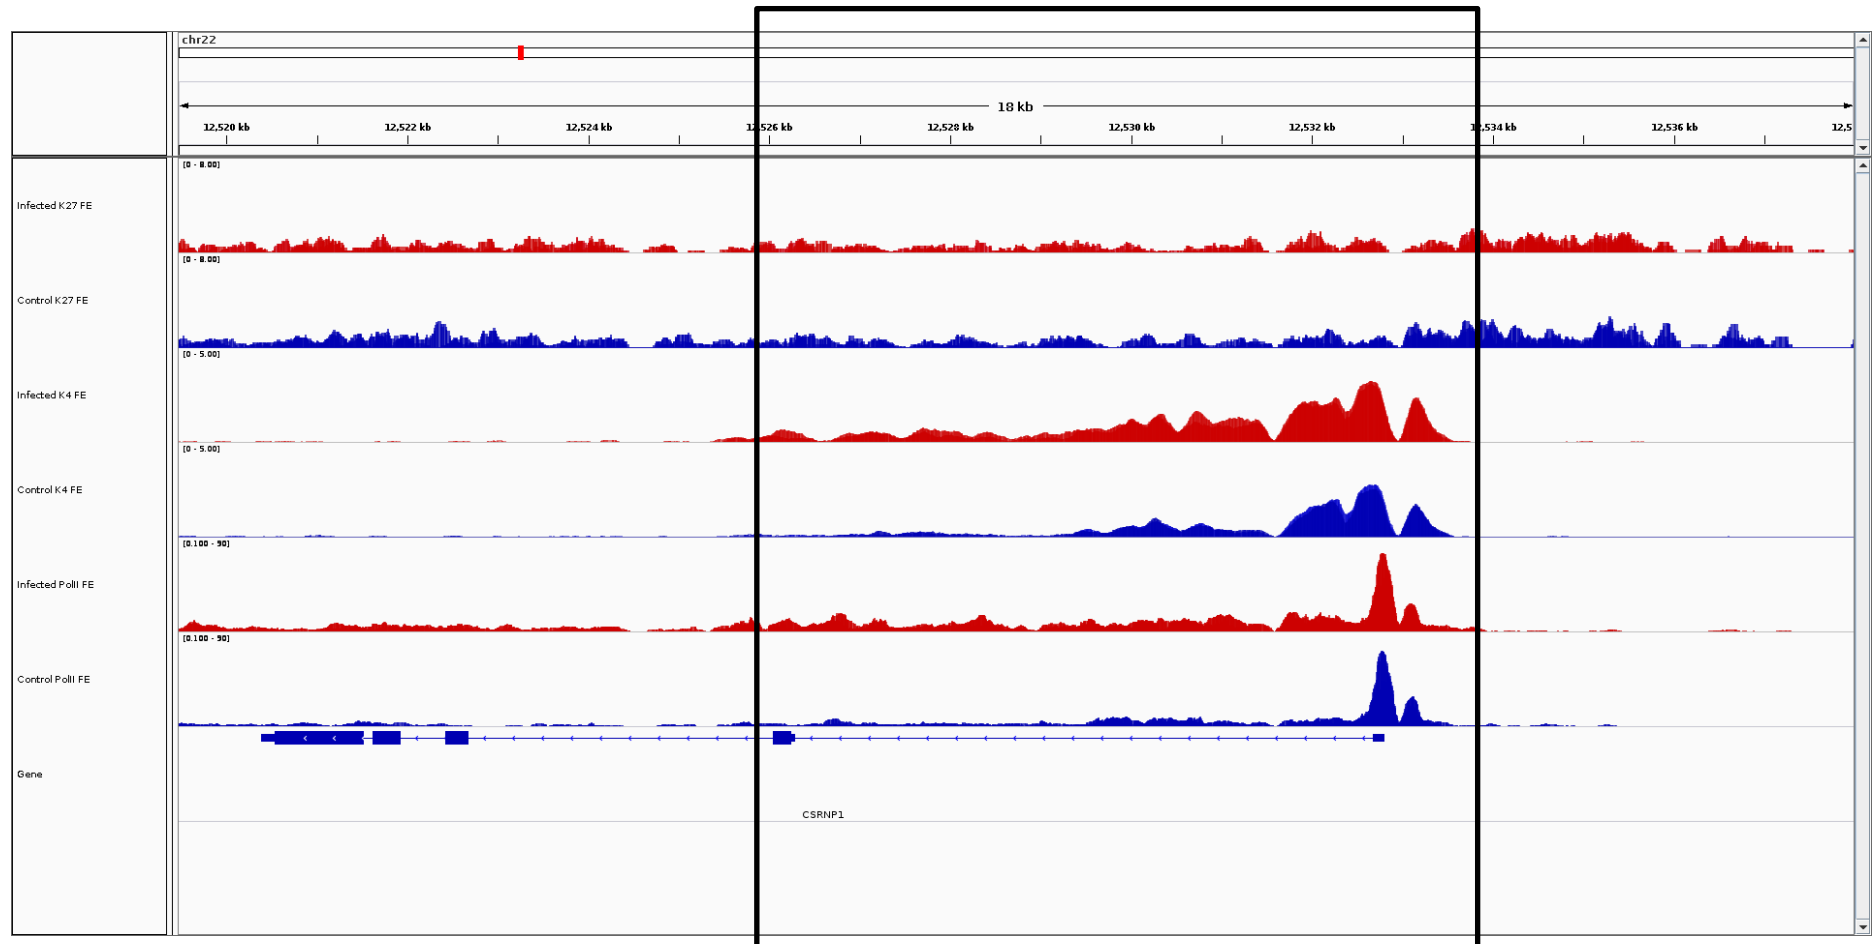

***CSRNP1***

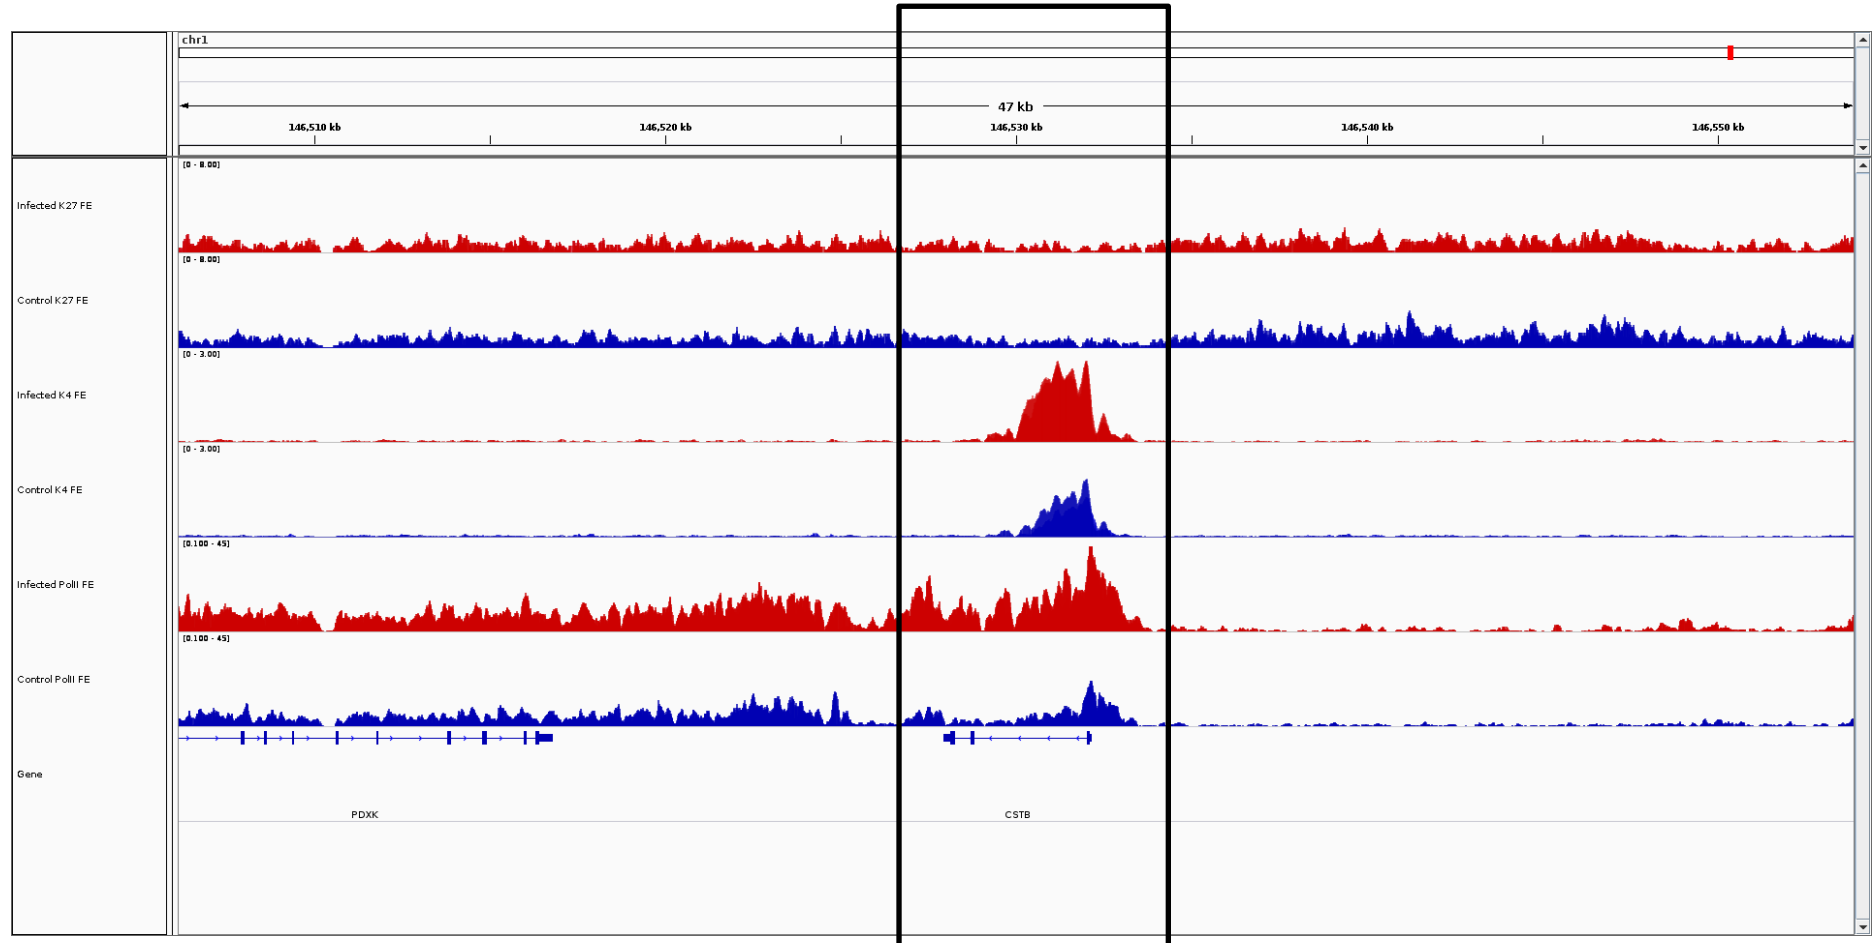

***CSTB***

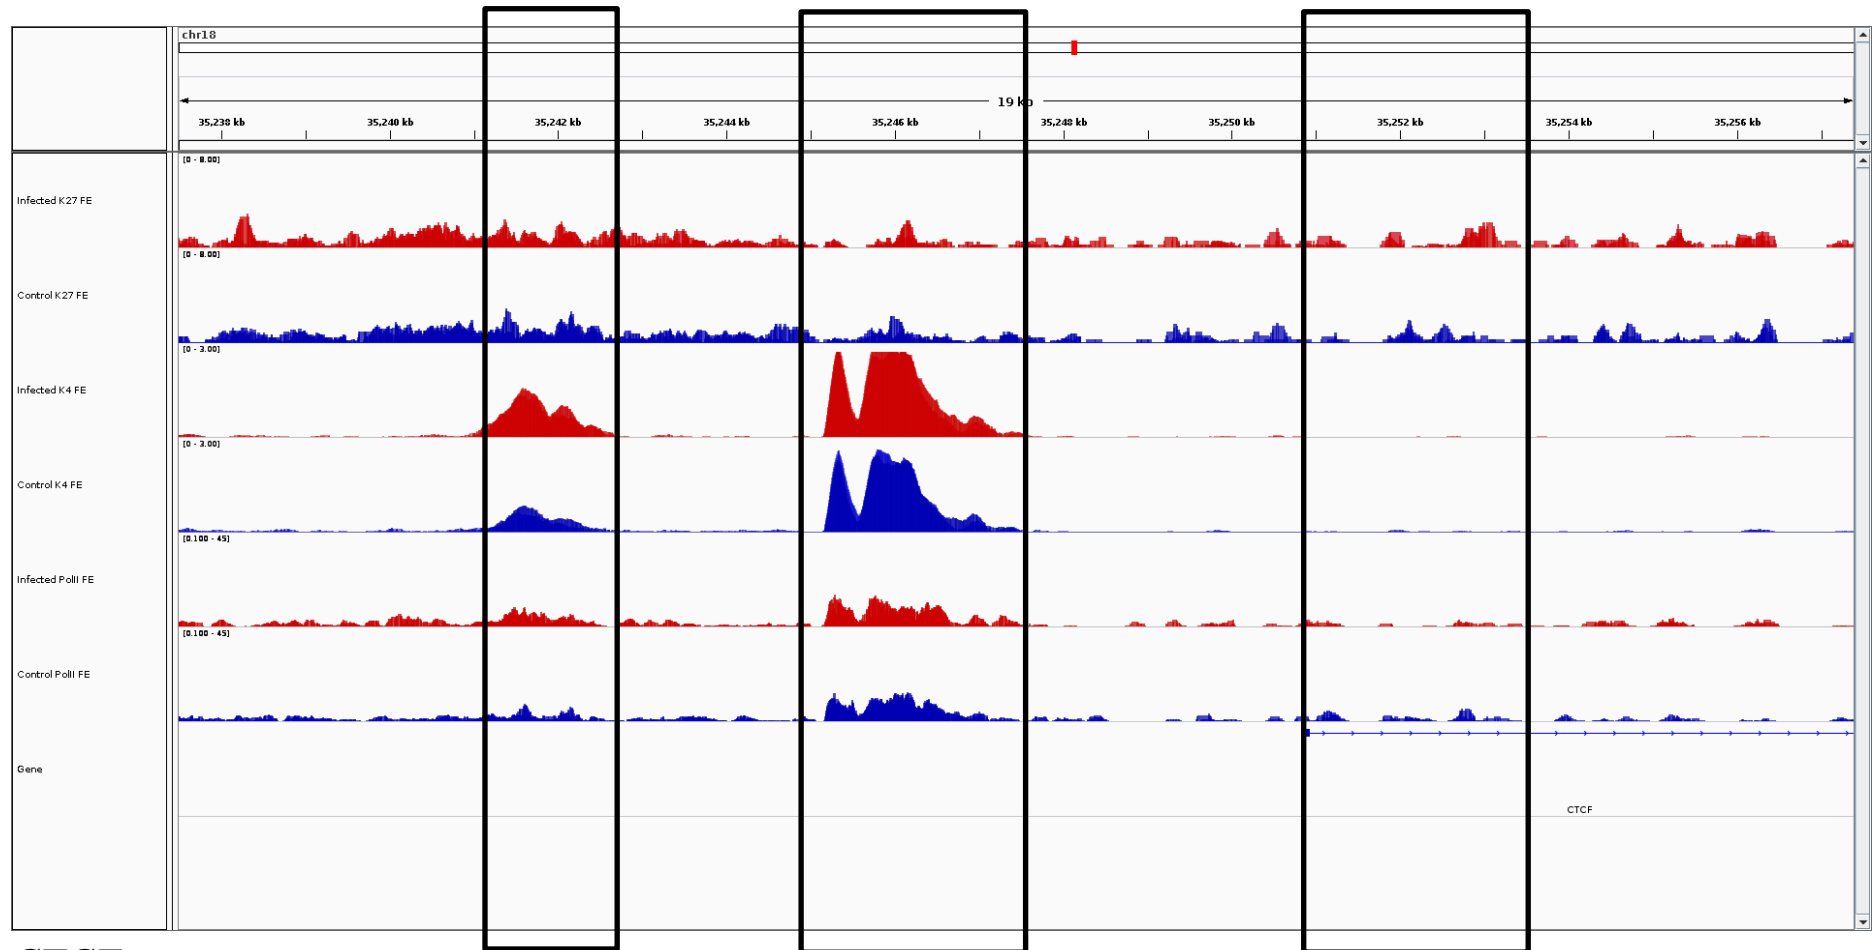

***CTCF***

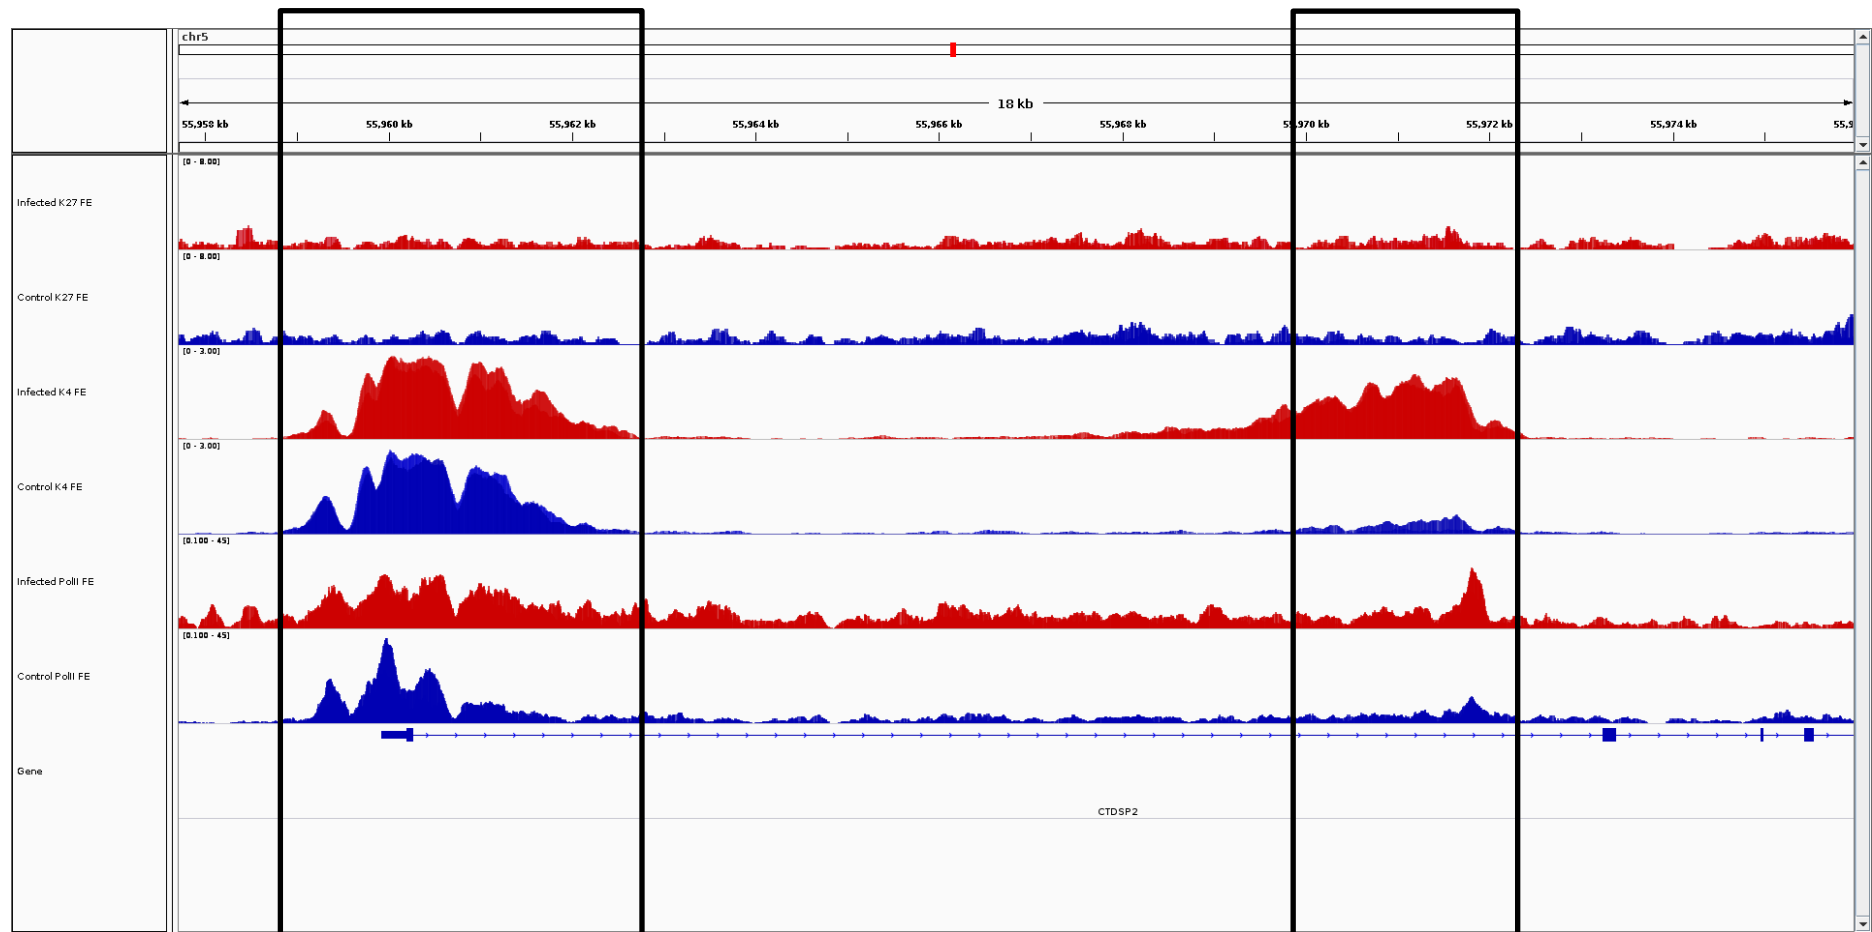

*ctdsp2*

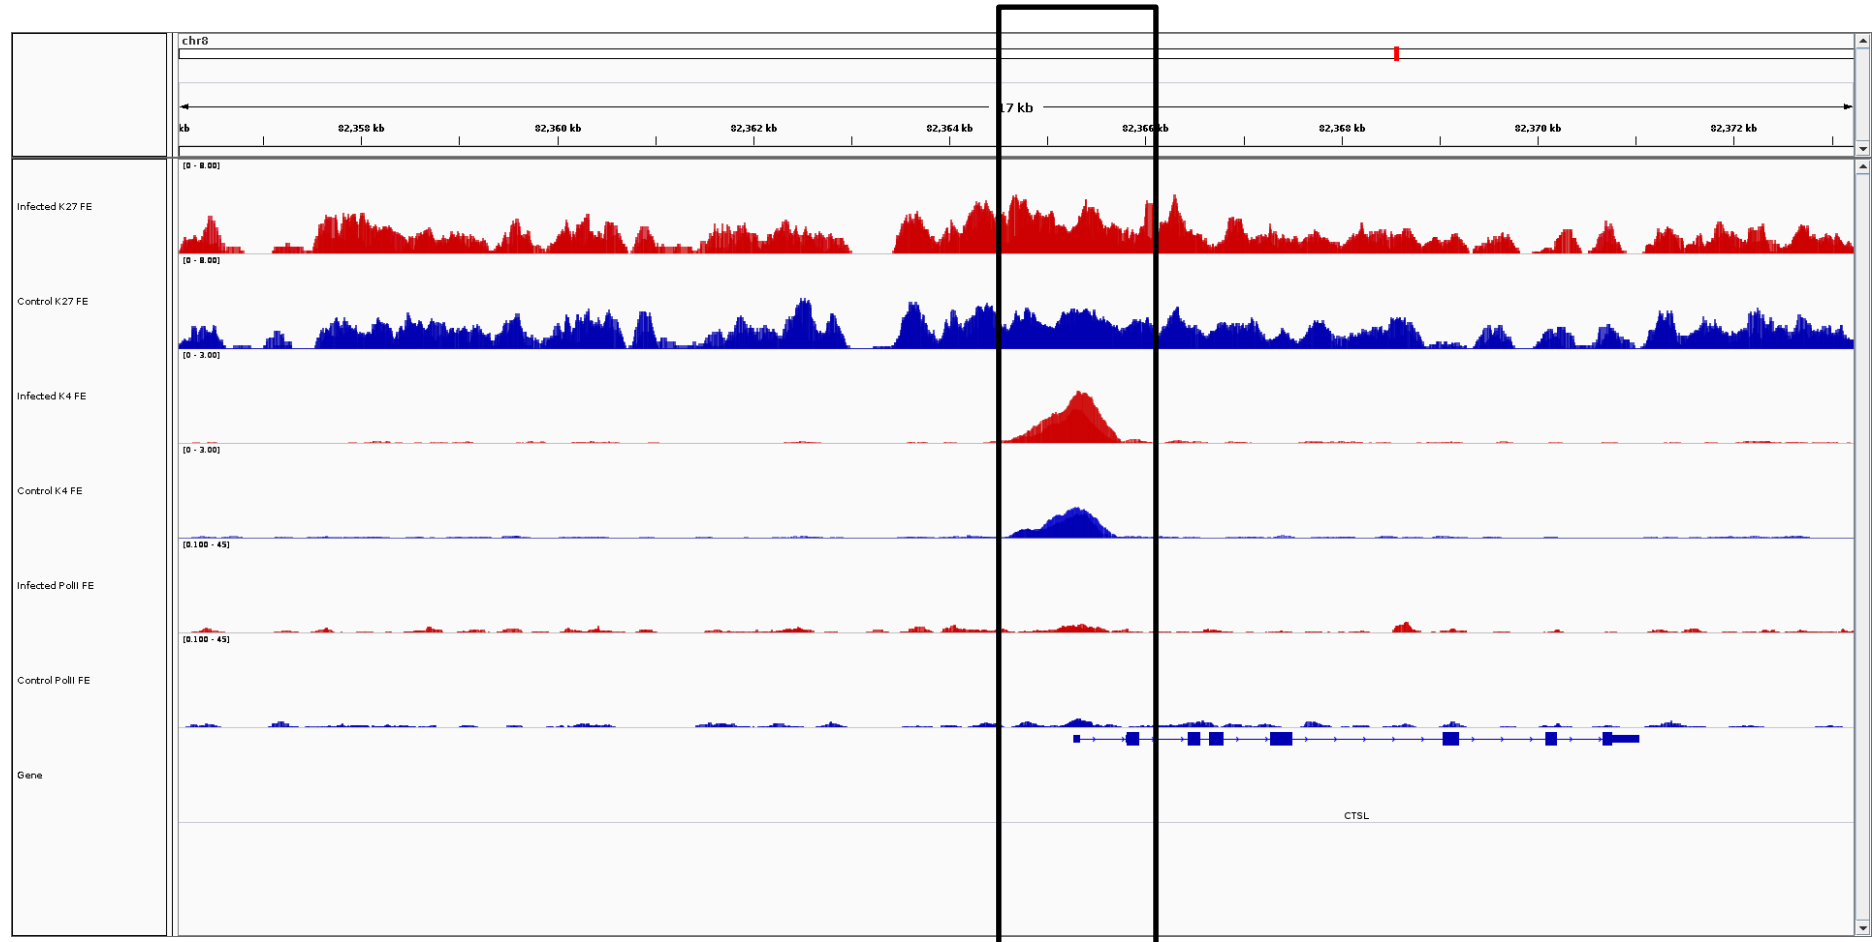

*CTSL*



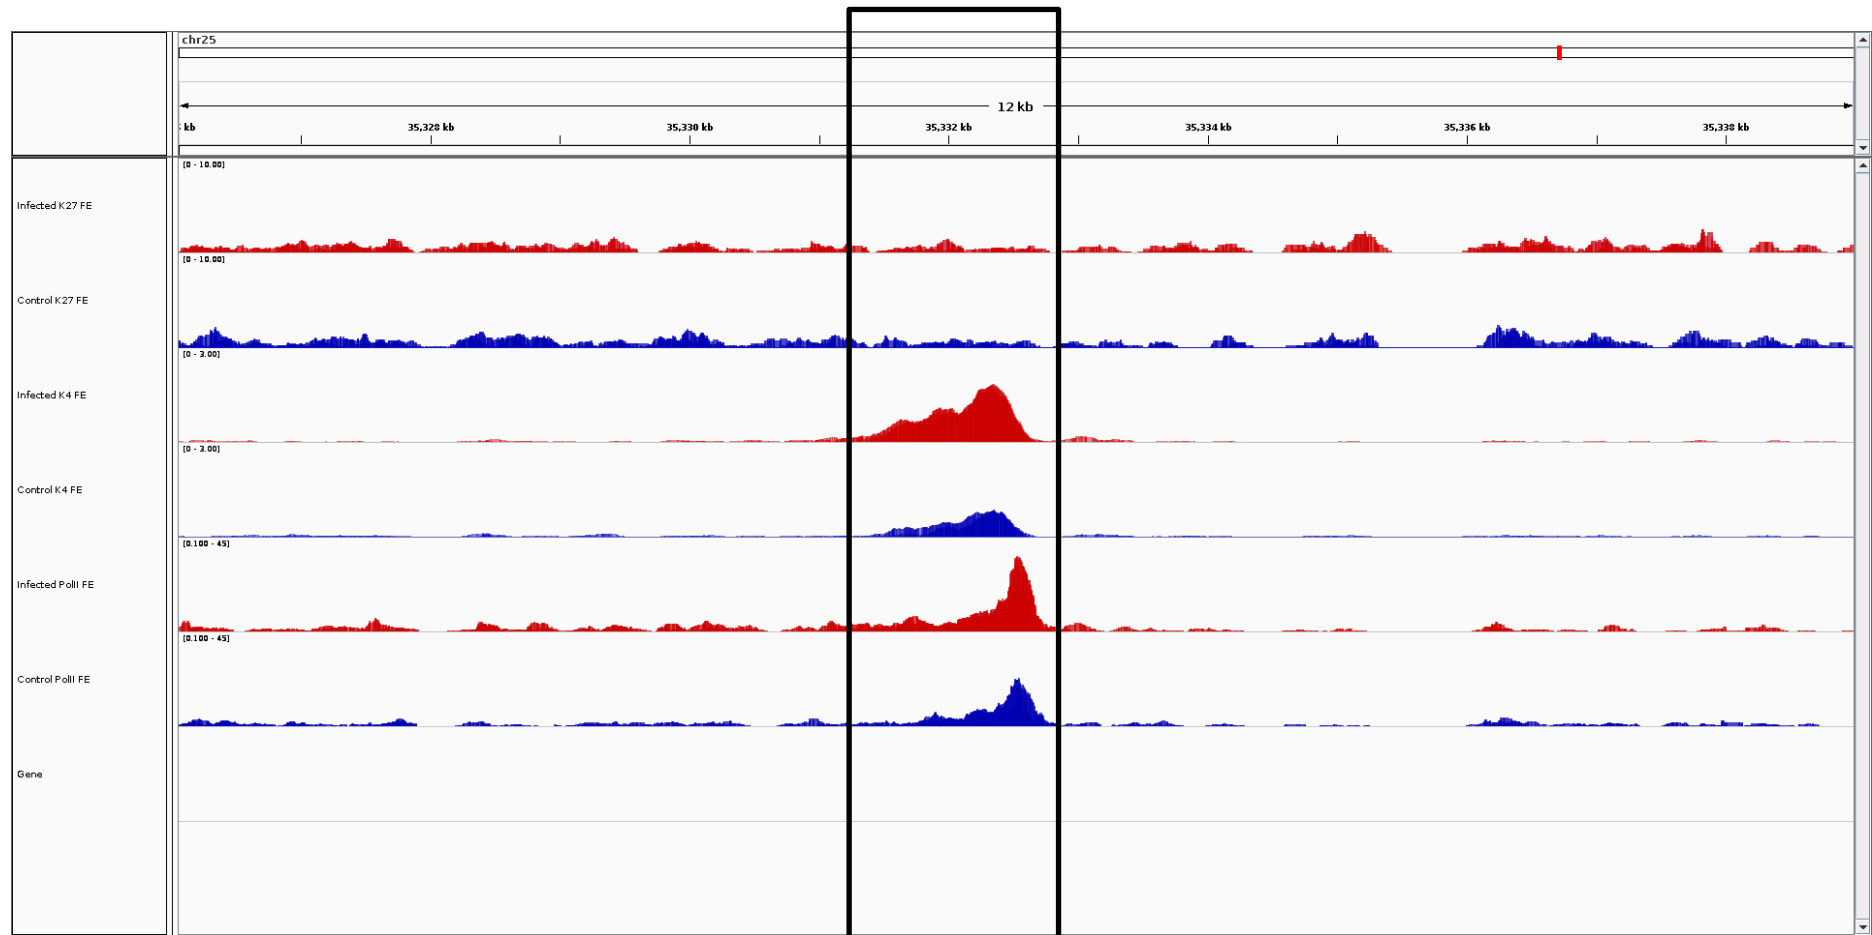

*CUX*

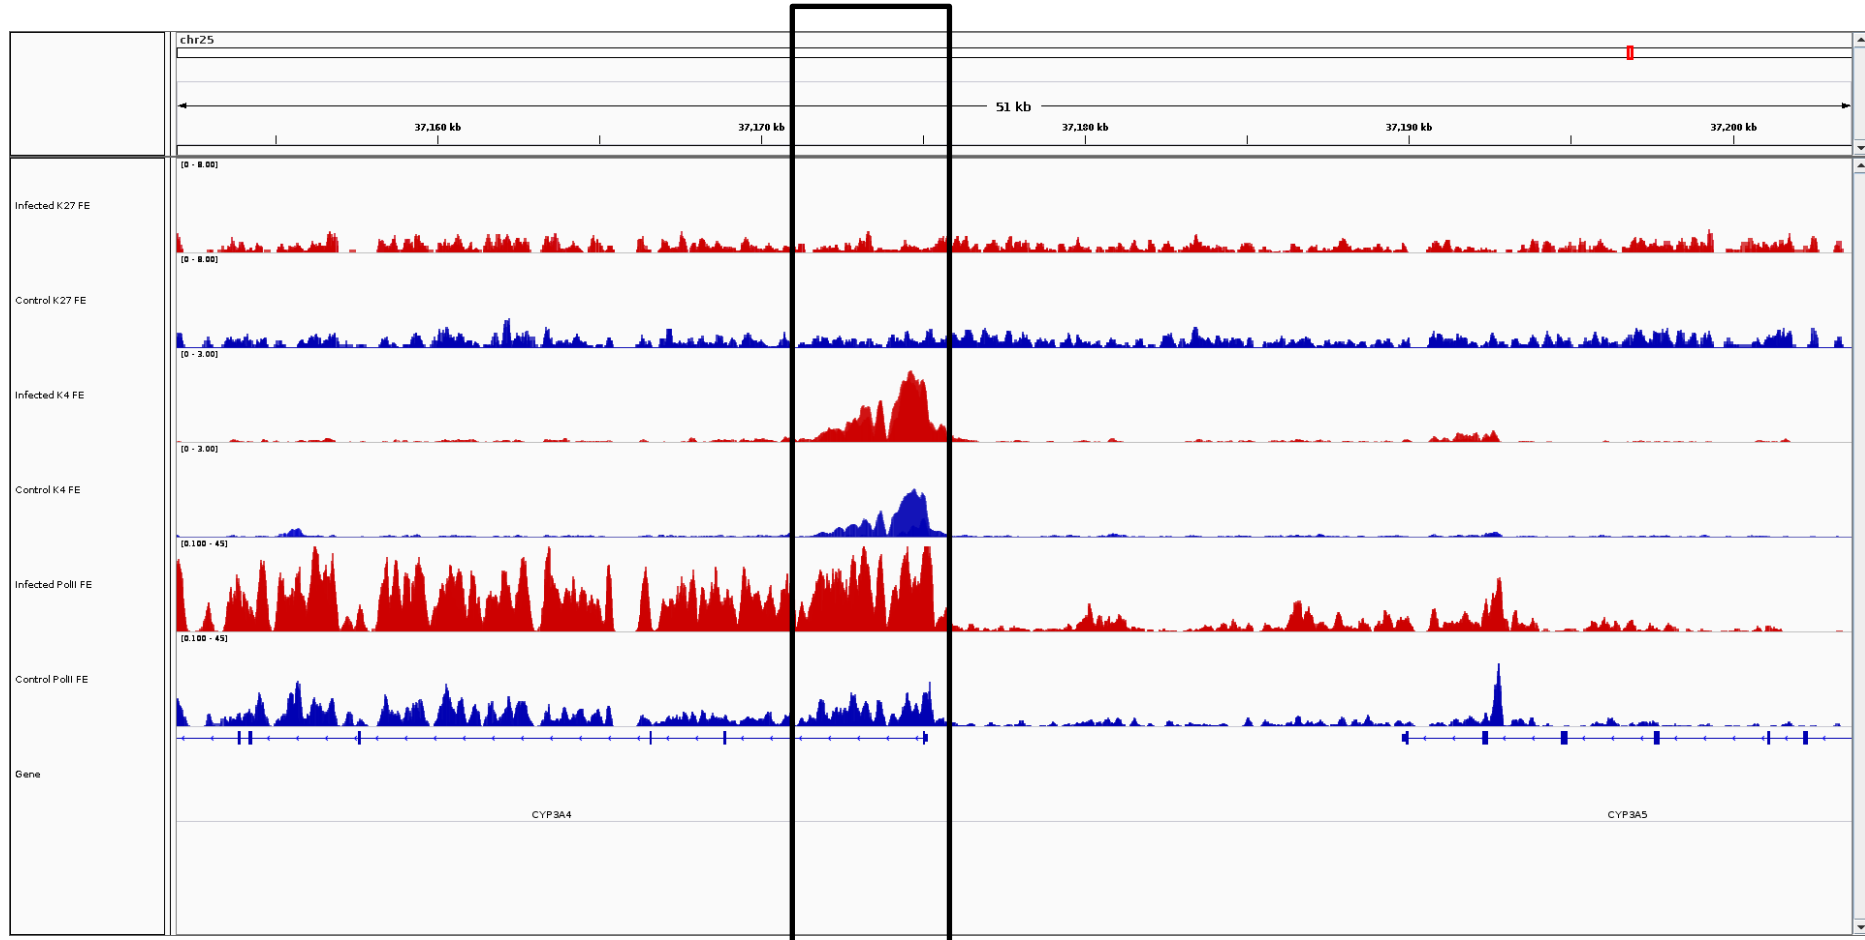

***CYP3A4***

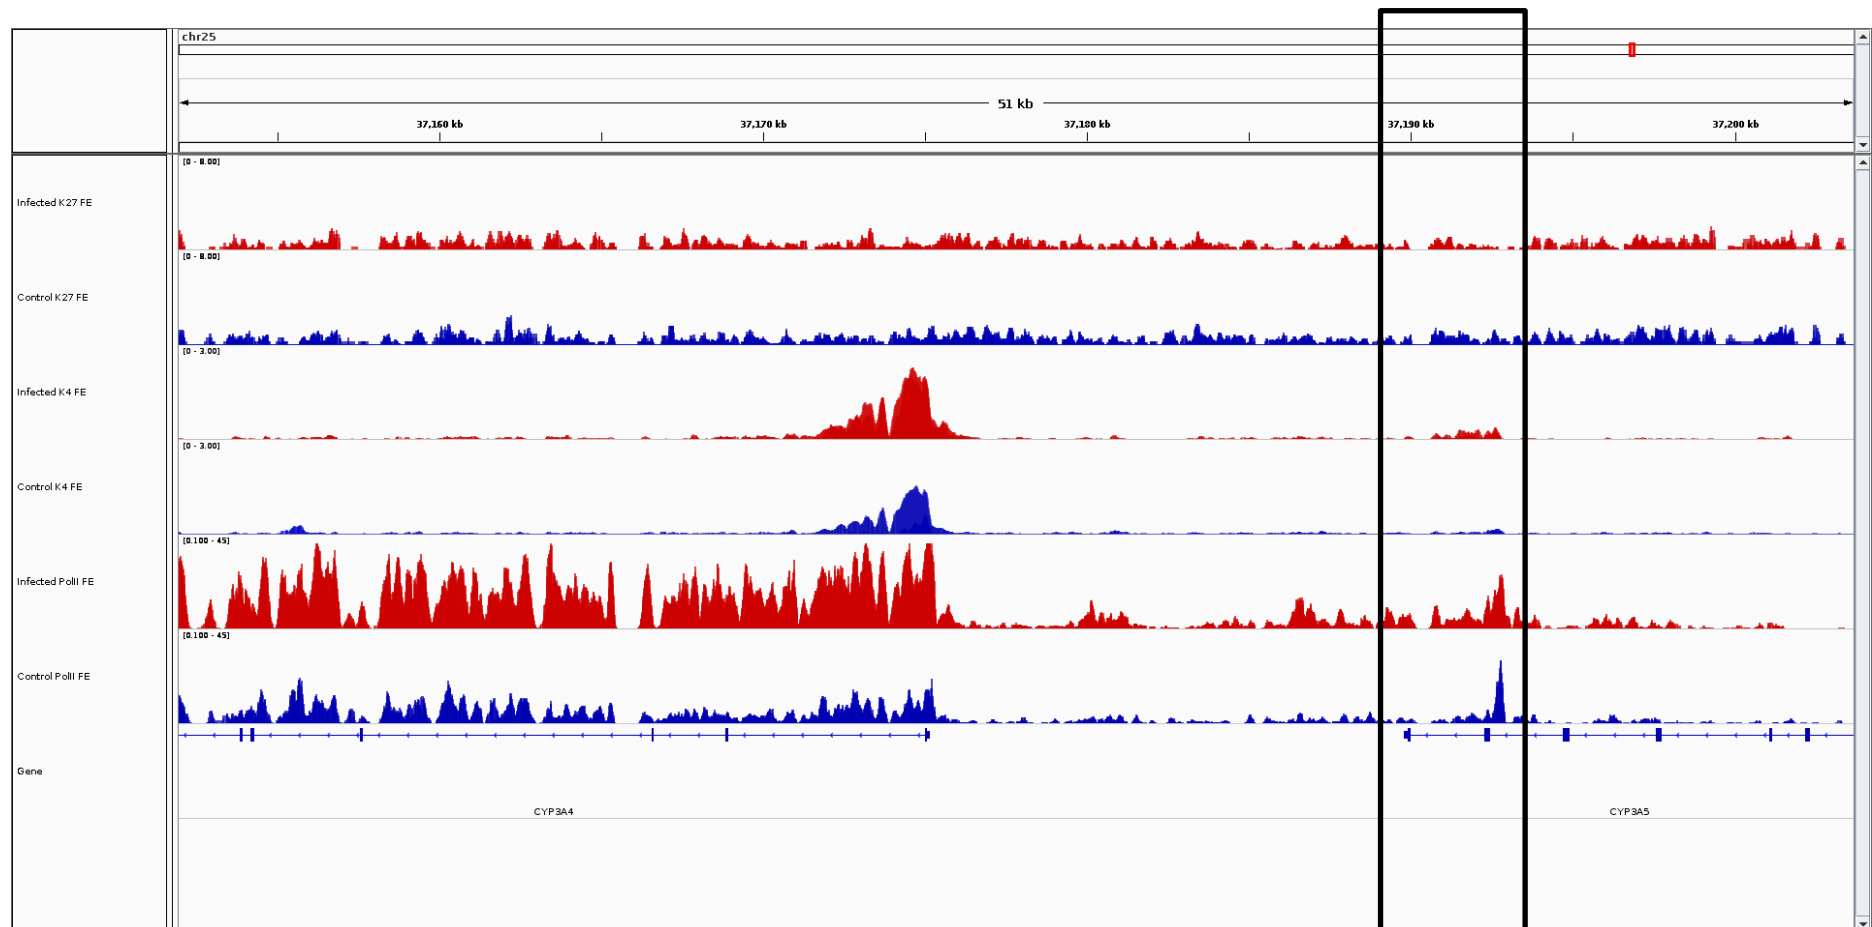

***CYP3A5***

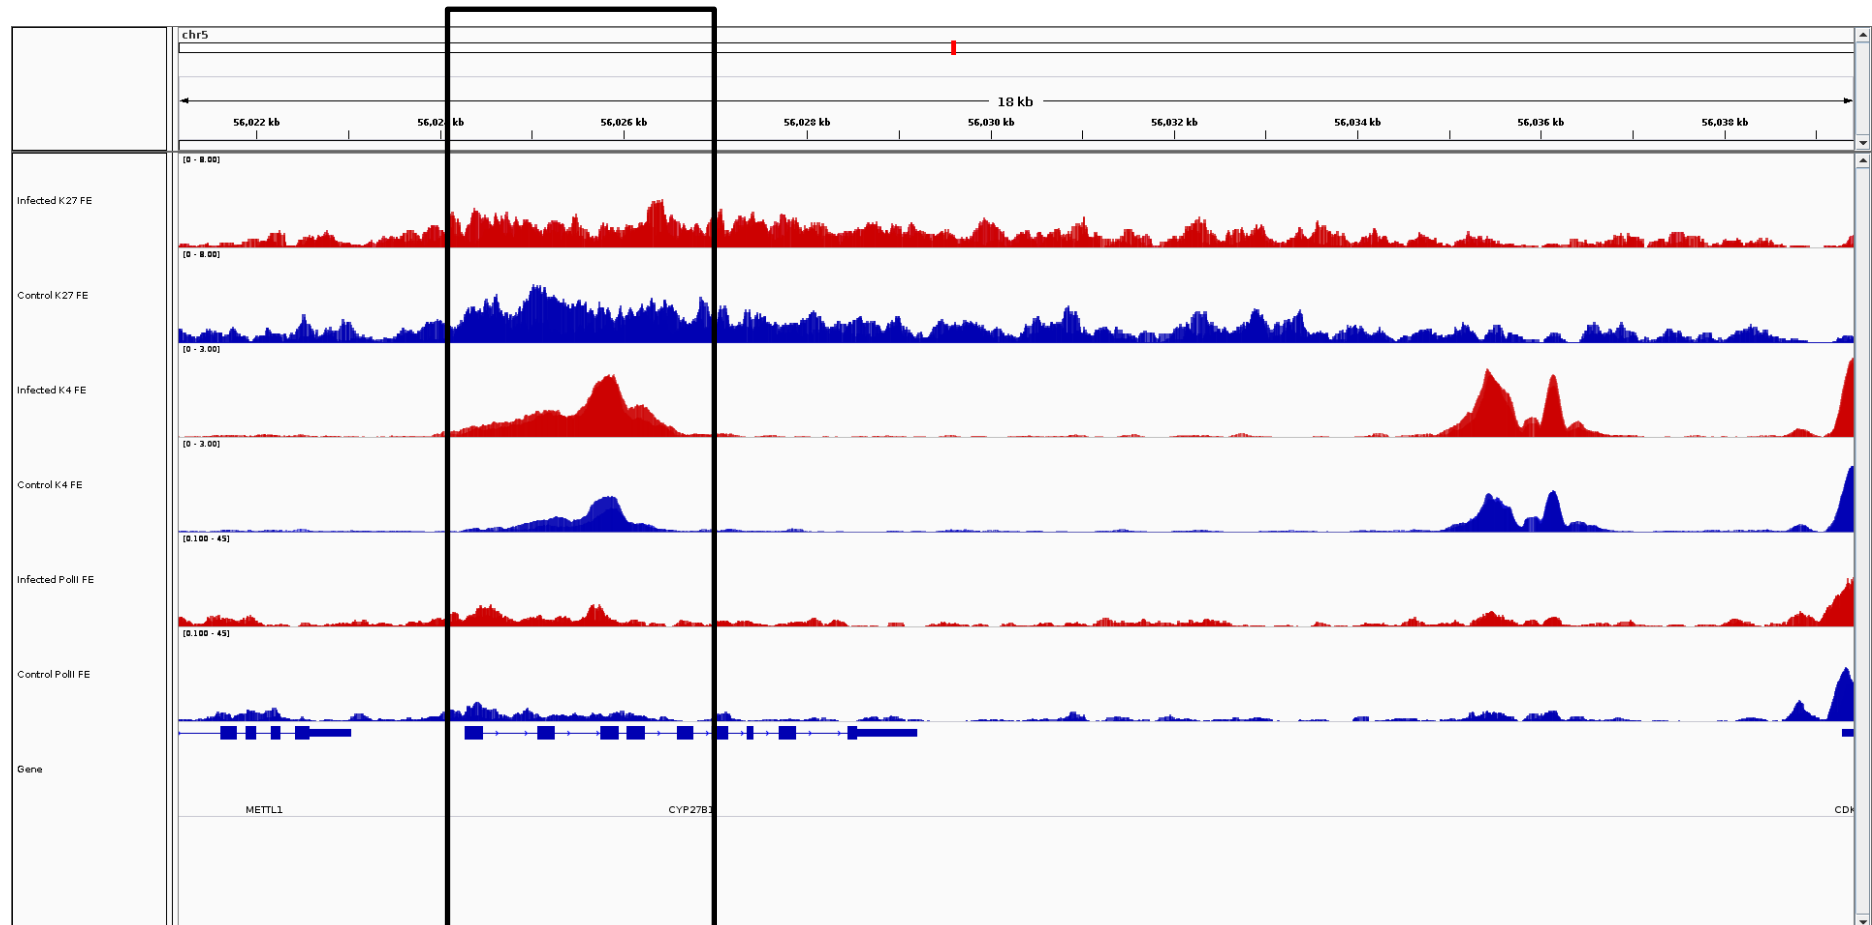

***CYP27B1***

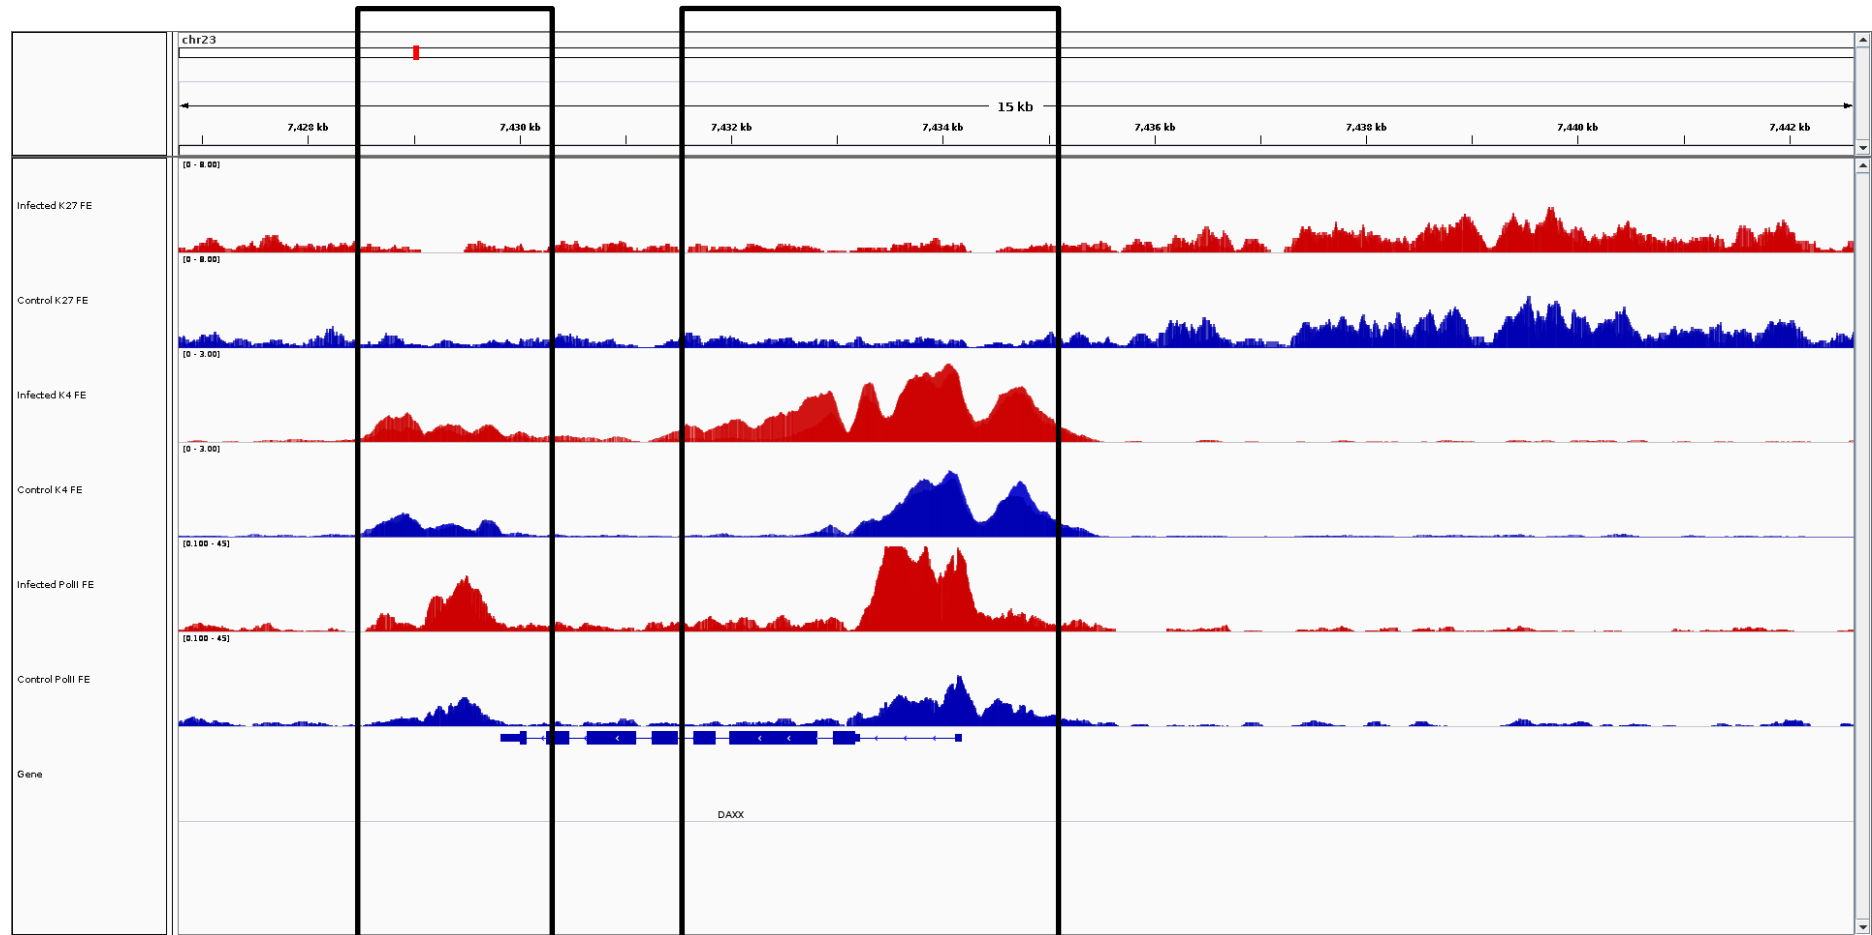

*DAXX*

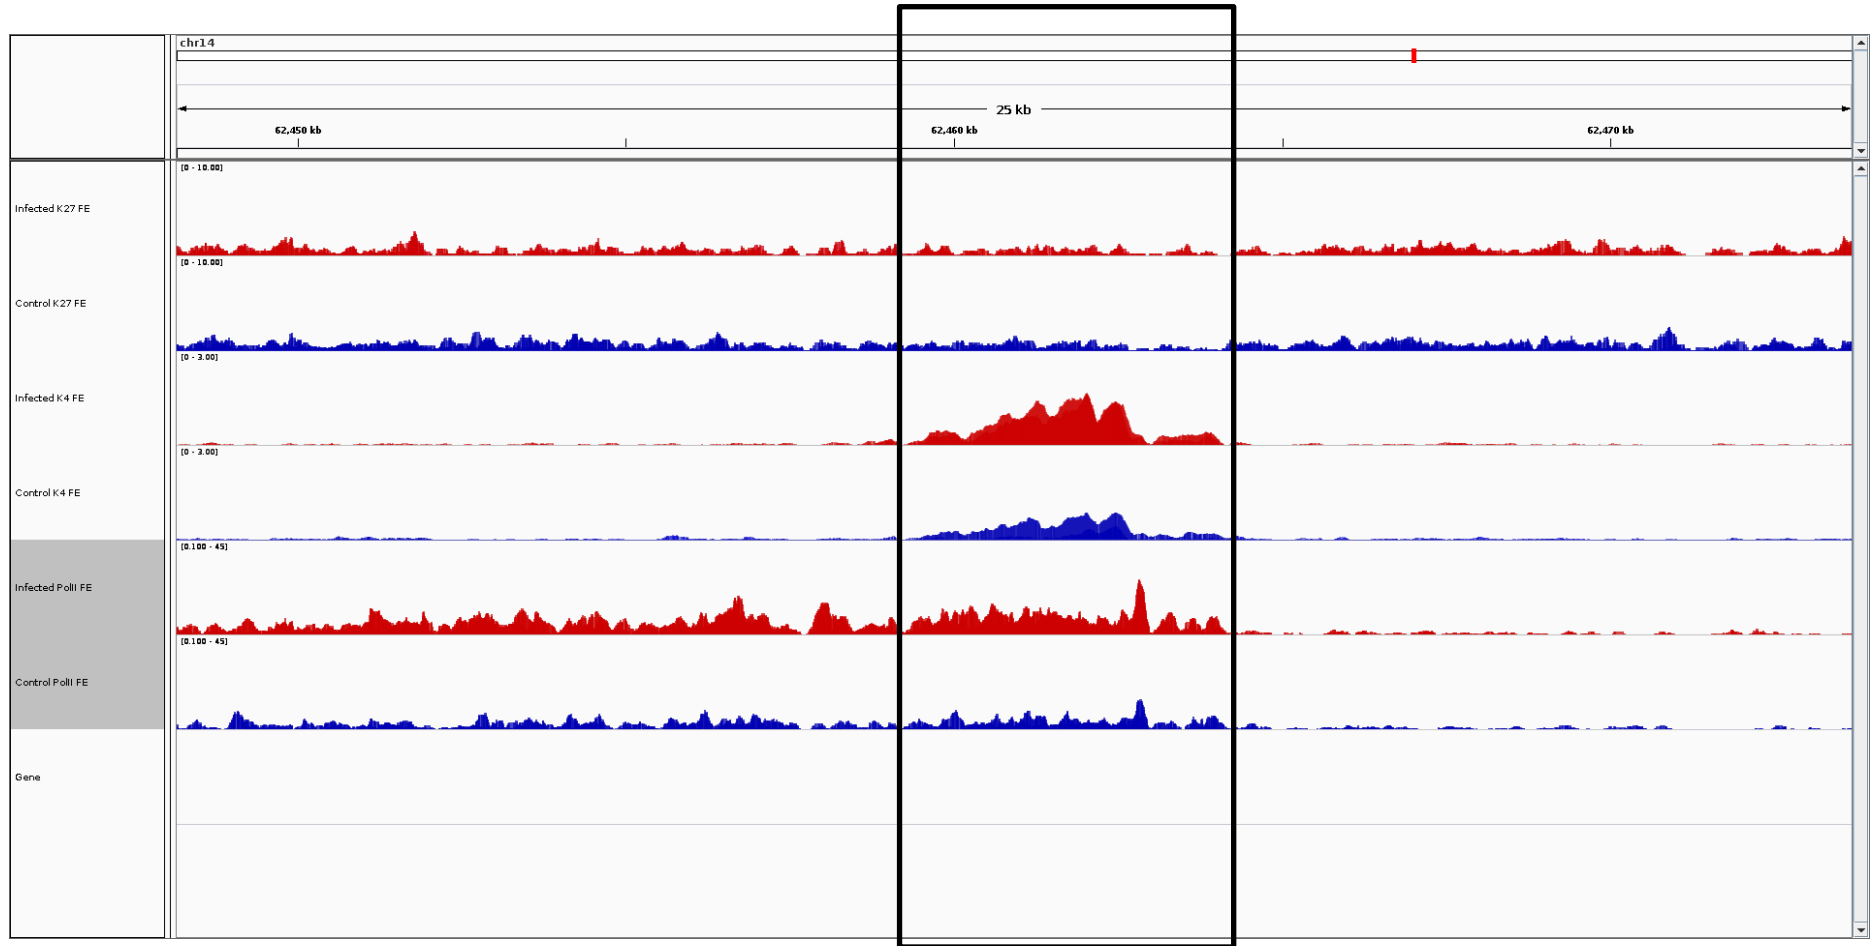

*DCSTAMP*

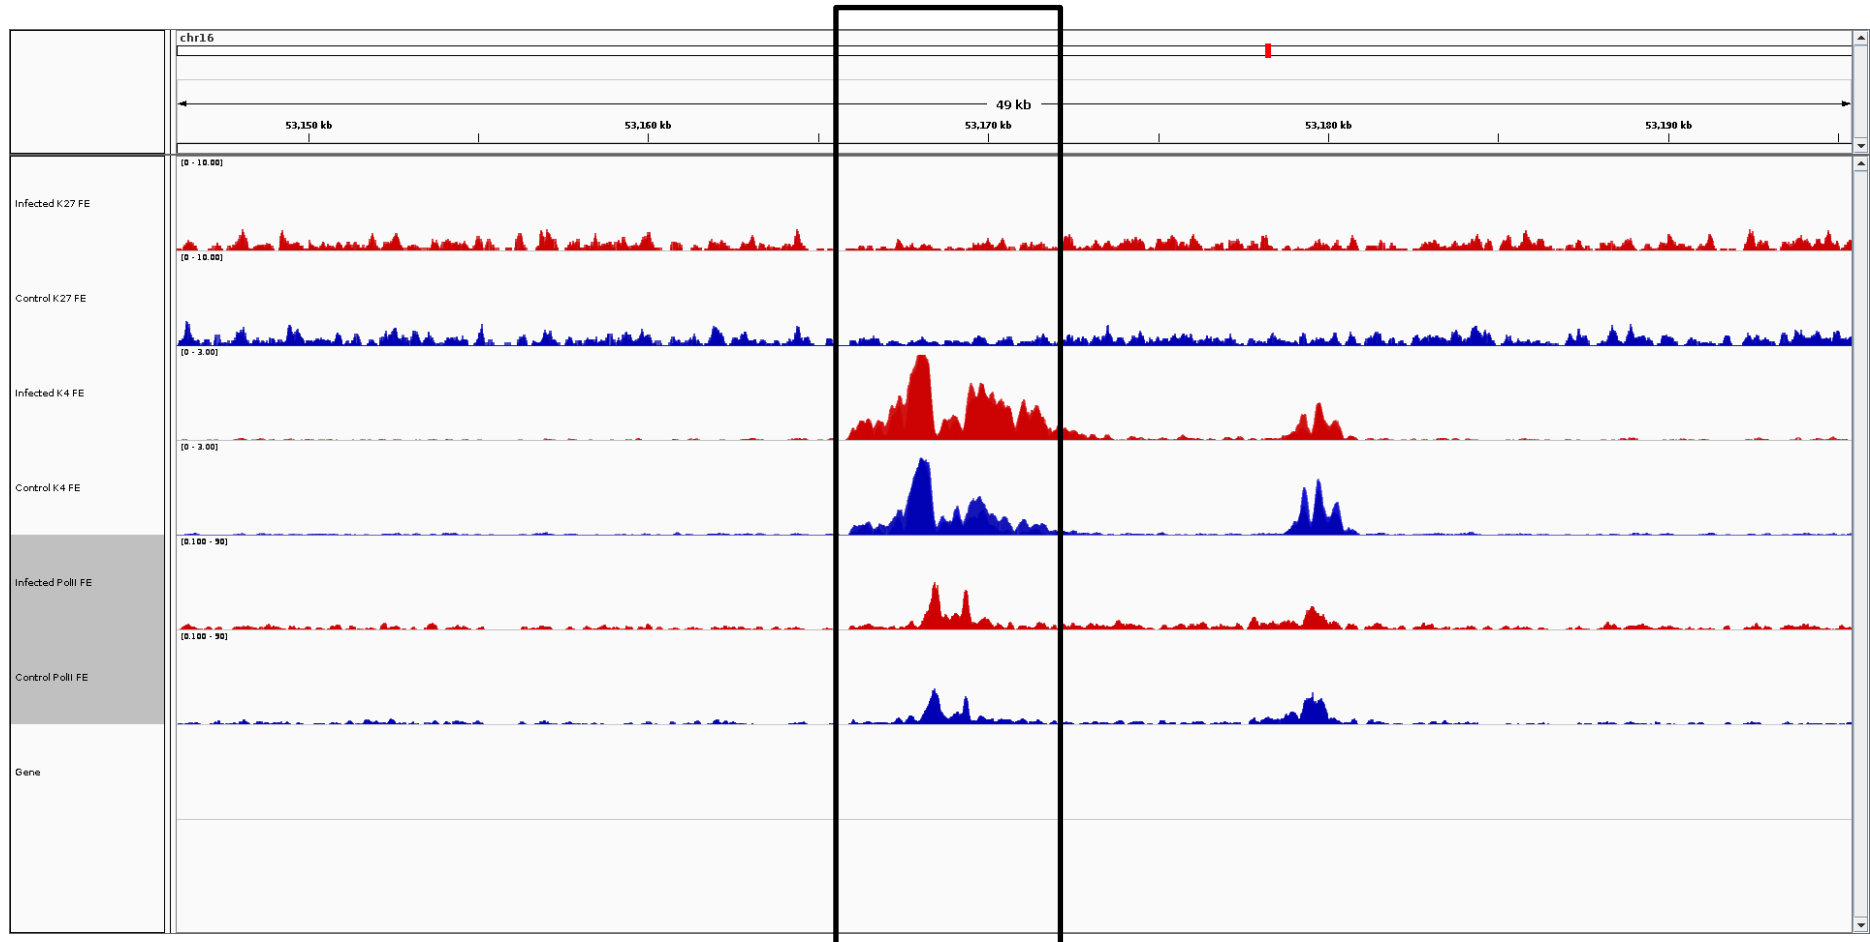

***DDI2***

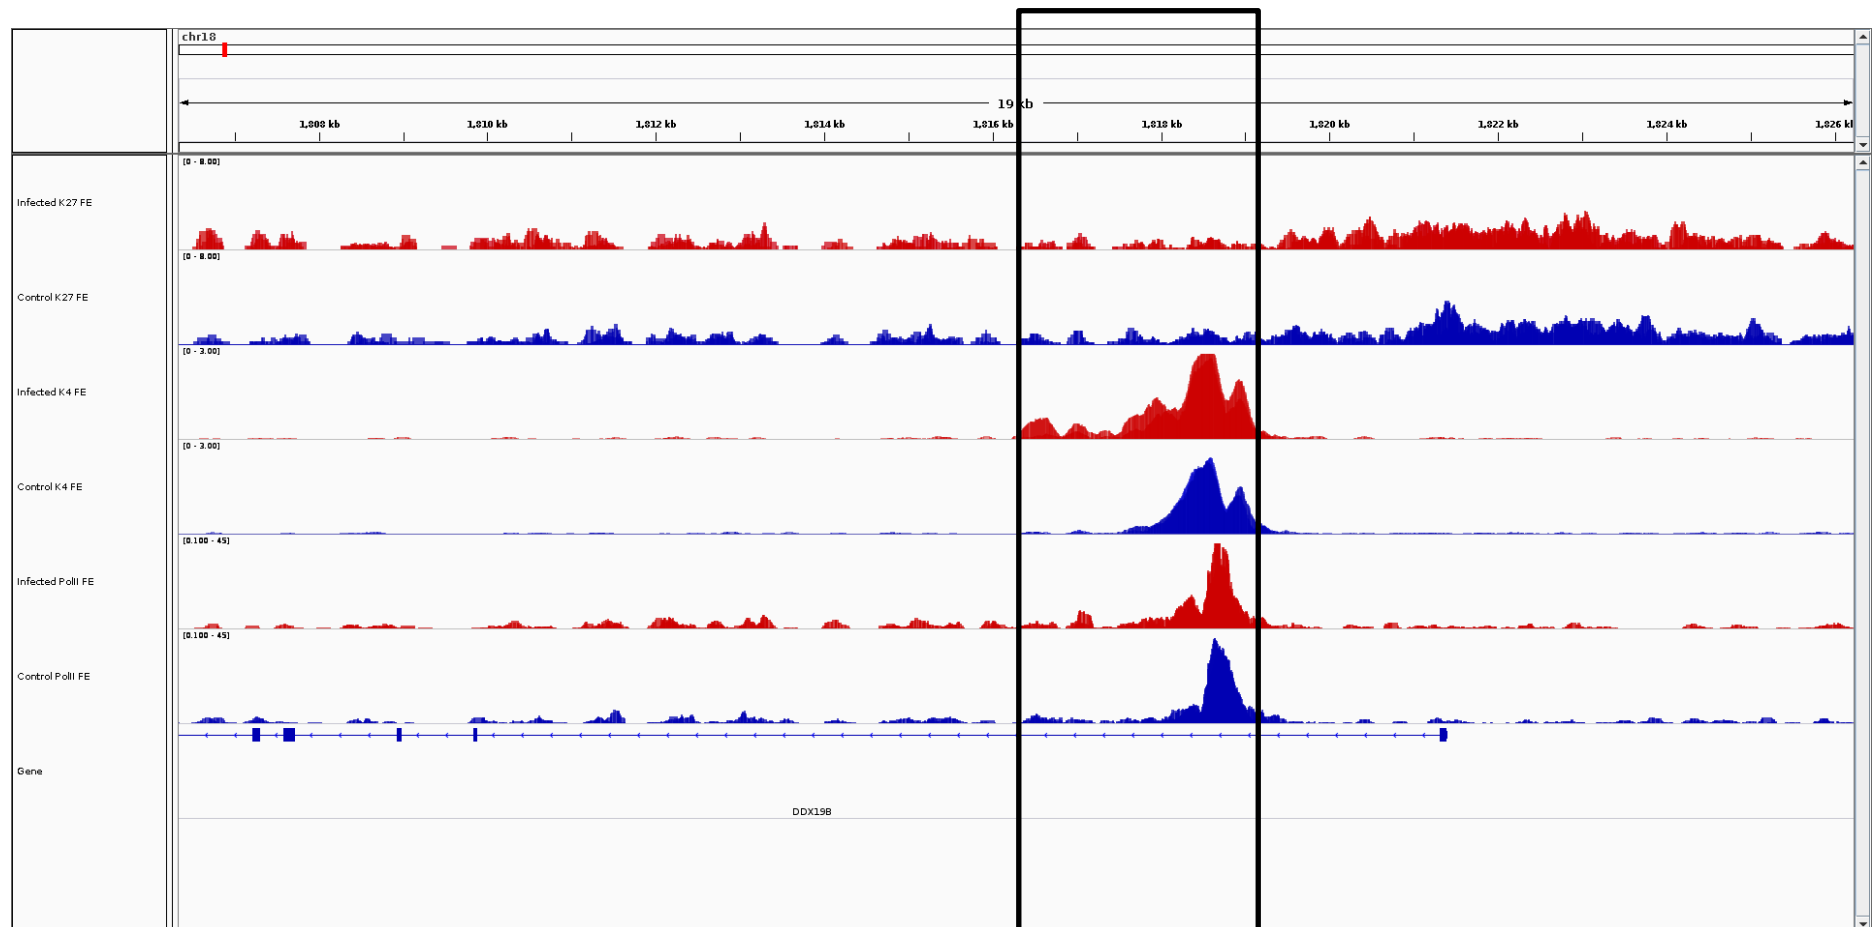

***DDX19B***



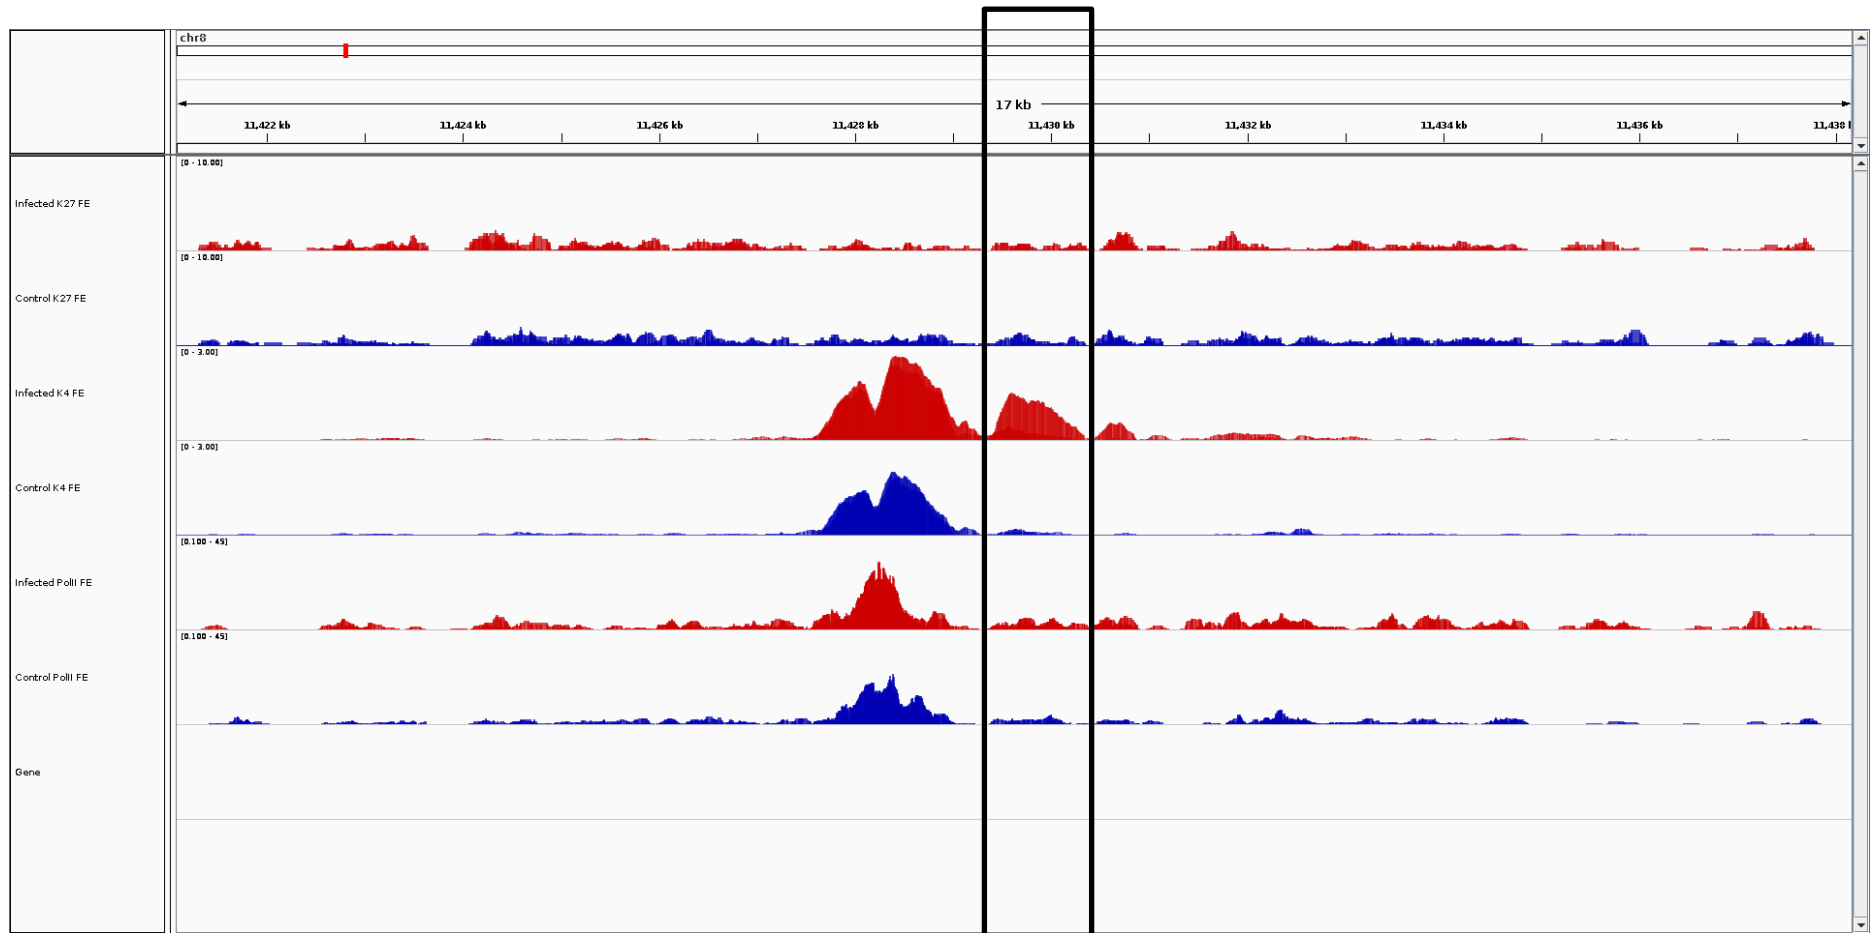

***DDX58***

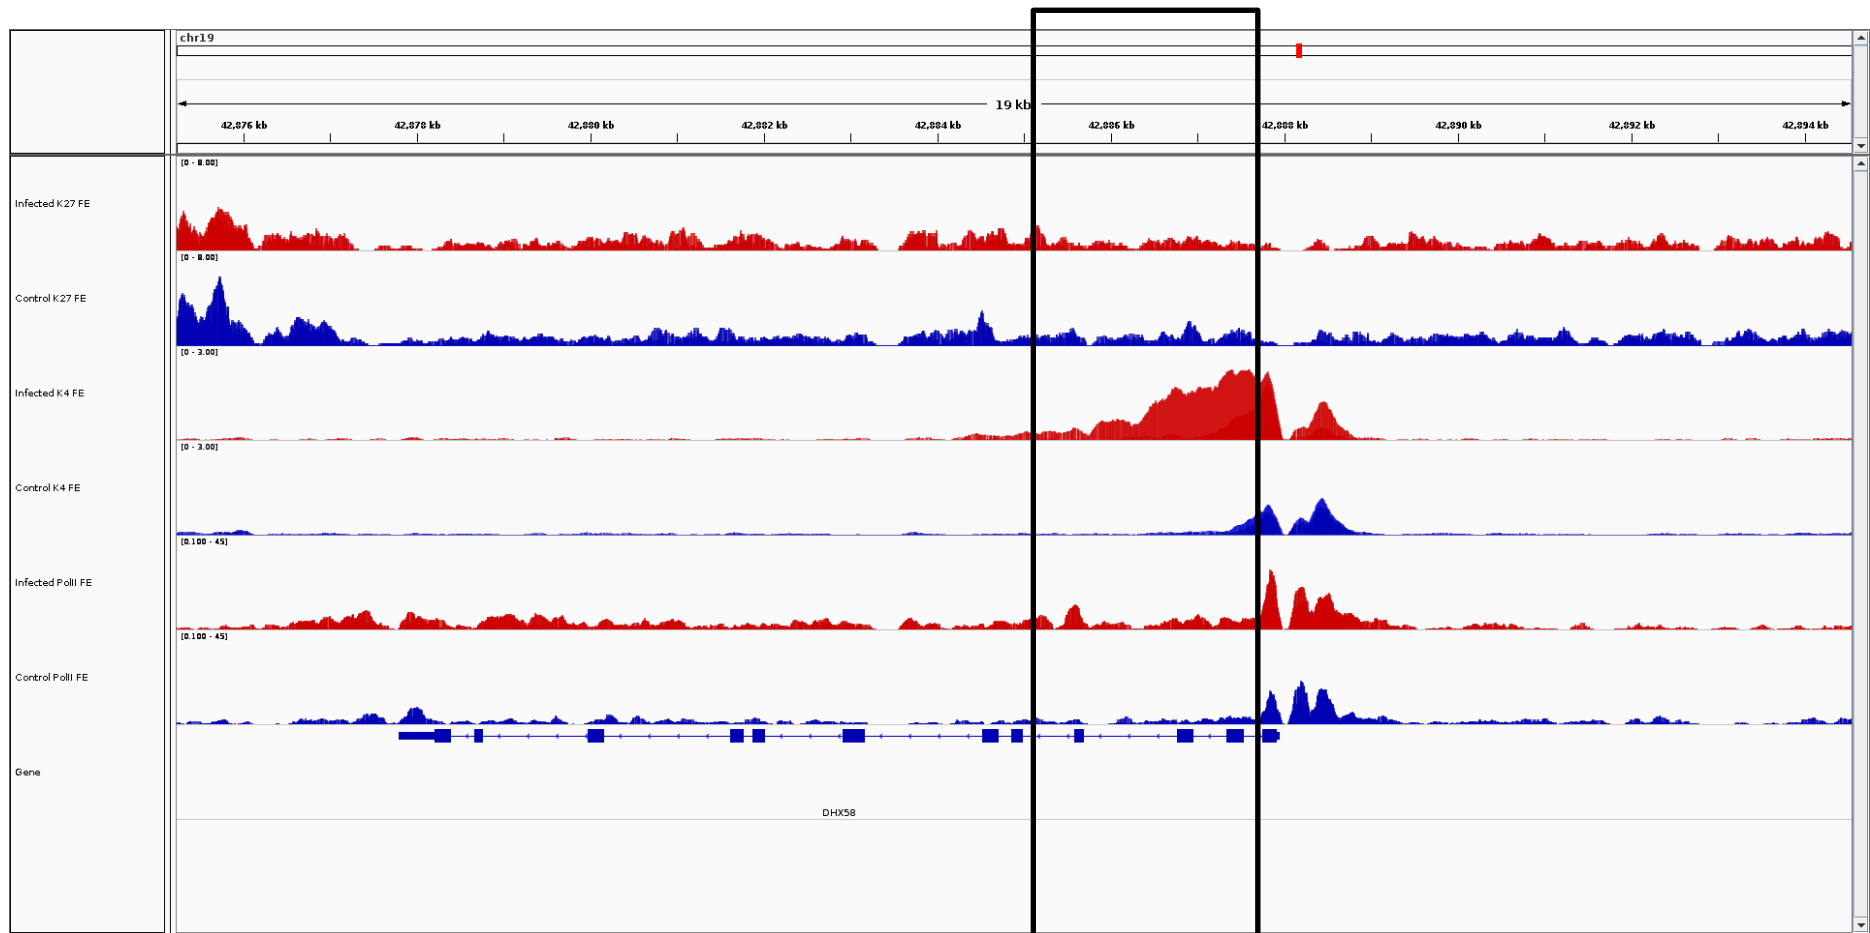

***DHX58***

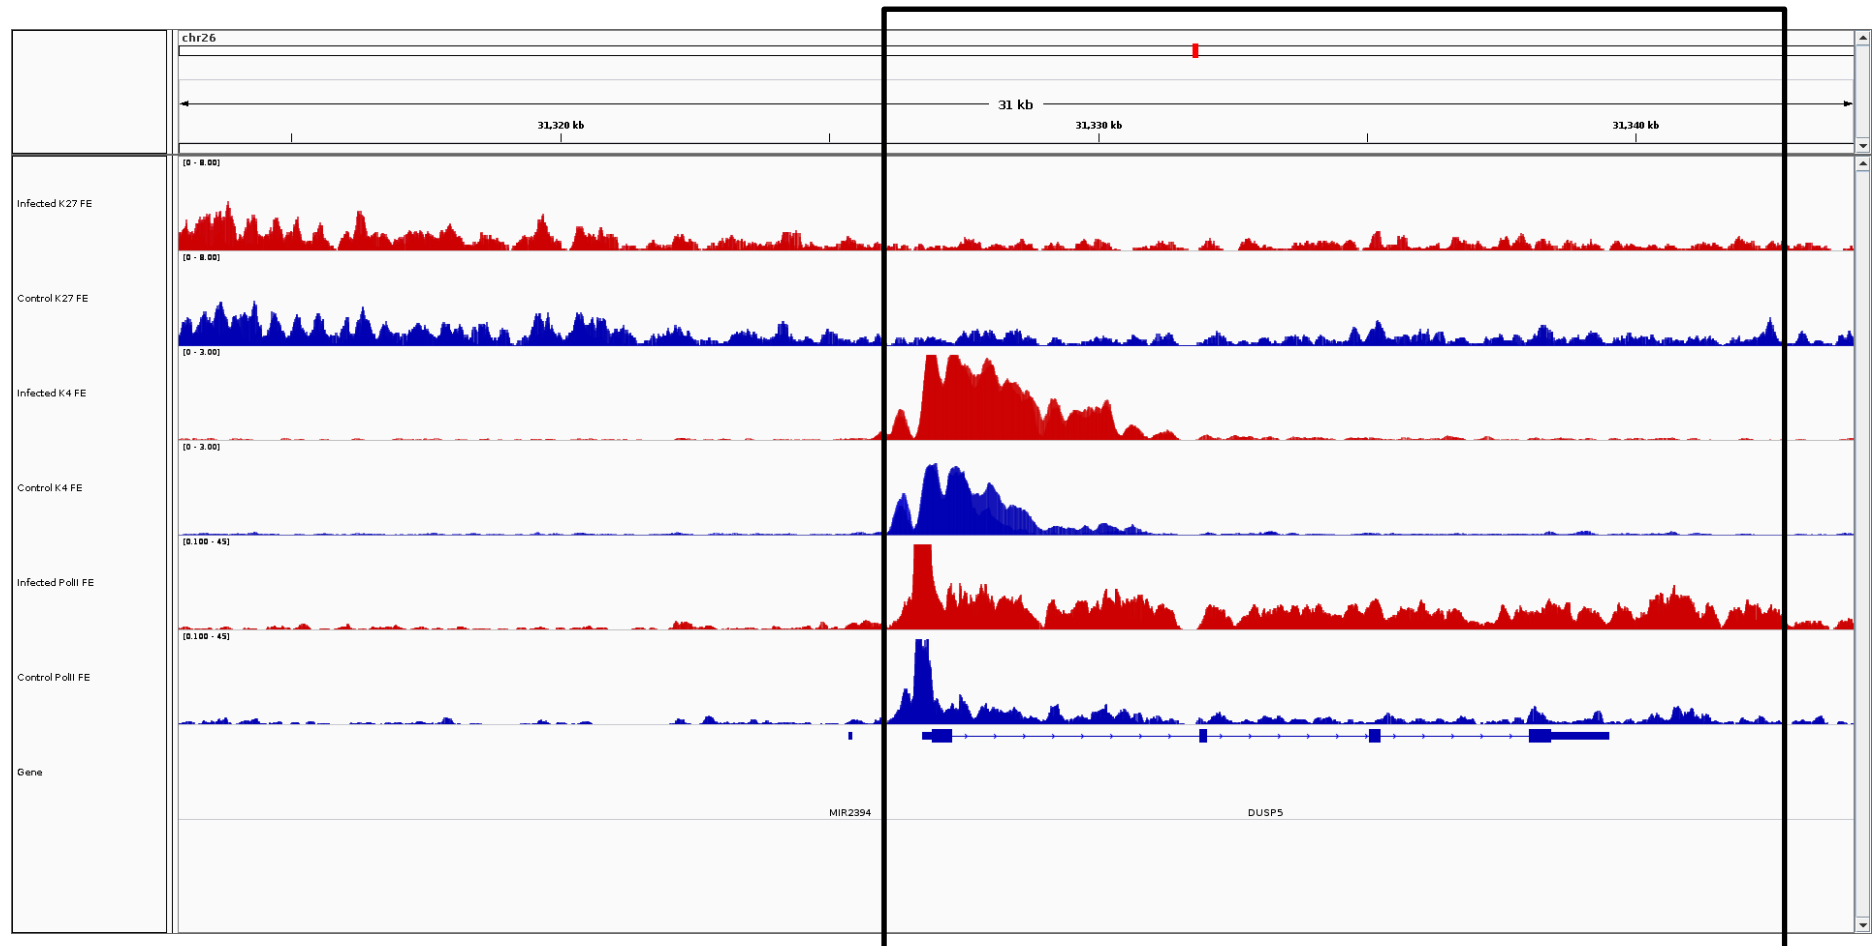

*DUSP5*

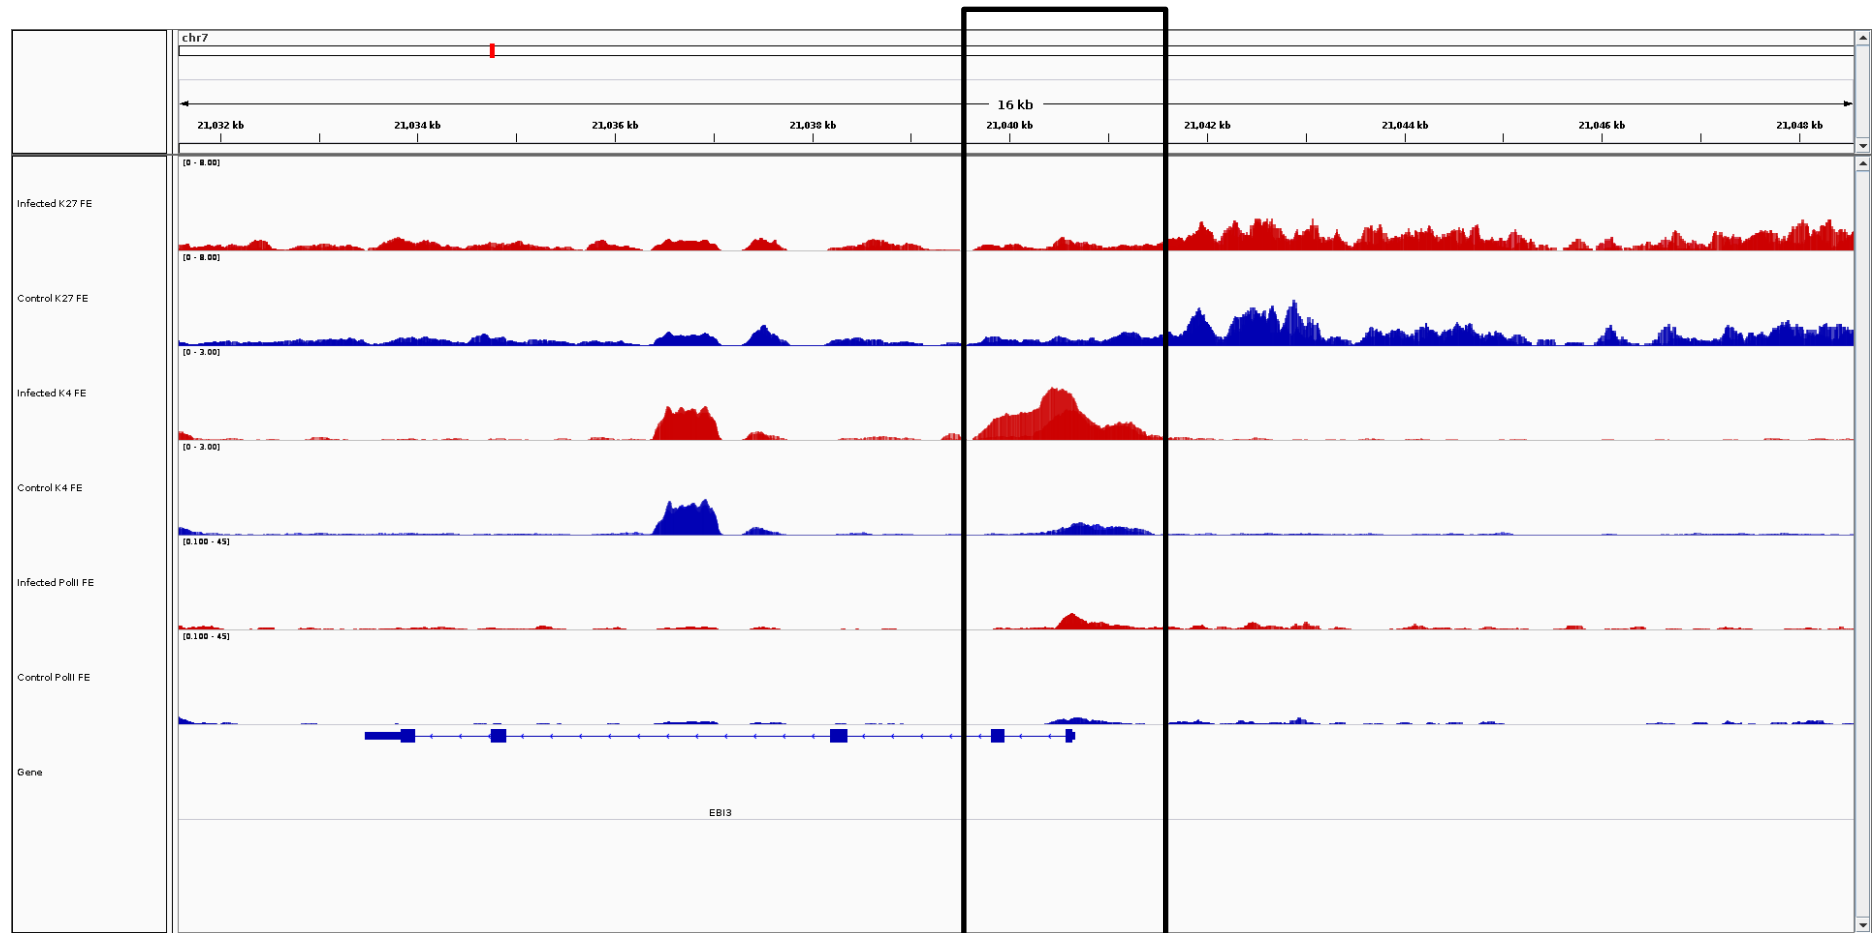

***EB13***

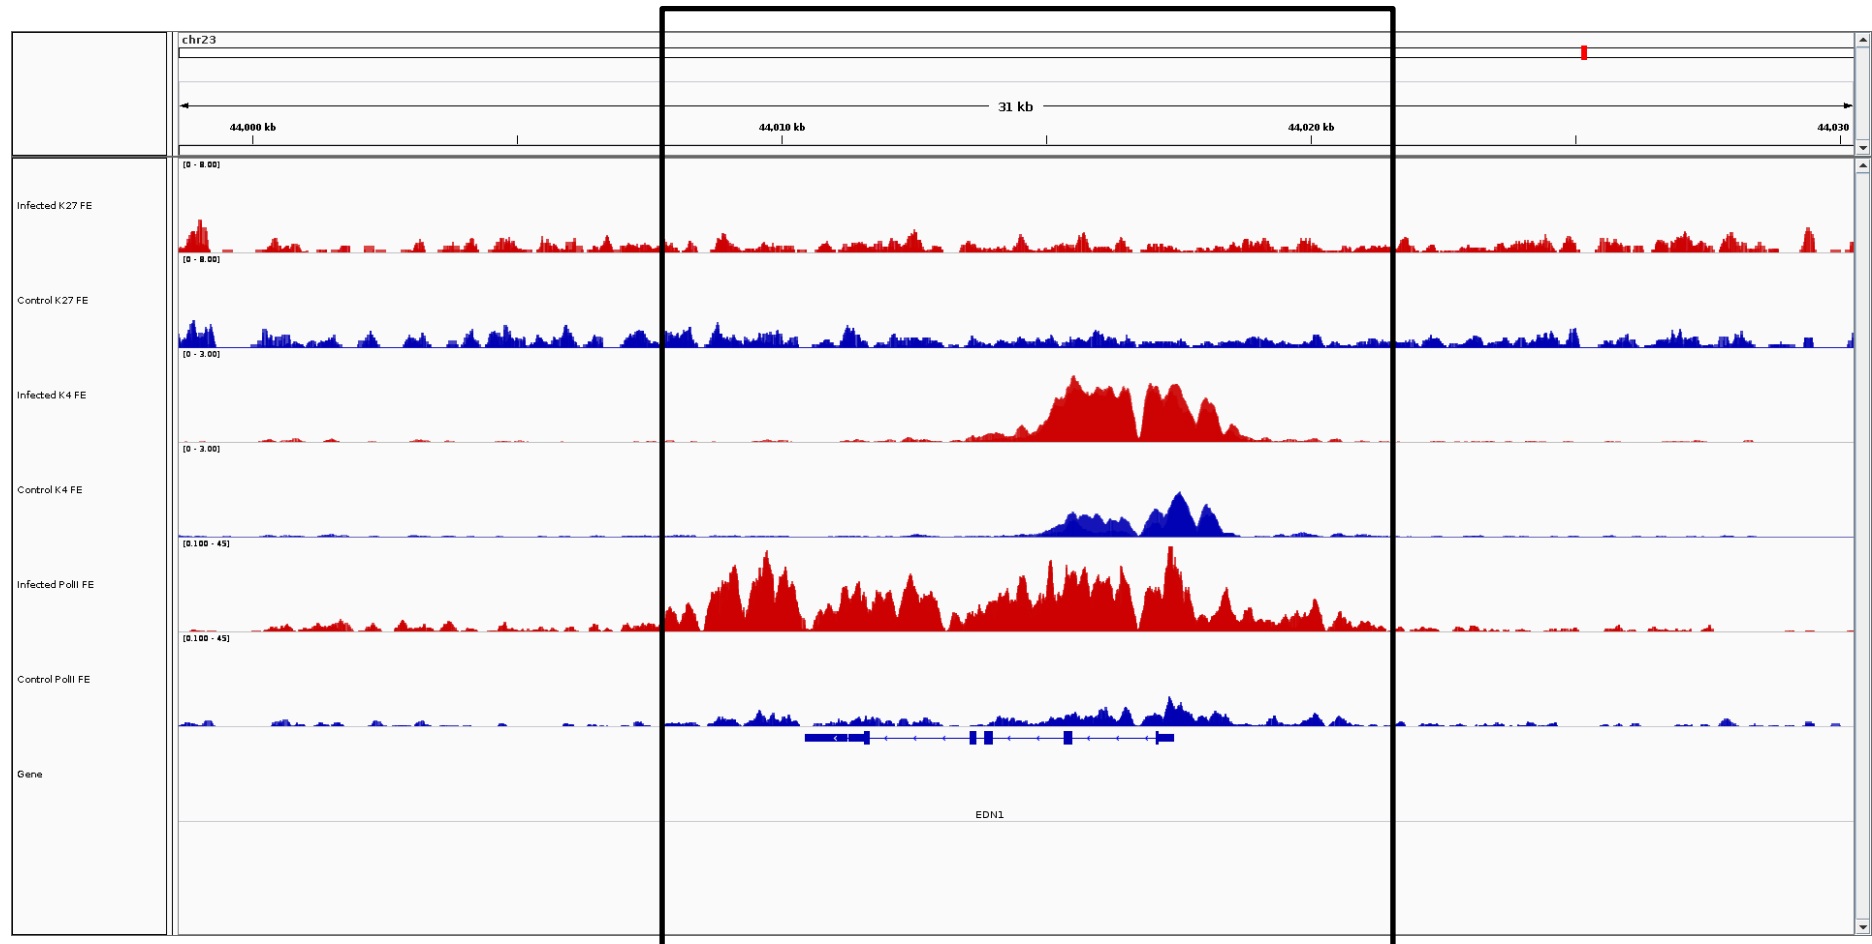

***EDN1***

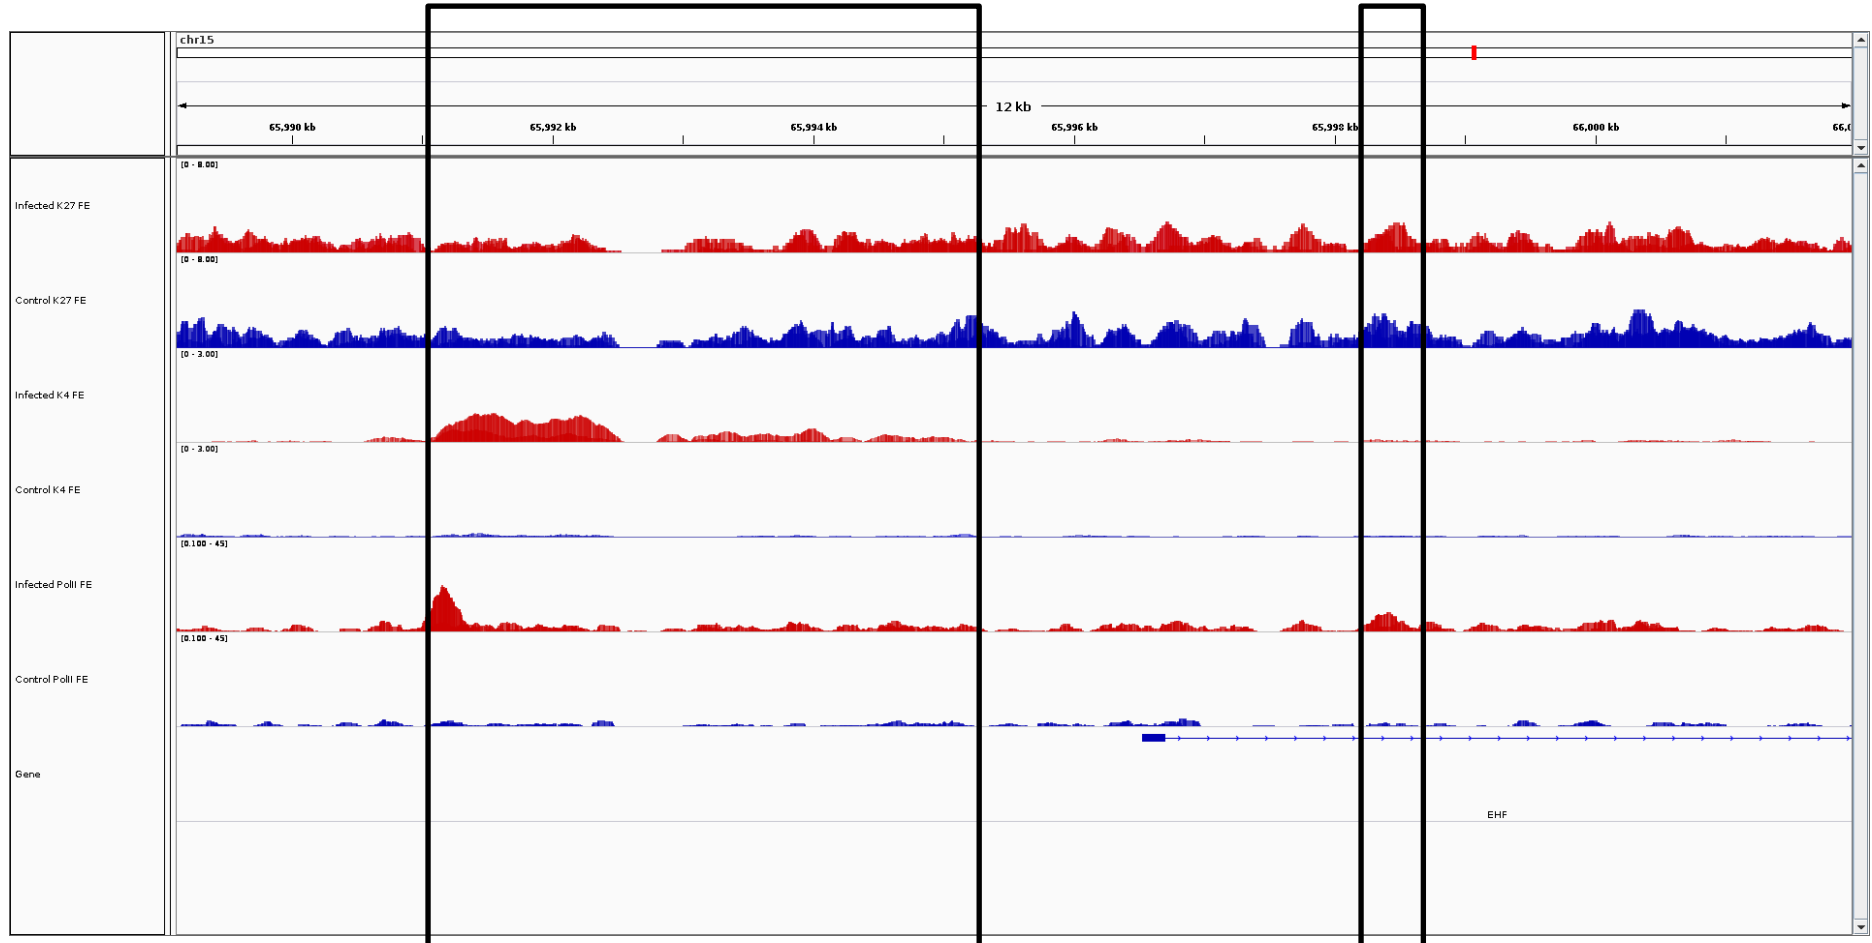

***EHF***

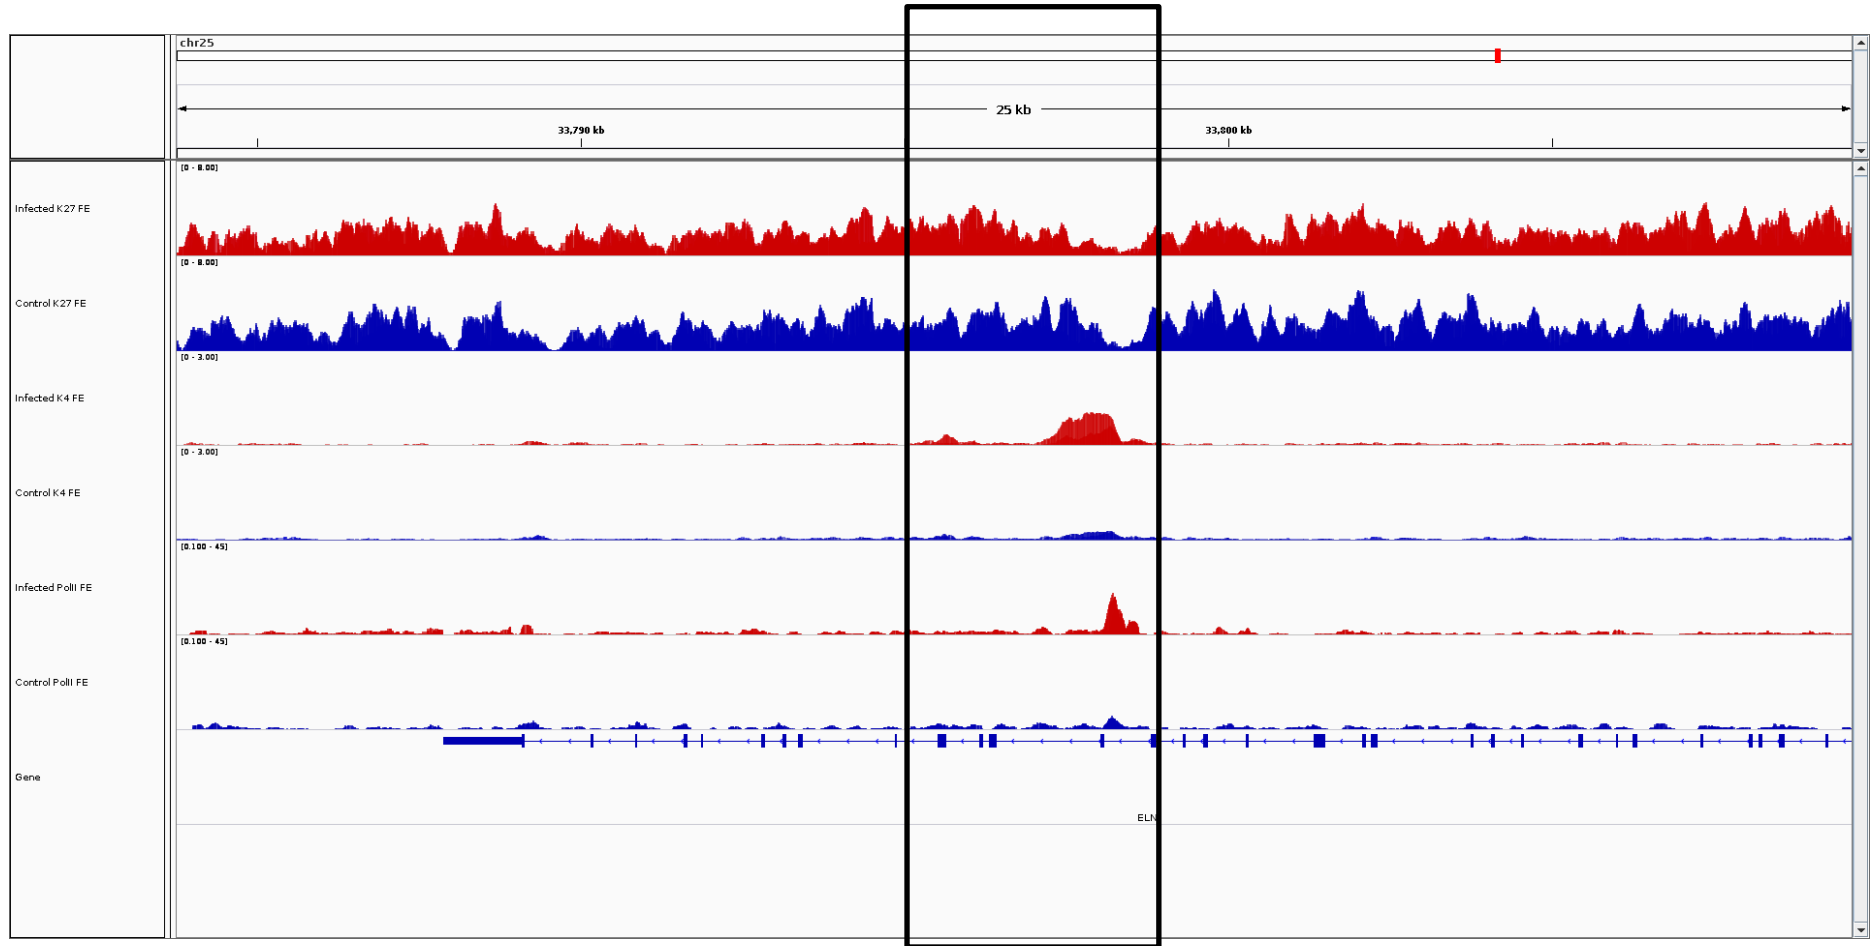

*ELN*

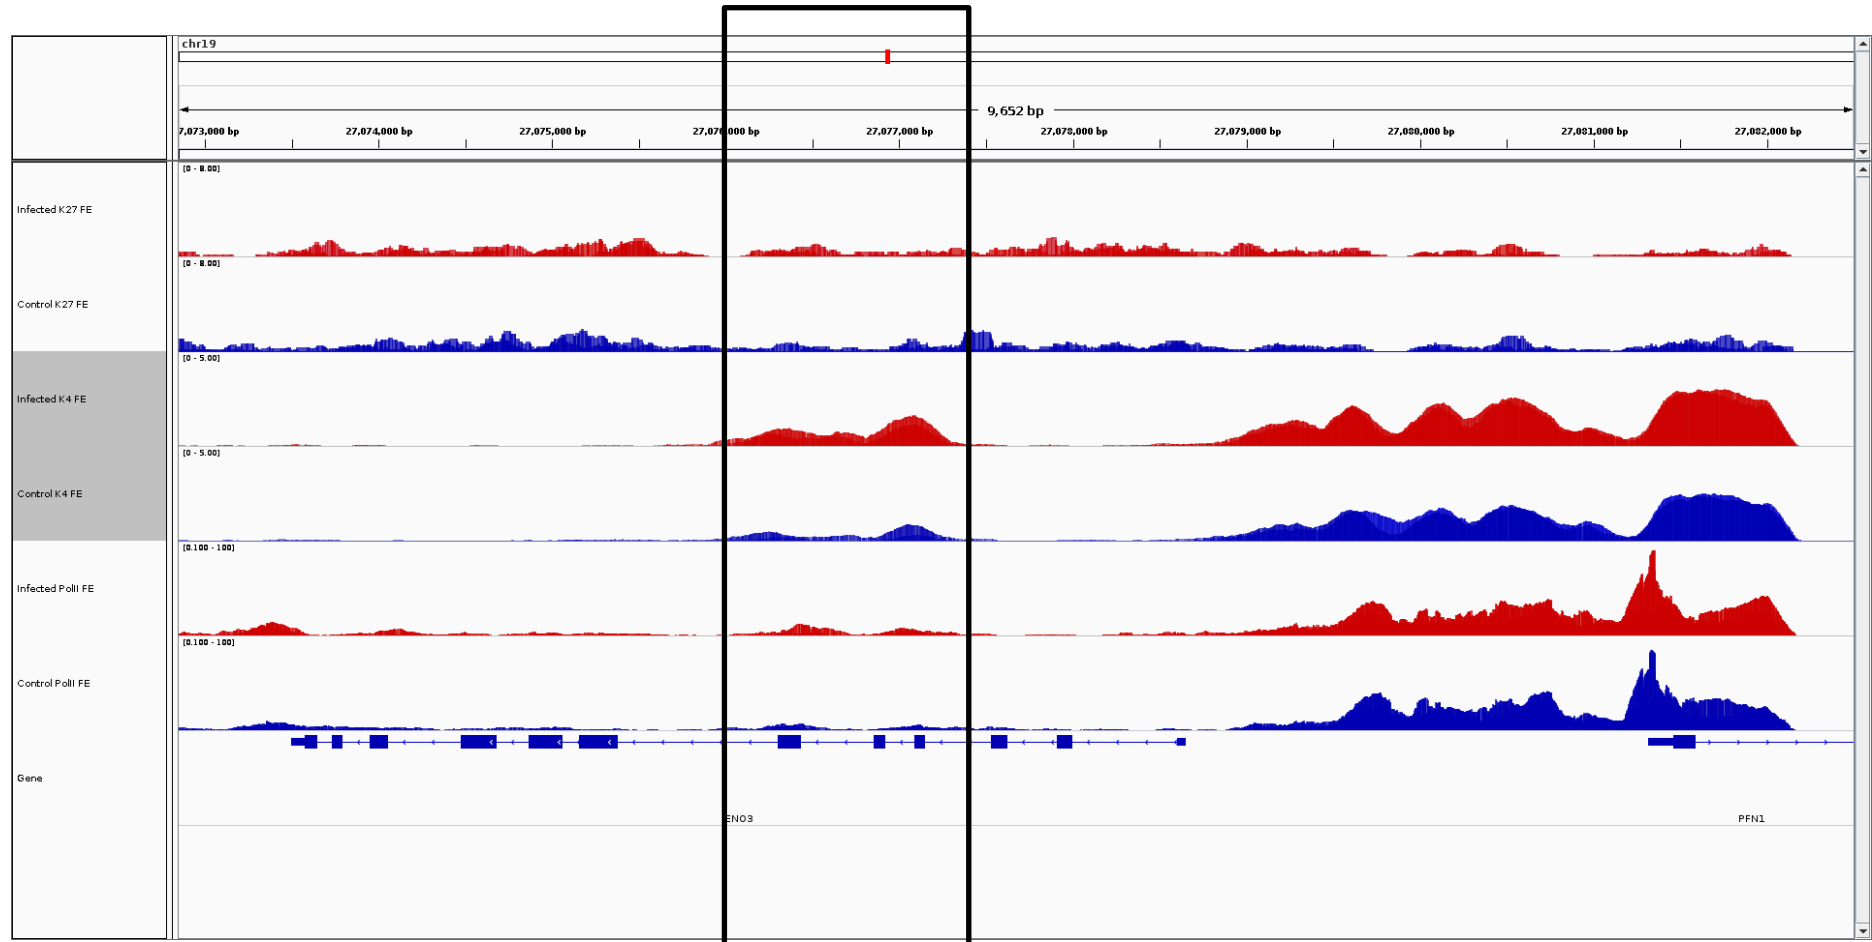

*ENO3*



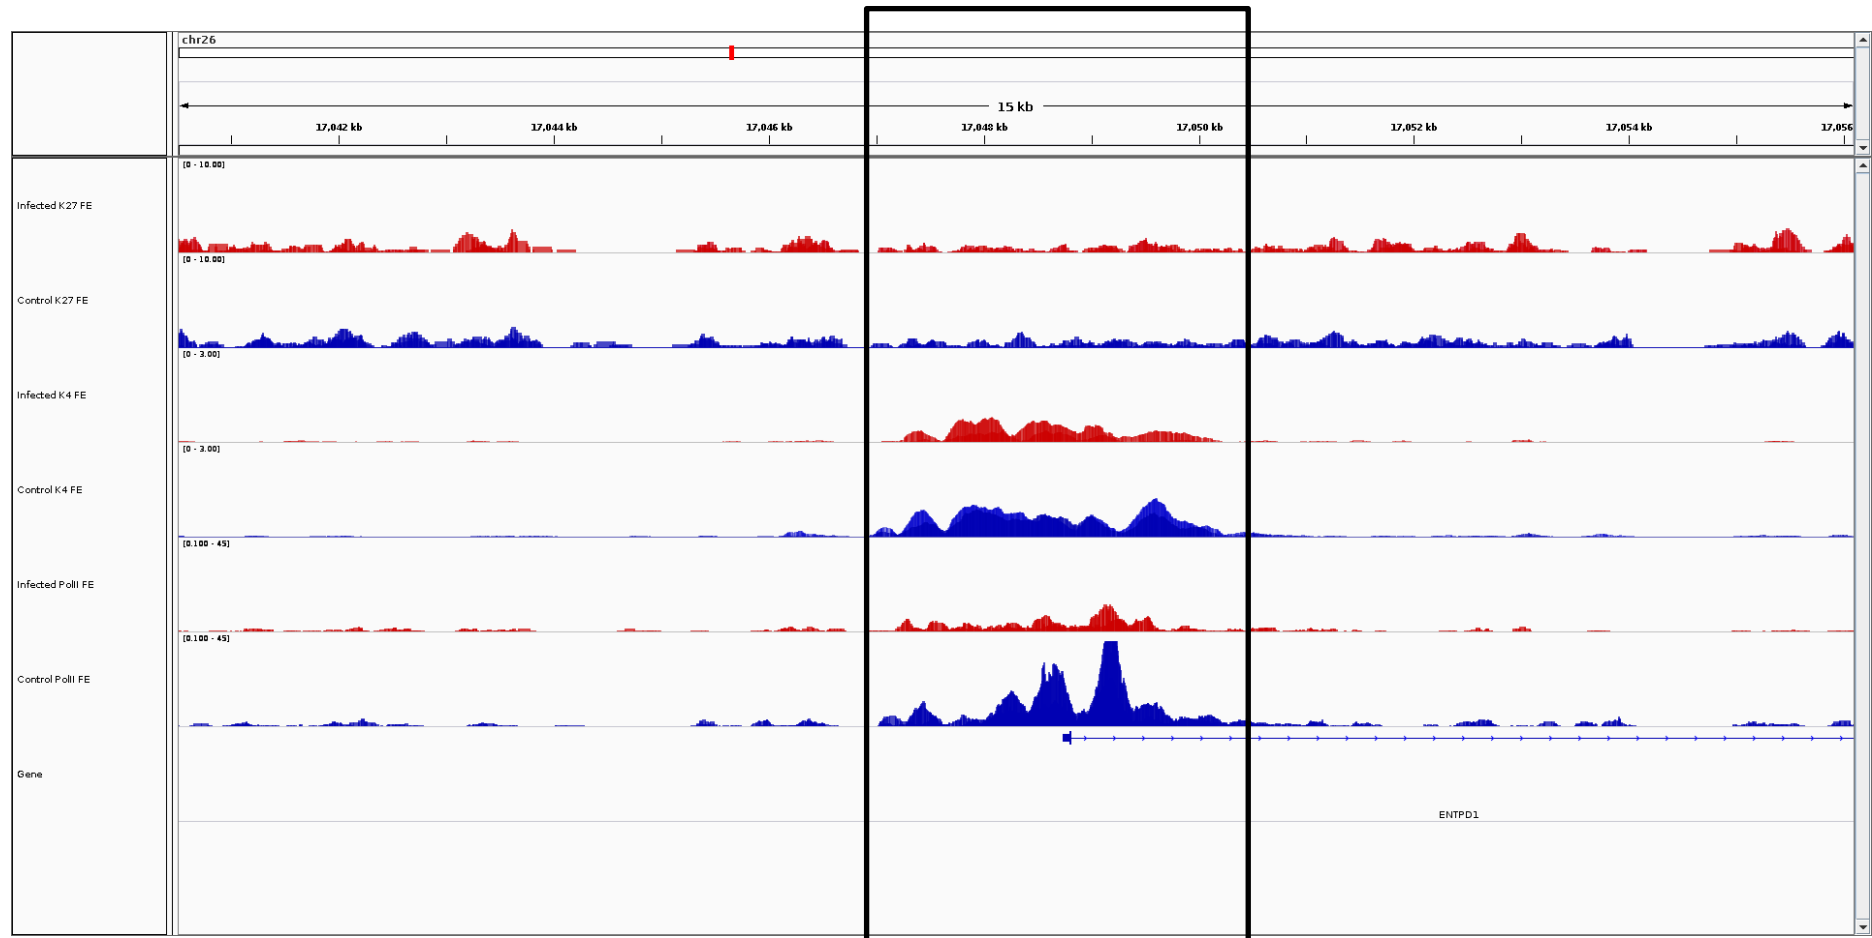

***ENTPD1***

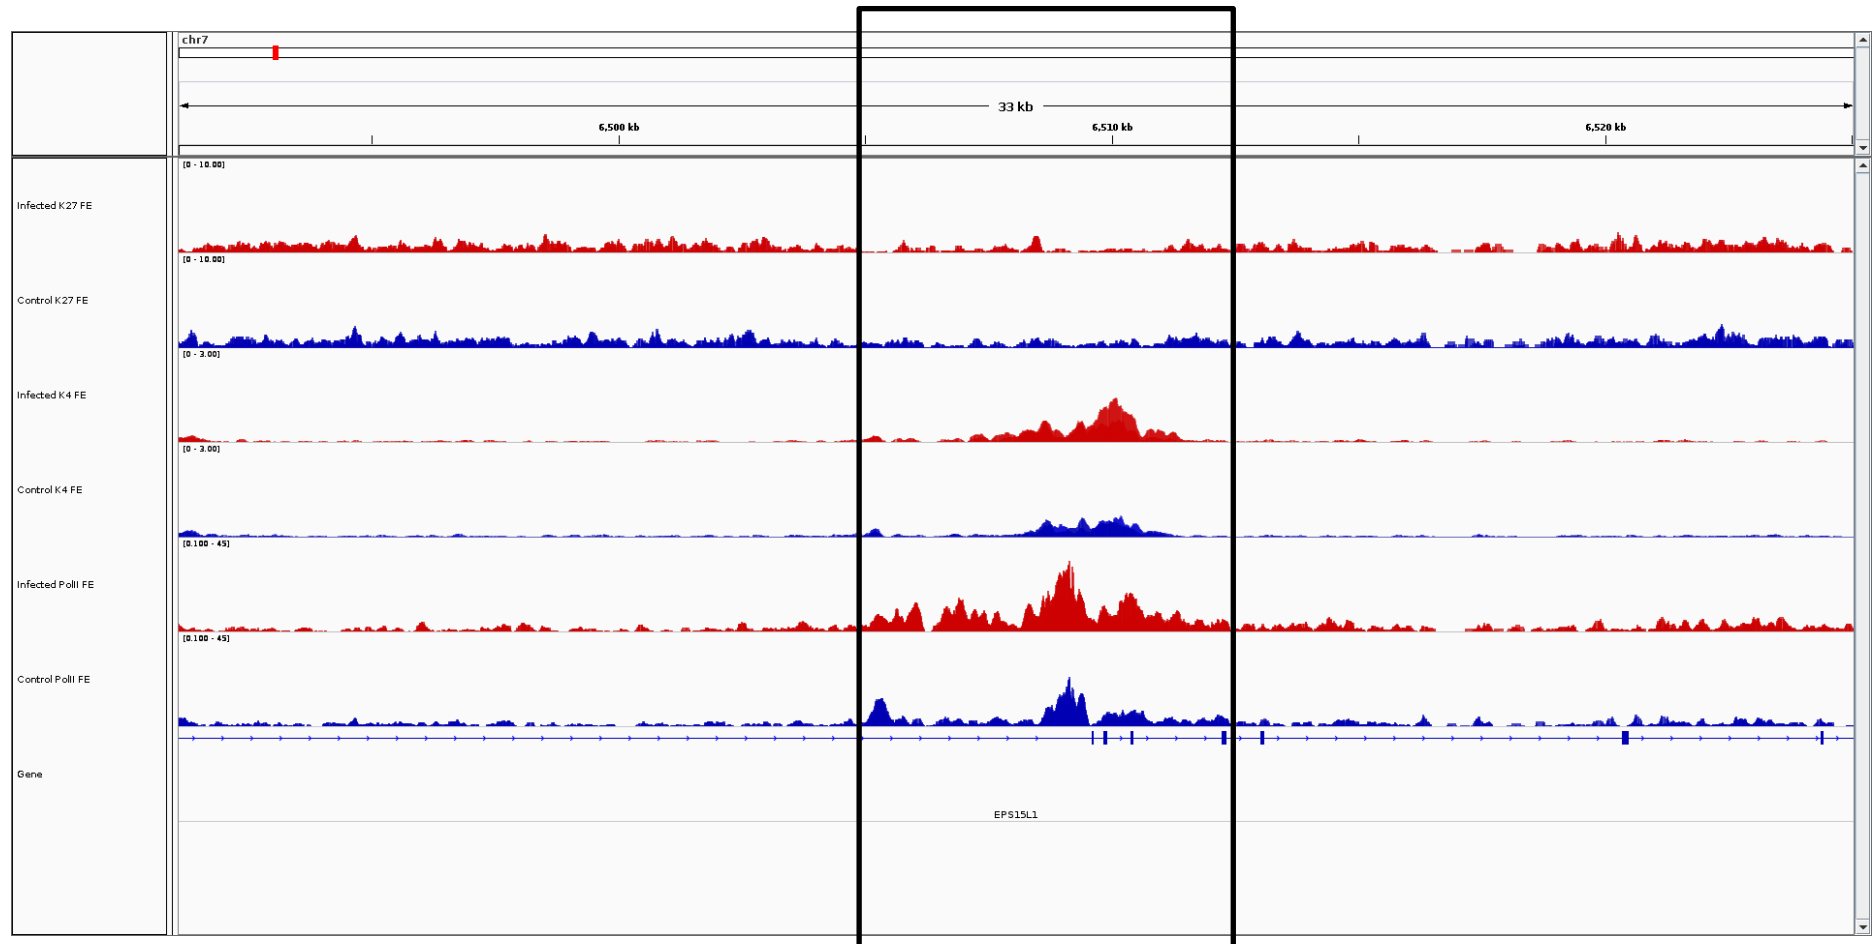

***EPS15L1***

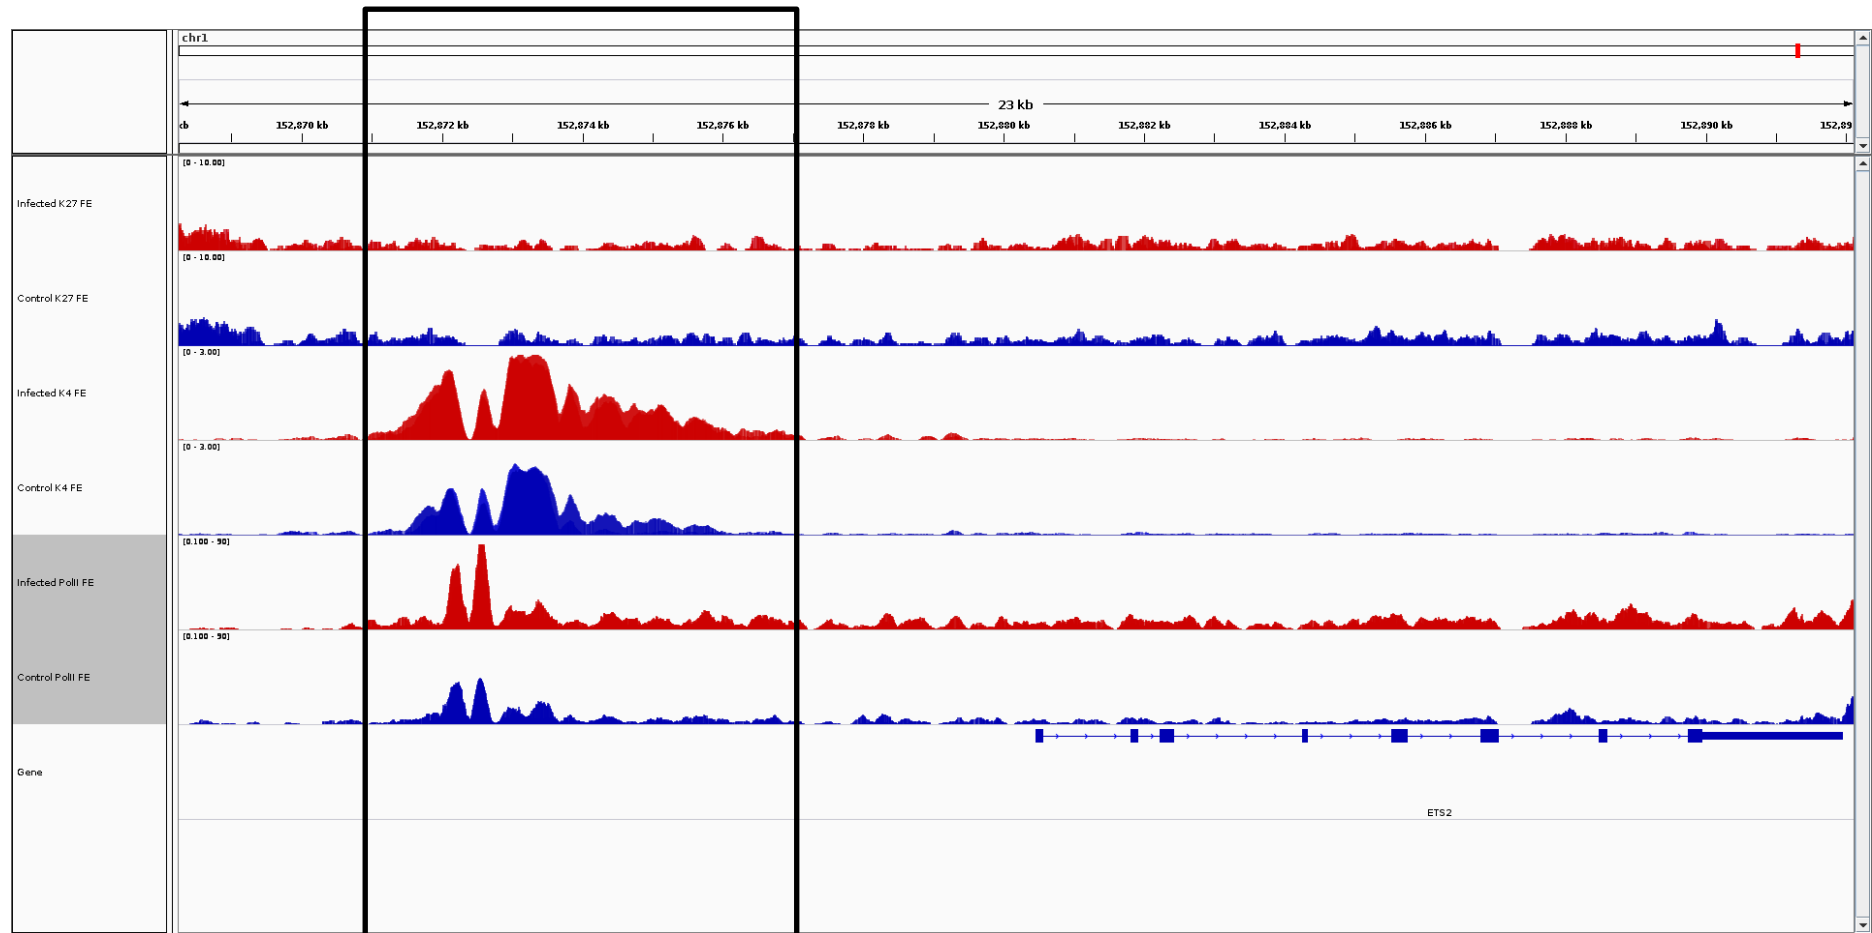

*ETS2*

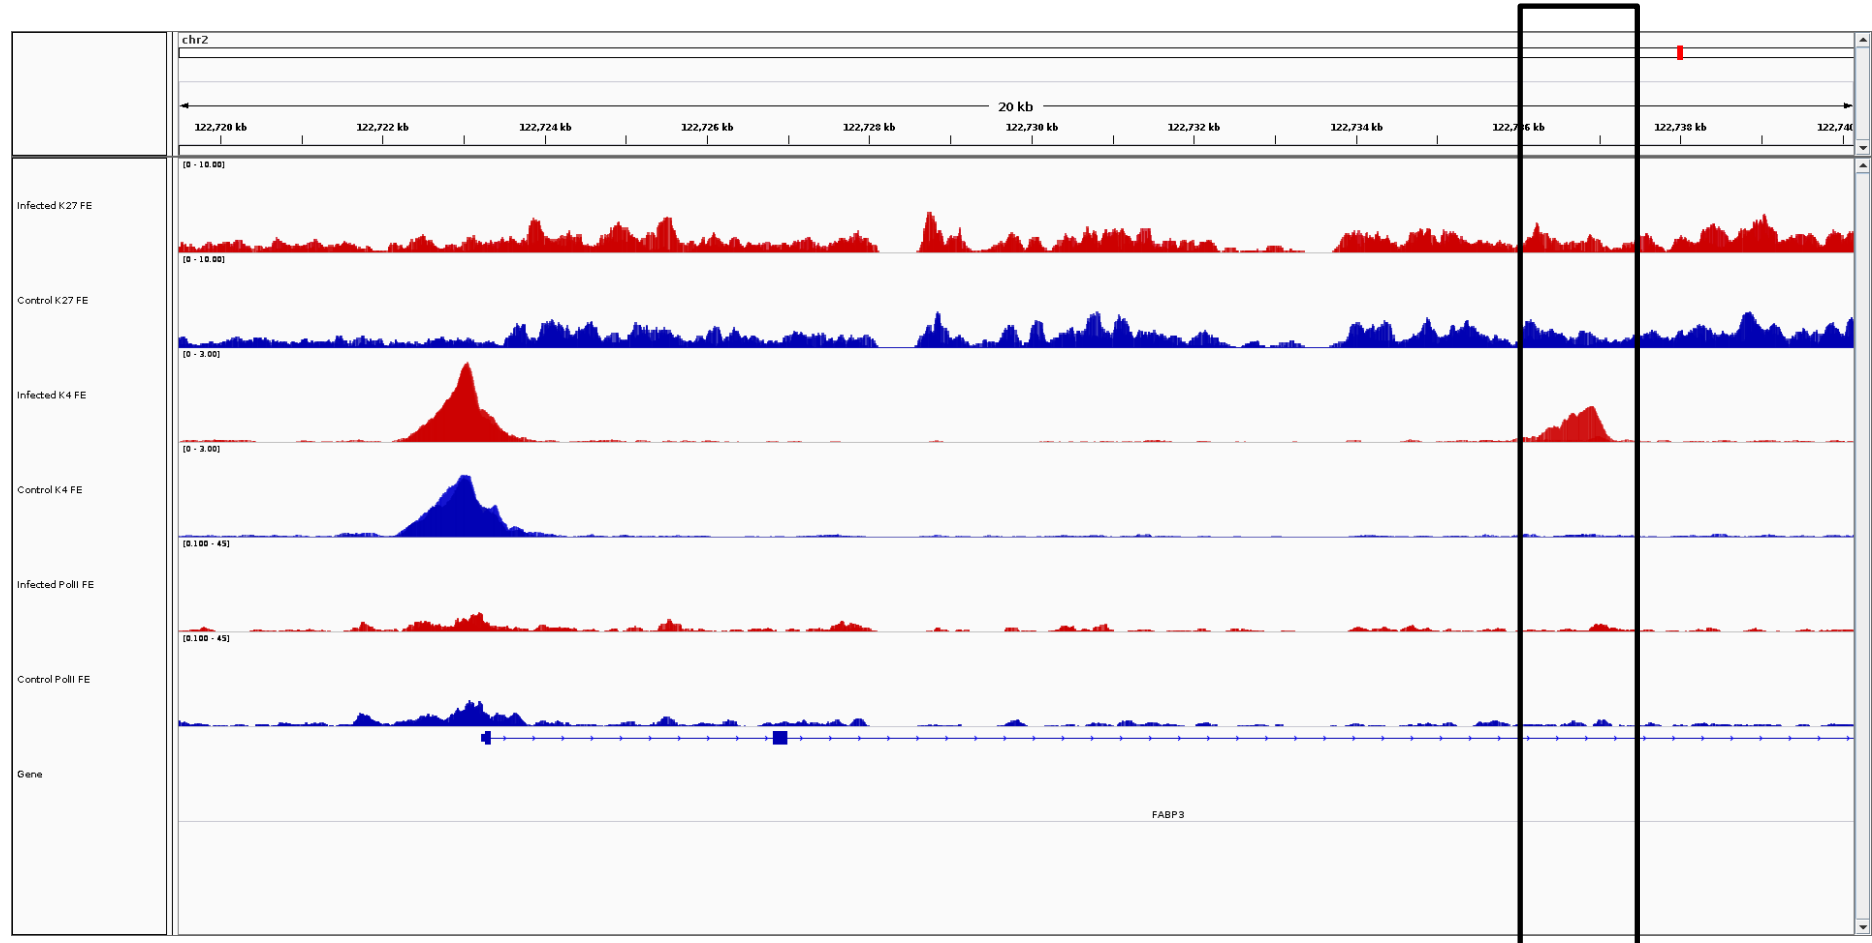

***FABP3***

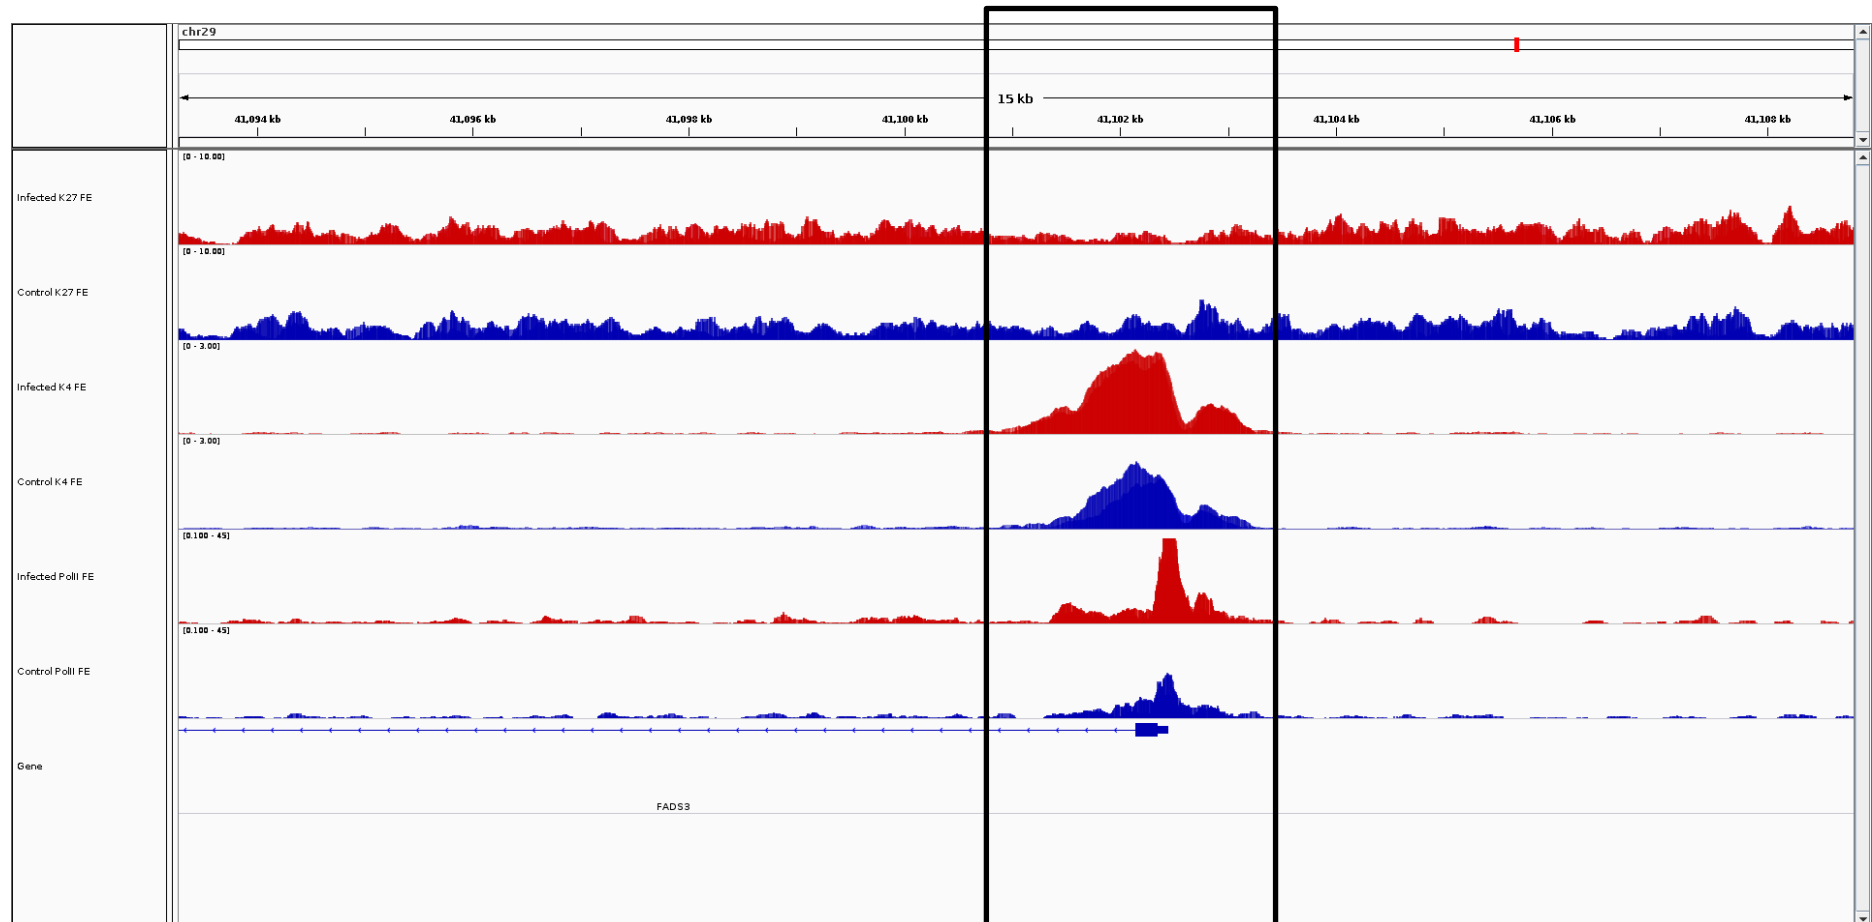

***FADS3***

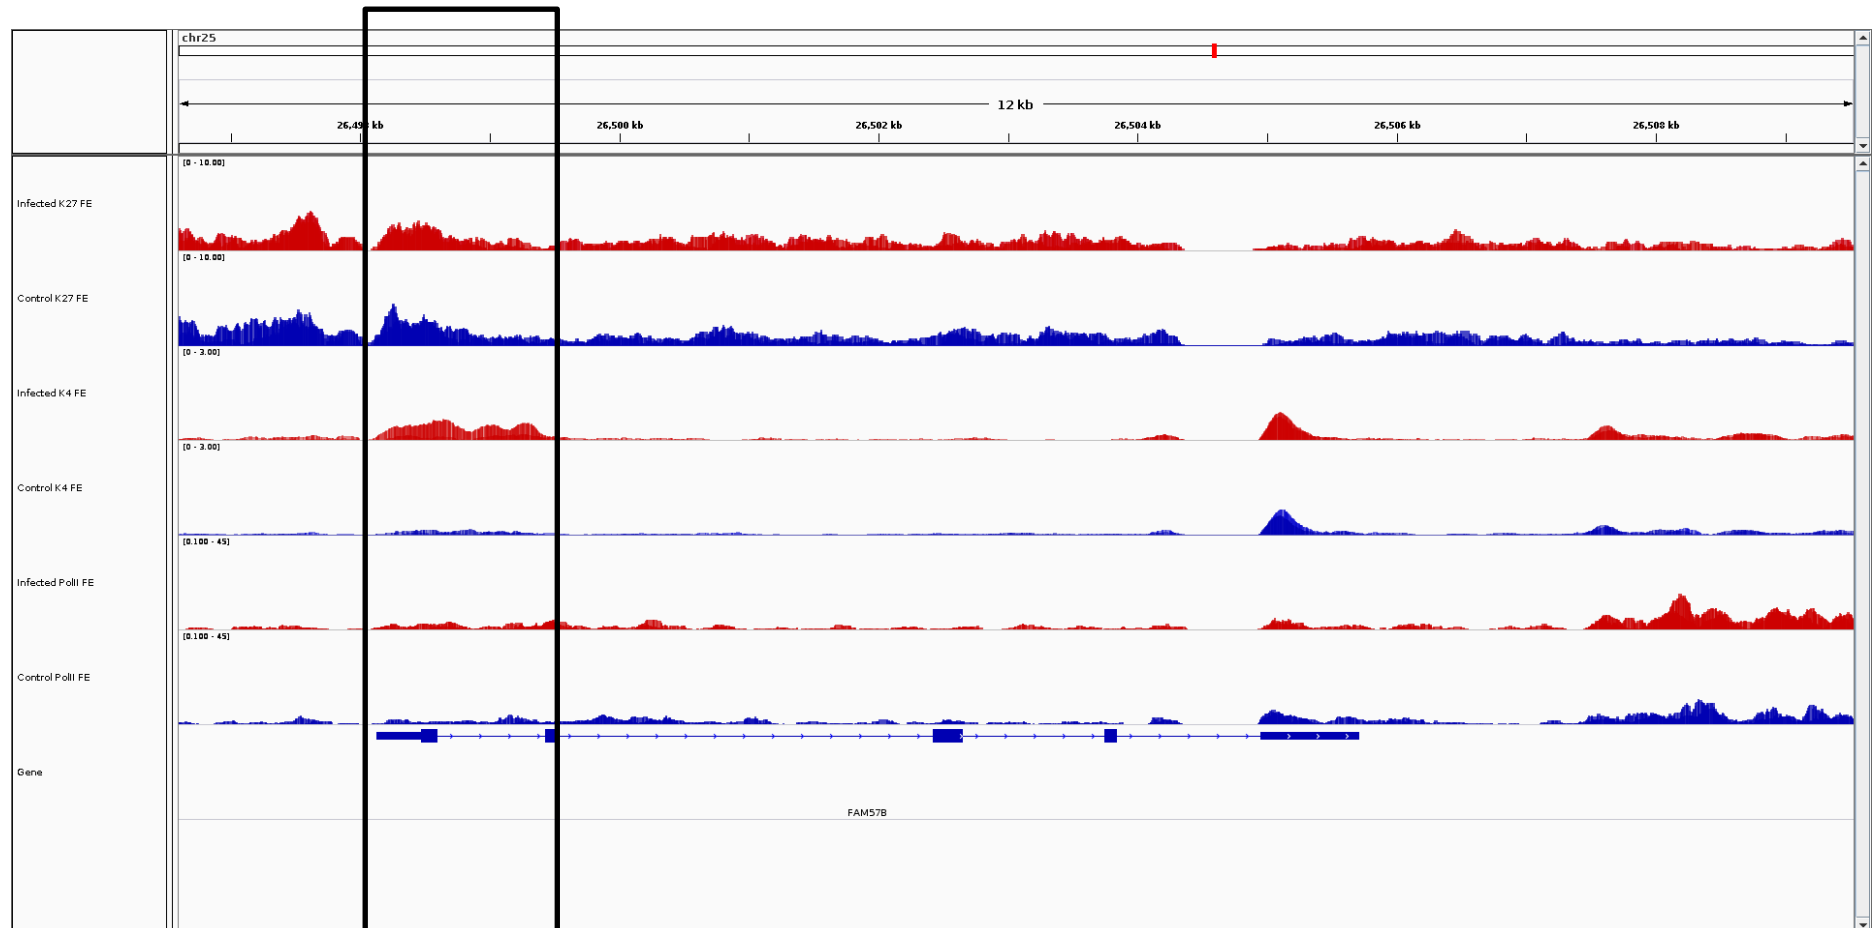

***FAM57B***

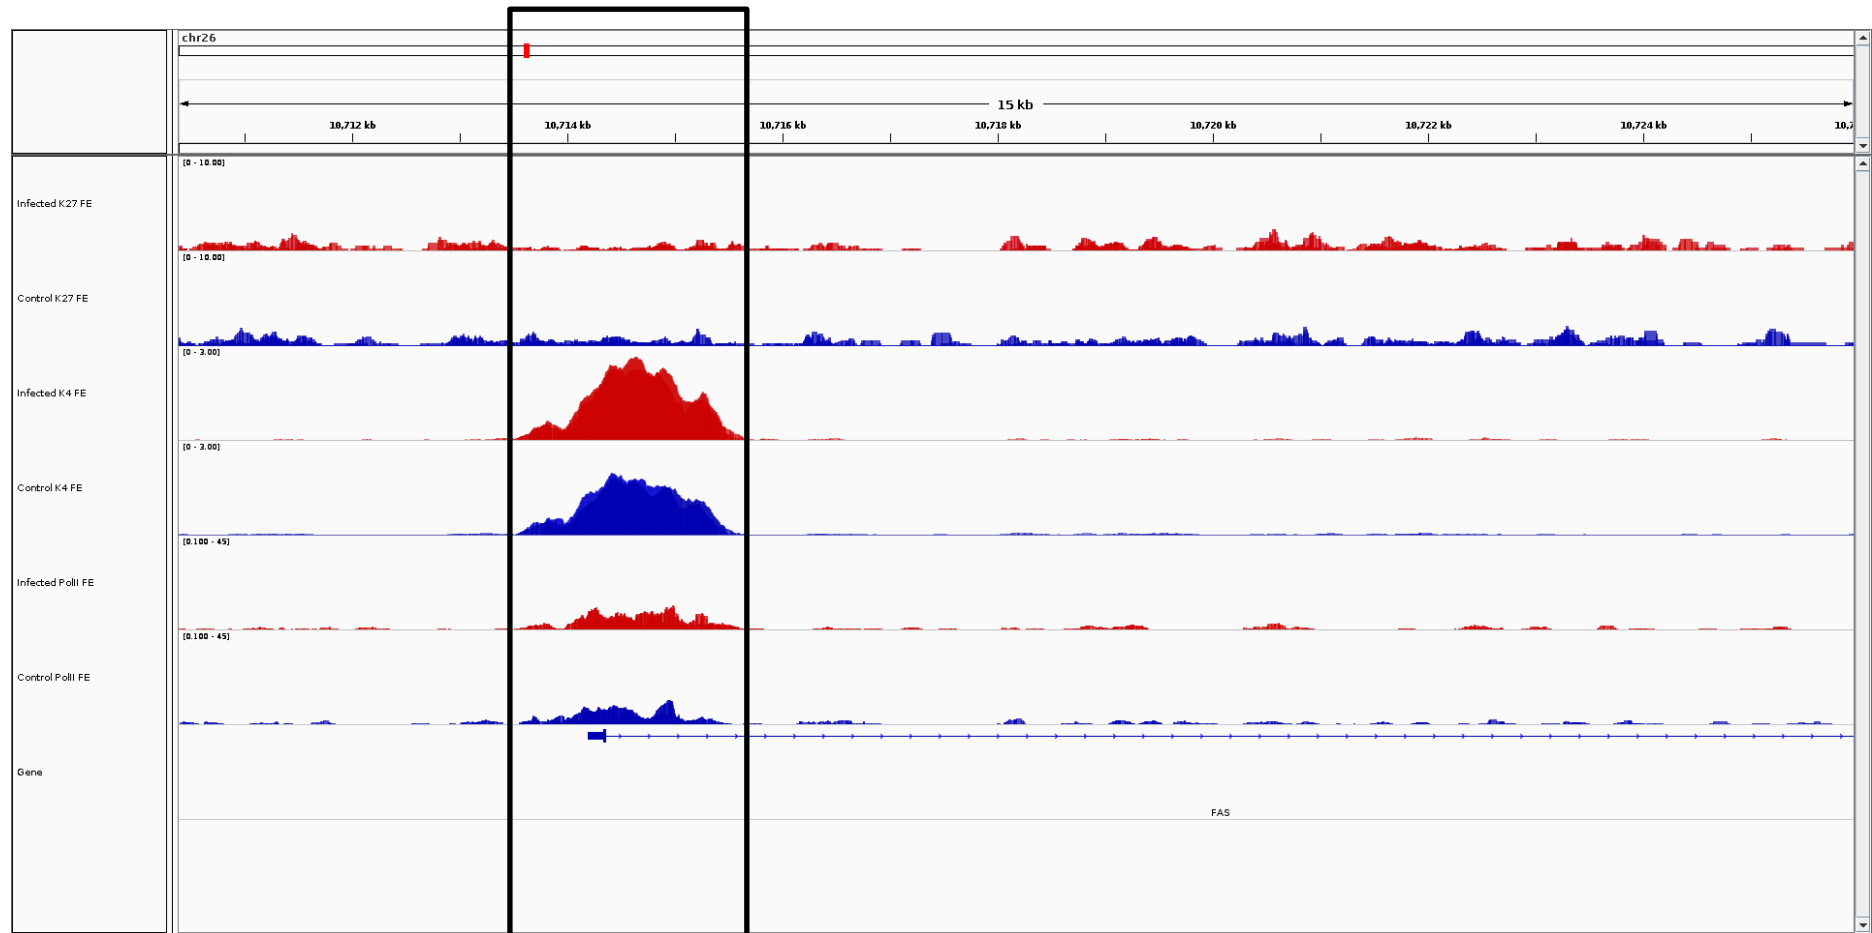

*FAS*

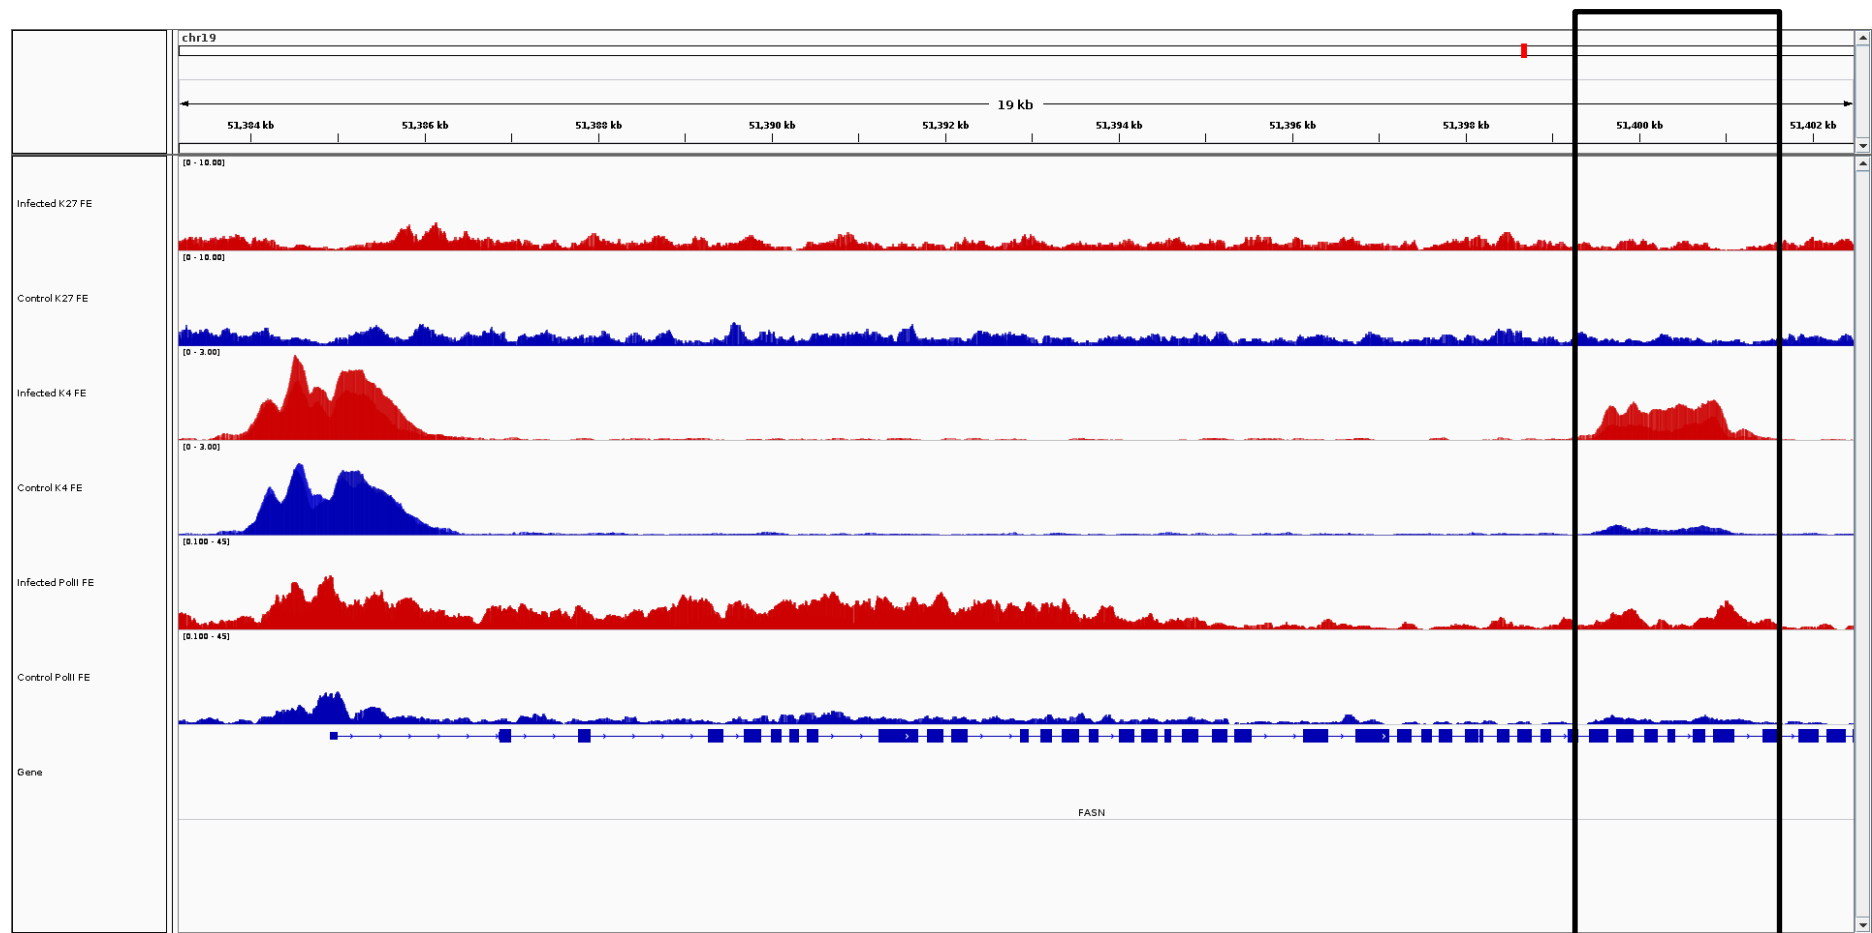

*FASN*



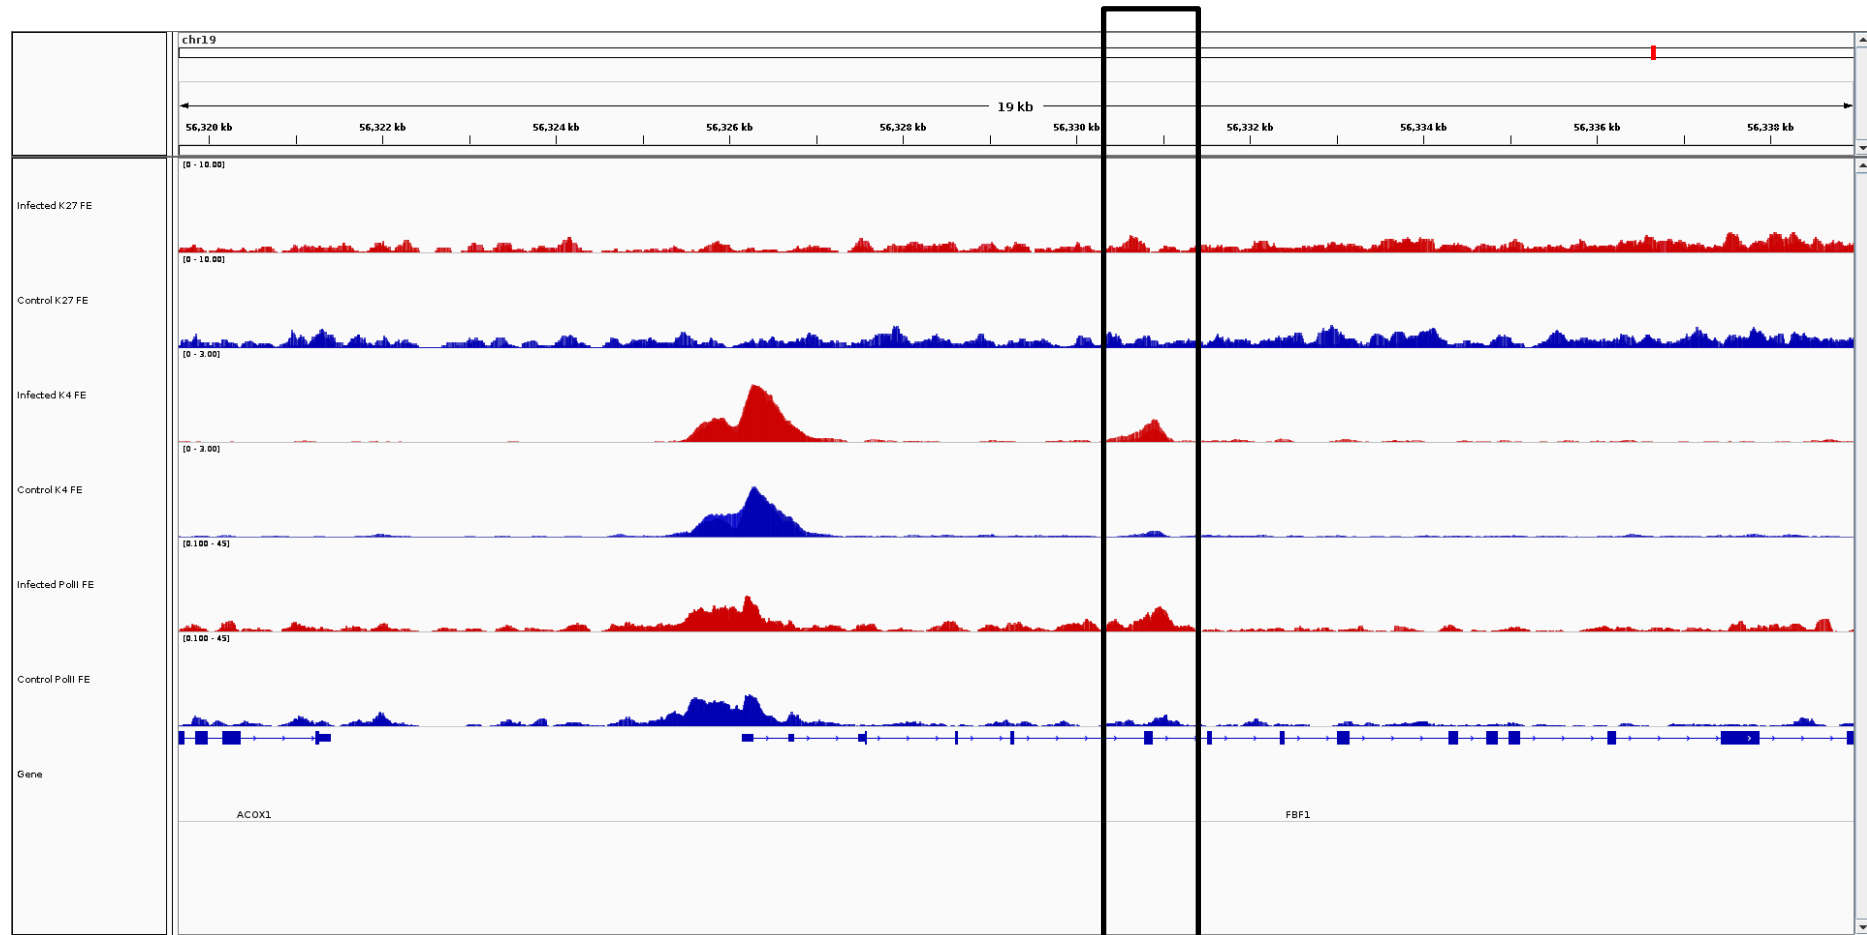

***FBF1***

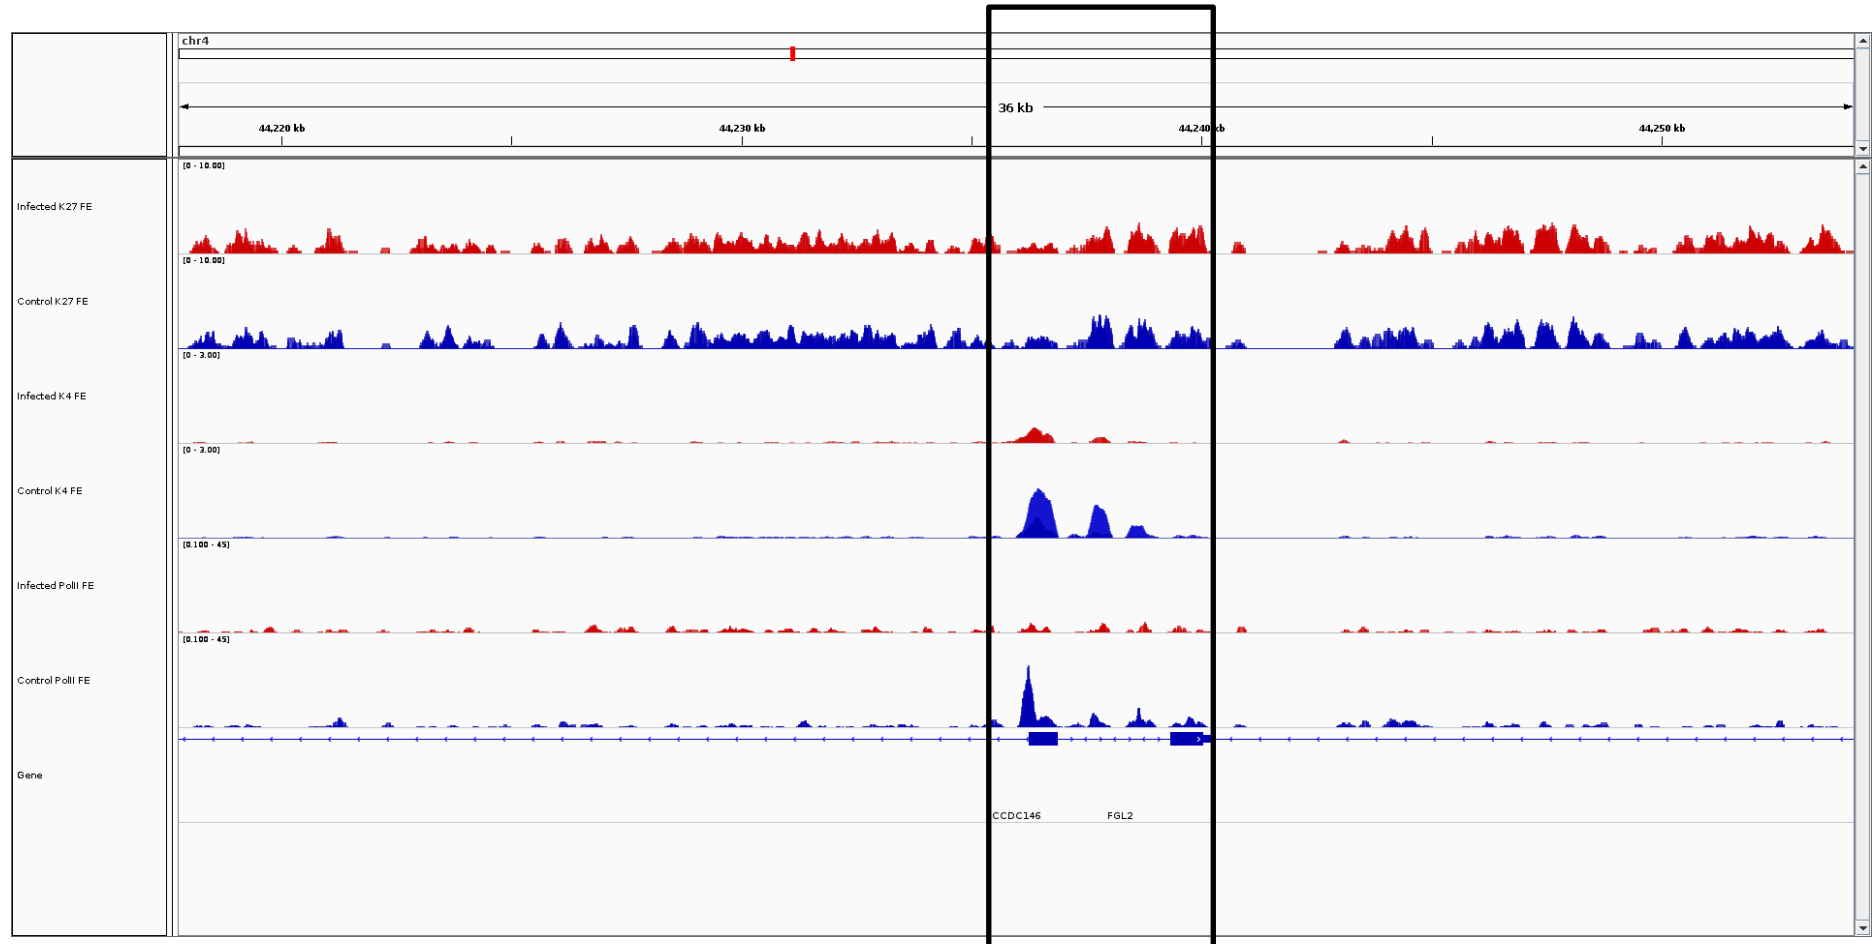

***FGL2***

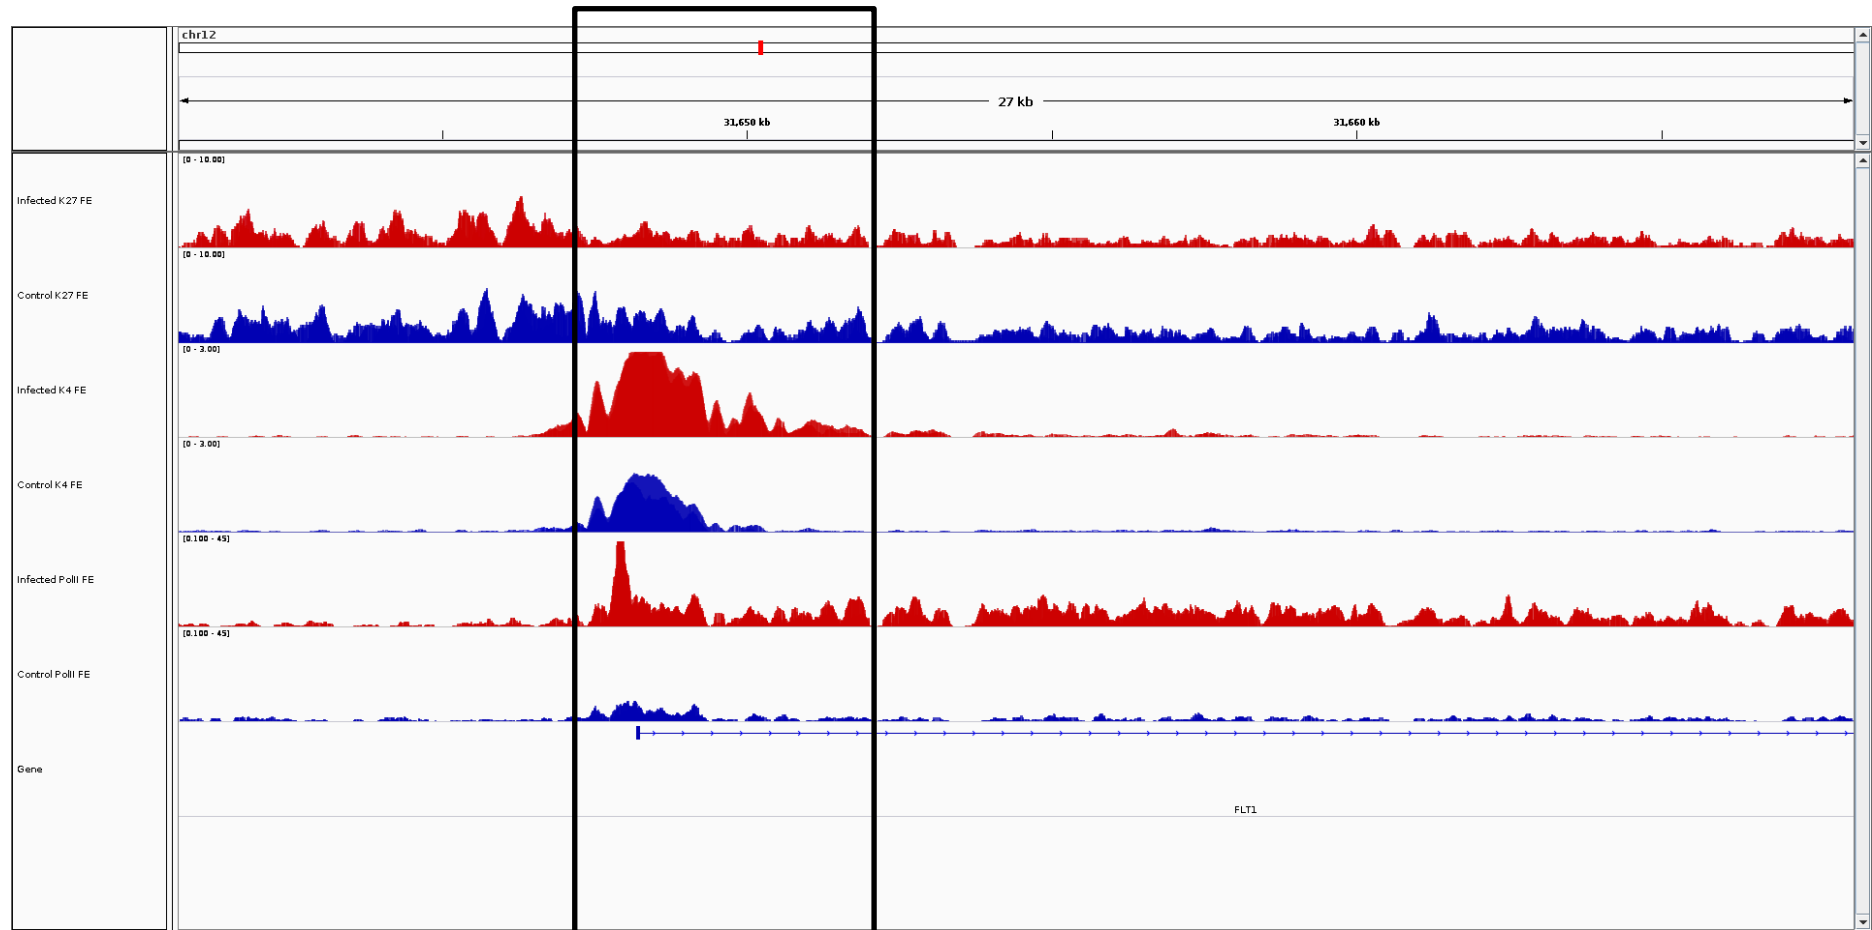

***FLT1***

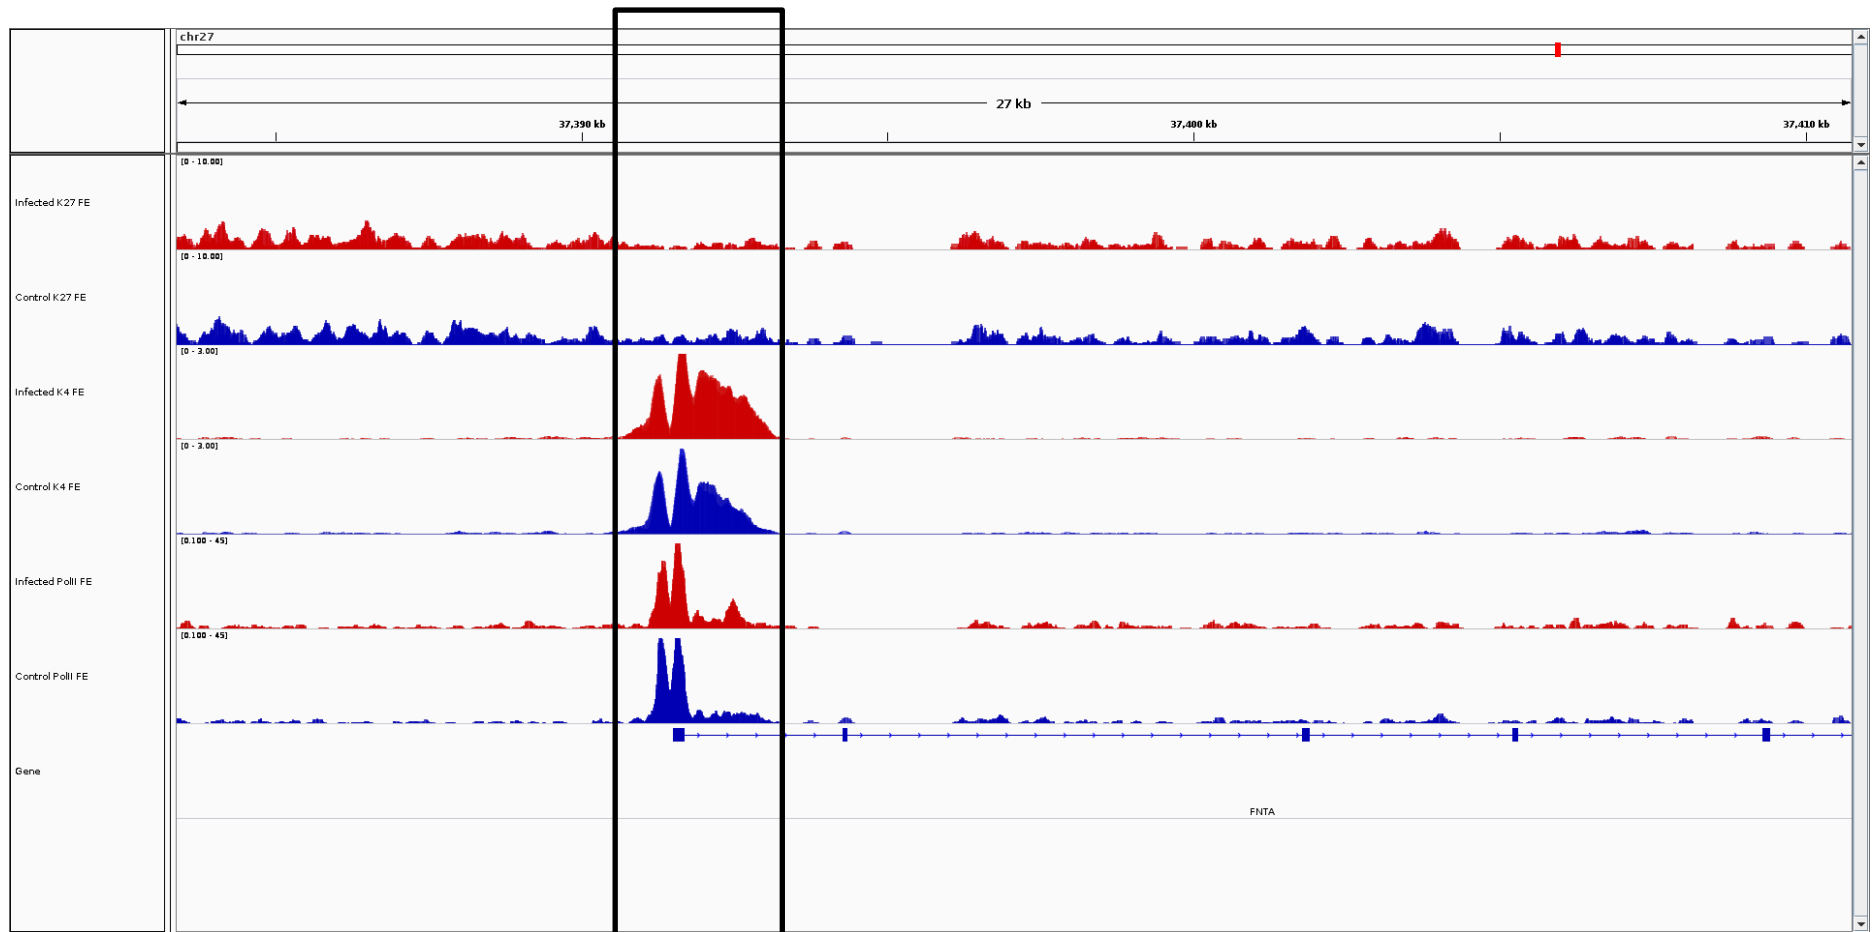

***FNTA***

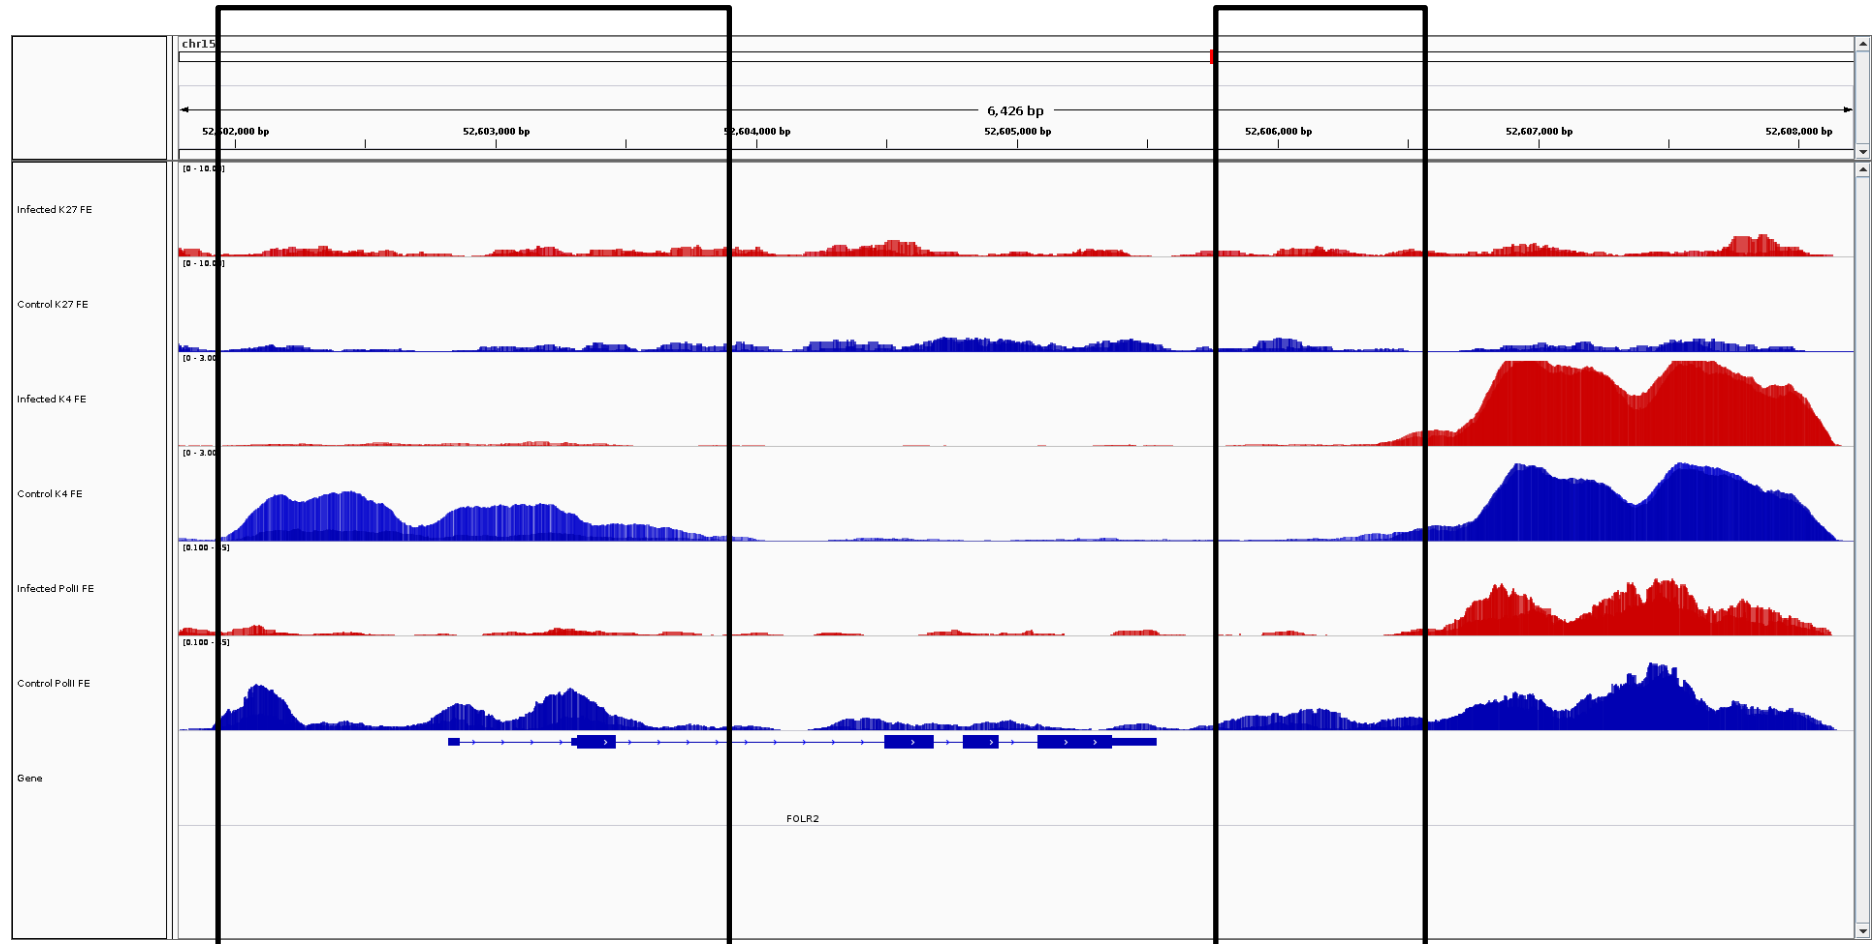

***FOLR2***

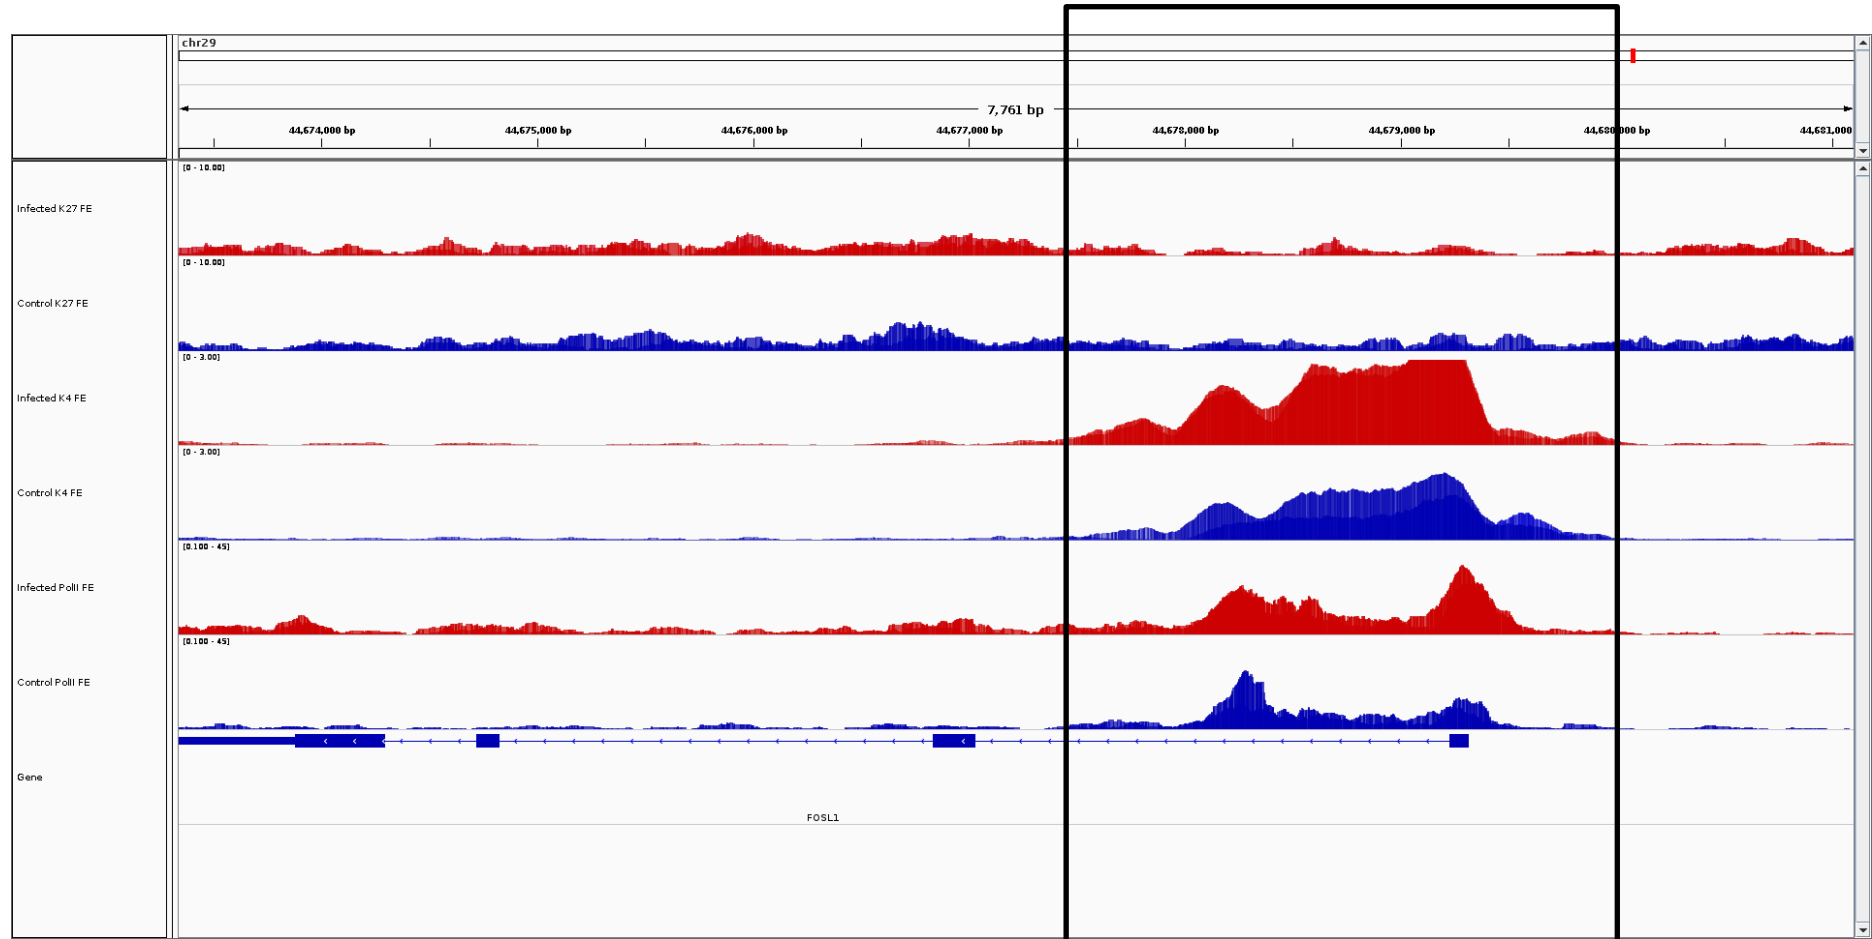

*FOSL1*

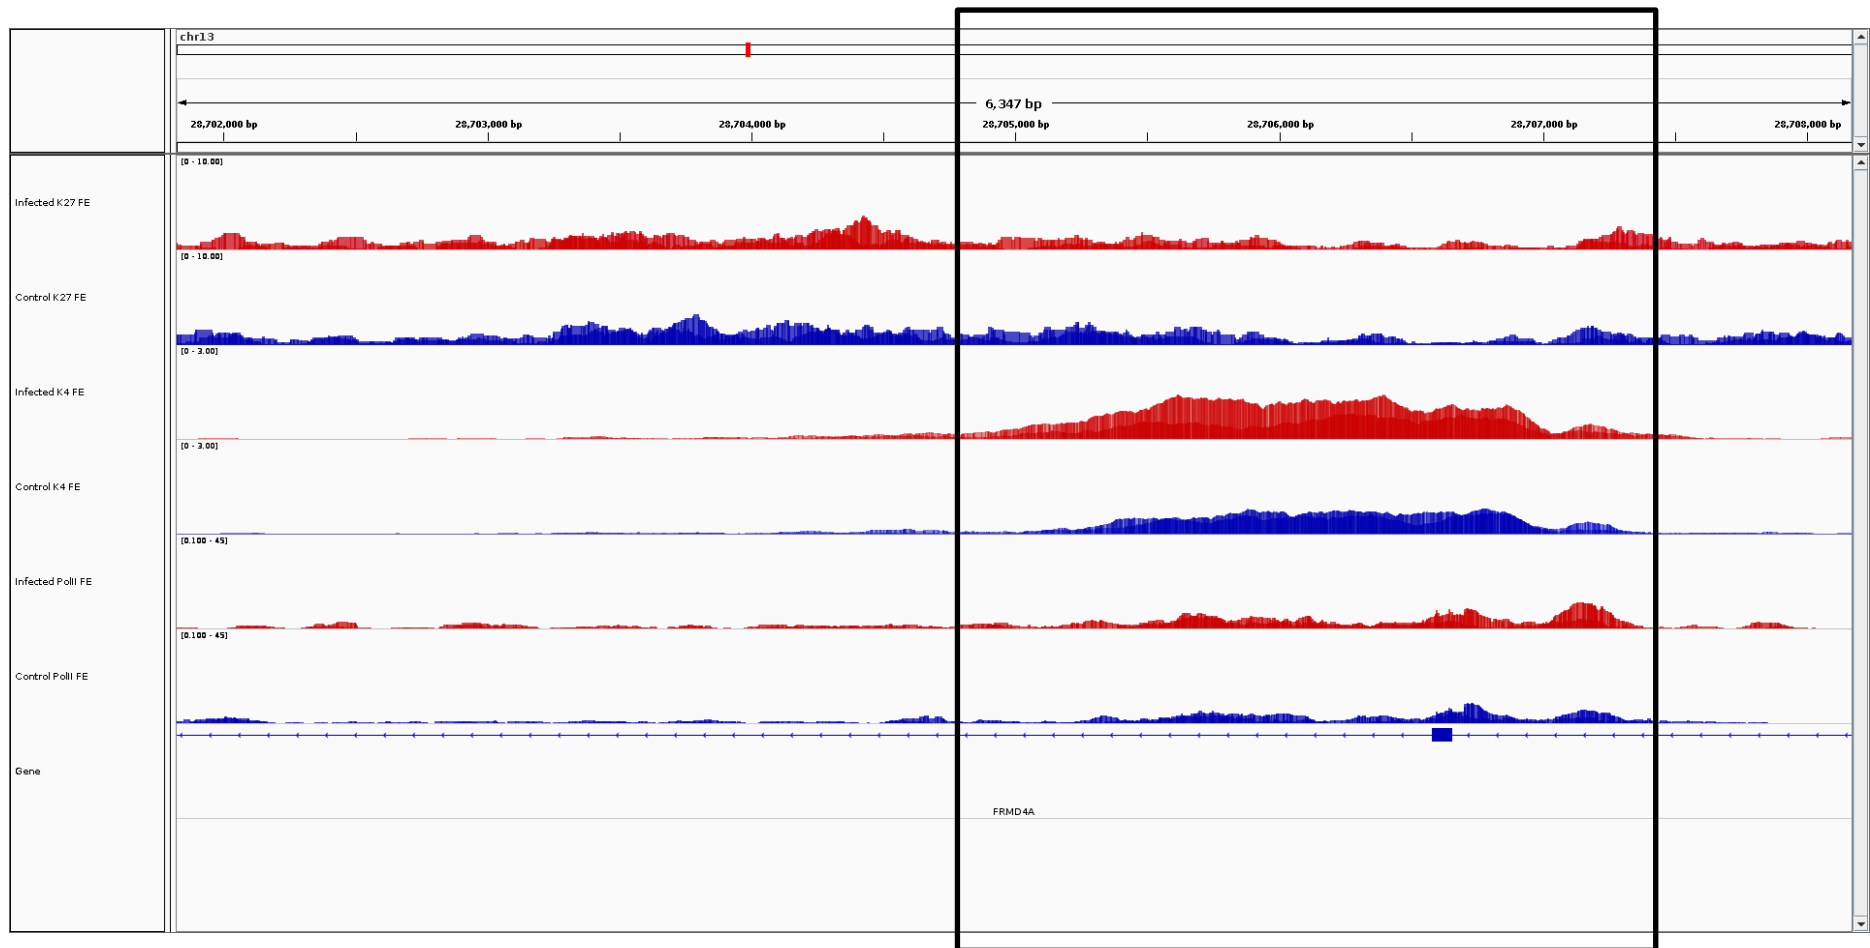

***FRMD4A***

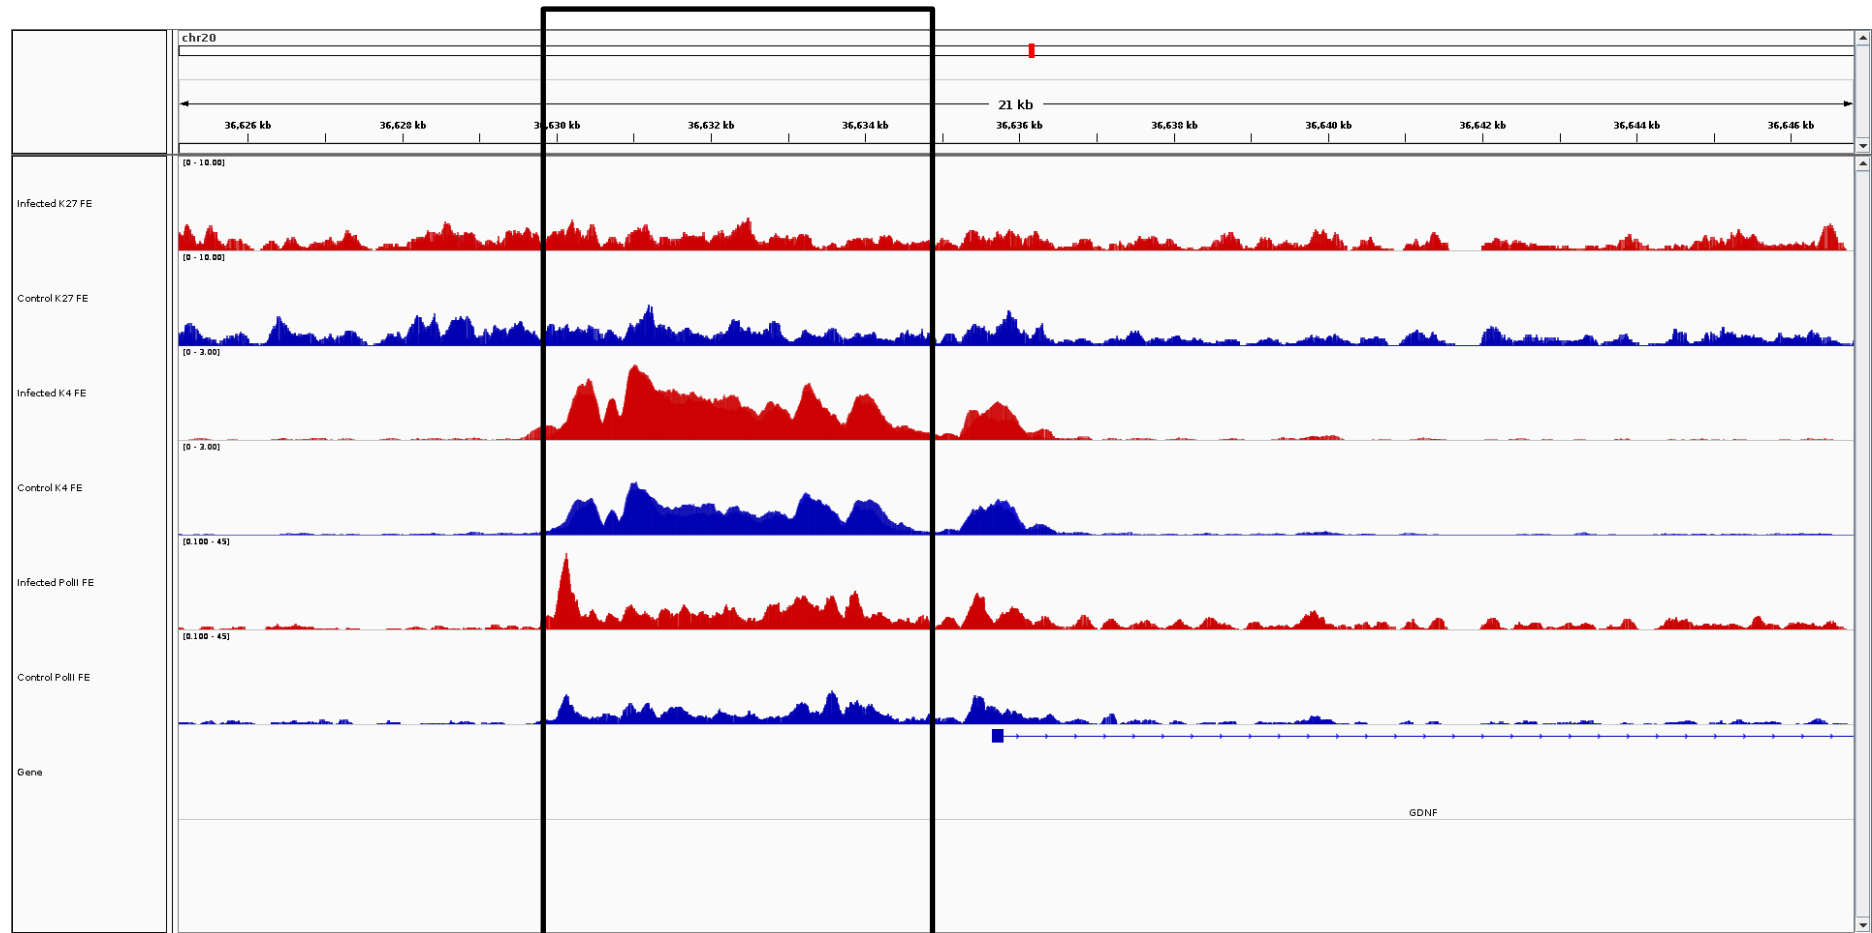

***GDNF***



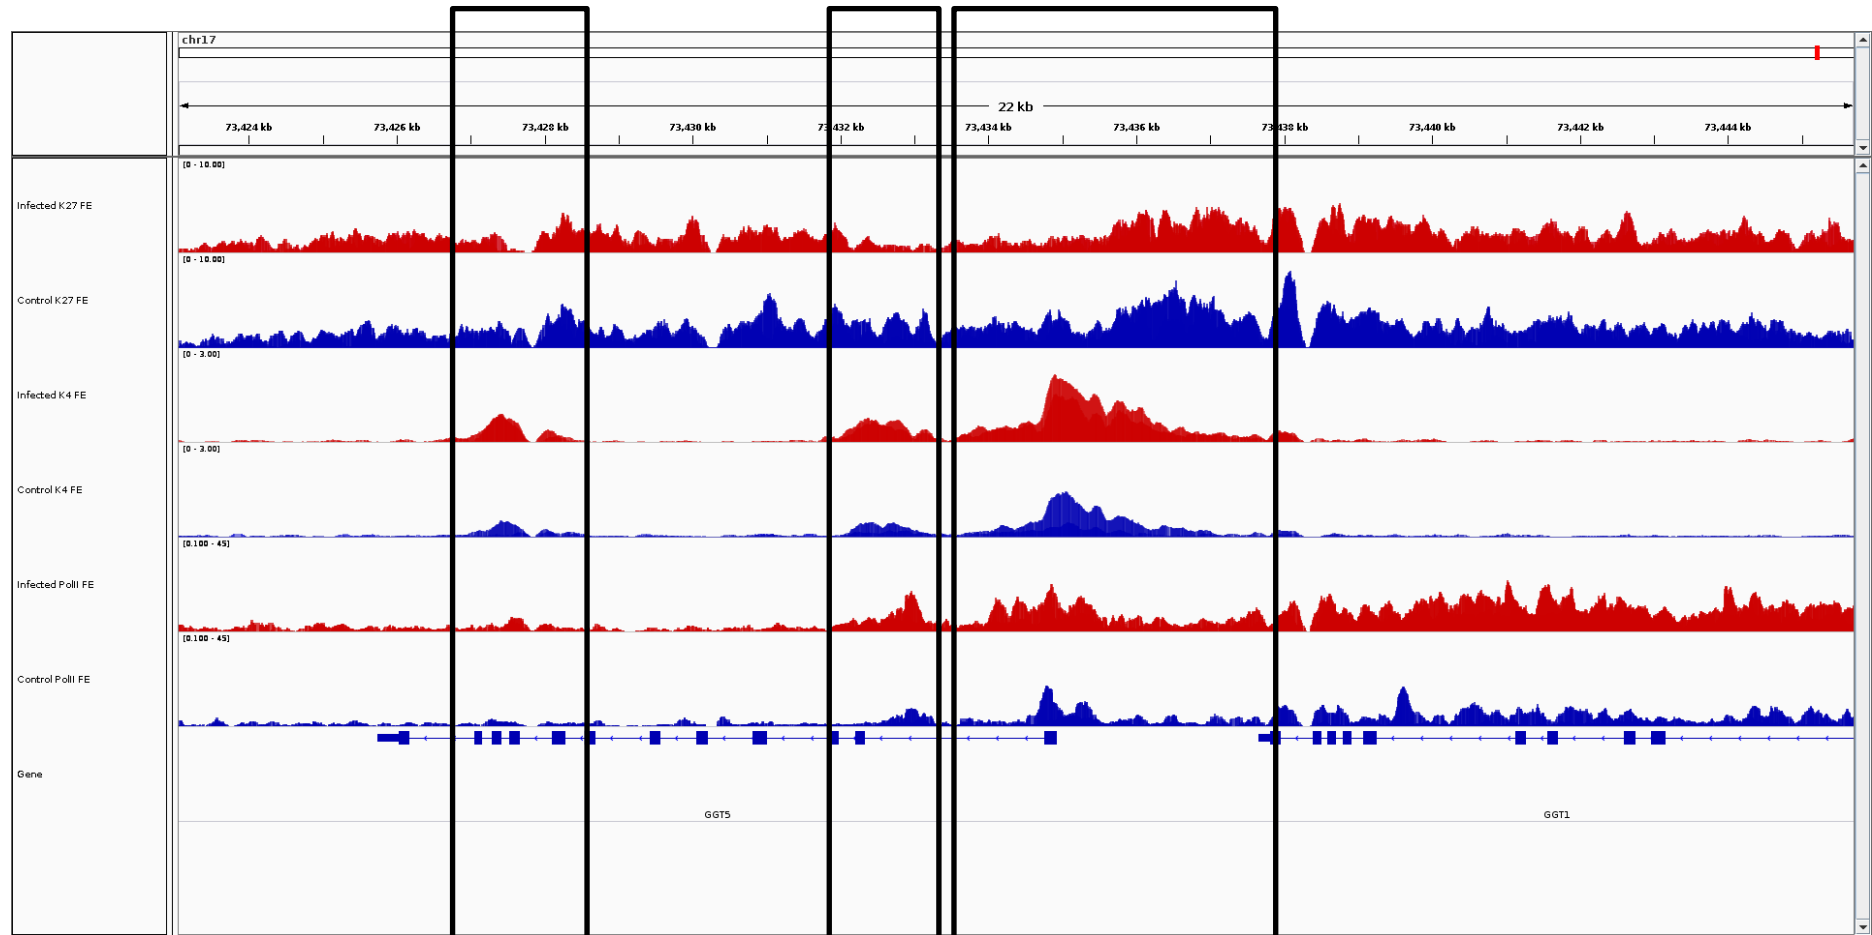

***GGT5, GGT1***

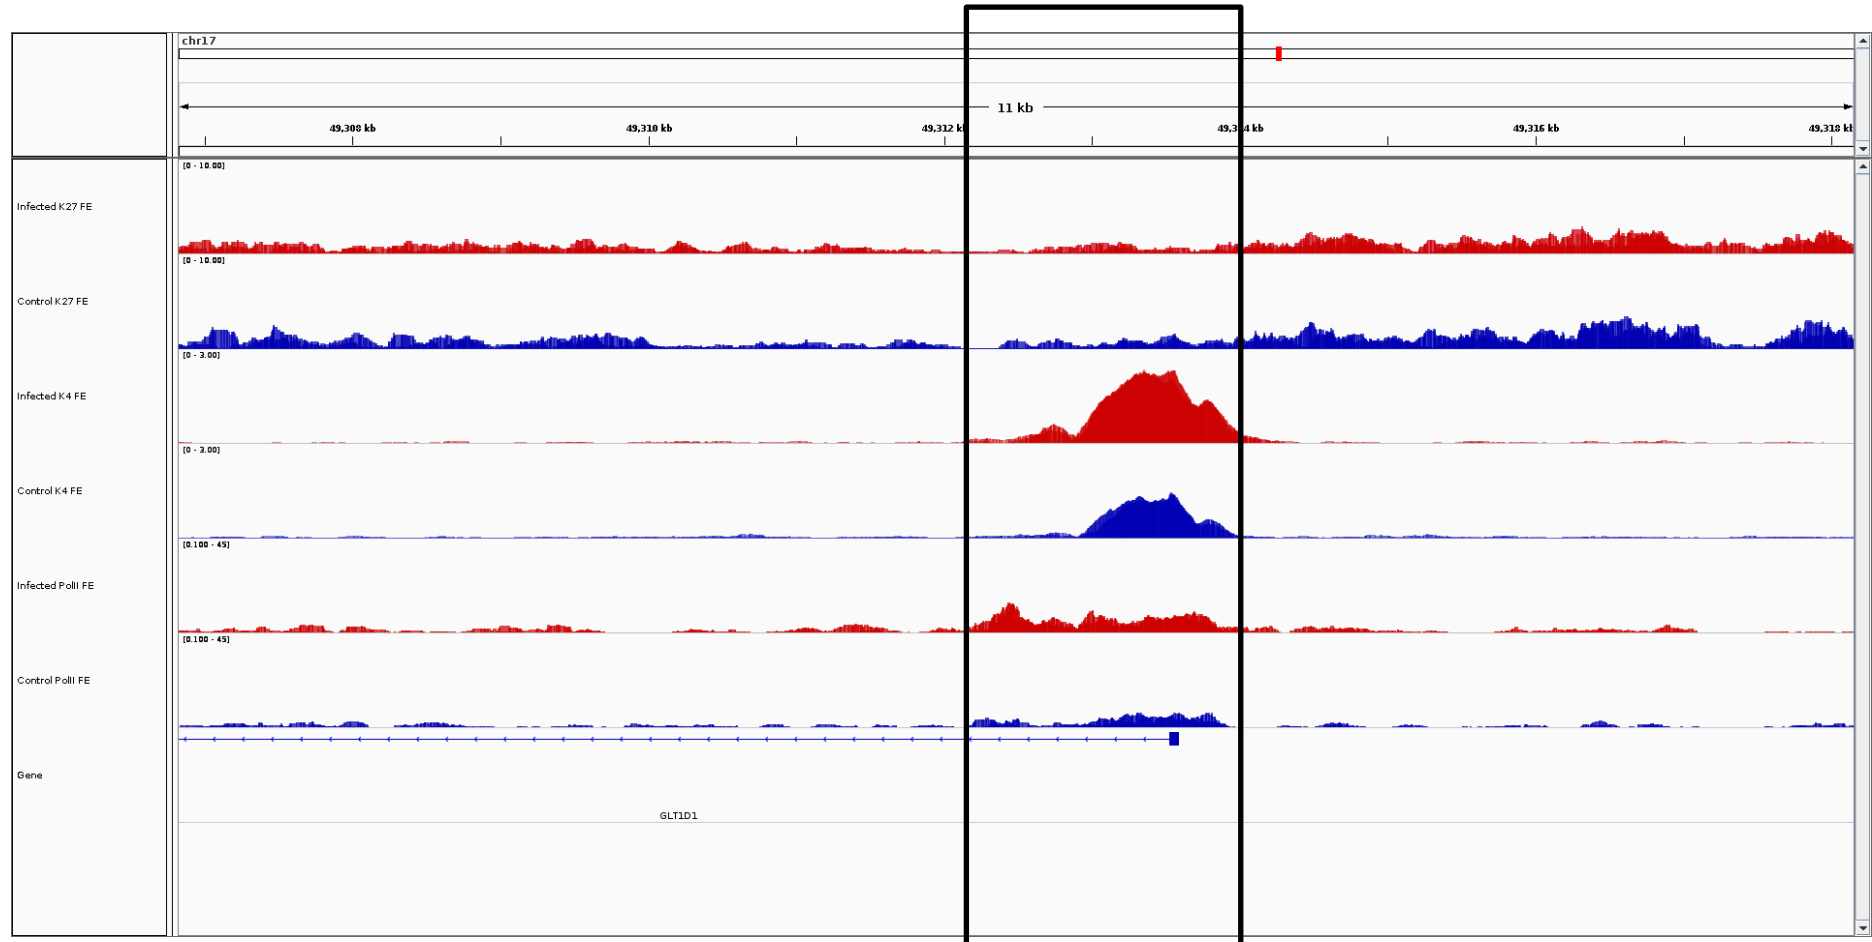

***GLT1D1***

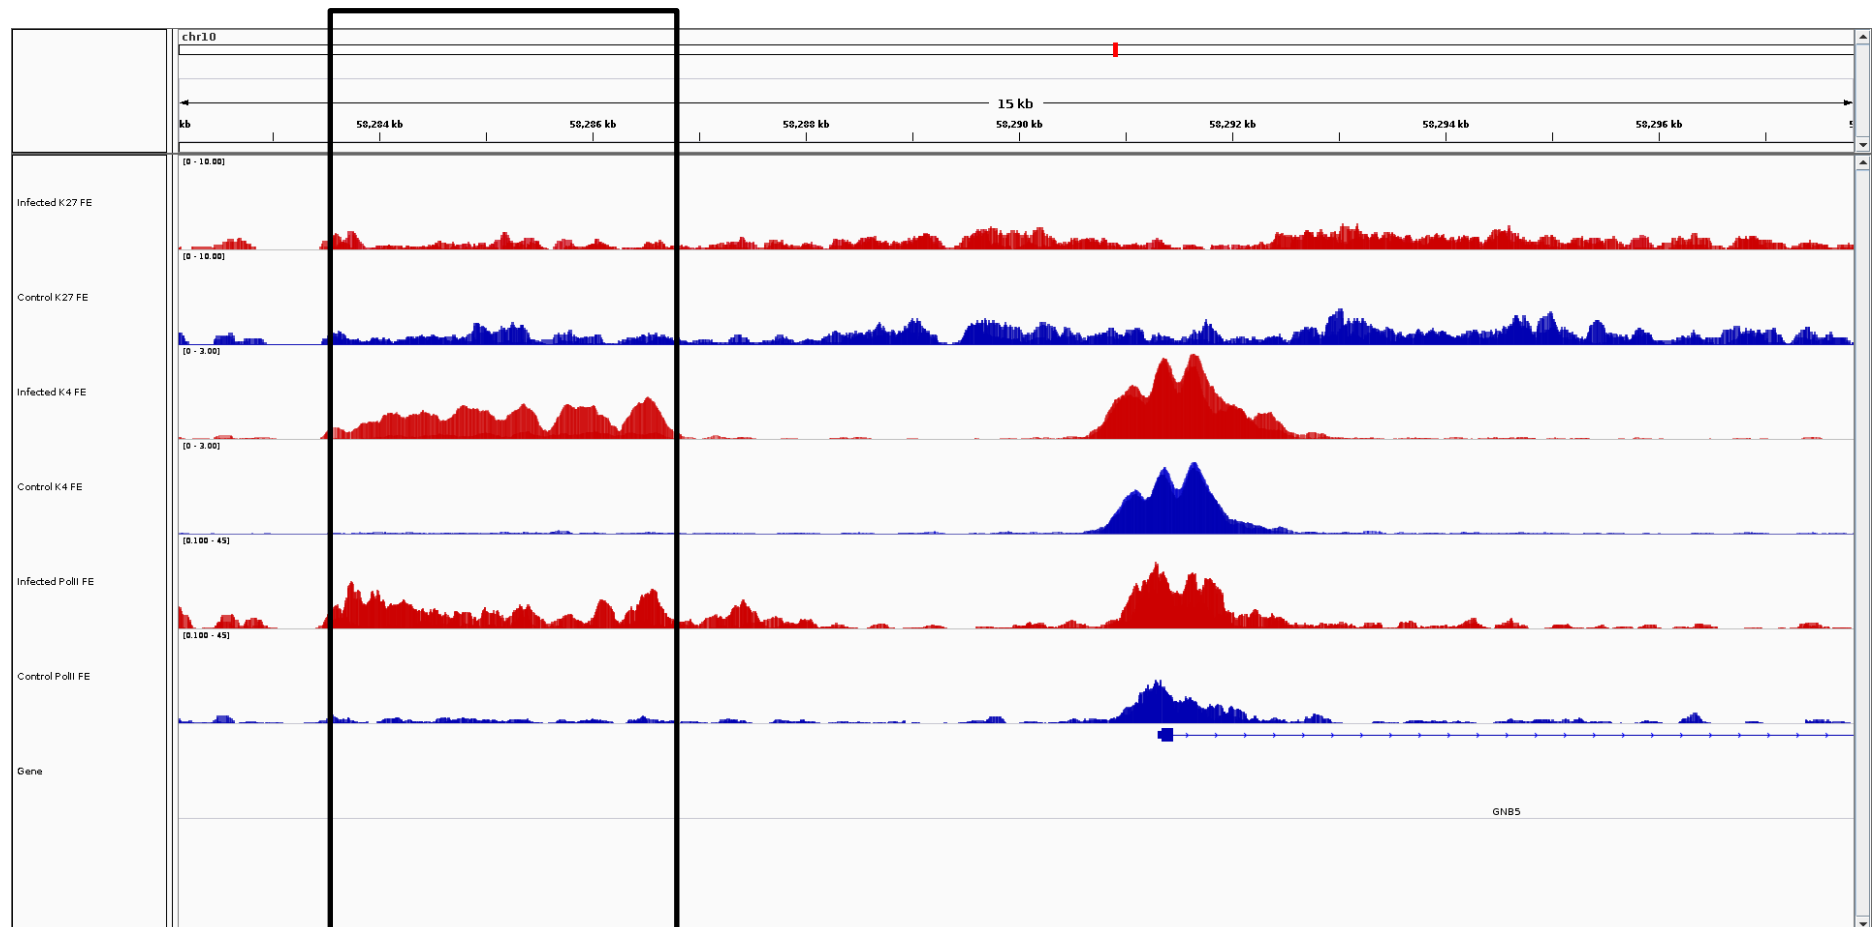

***GNB5***

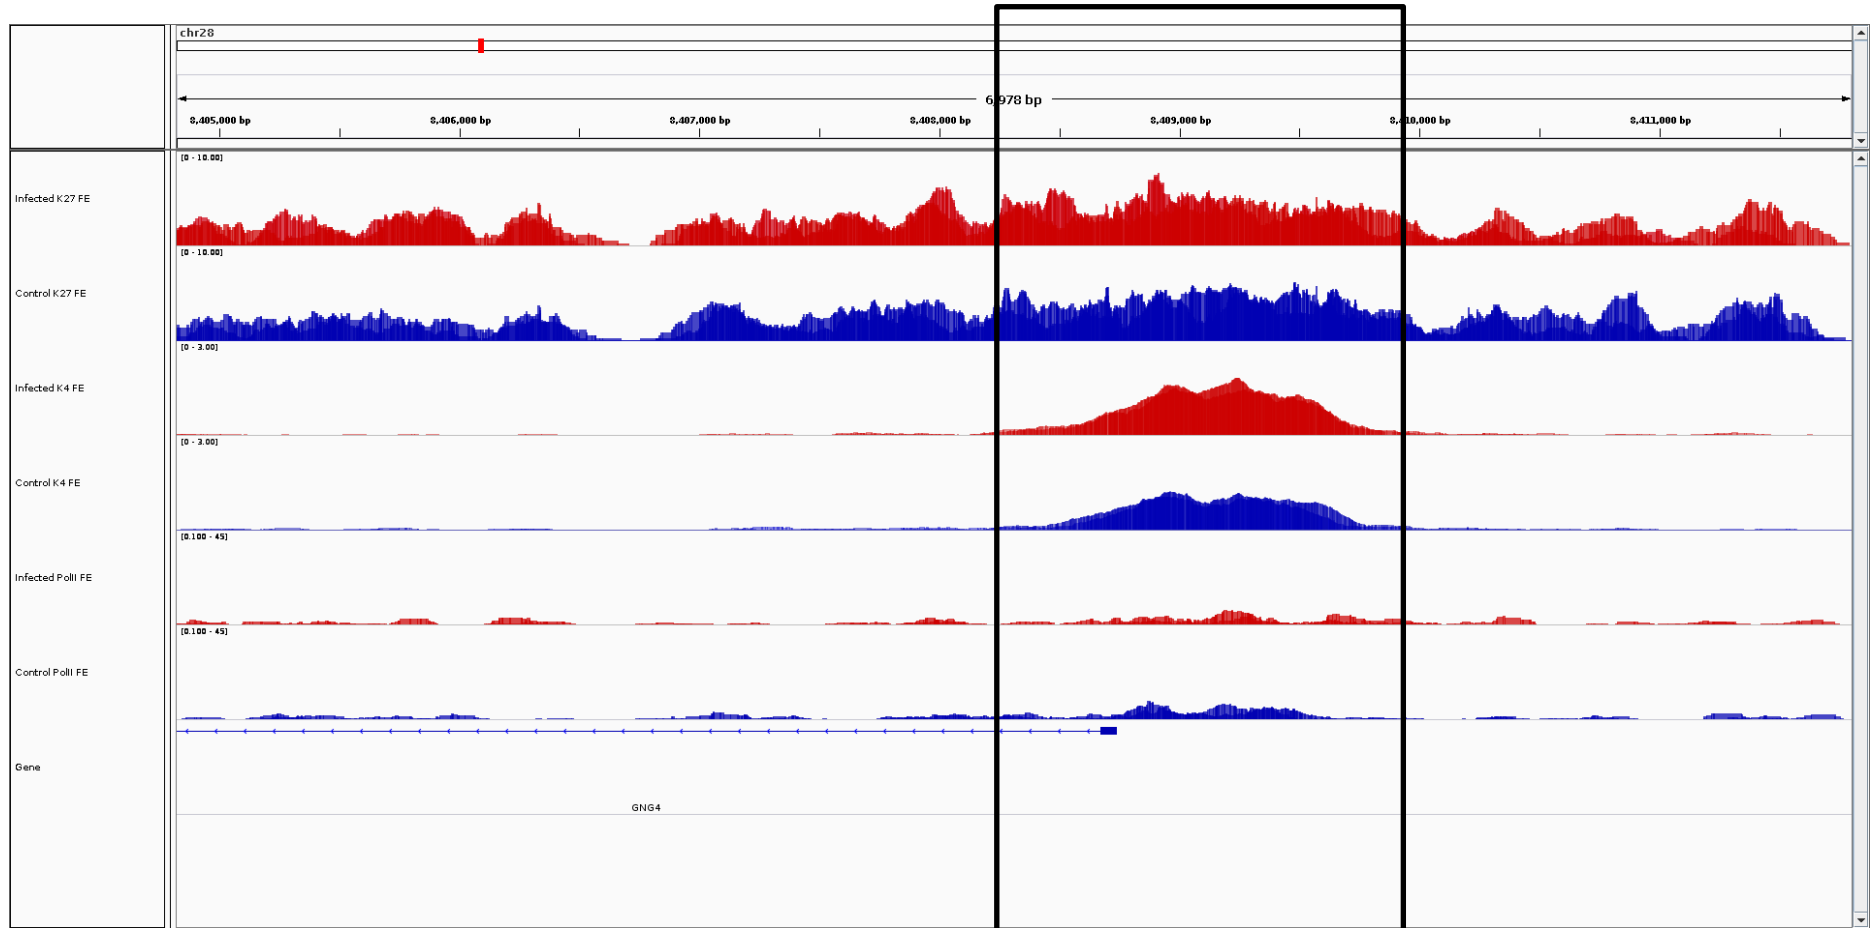

***GNG4***

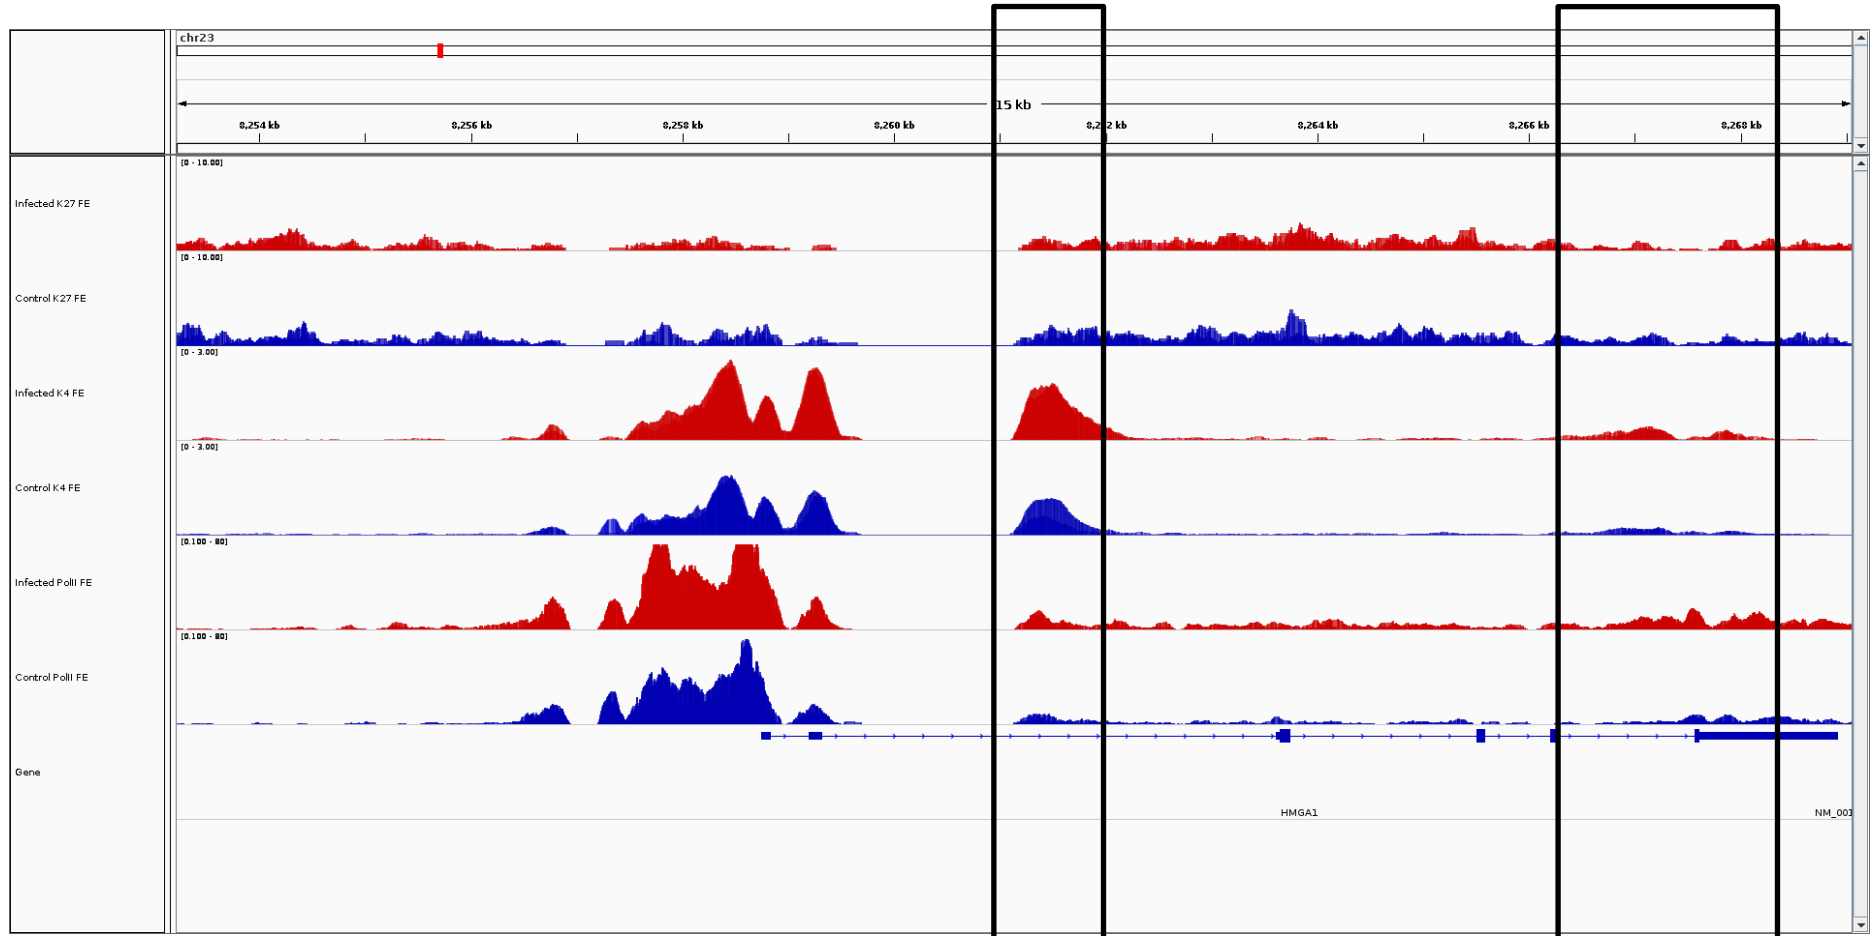

*HMGAI*

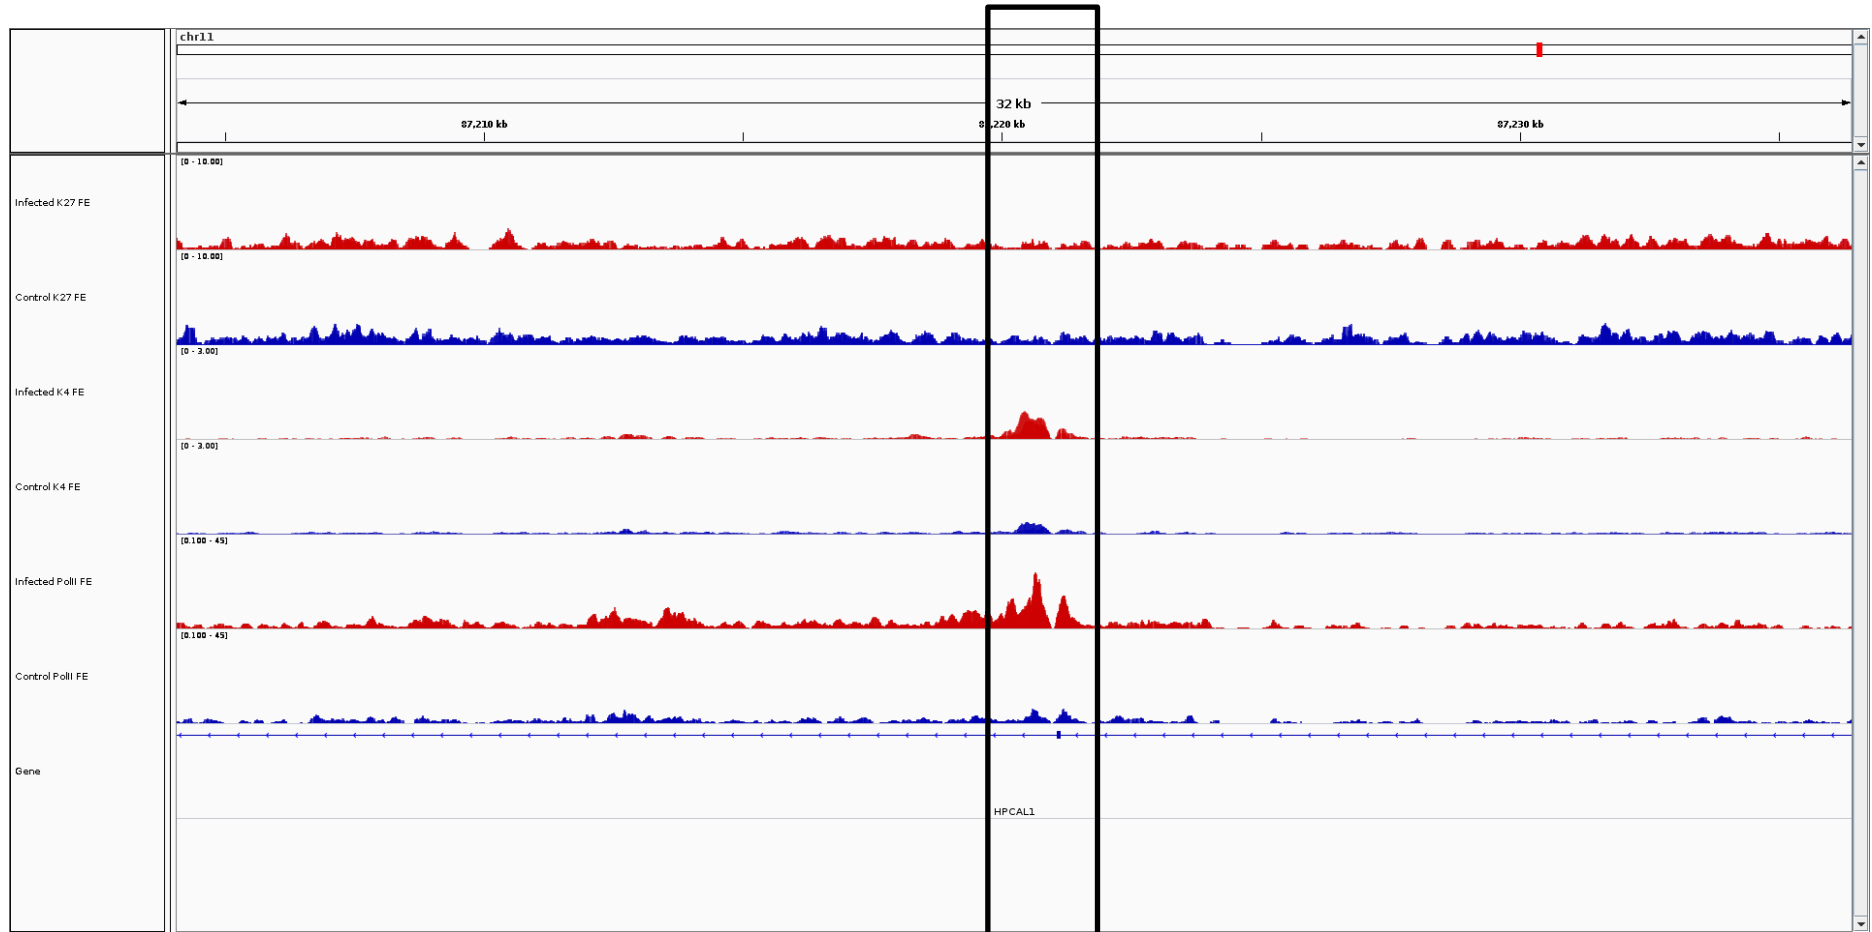

***HPCAL1***

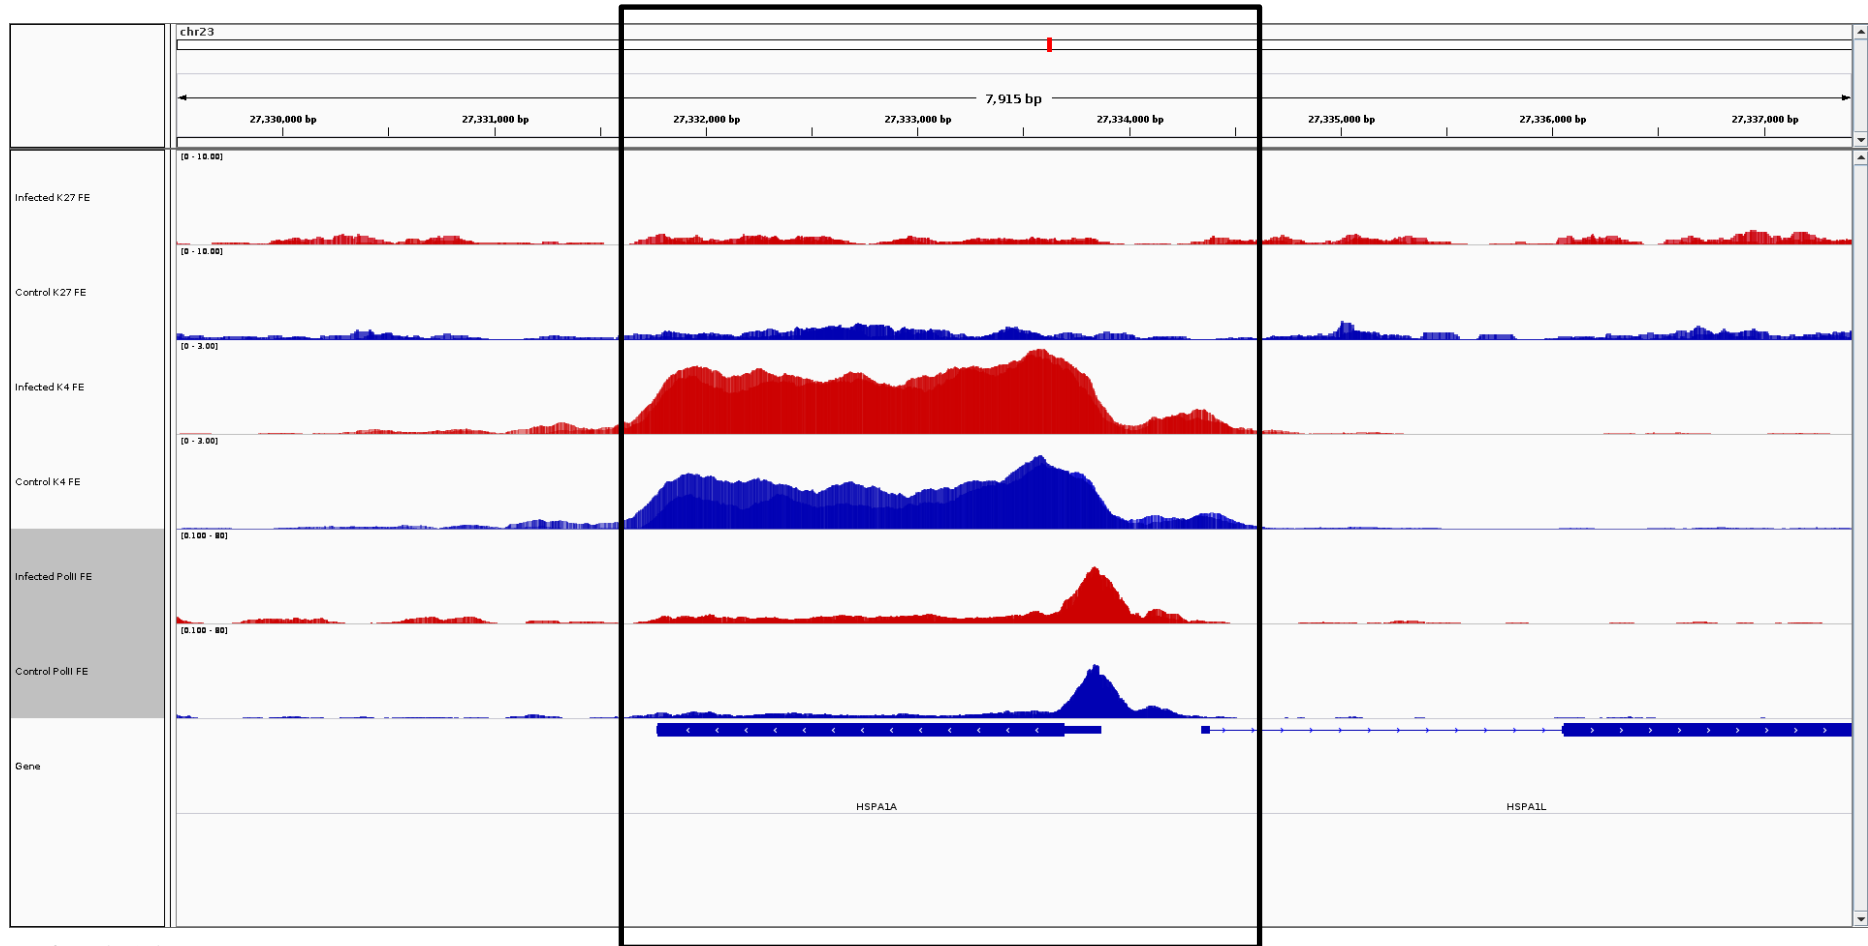

***HSPA1A***

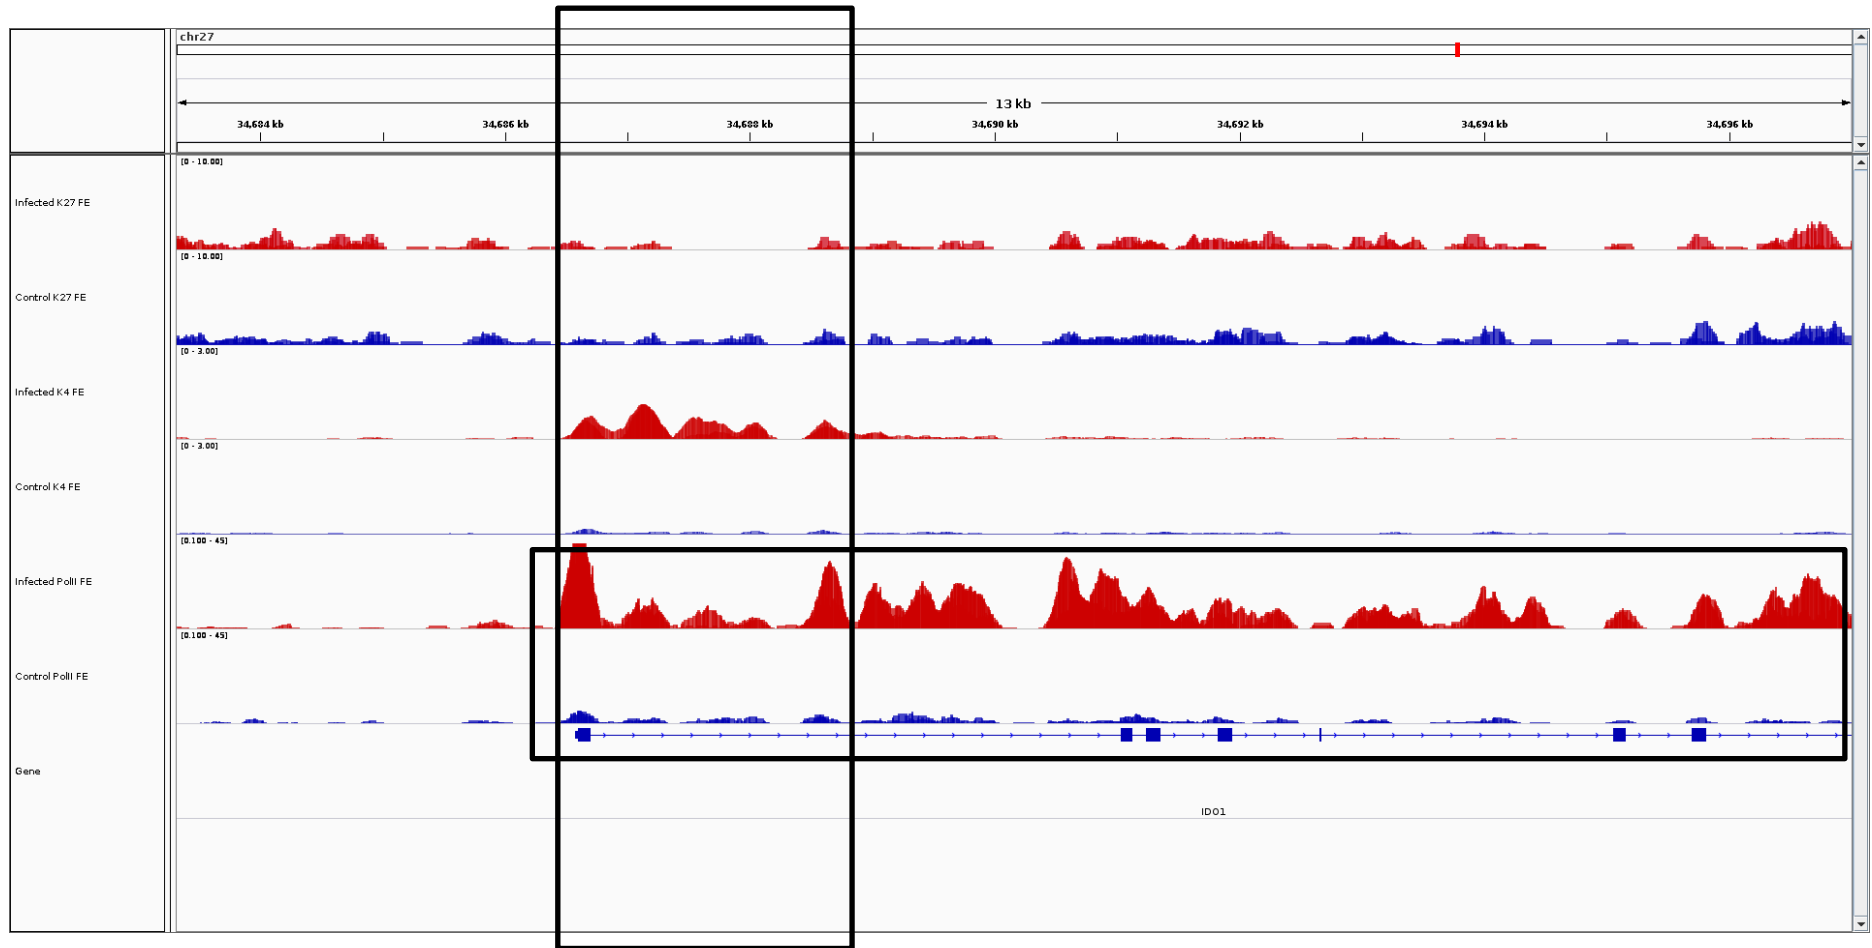

***IDO1***



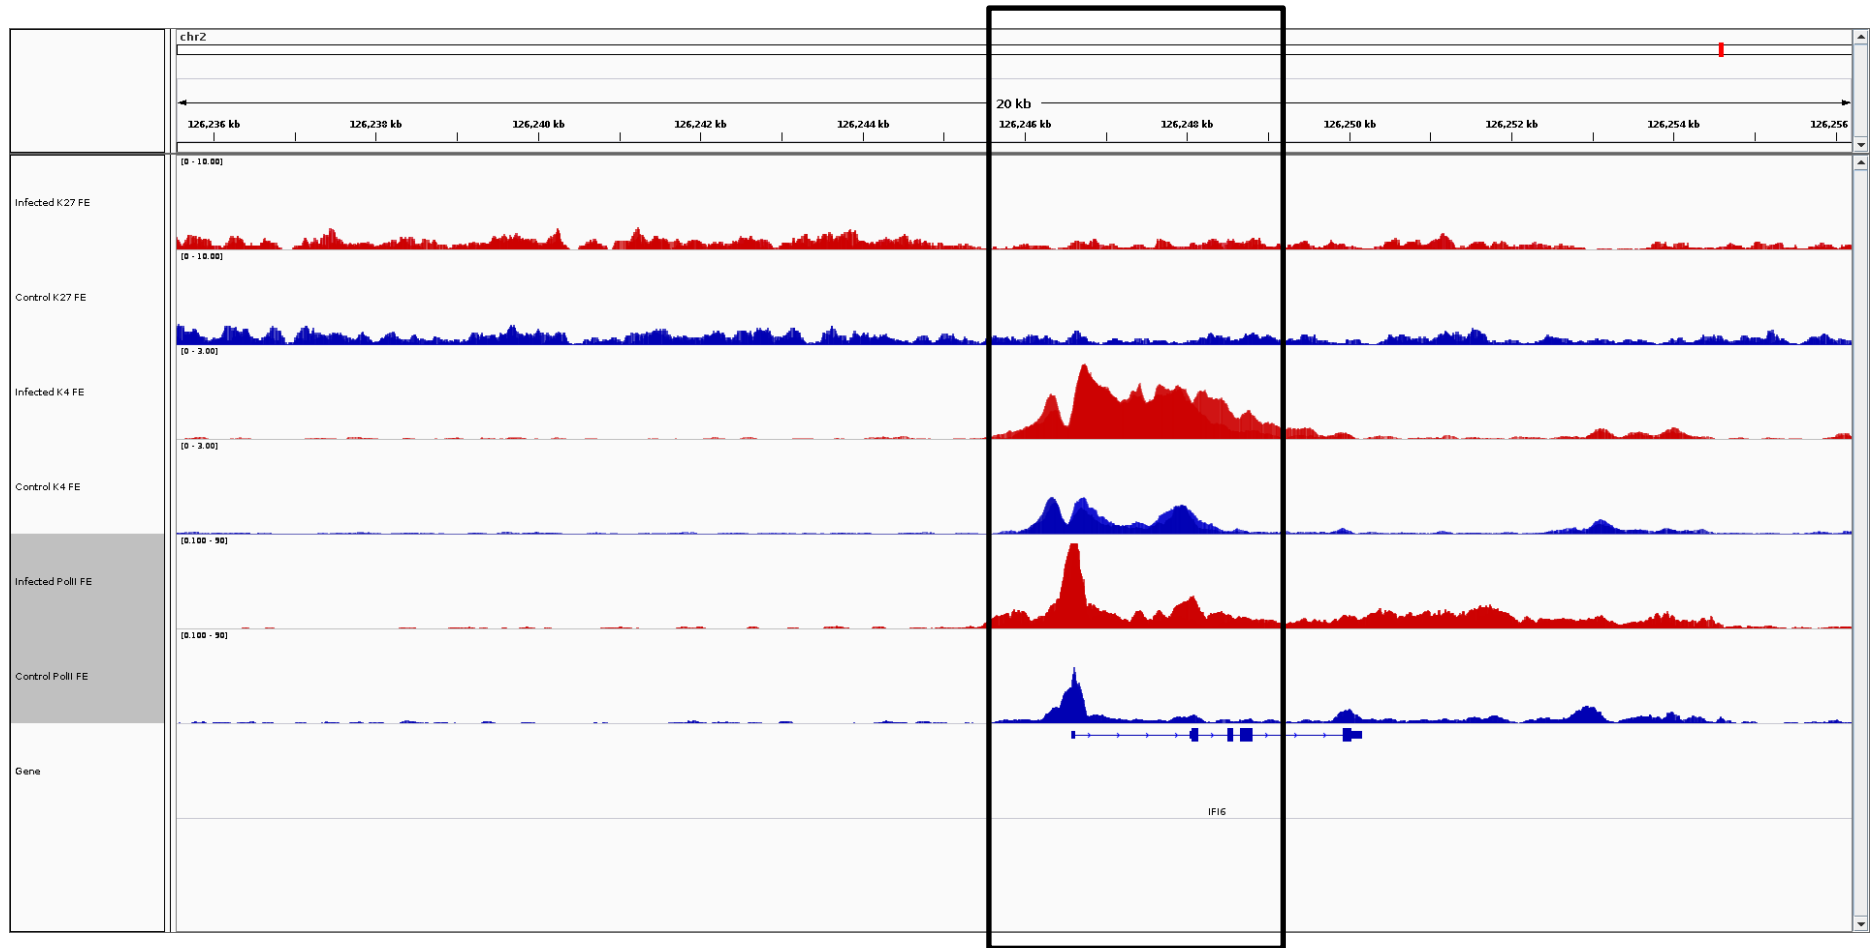

***IFI6***

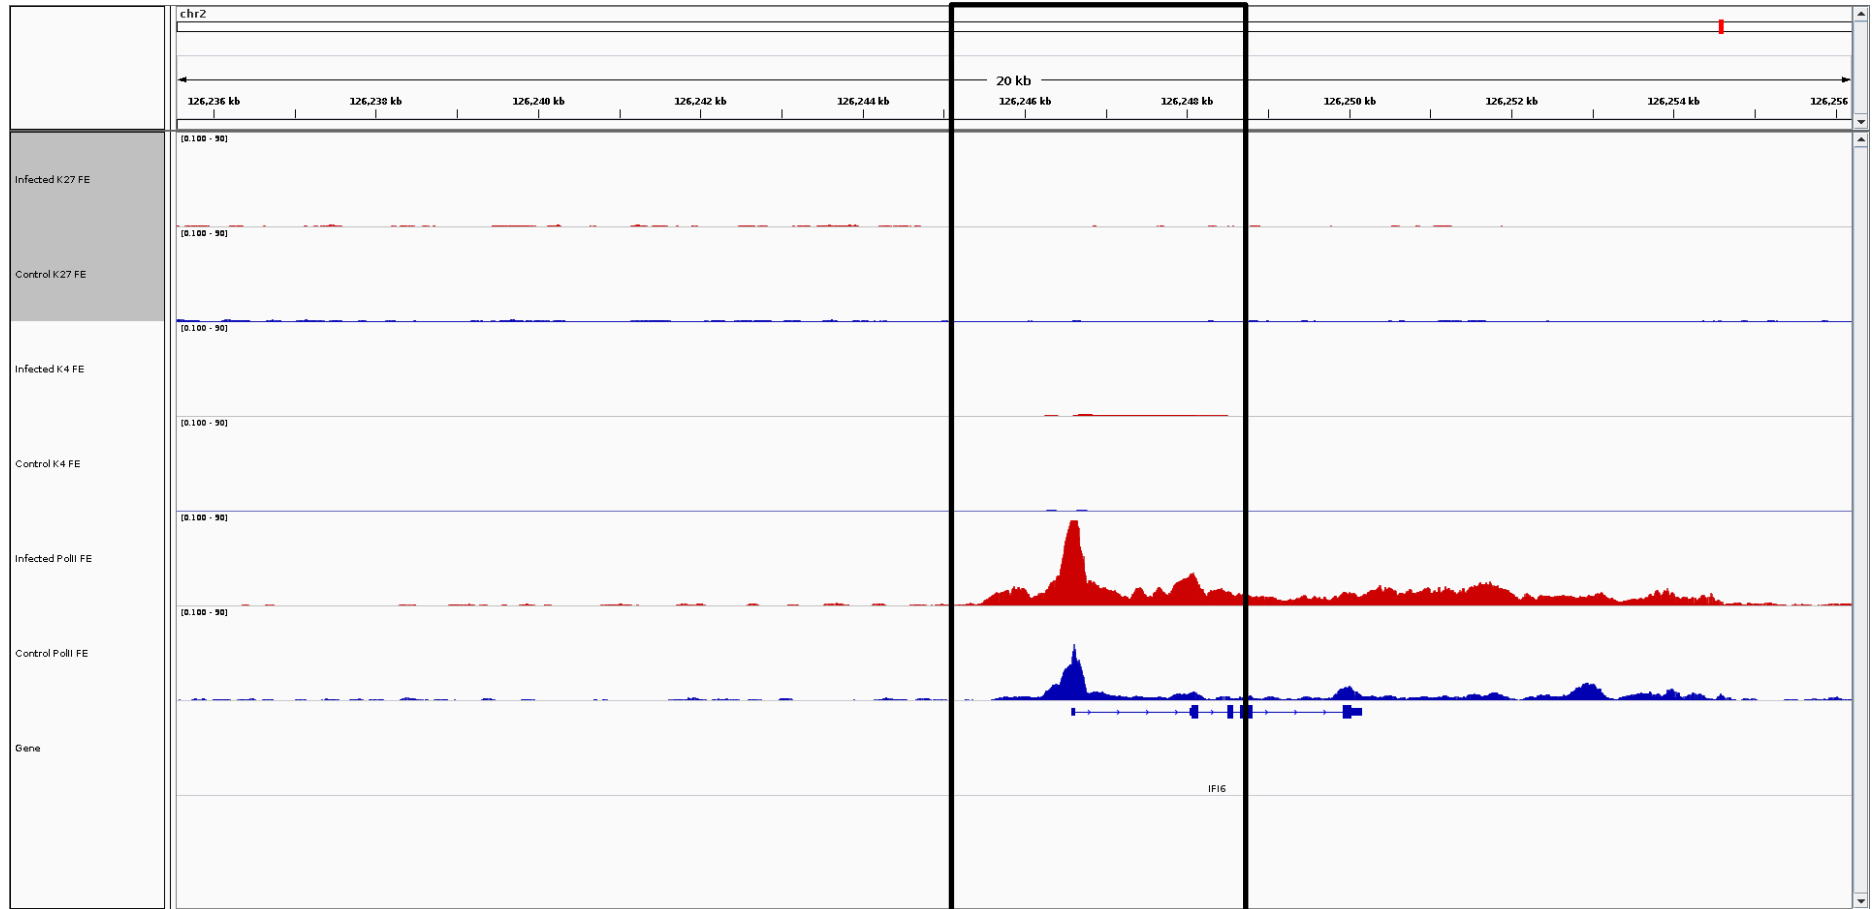

***IFI6***

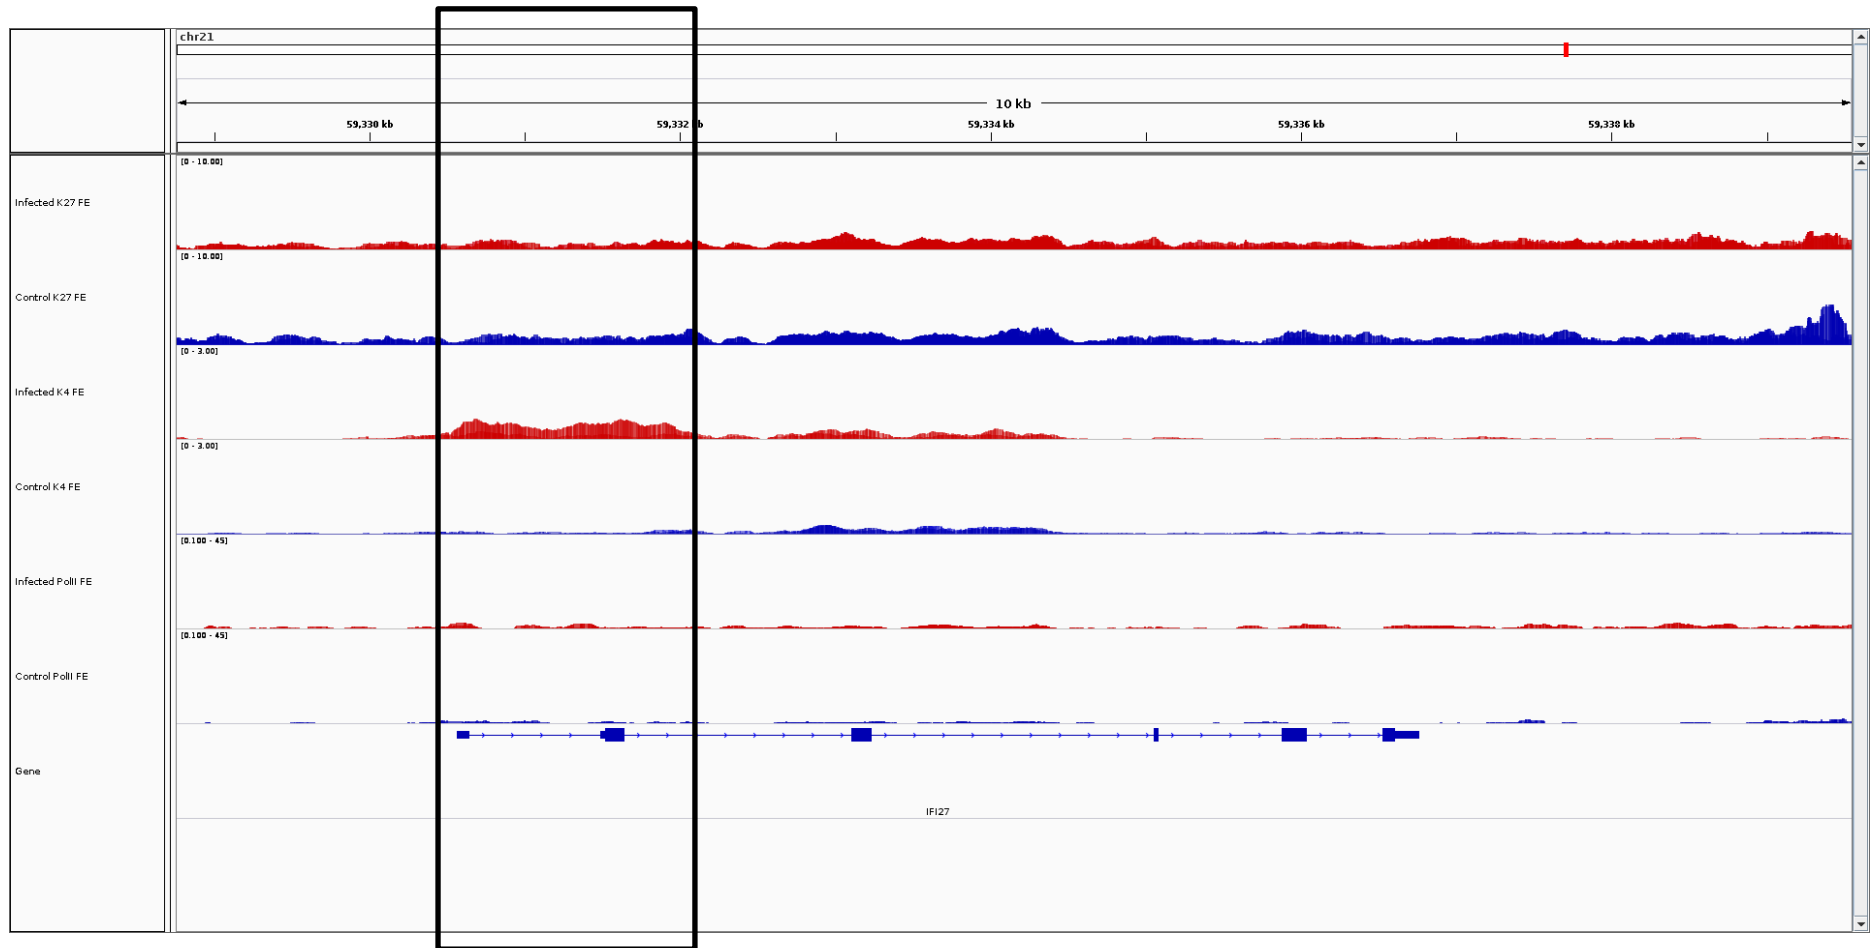

***IFI27***

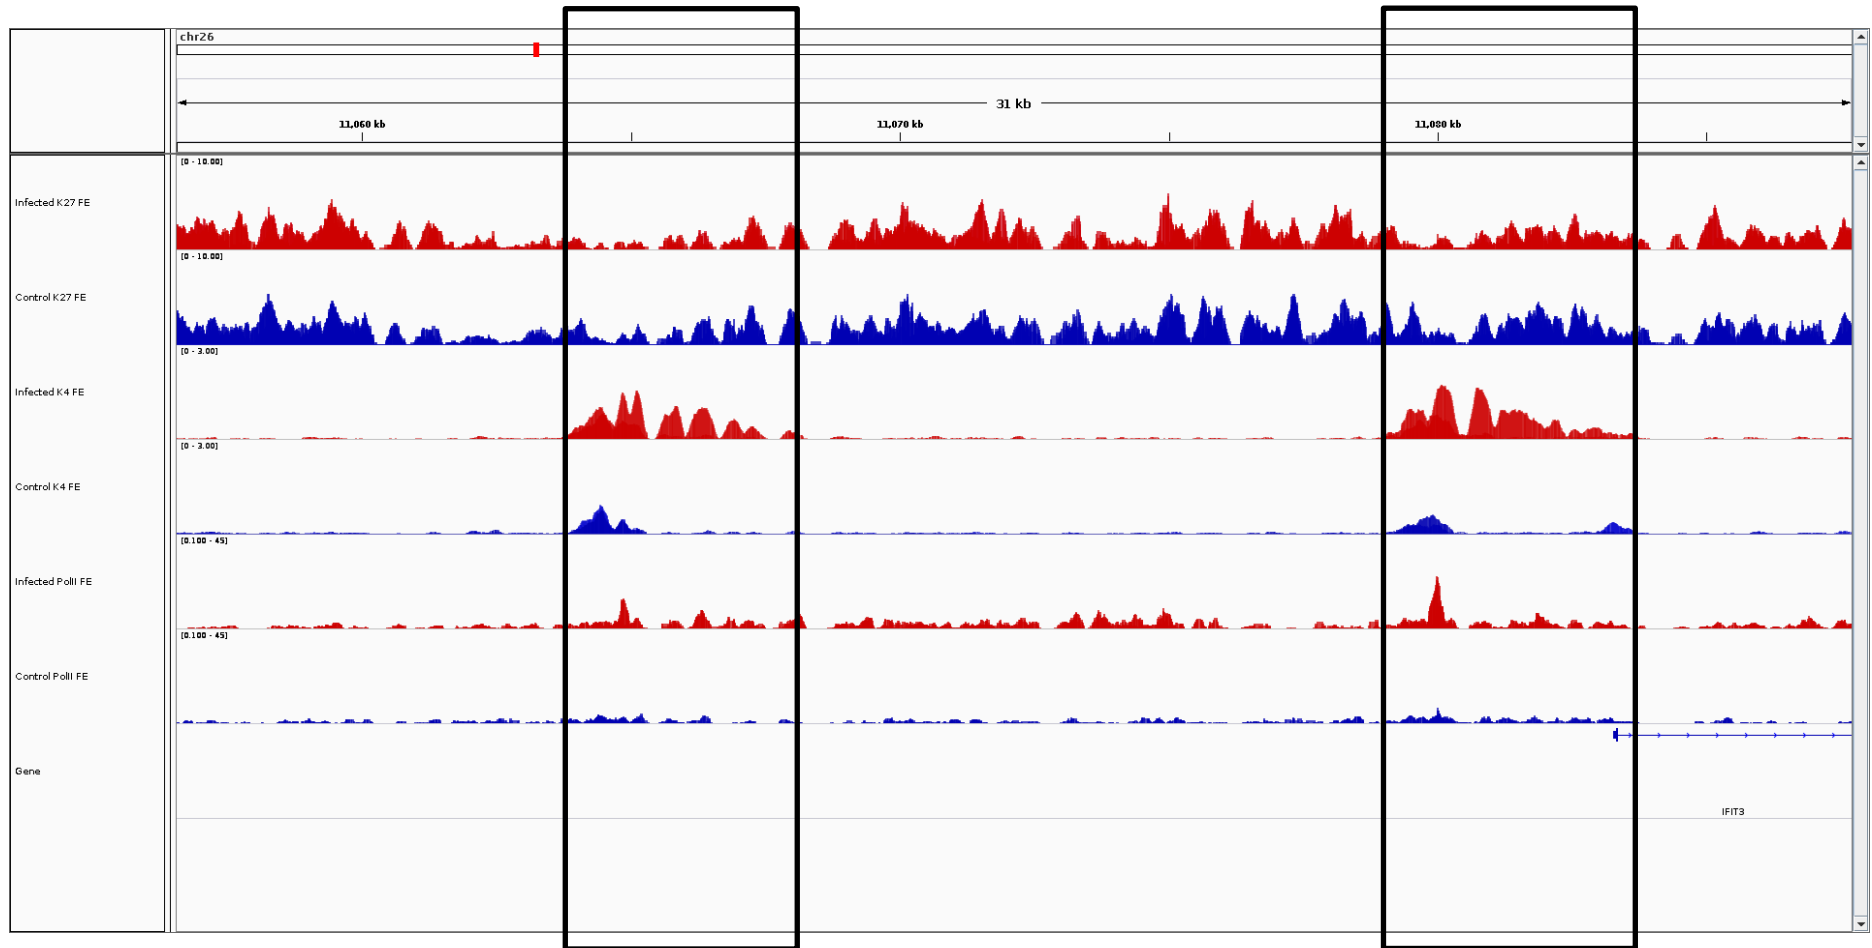

***IFIT3***

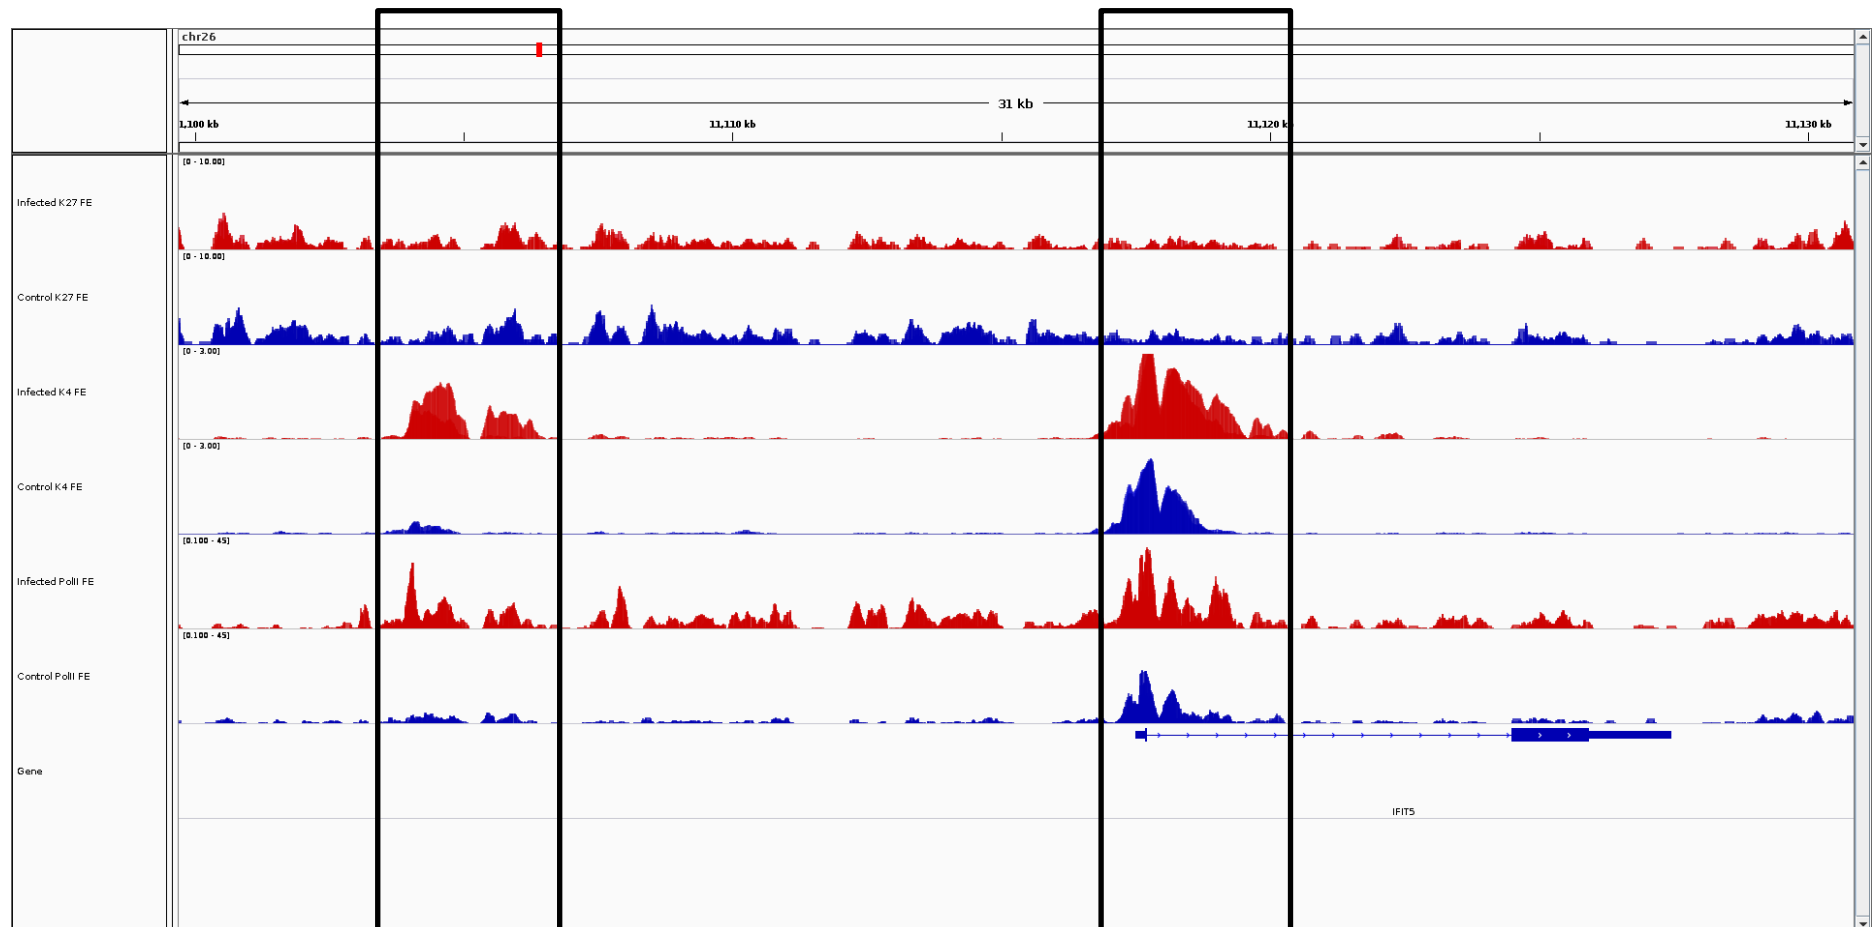

***IFIT5***

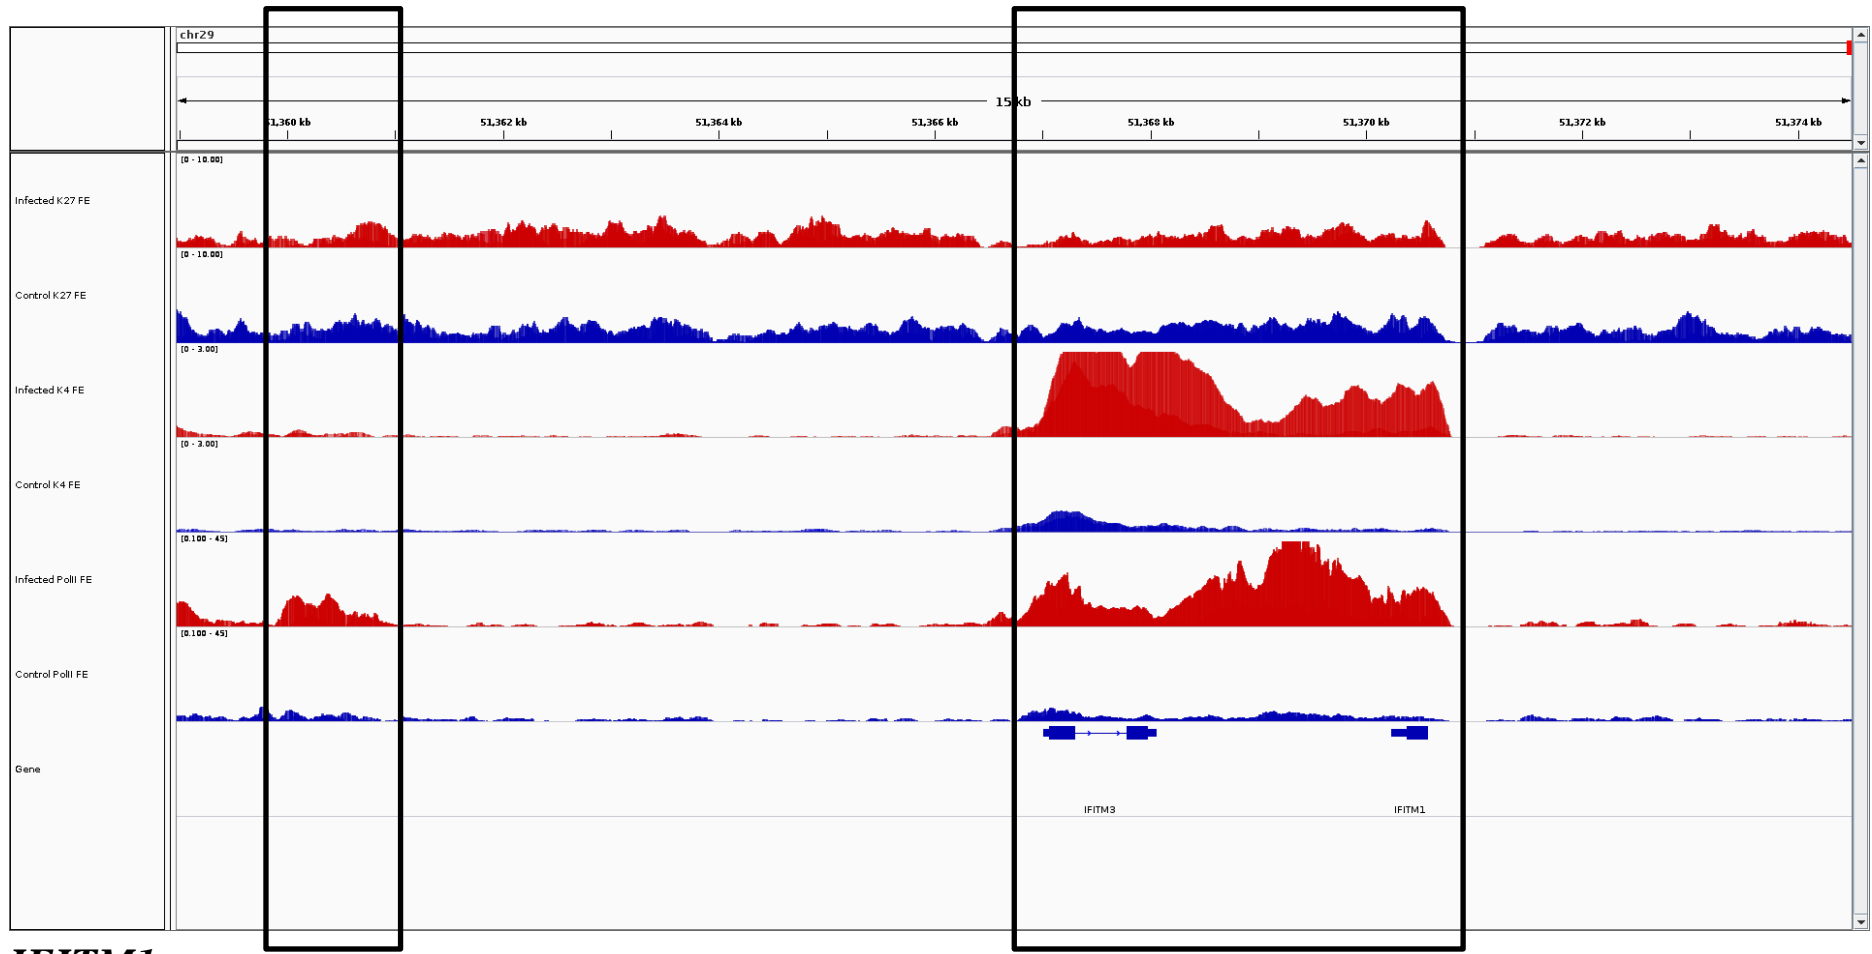

***IFITM1***

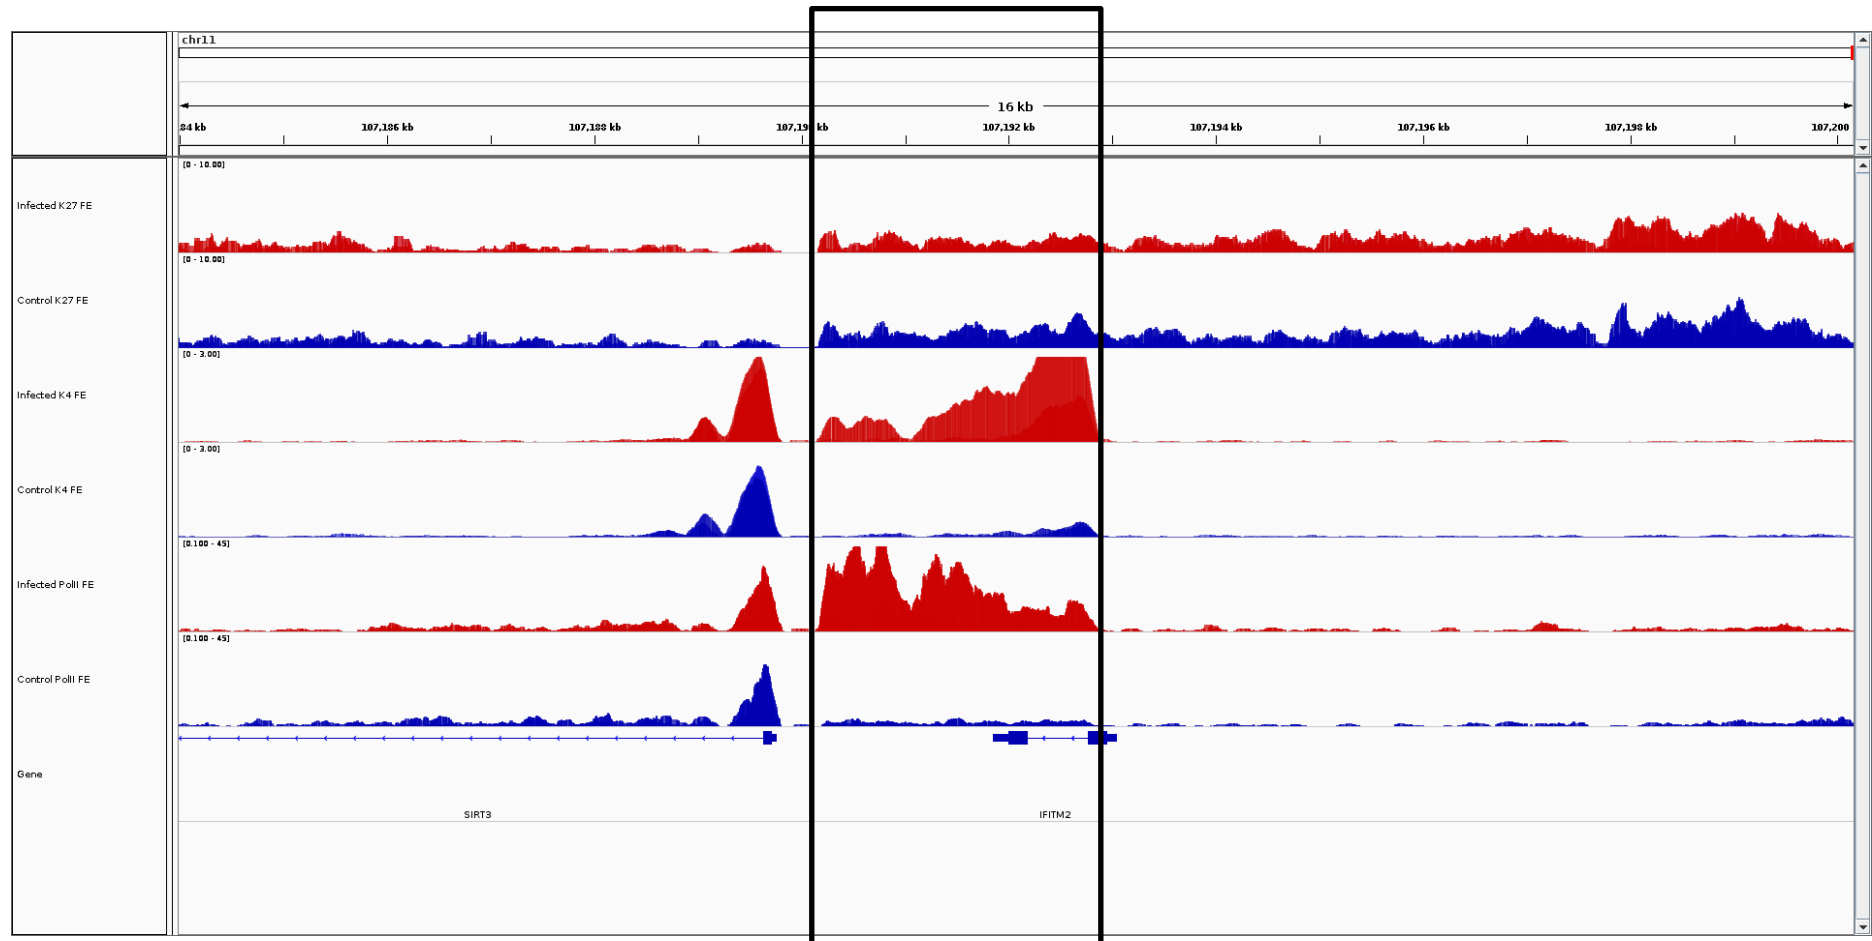

***IFITM2***

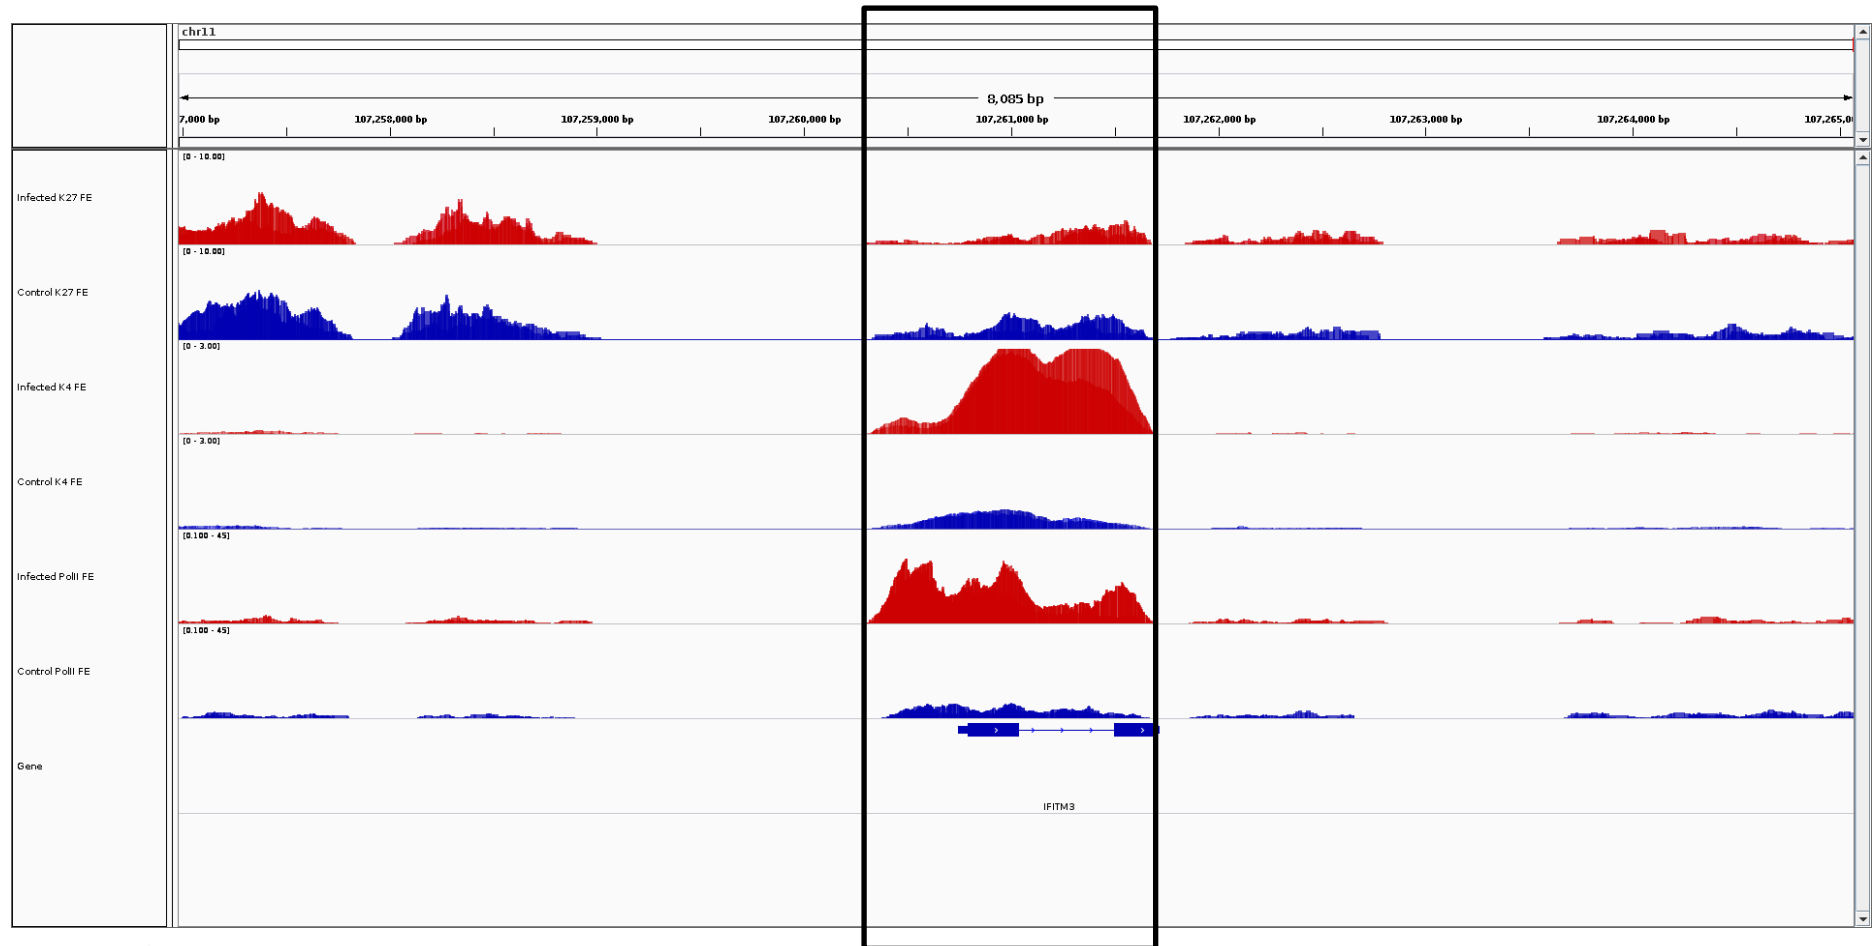

***IFITM3***



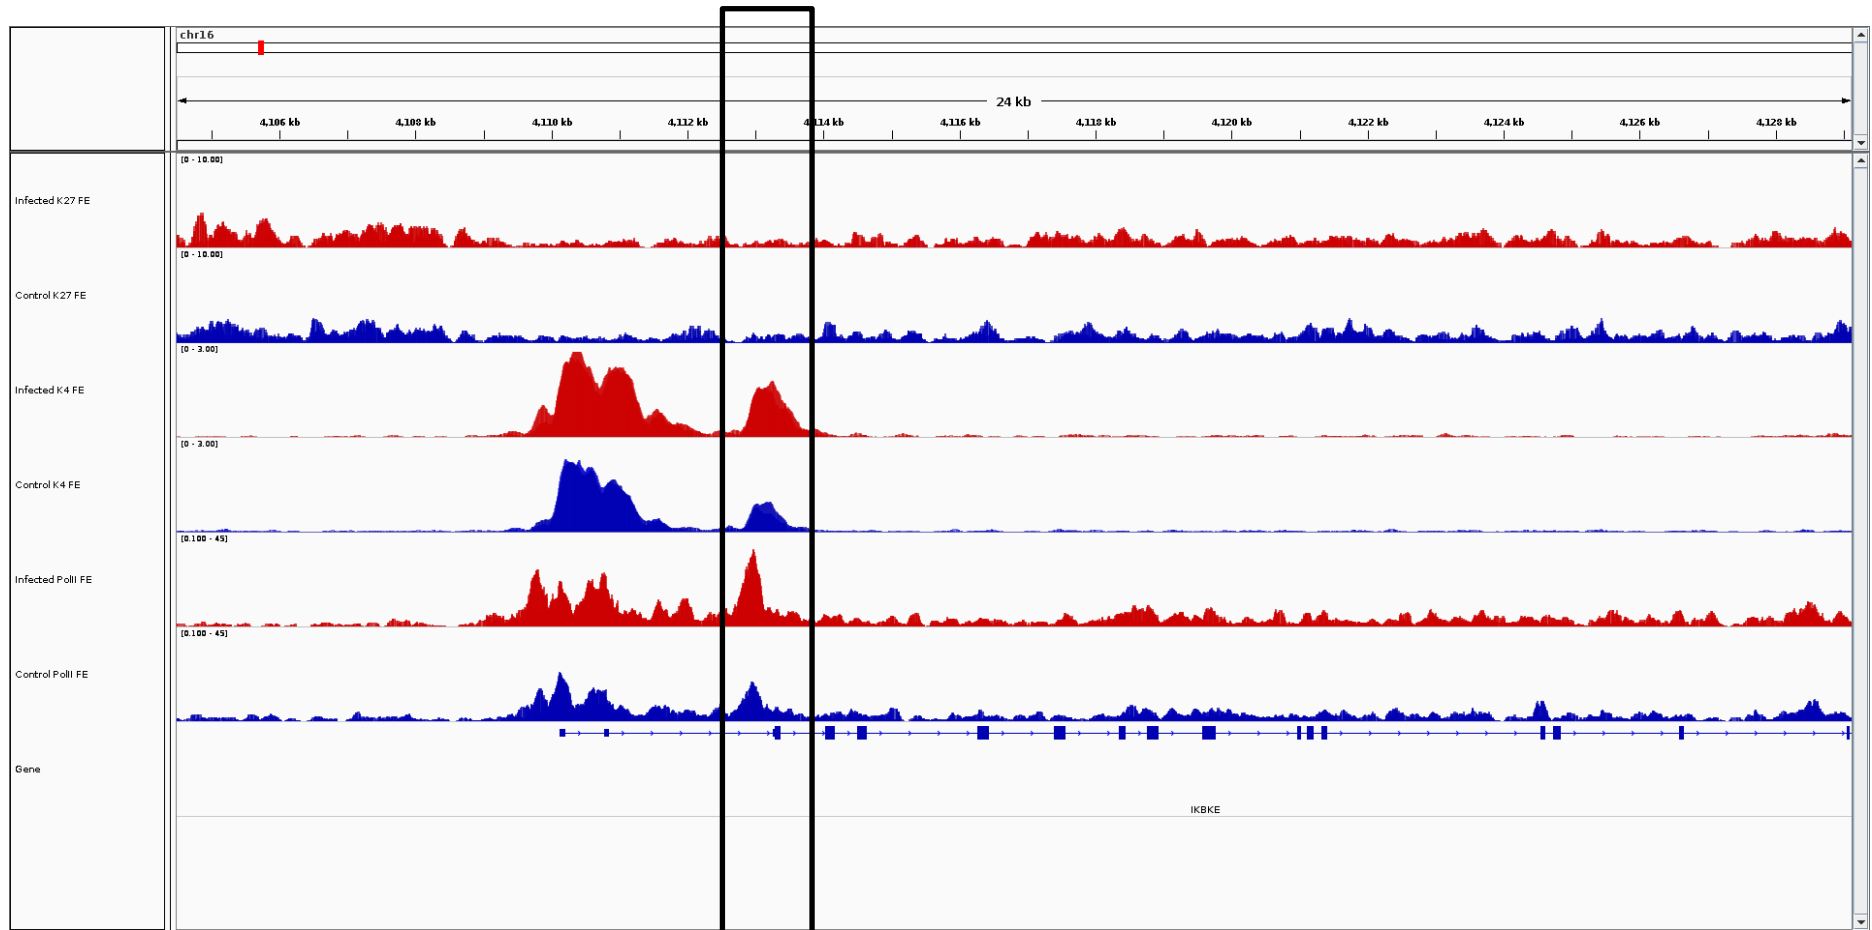

***IKBKE***

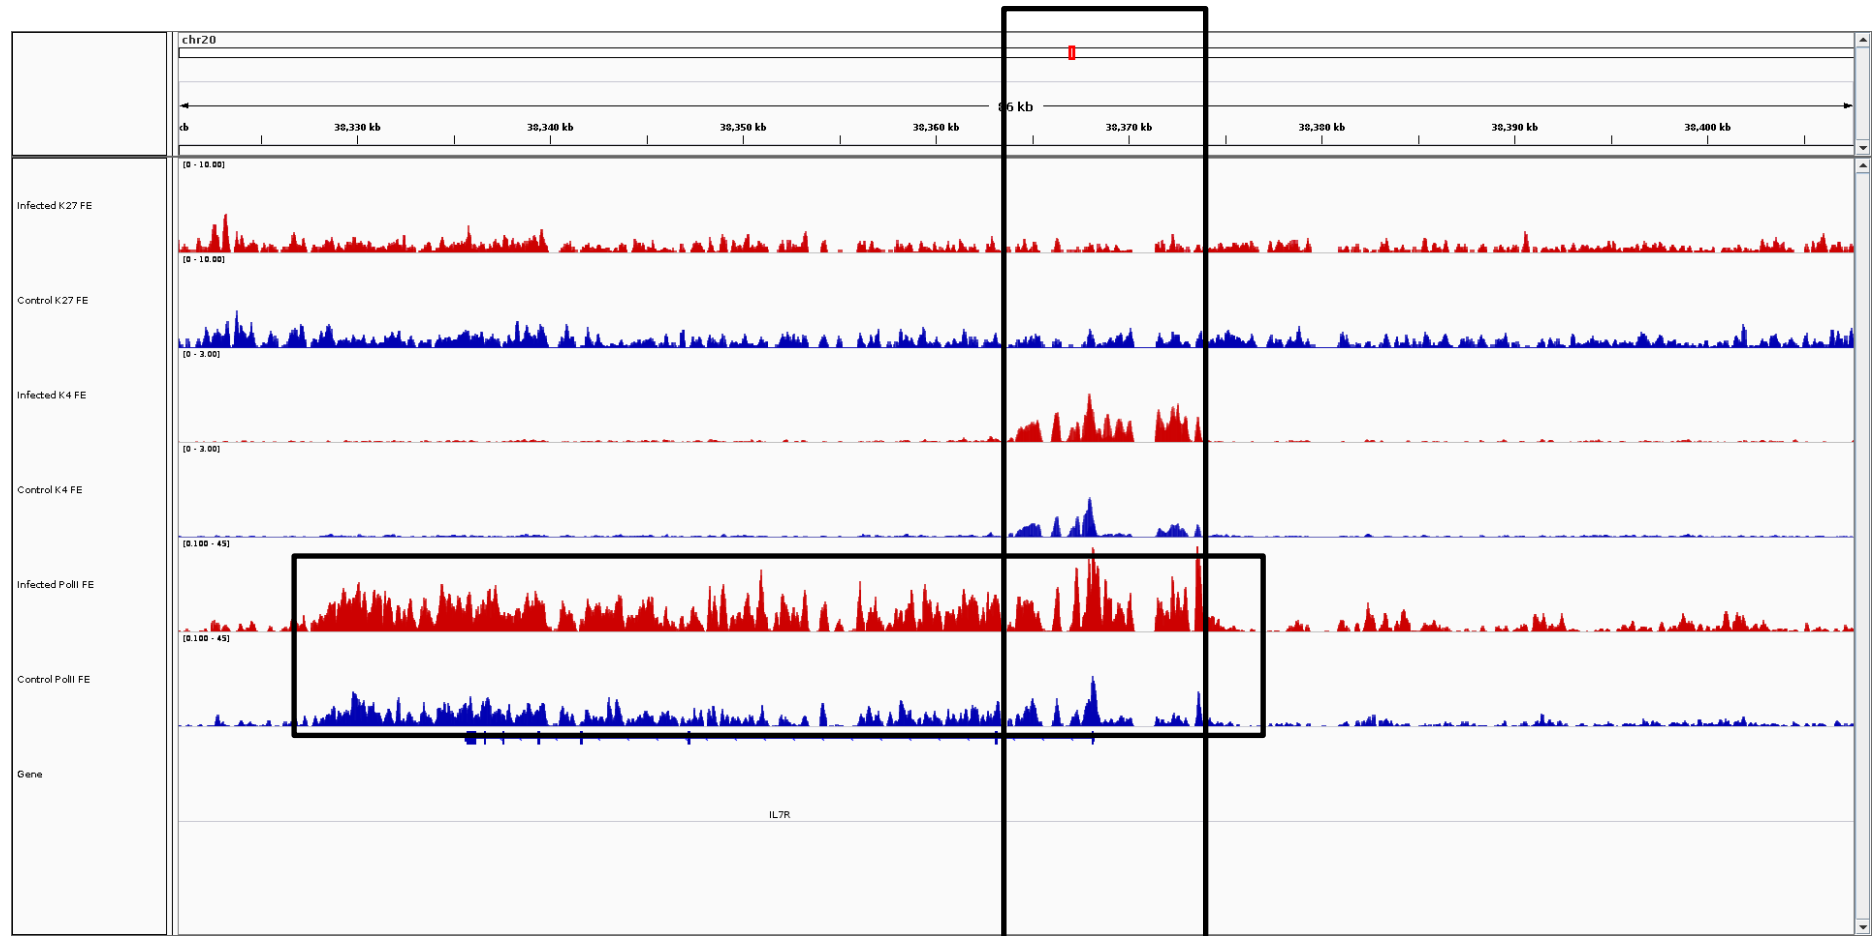

*IL7R*

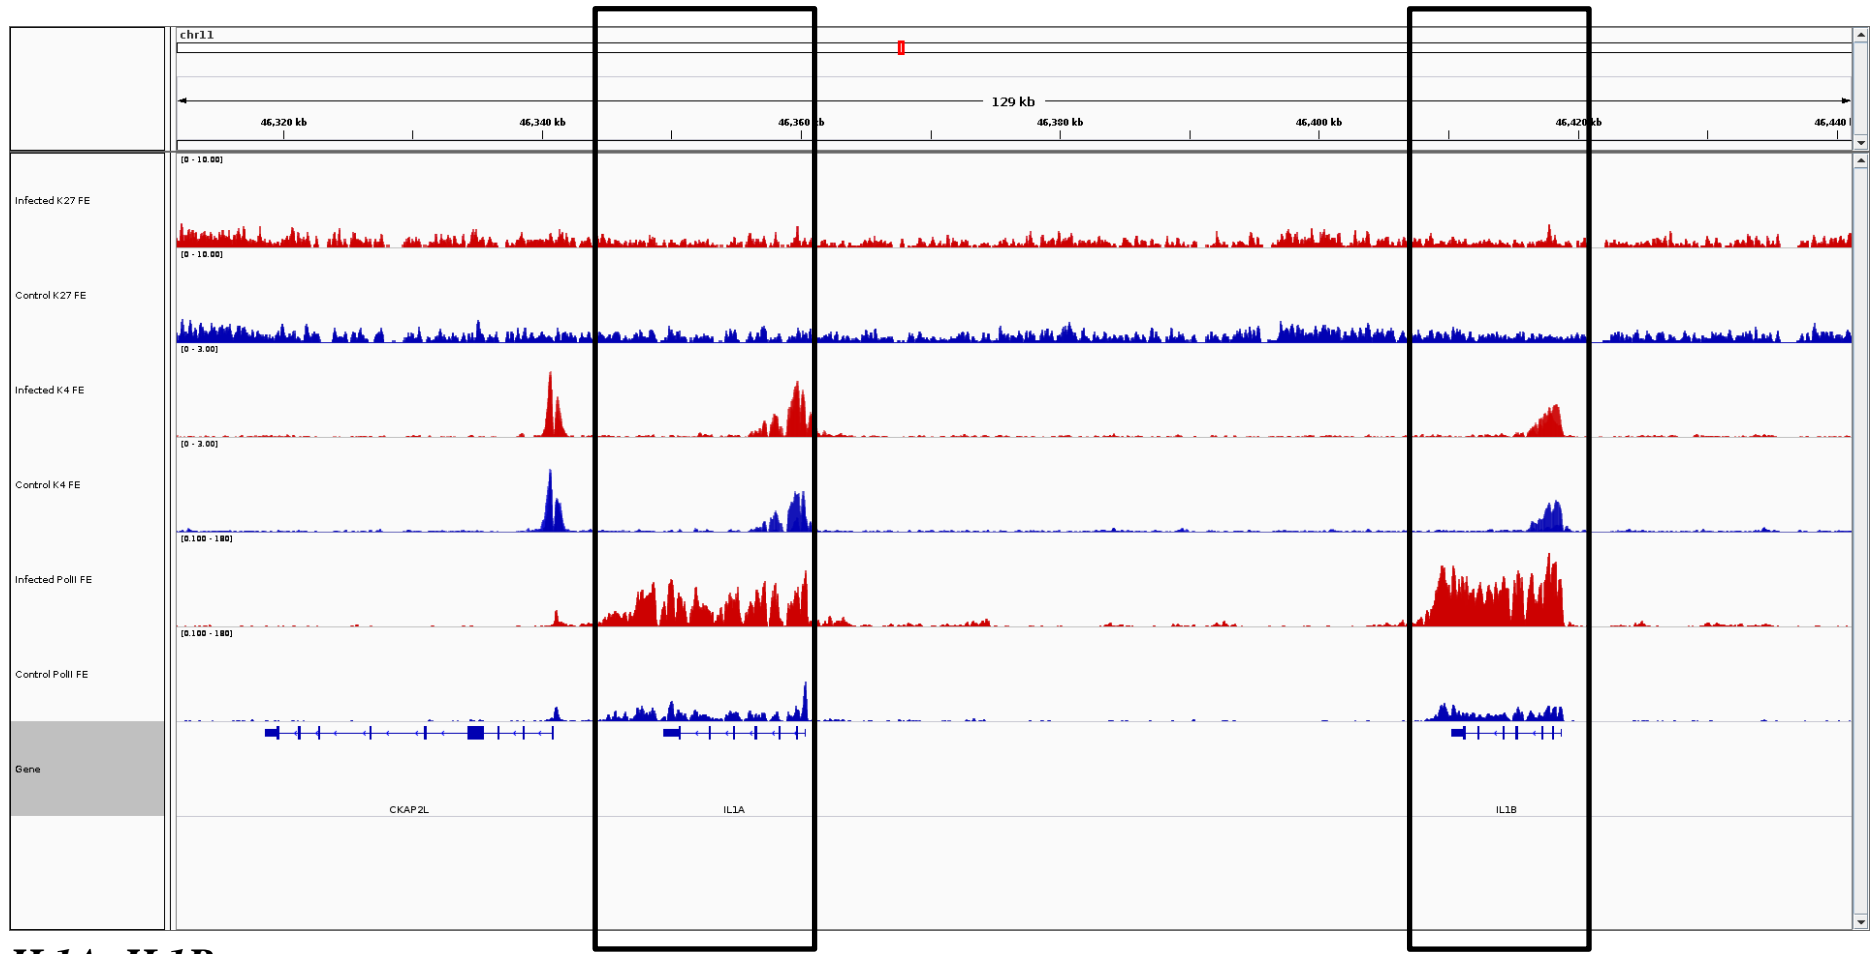

***IL1A, IL1B***

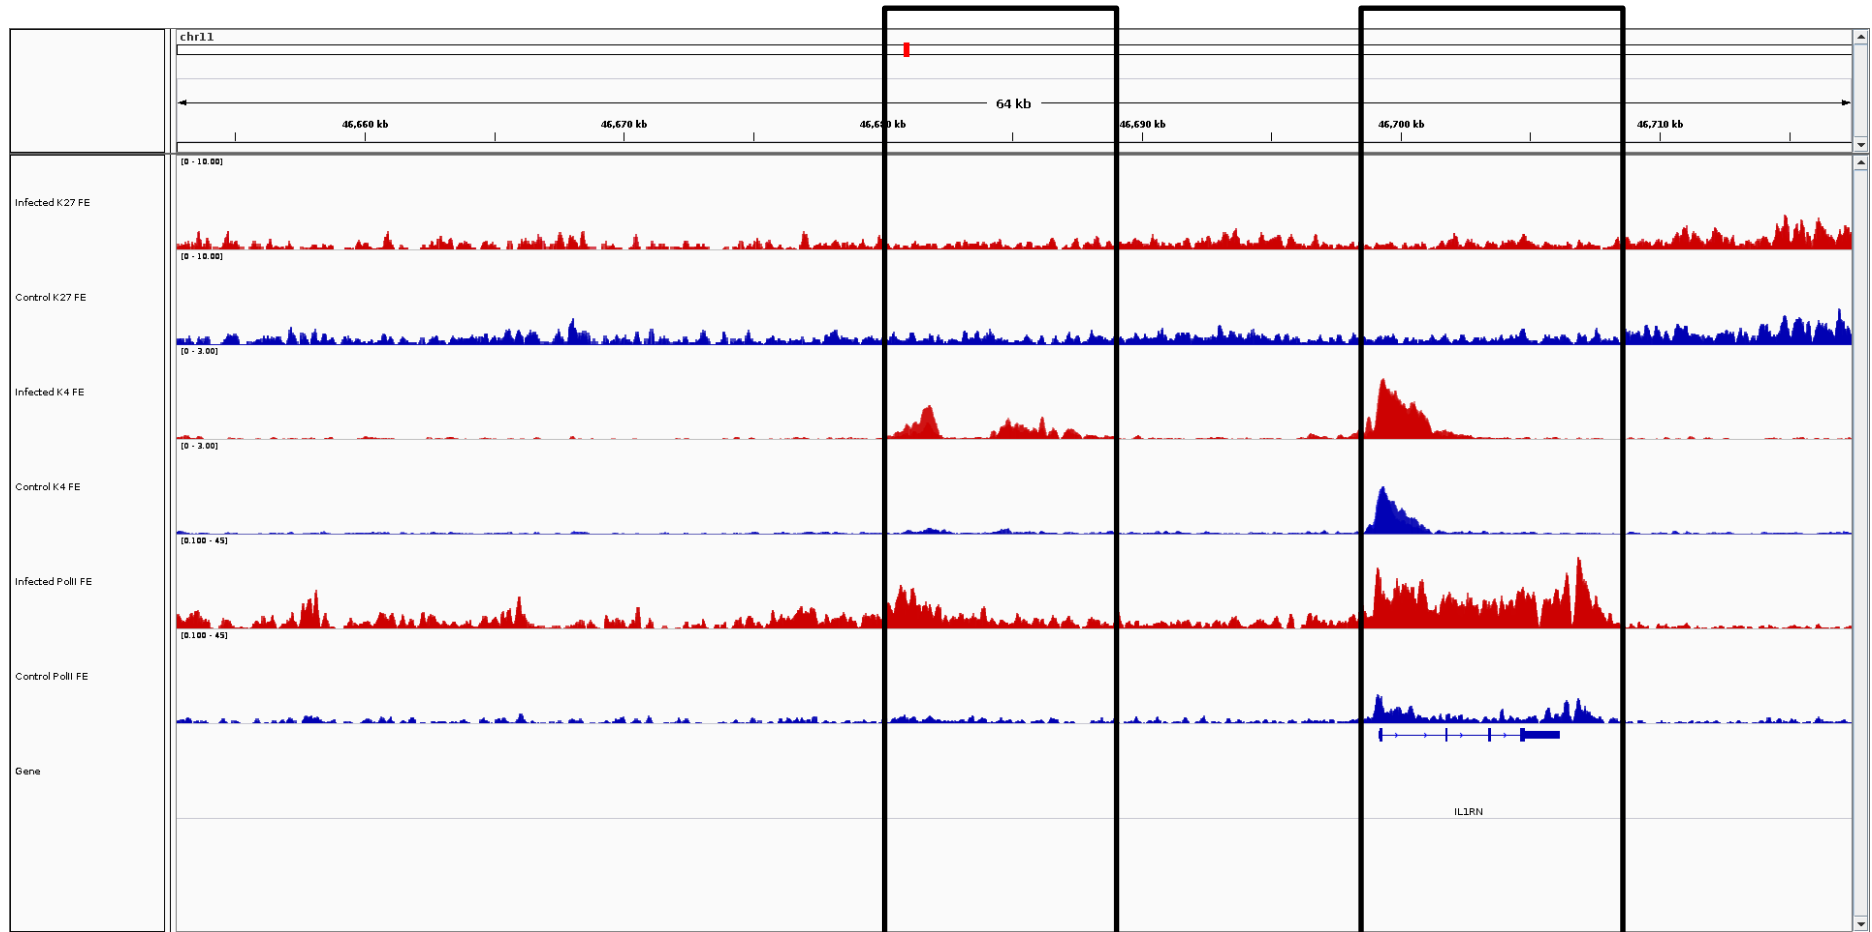

*IL1RN*

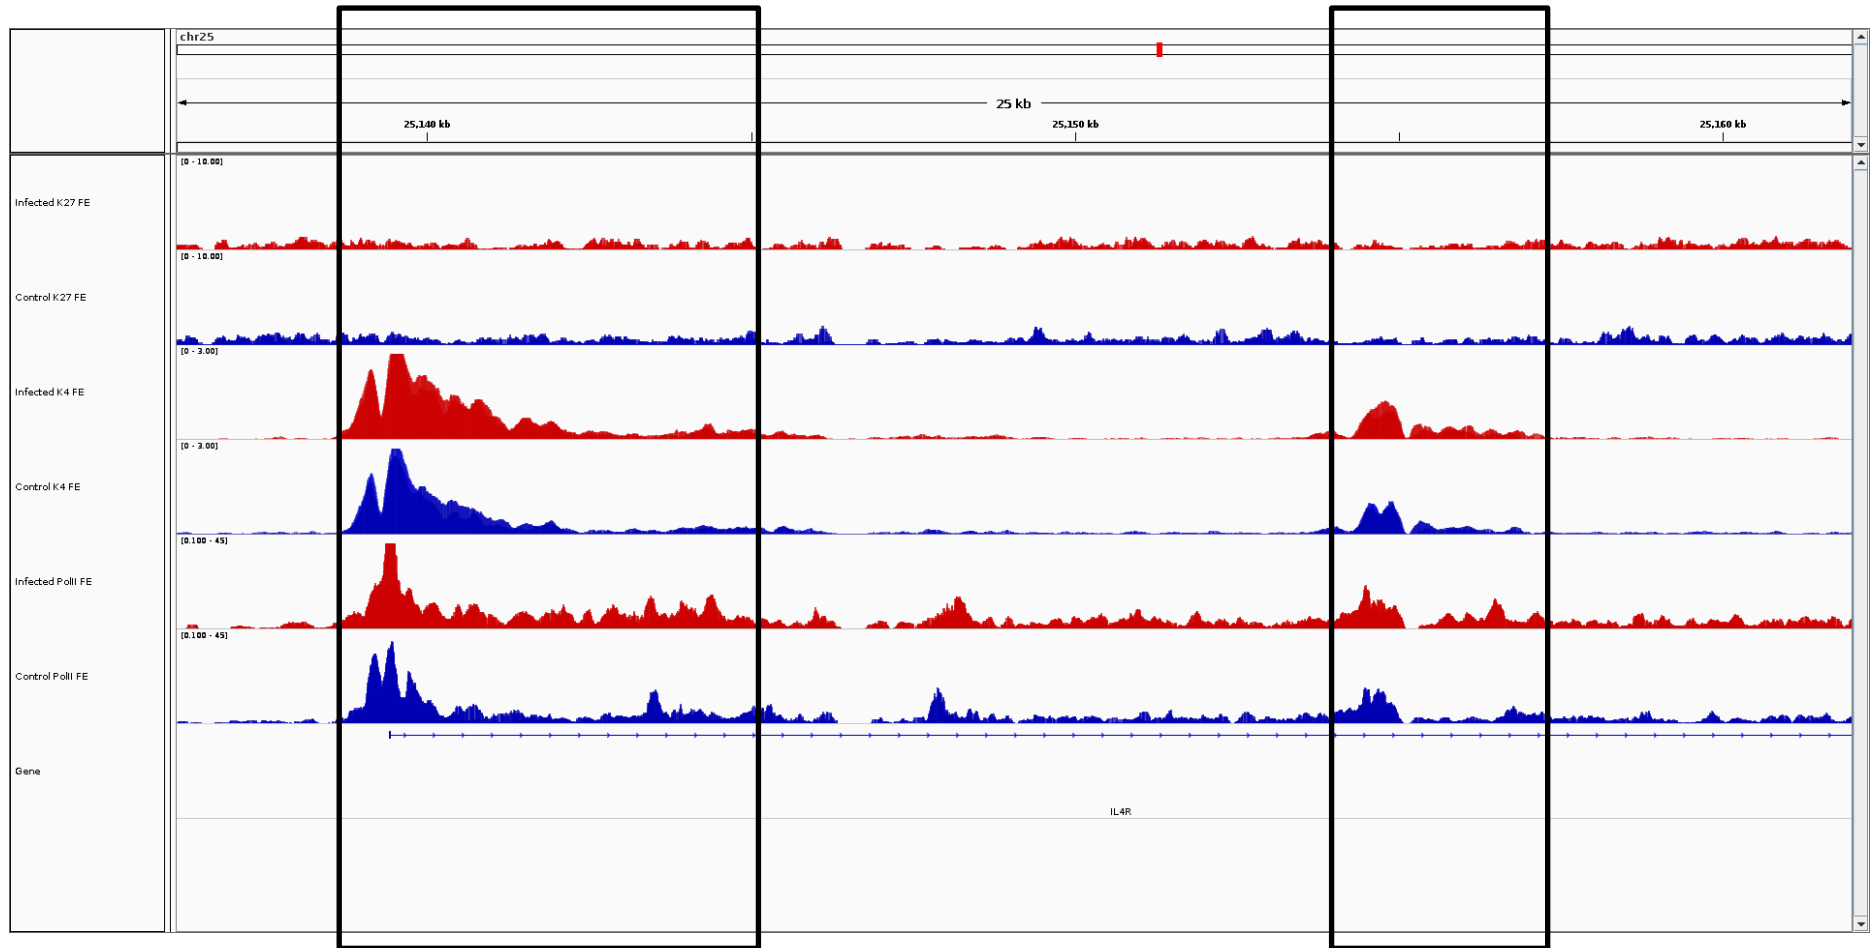

***ILAR***

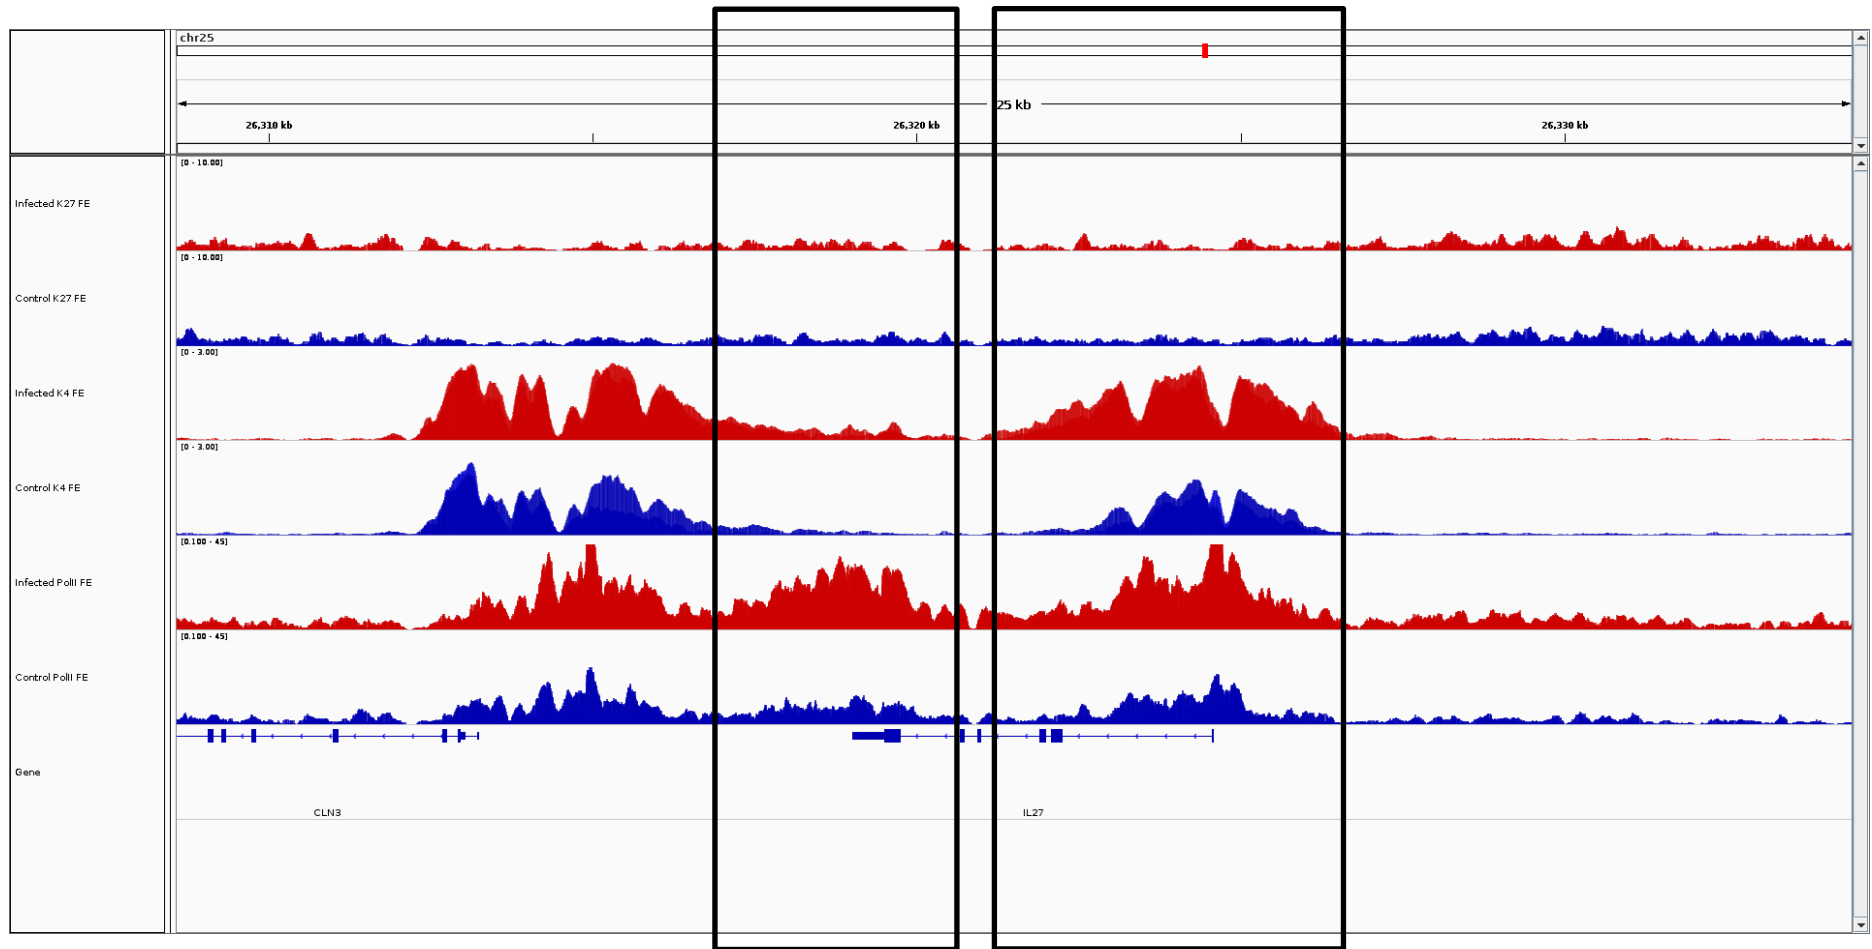

*IL27*

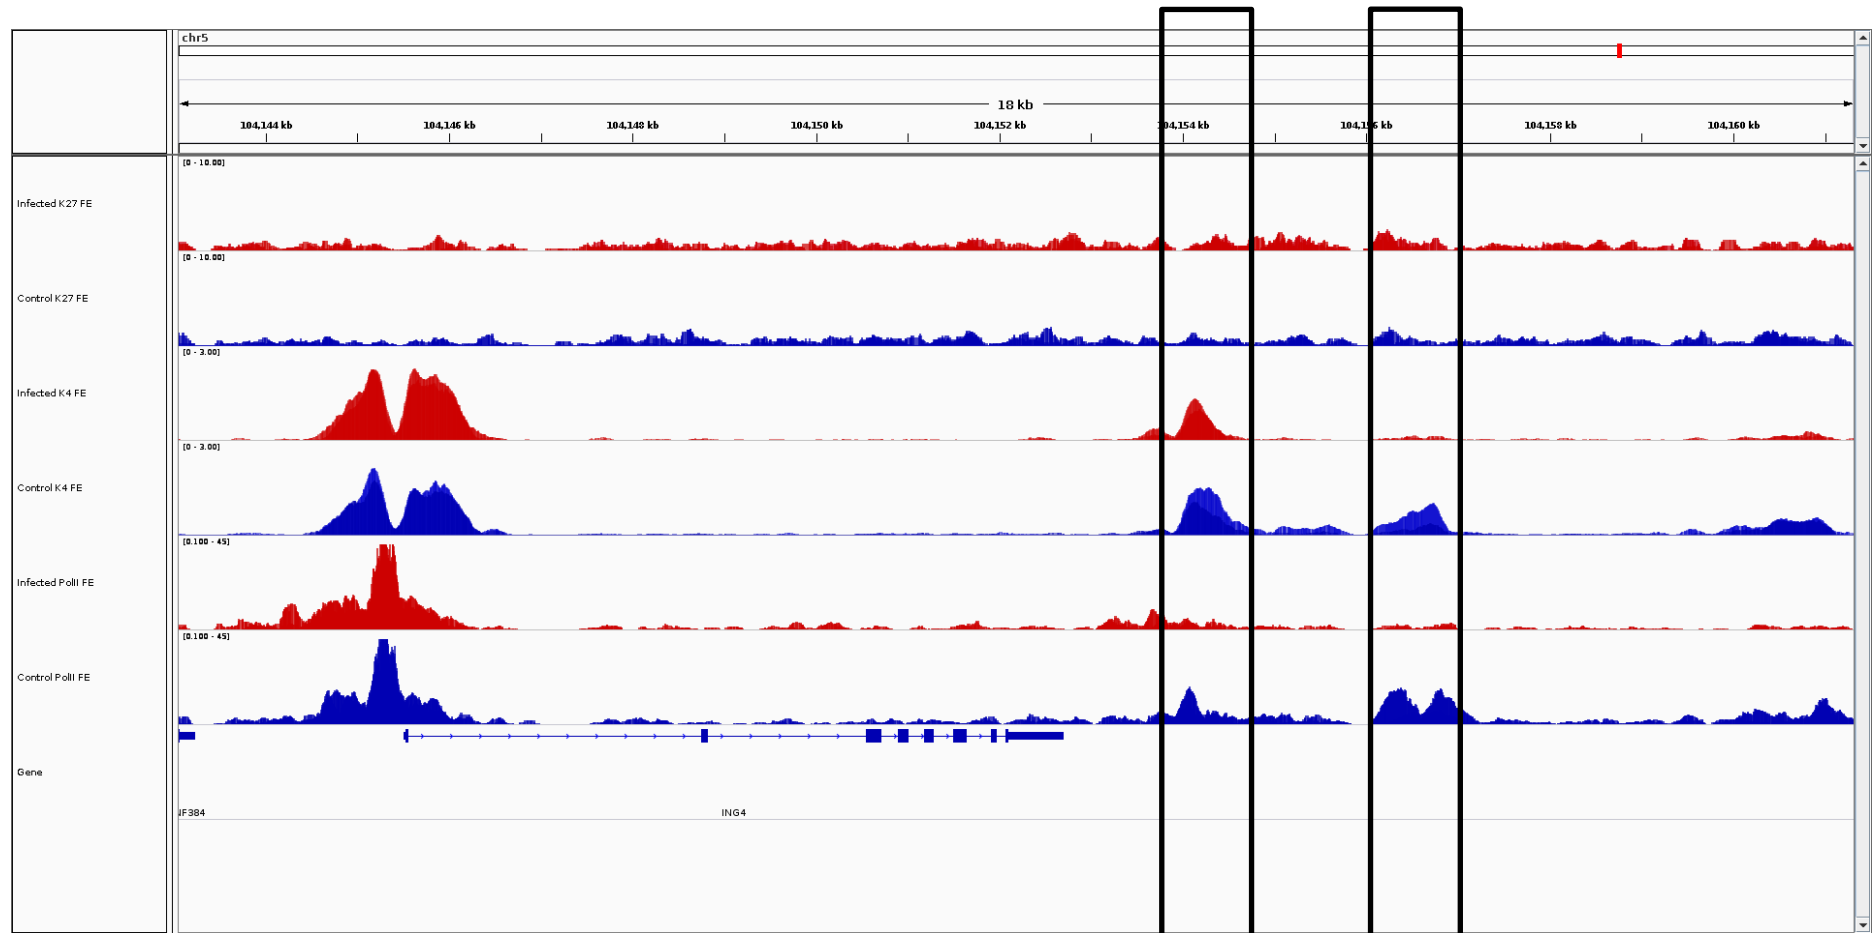

***ING4***

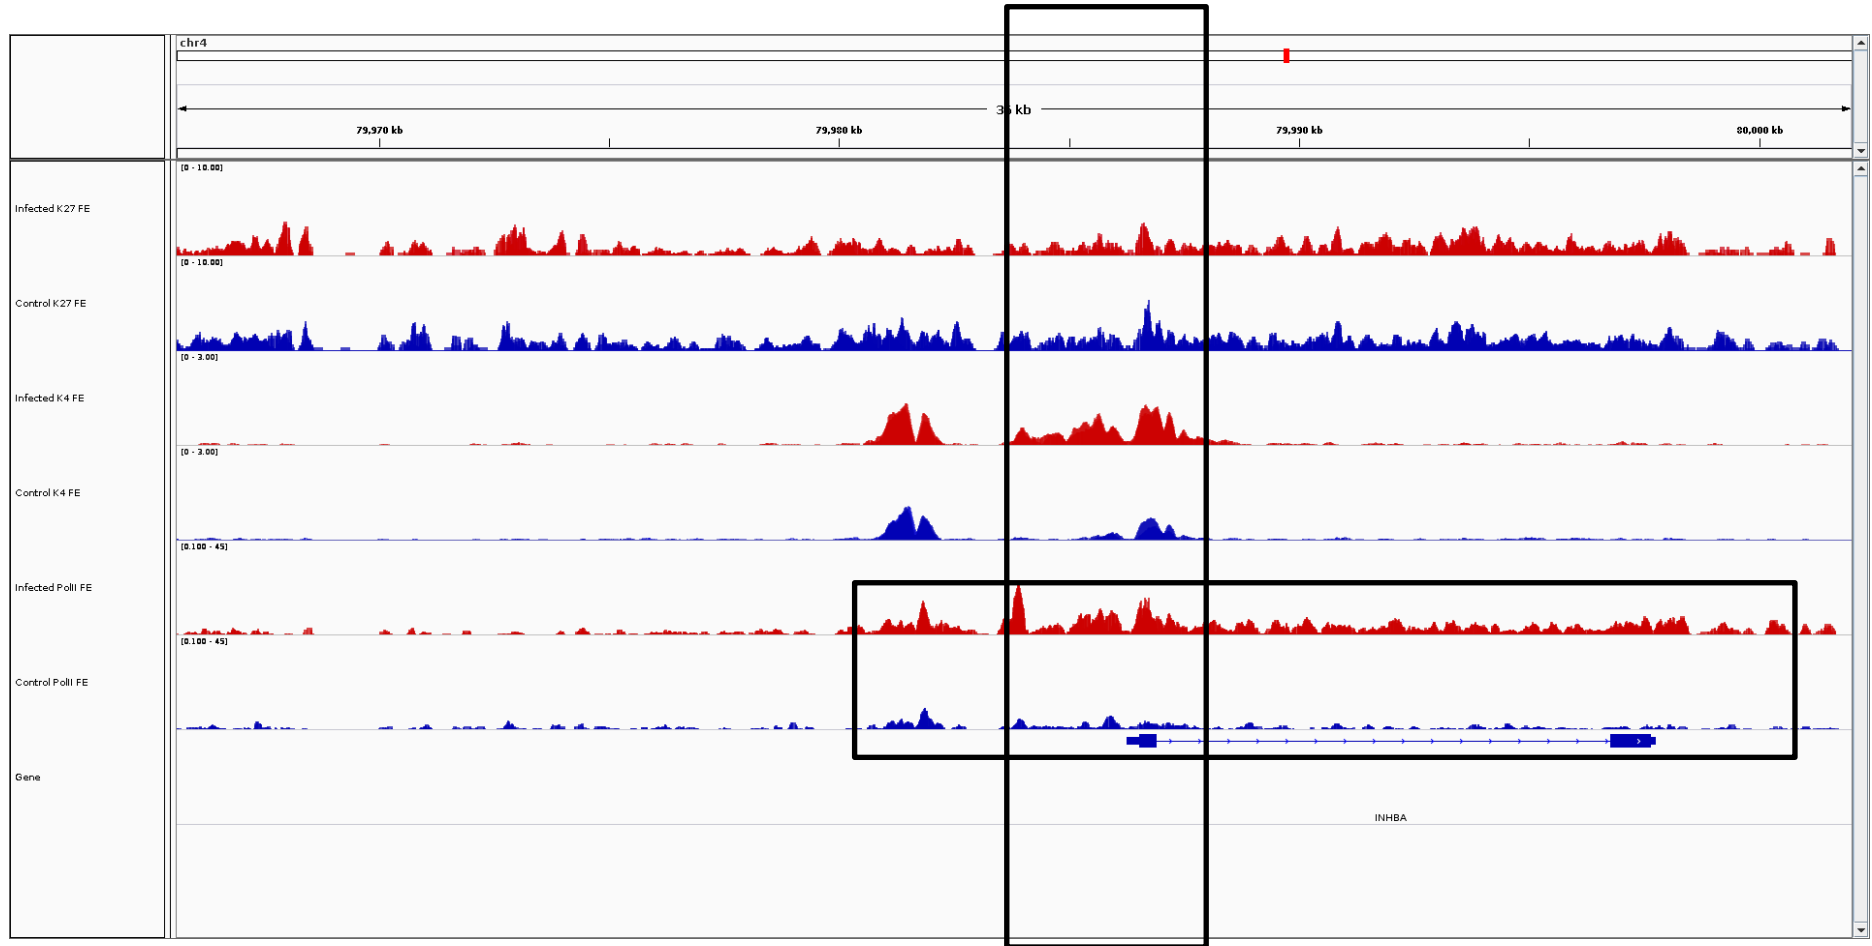

***INHBA***



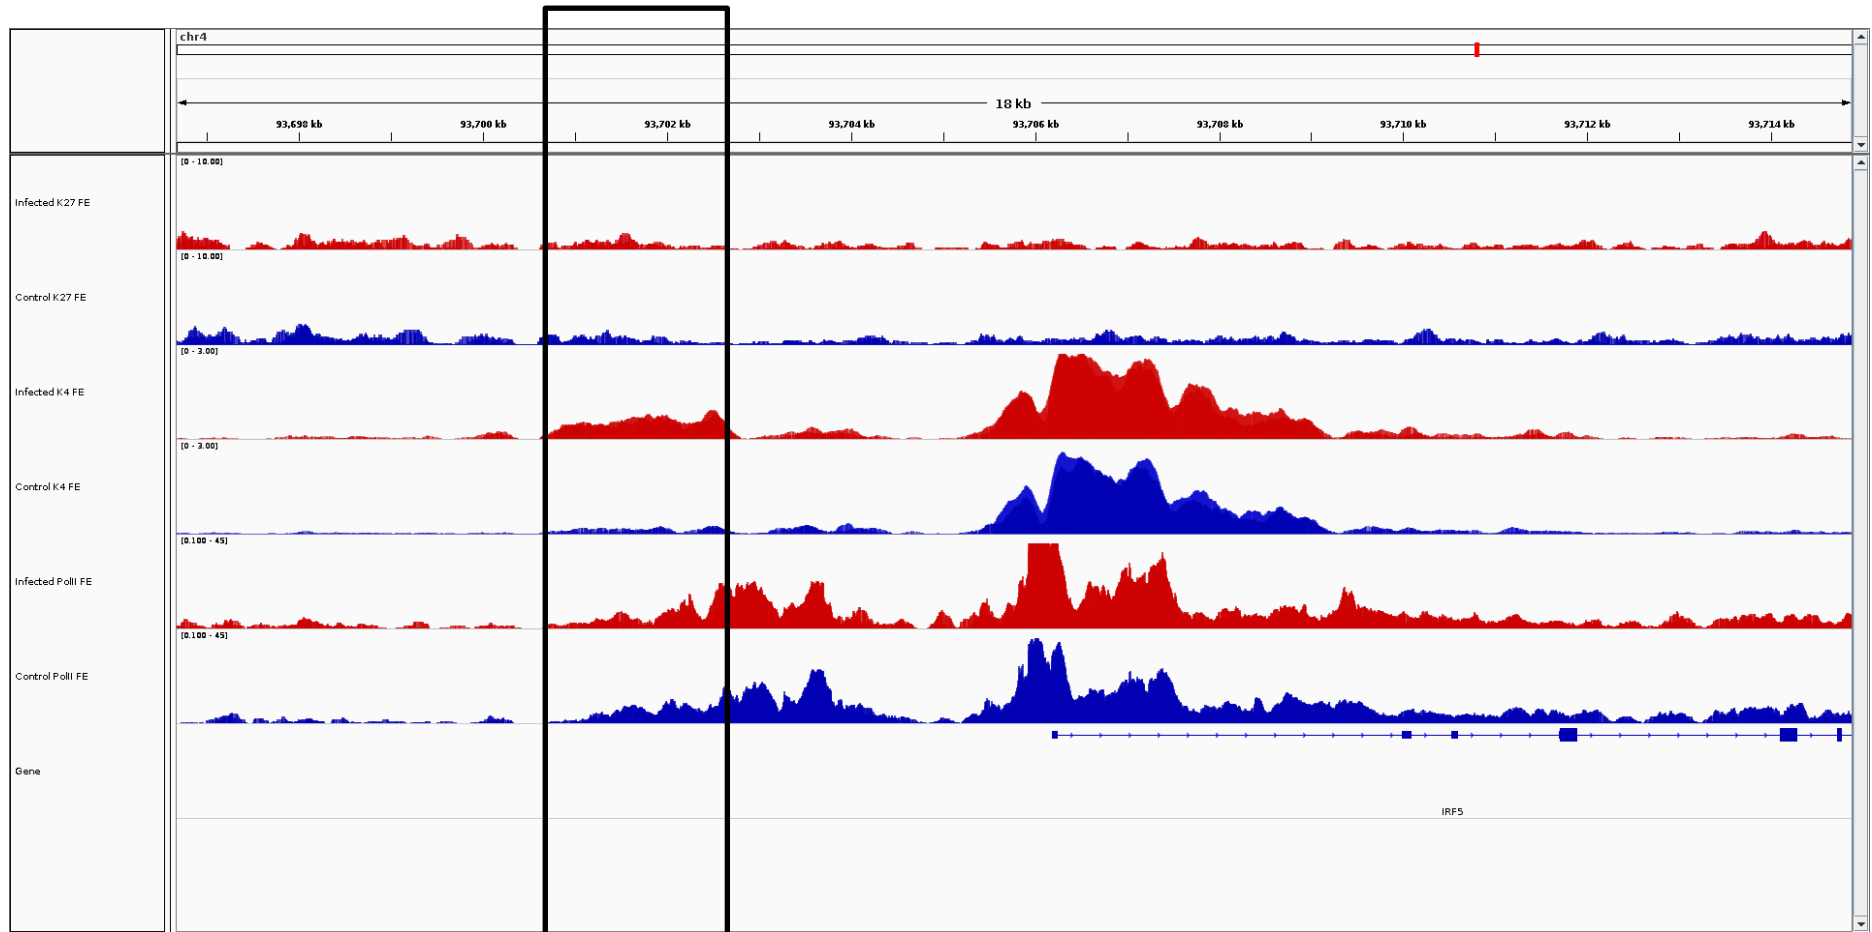

***IRF5***

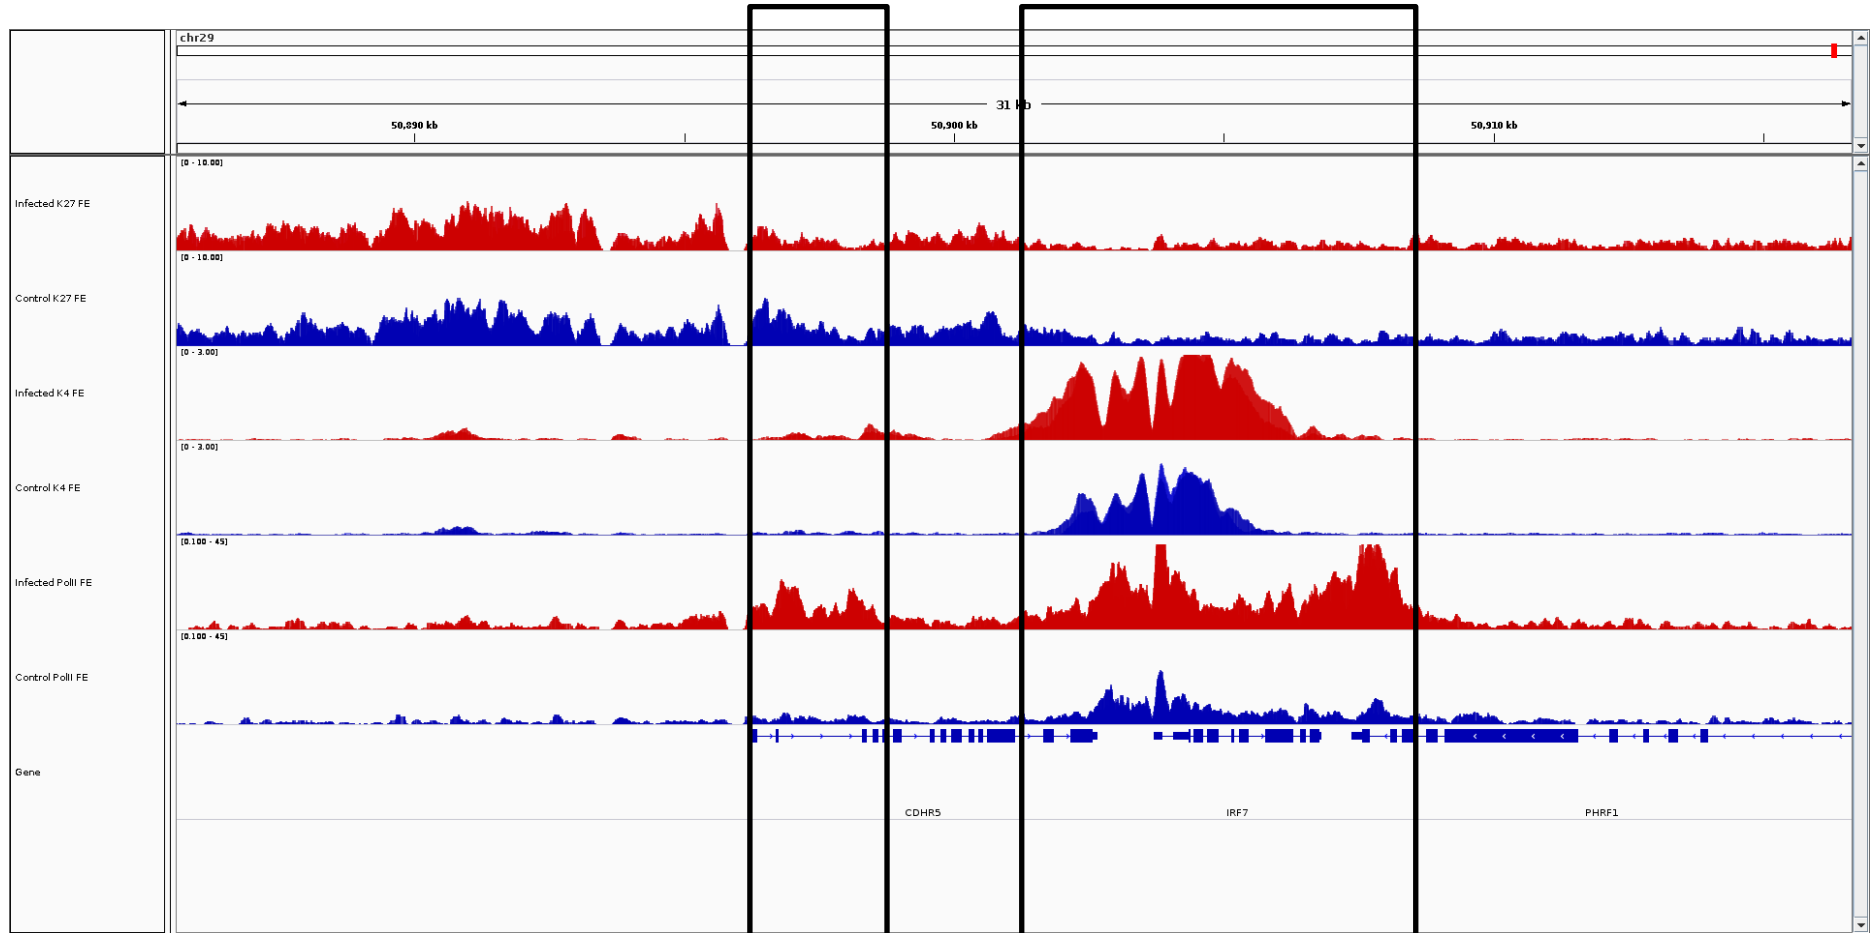

***IRF7***

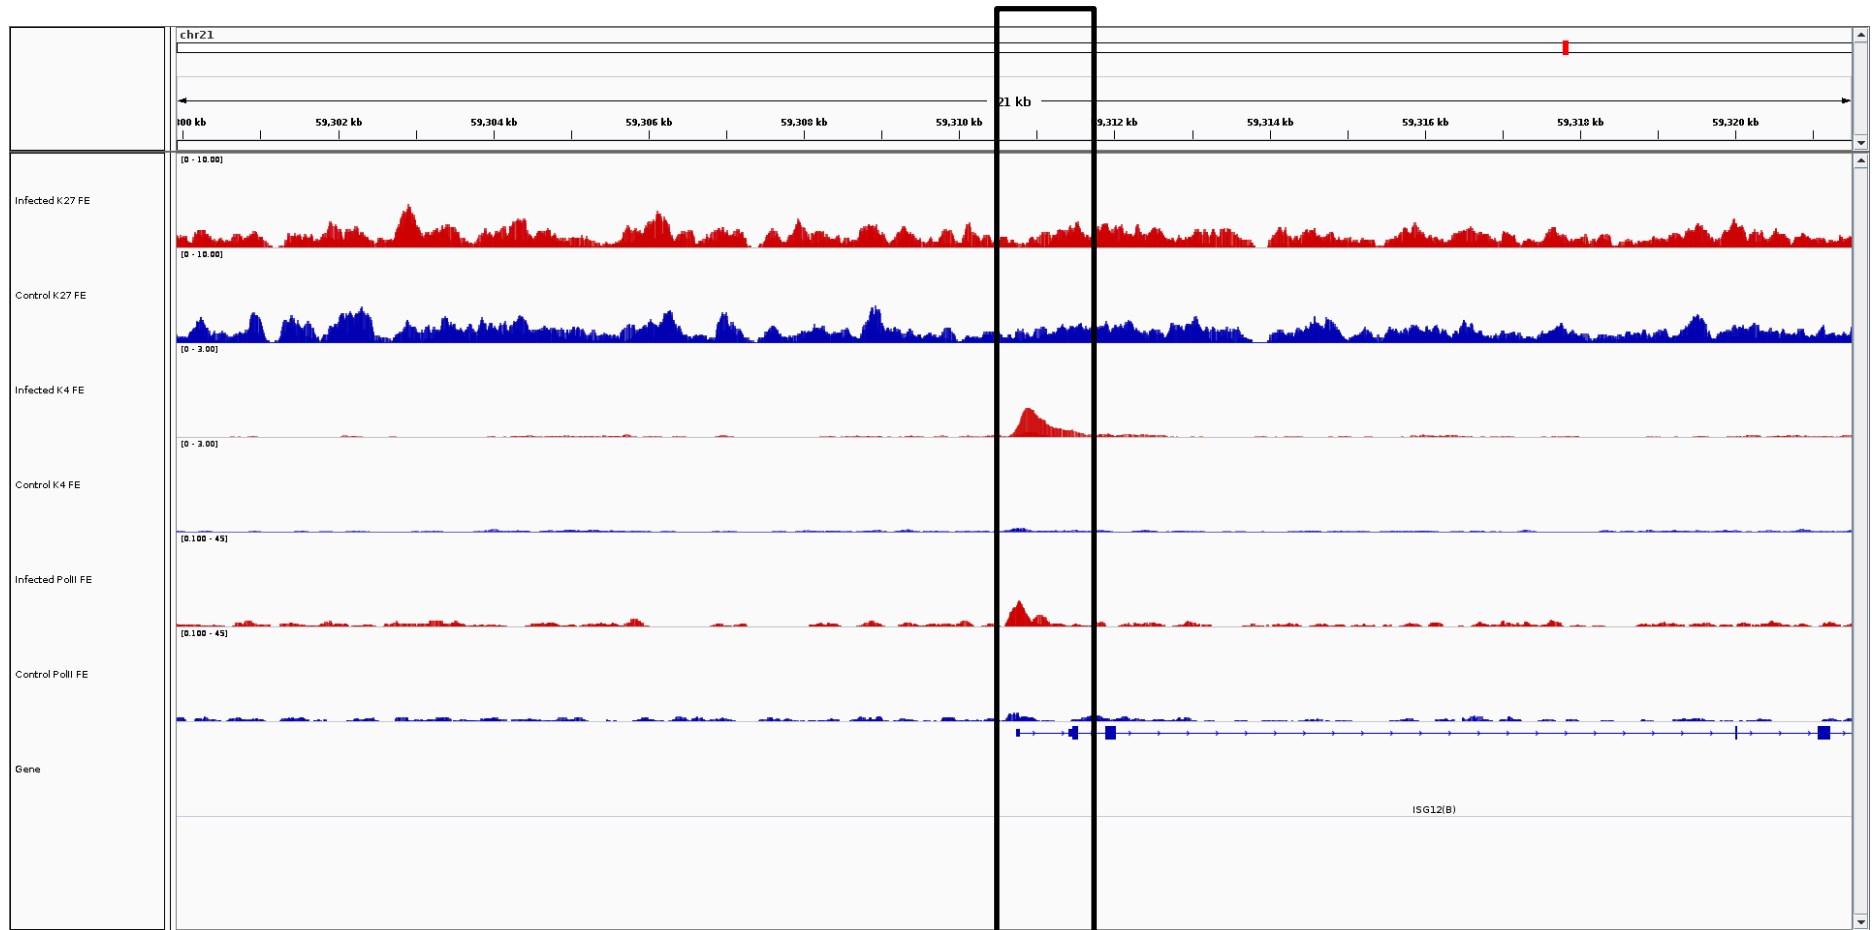

***ISG12B***

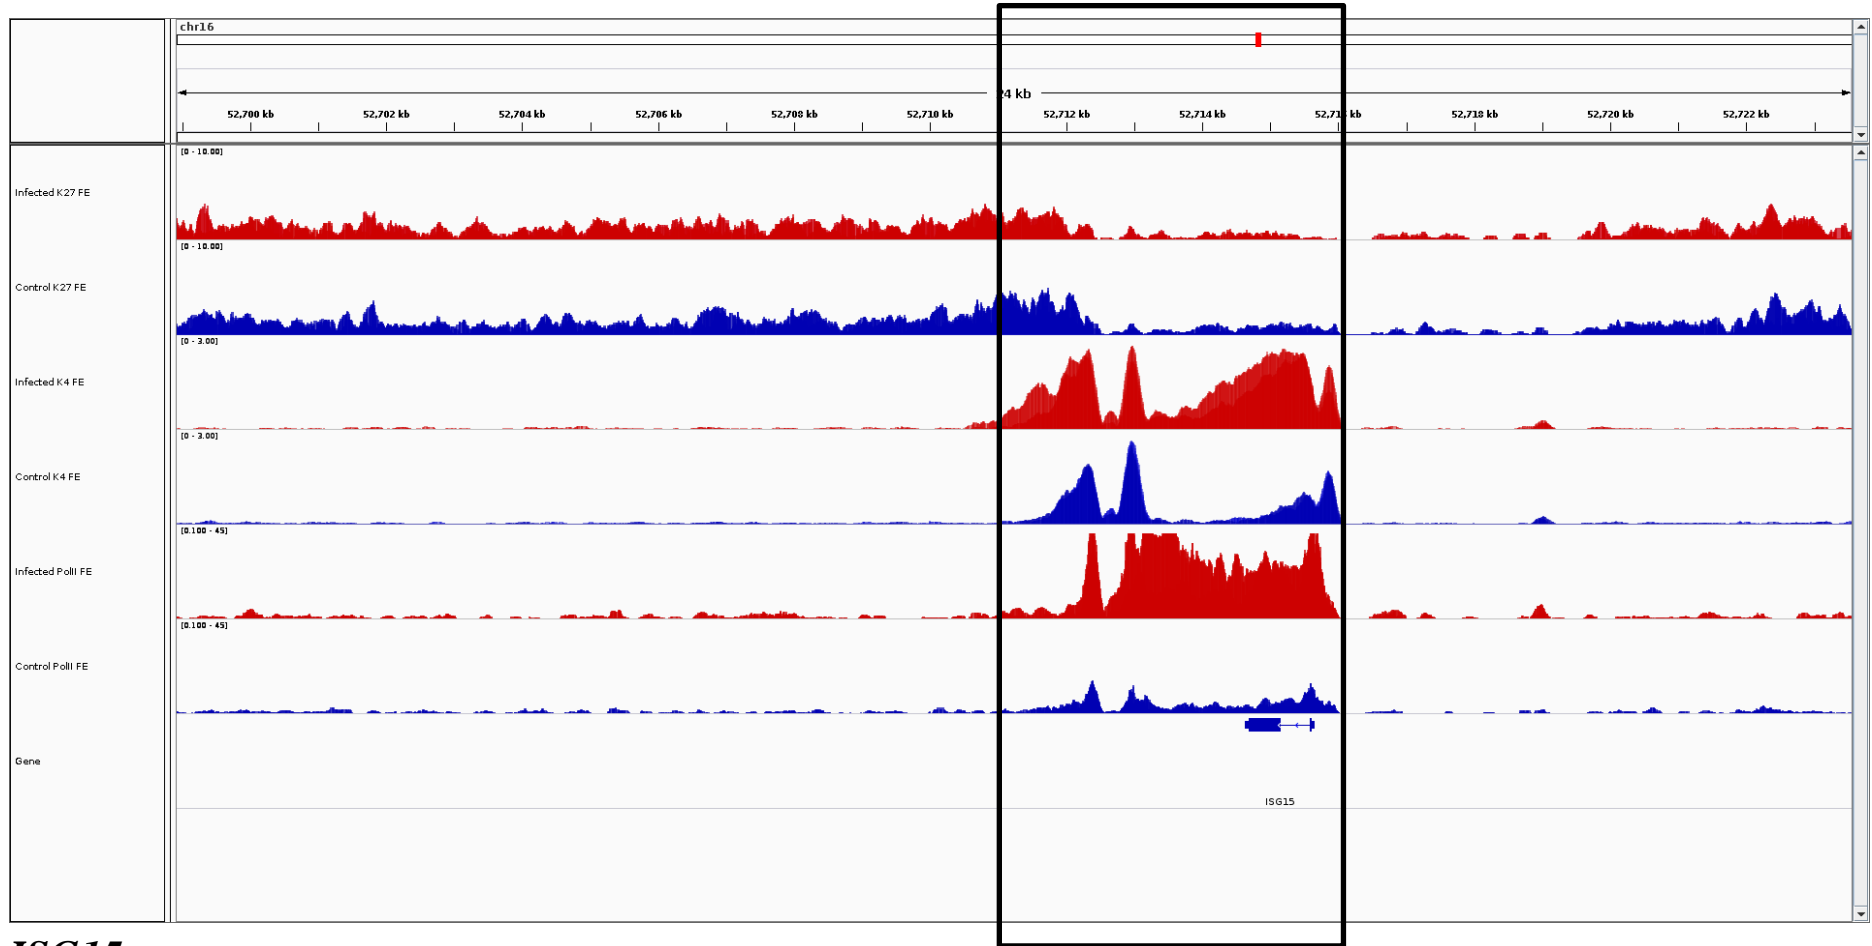

*ISG15*

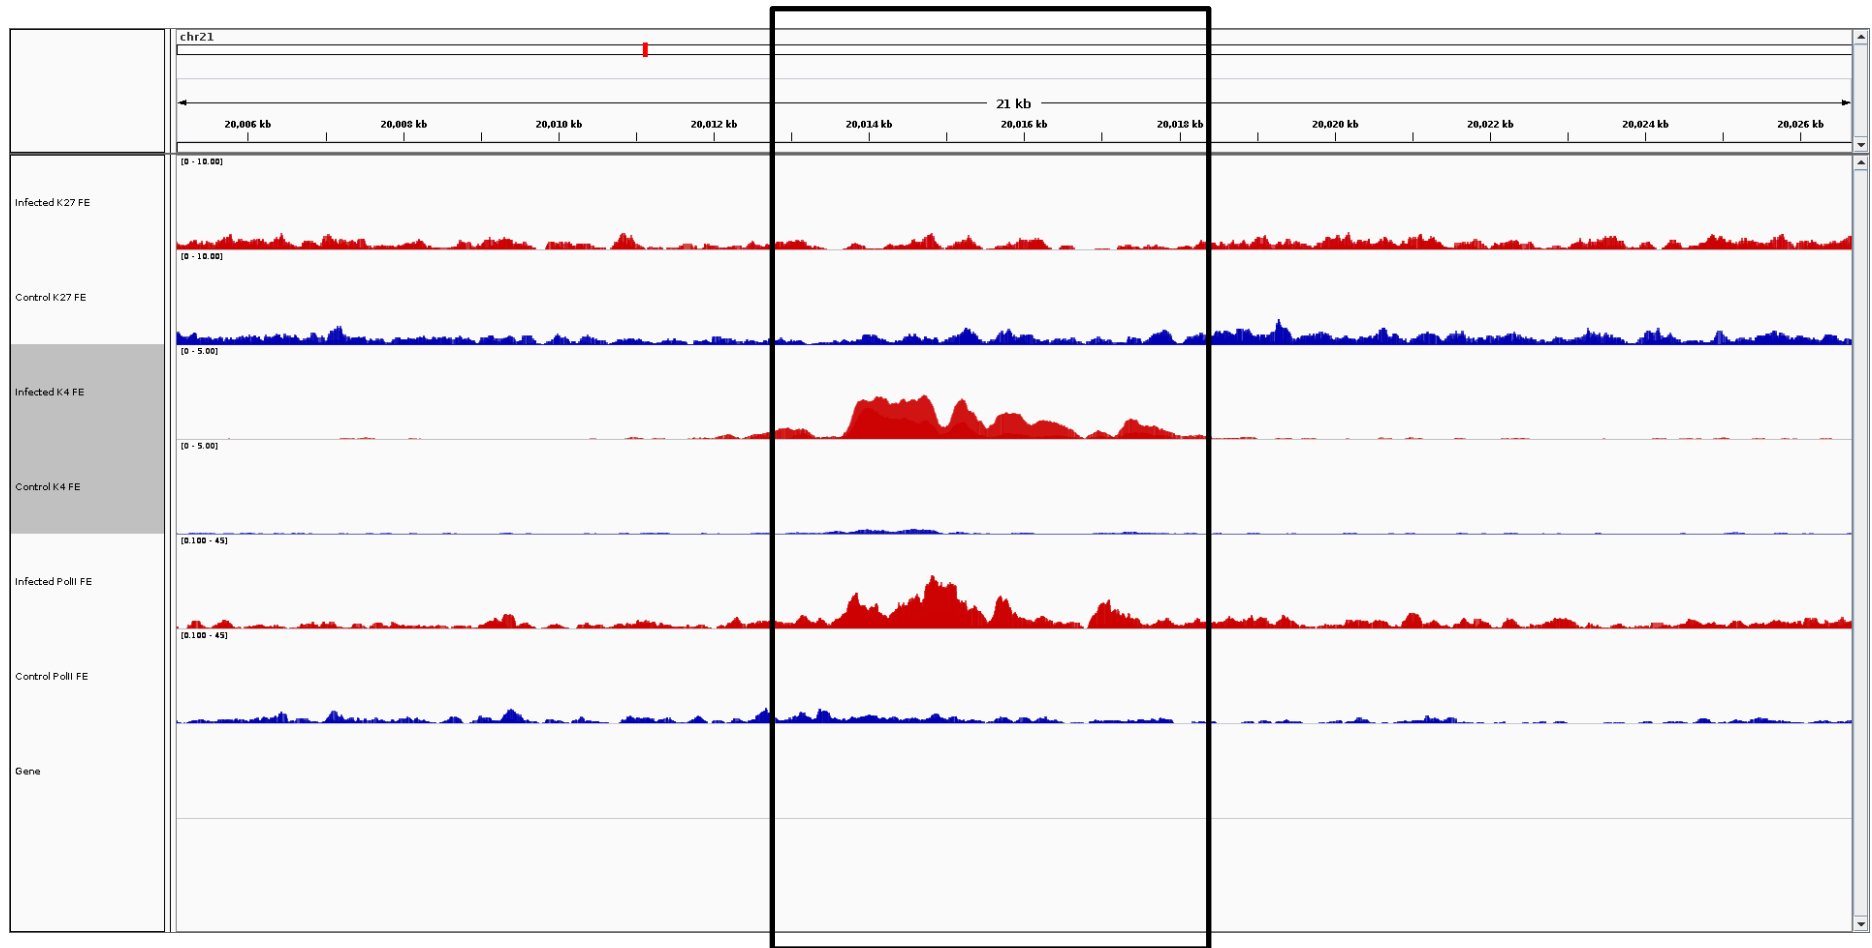

*ISG20*

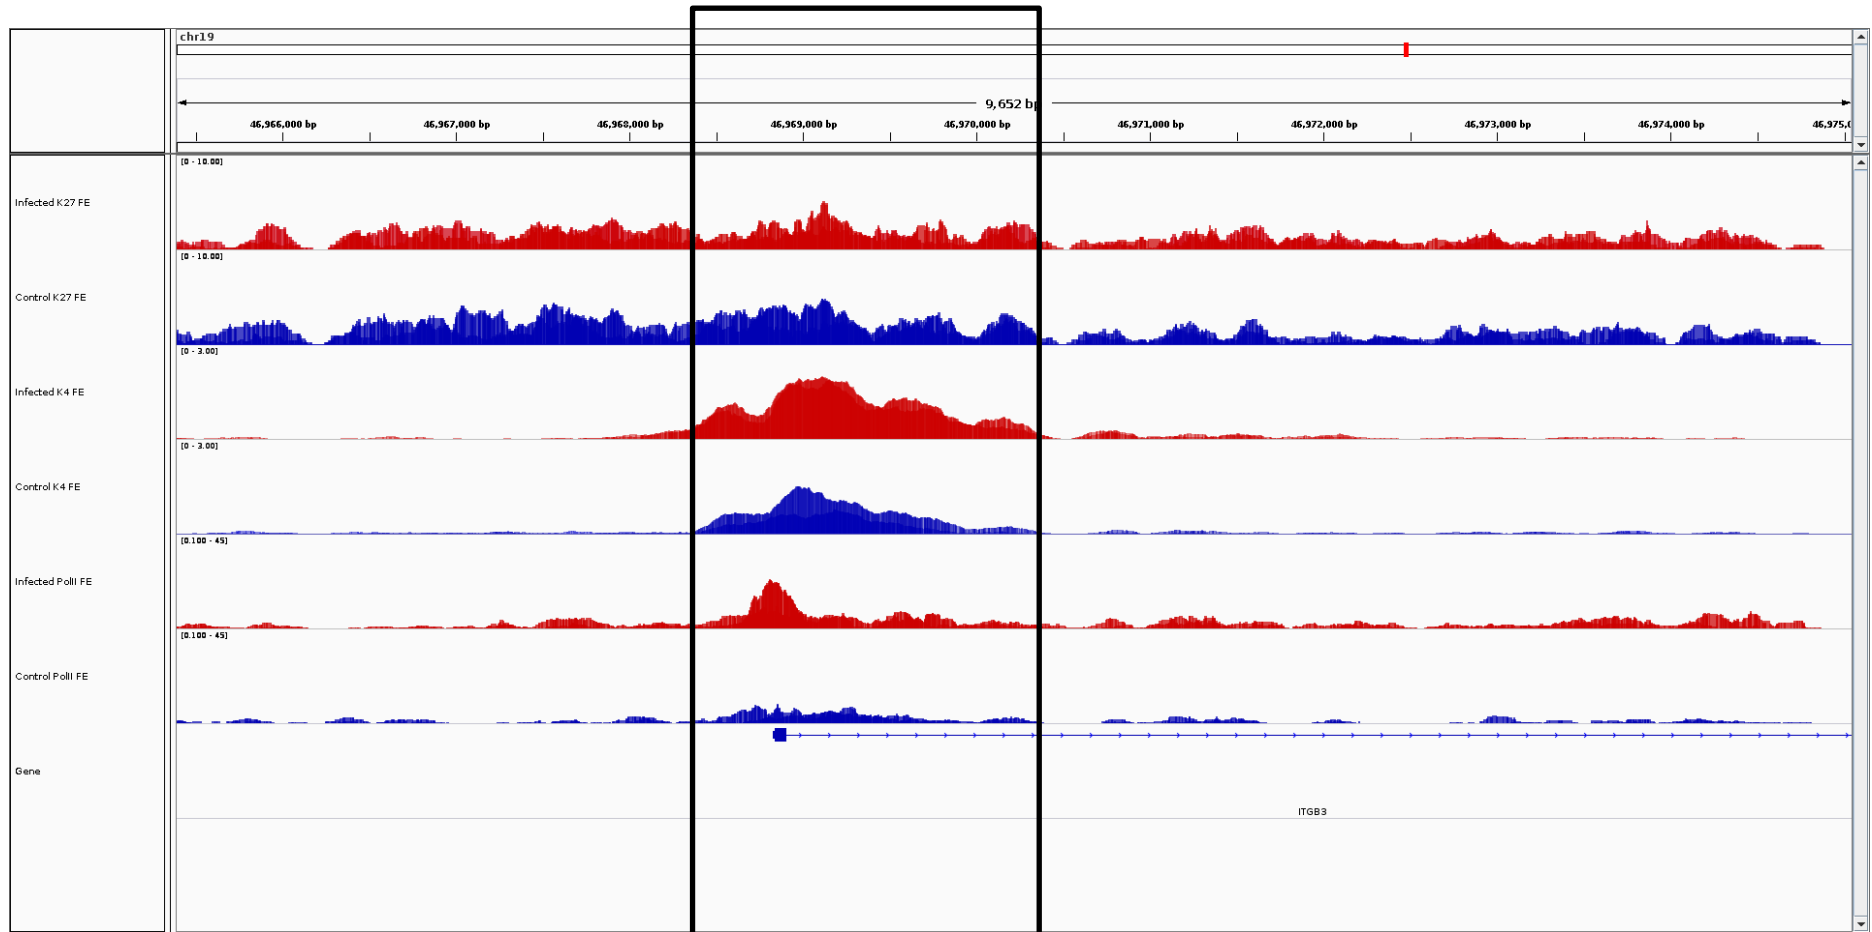

*ITGB3*

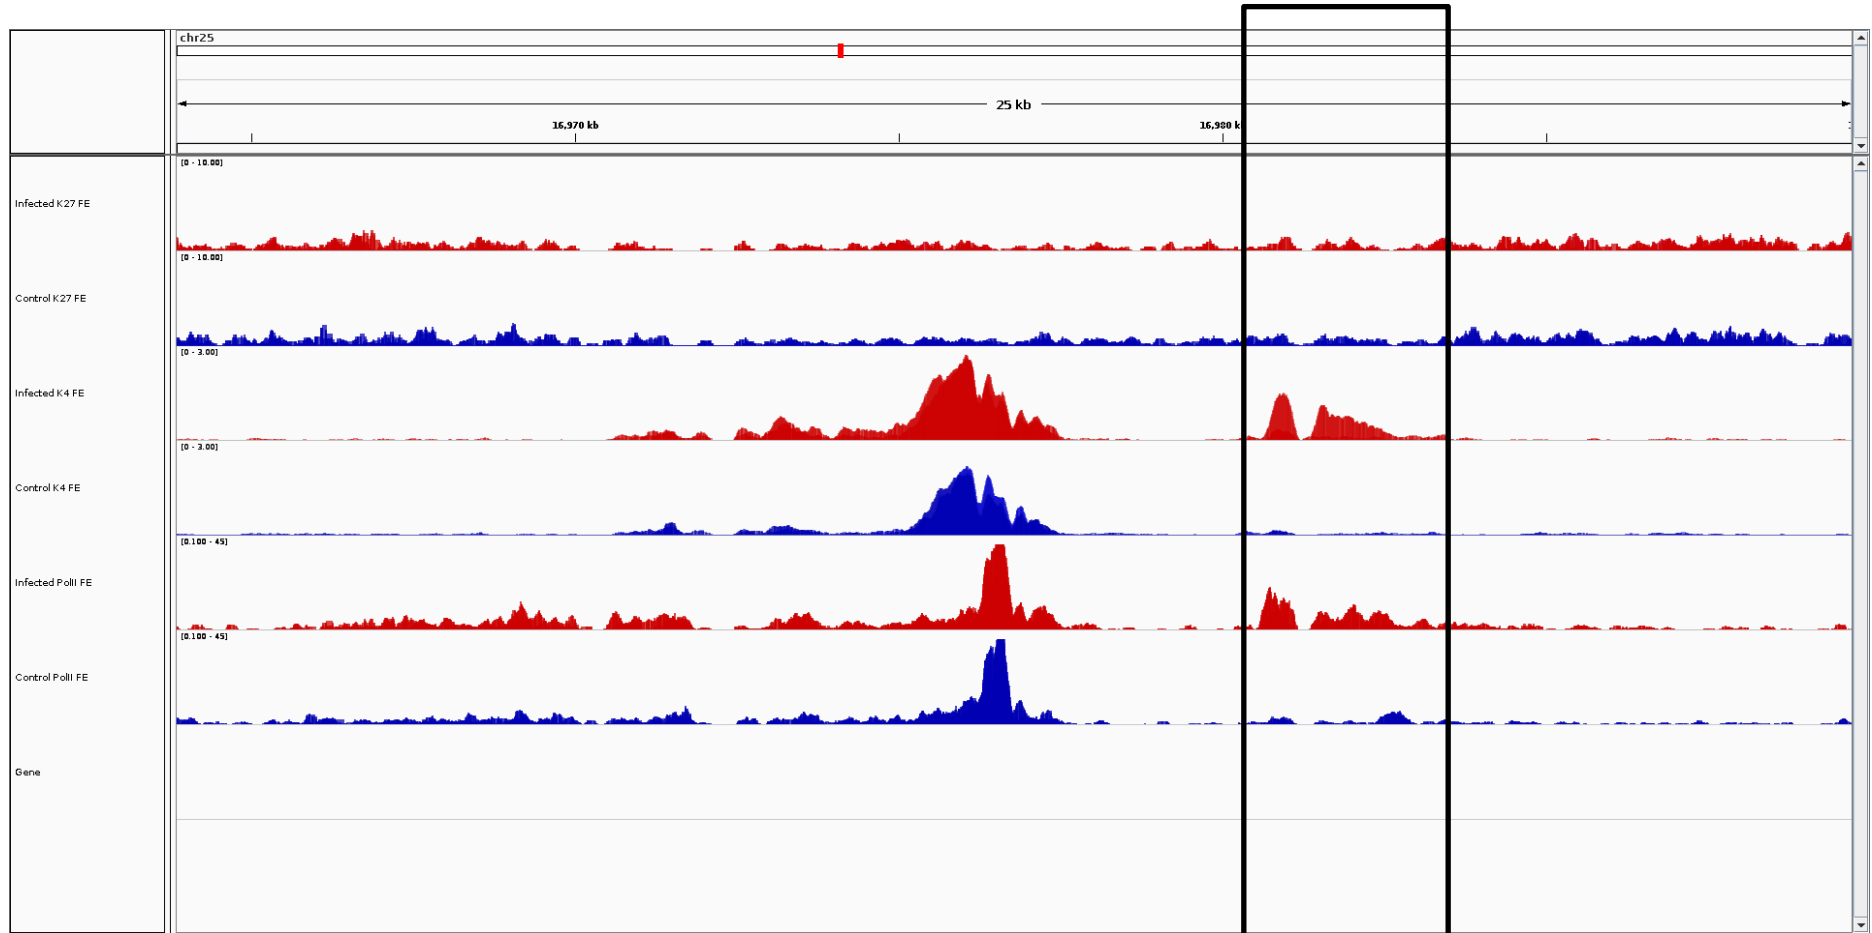

*ITPRIPL2*

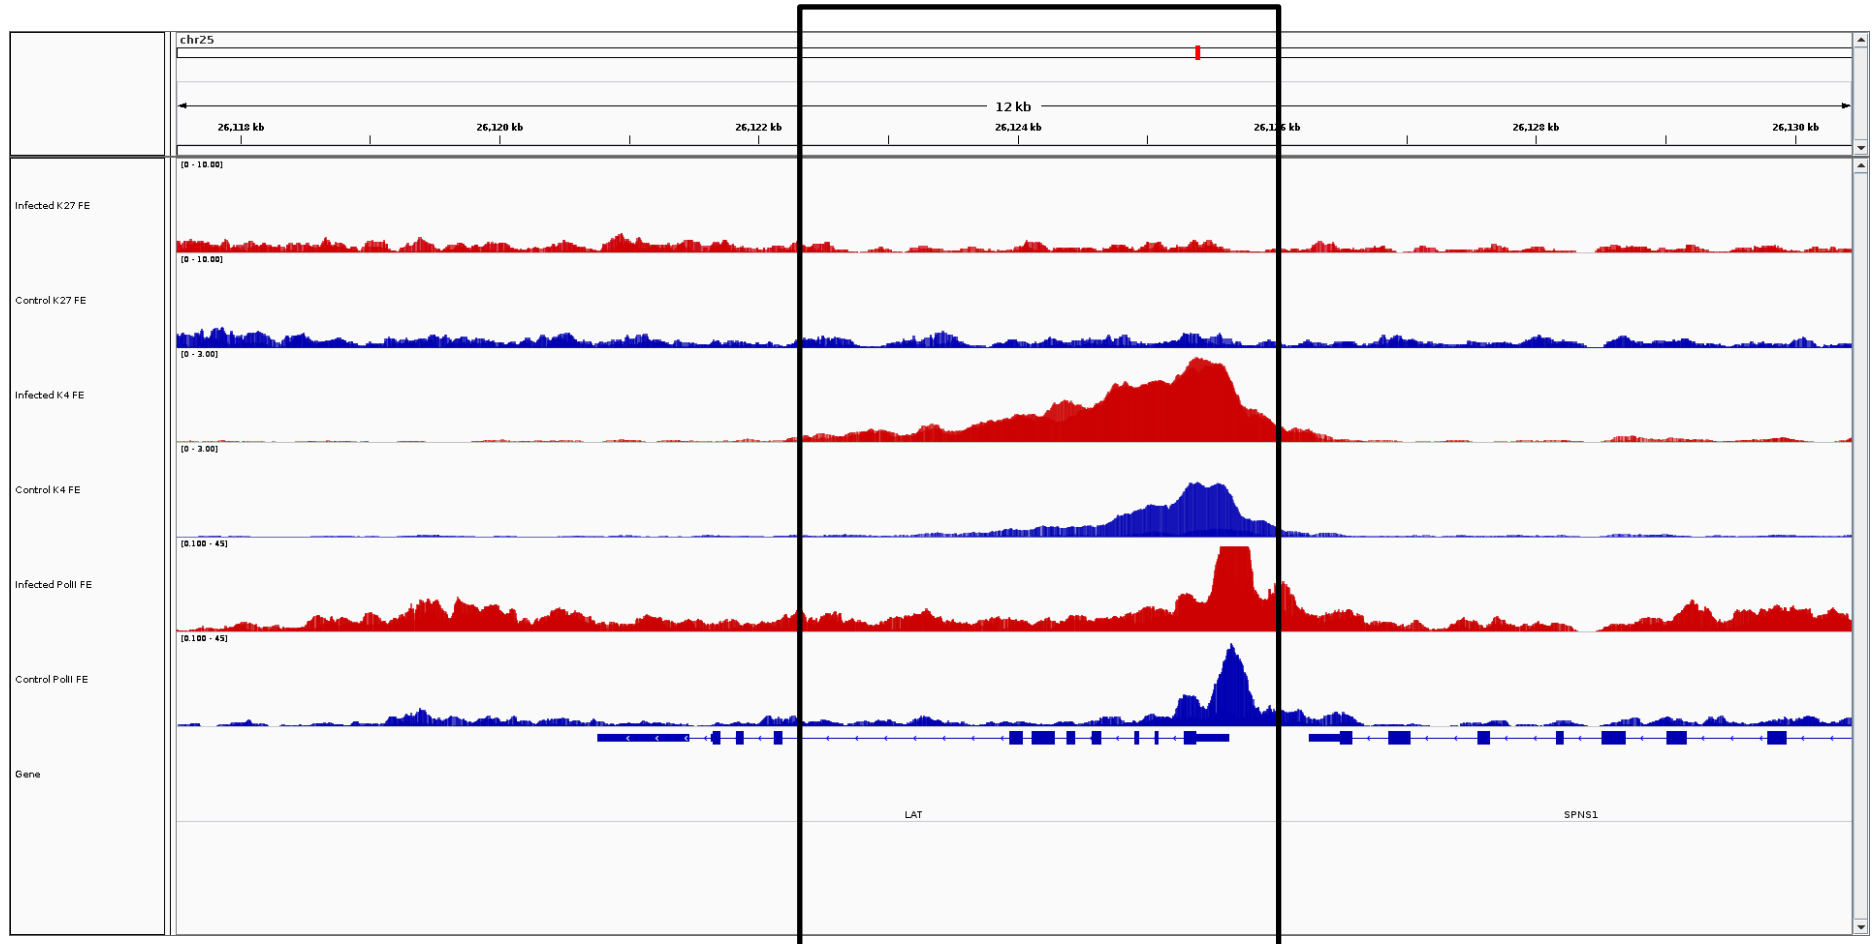

*LAT*



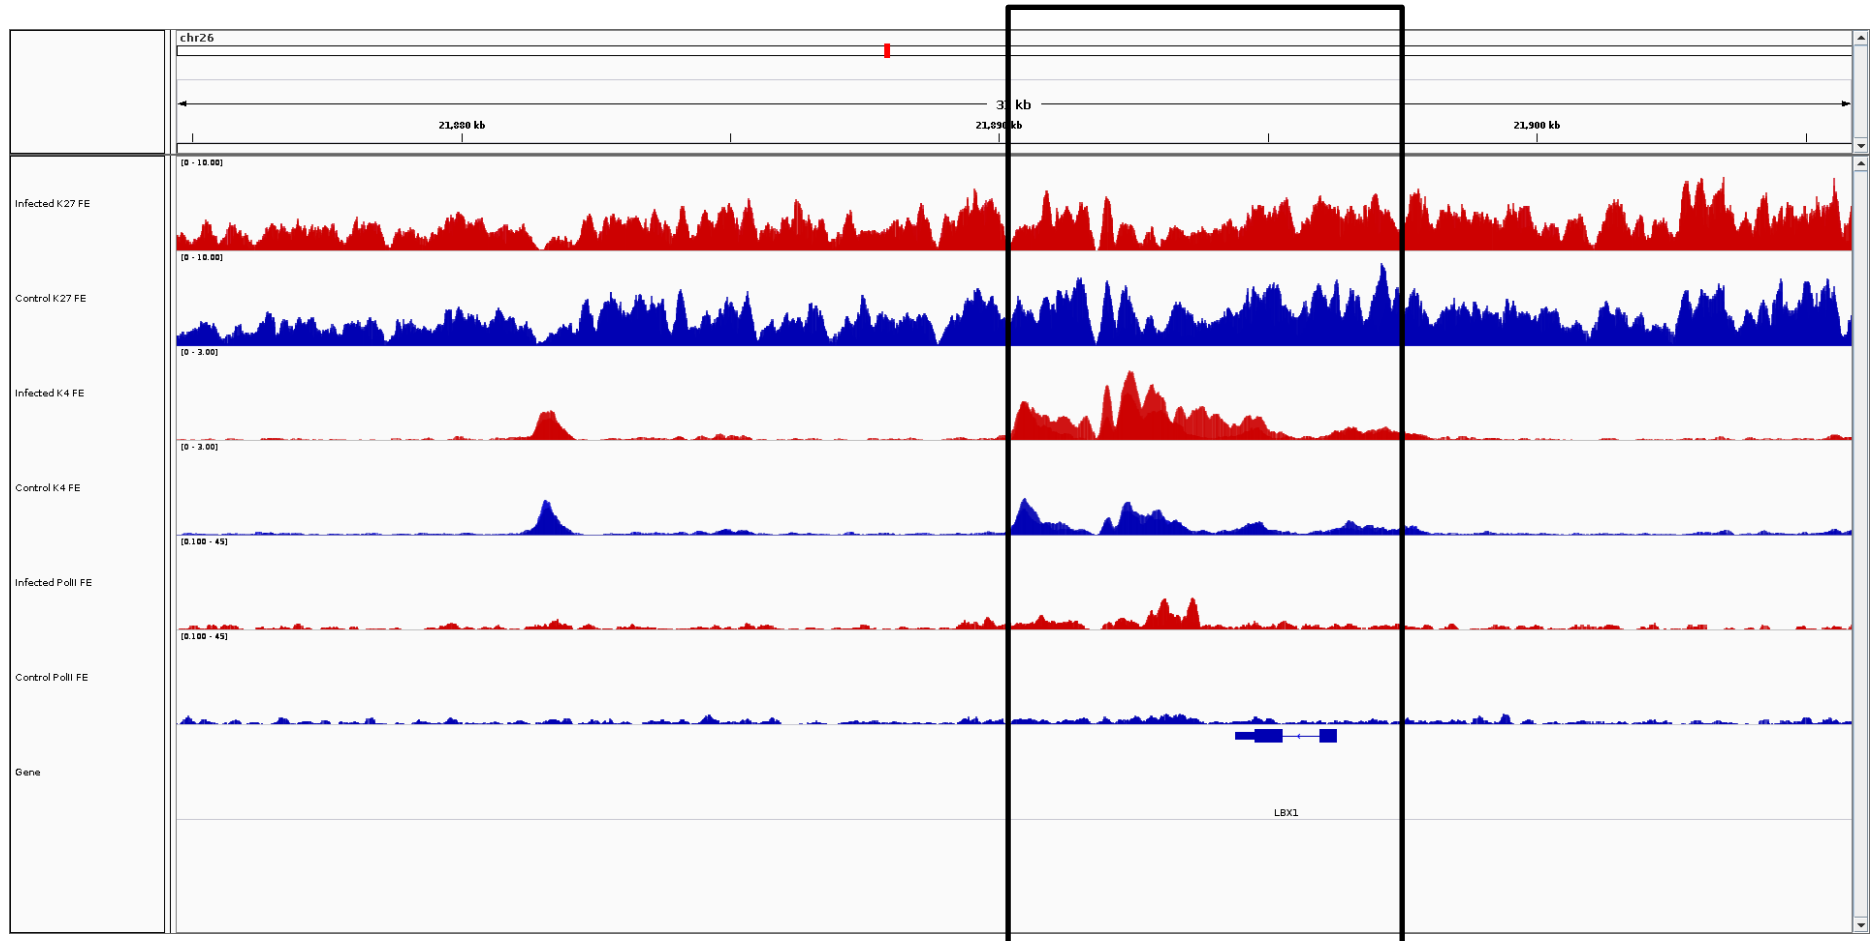

***LBX1***

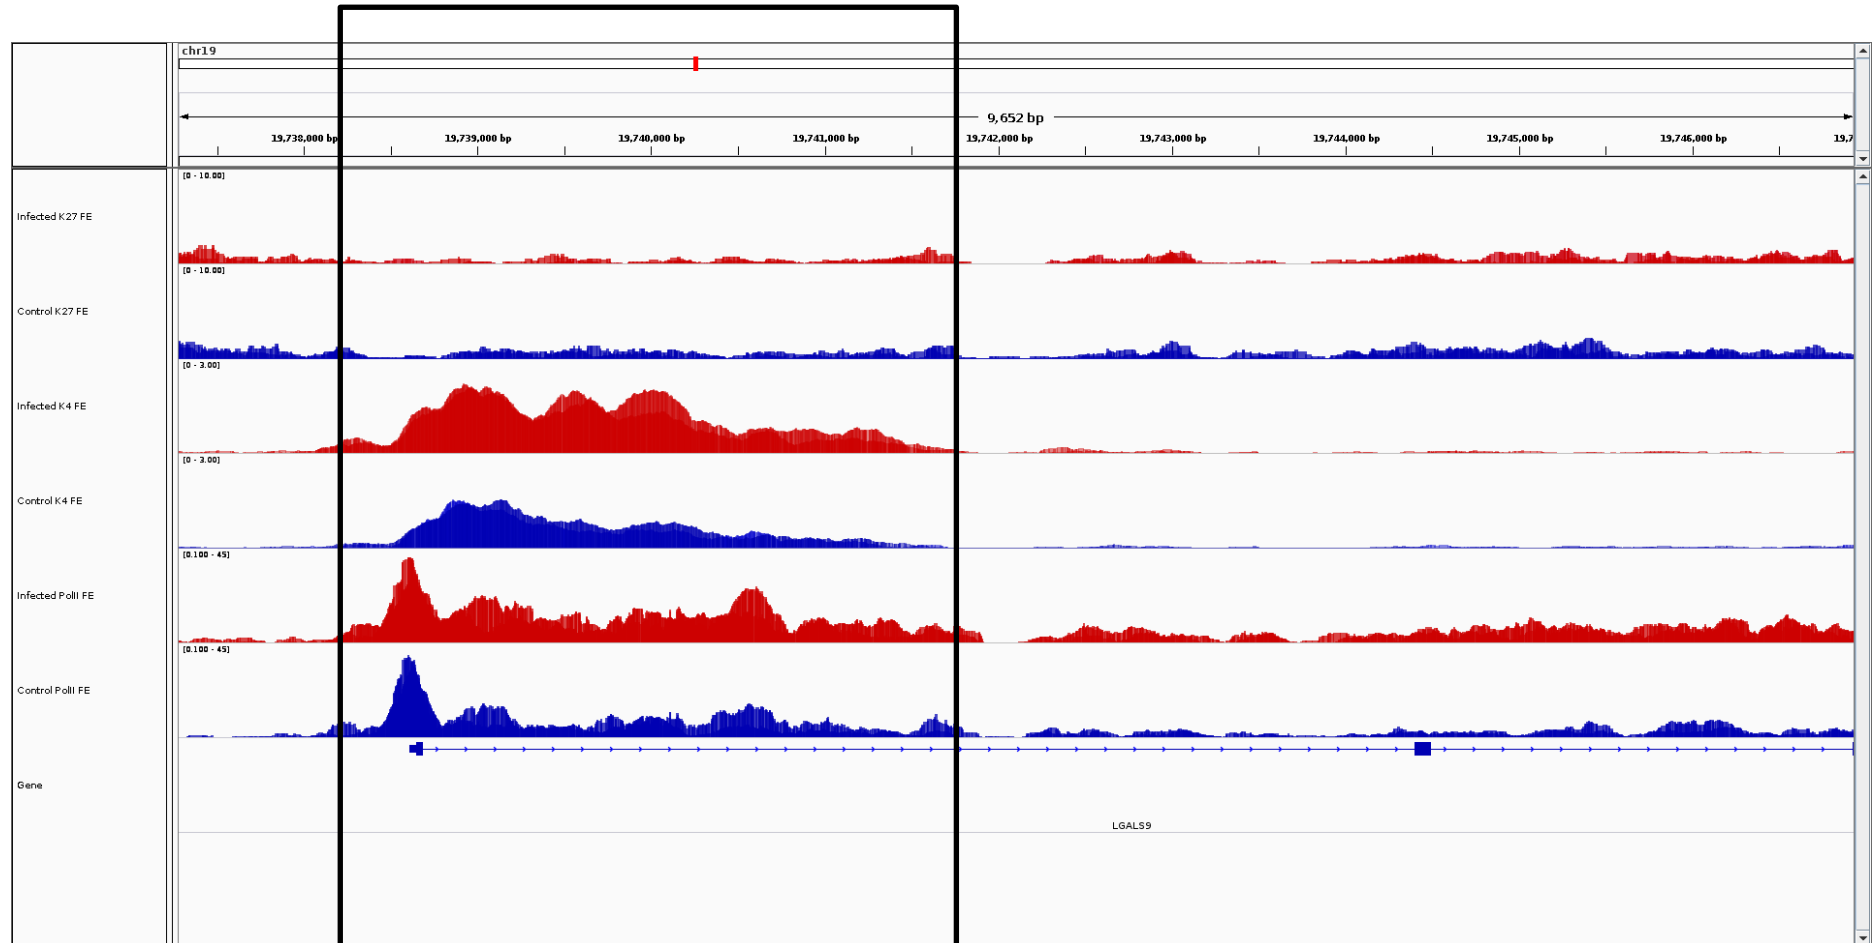

***LGALS9***

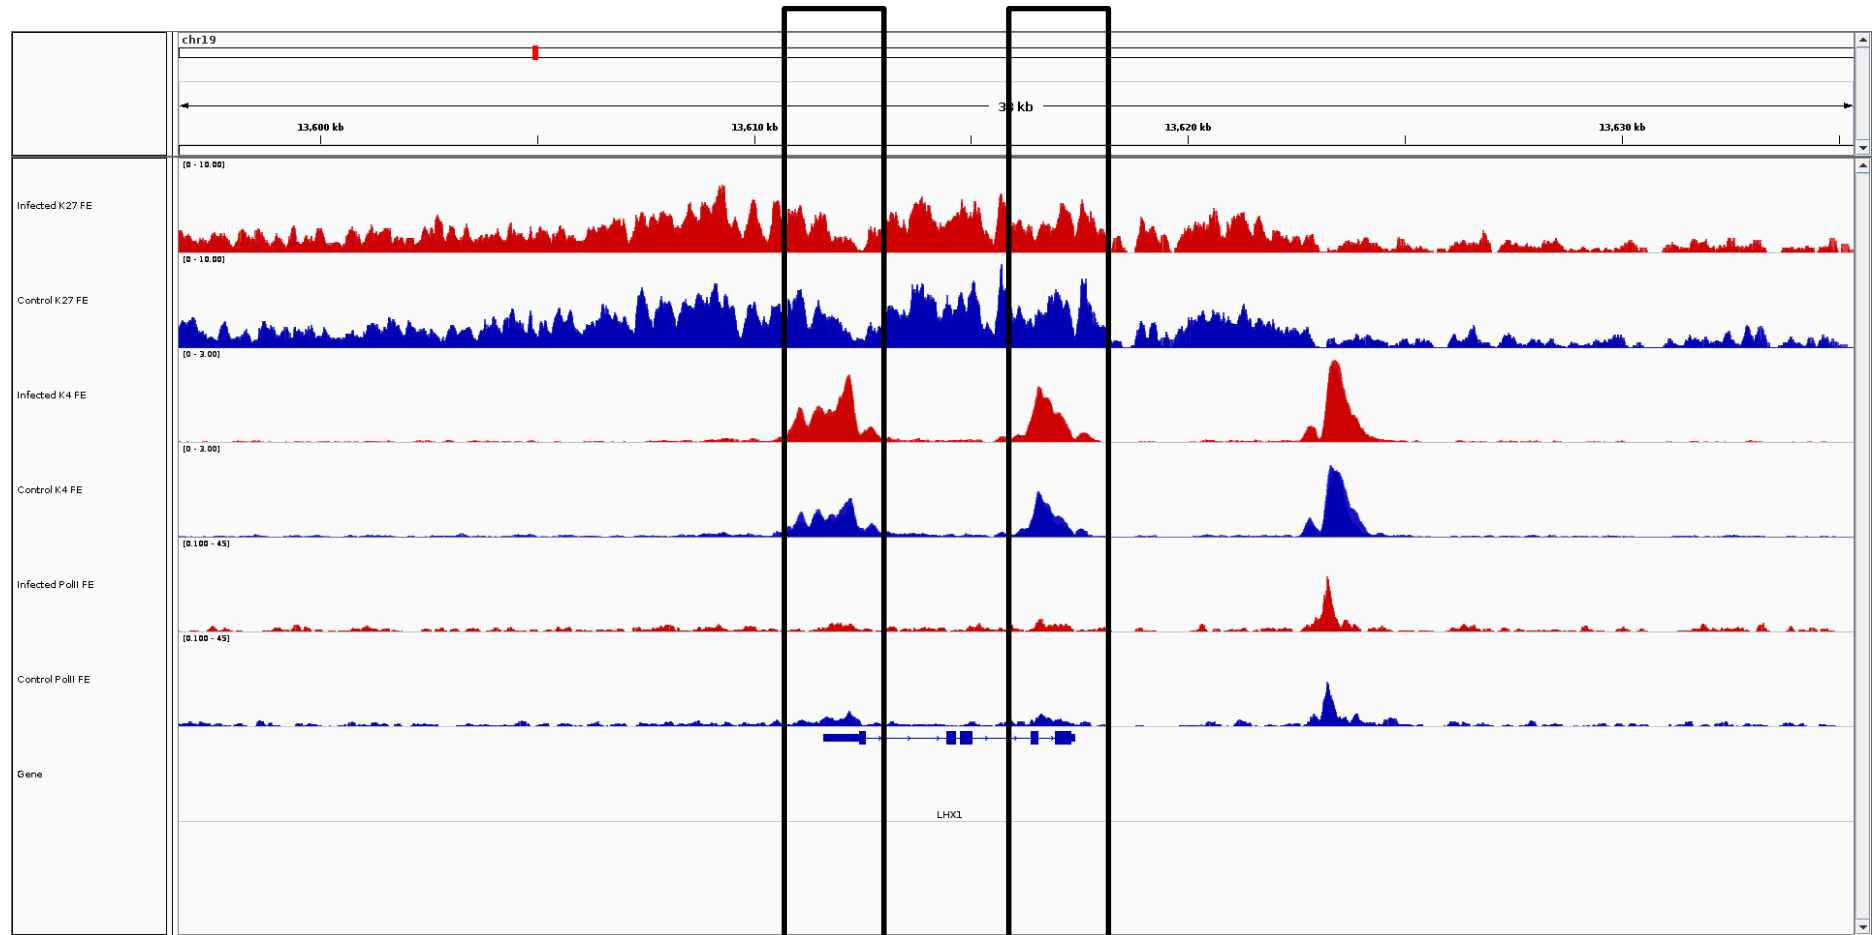

***LHX1***

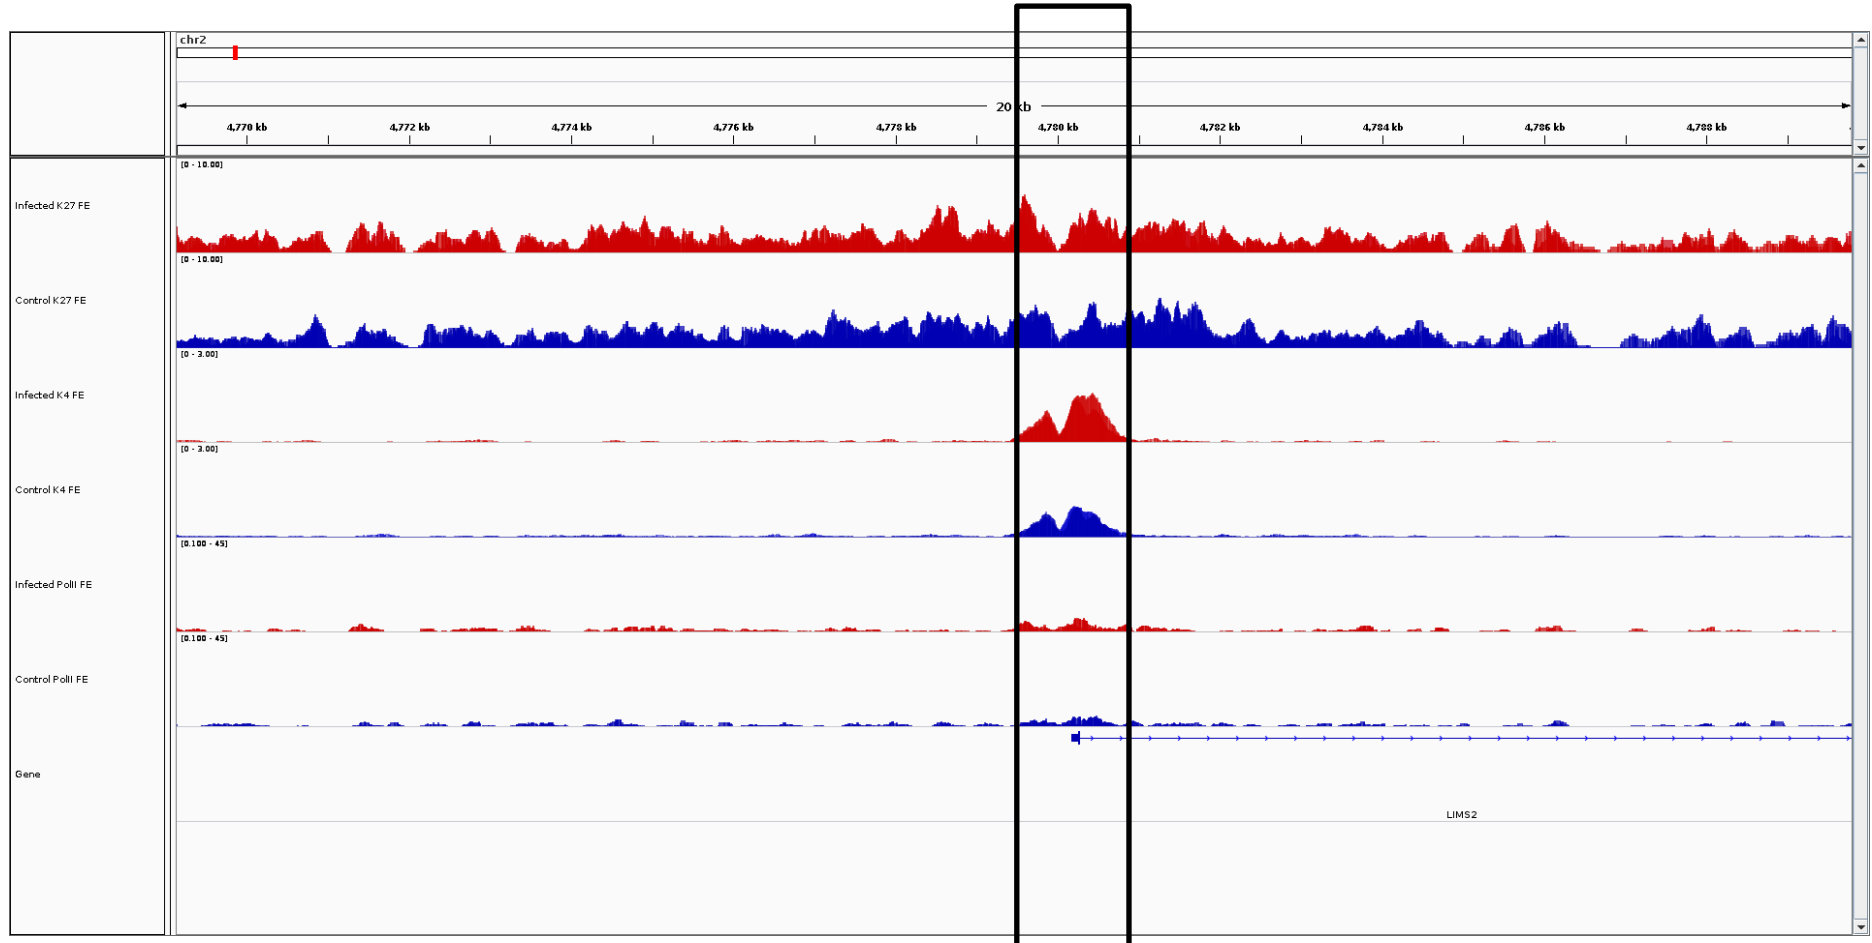

***LIMS2***

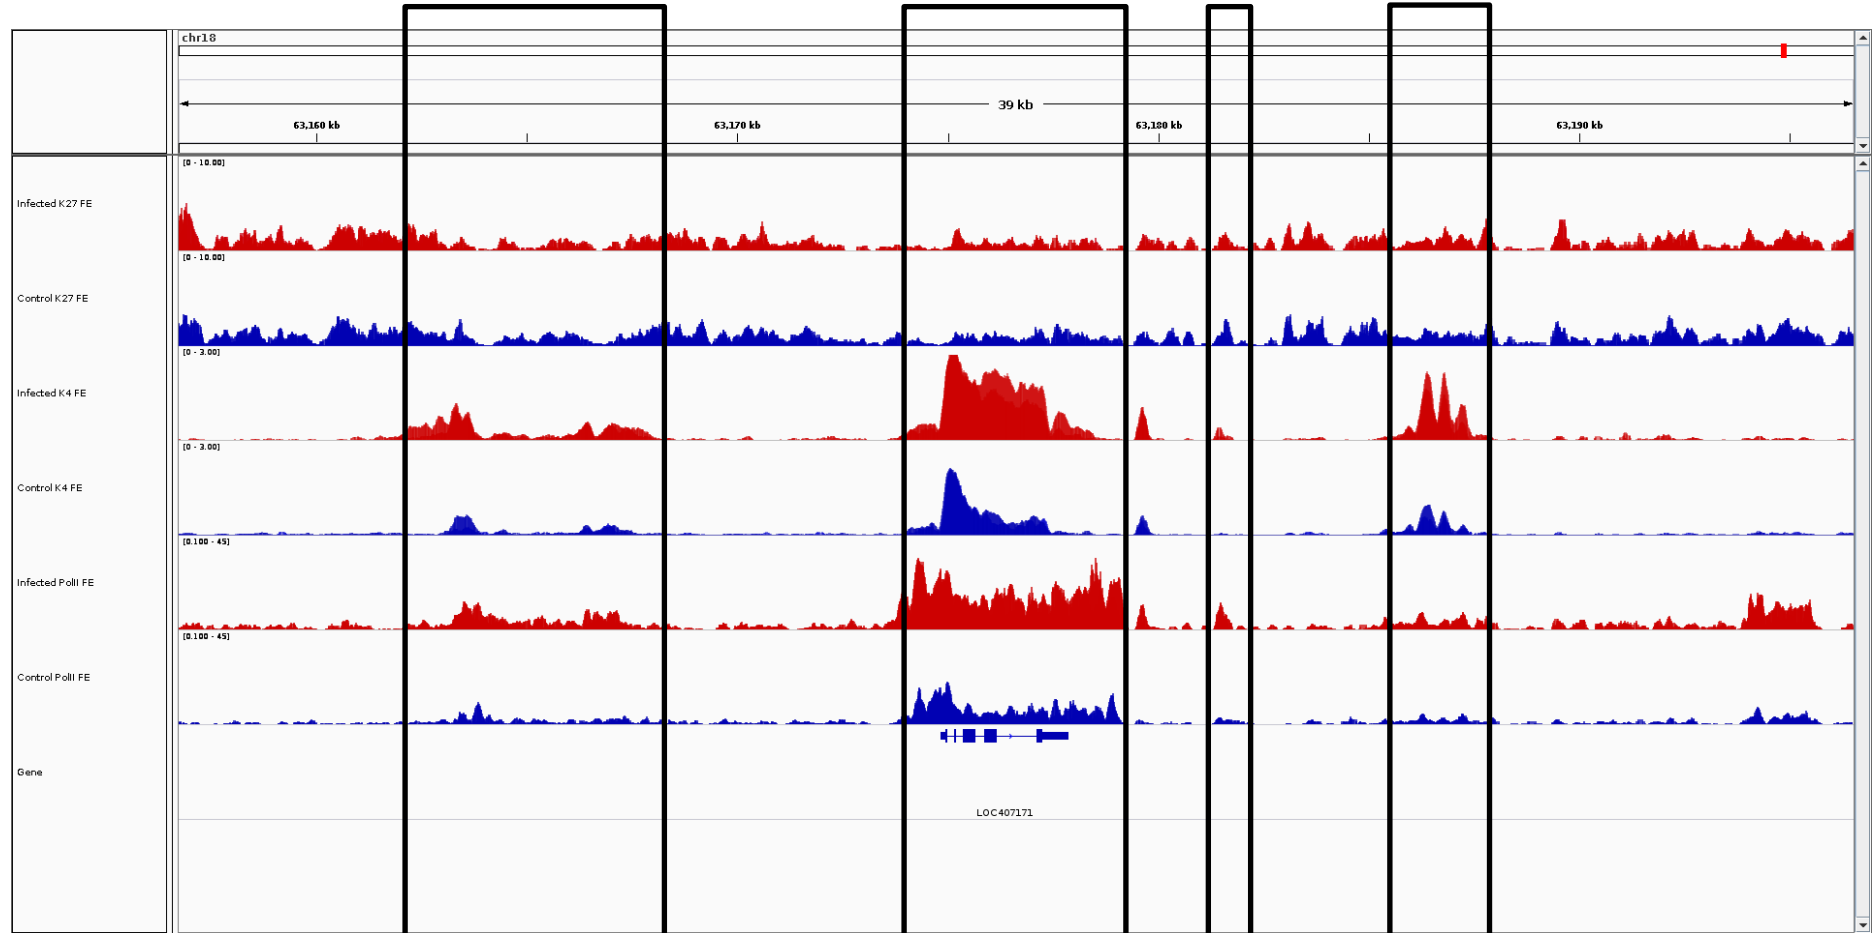

***LOC407171***

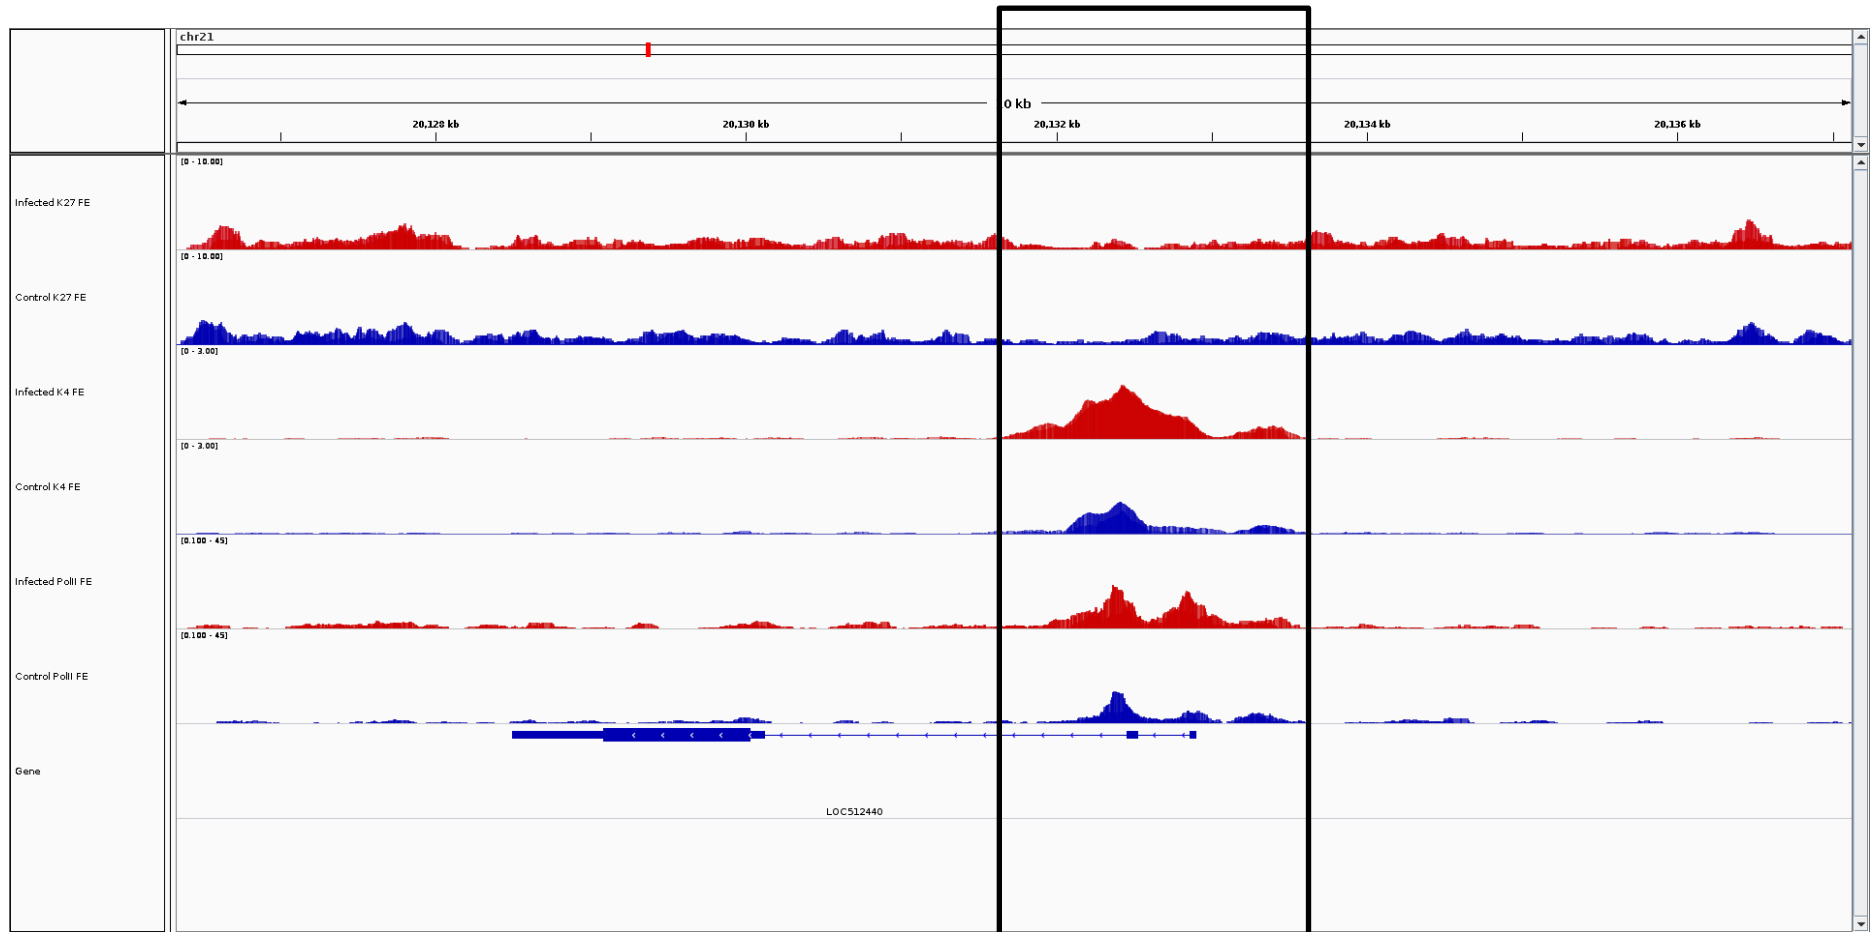

***LOC512440***

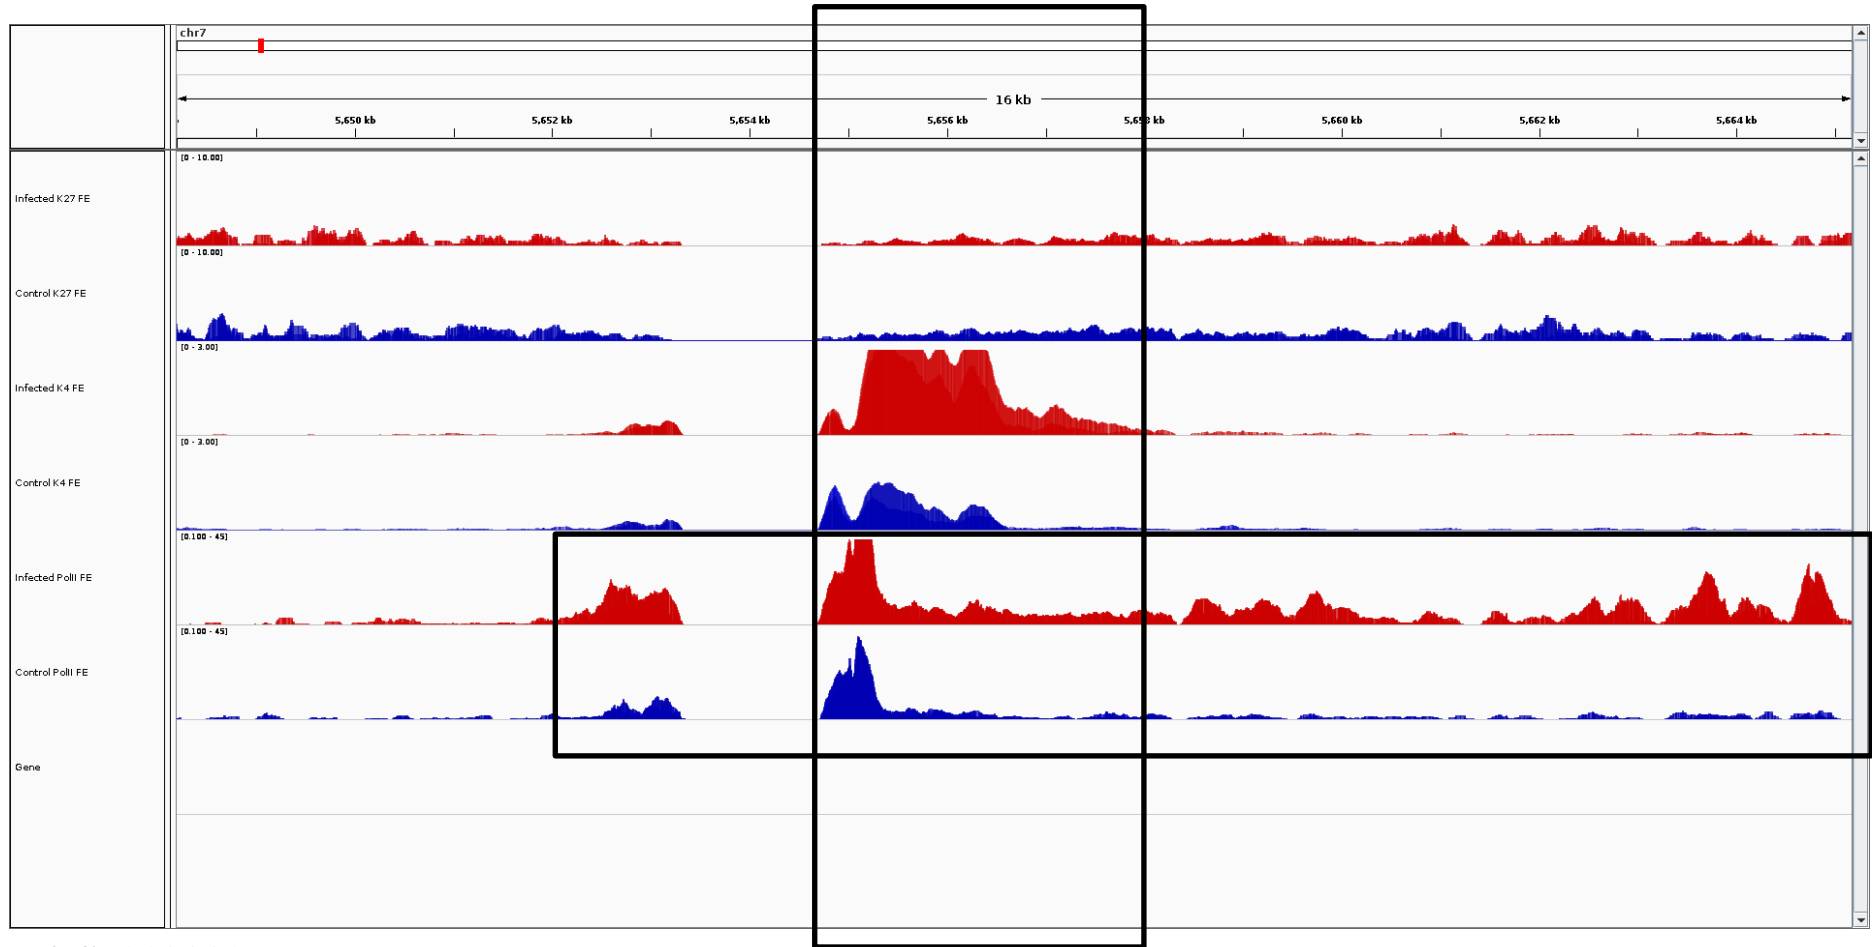

***LOC100298356***

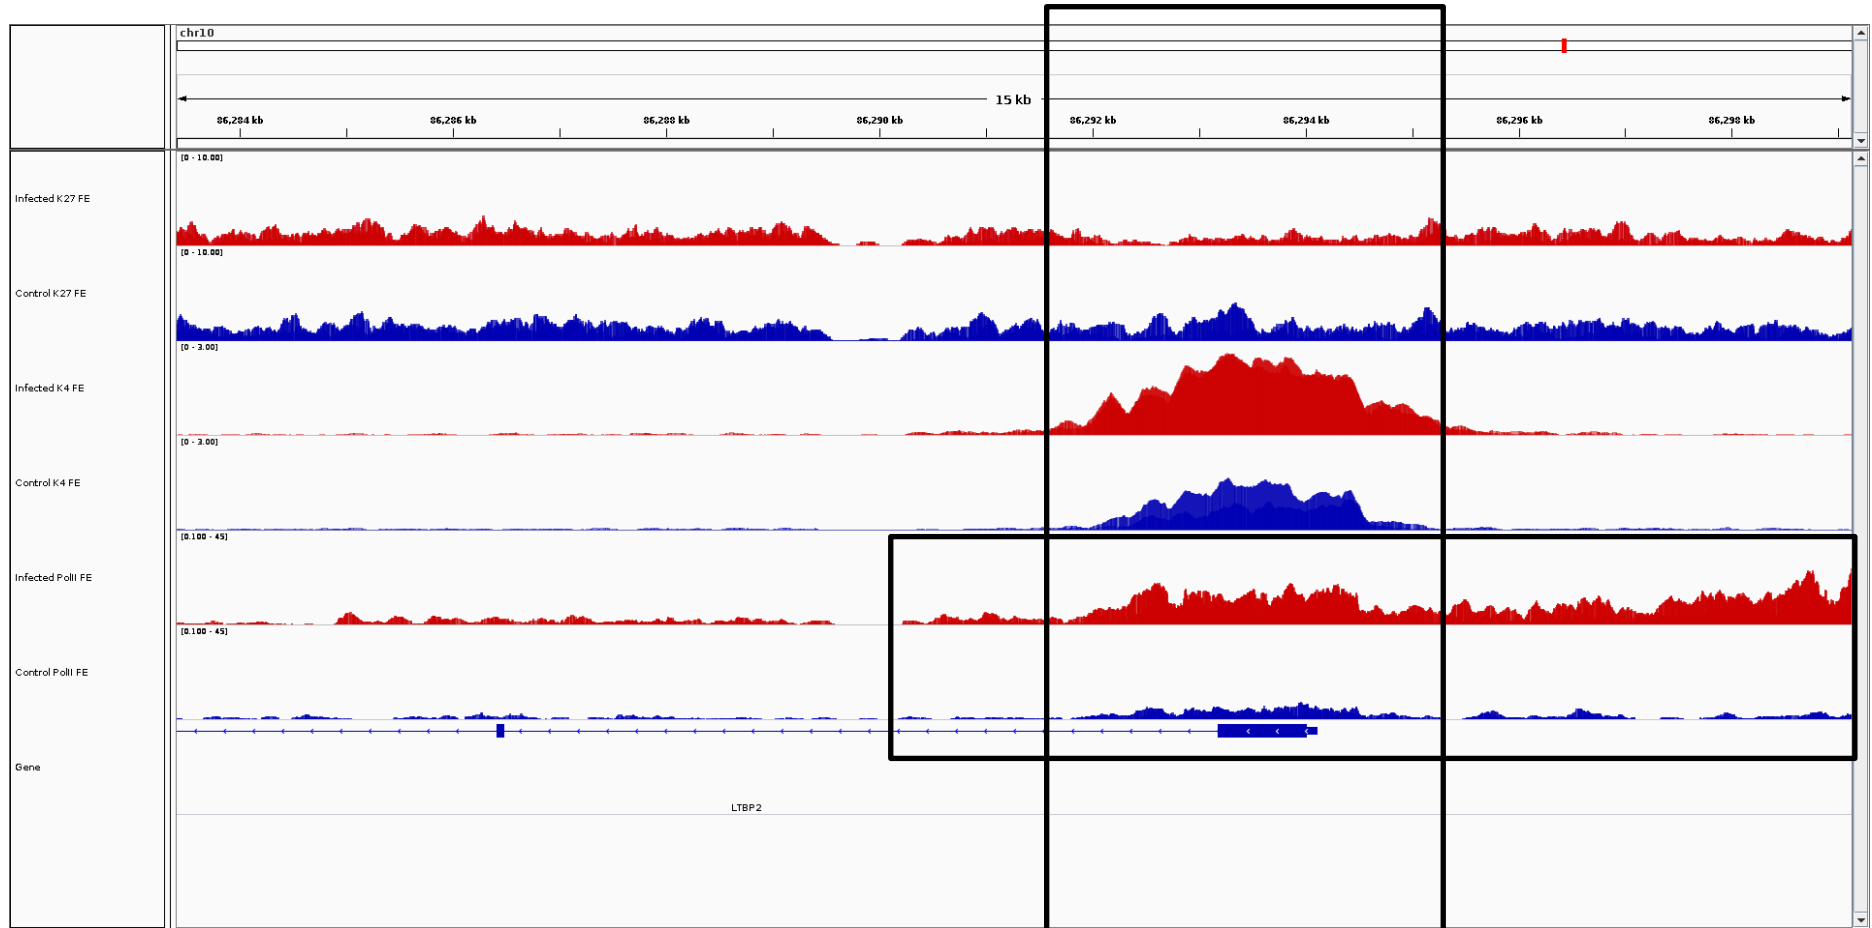

***LTBP2***



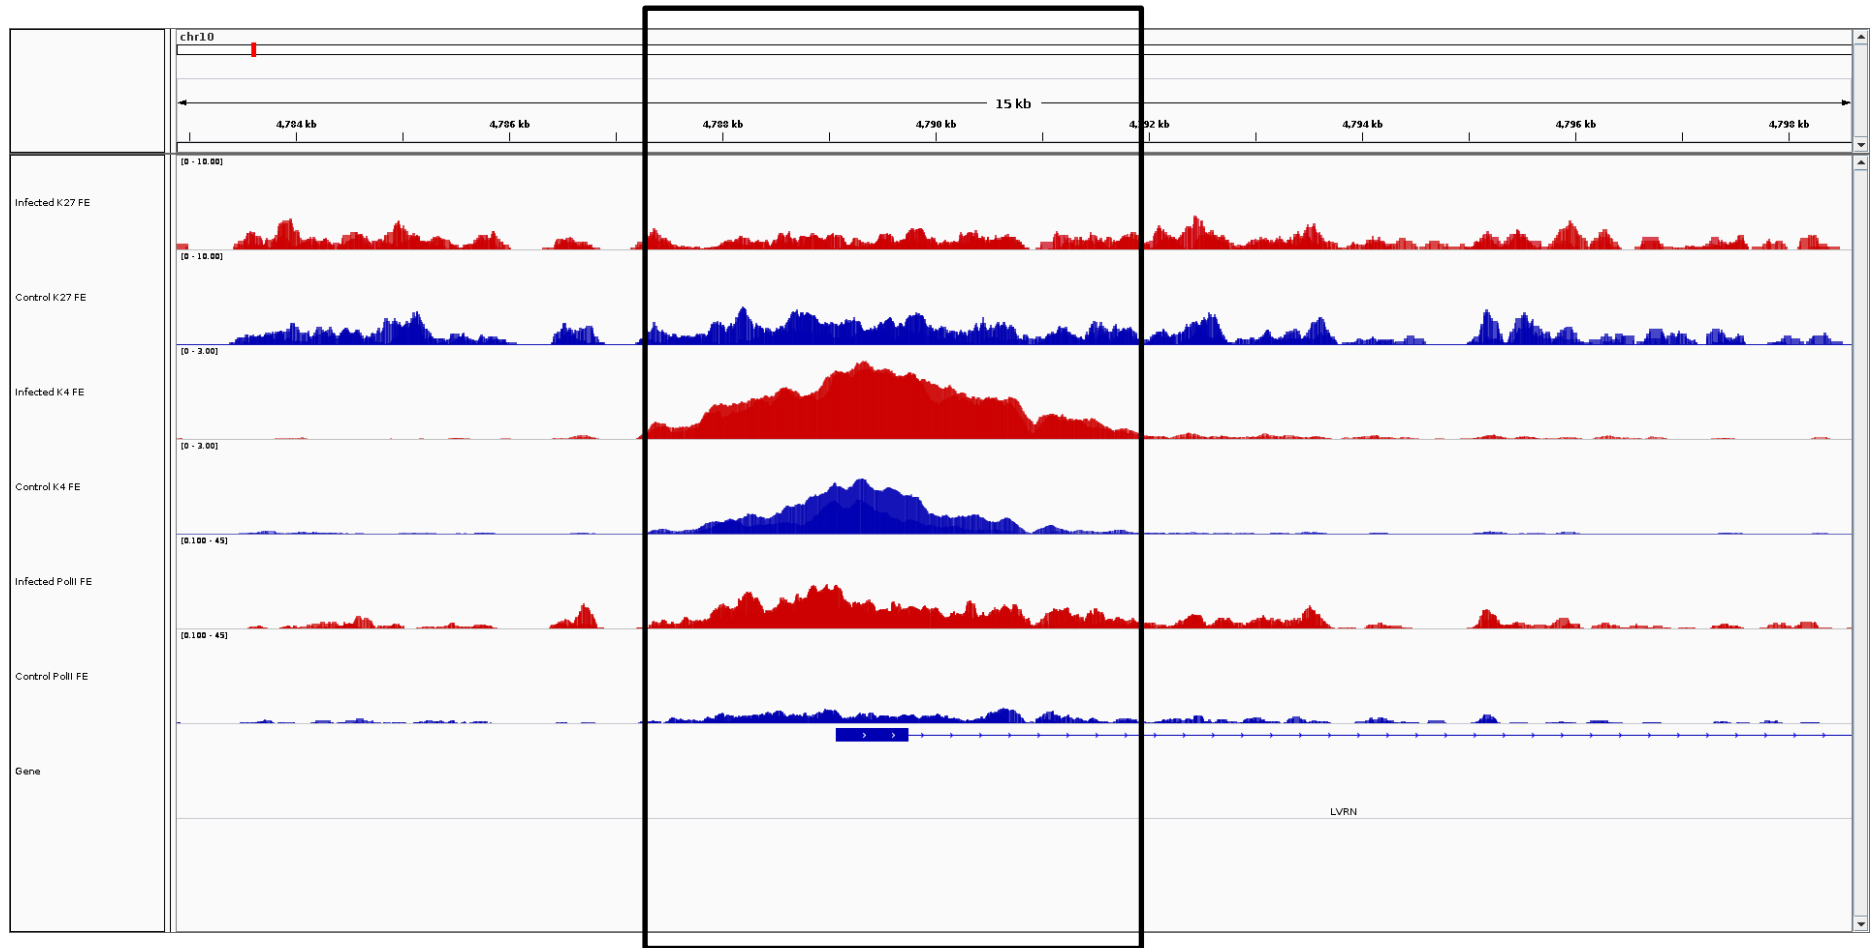

*LVRN*

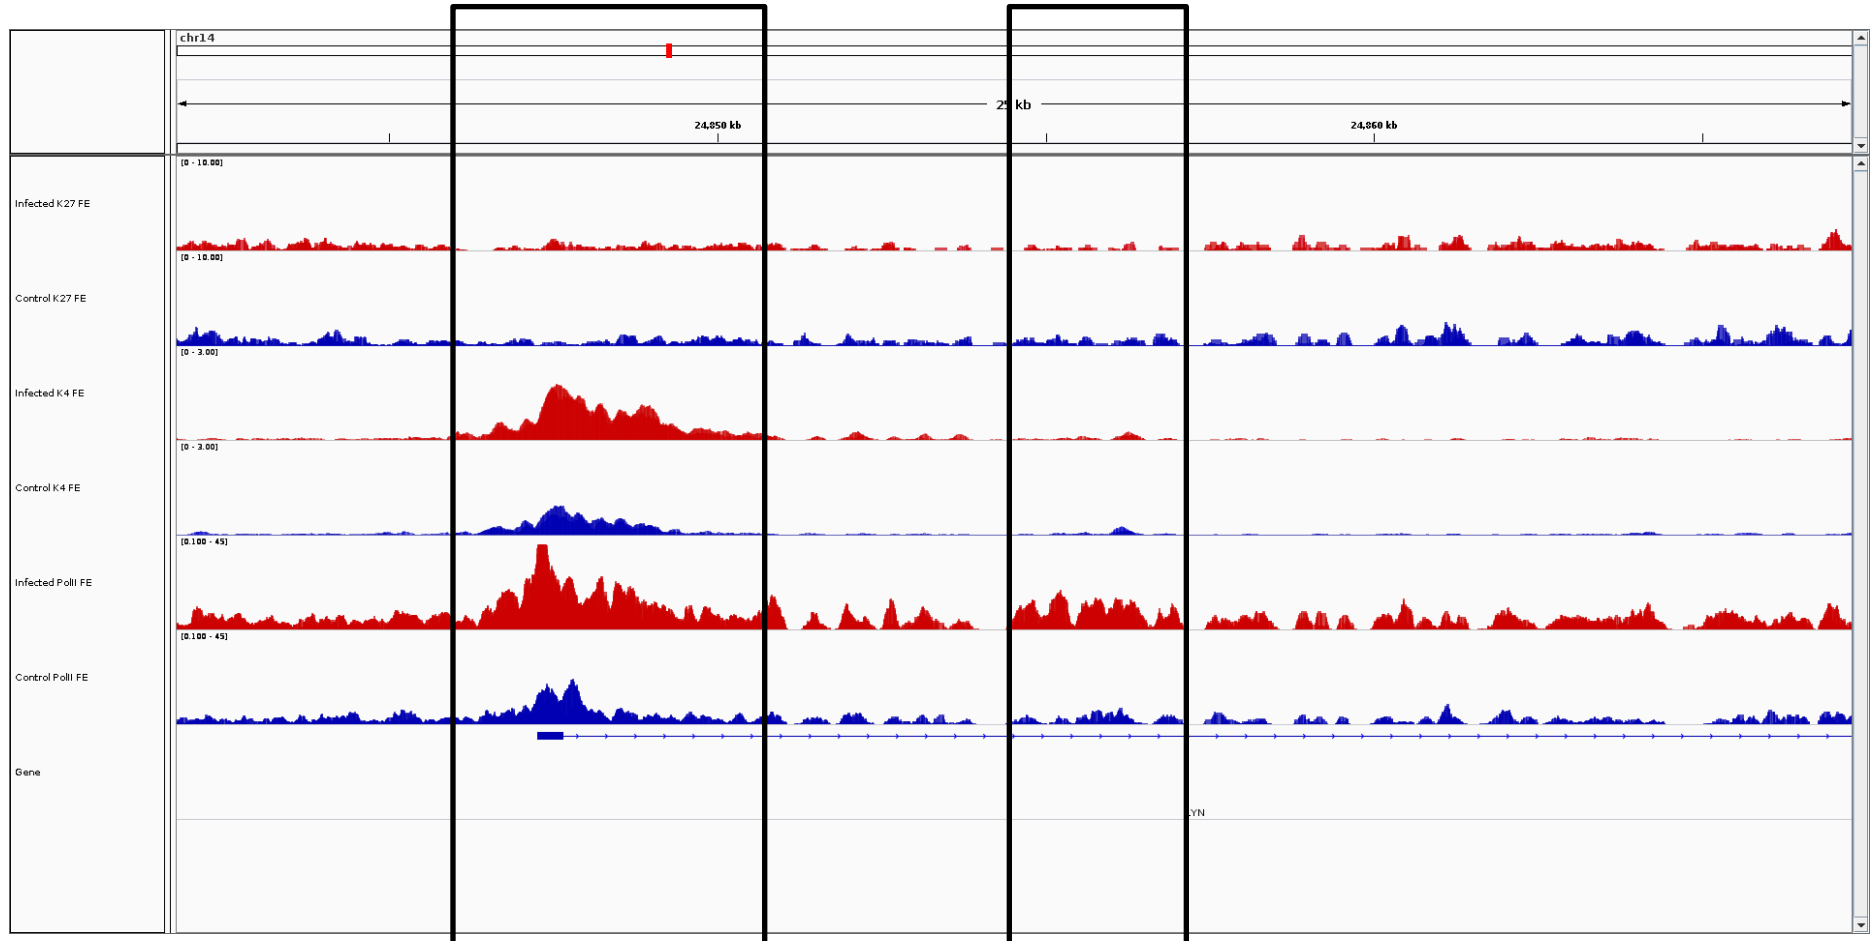

*LYN*

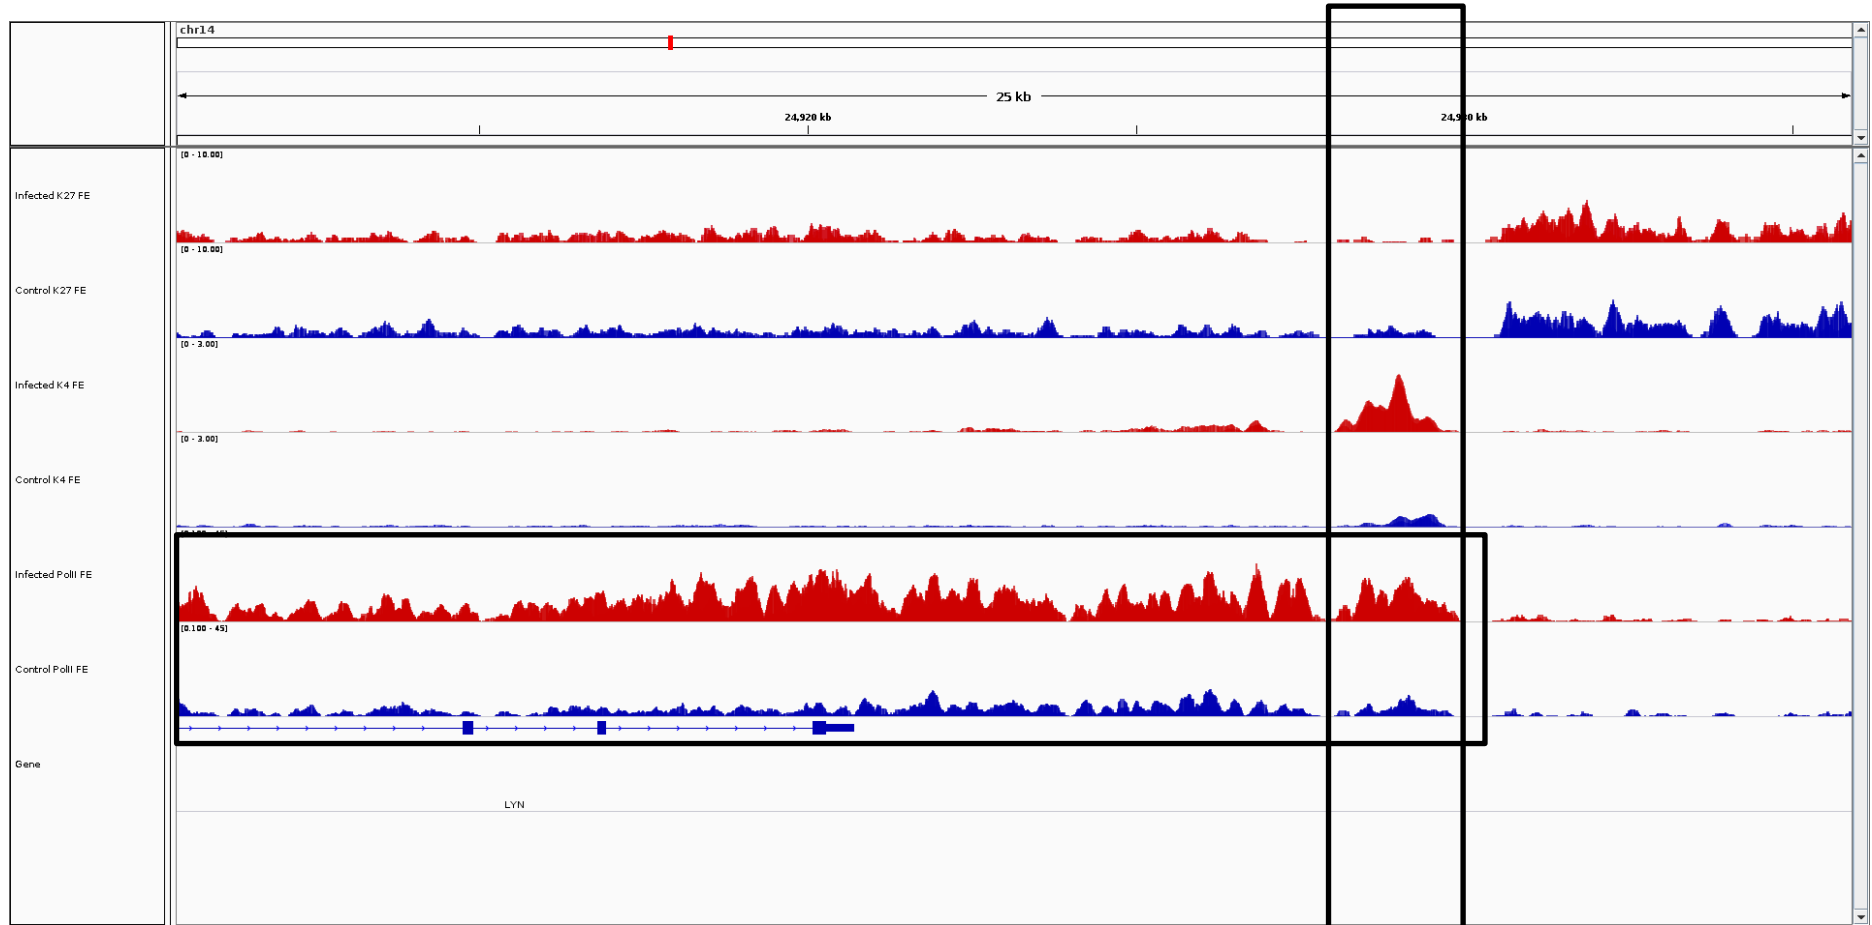

*LYN3*

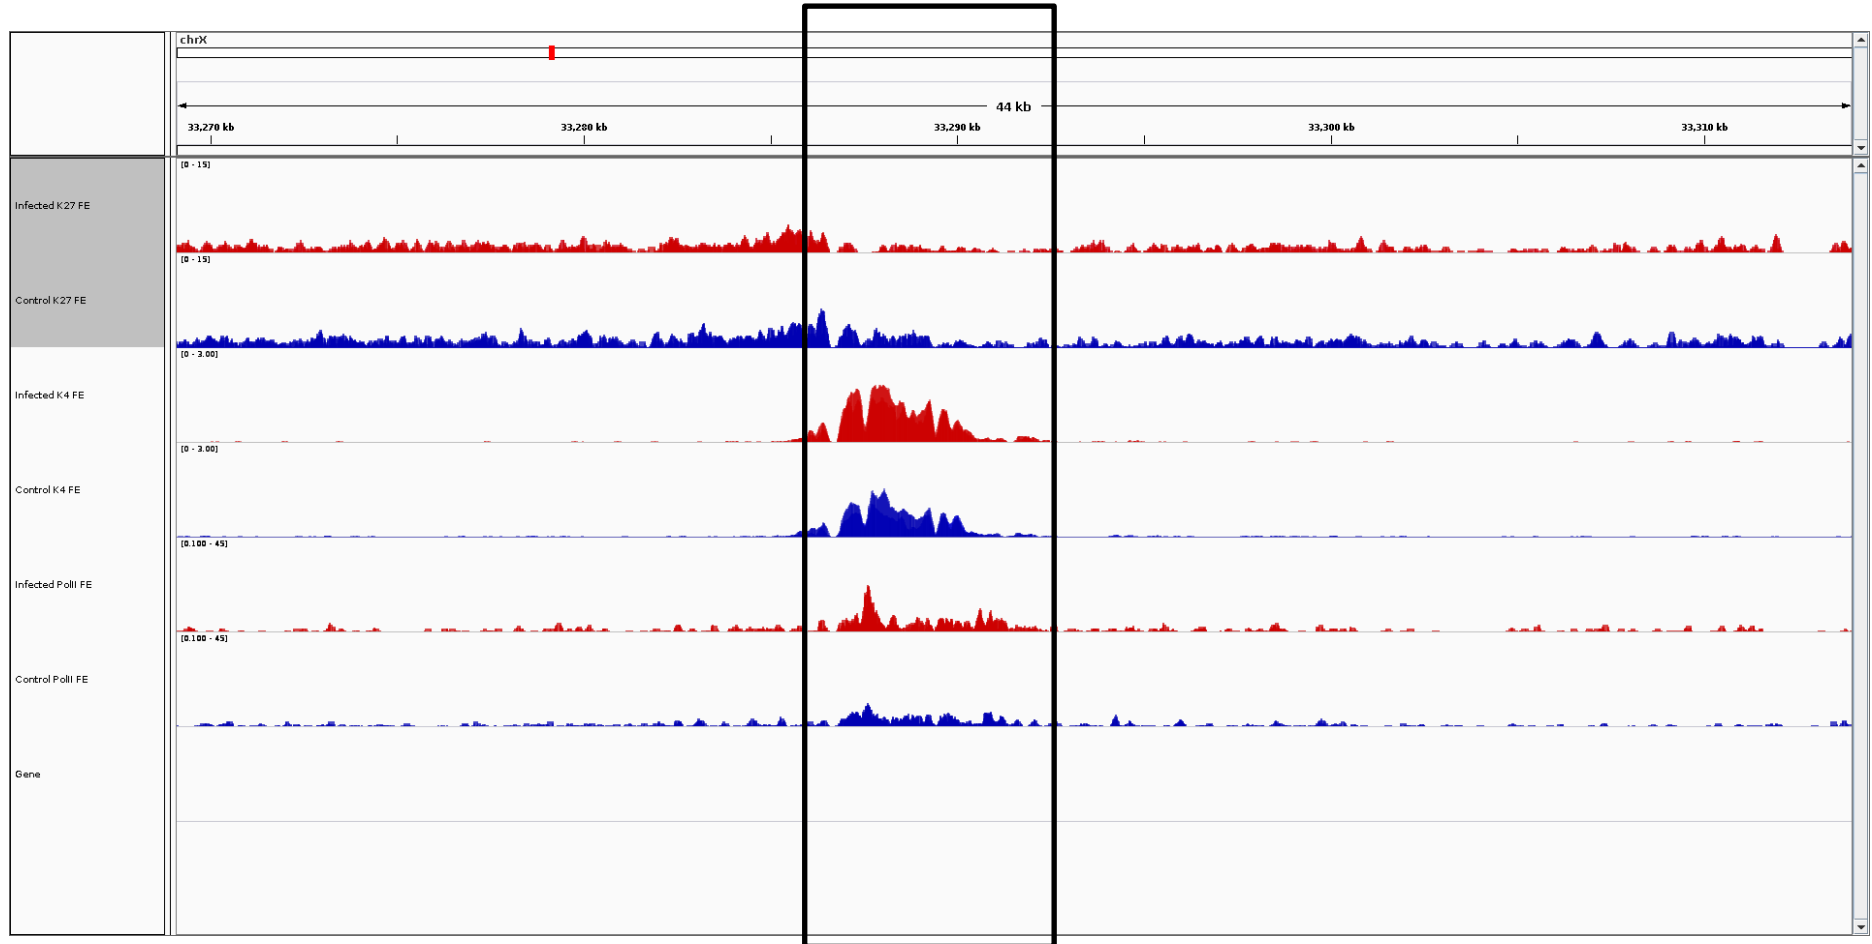

***MAMLD1***

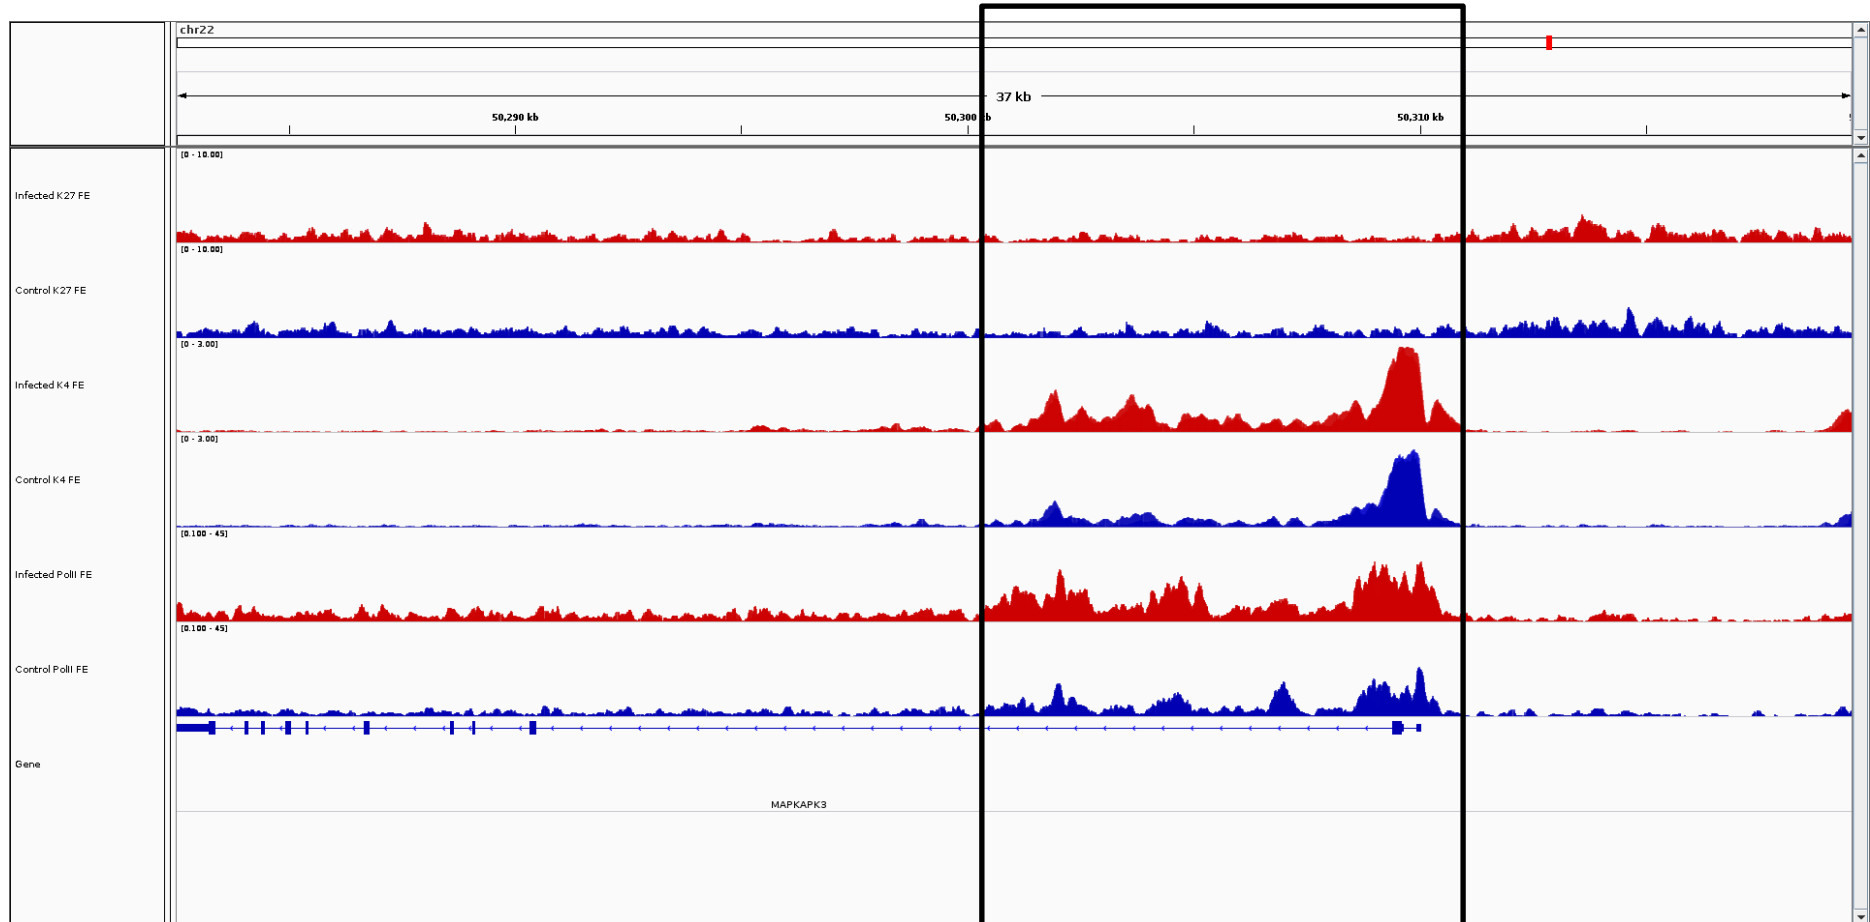

***MAPKAPK3***

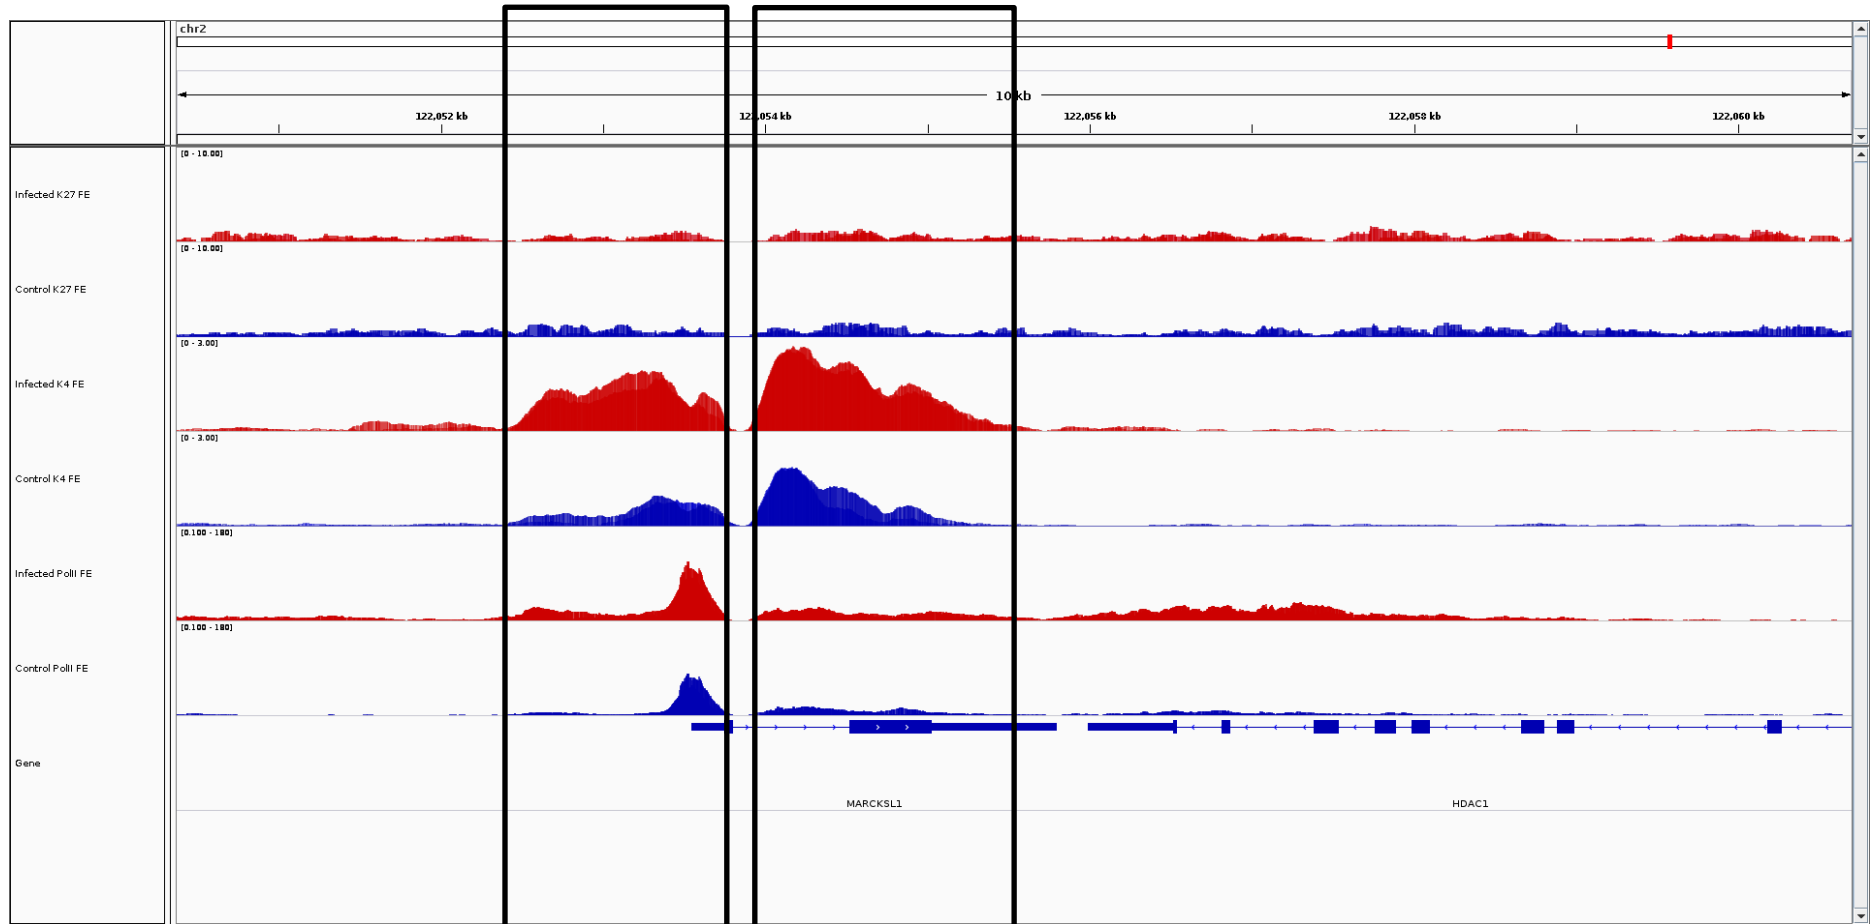

***MARCKSL1***

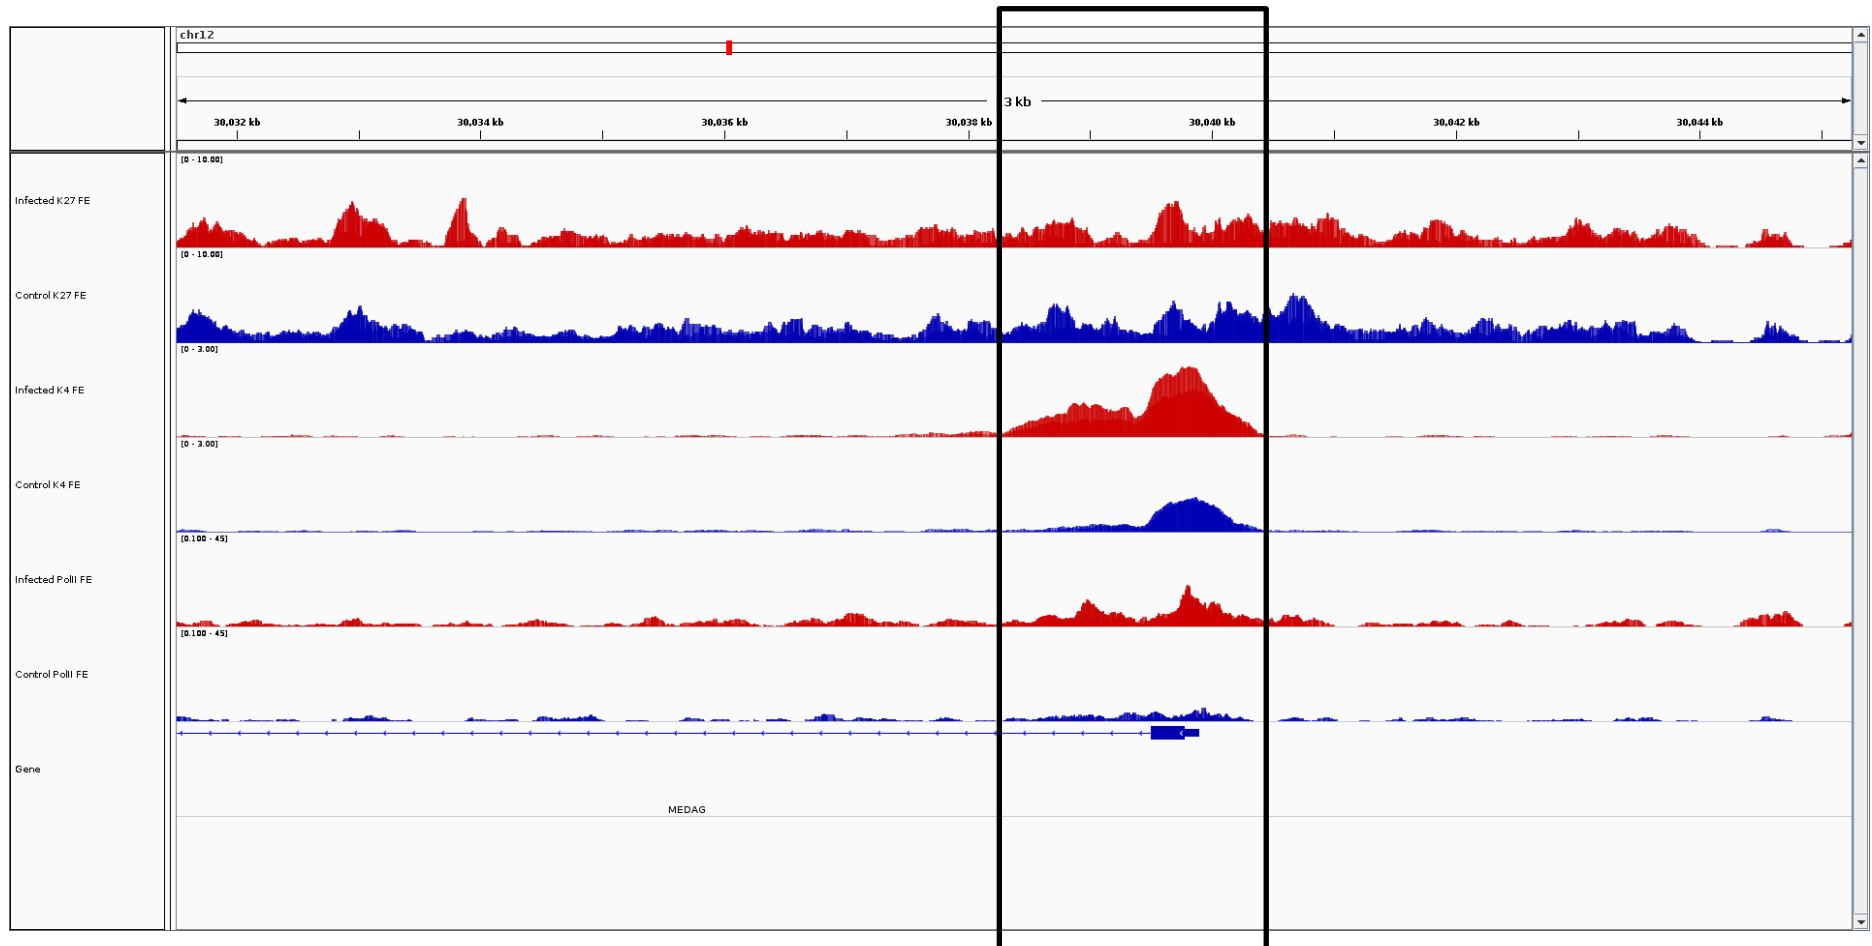

**MEDAG**

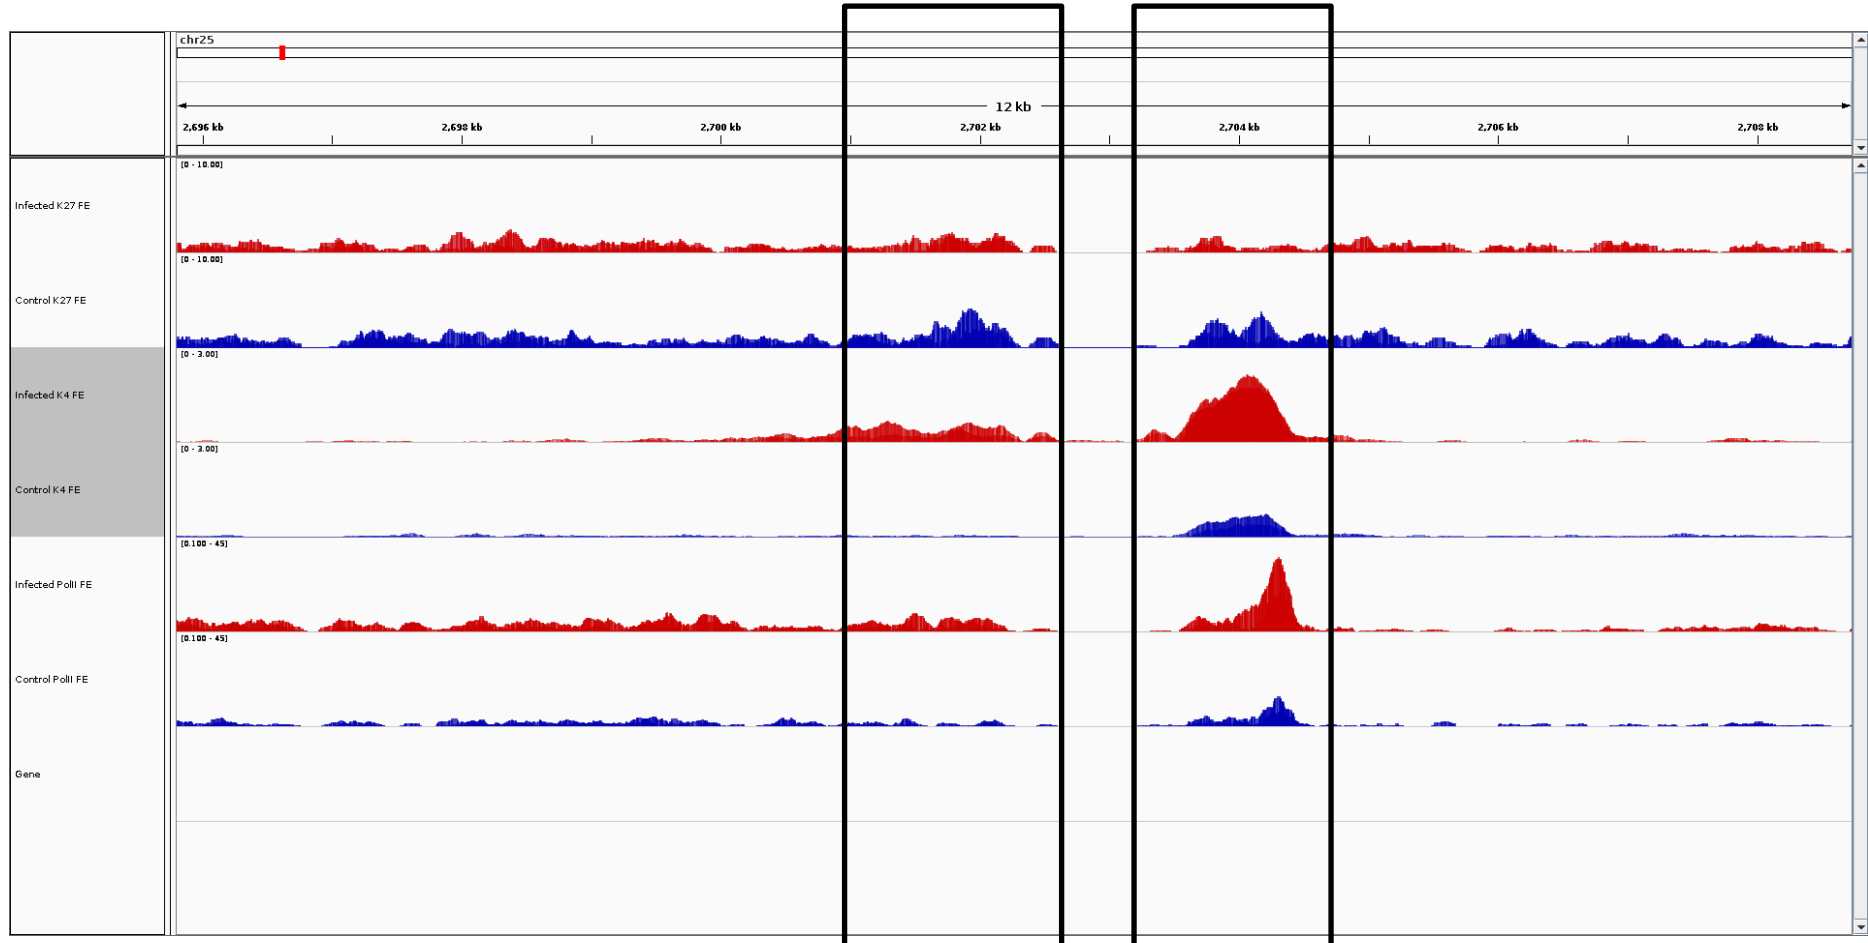

***MEFV***



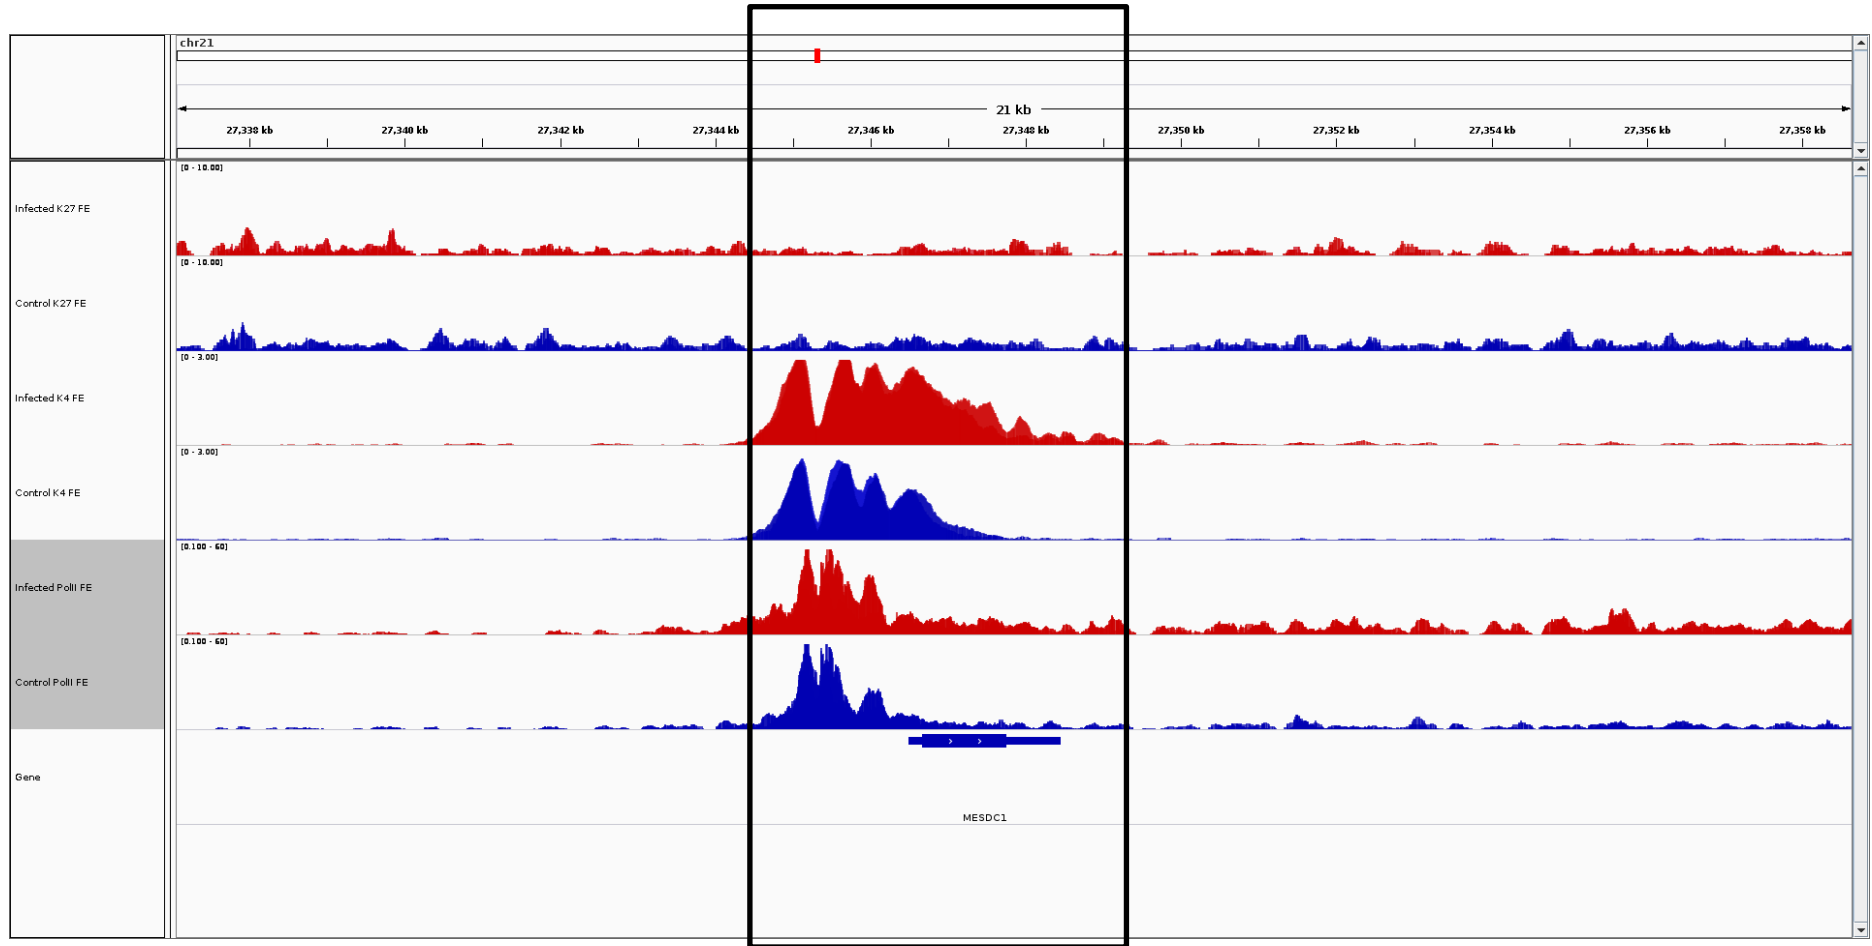

**MESDC1**

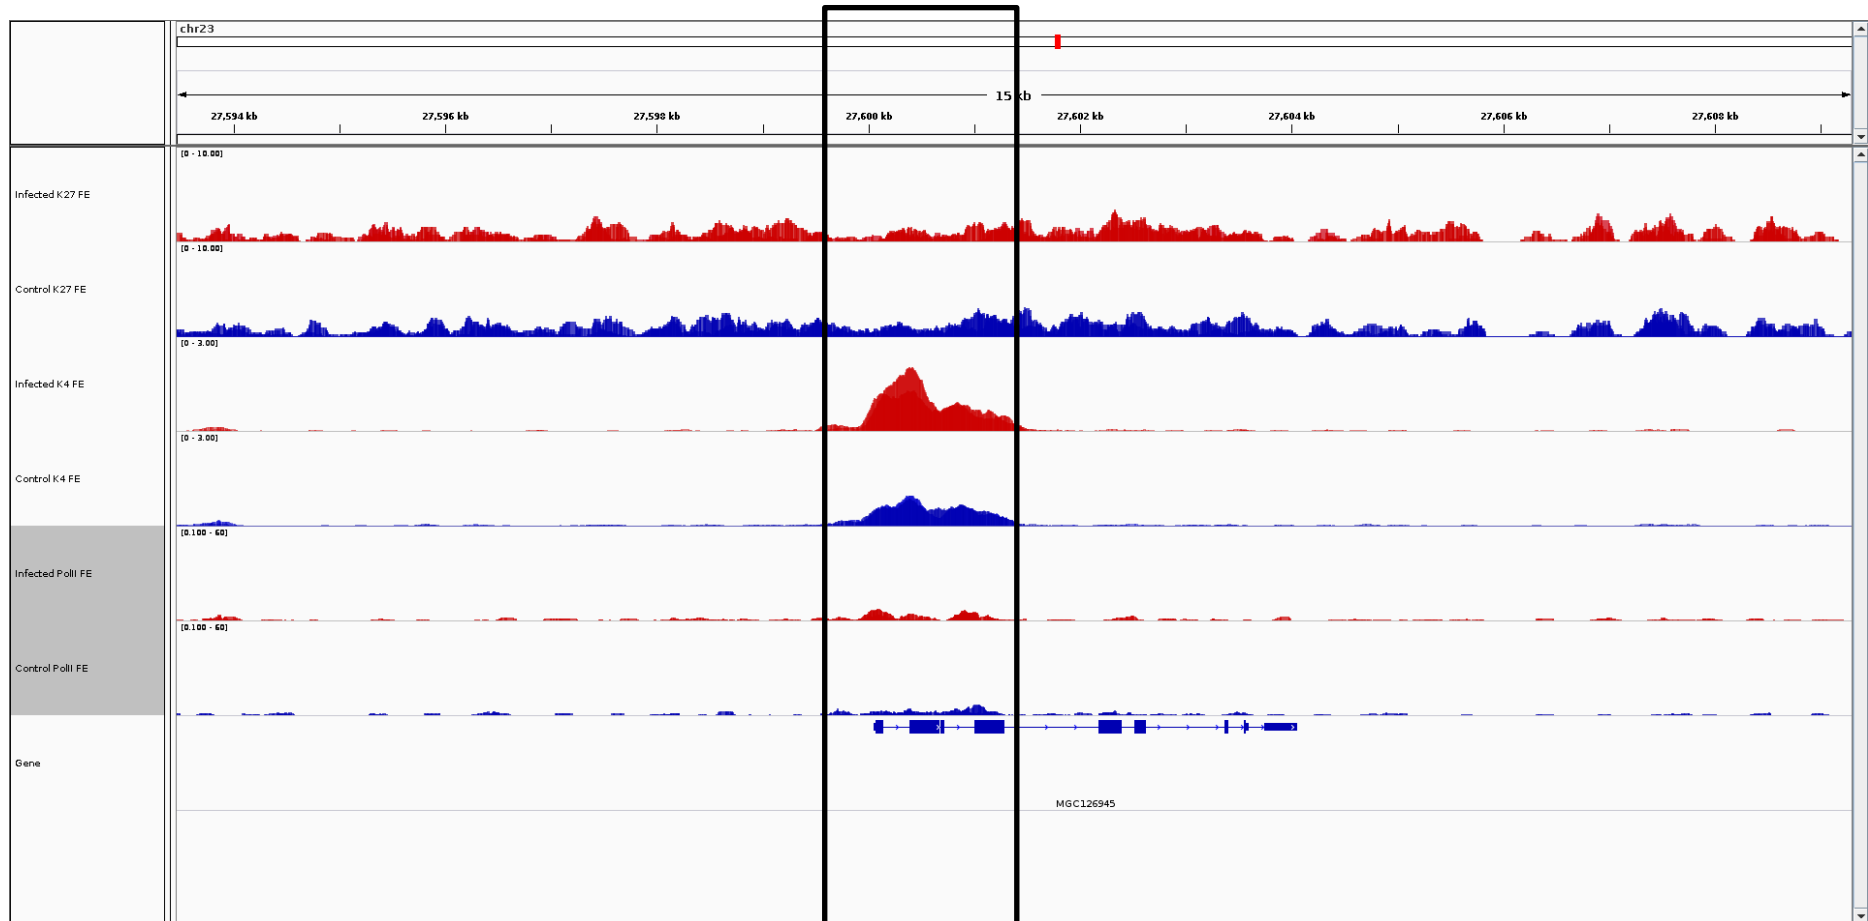

***MGC126945***

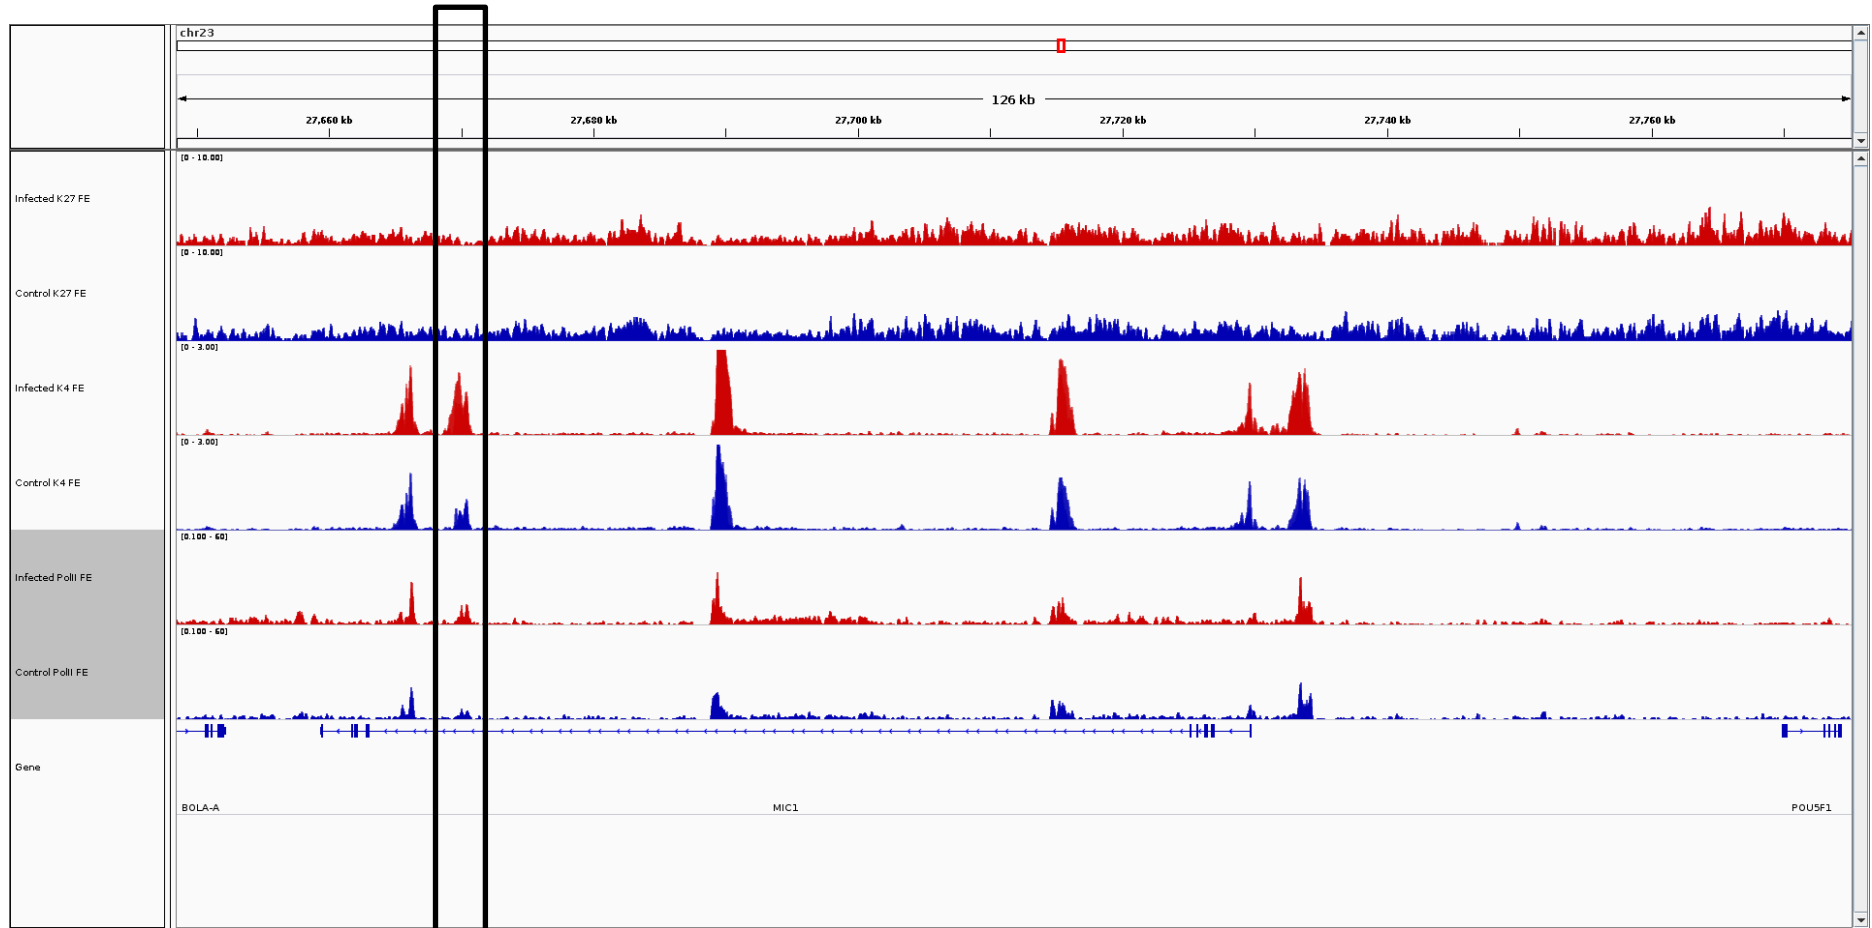

*MIC1*

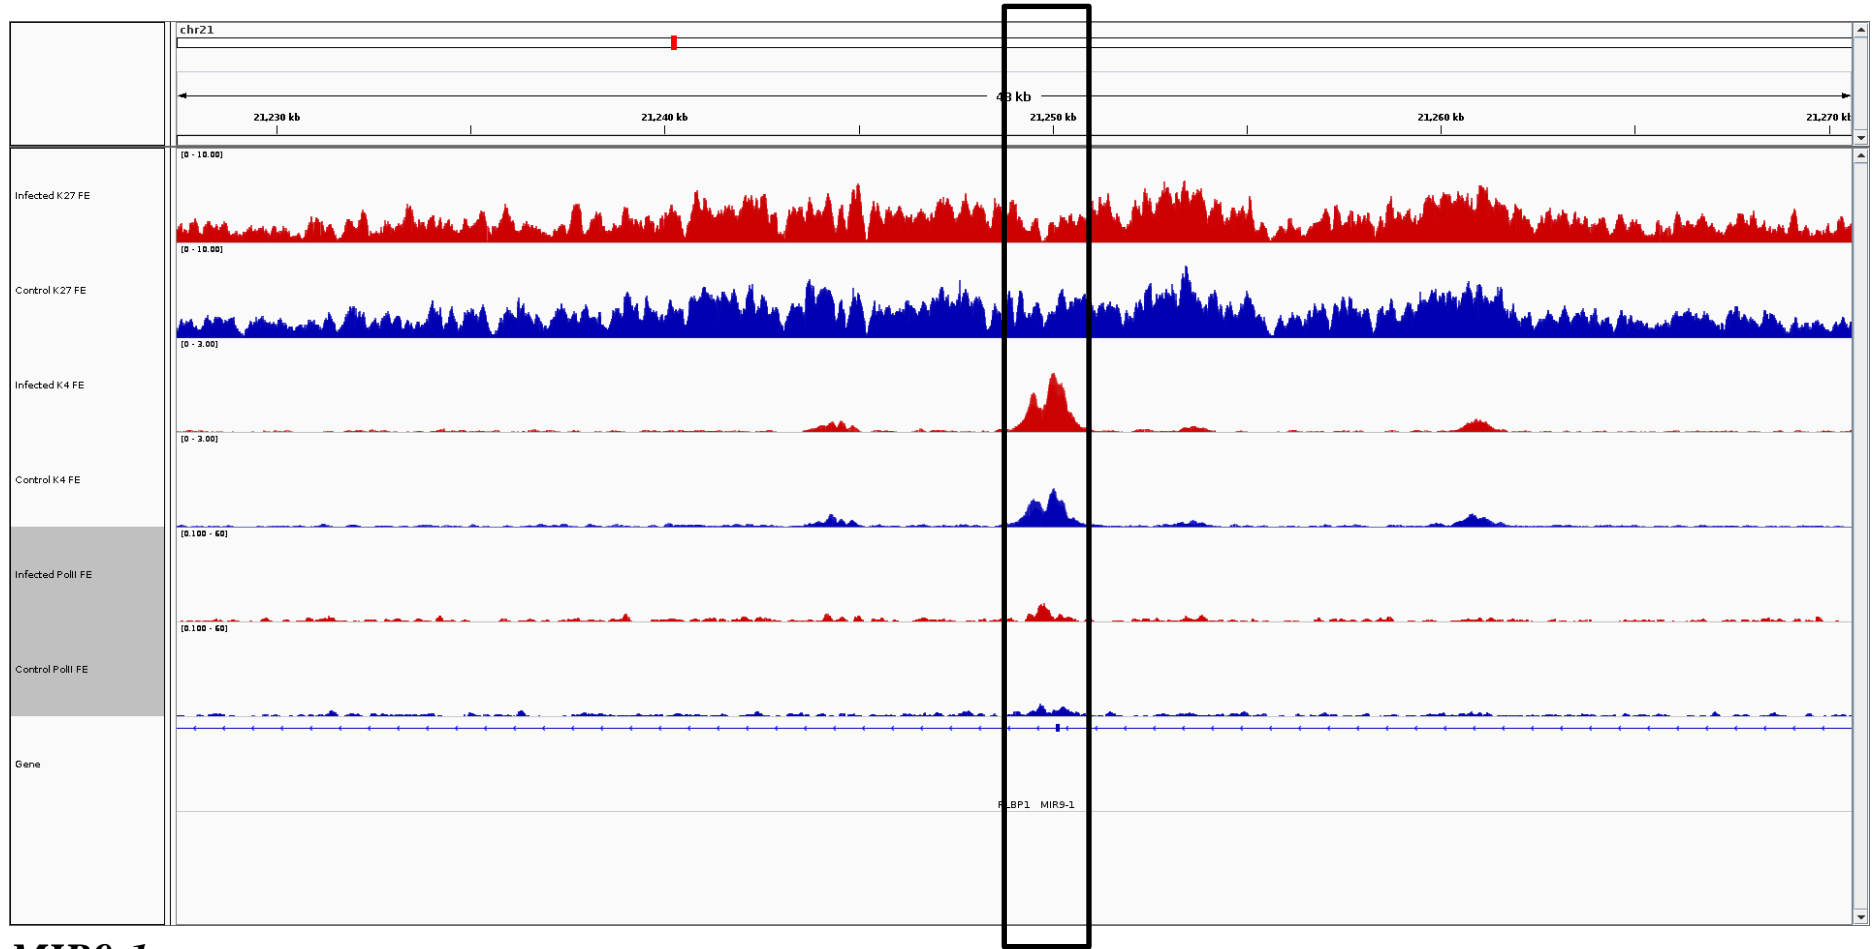

***MIR9-1***

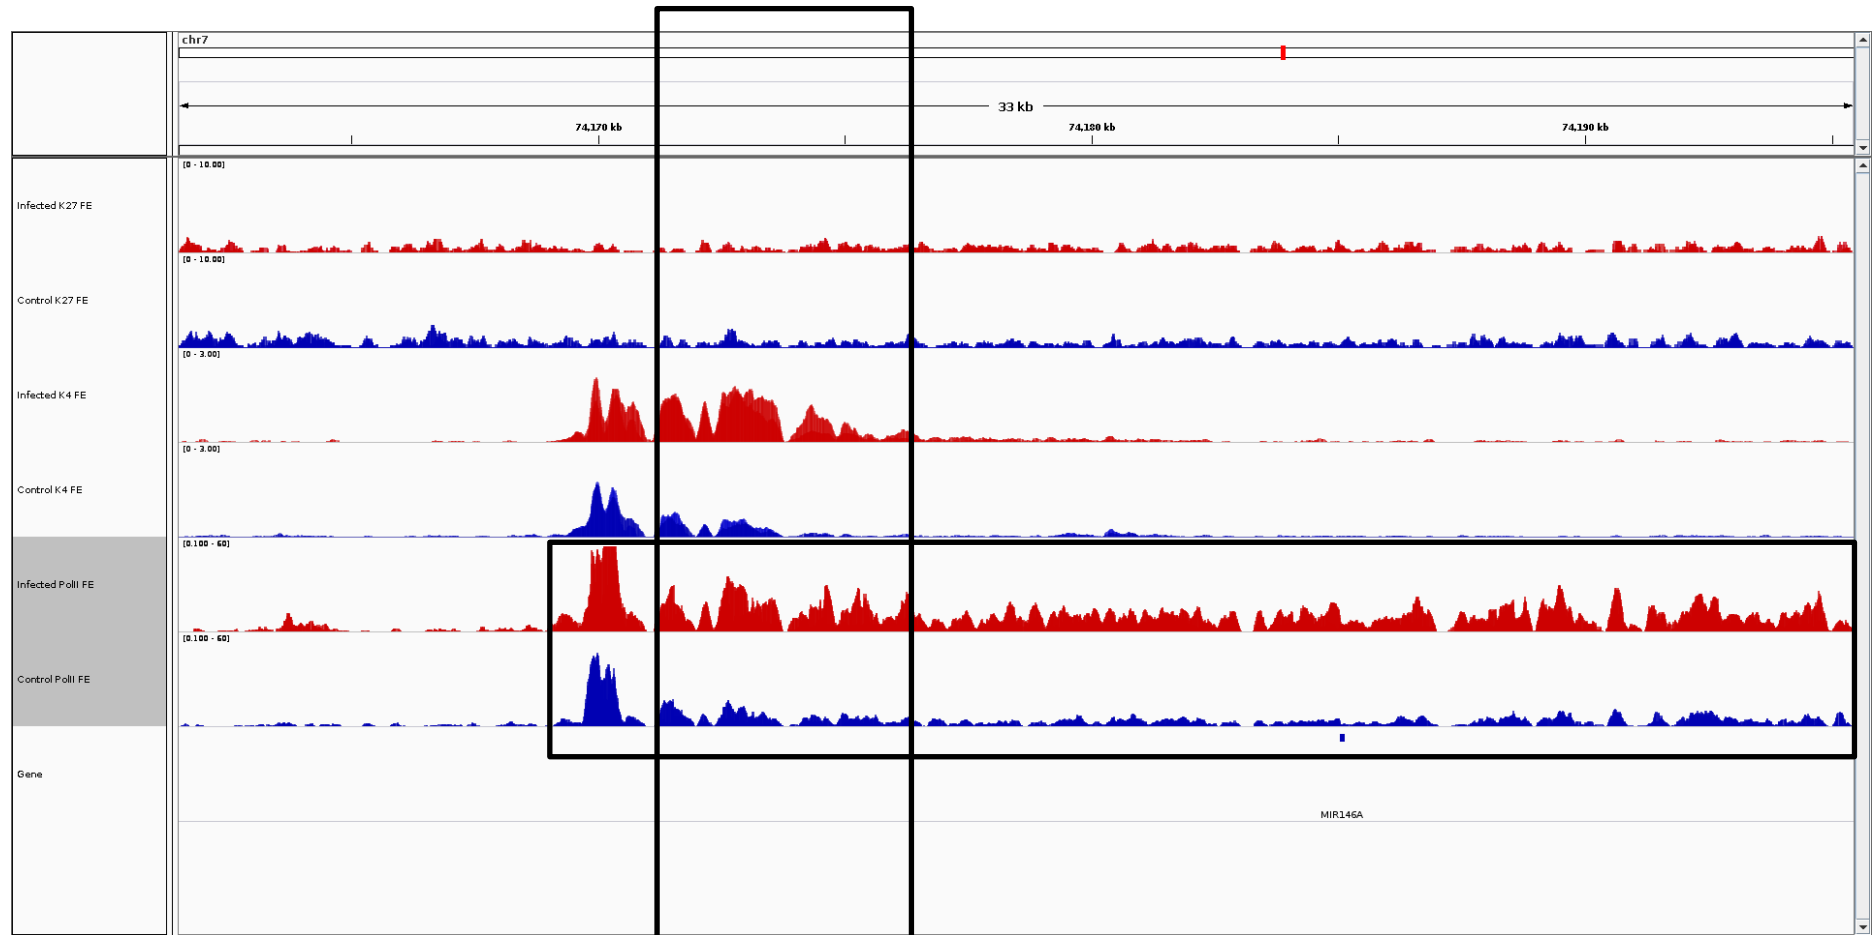

***MIR146A***

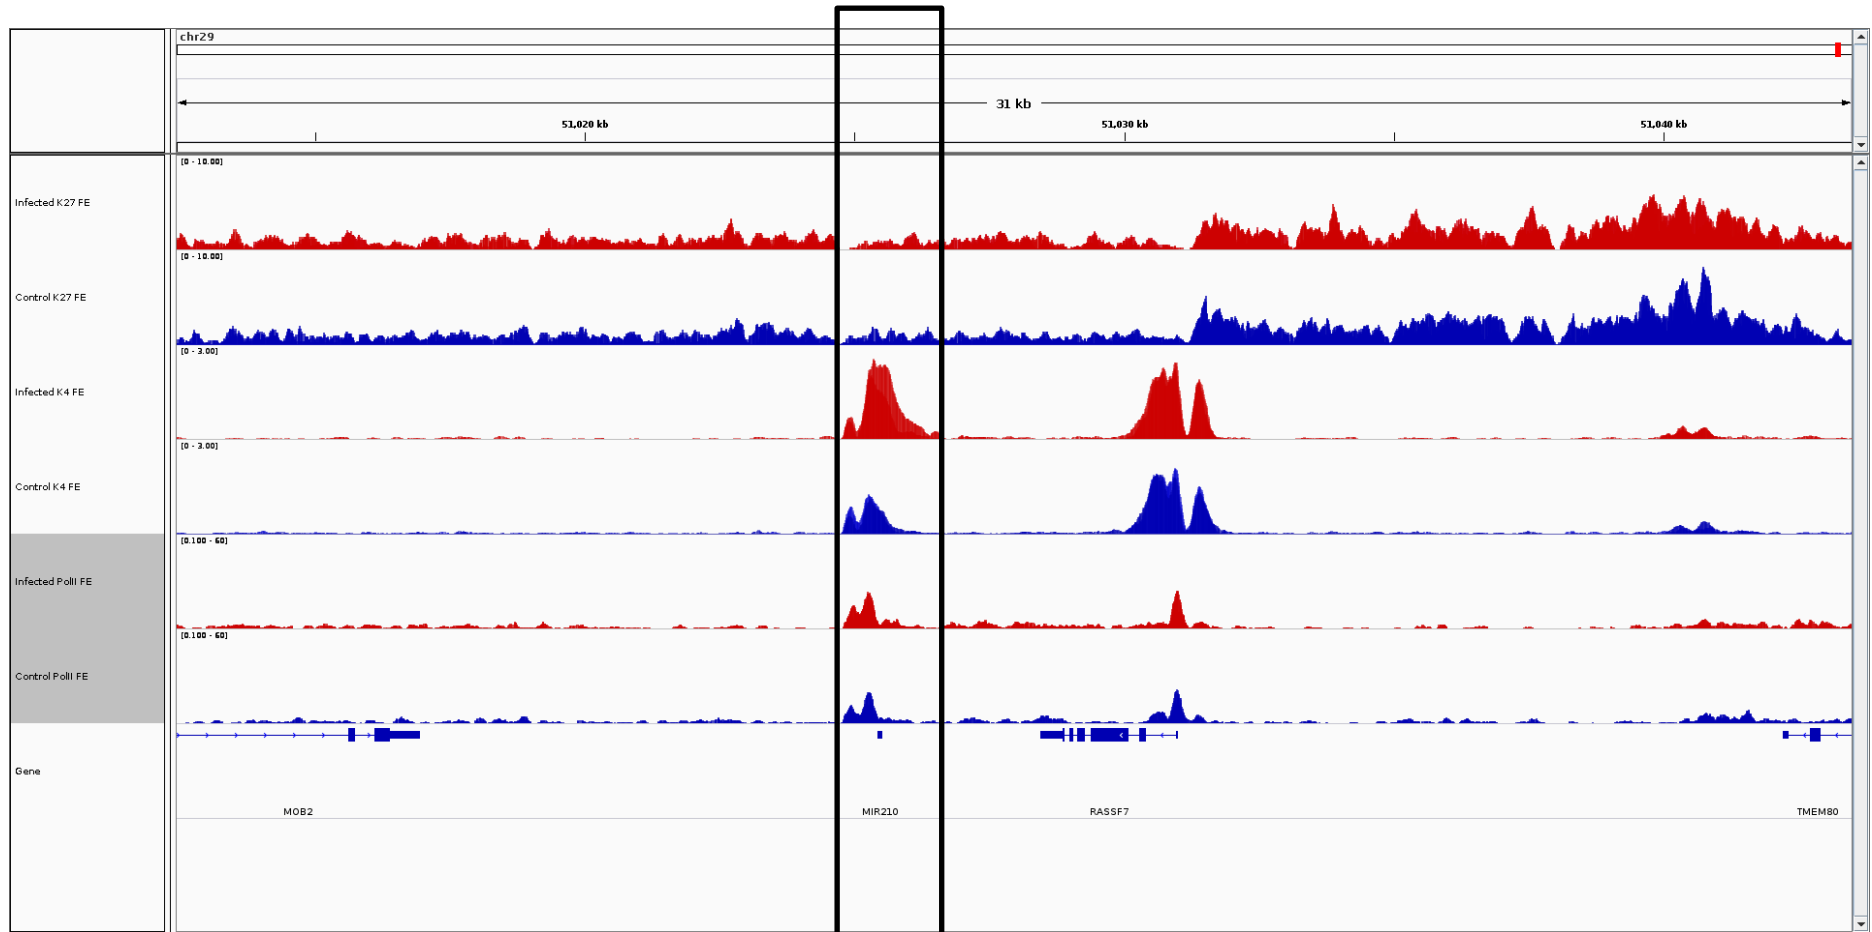

**MIR210**

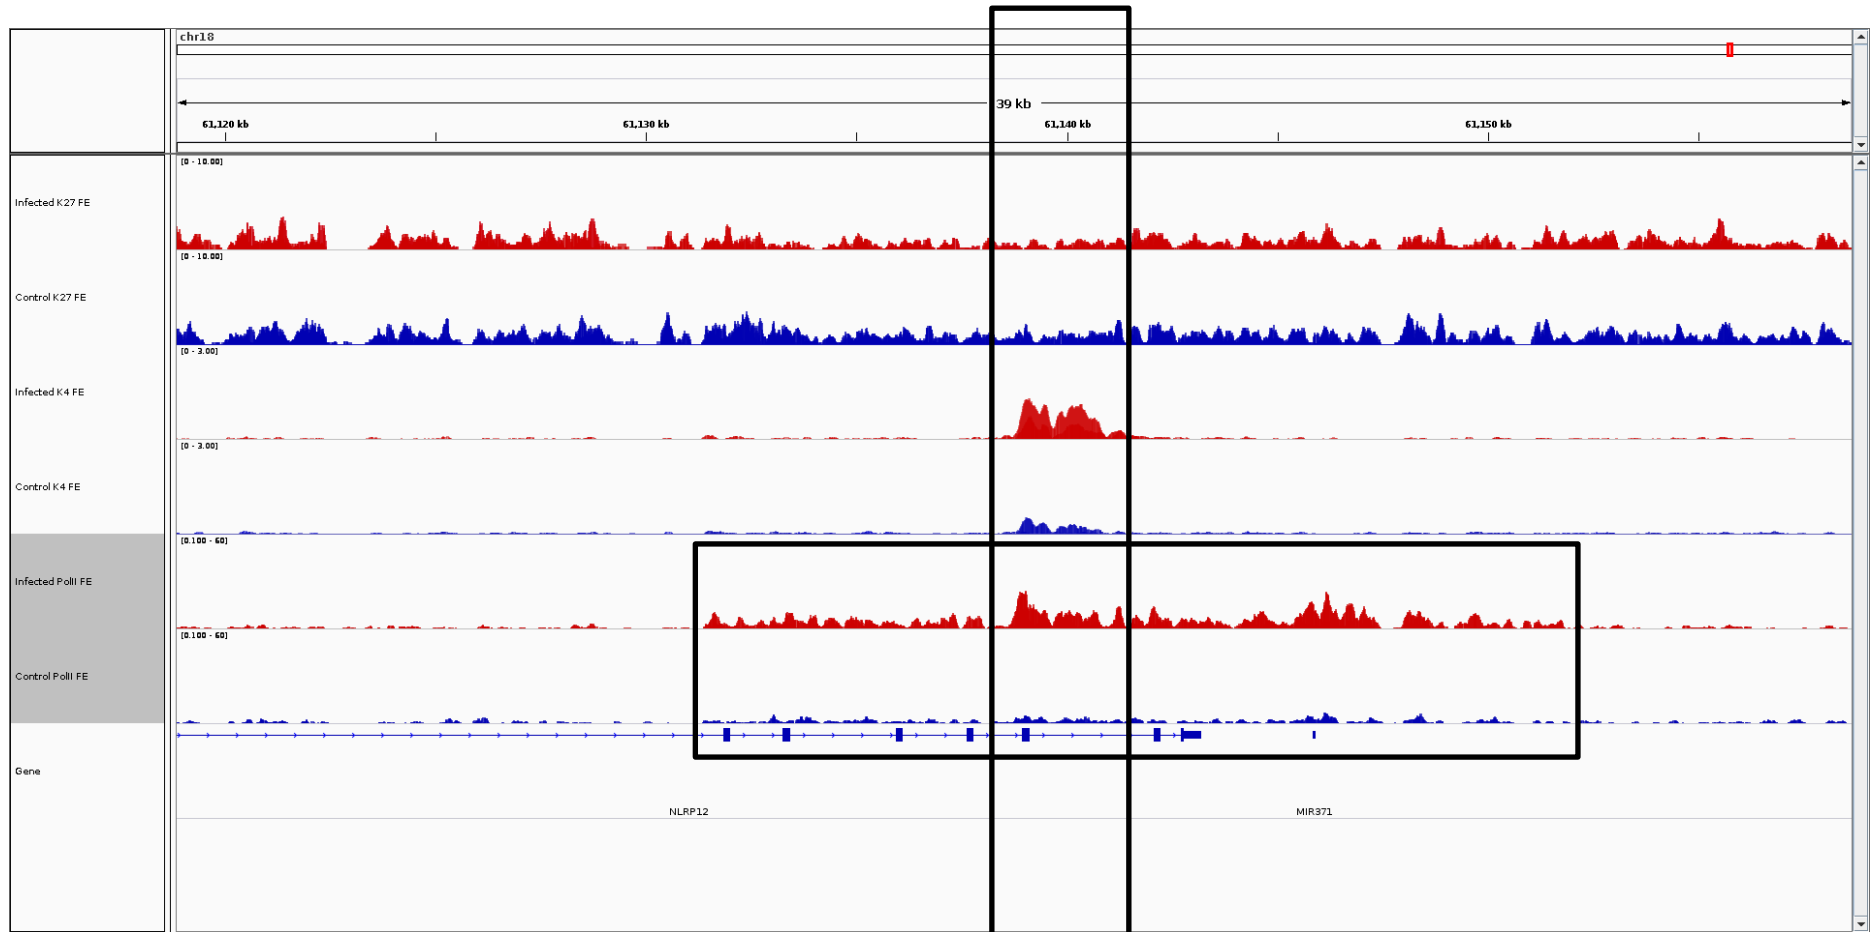

***MIR371***

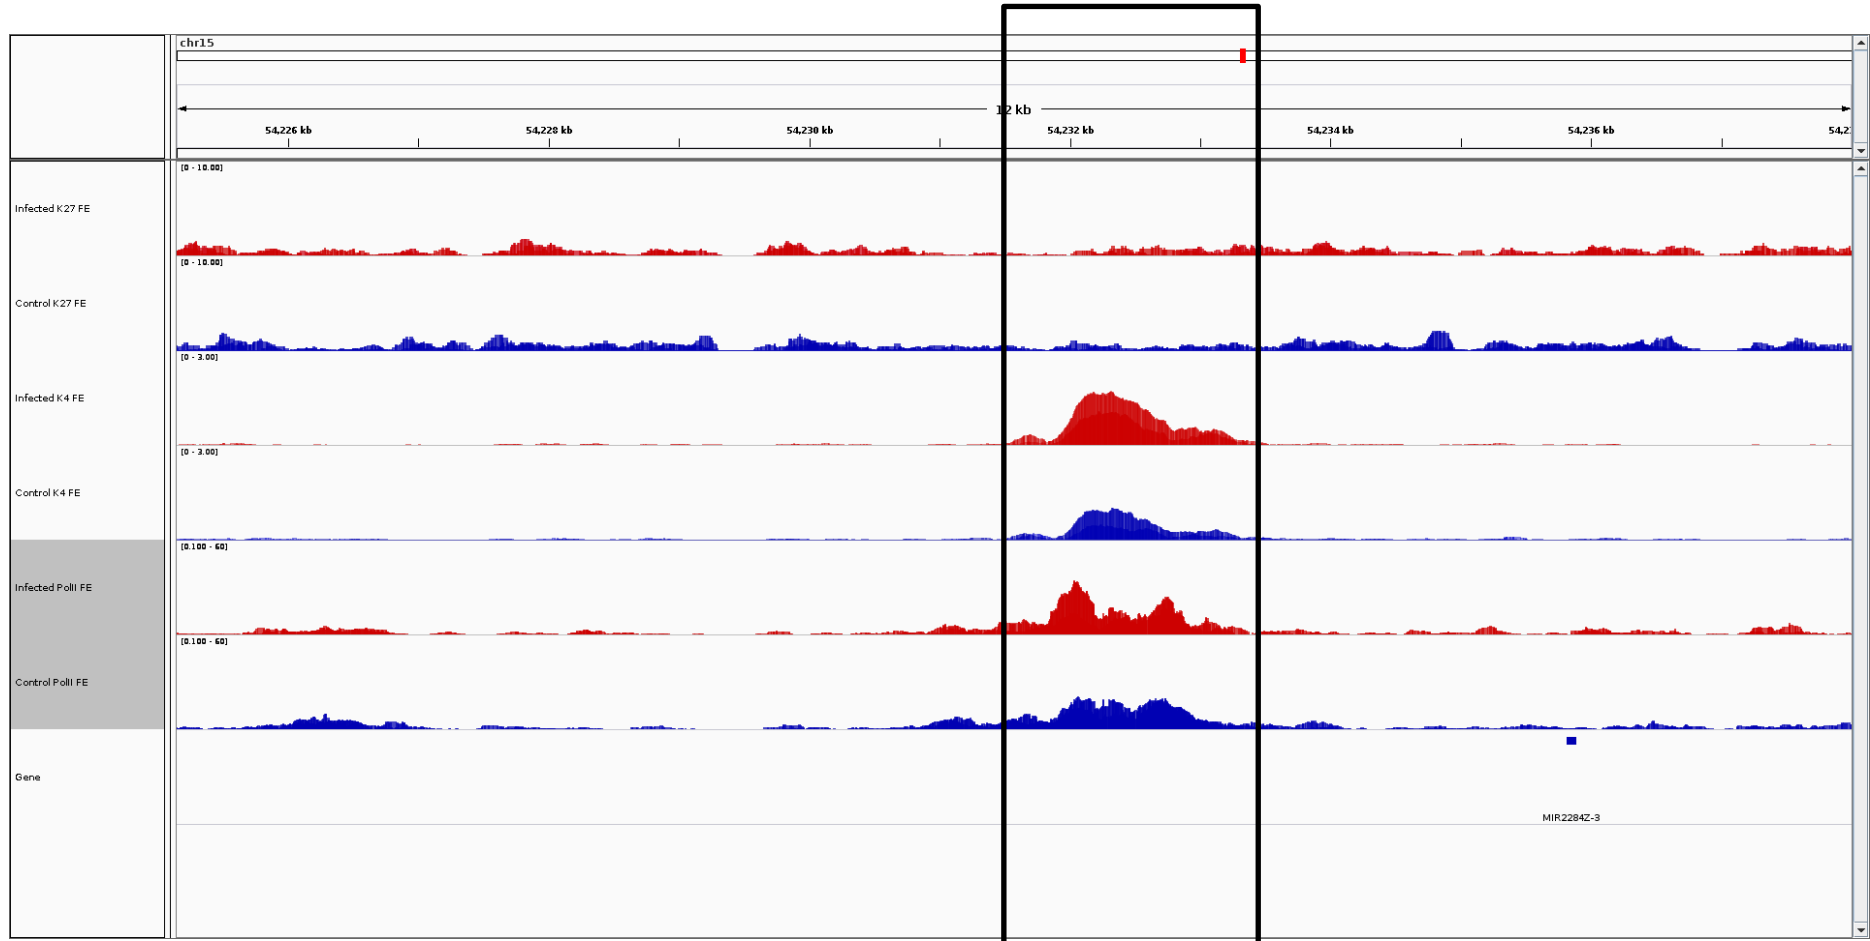

***MIR2284Z-3***



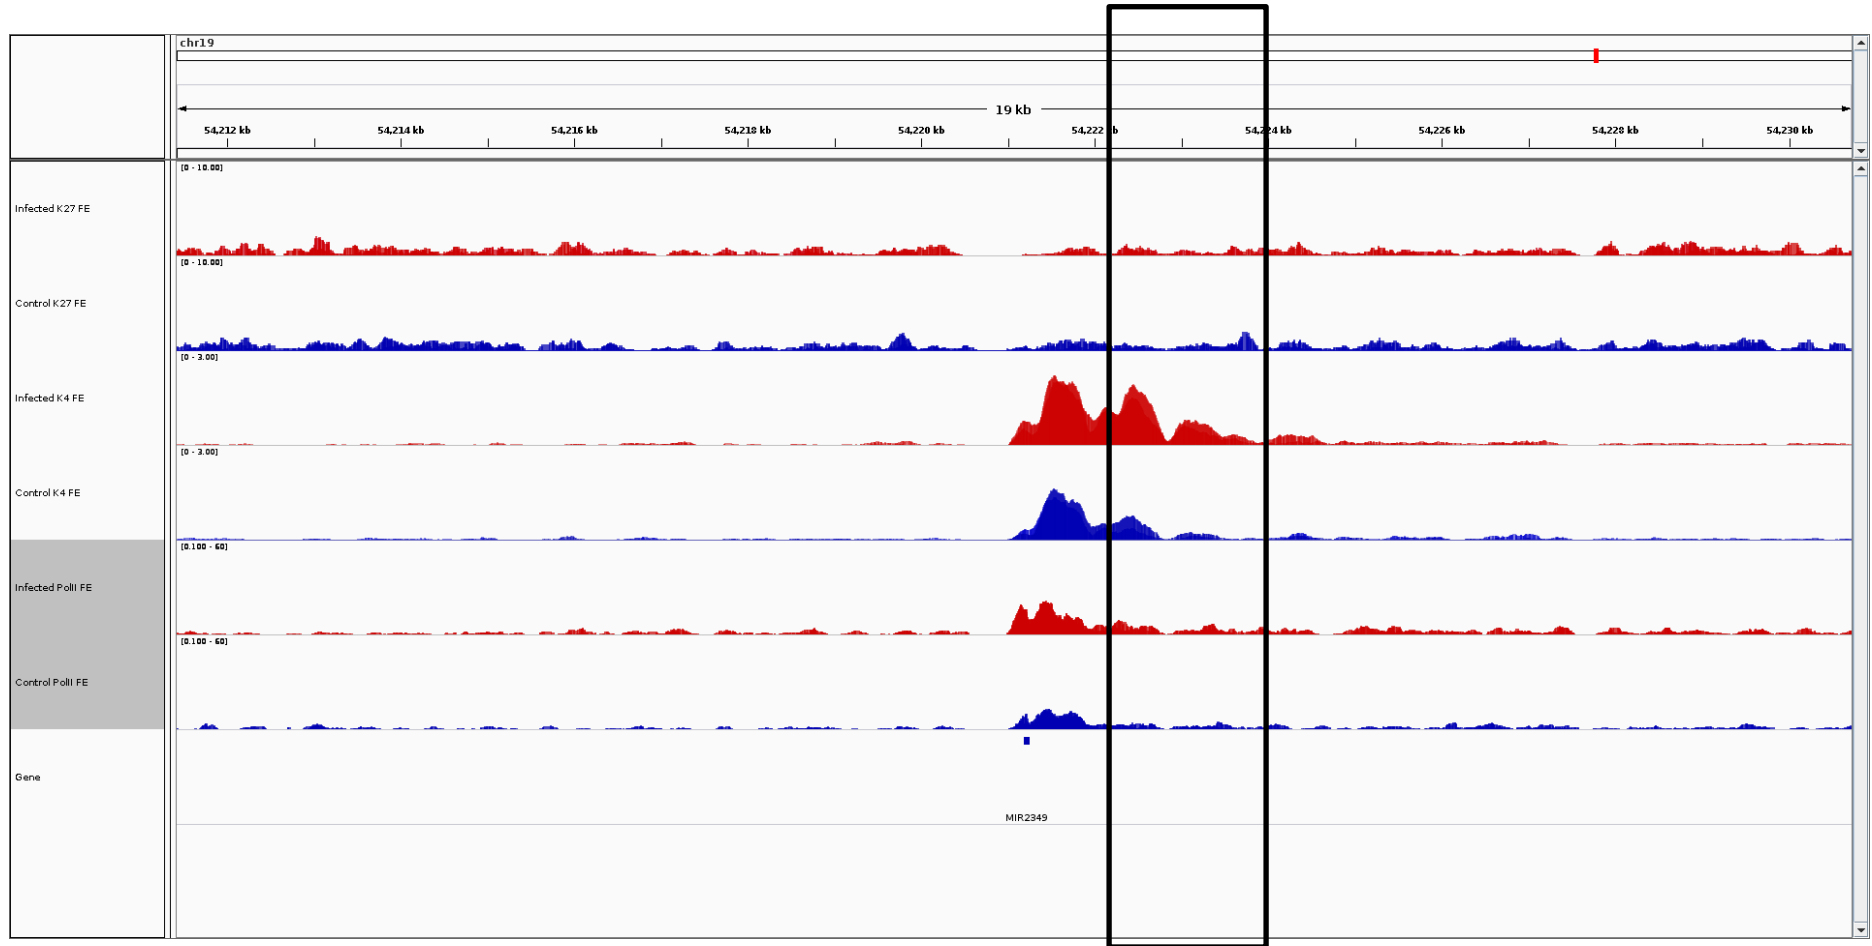

**MIR2349**

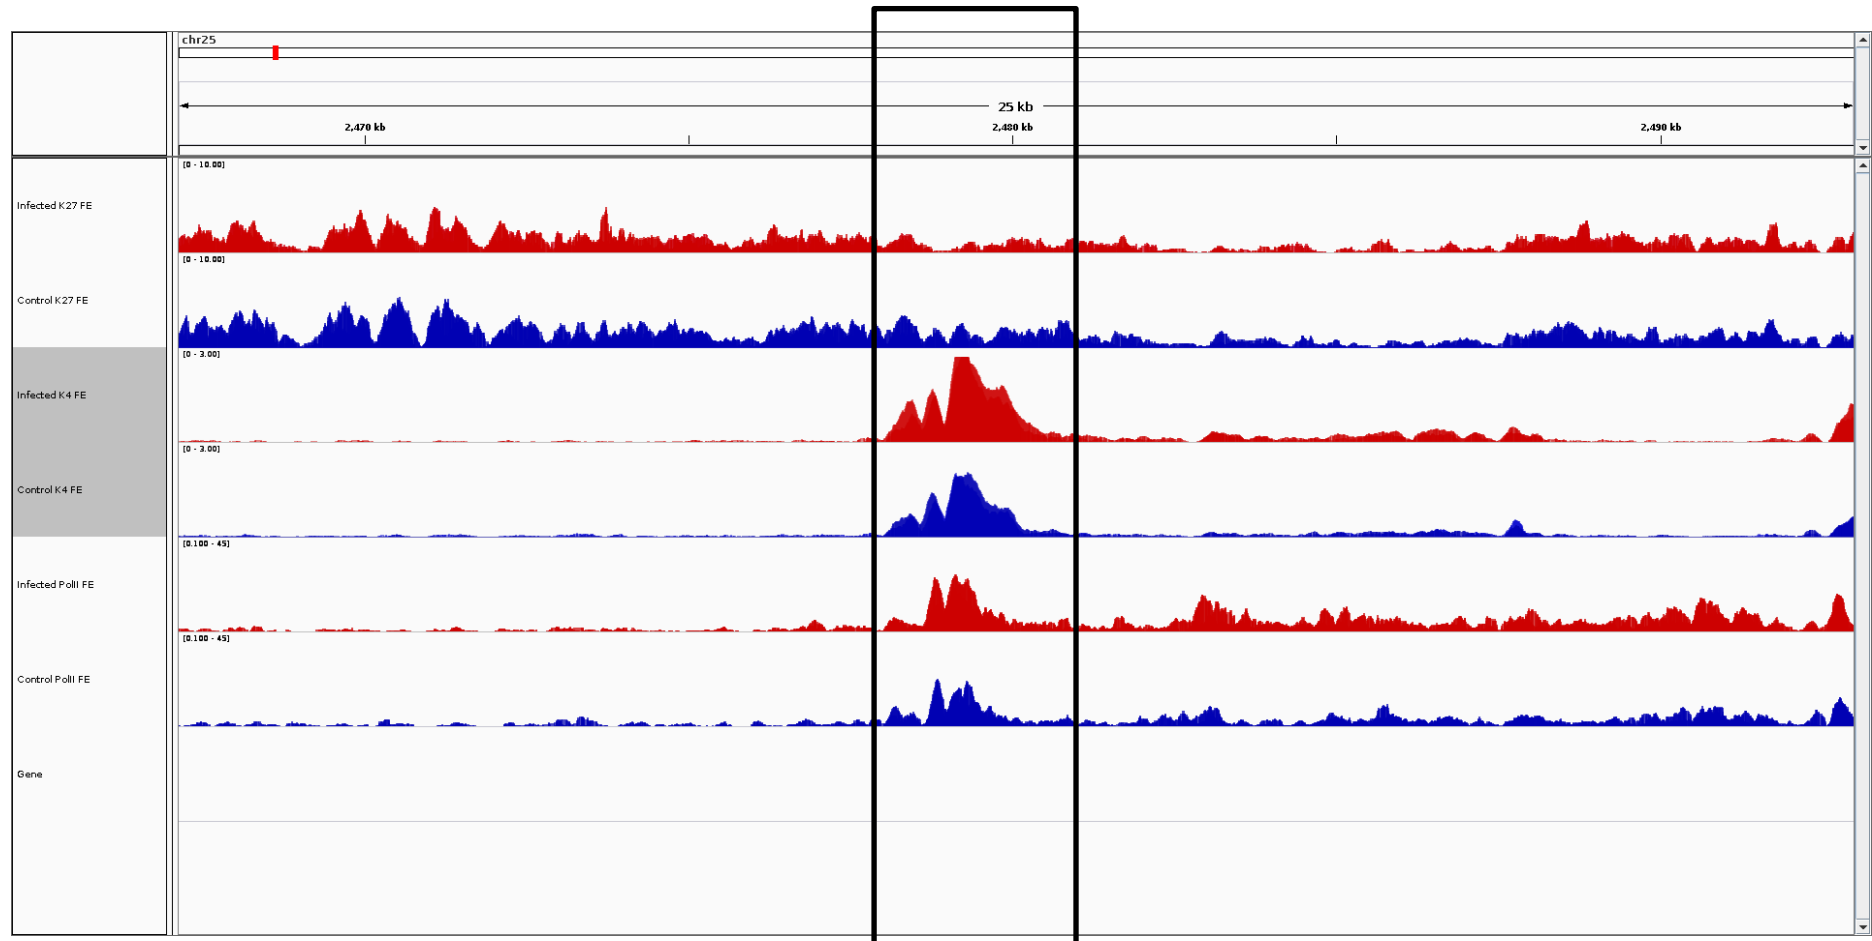

***MMP25***

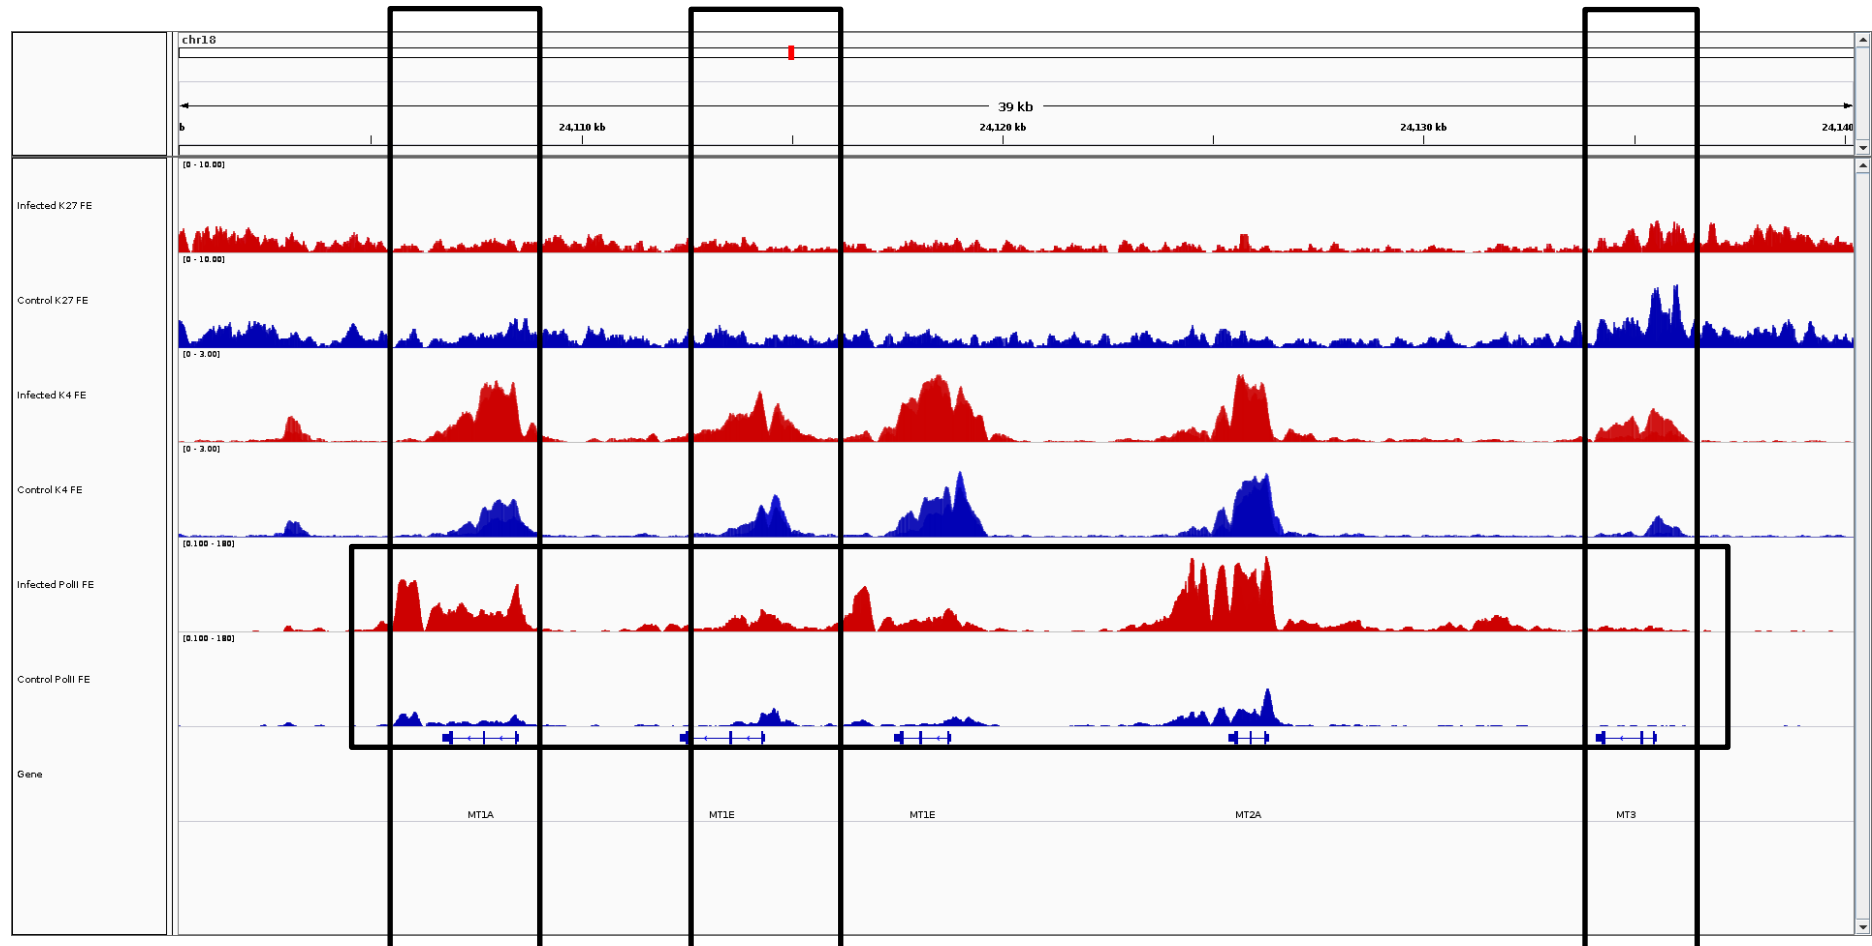

***MT1, MT2, MT3***

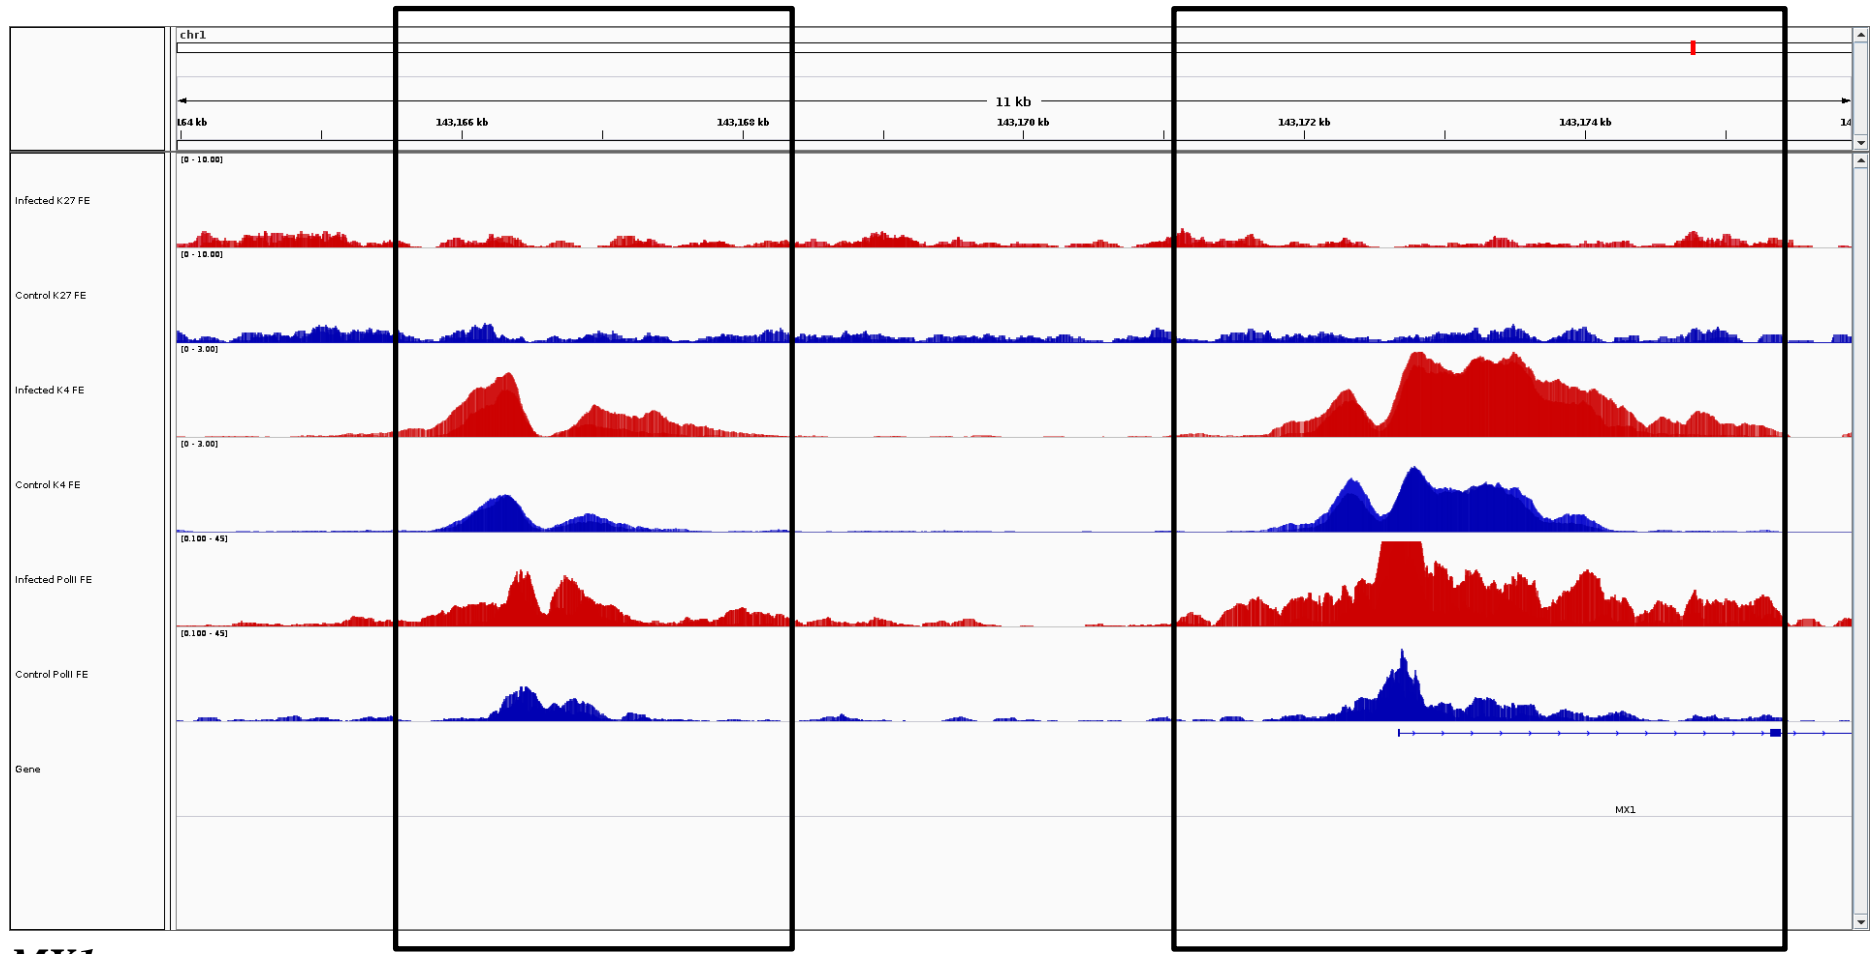

***MX1***

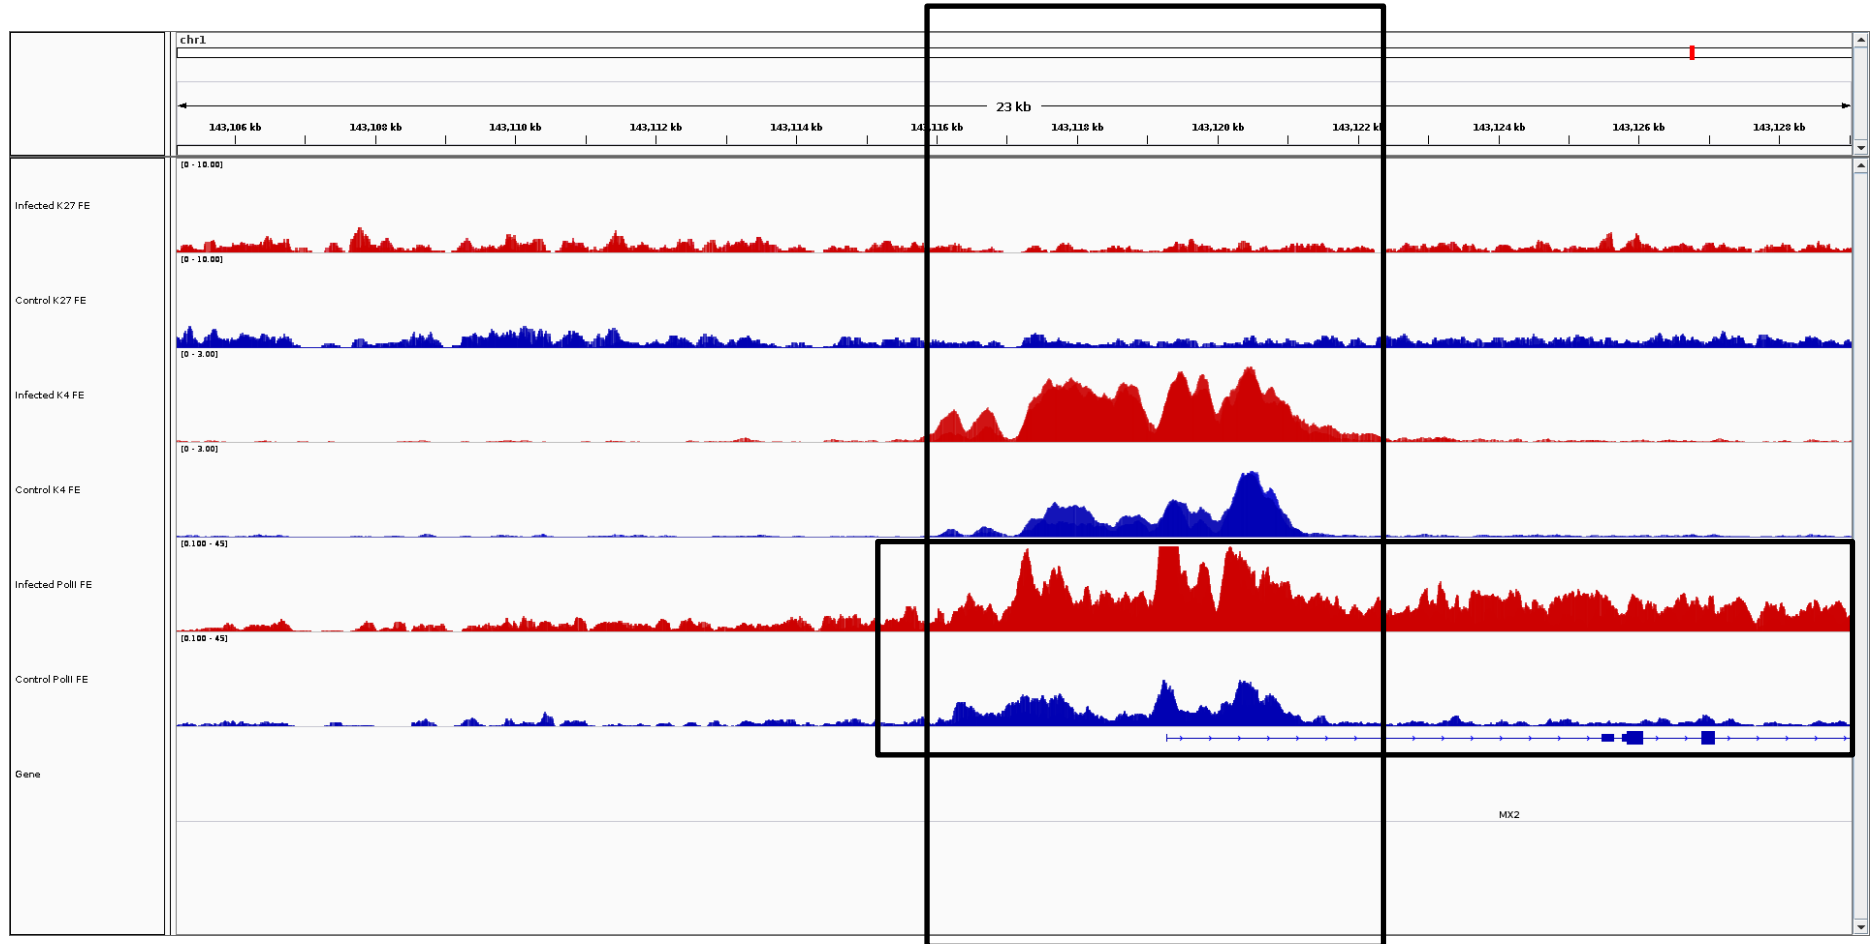

***MX2***

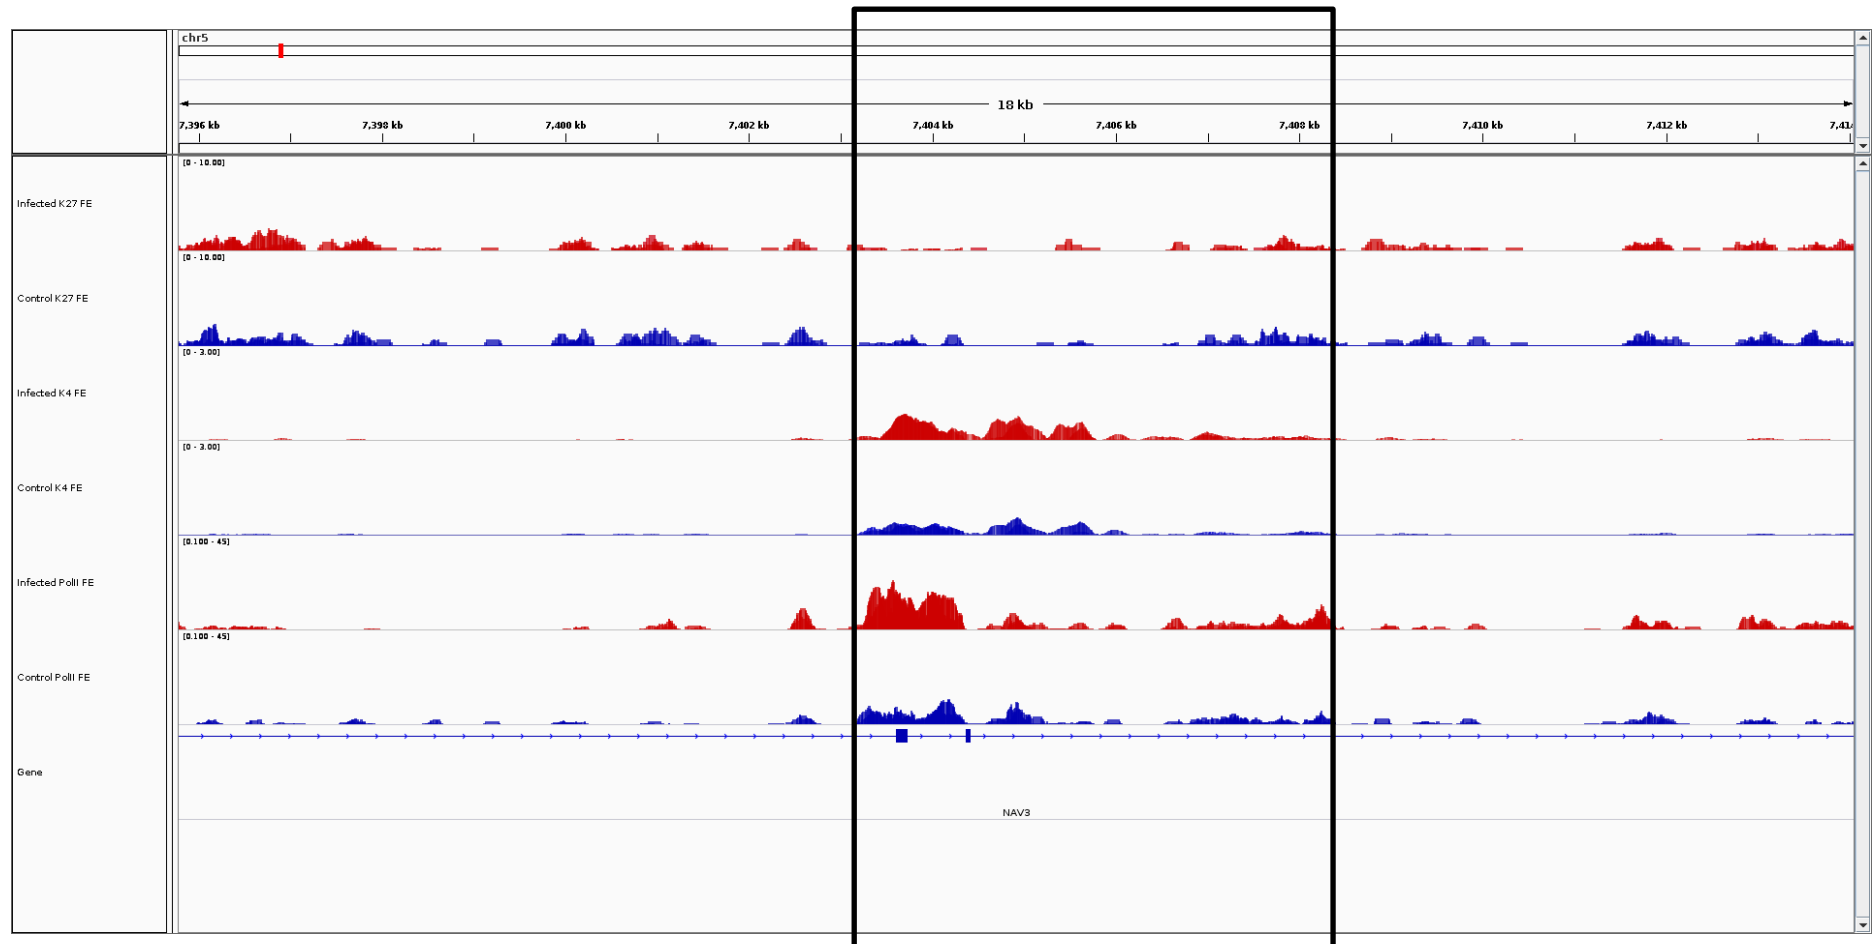**NAV3**

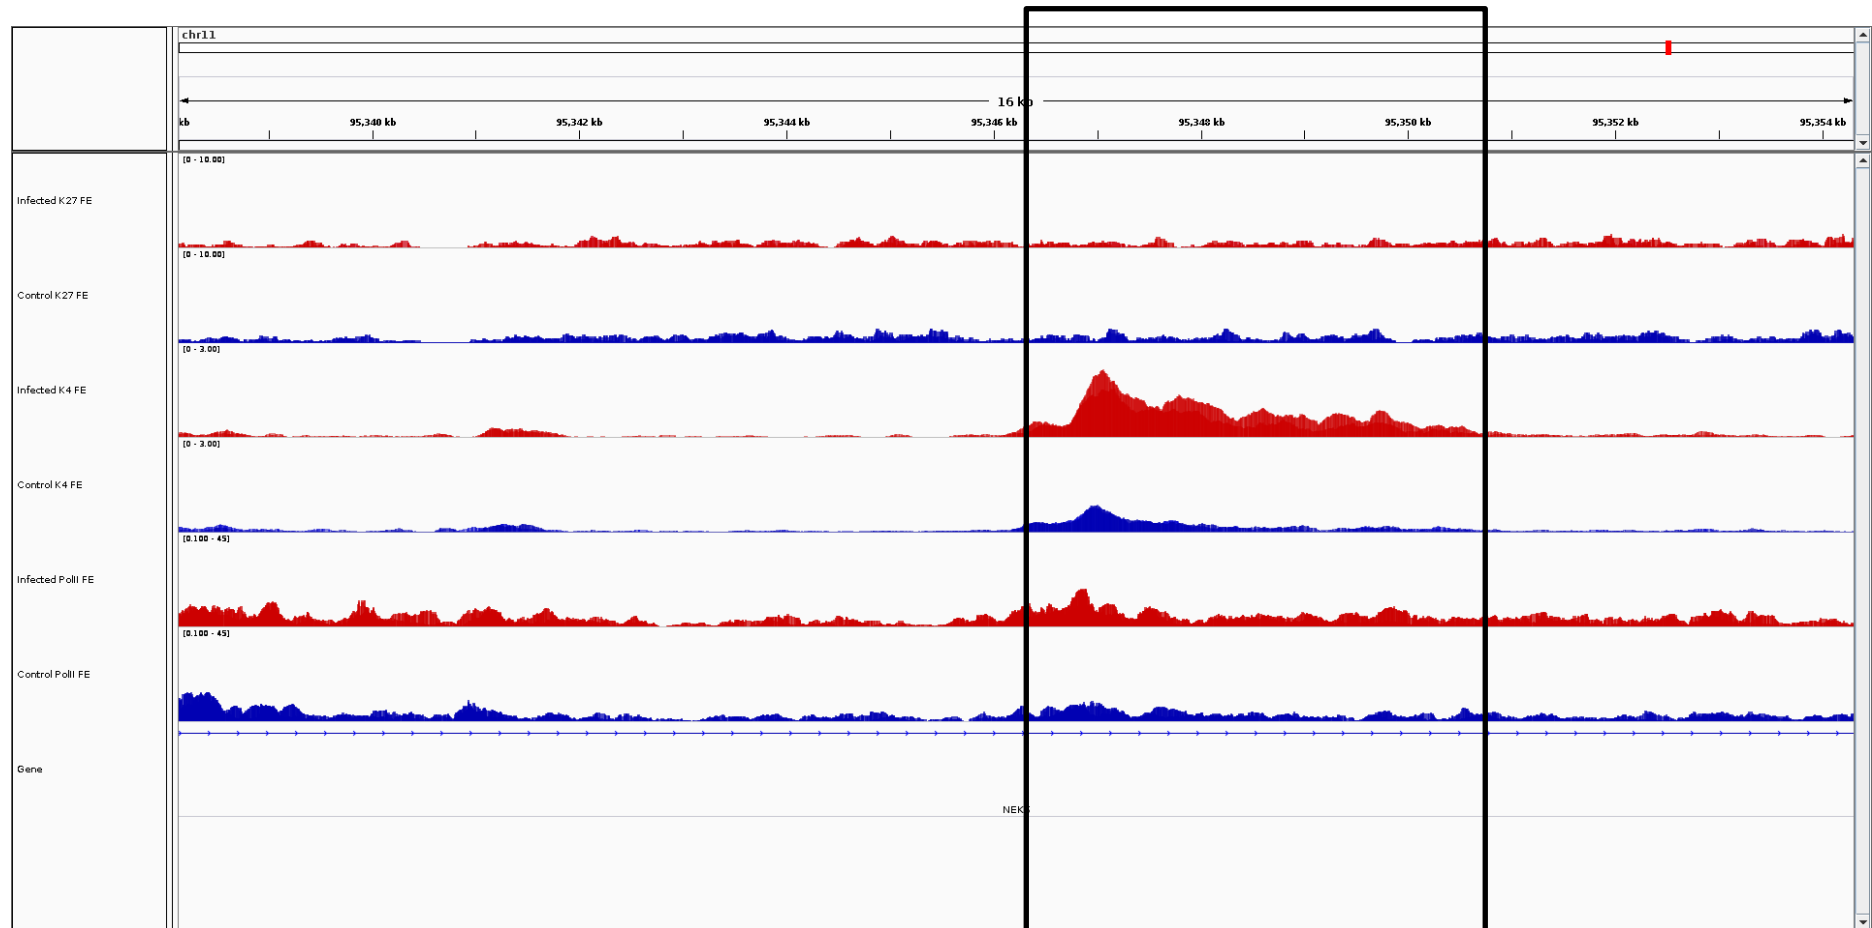

***NEK6***

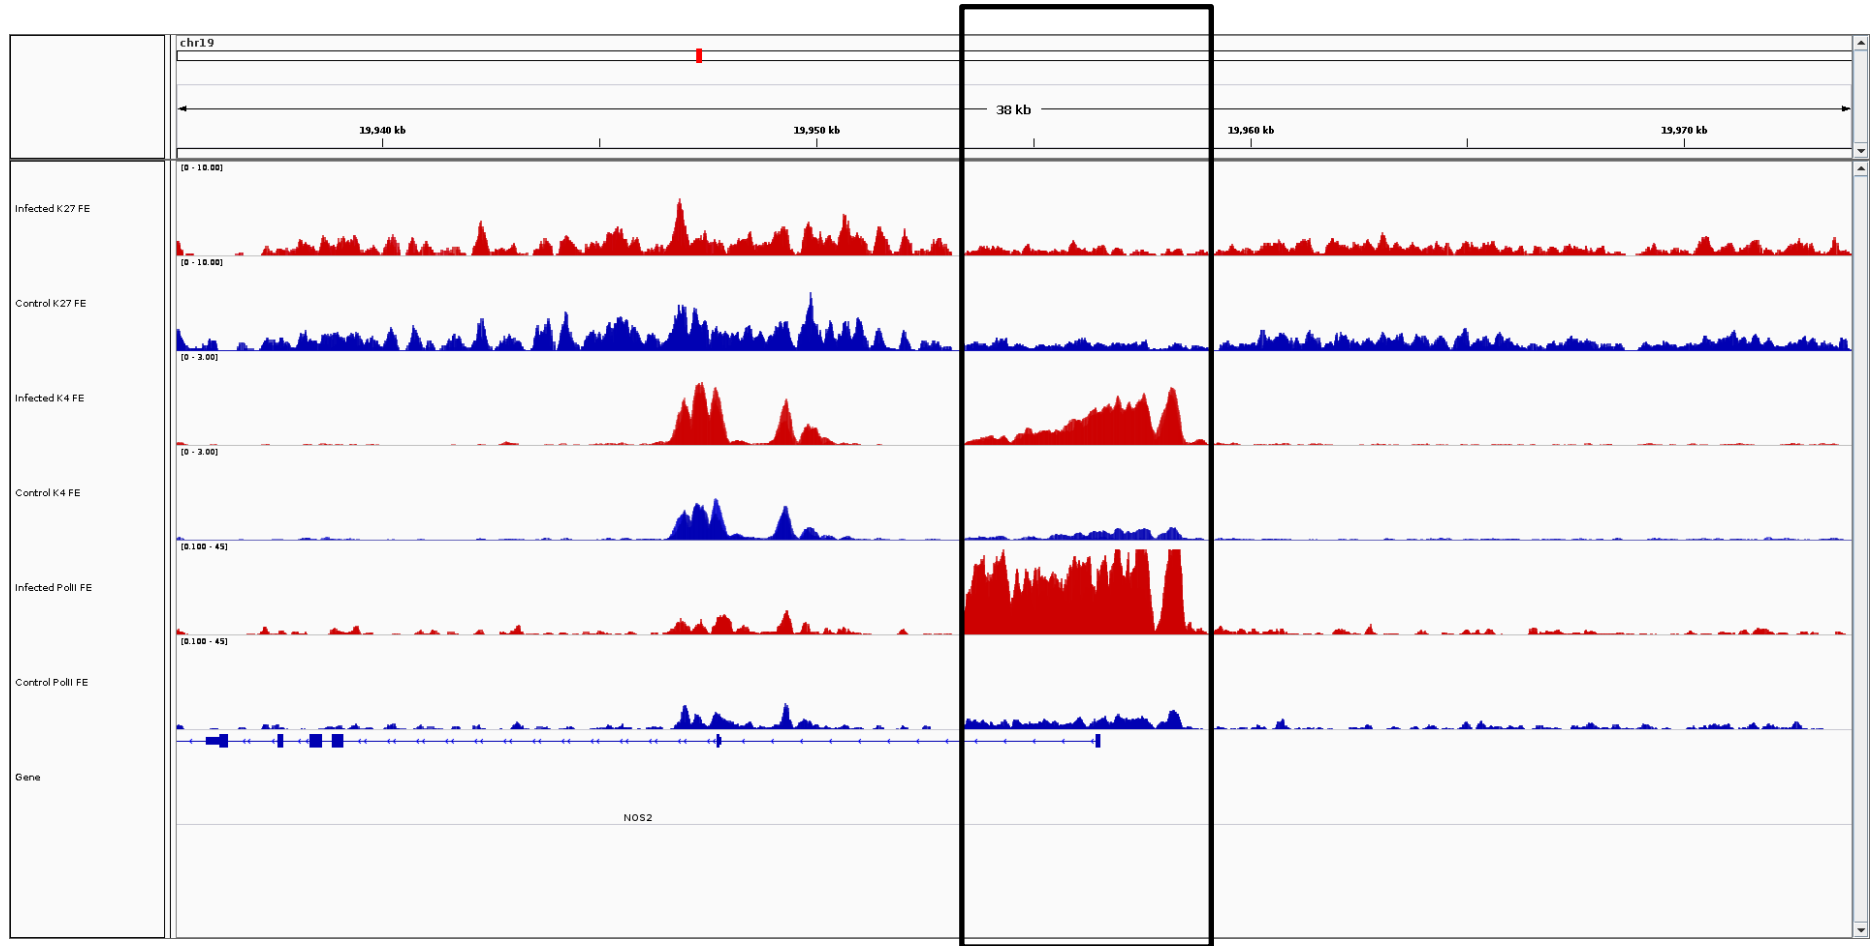

*NOS2*



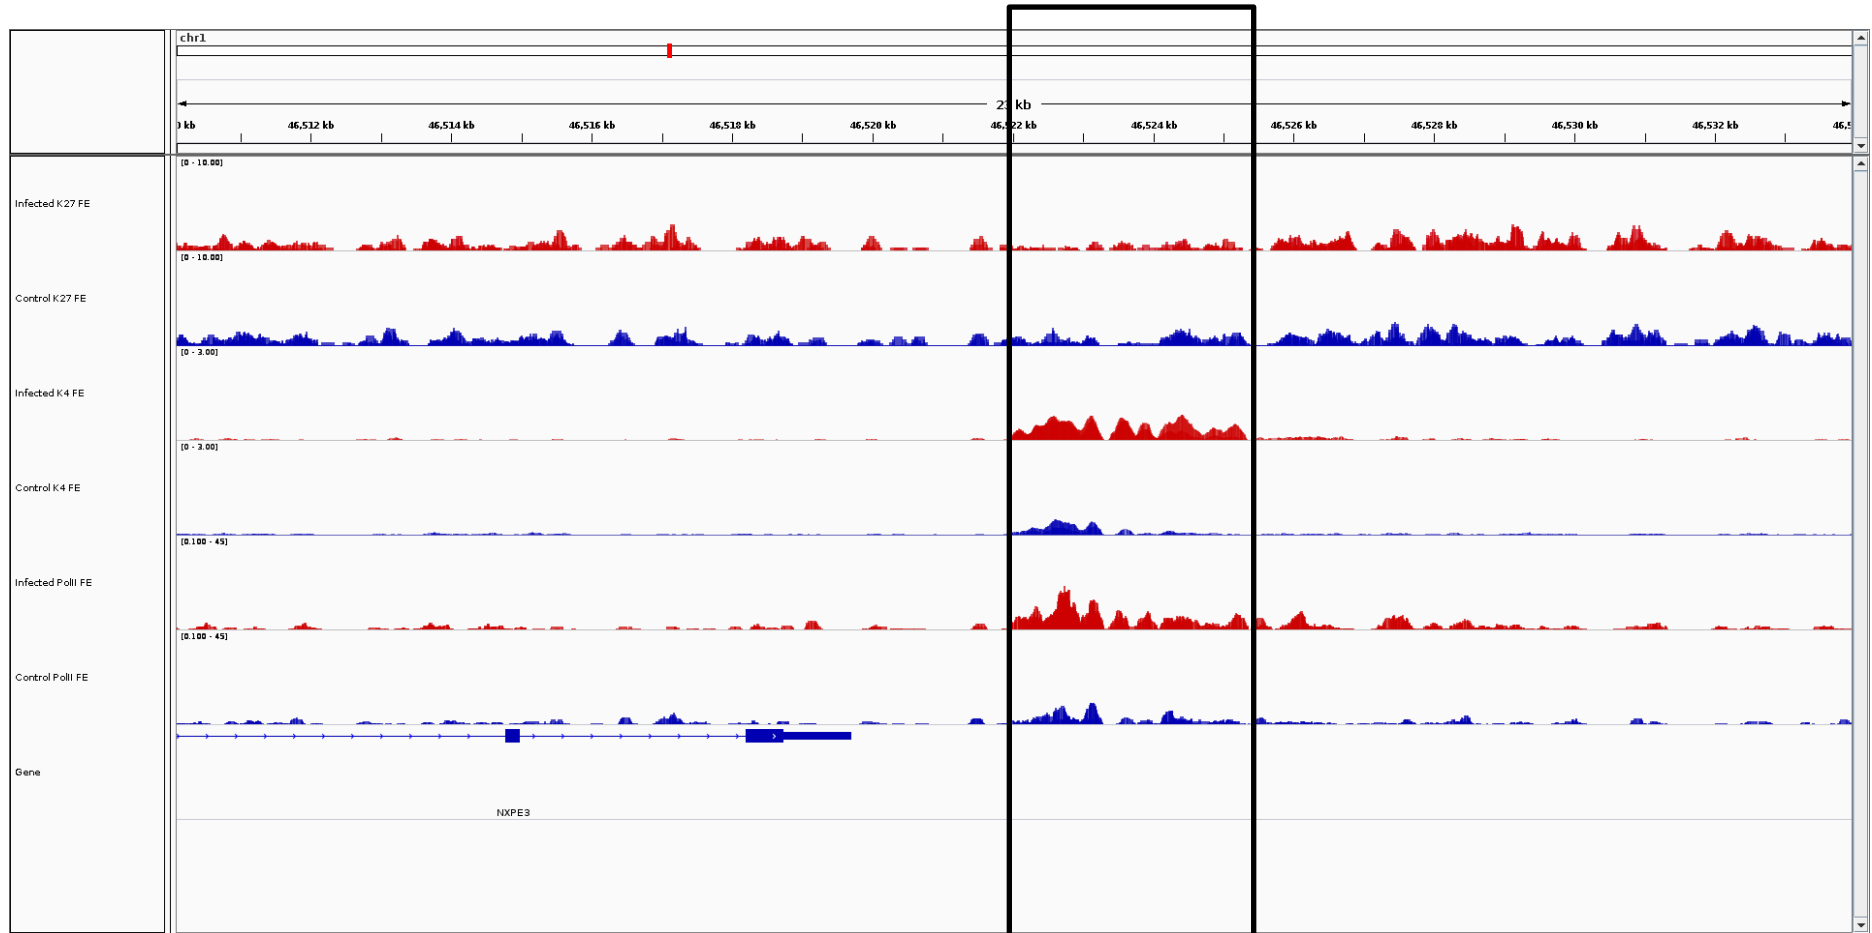

***NXPE3***

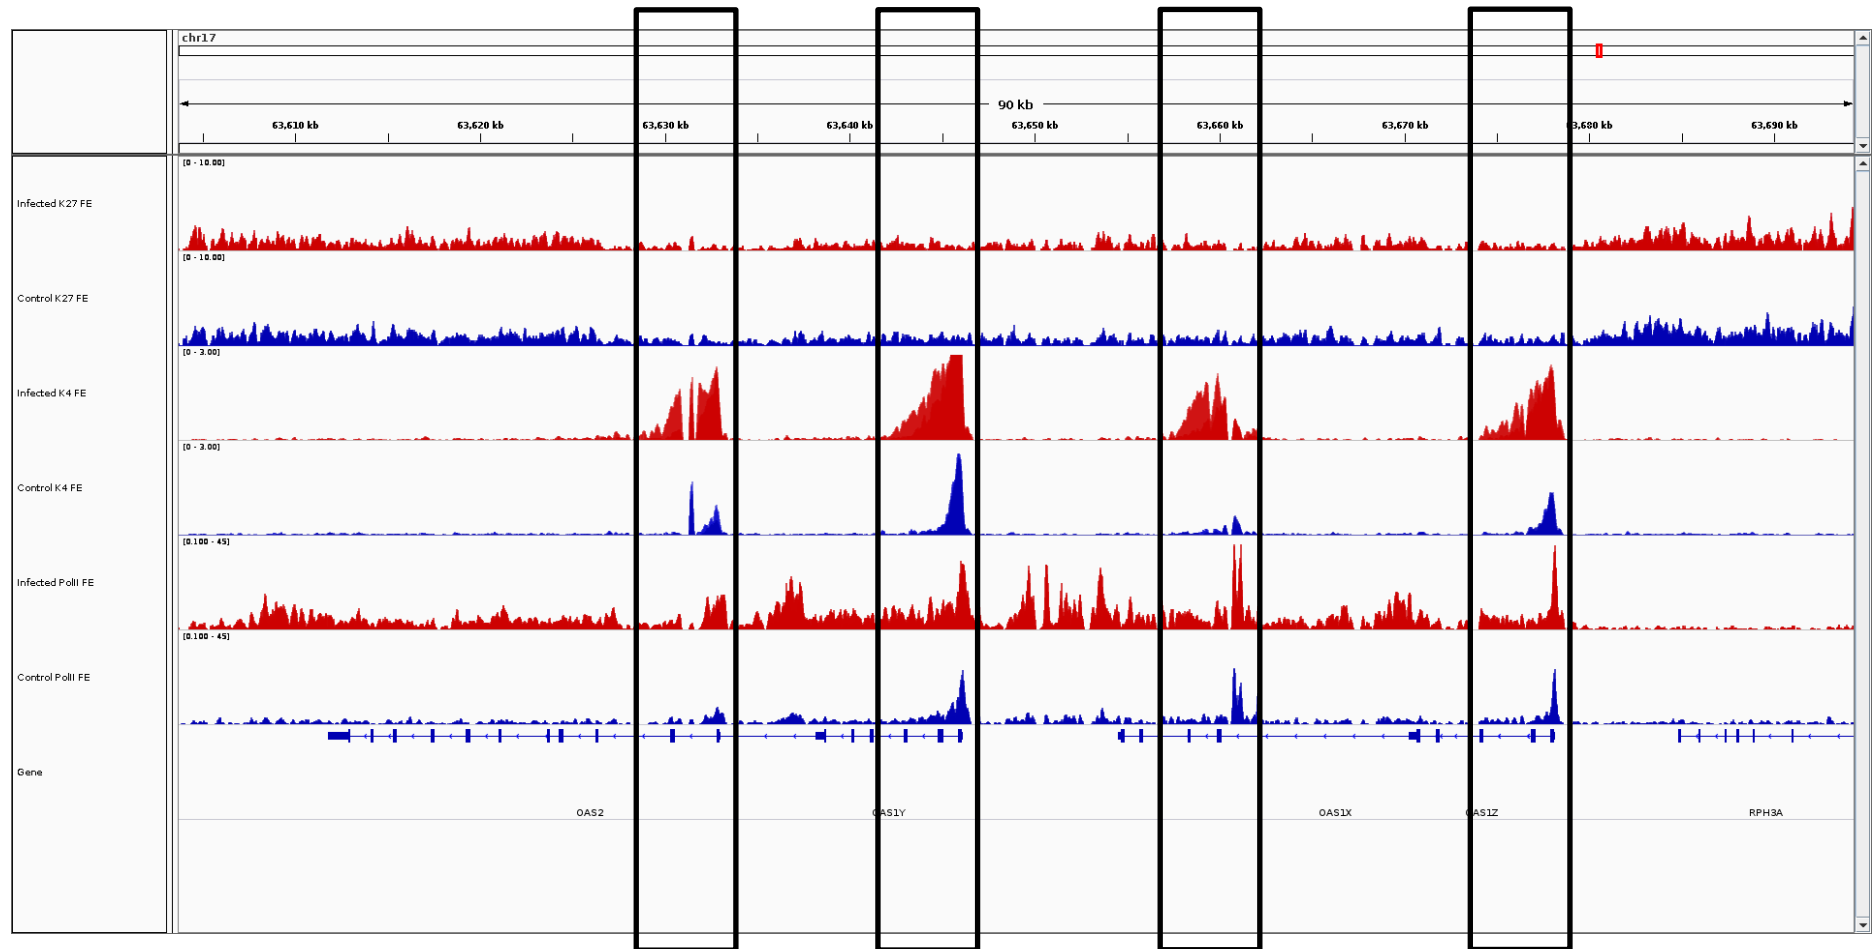

*OAS*

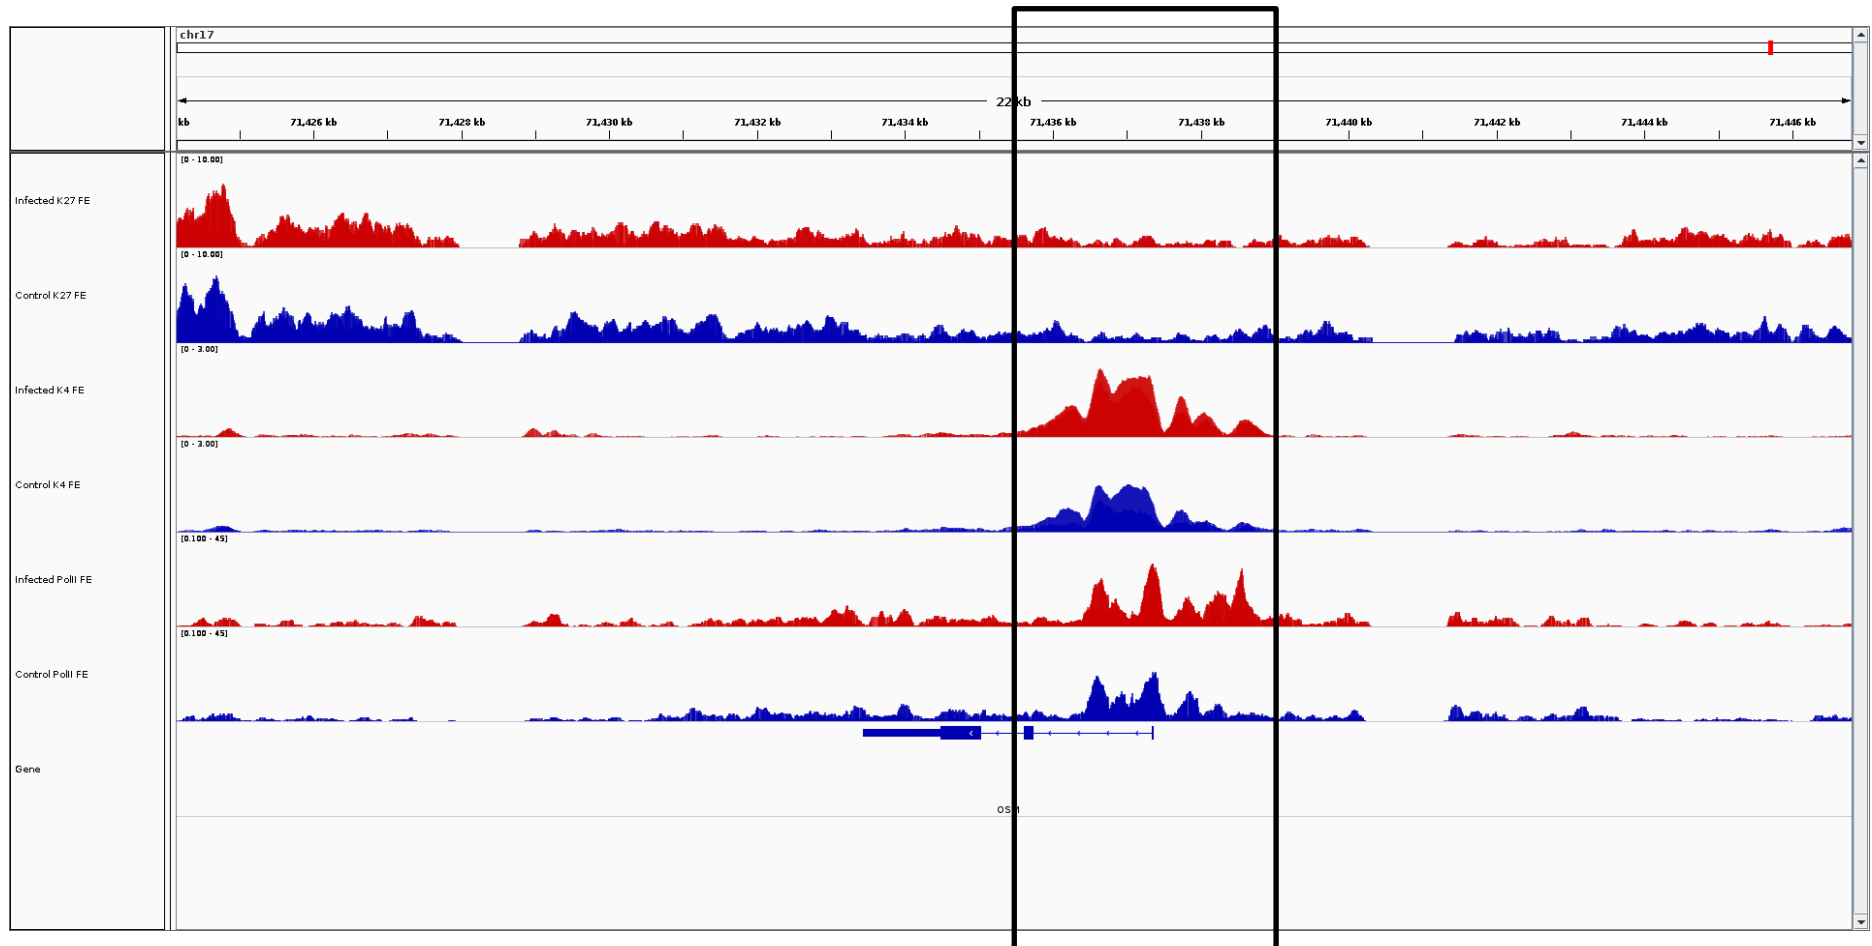

*OSM*

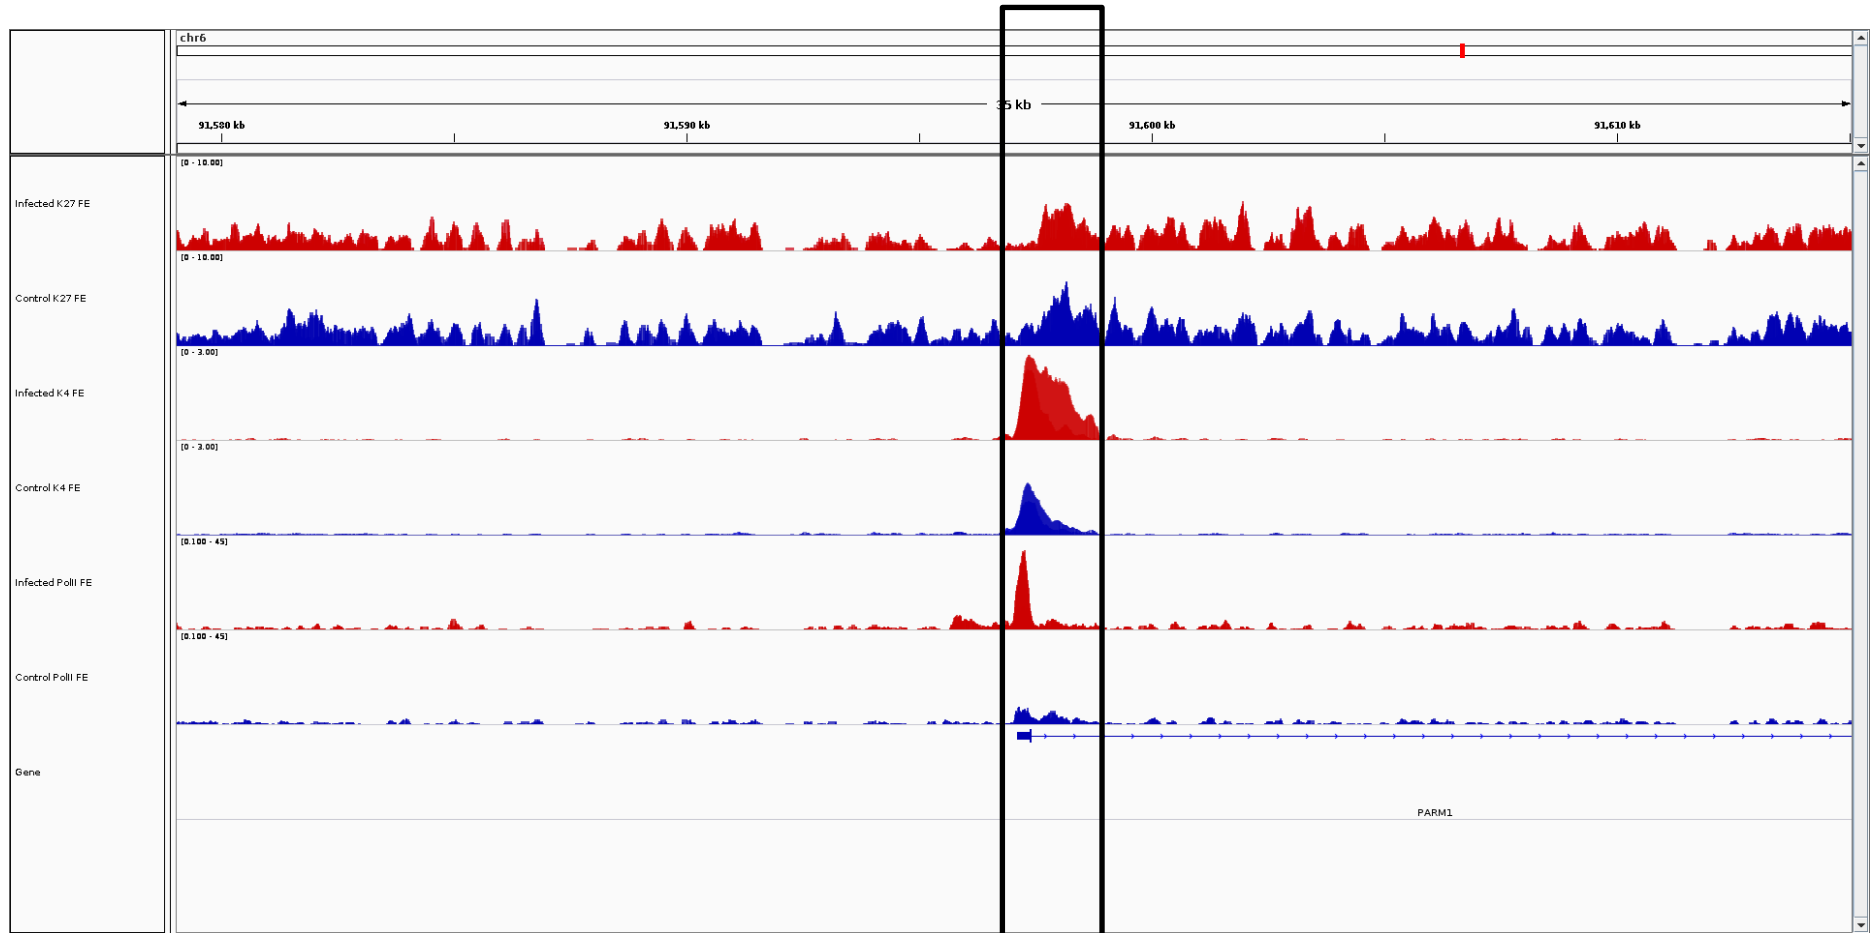

*PARM1*

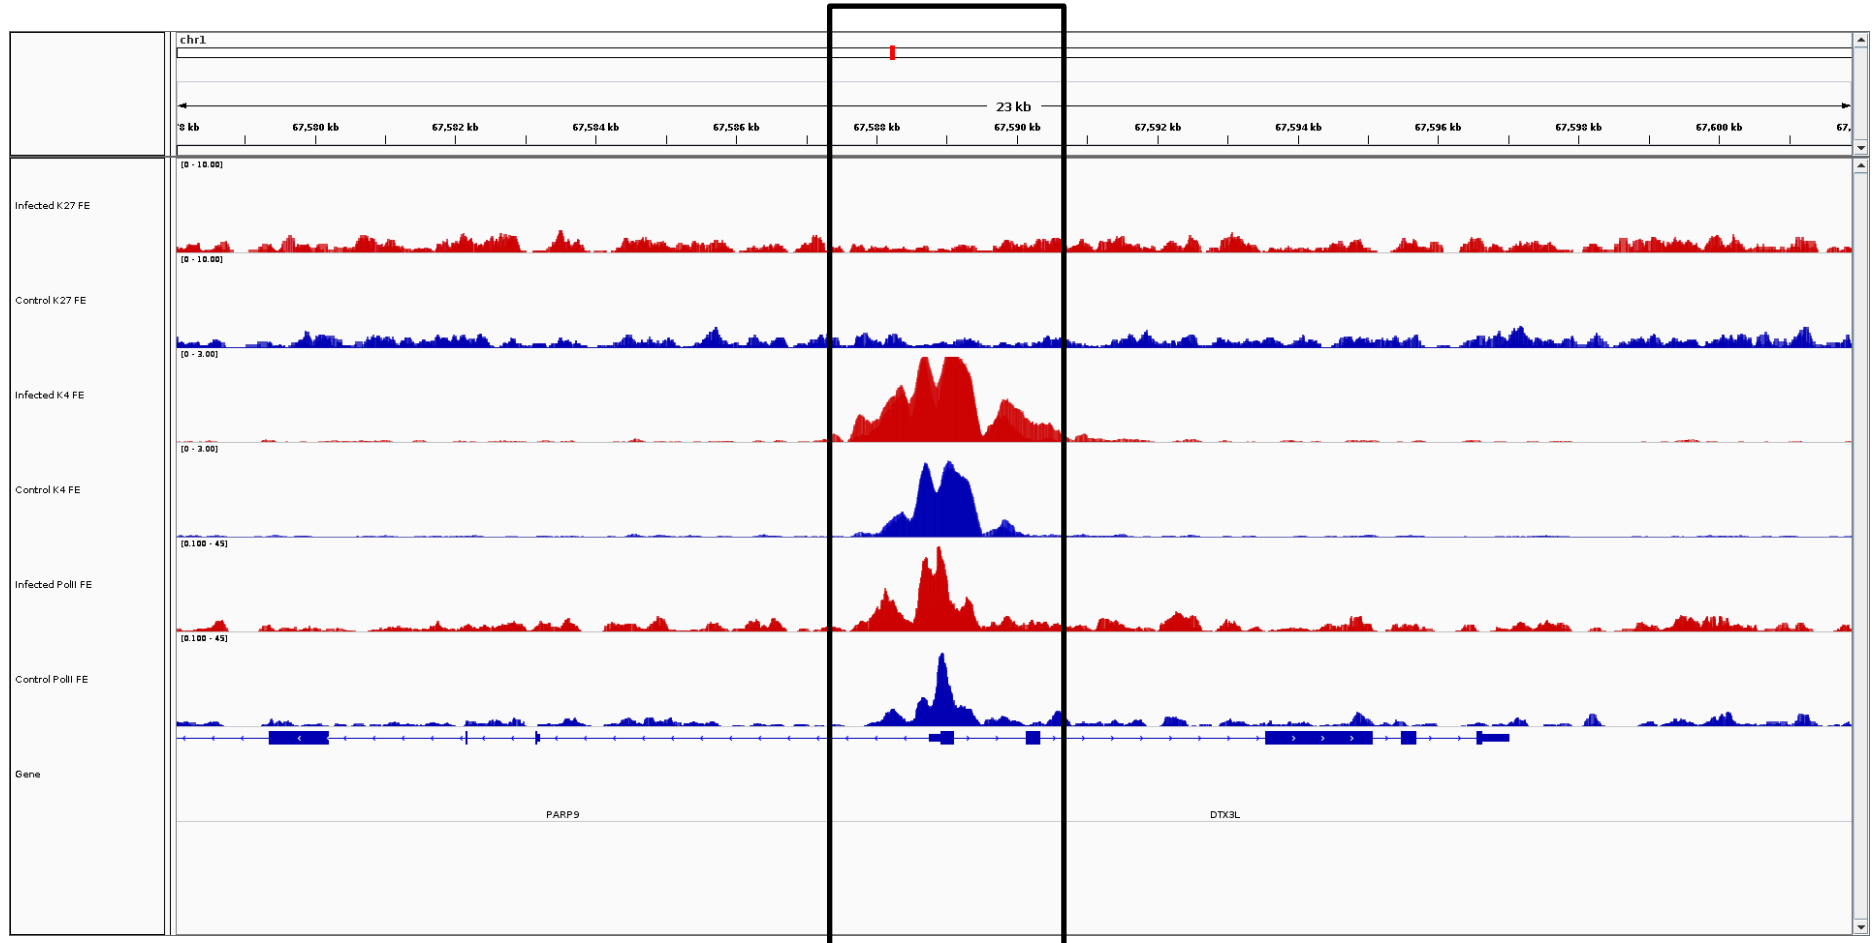

***PARP9***

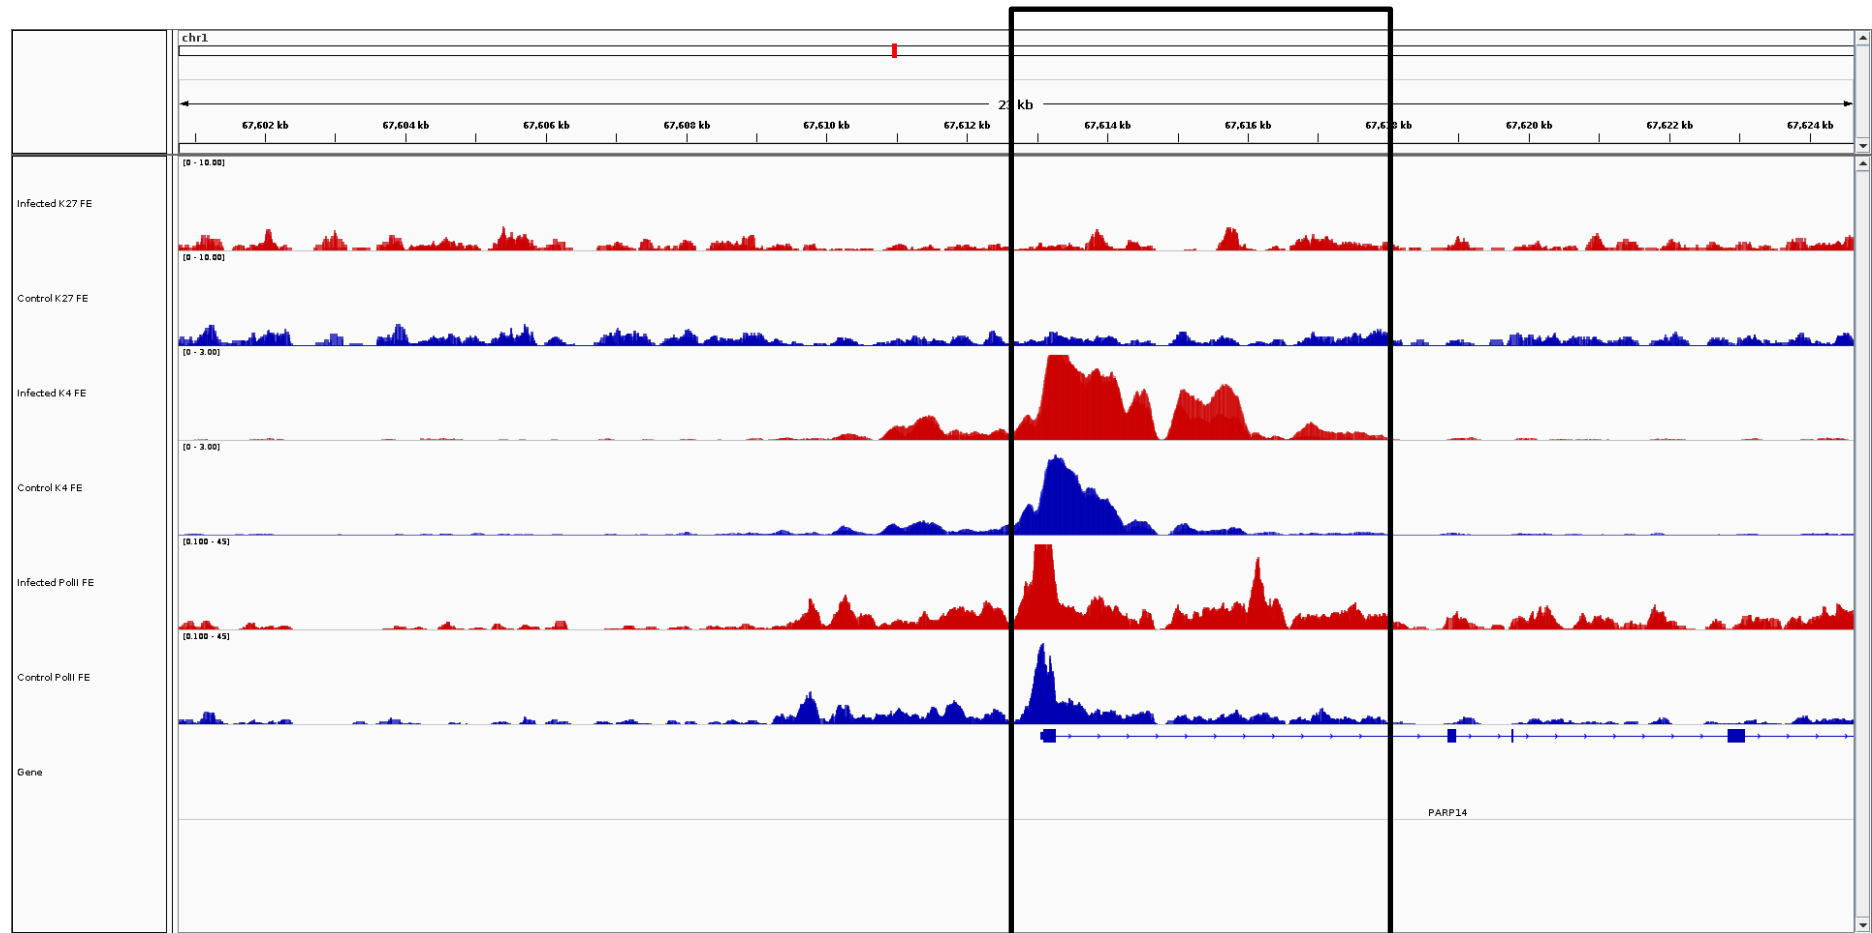

***PARP14***

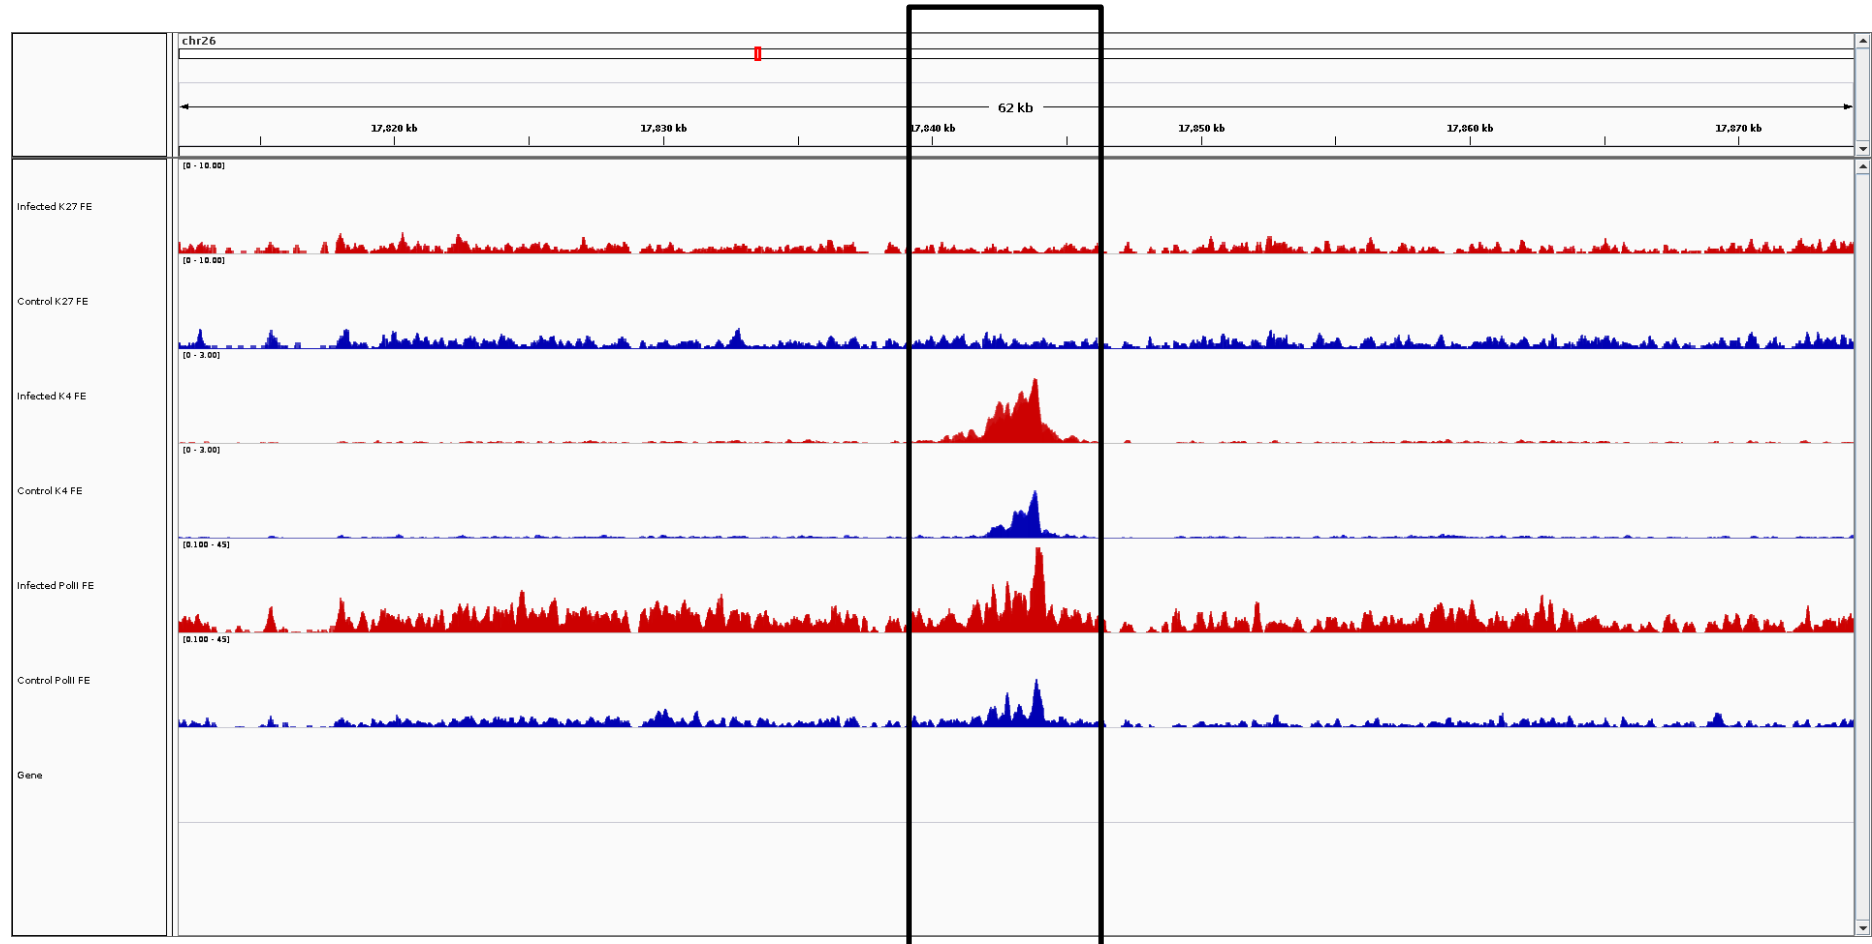

*PIK3AP1*

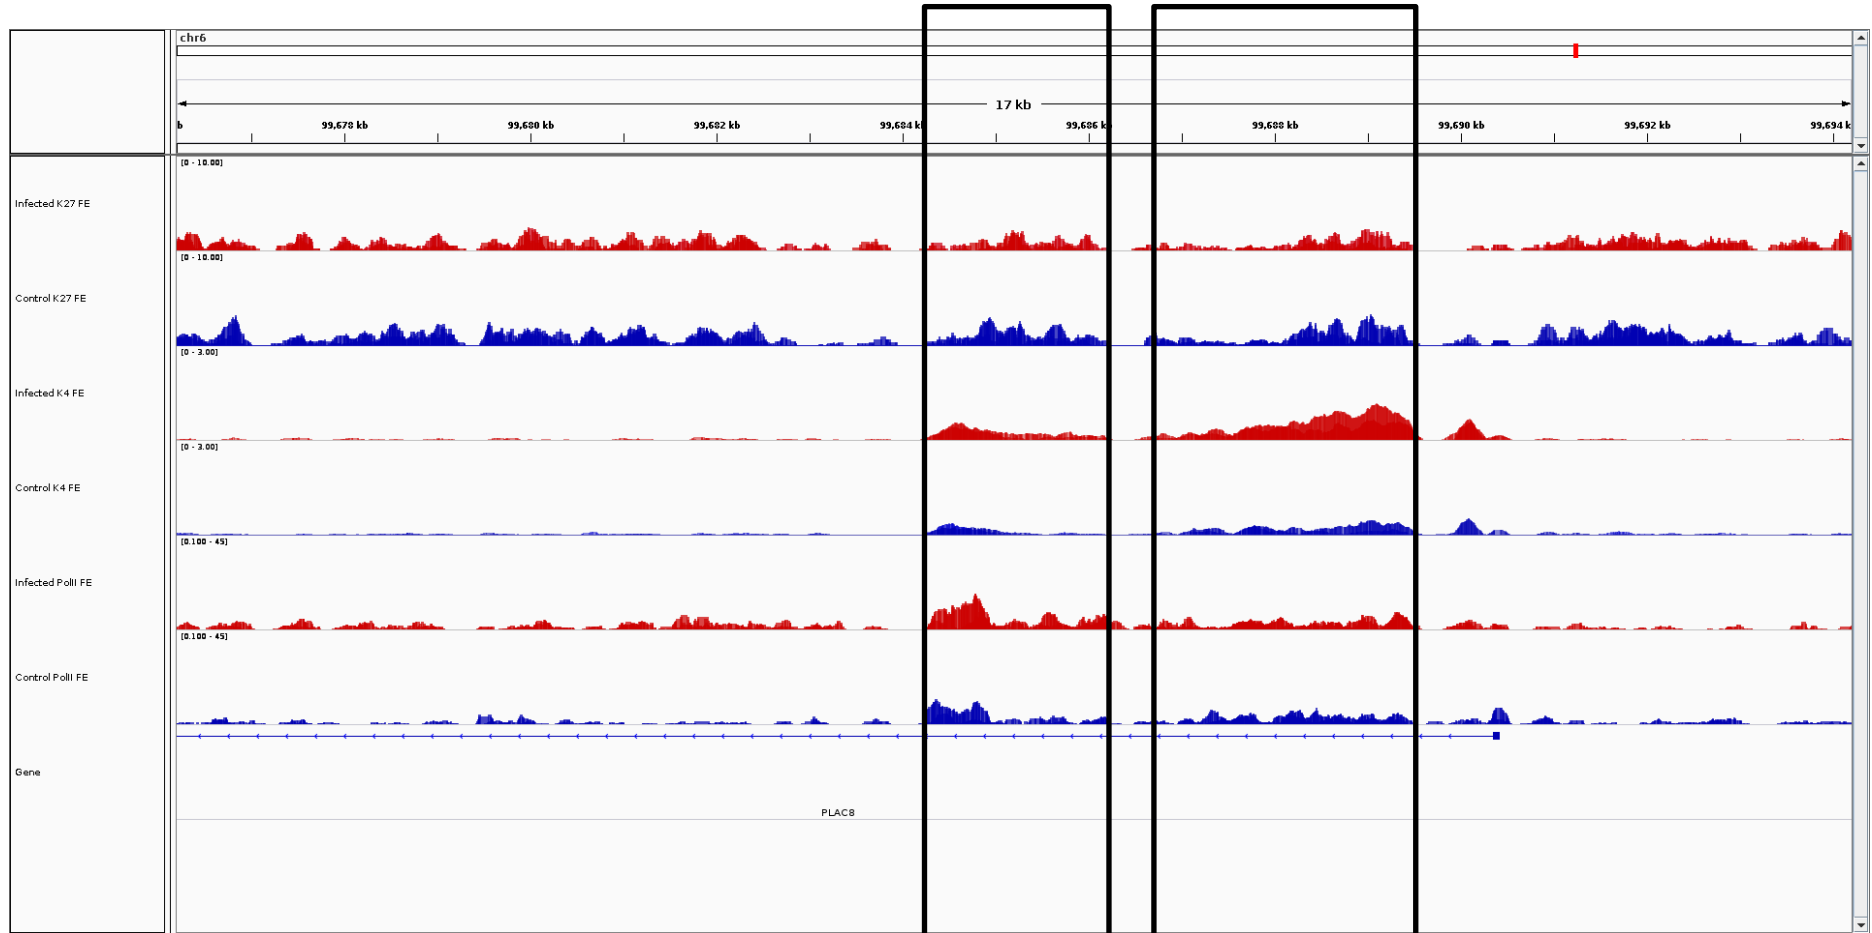

***PLAC8***



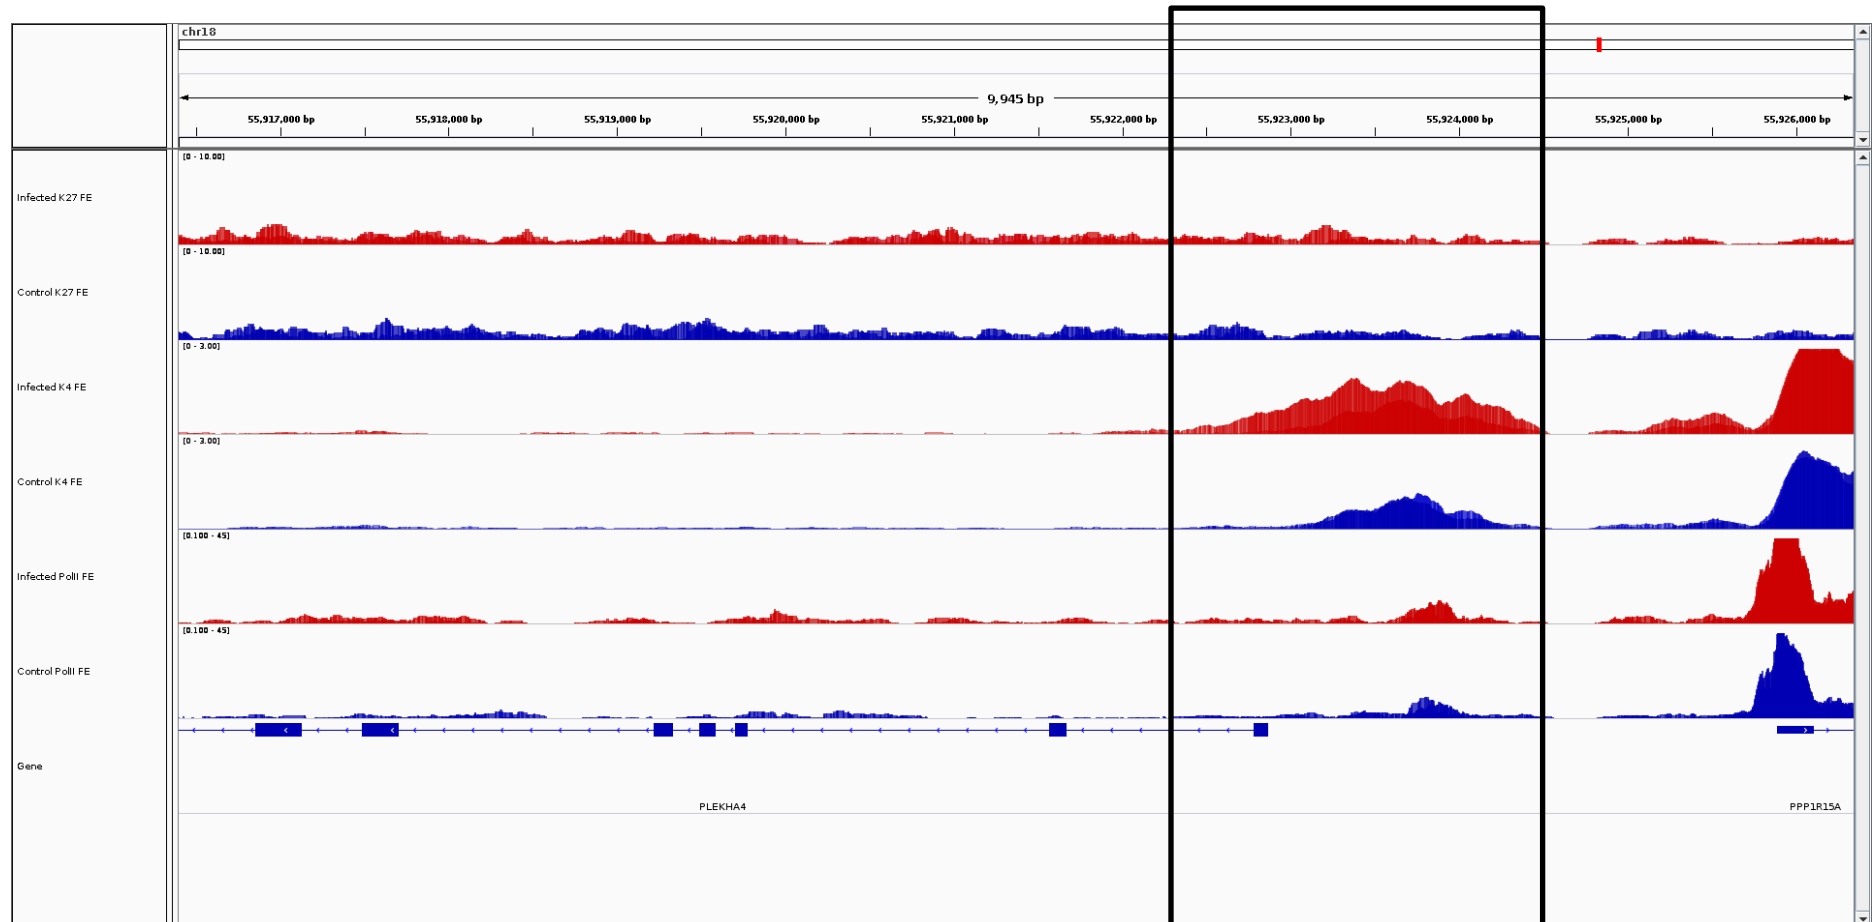

***PLEKHA4***

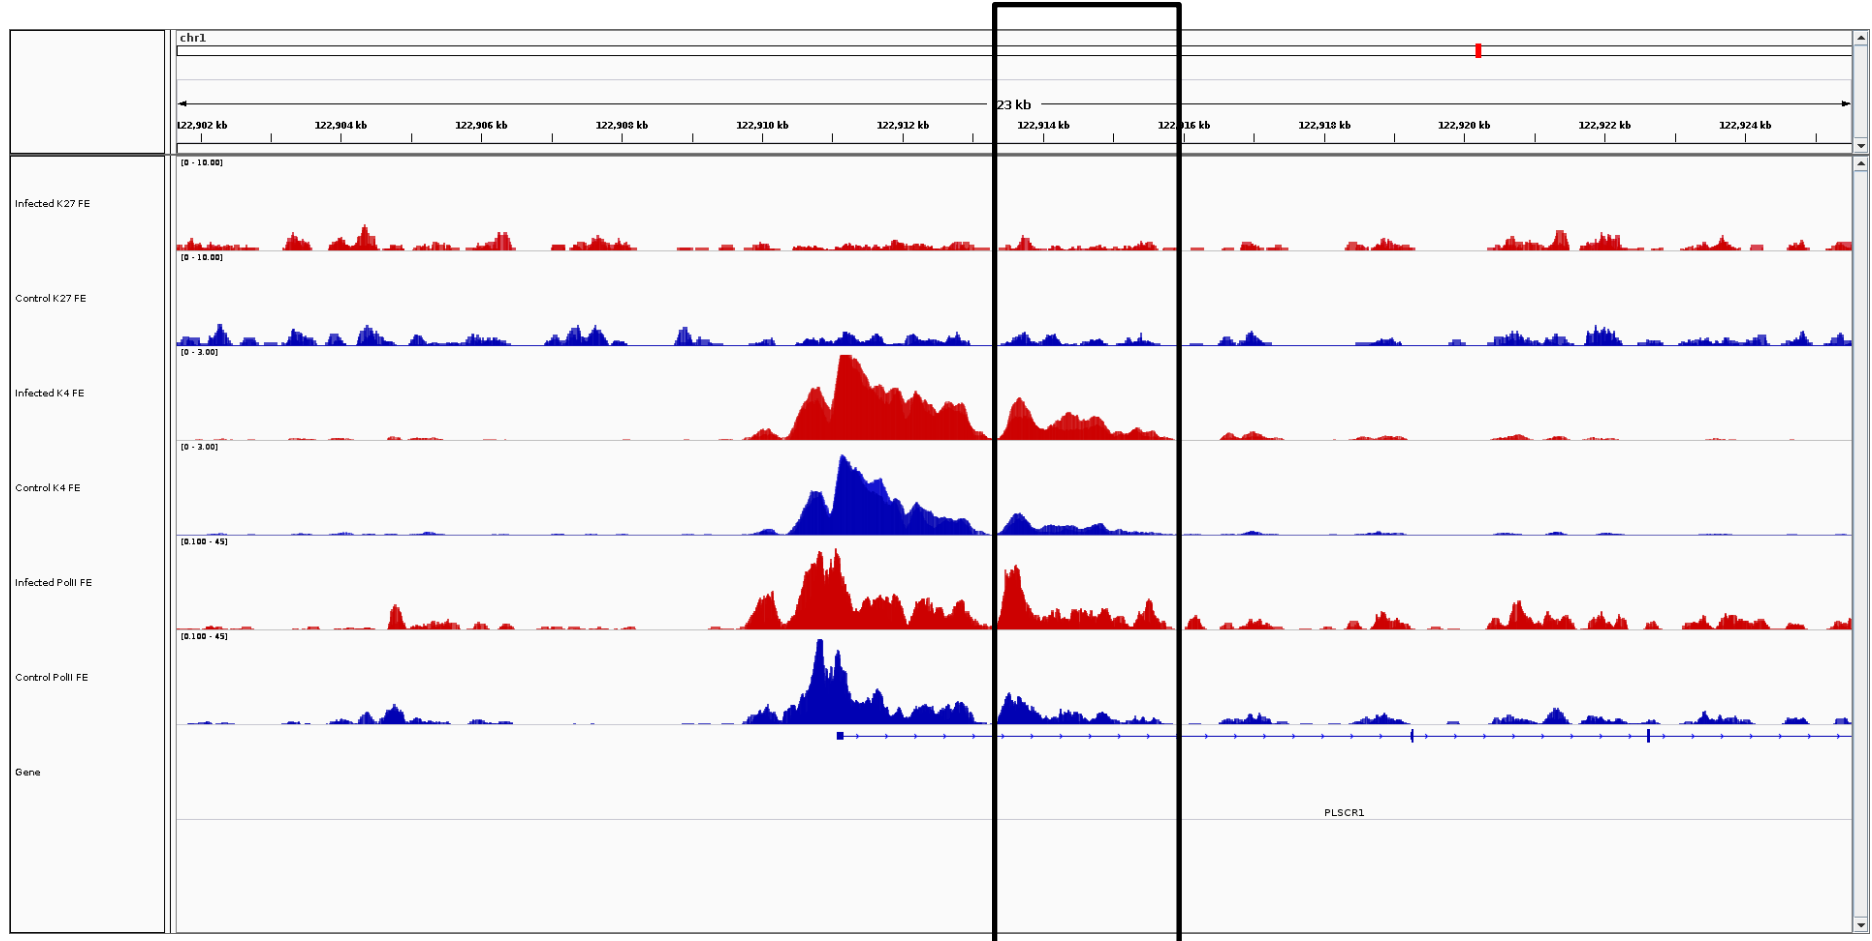

*PLSCR1*

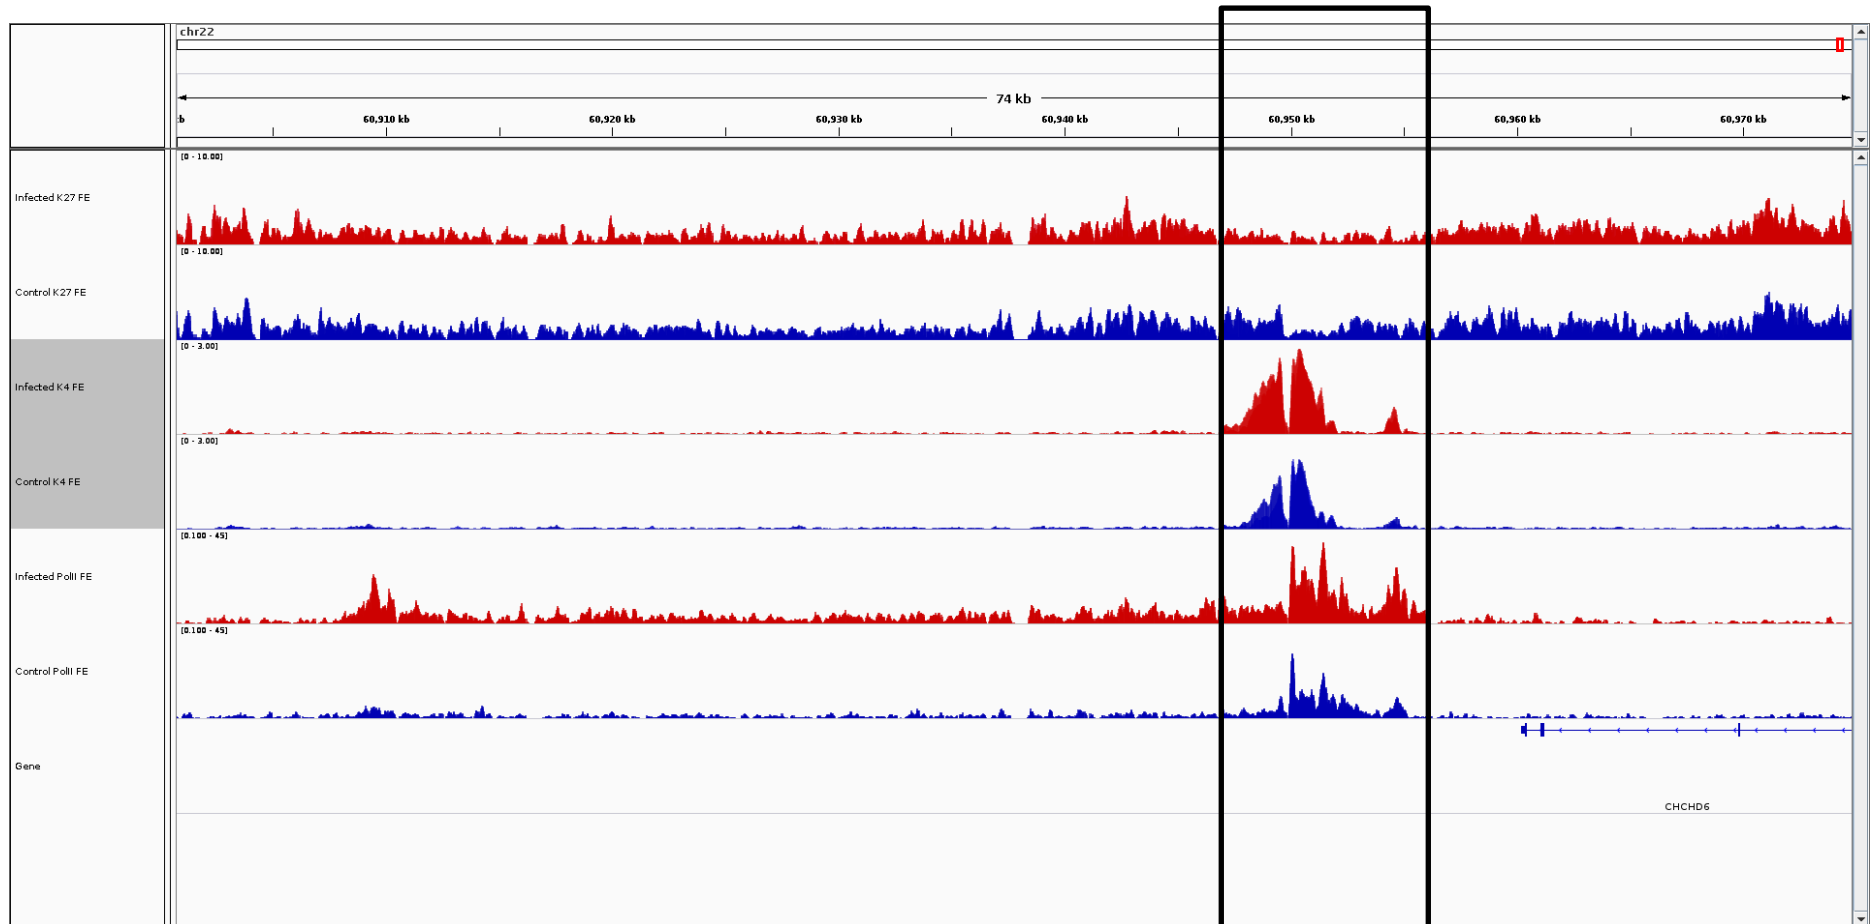

*PLXNA1*

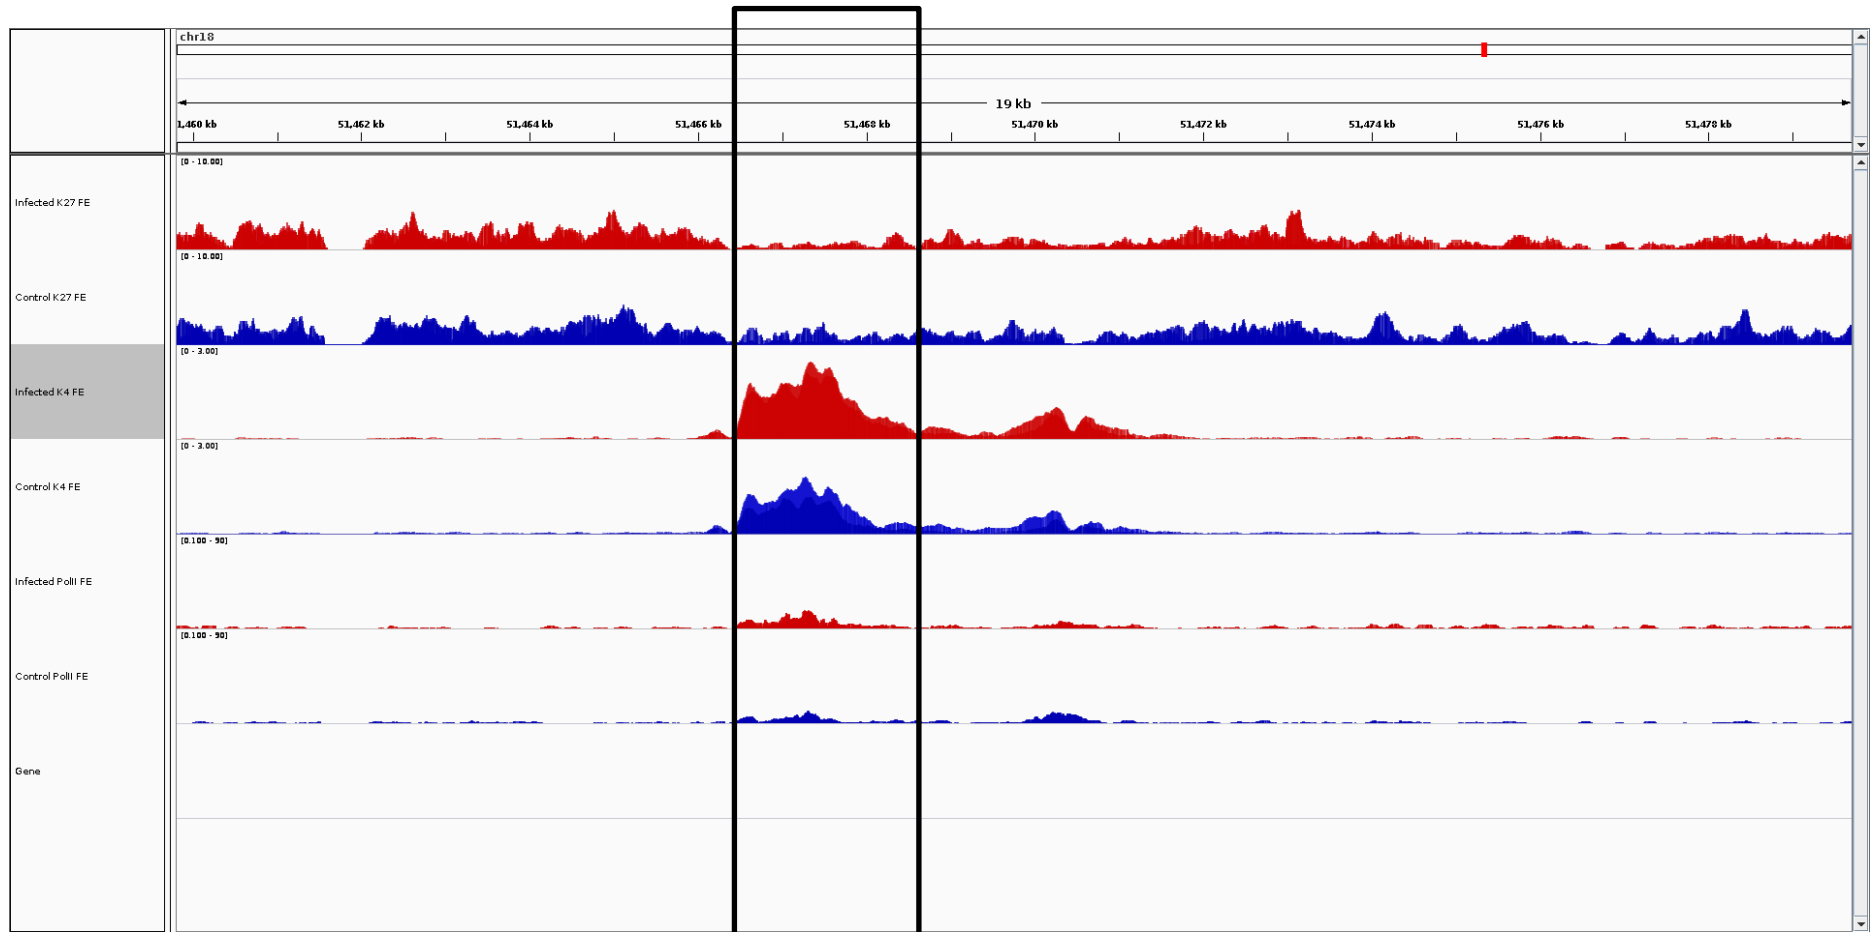

*POU2F2*

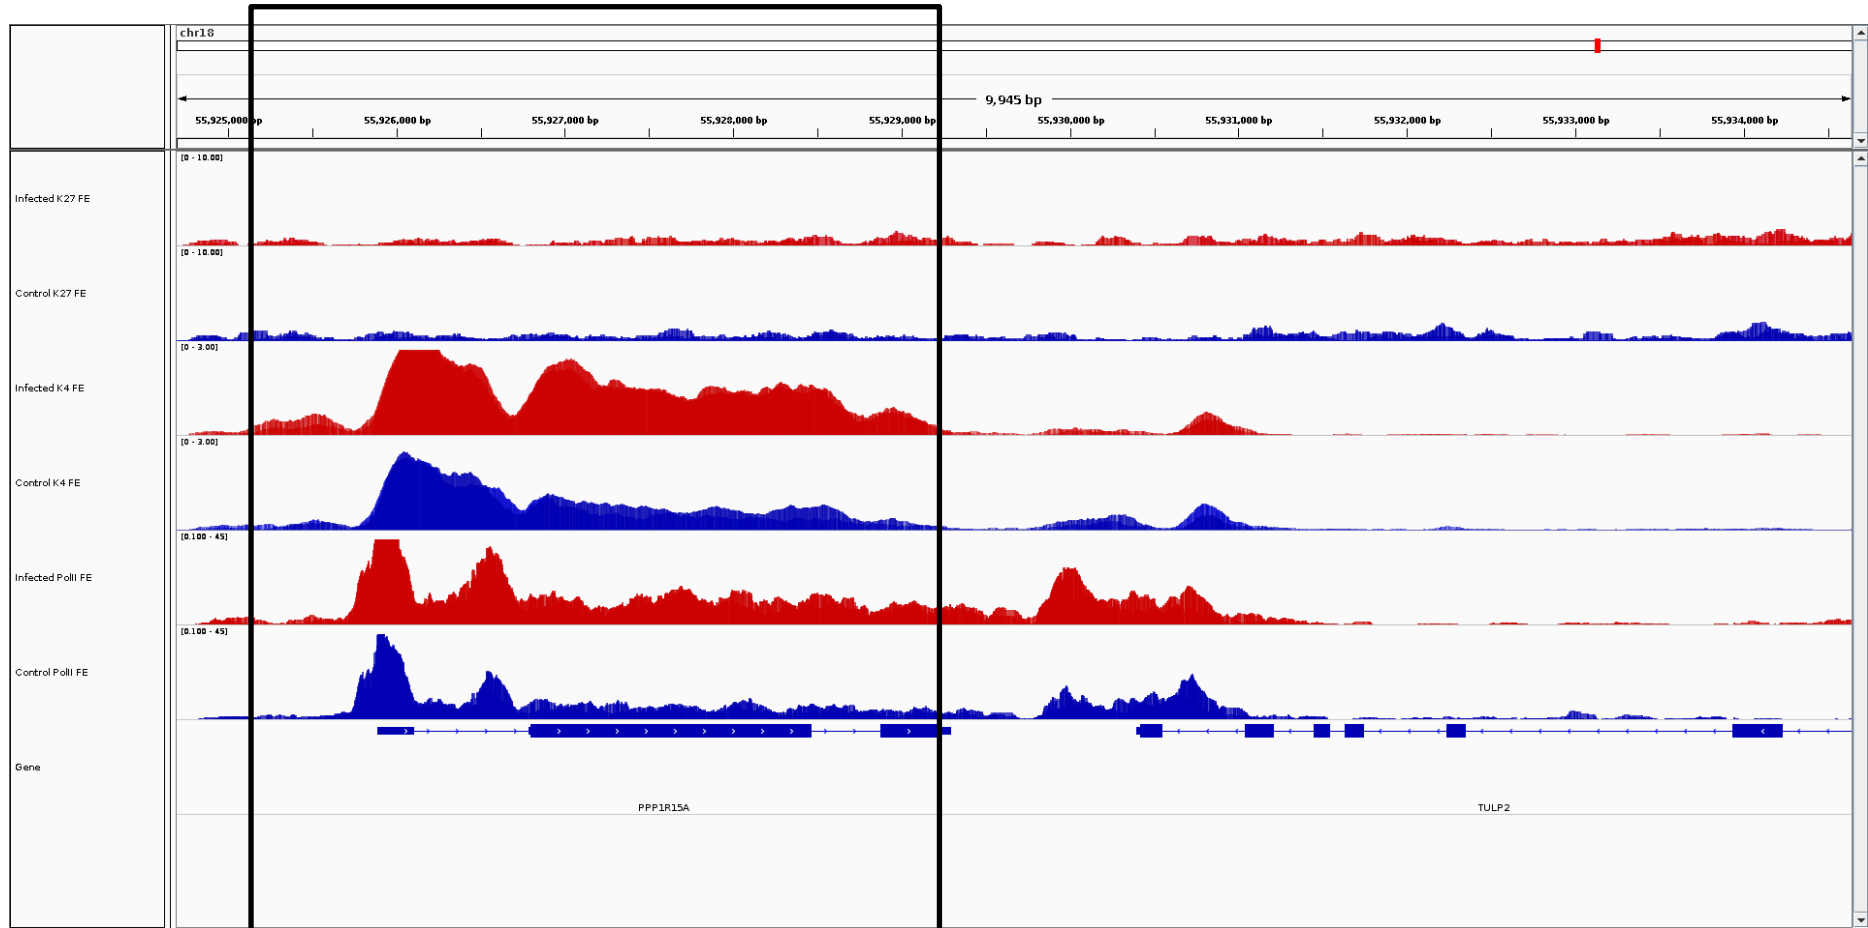

*PPP1R15A*

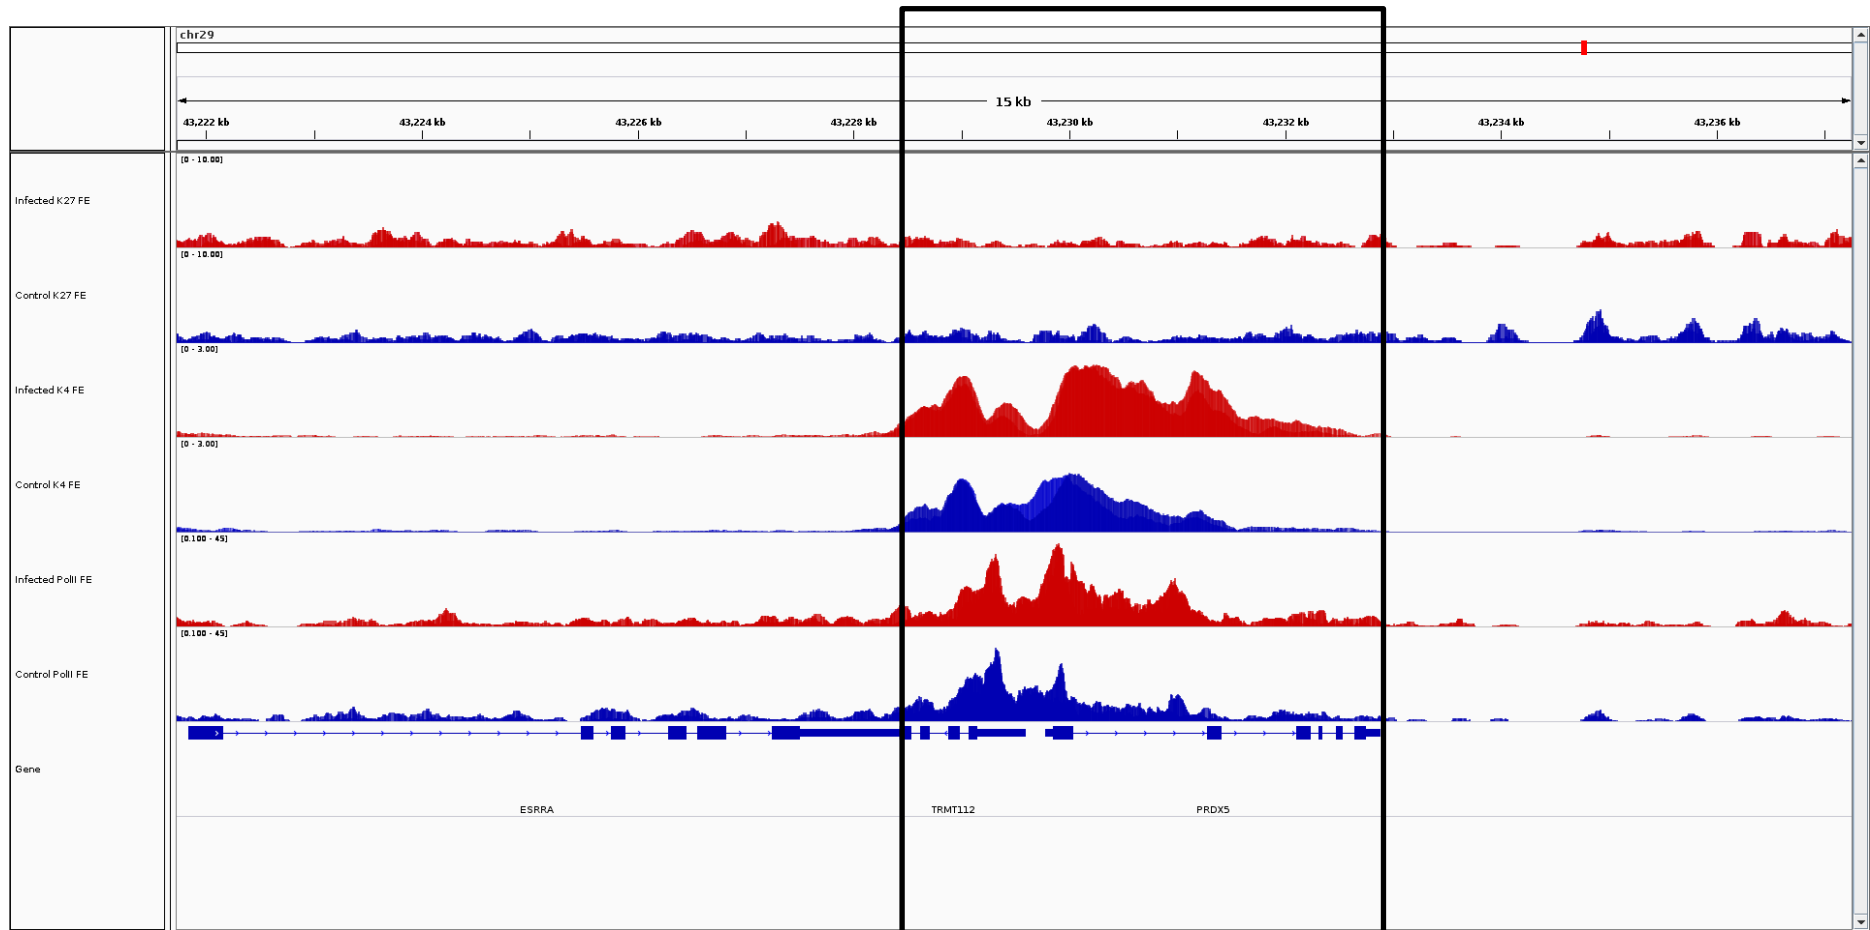

*PRDX2, TRMT112*

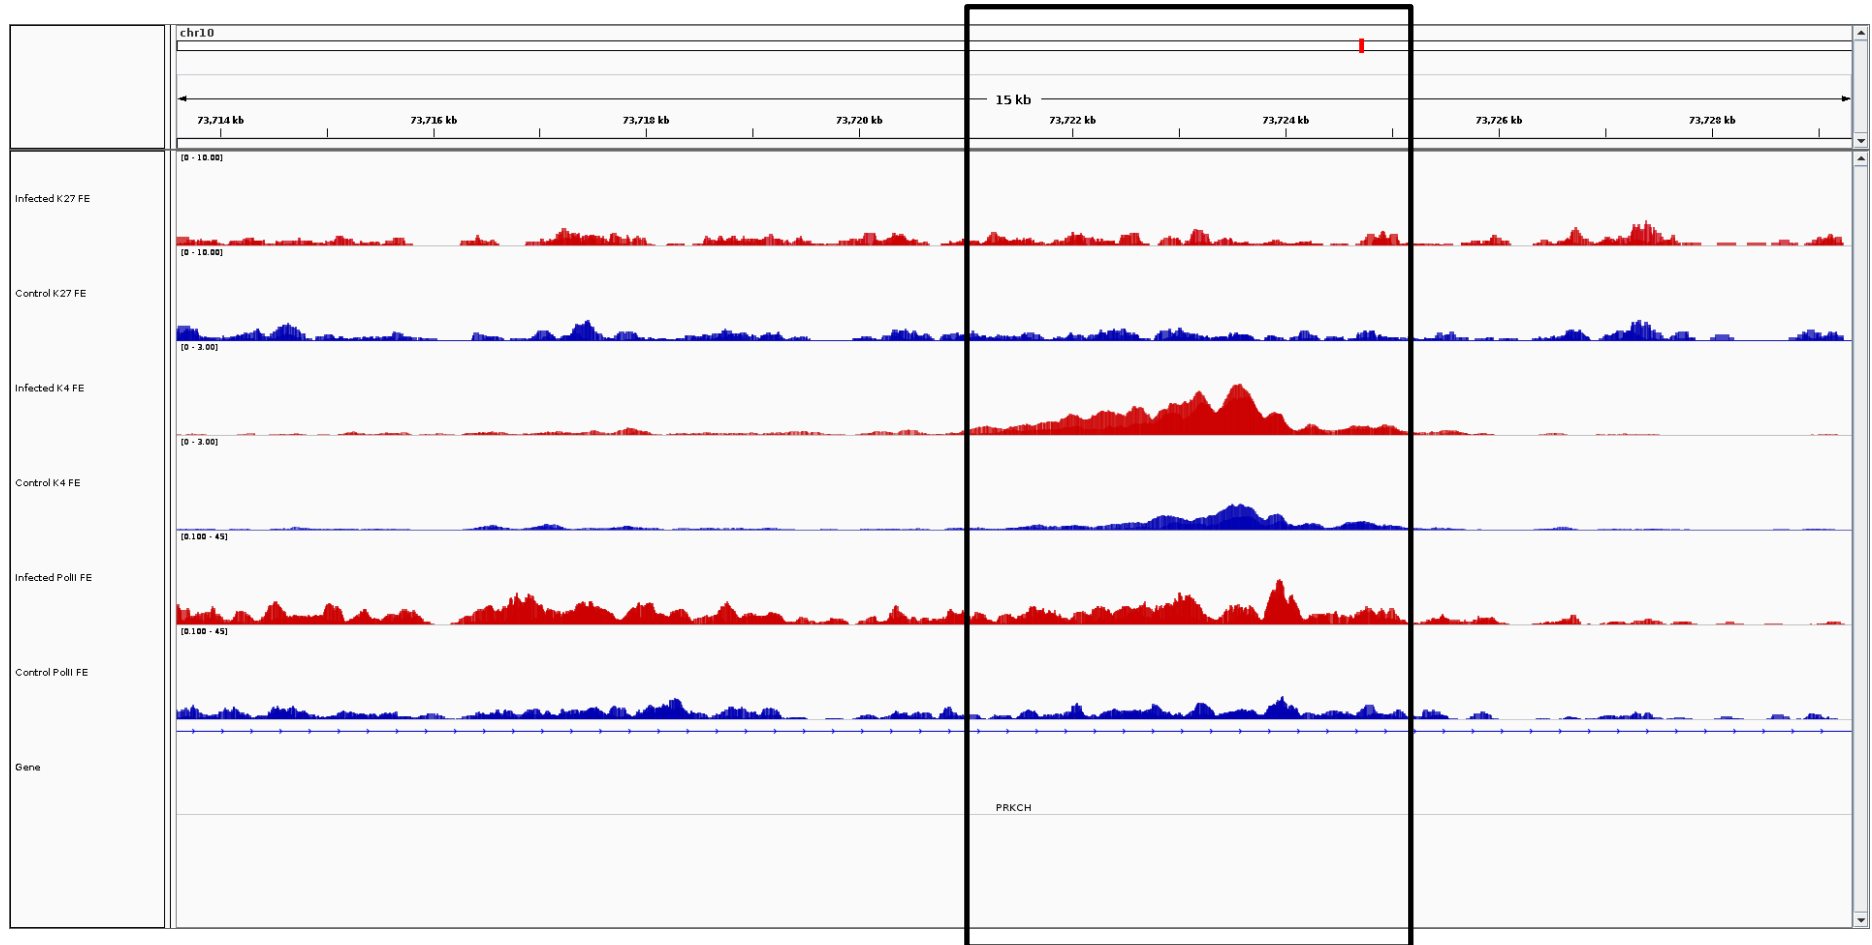

***PRKCH***

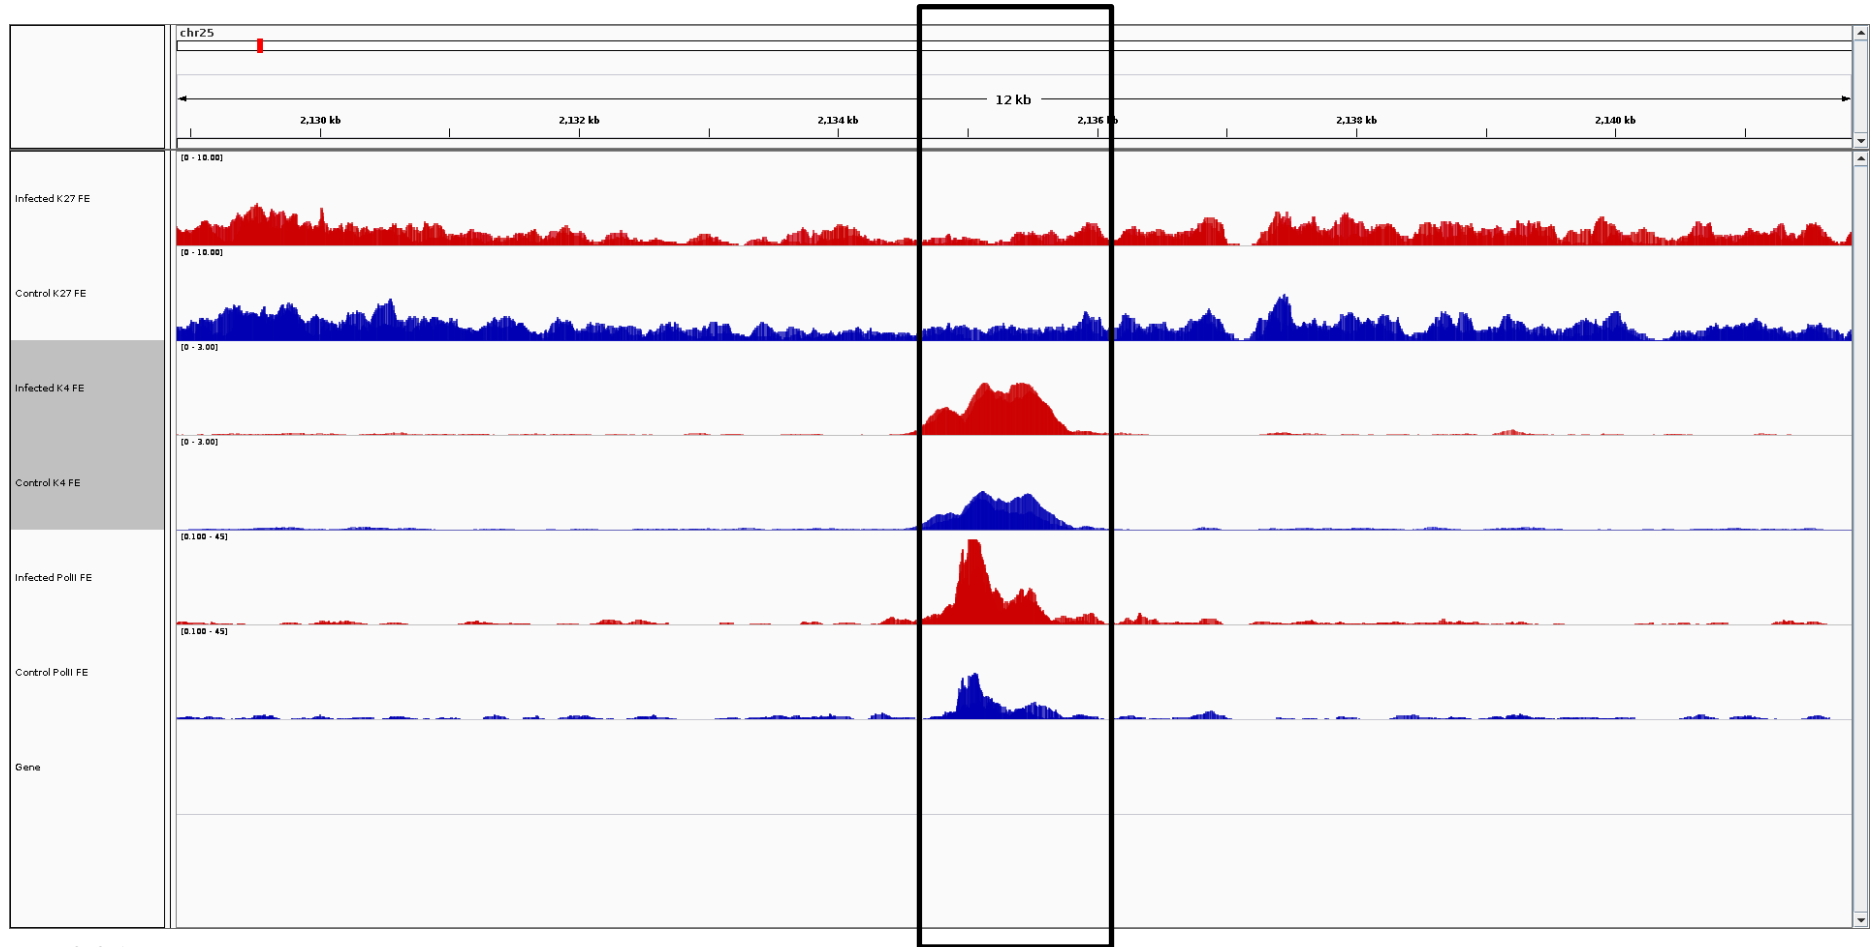

***PRSS27***



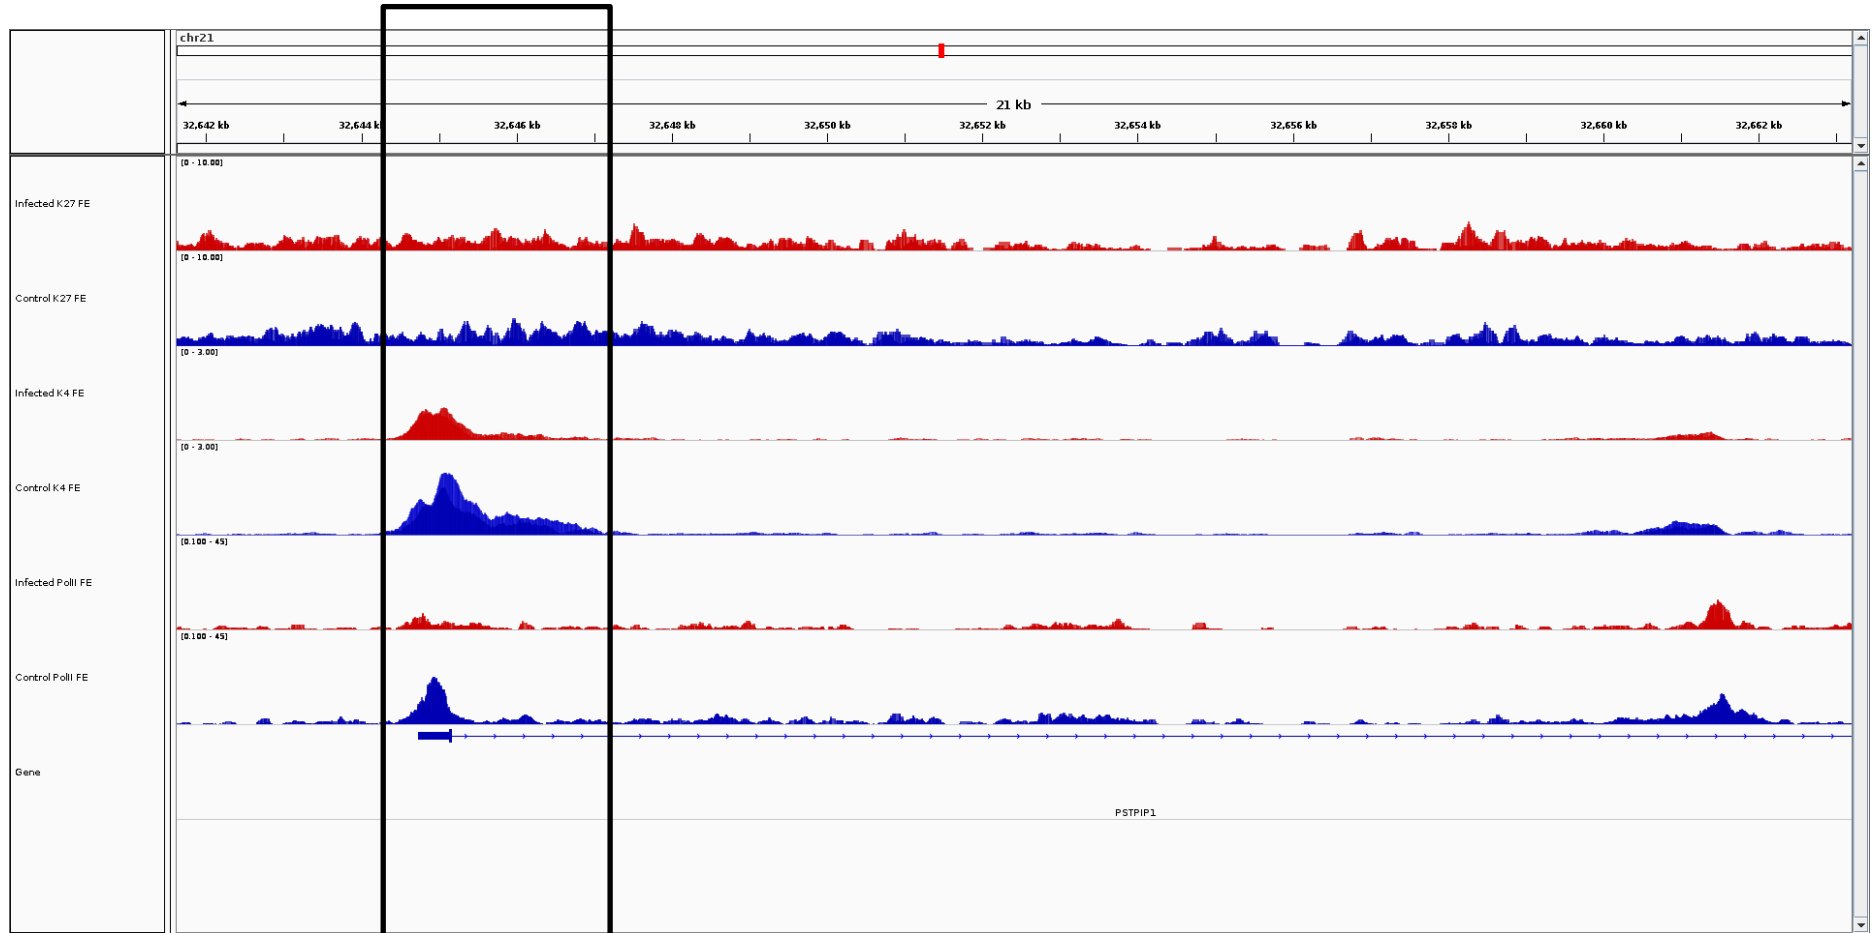

*PSTPIP1*

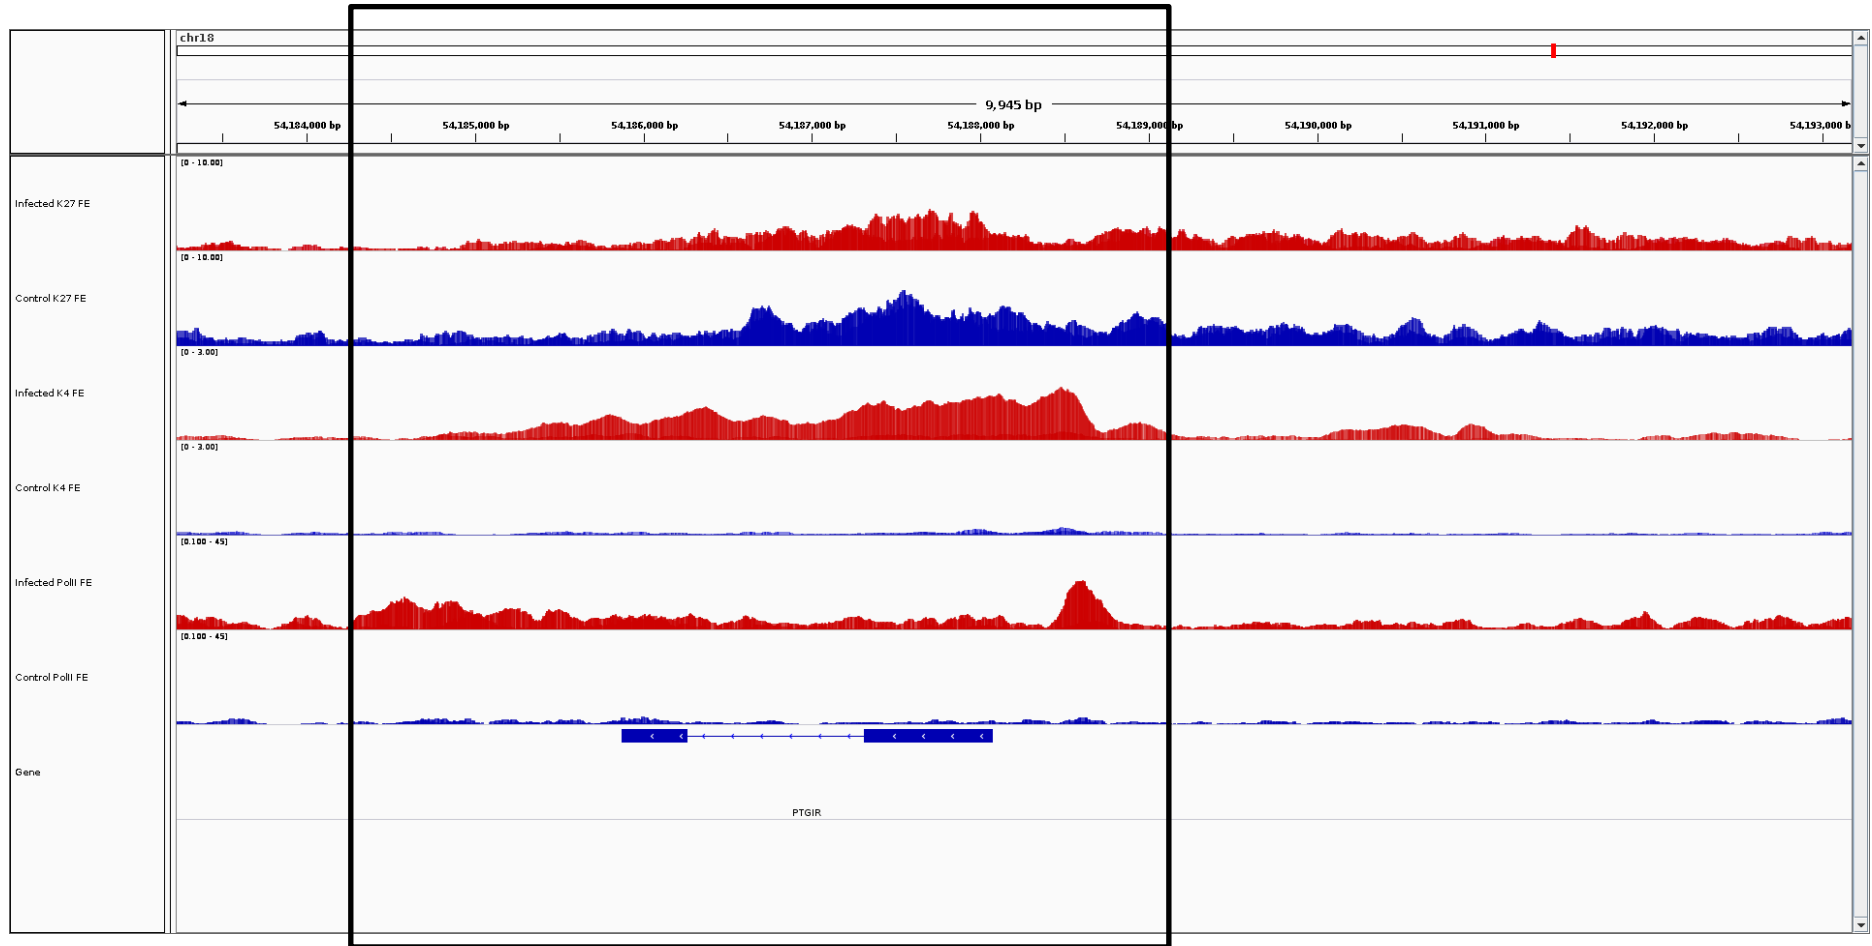

*PTGIR*

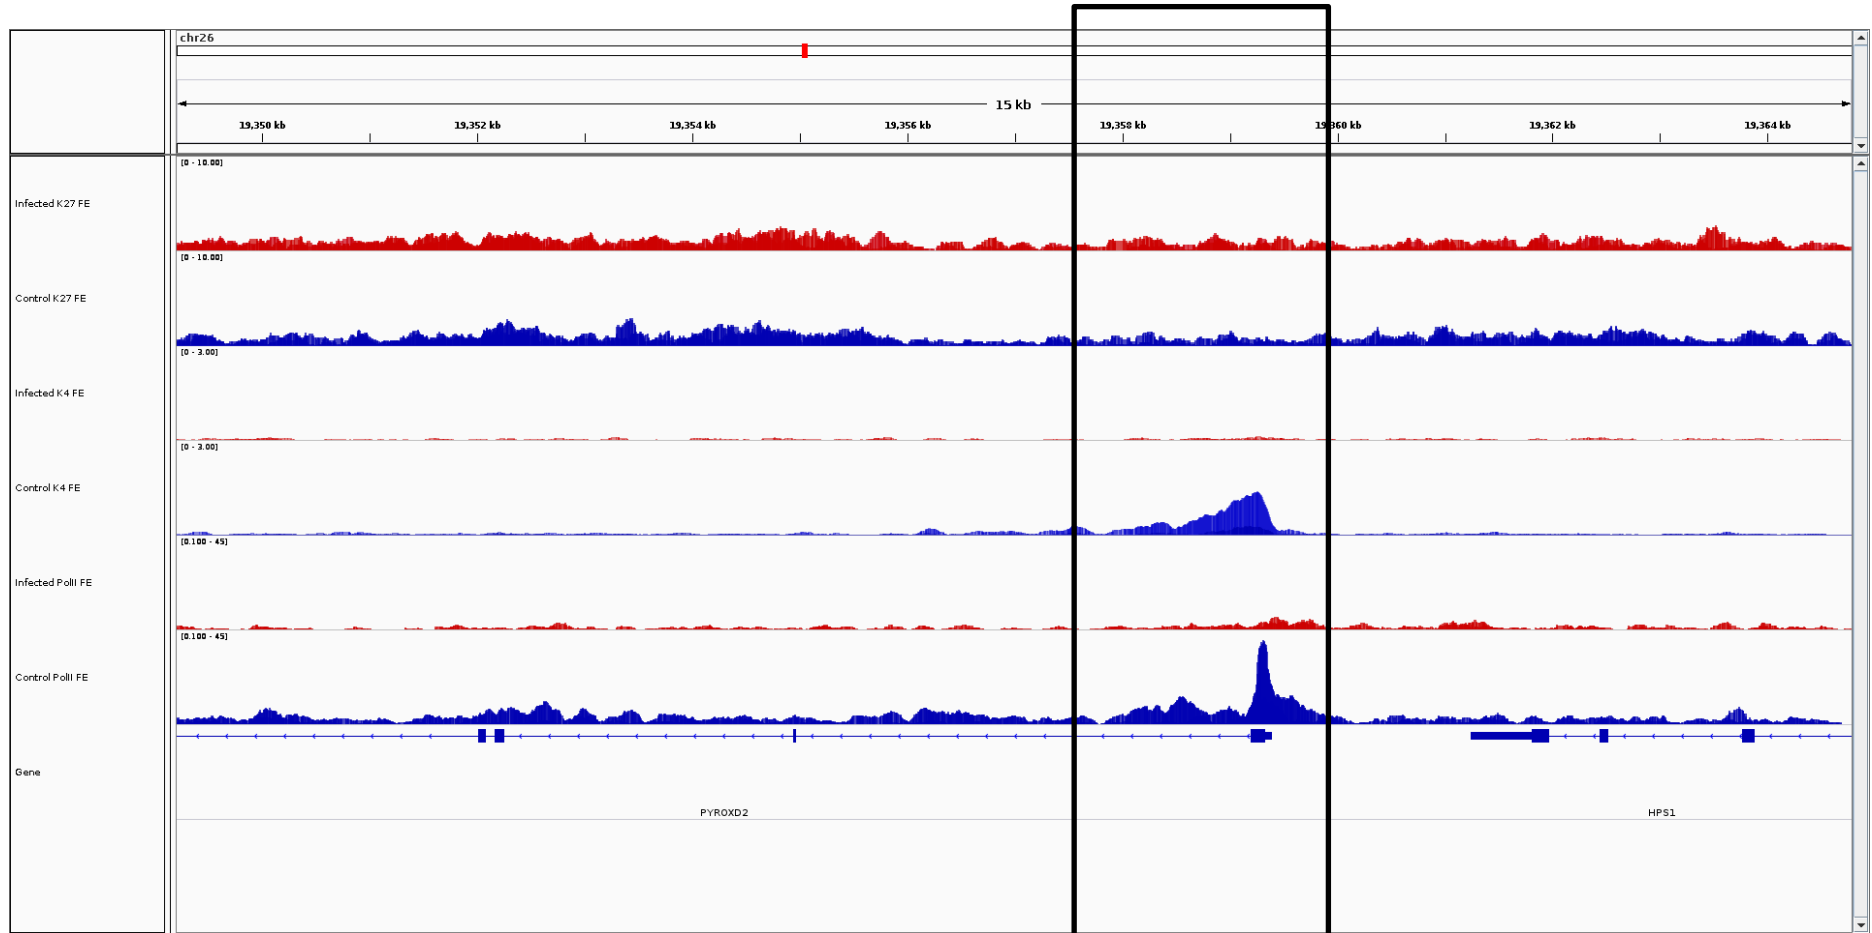

***PYROXD2***

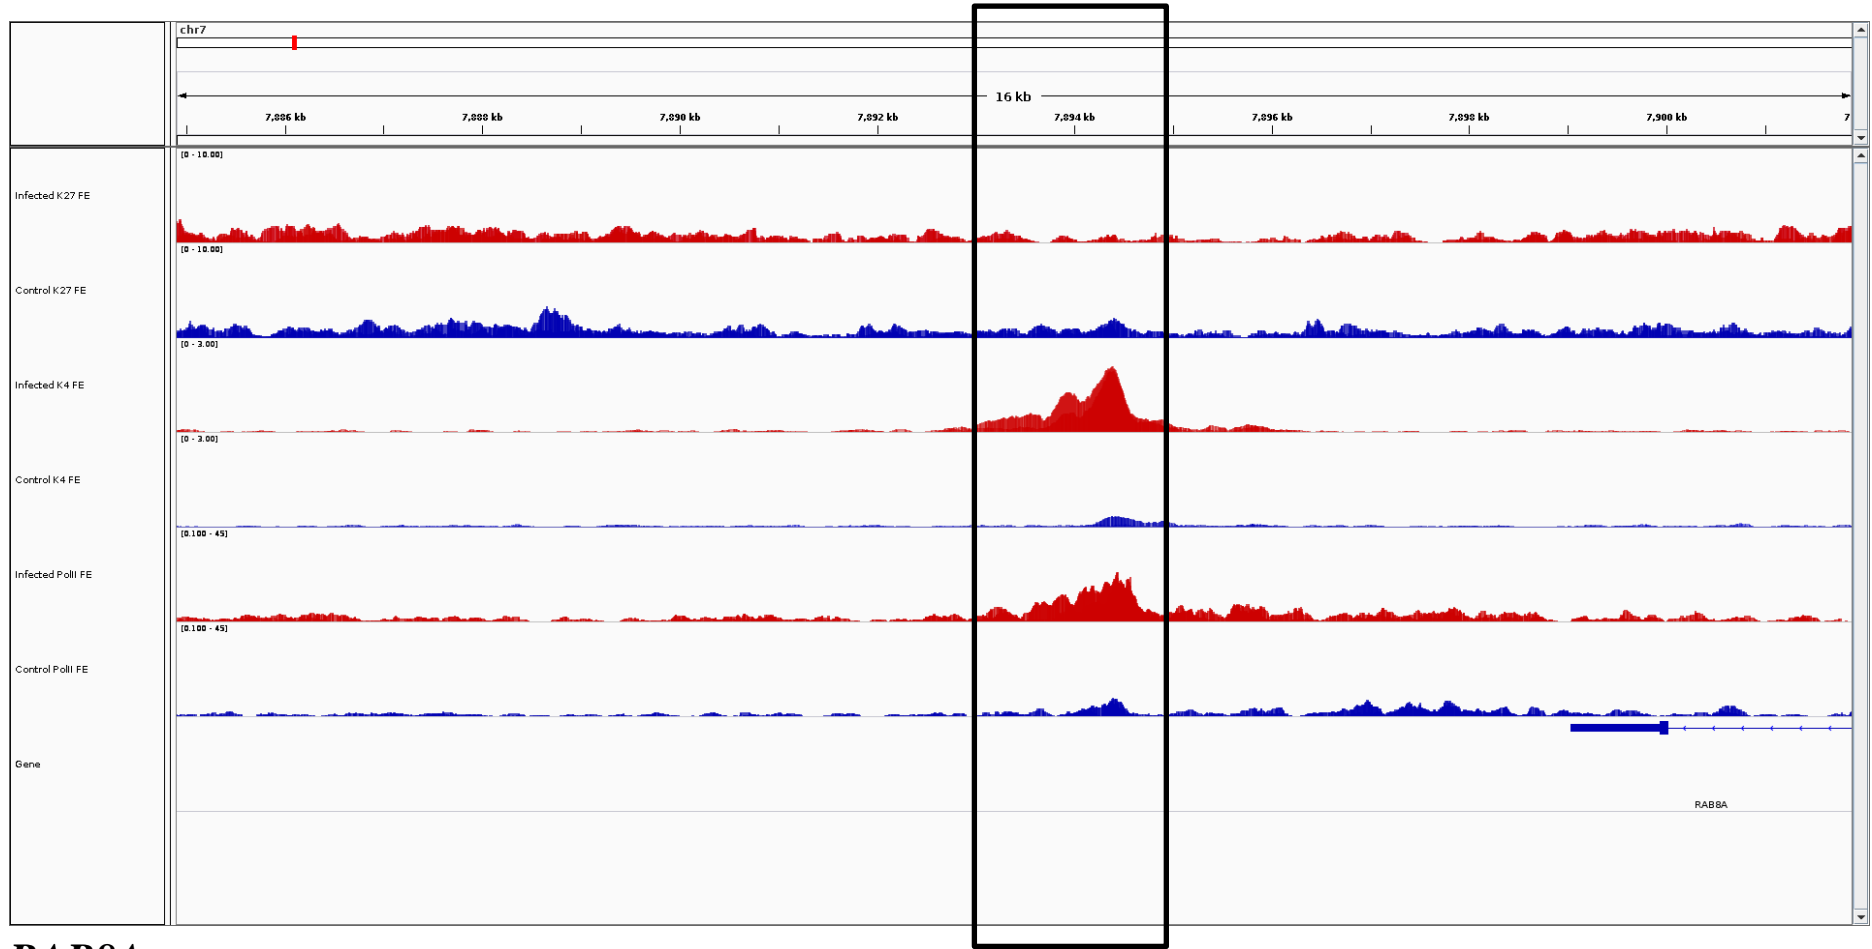

***RAB8A***

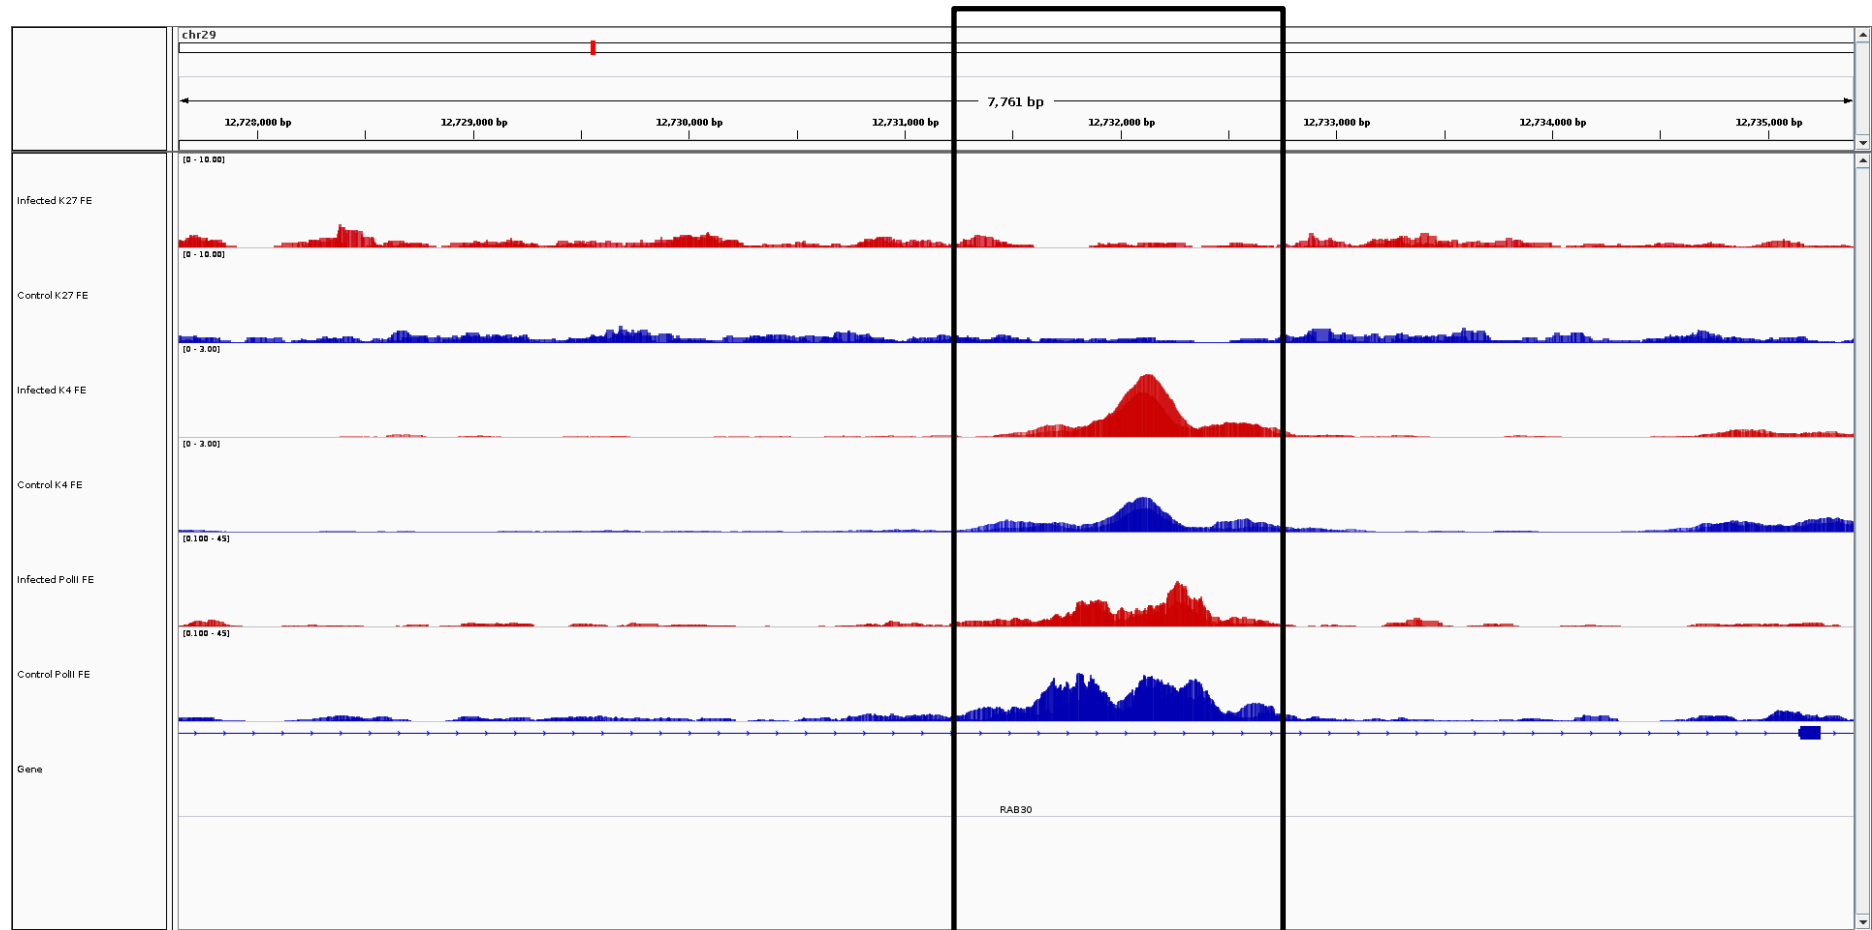

***RAB30***

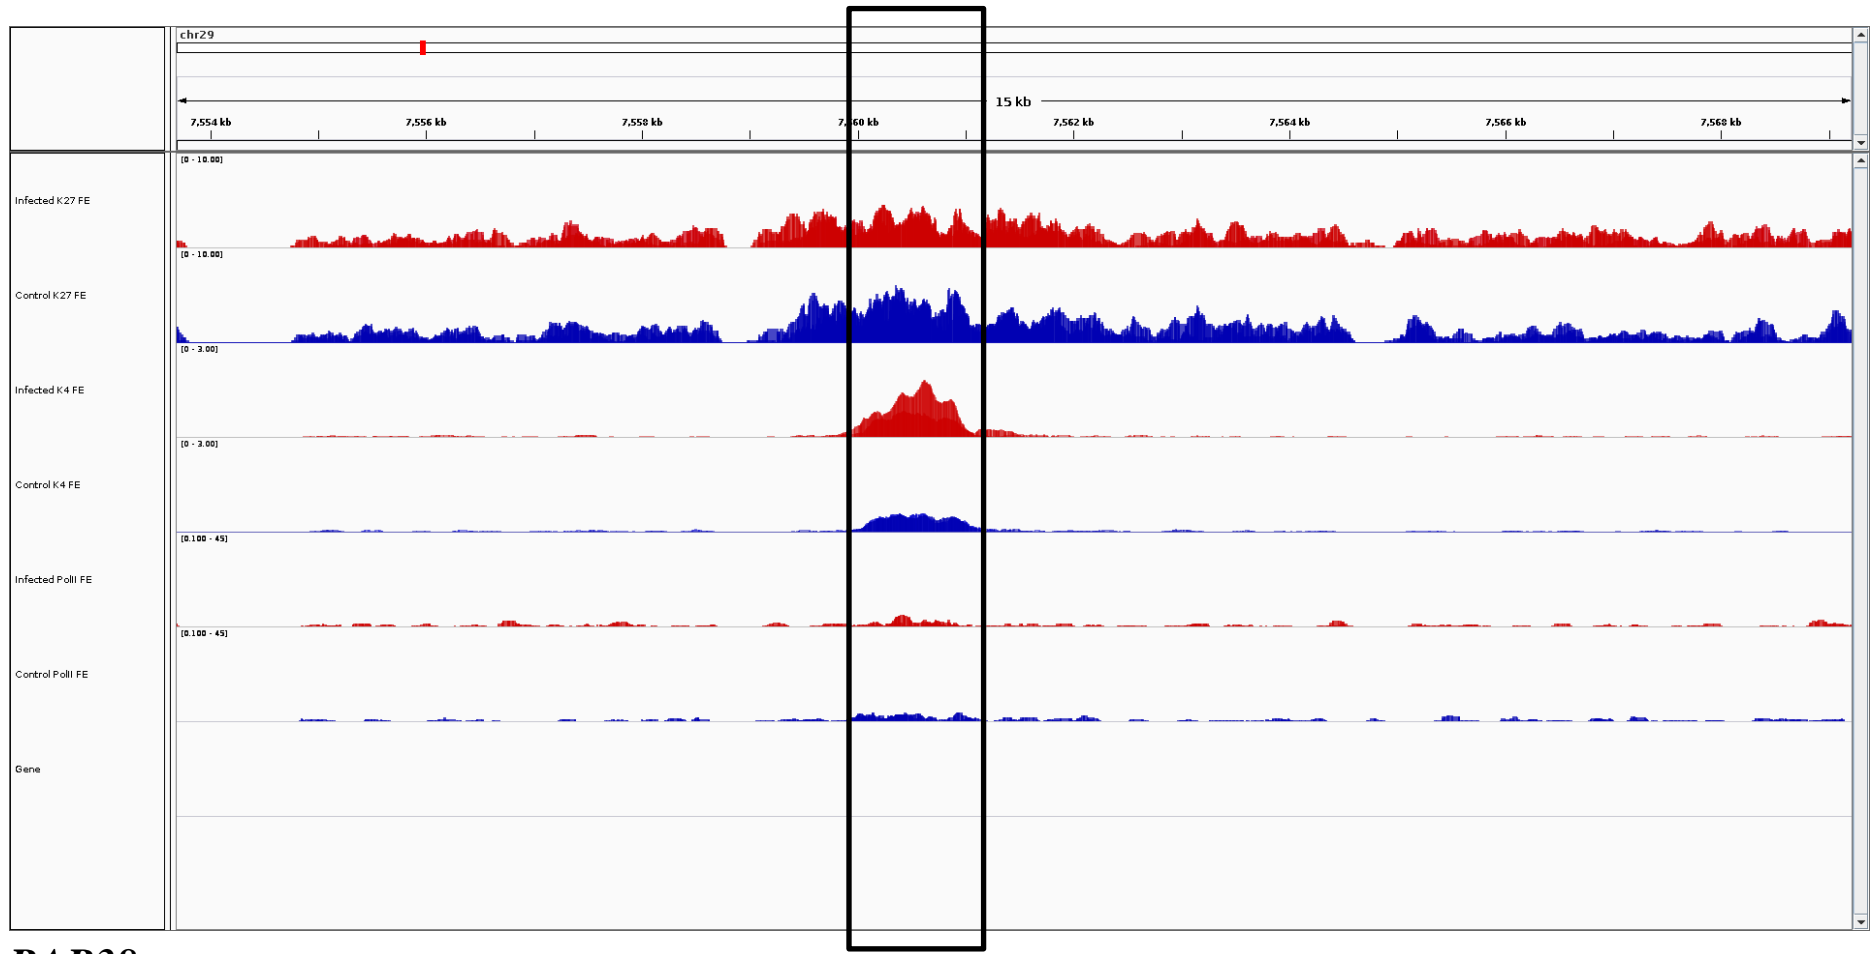

***RAB38***

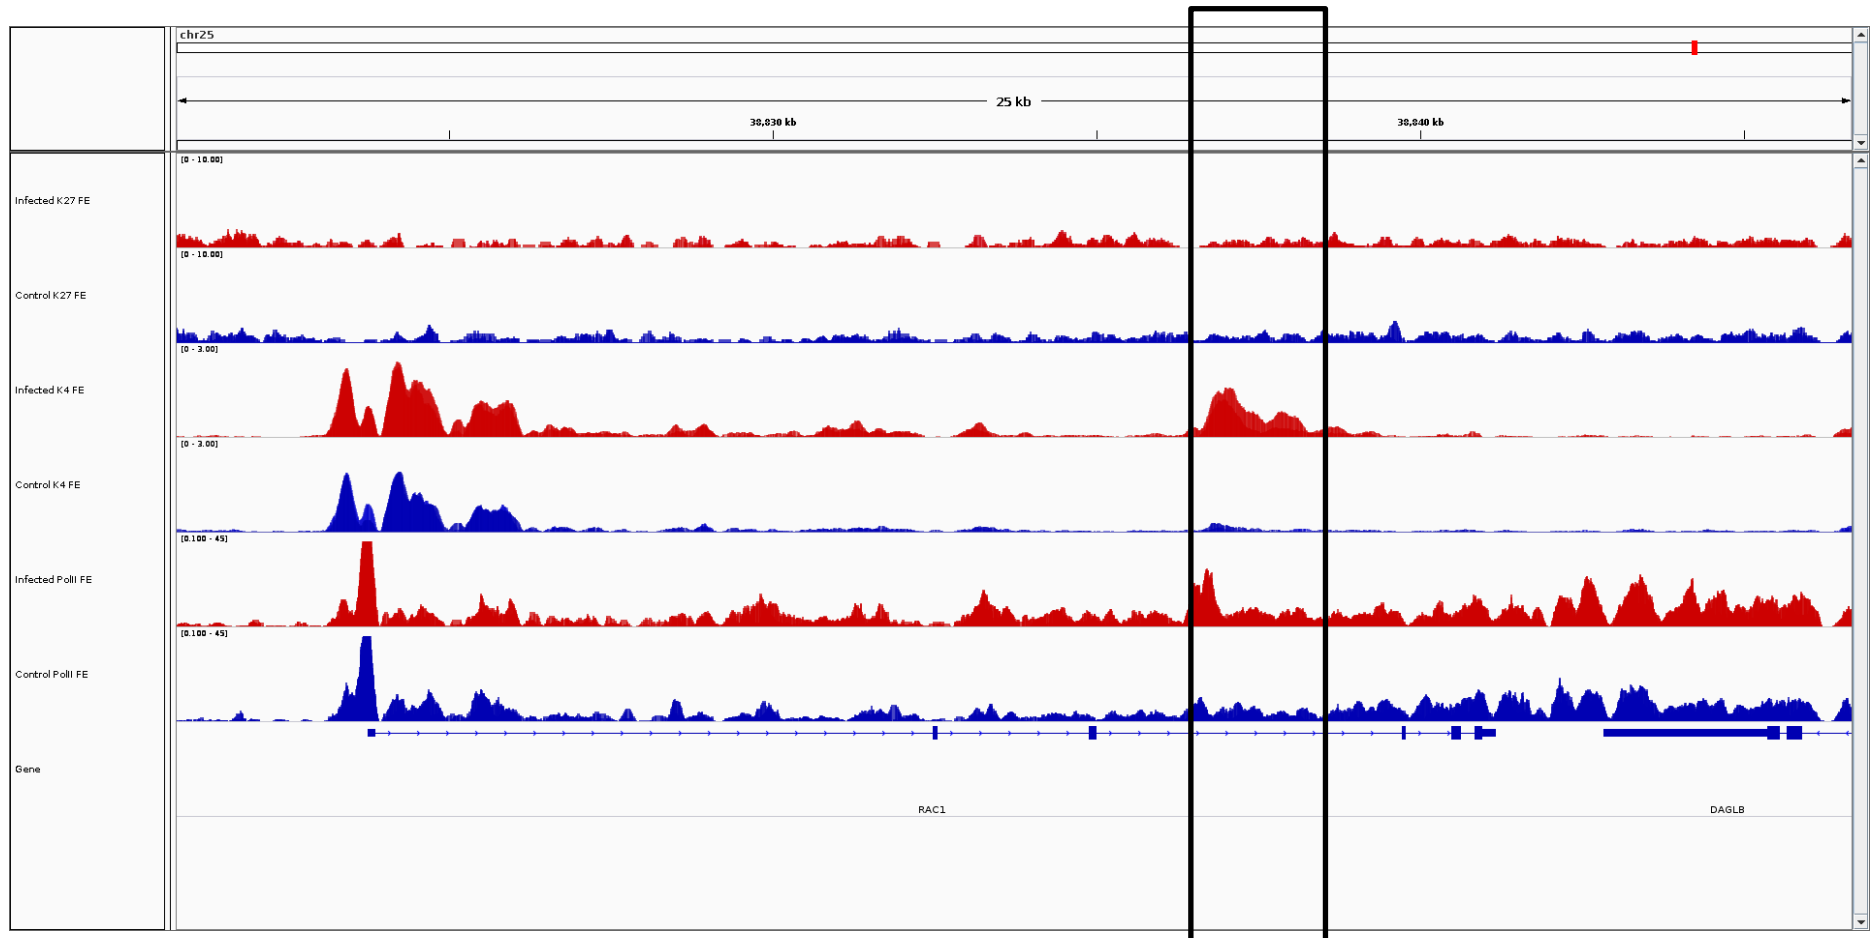

*RAC1*

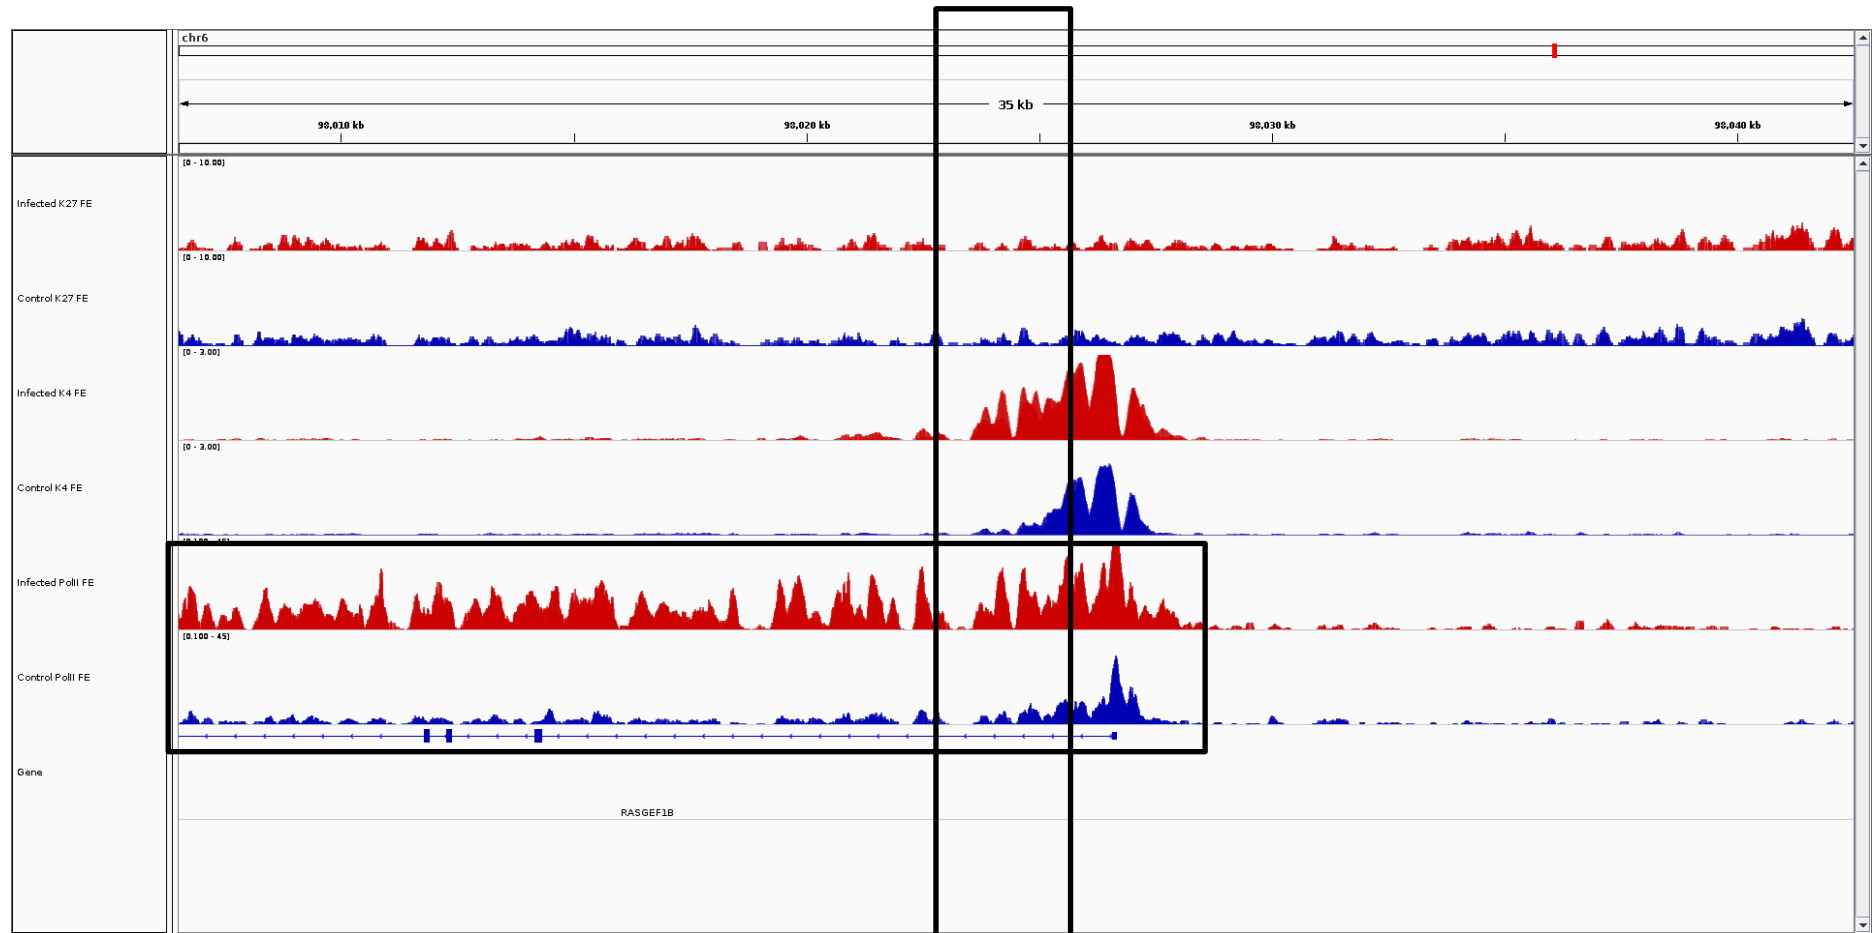

***RASGEF1B***



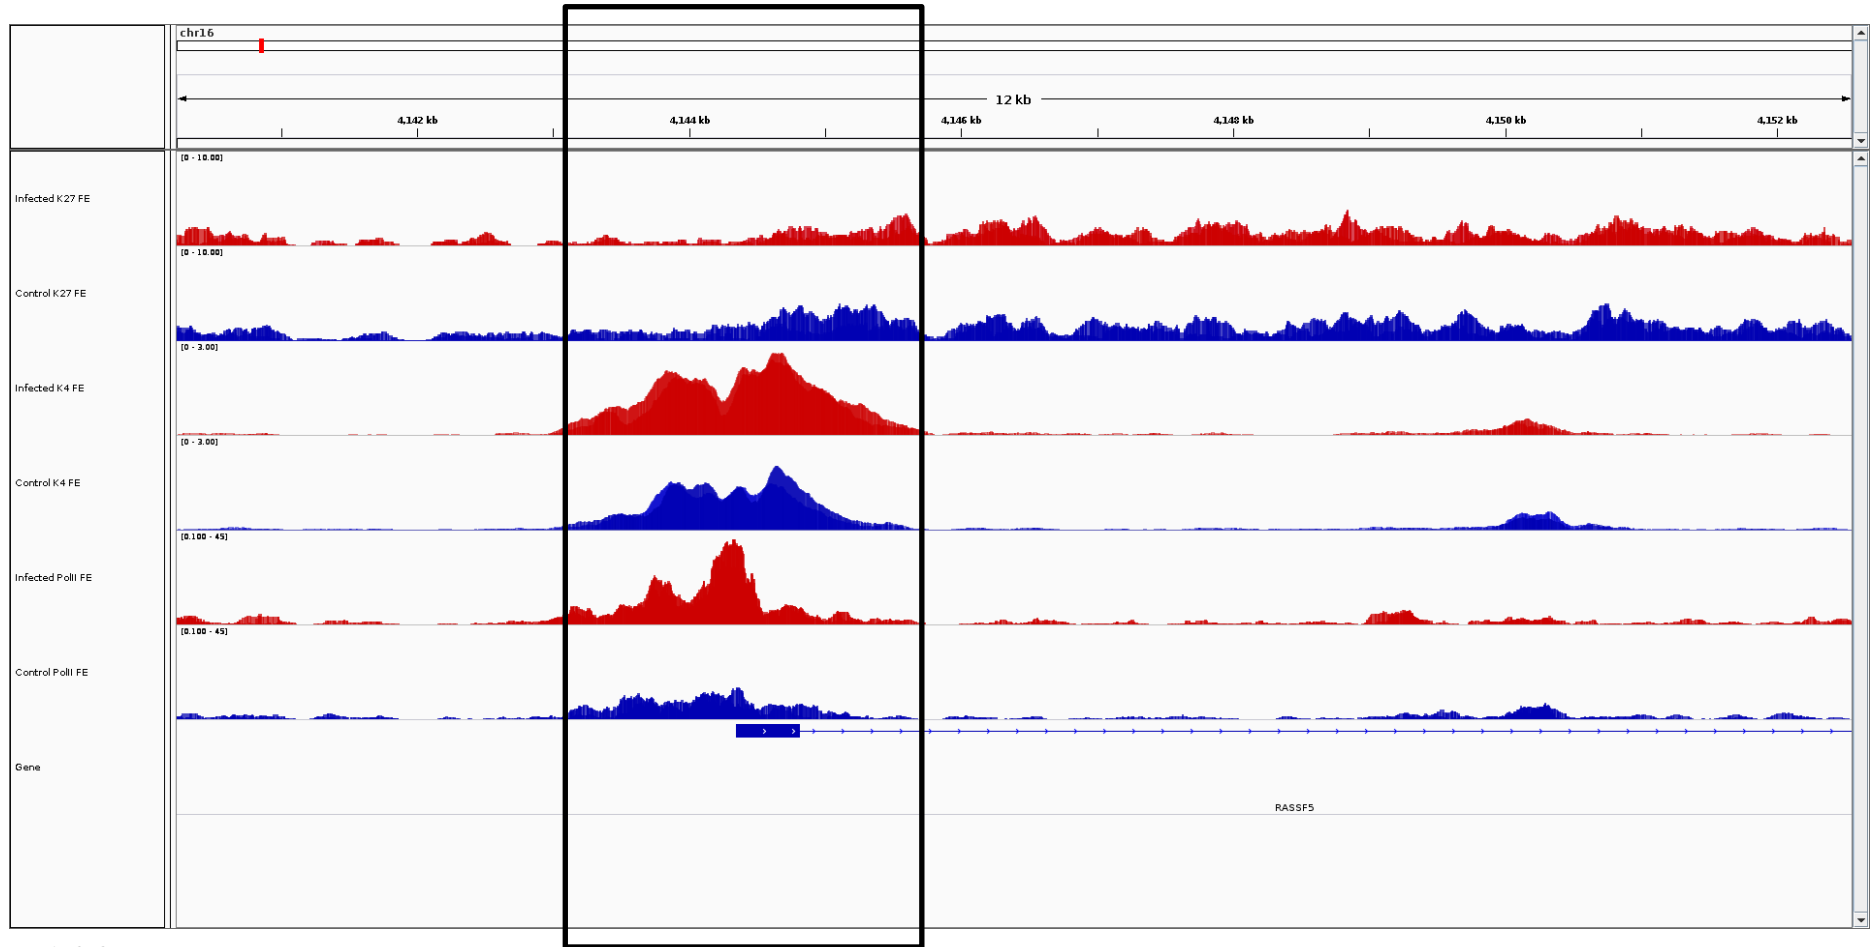

***RASSF5***

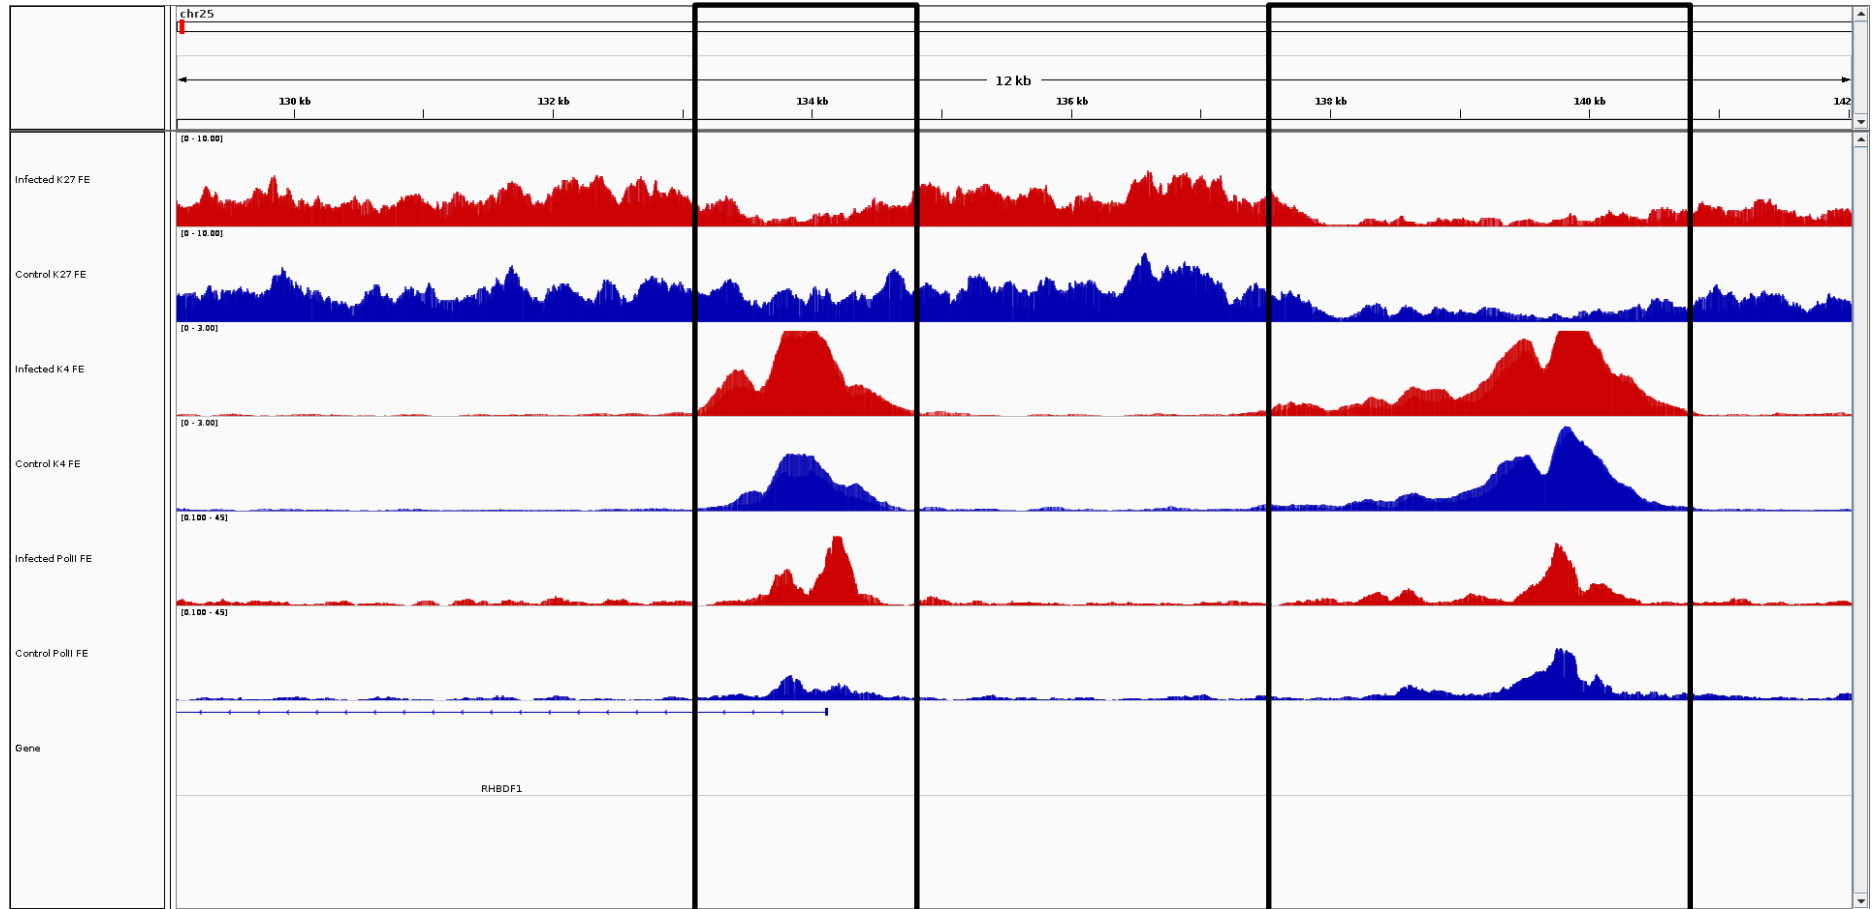

***RHBDF1***

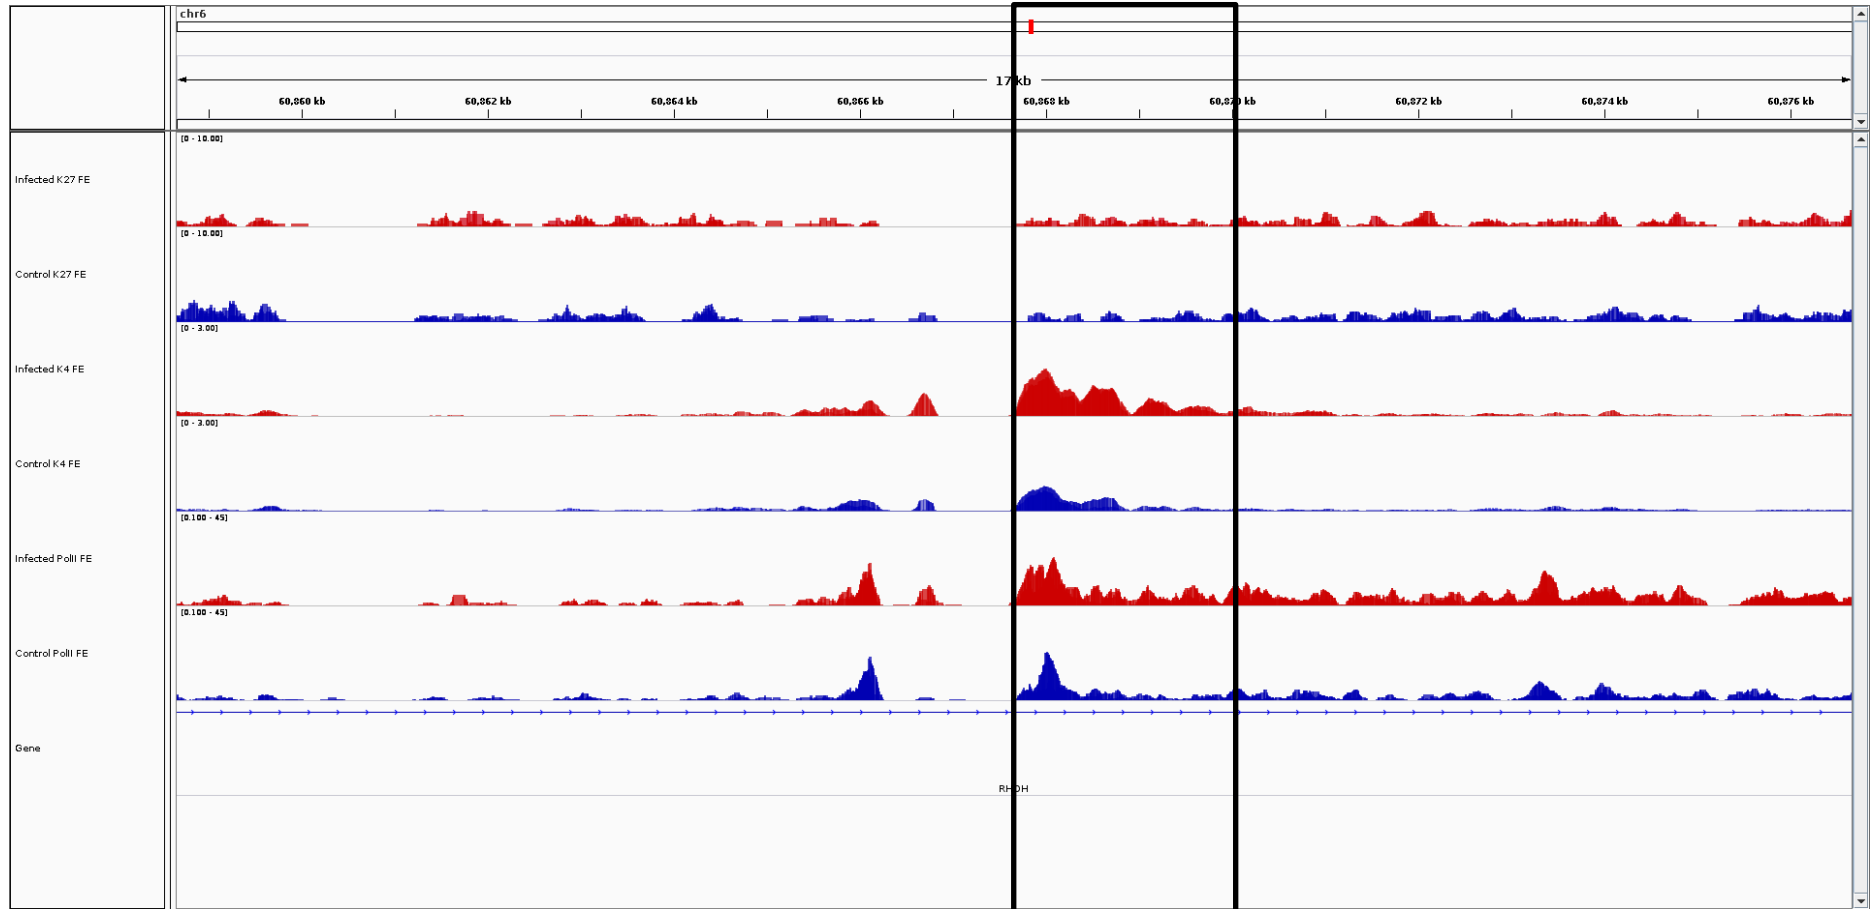

*RHOH*

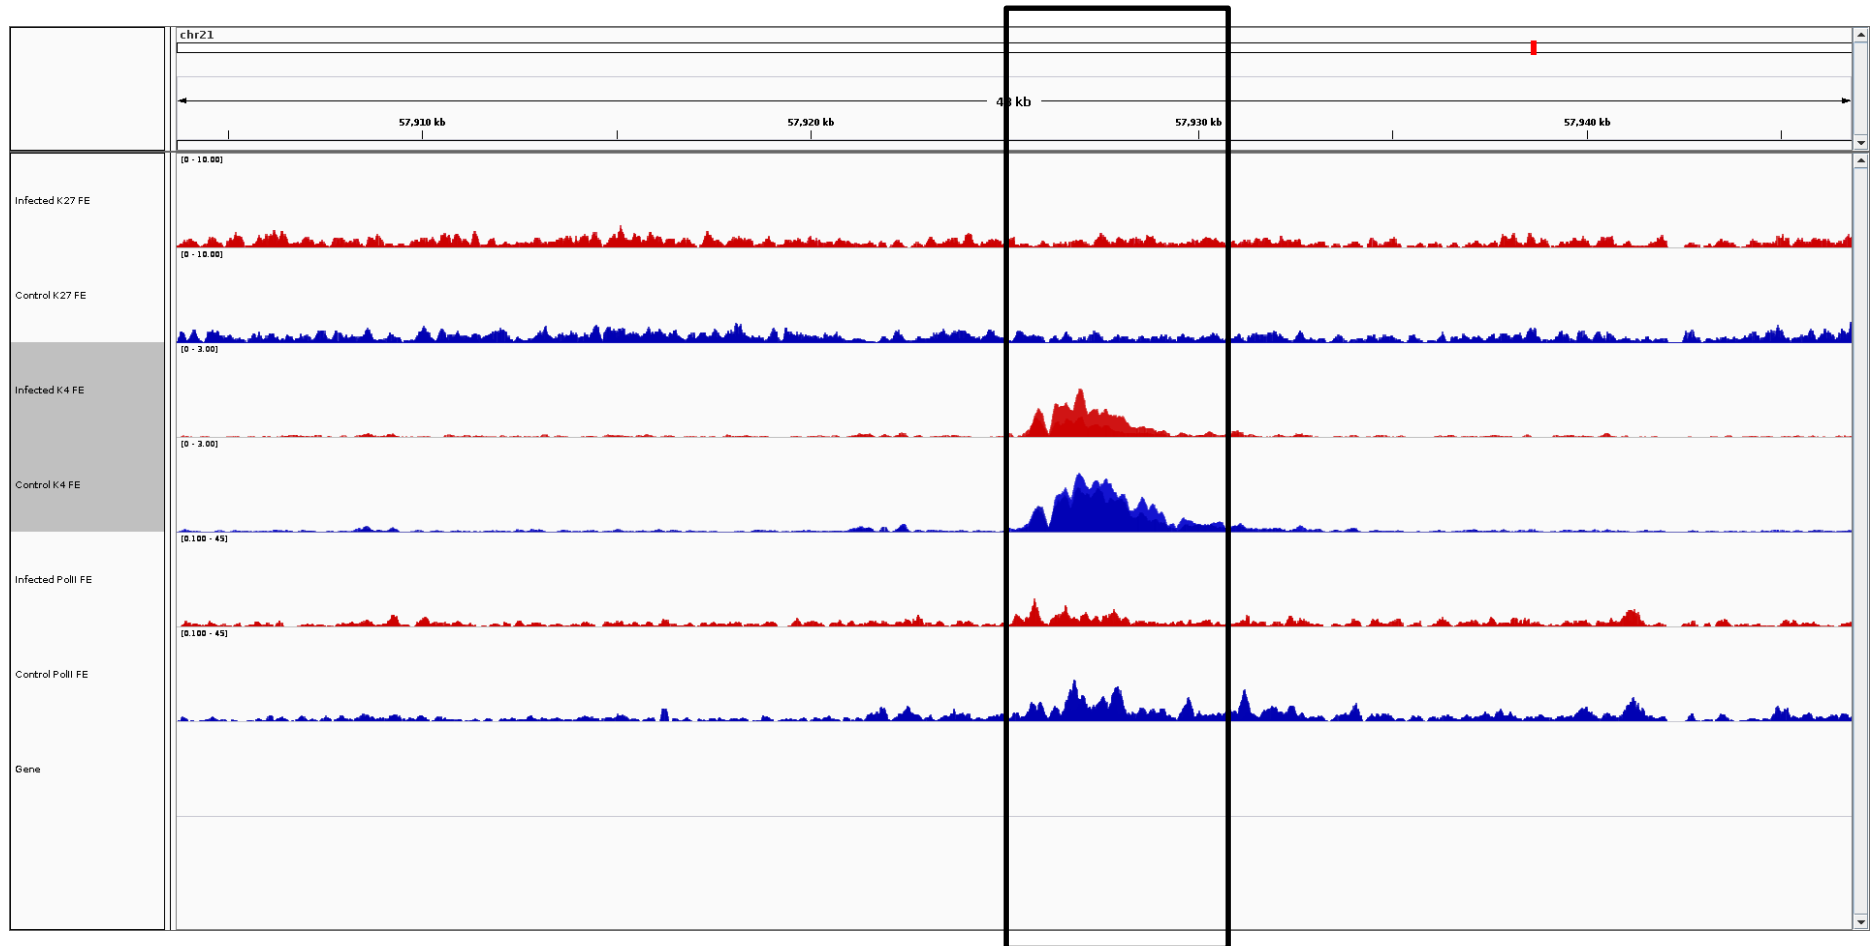

*RIN3*

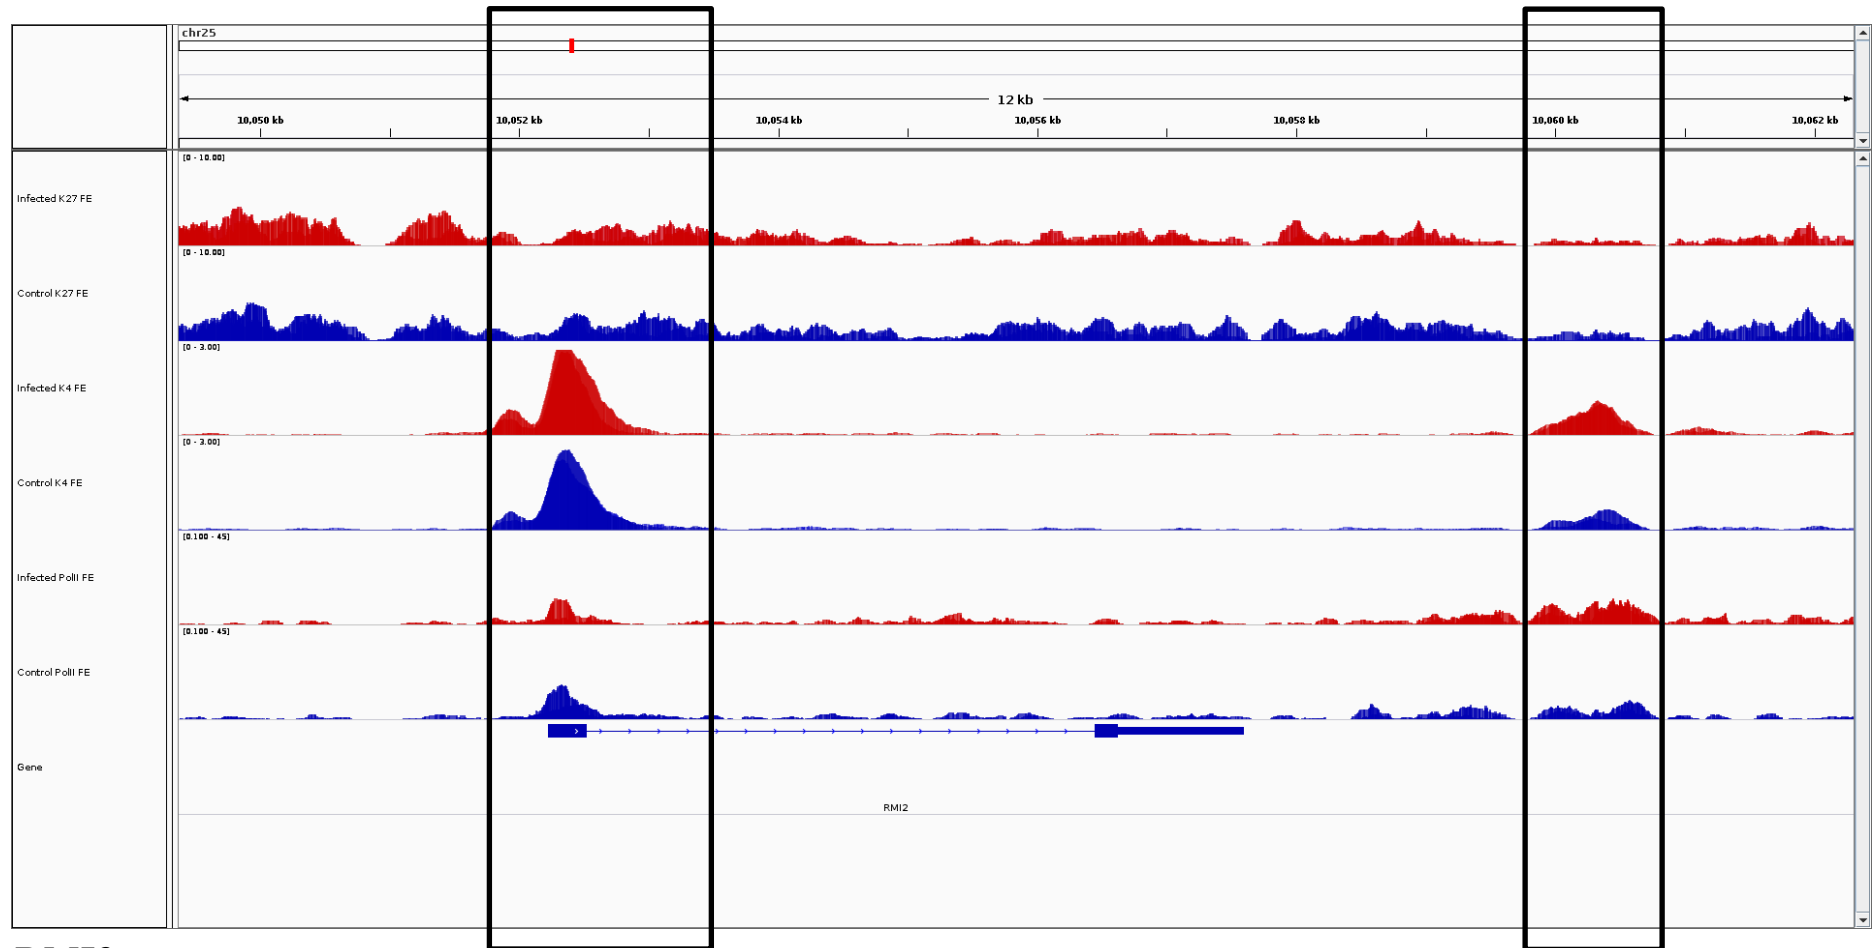

*RMI2*

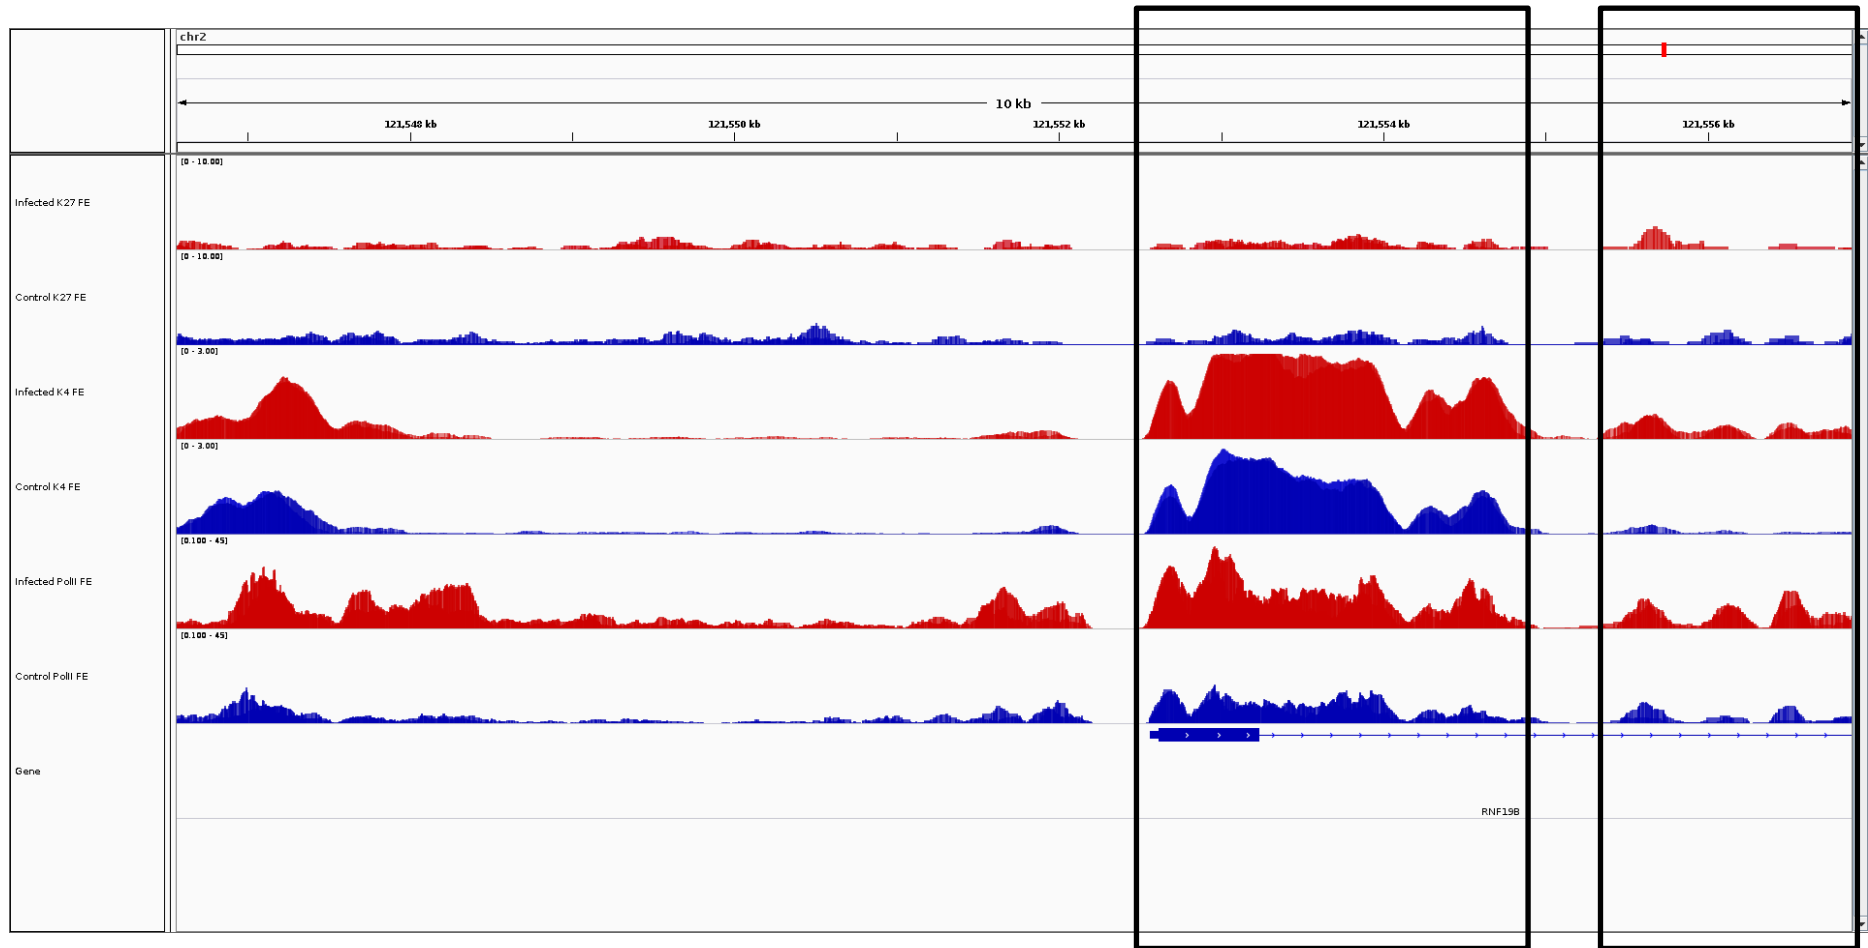

***RNF19B***

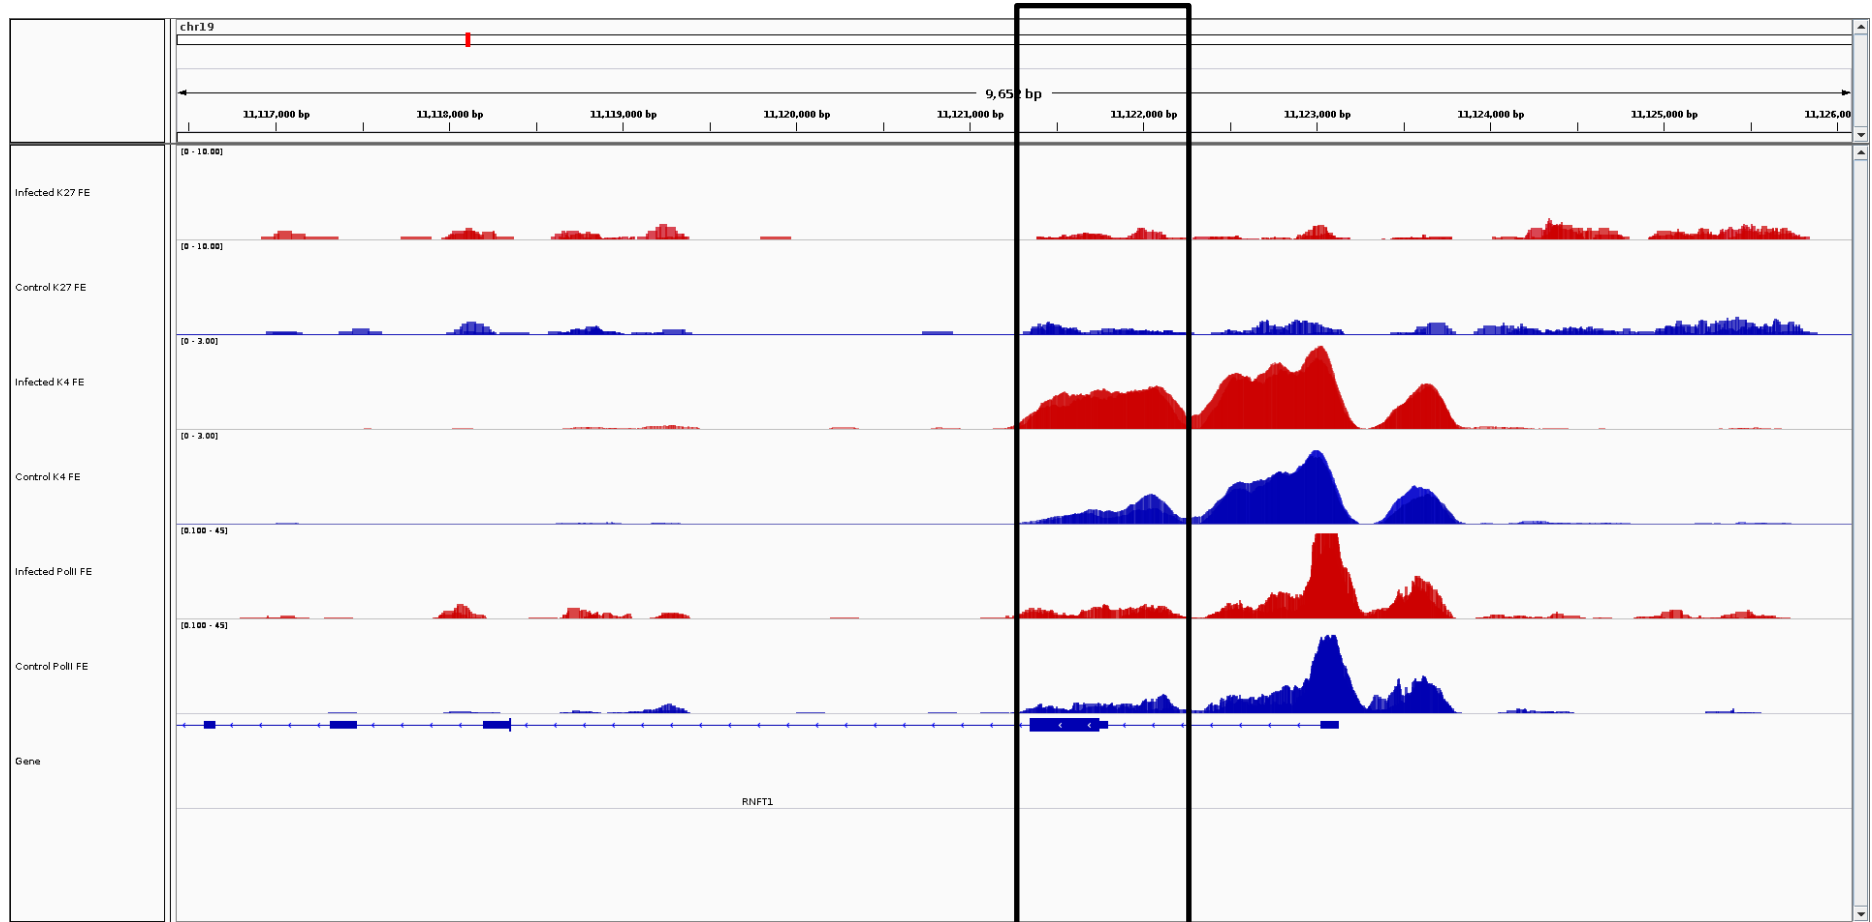

***RNFT1***

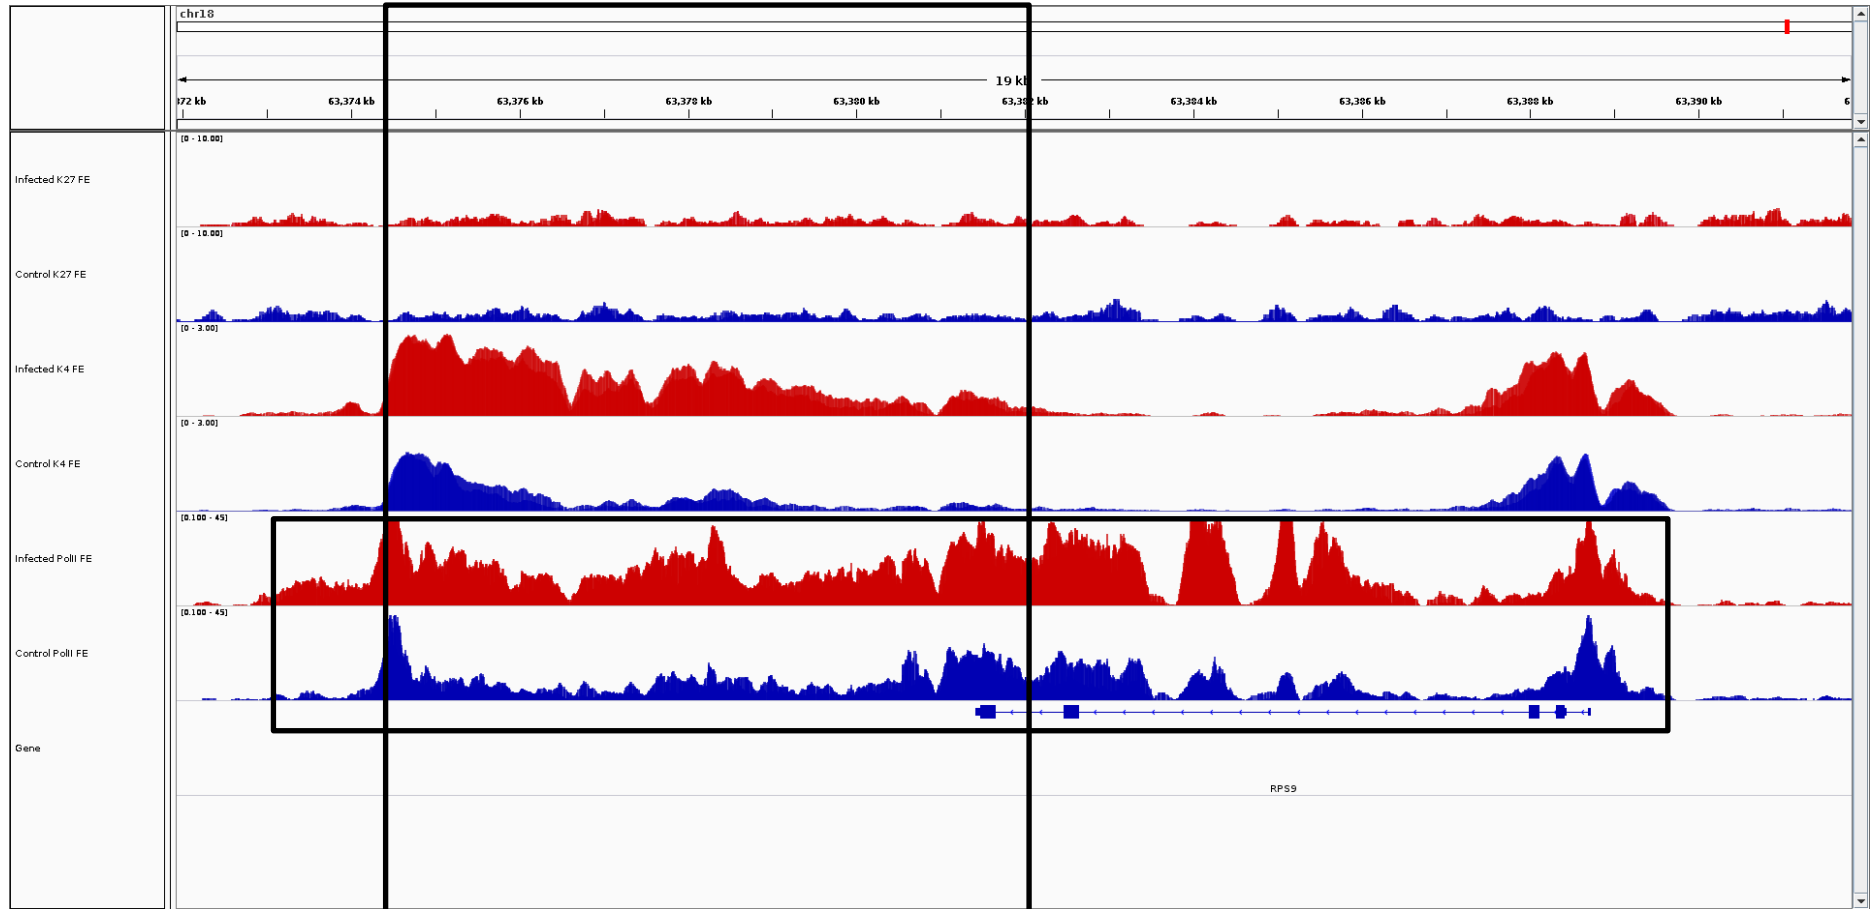

***RPS9***



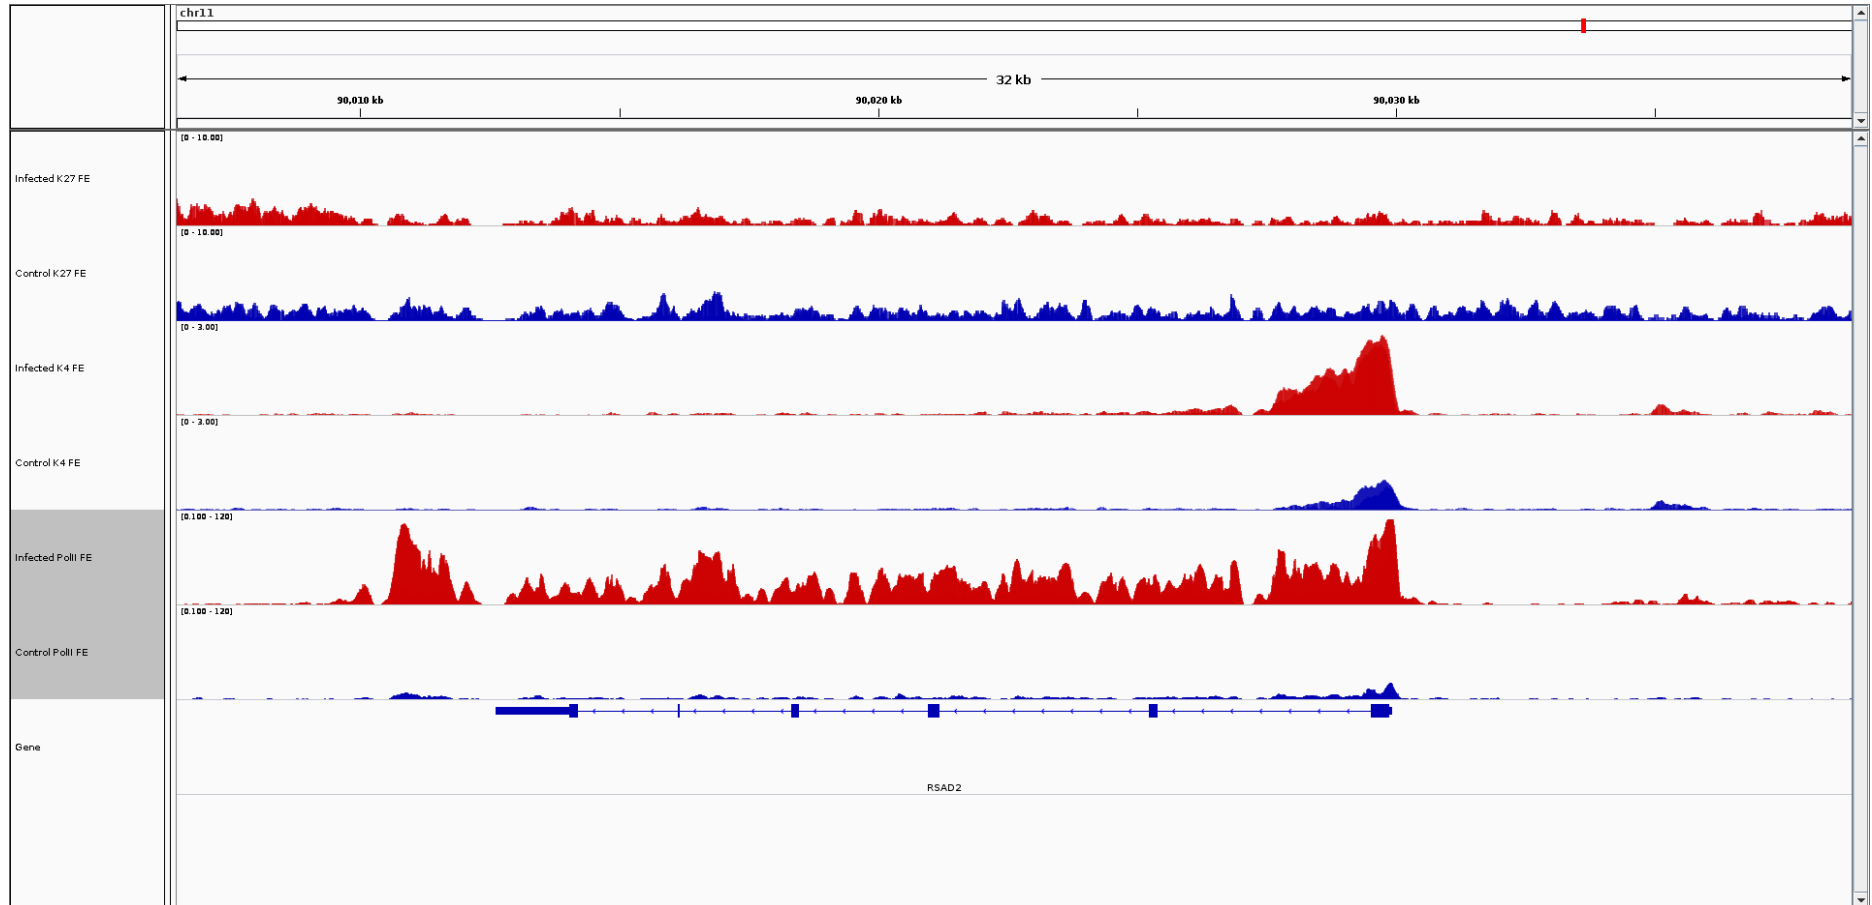

***RSAD2***

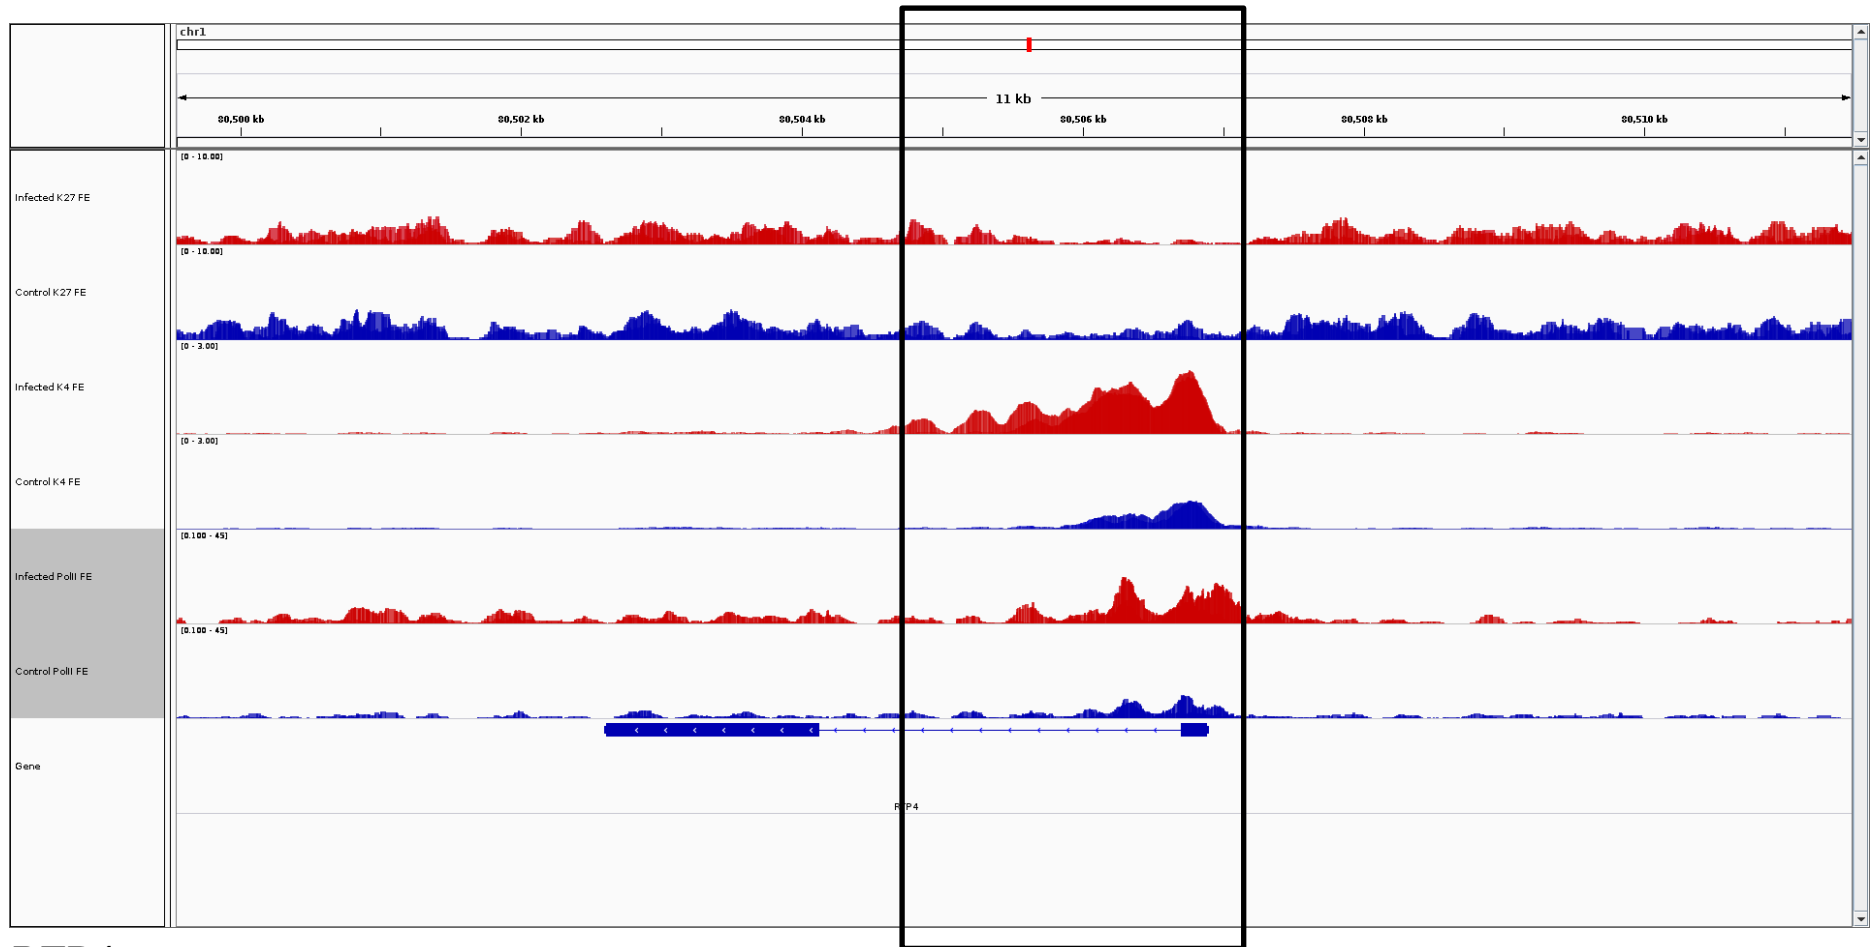

***RTP4***

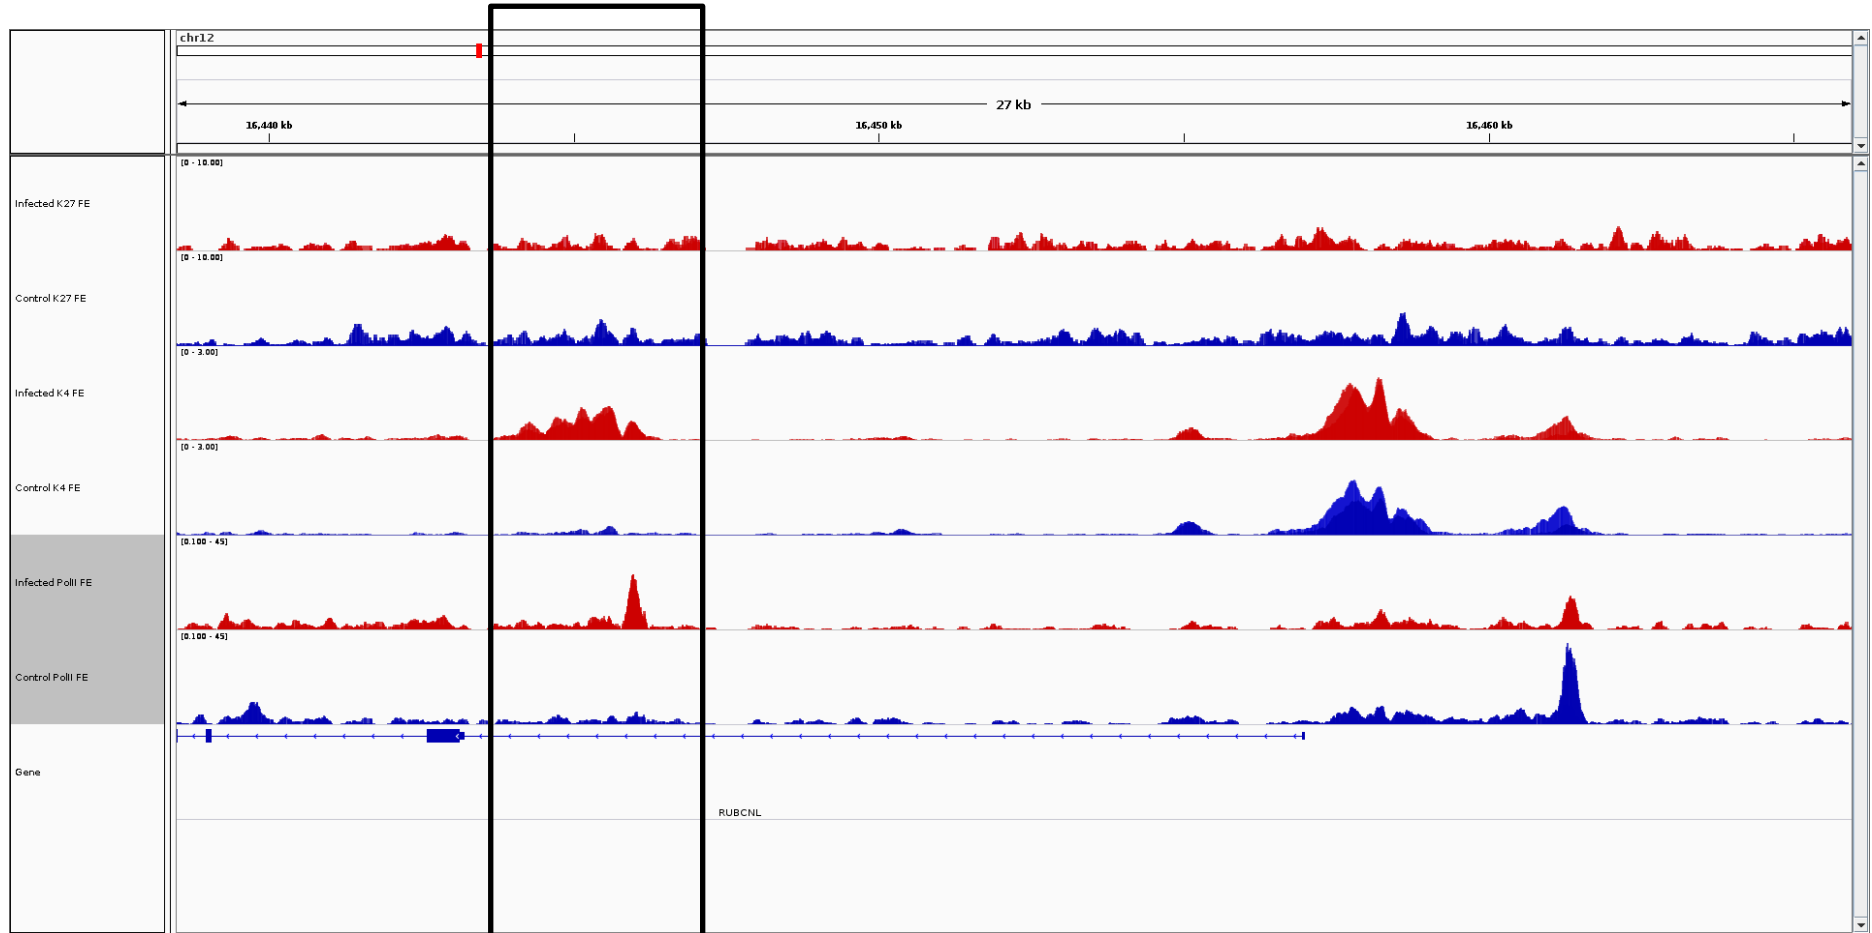

*RUBCNL*

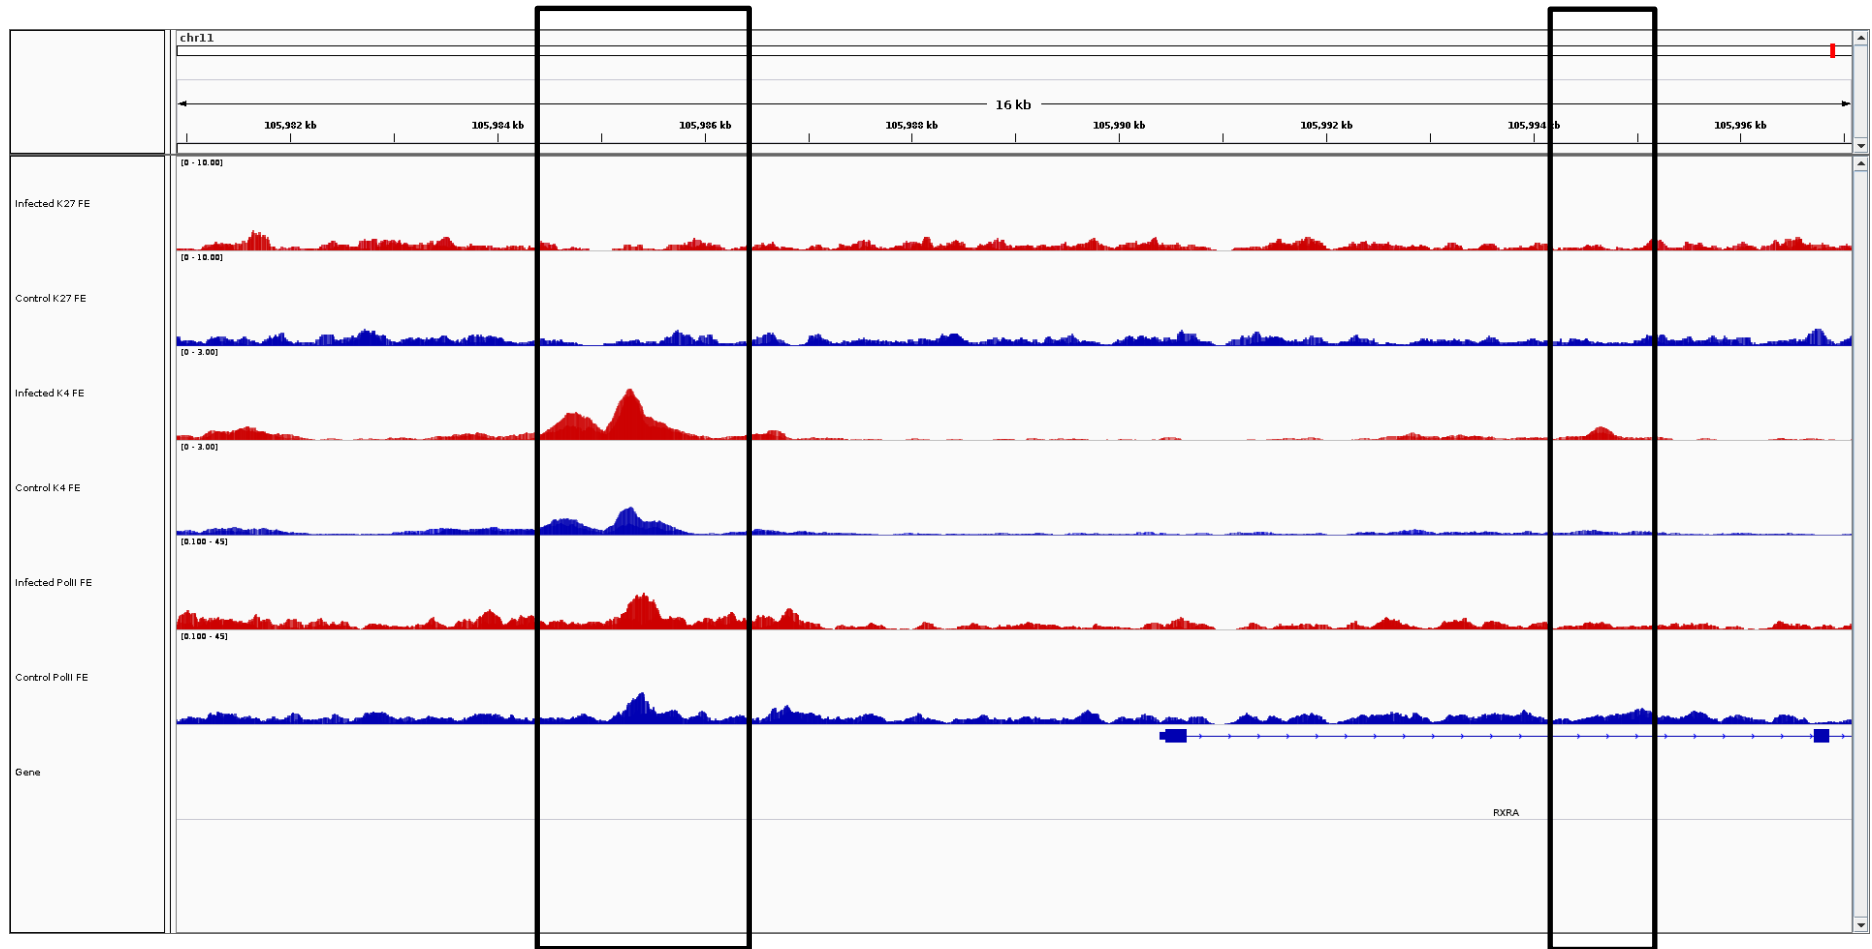

***RXRA***

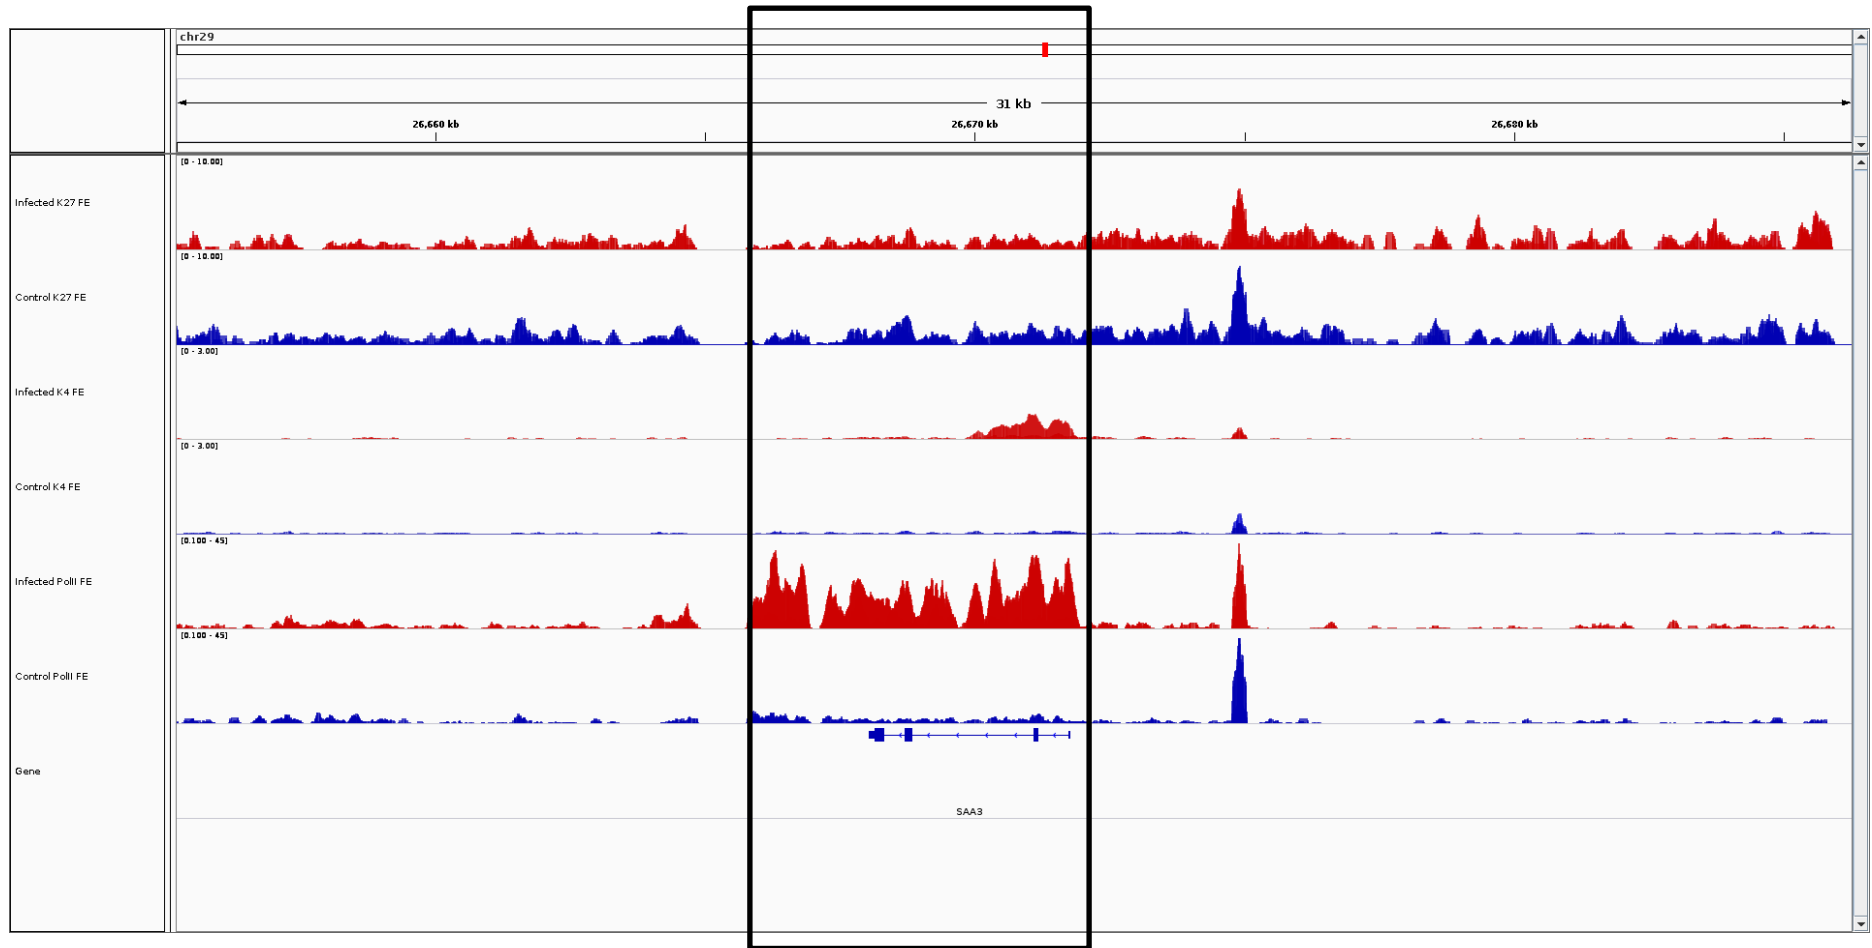

**SAA3**

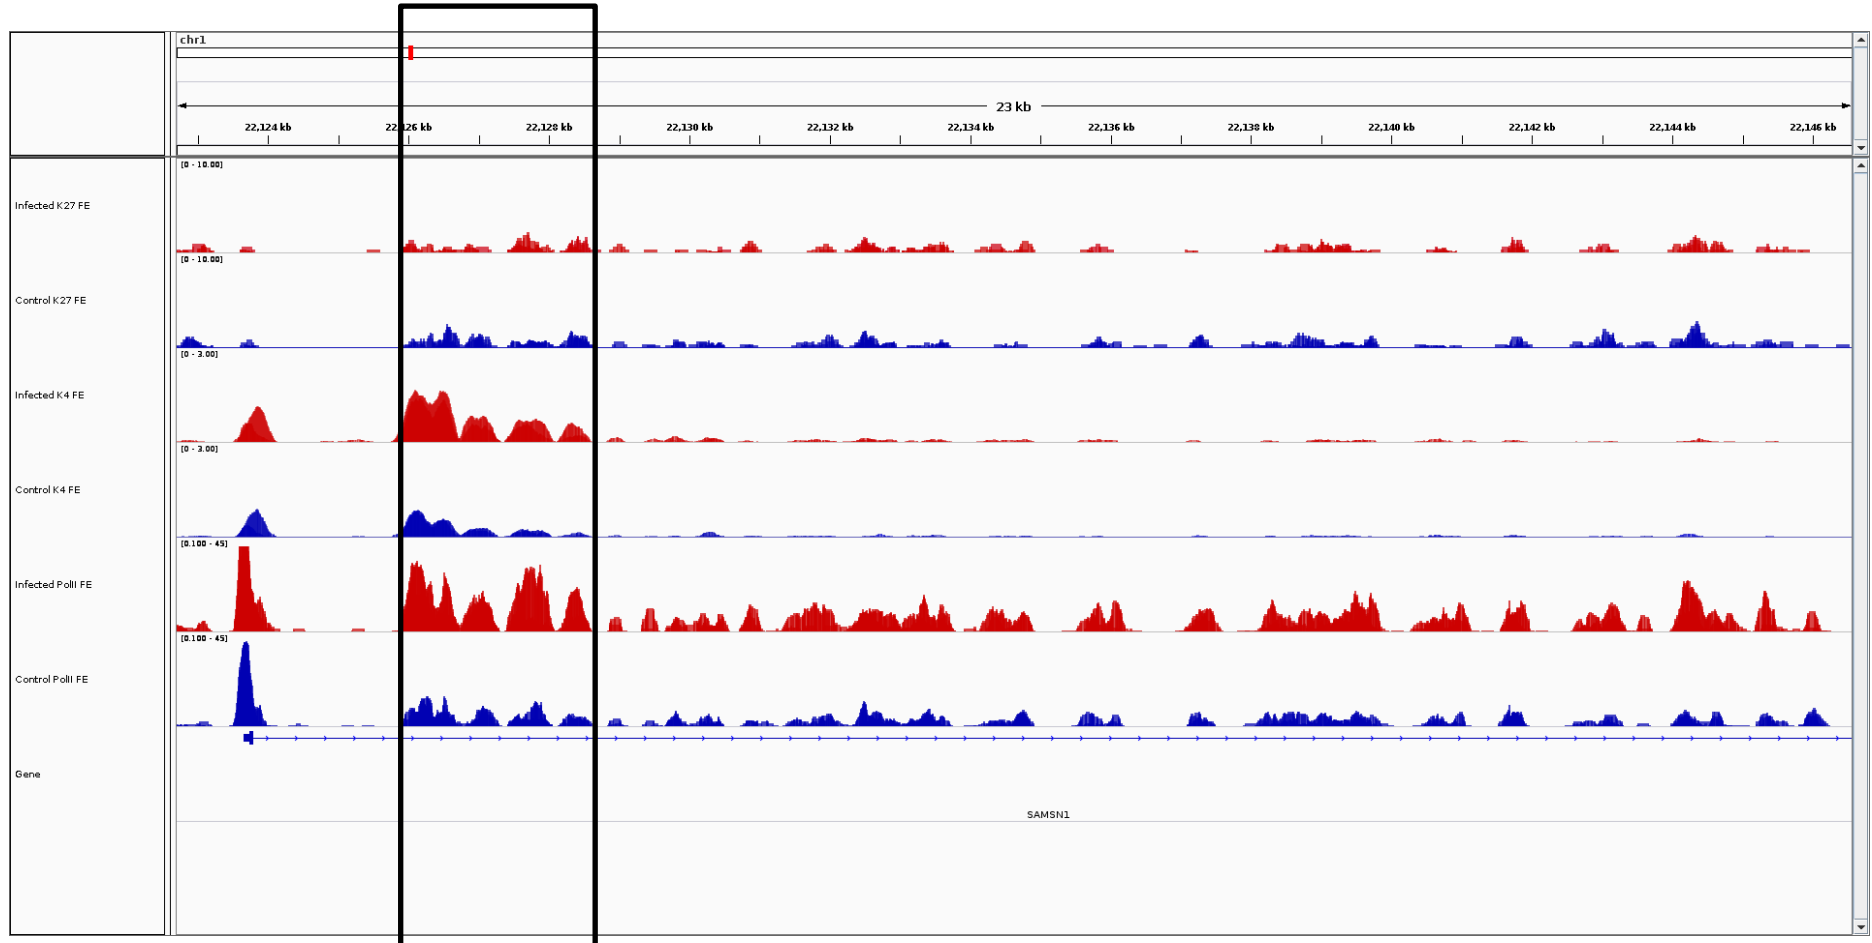

***SAMSNI***

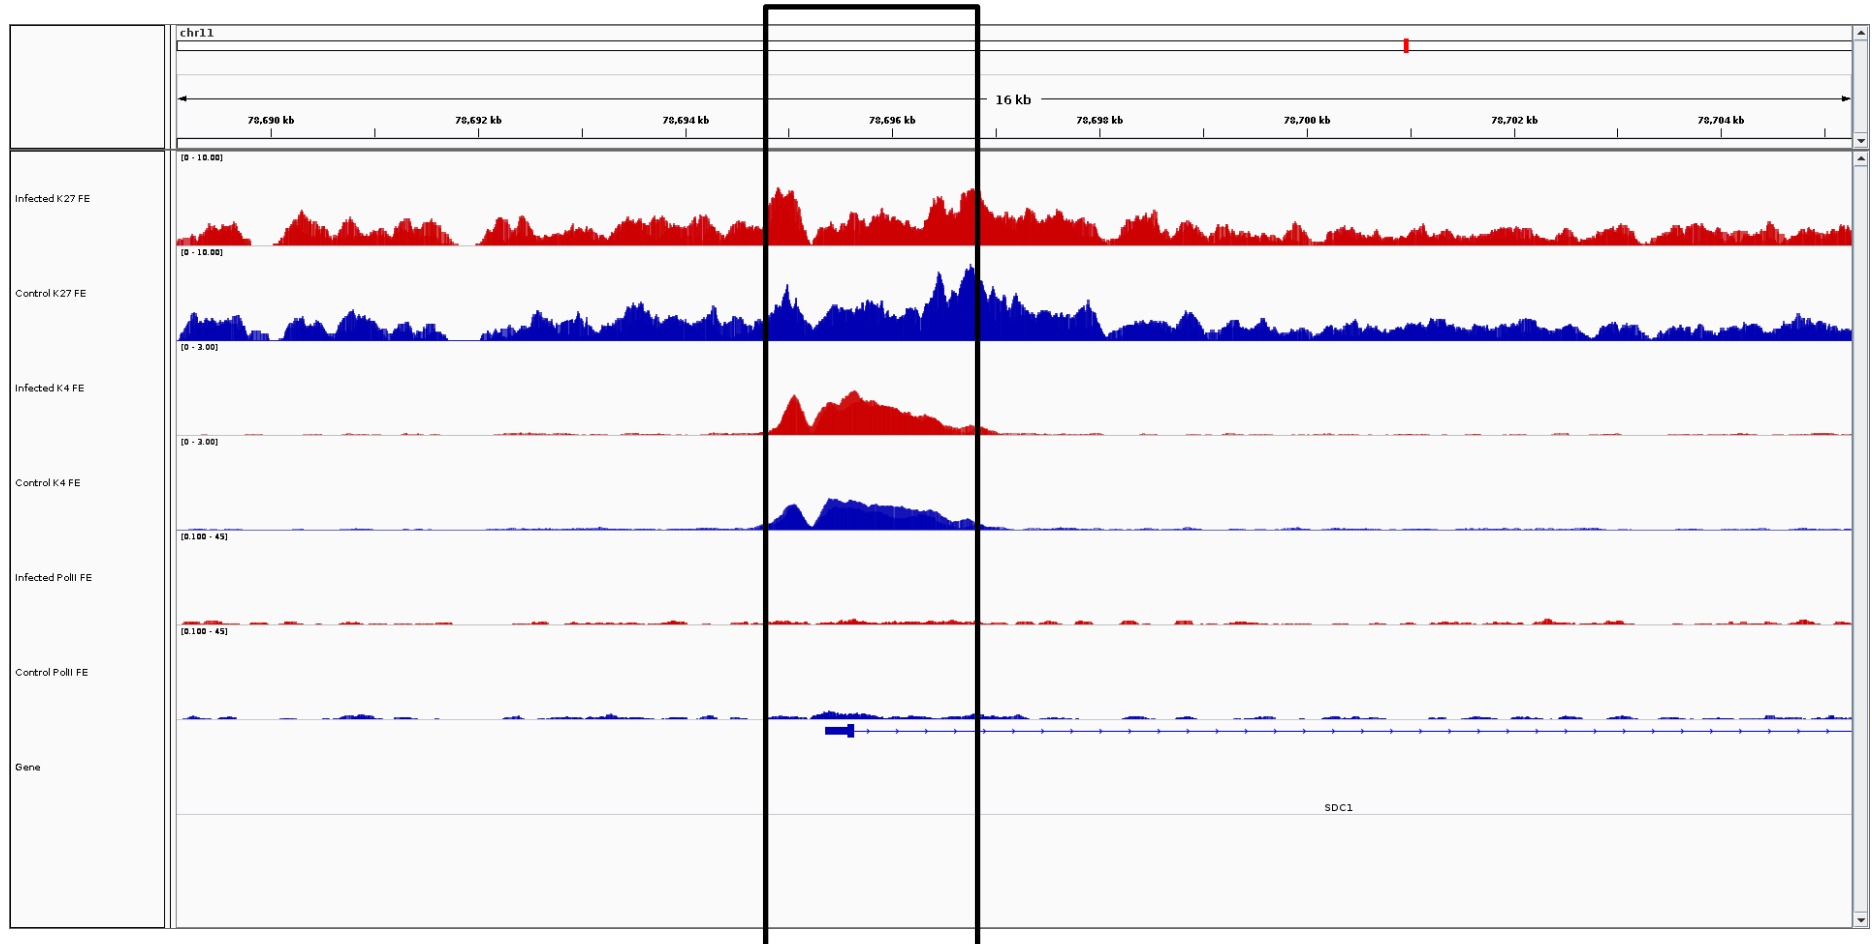

***SDC1***

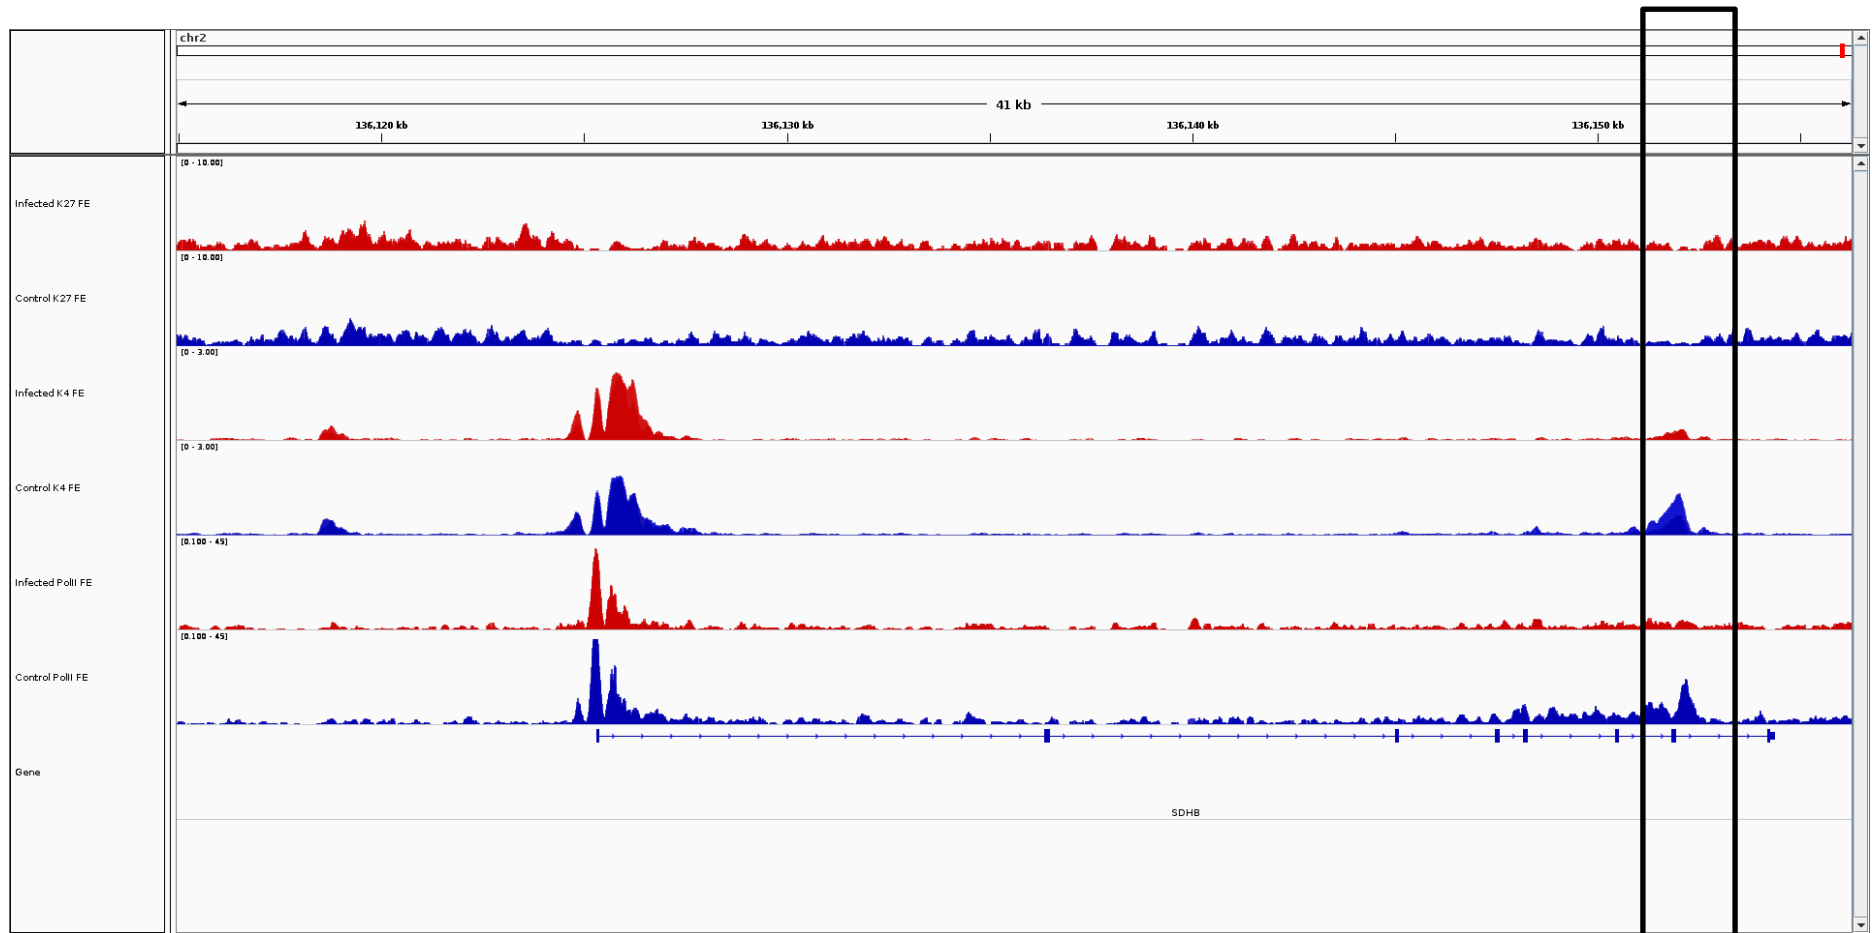

***SDHB***



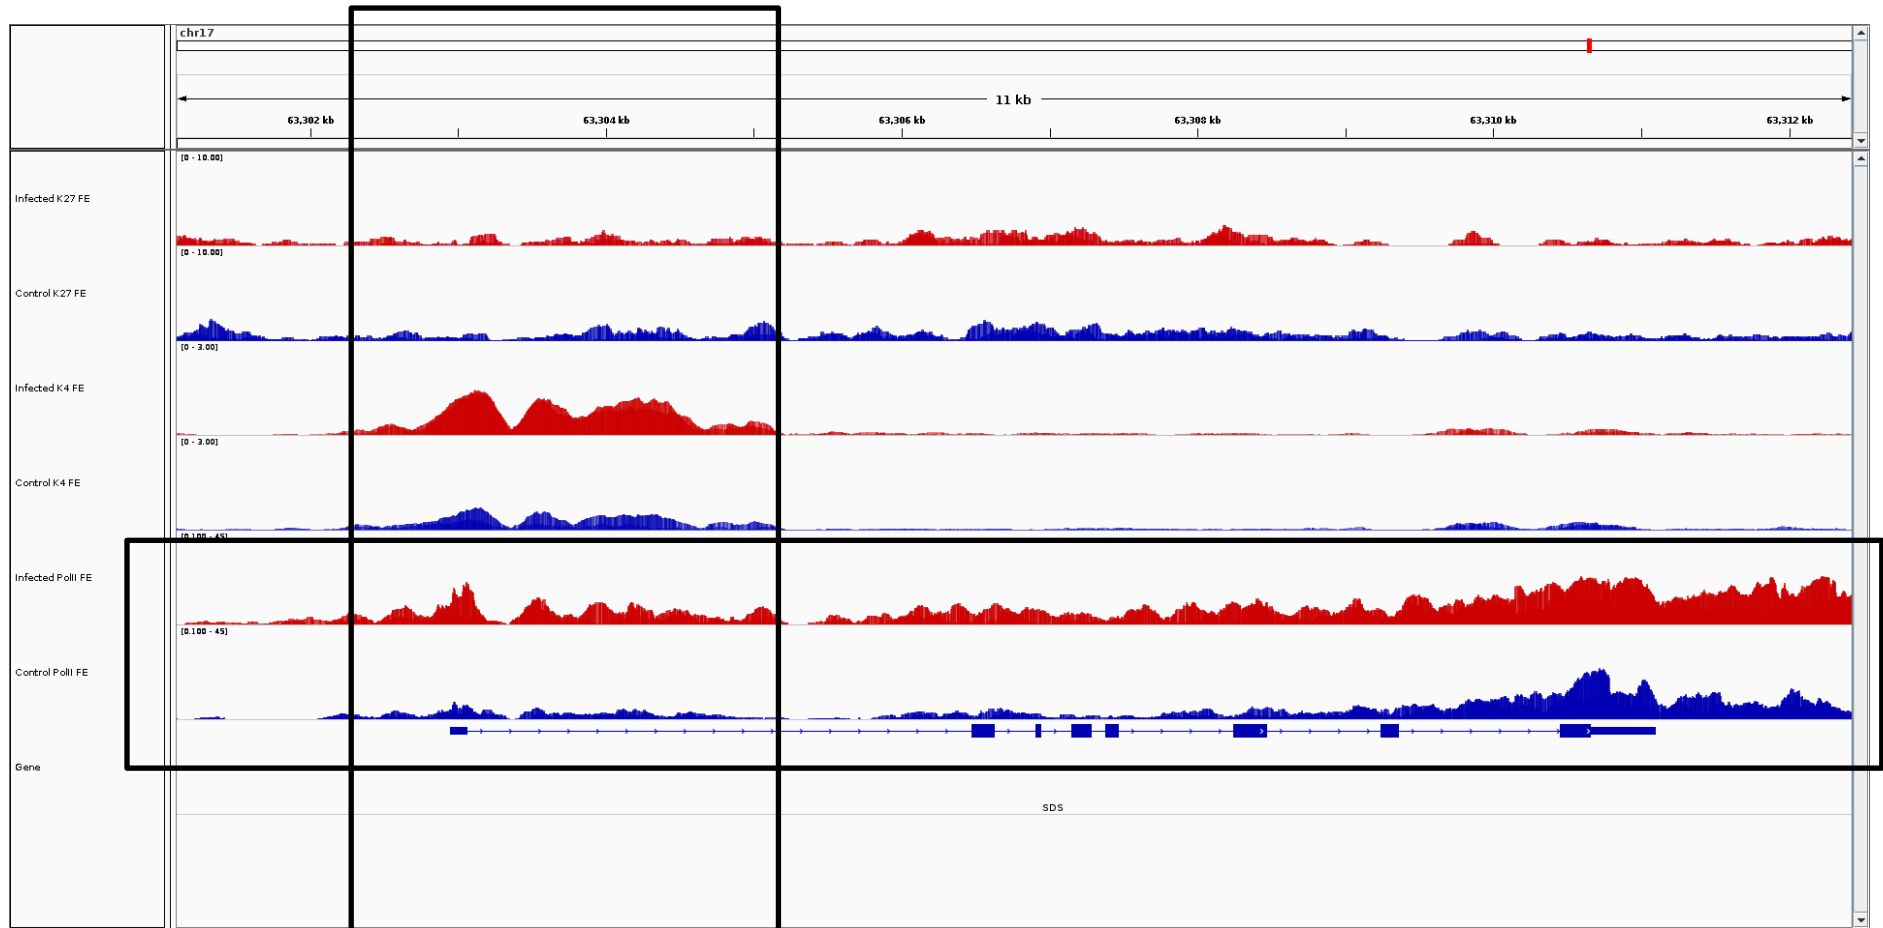

*SDS*

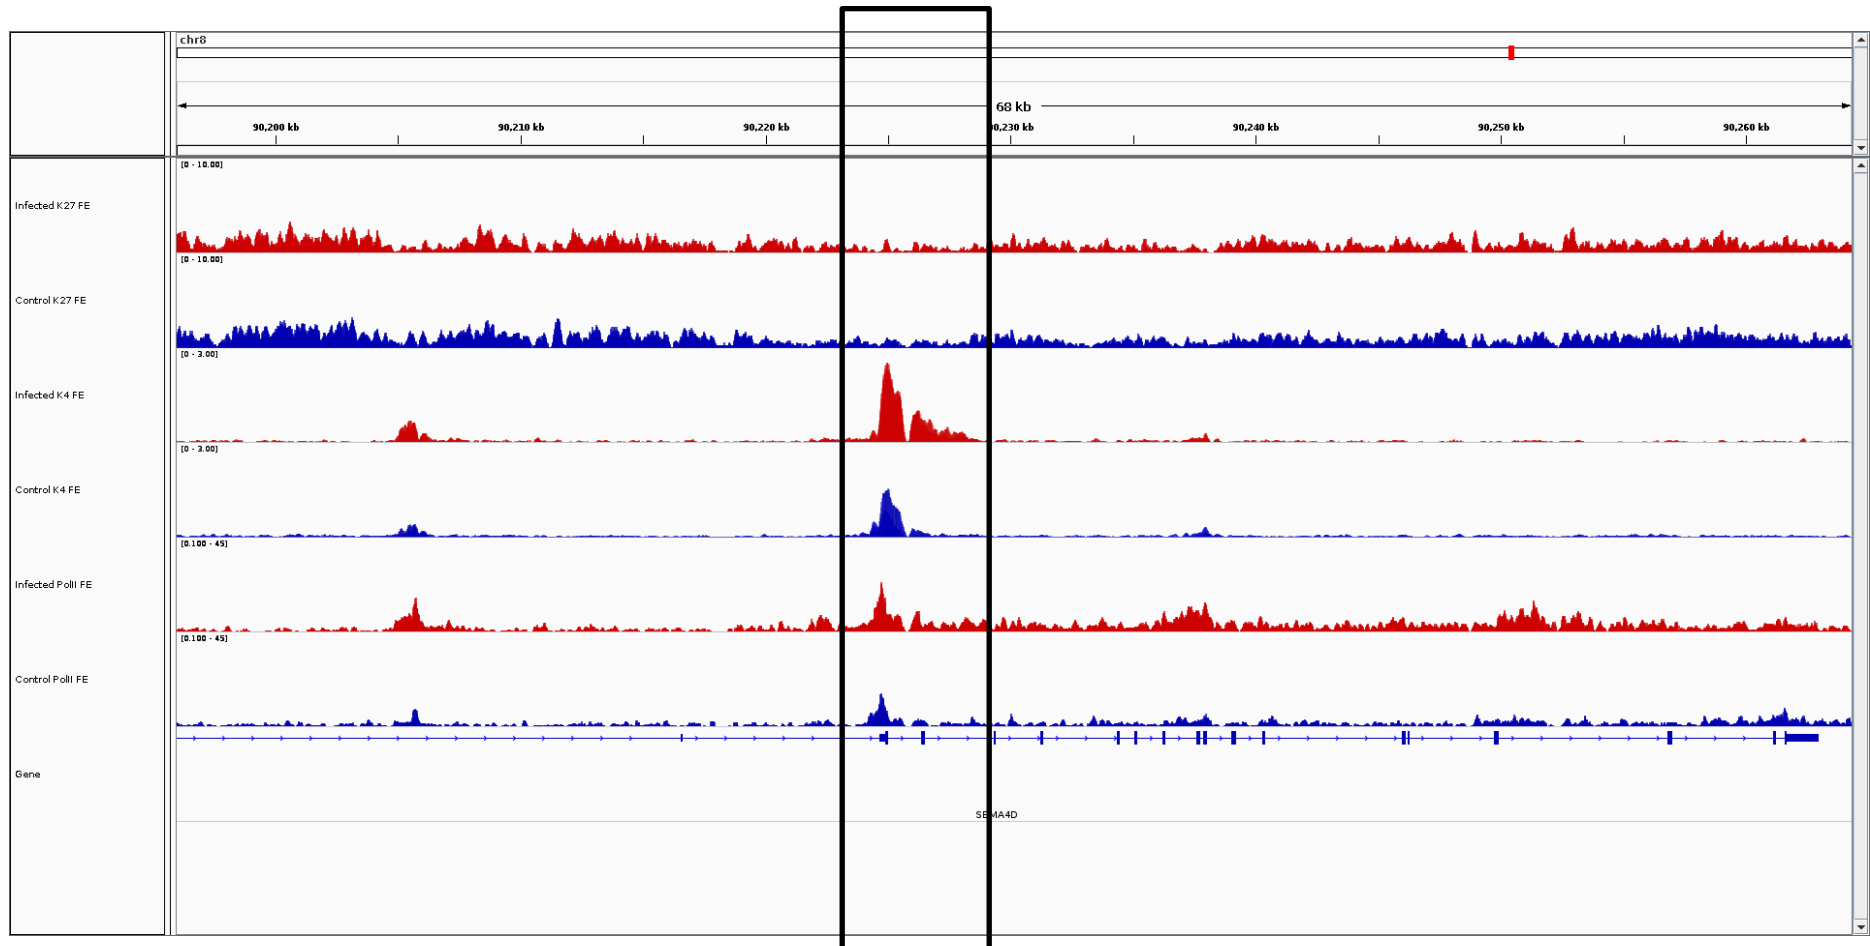

***SEMA4D***

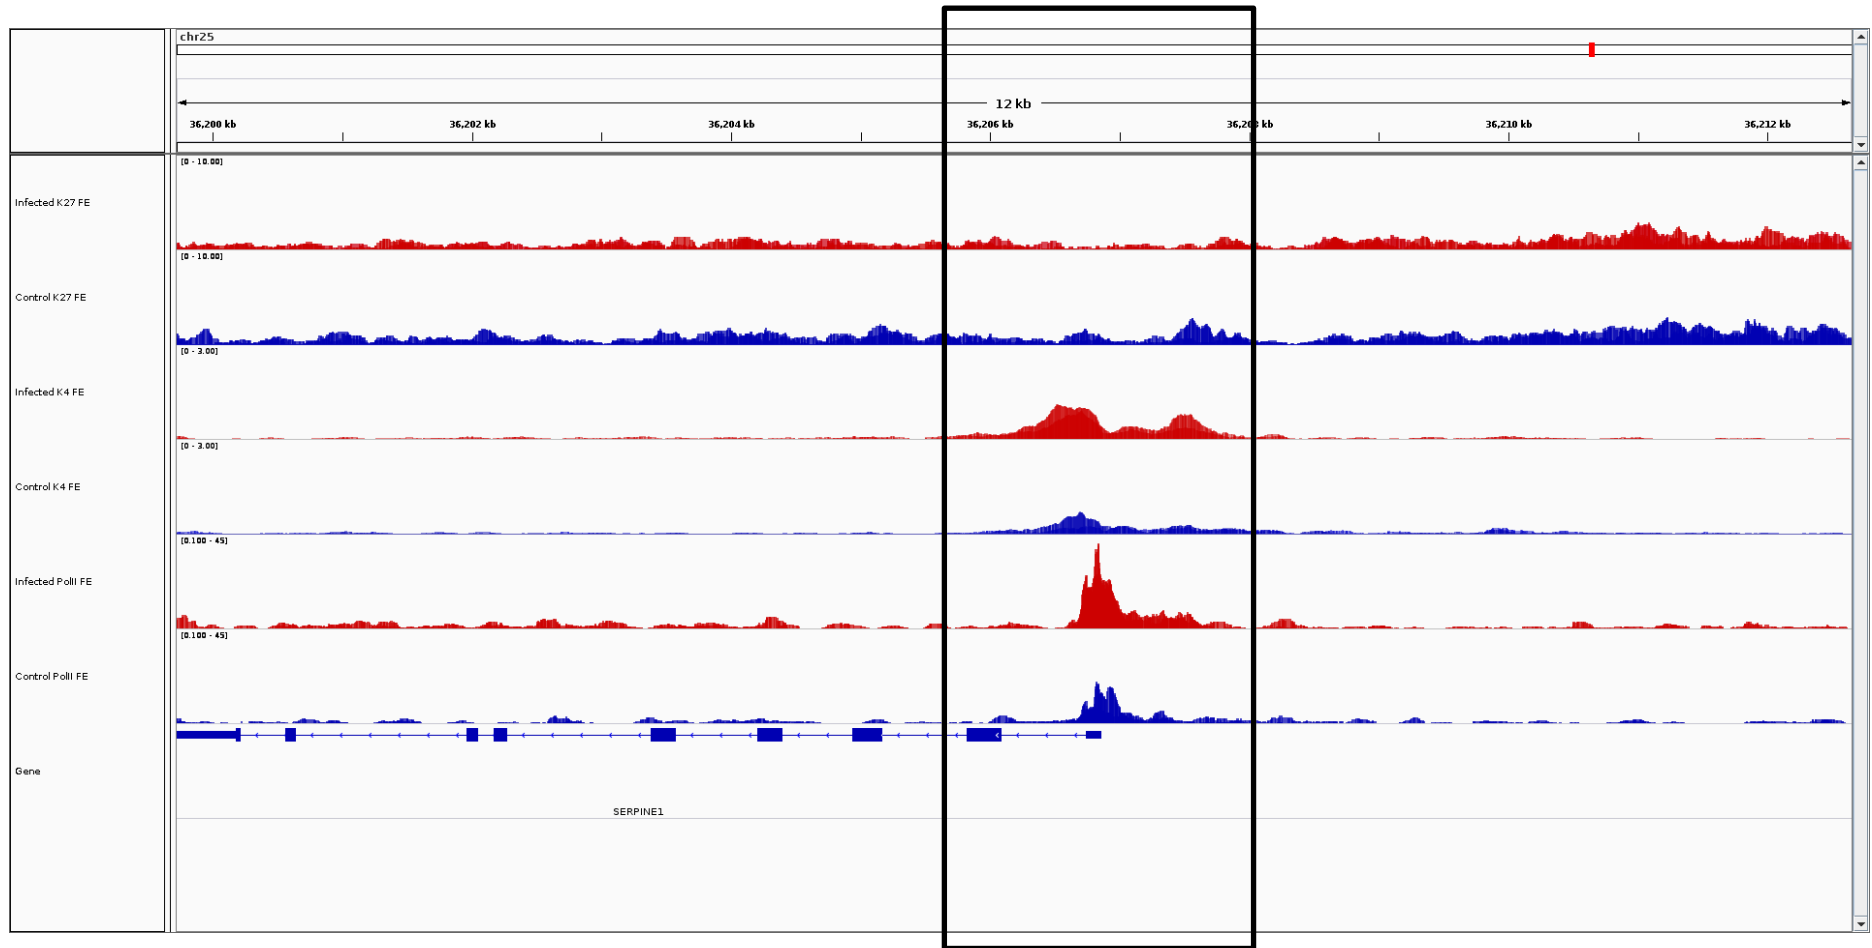

***SERPINE1***

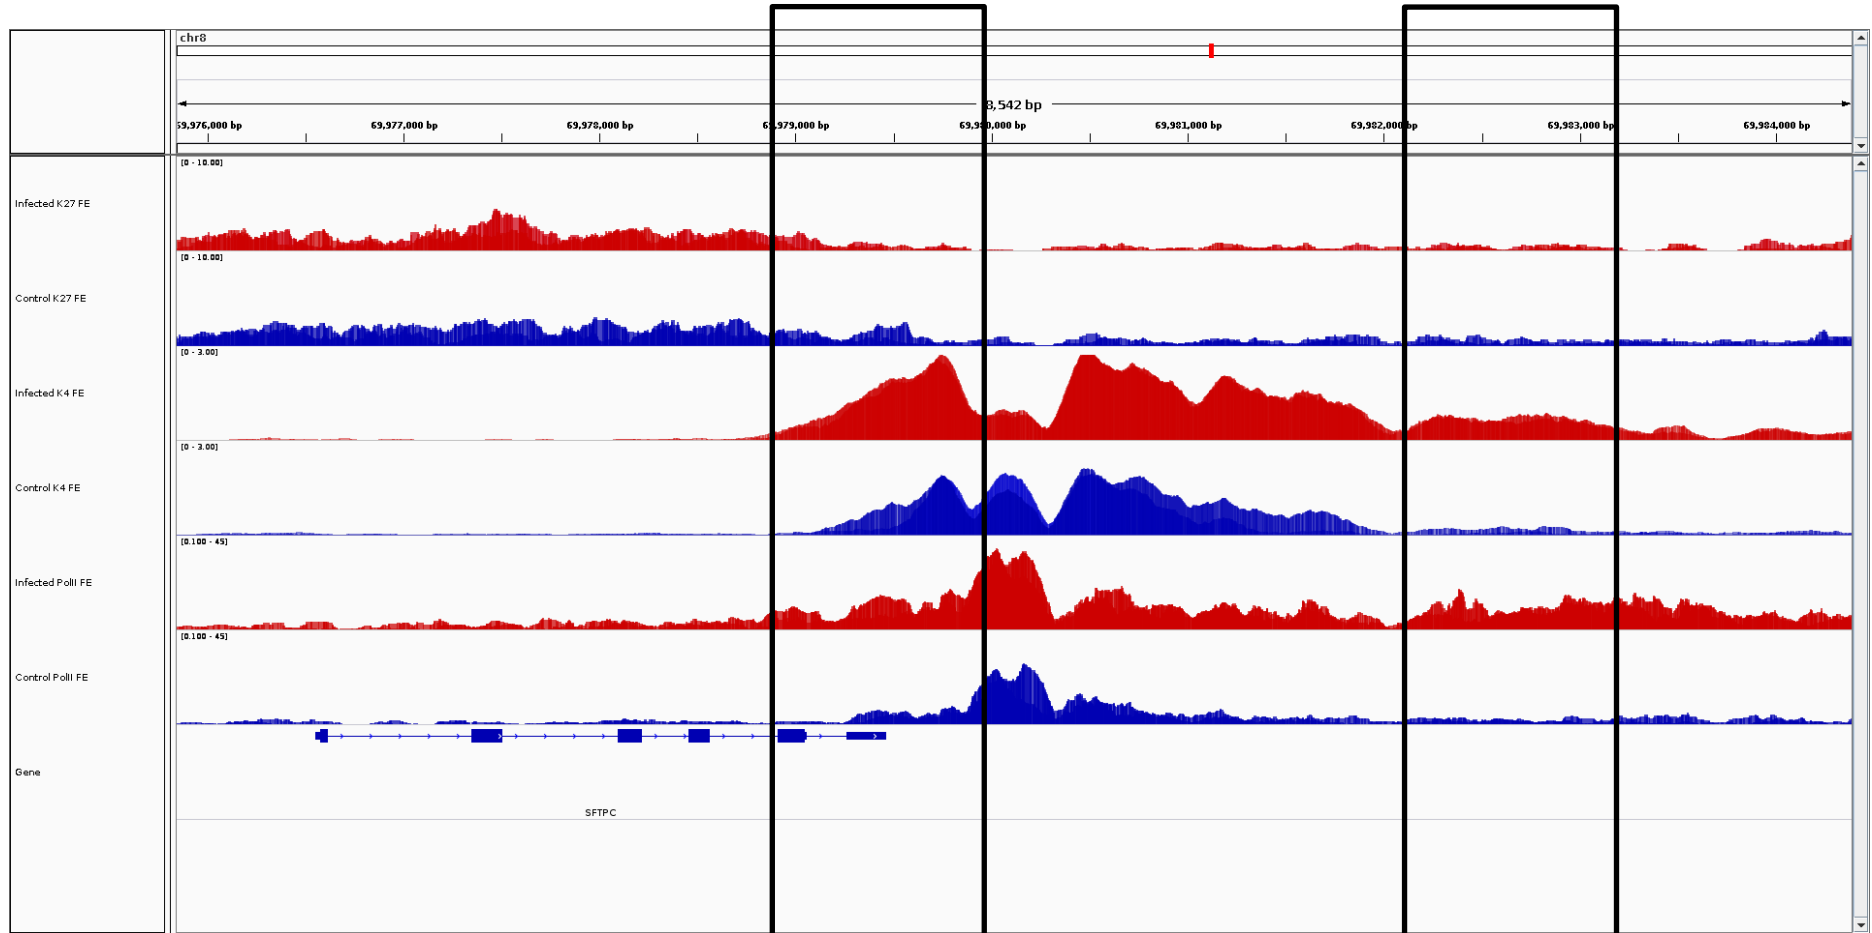

*SFTPC*

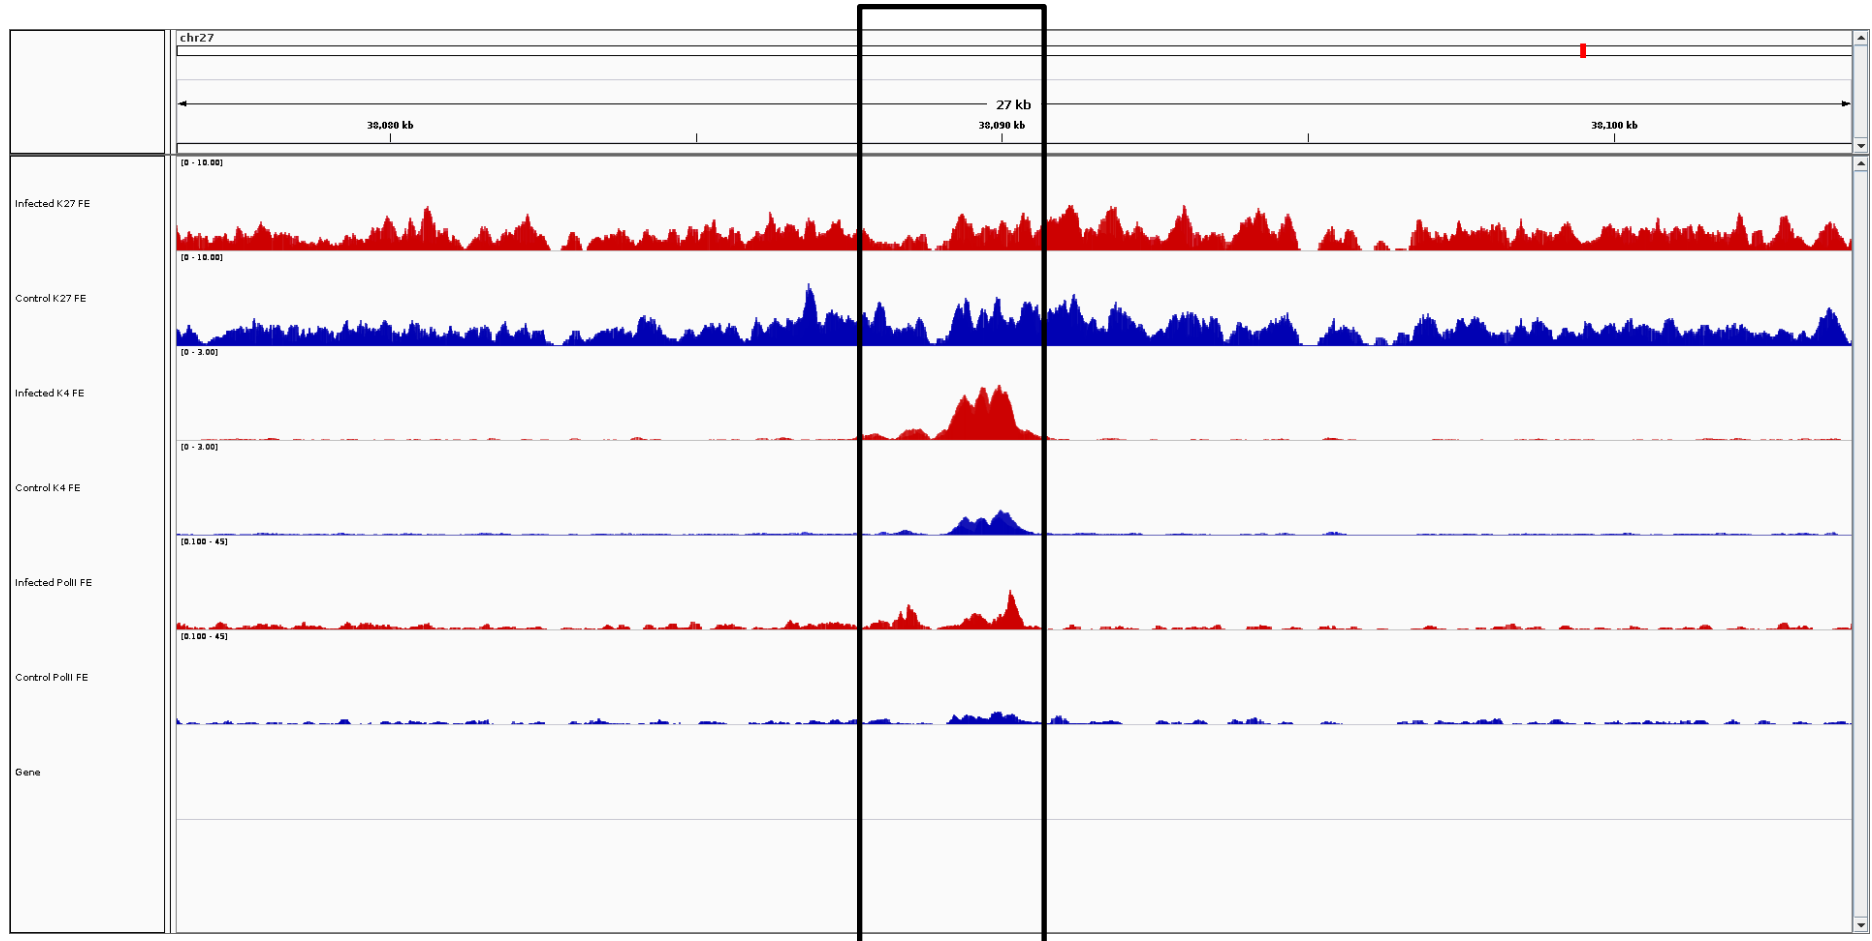

***SH2D4A***

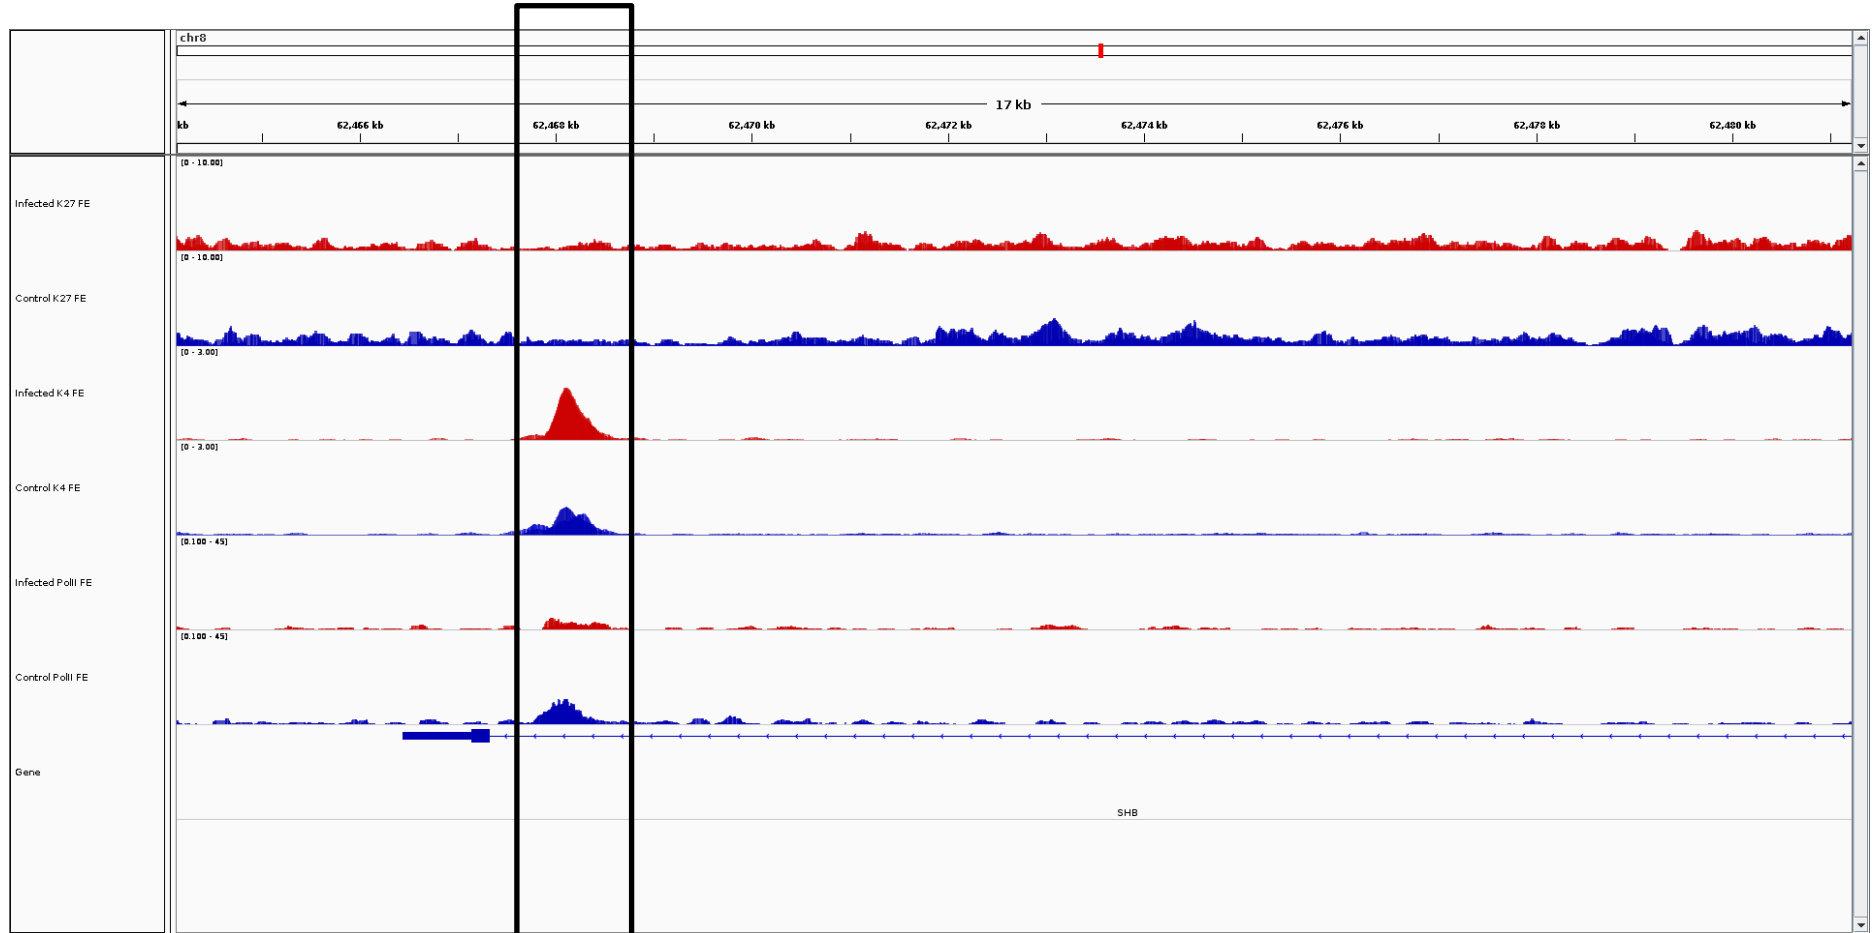

***SHB***

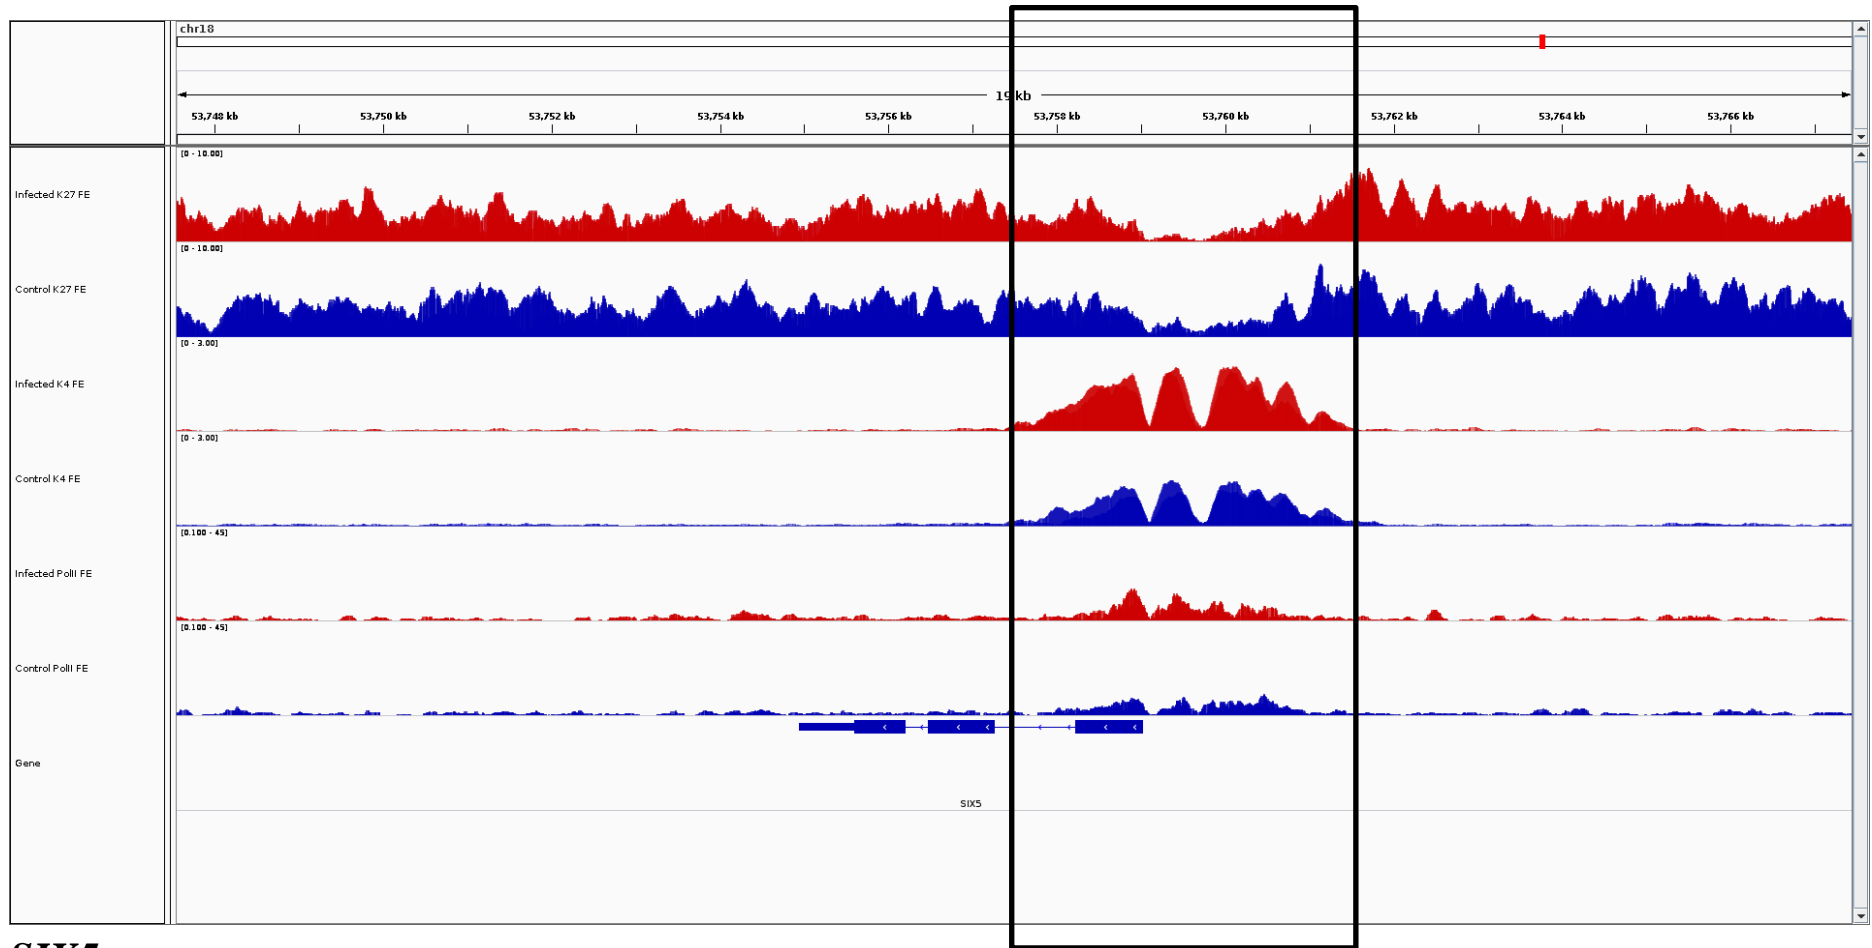

**SIX5**

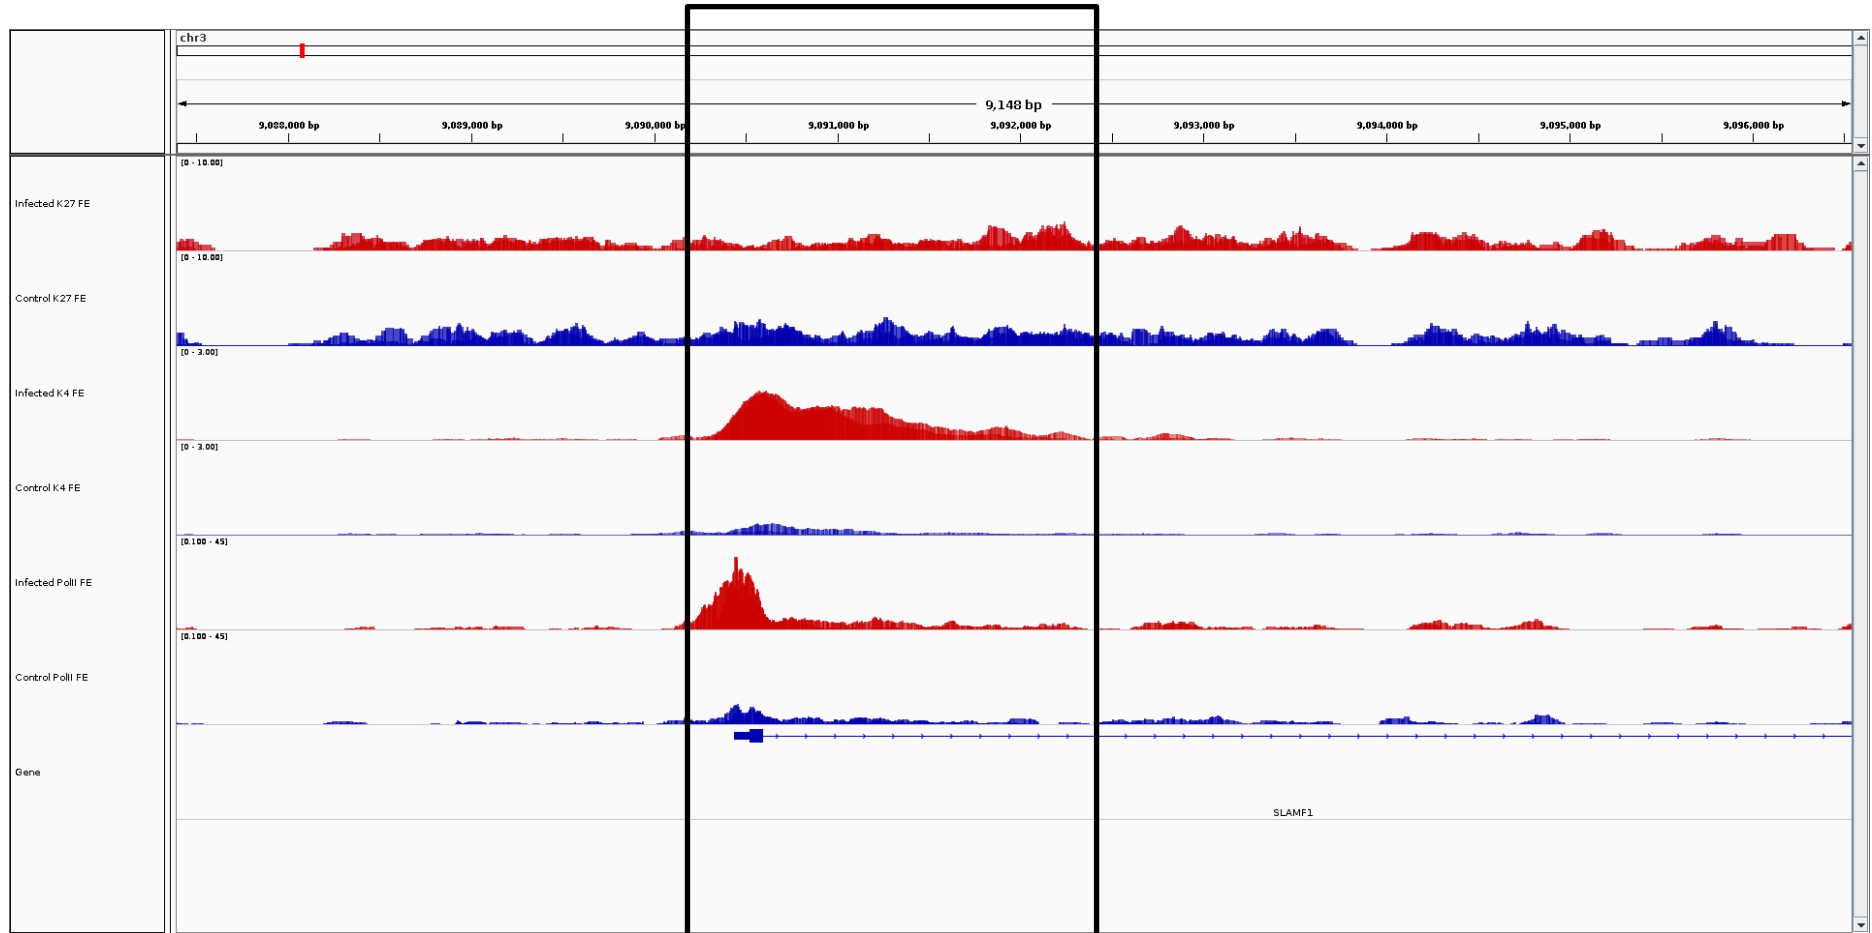

***SLAMF1***



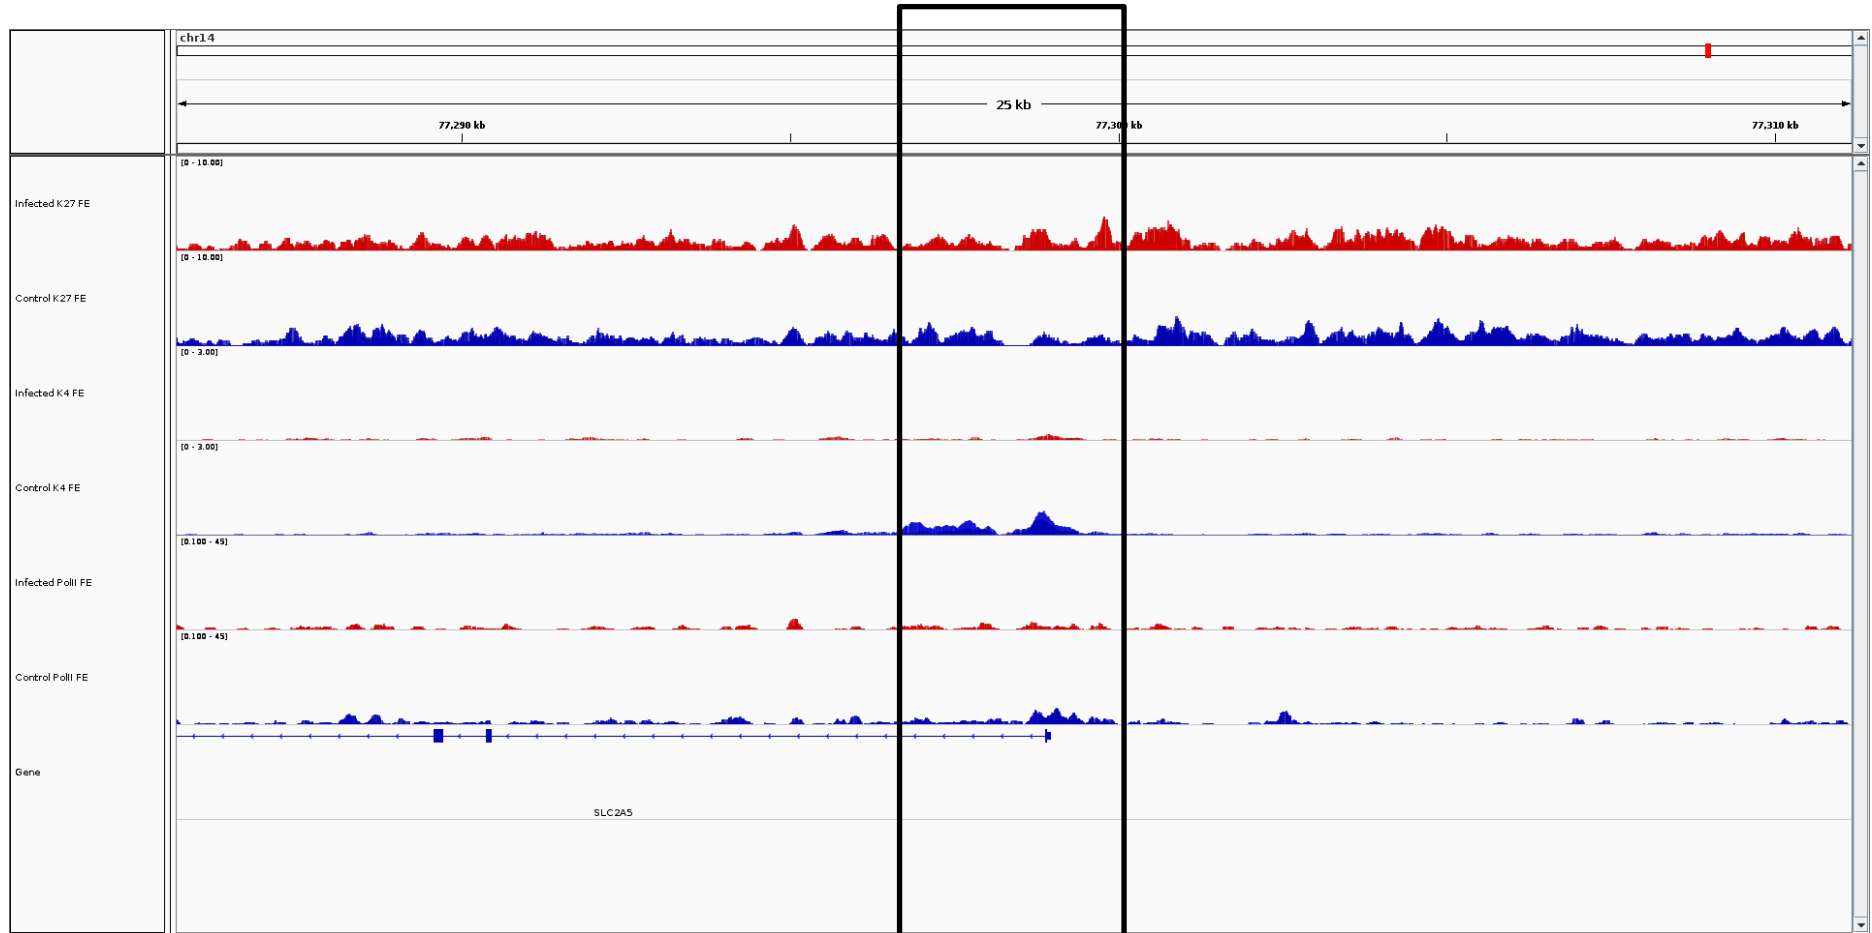

***SLC2A5***

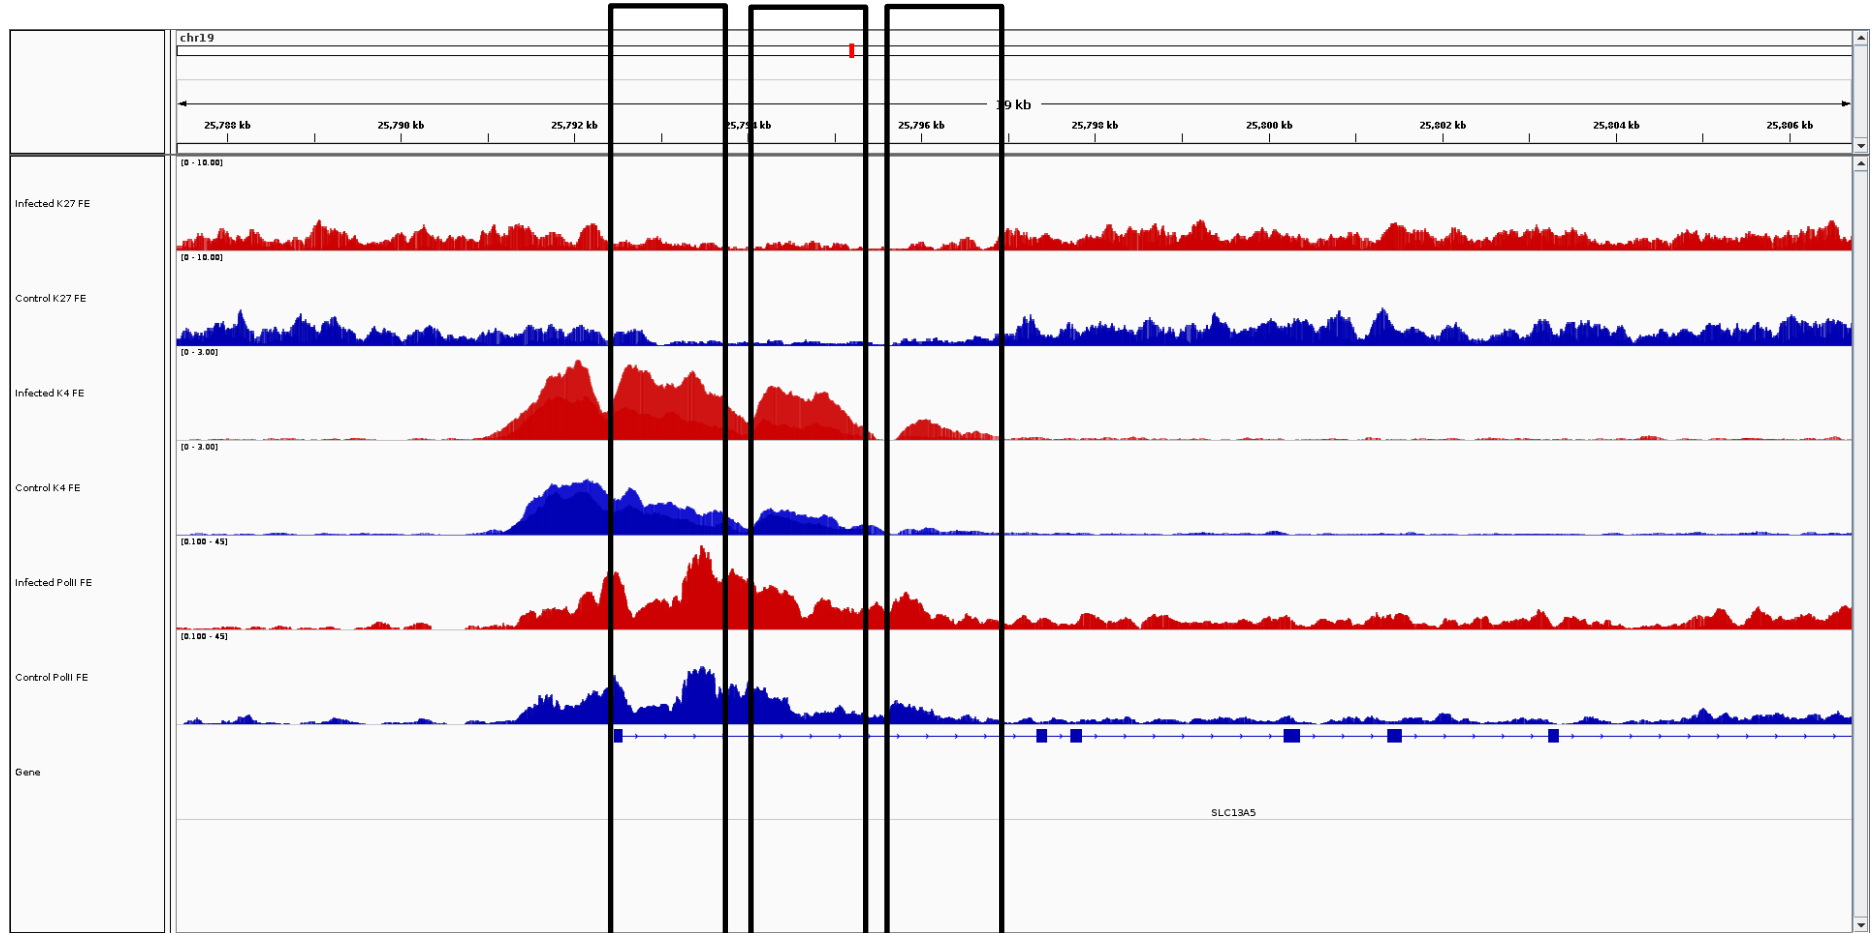

***SLC13A5***

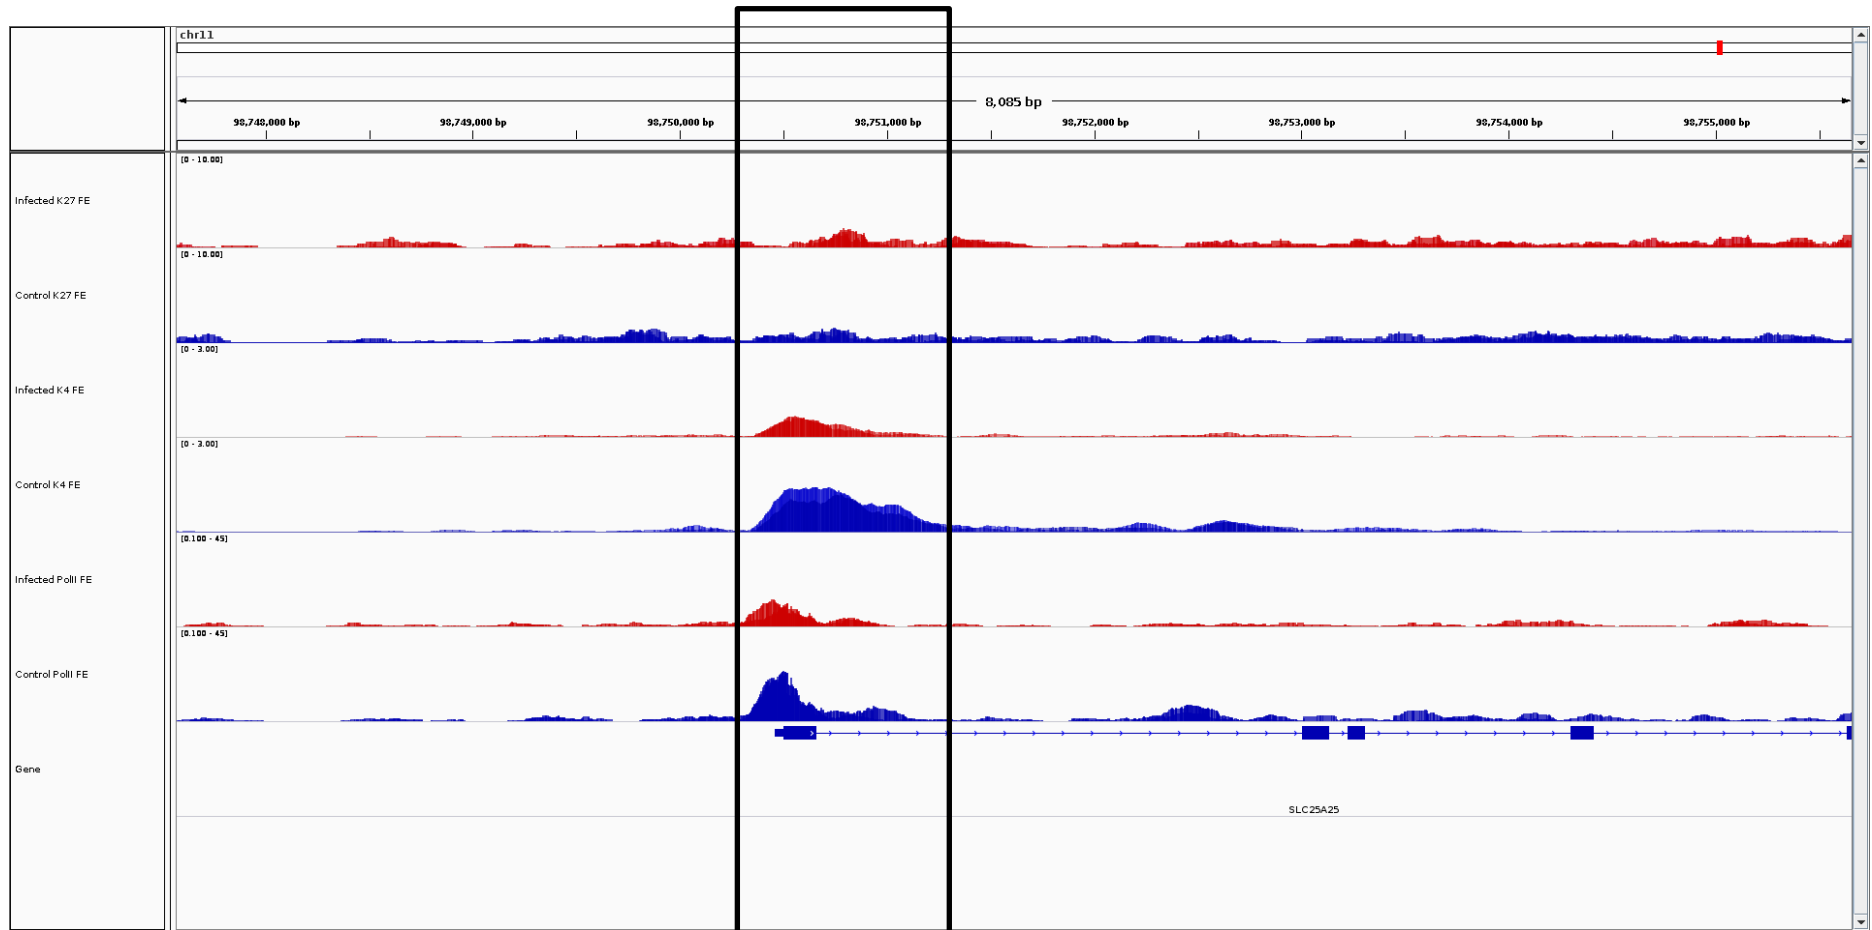

***SLC25A25***

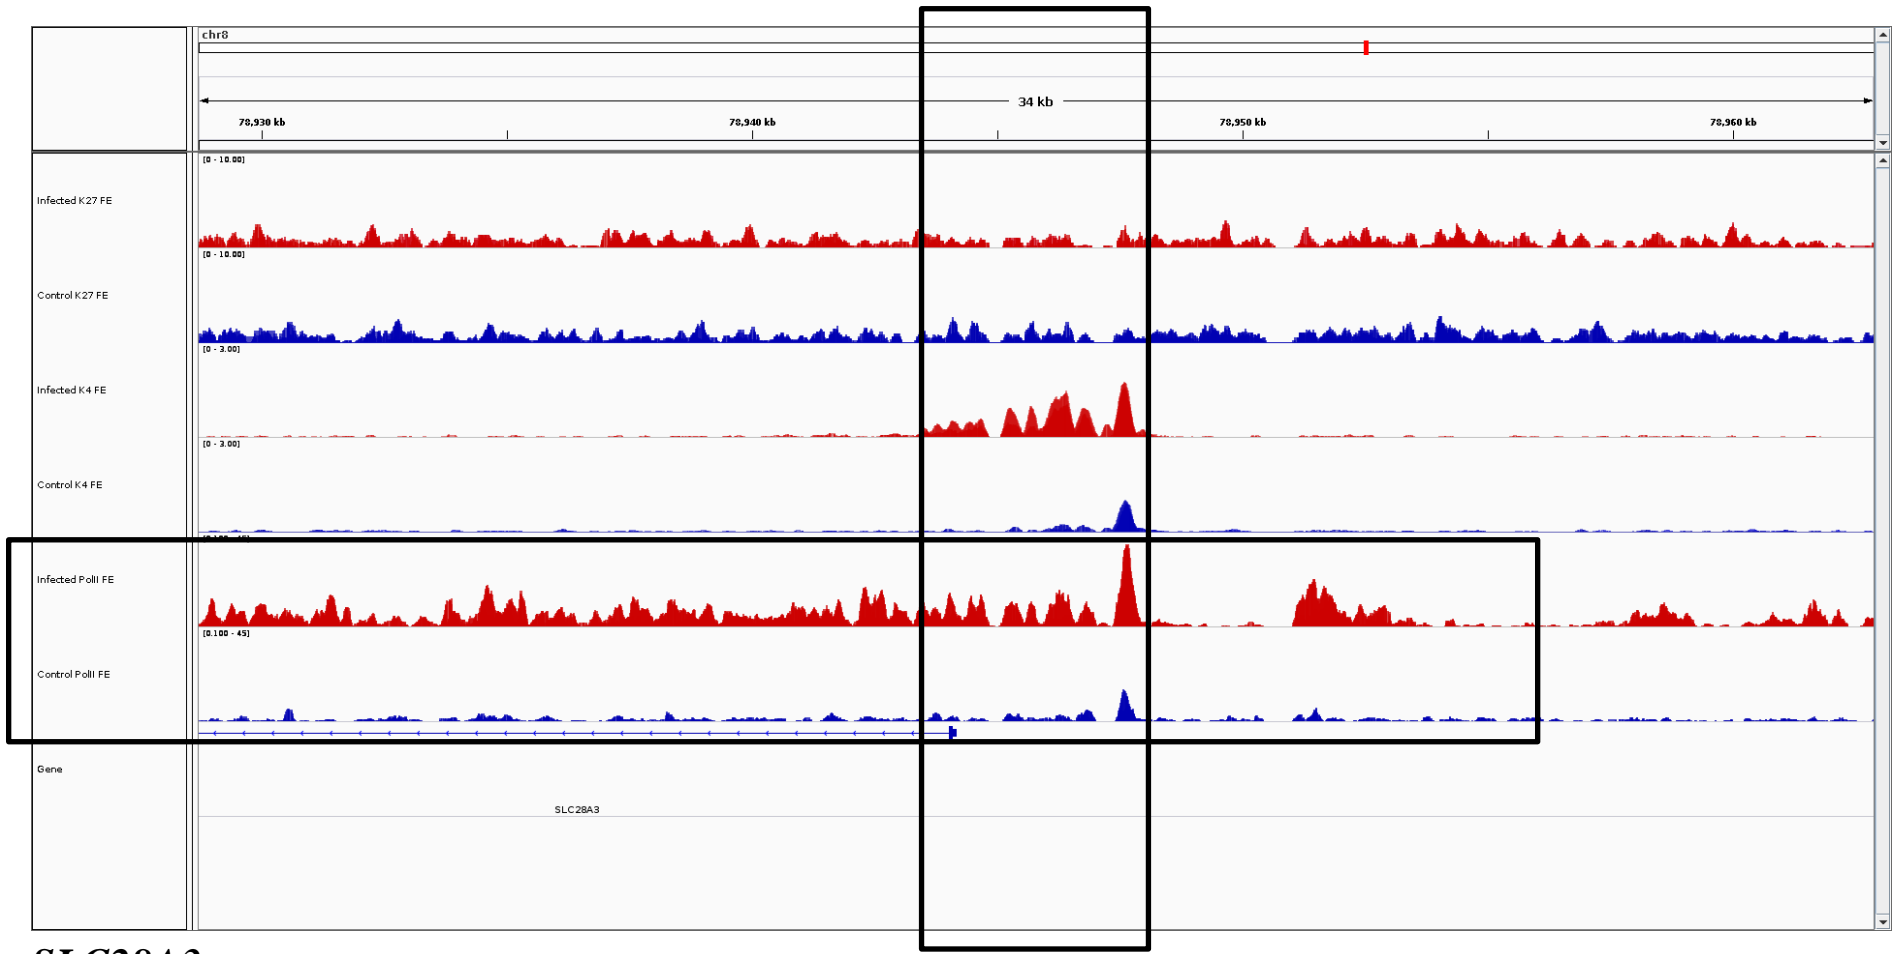

***SLC28A3***

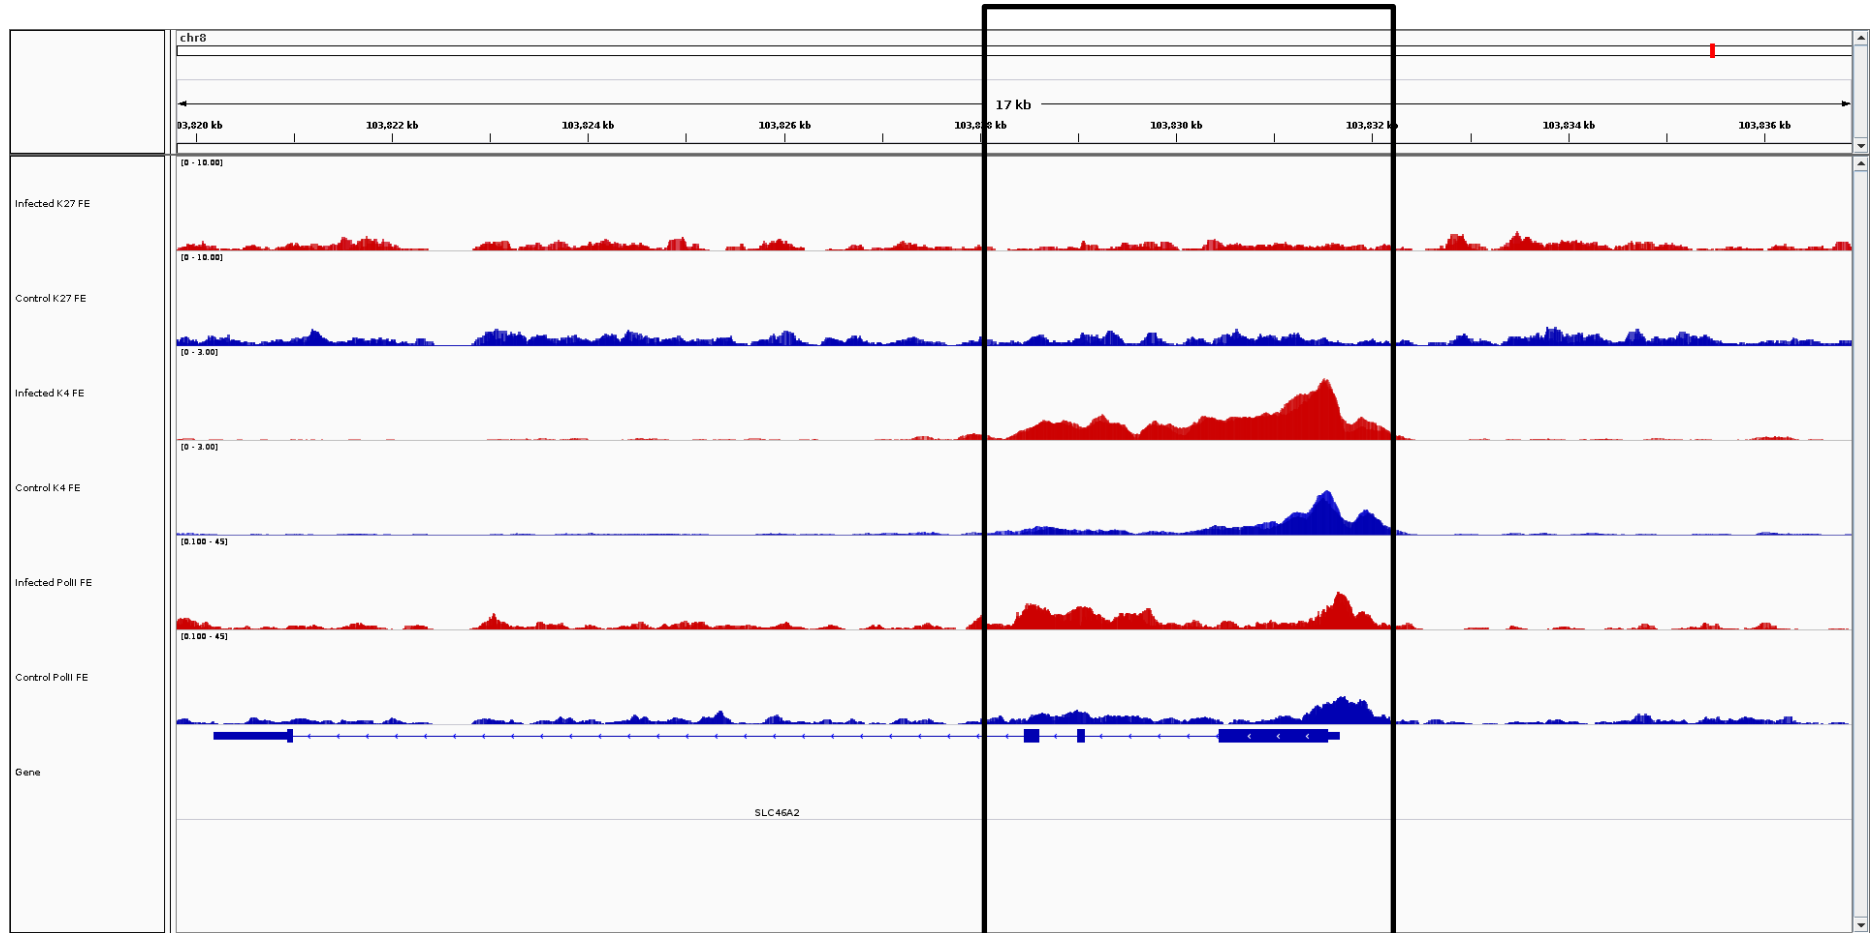

***SLC46A2***

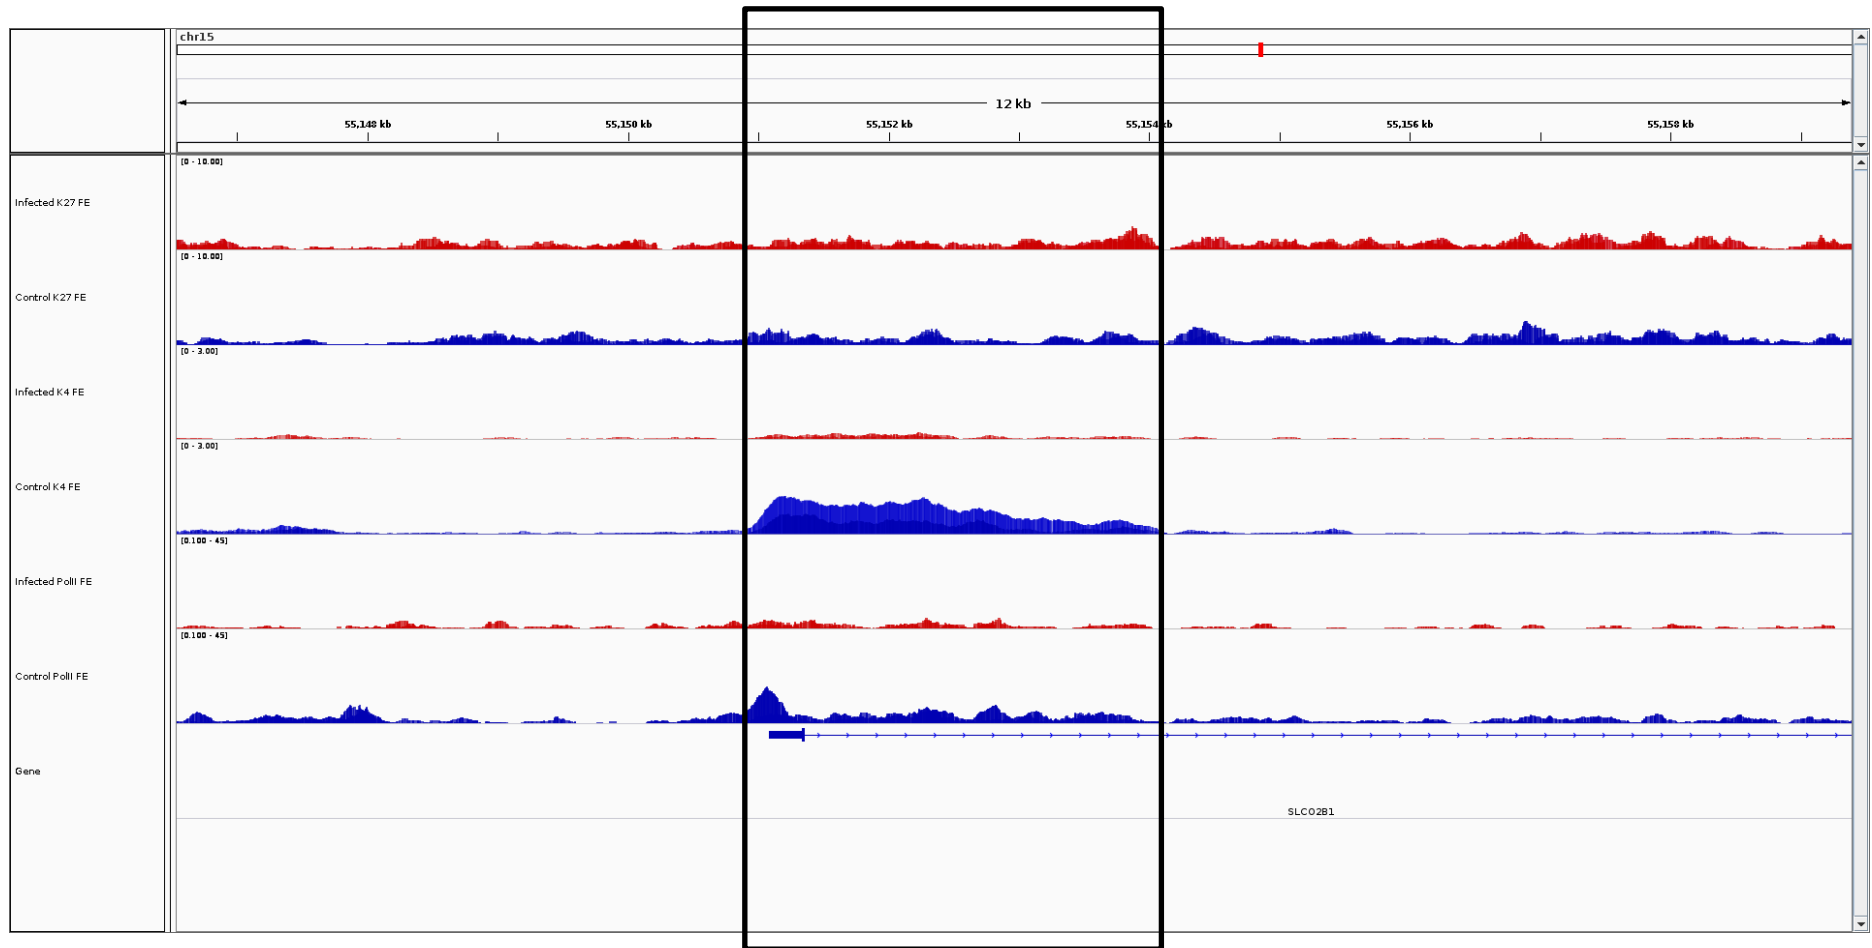

***SLC02B1***

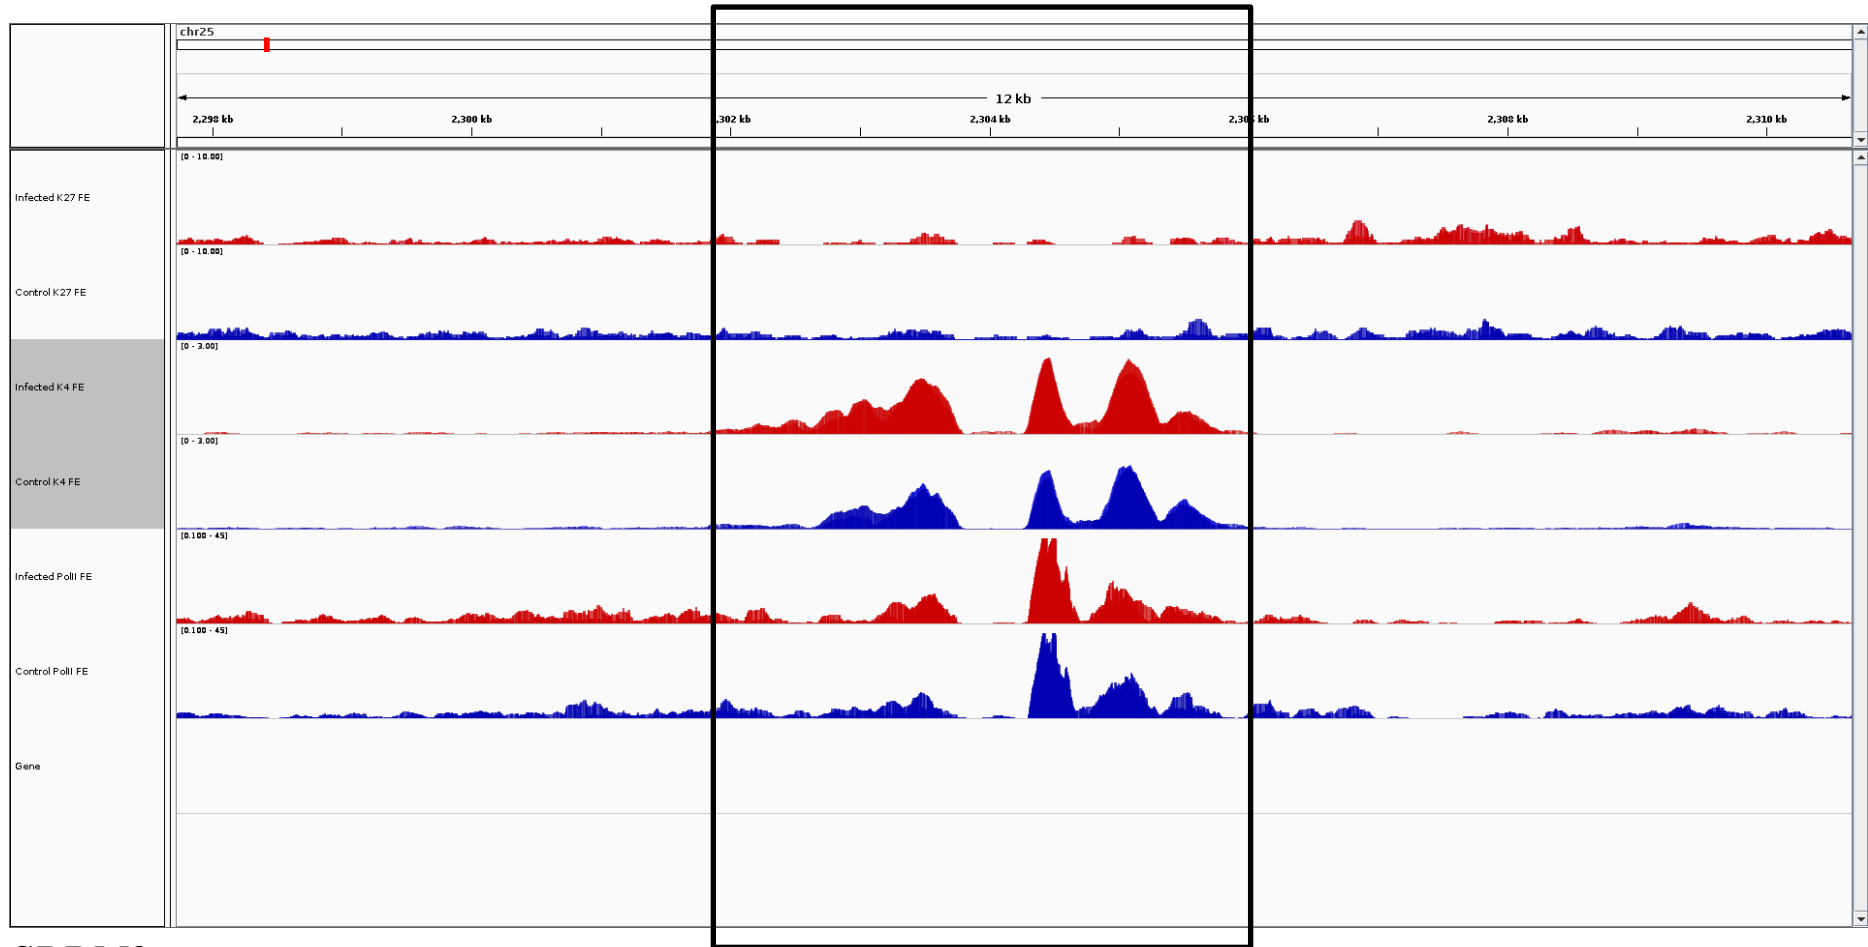

***SRRM2***

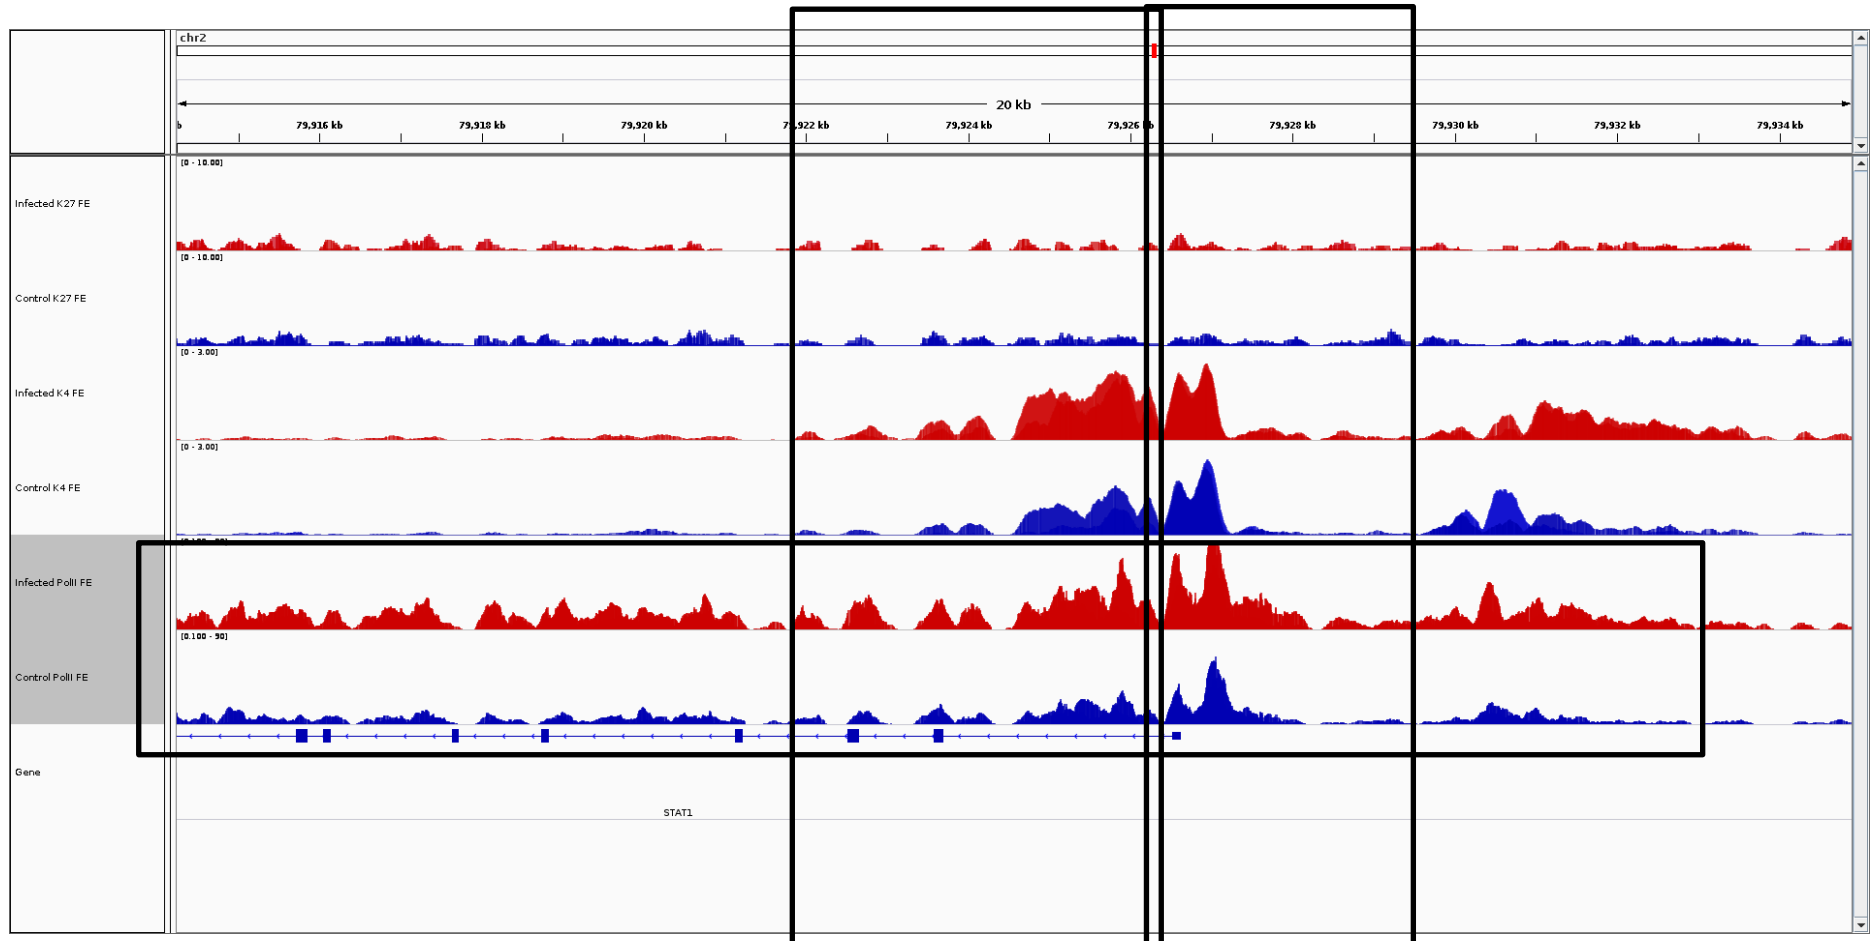

***STAT1***



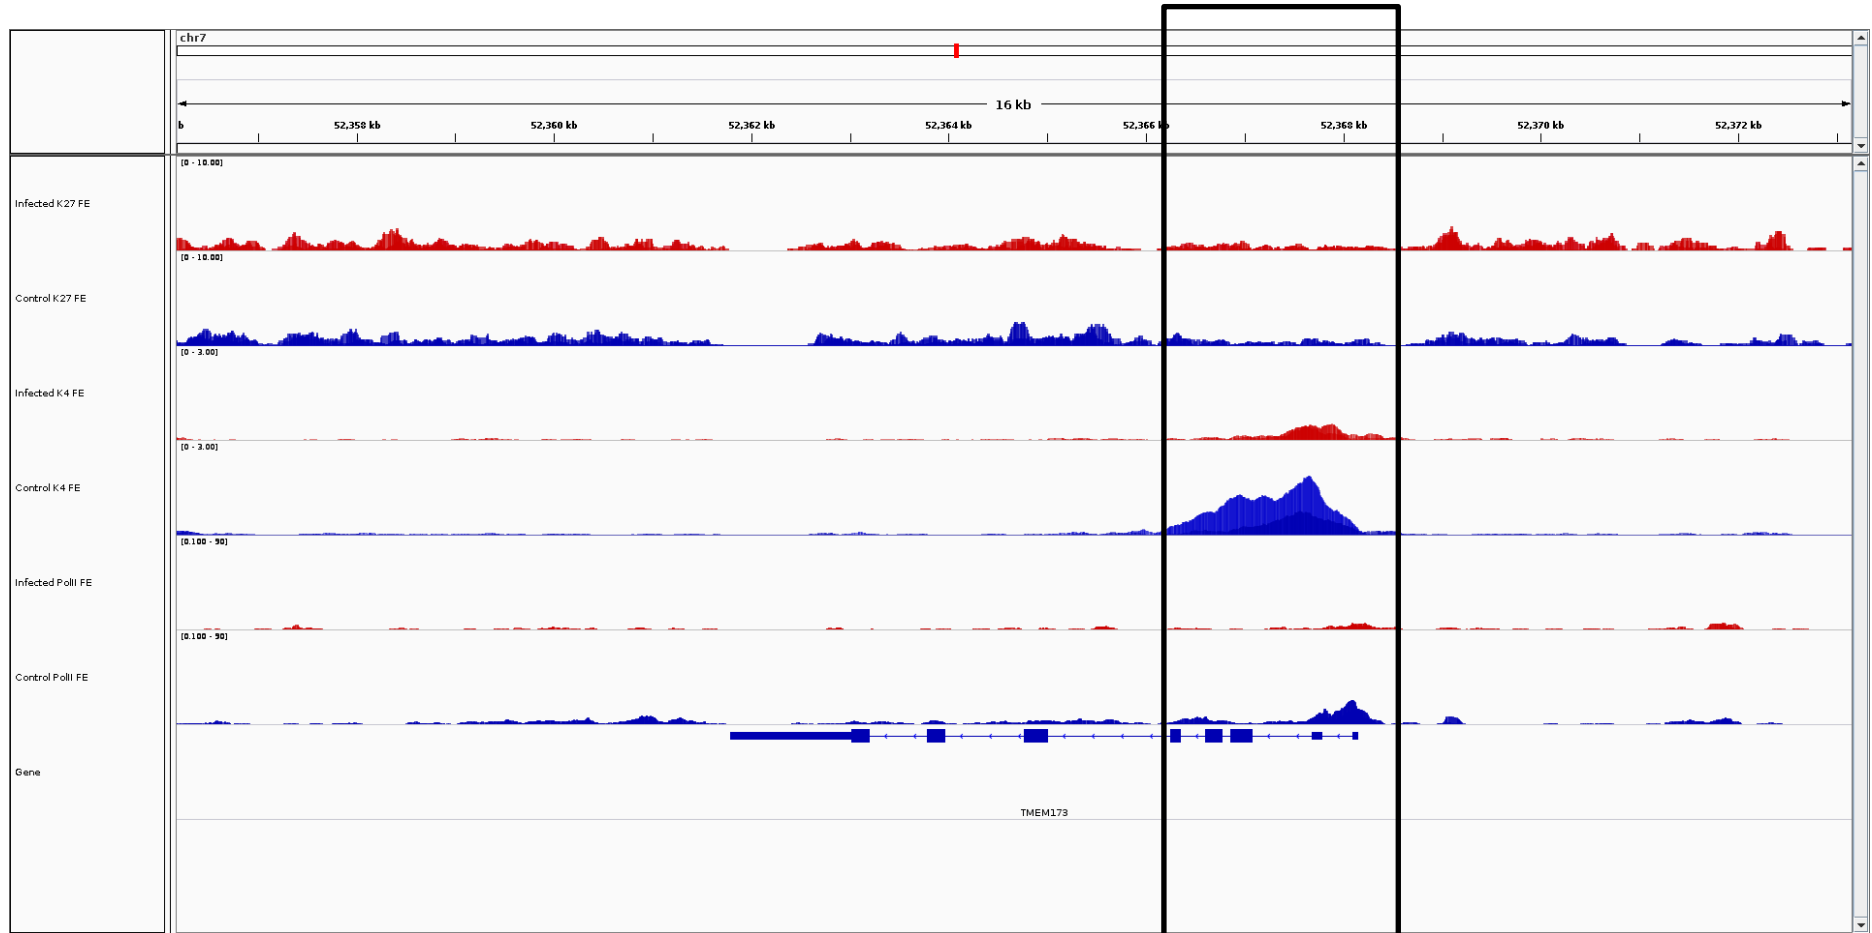

***STING***

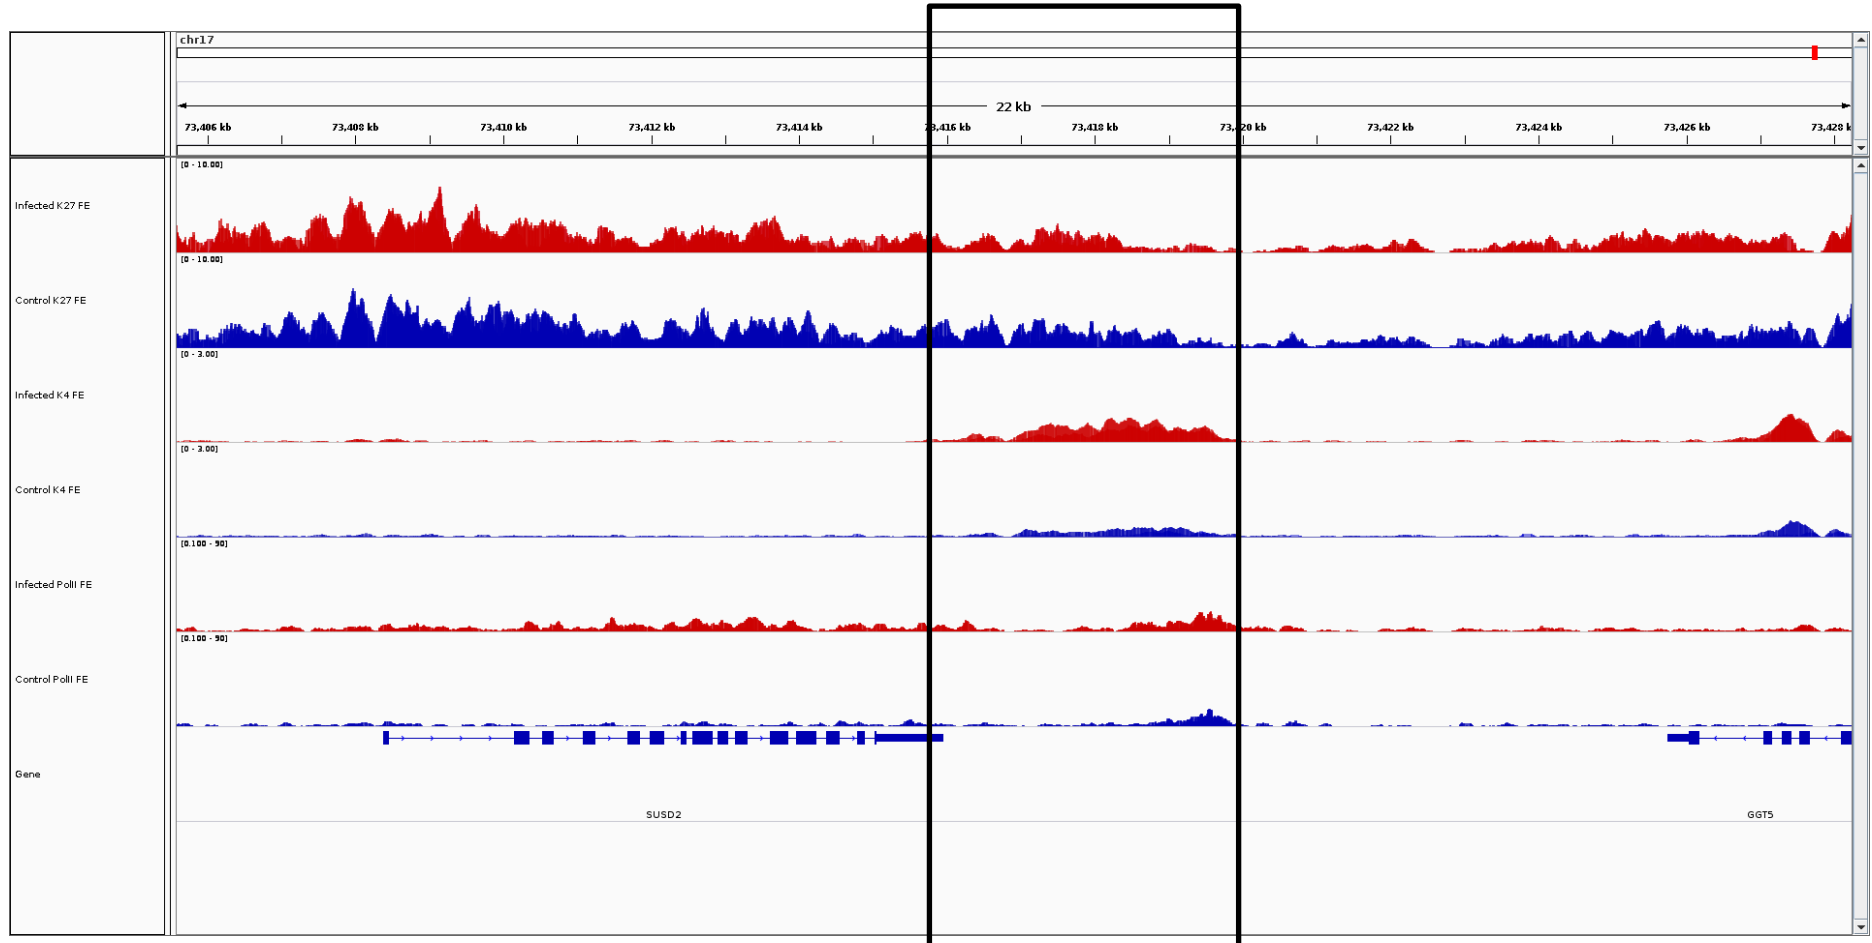

*SUSD2*

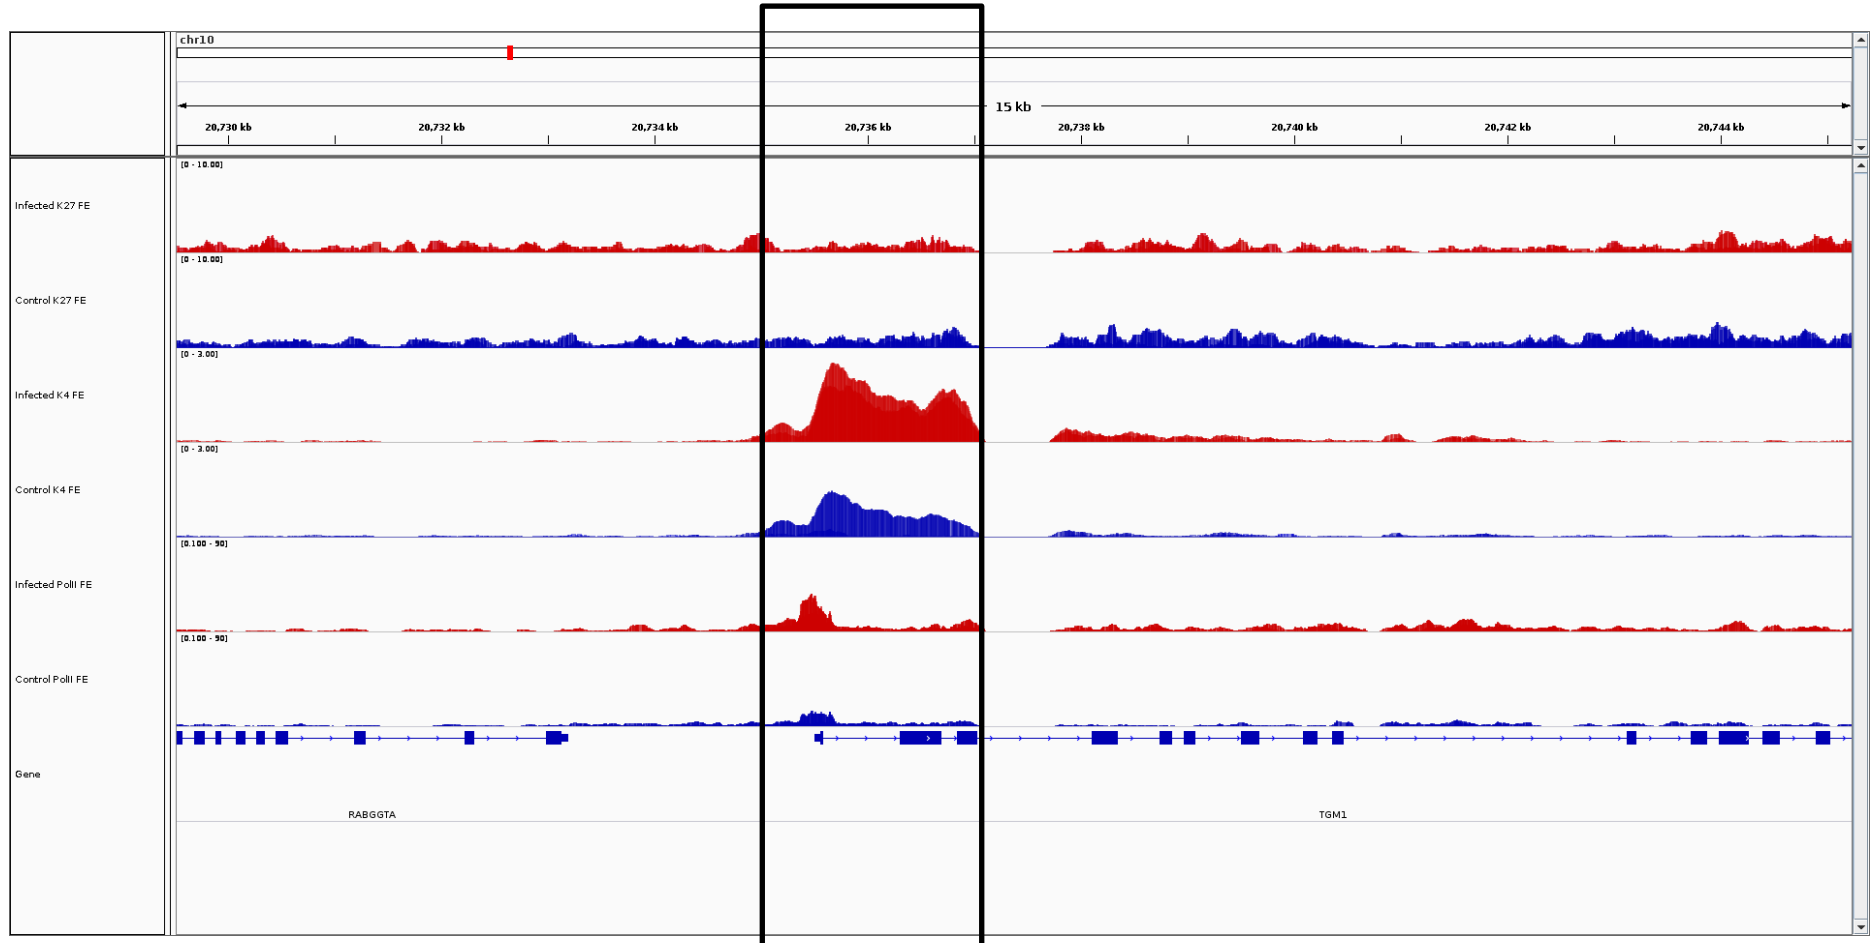

*TGM1*

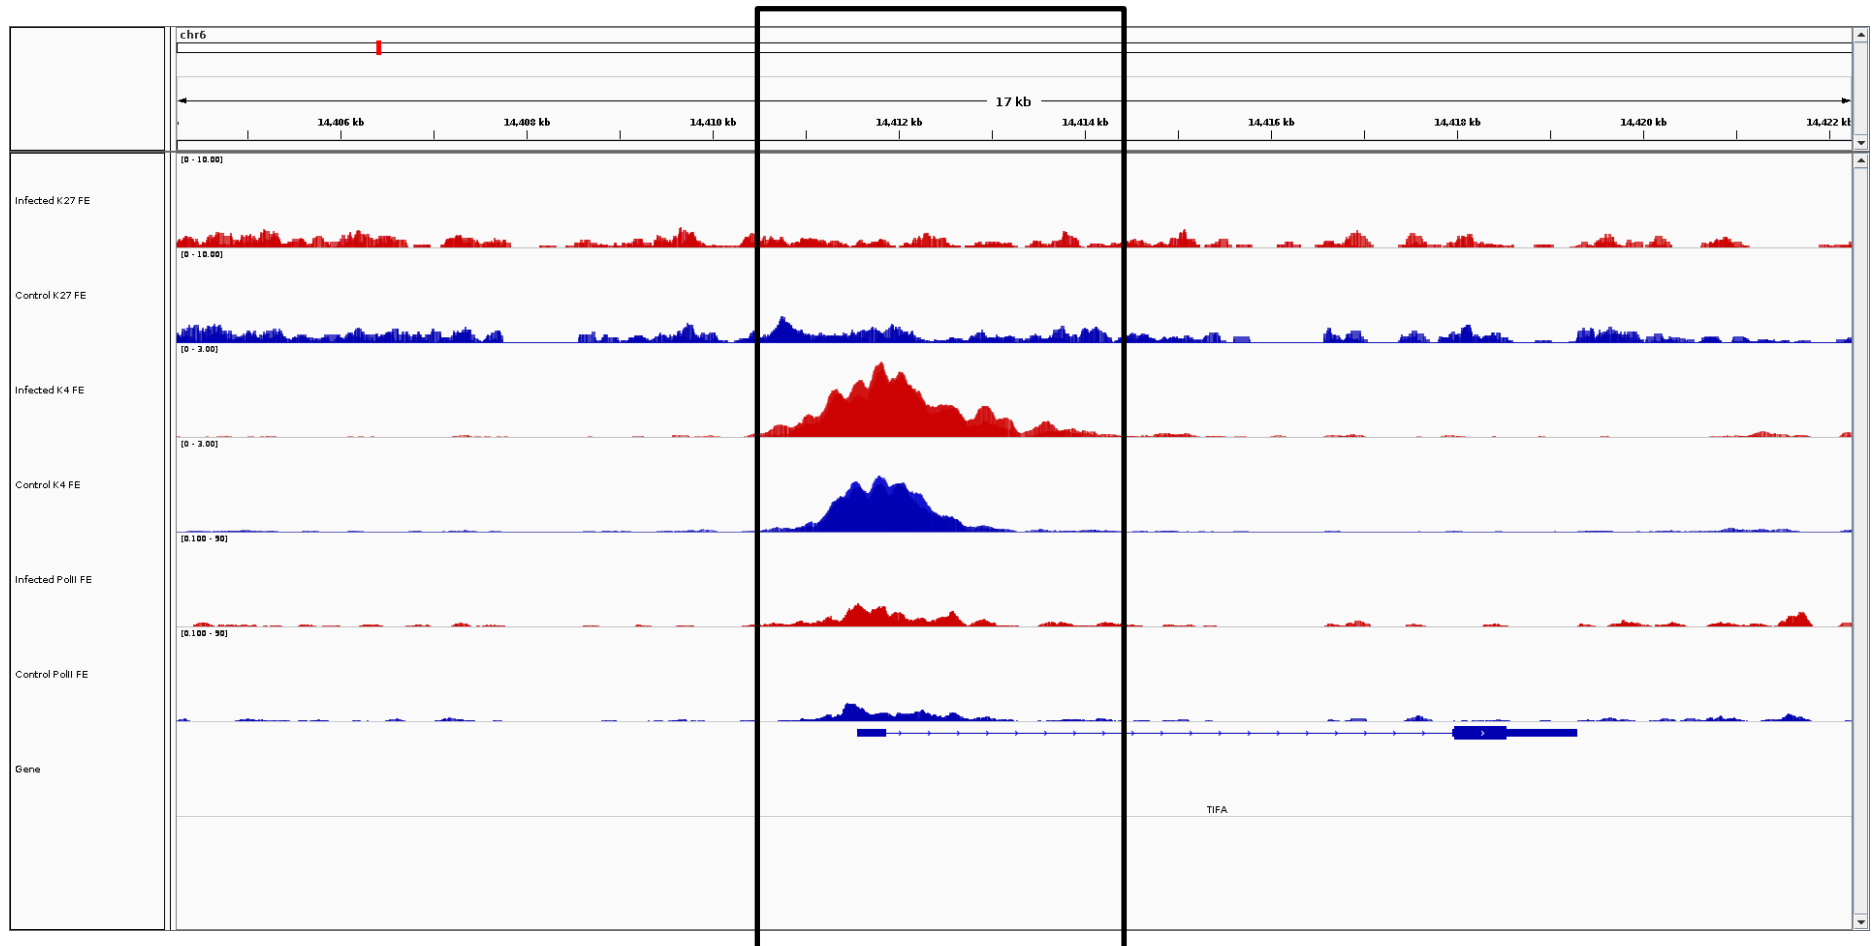

***TIFA***

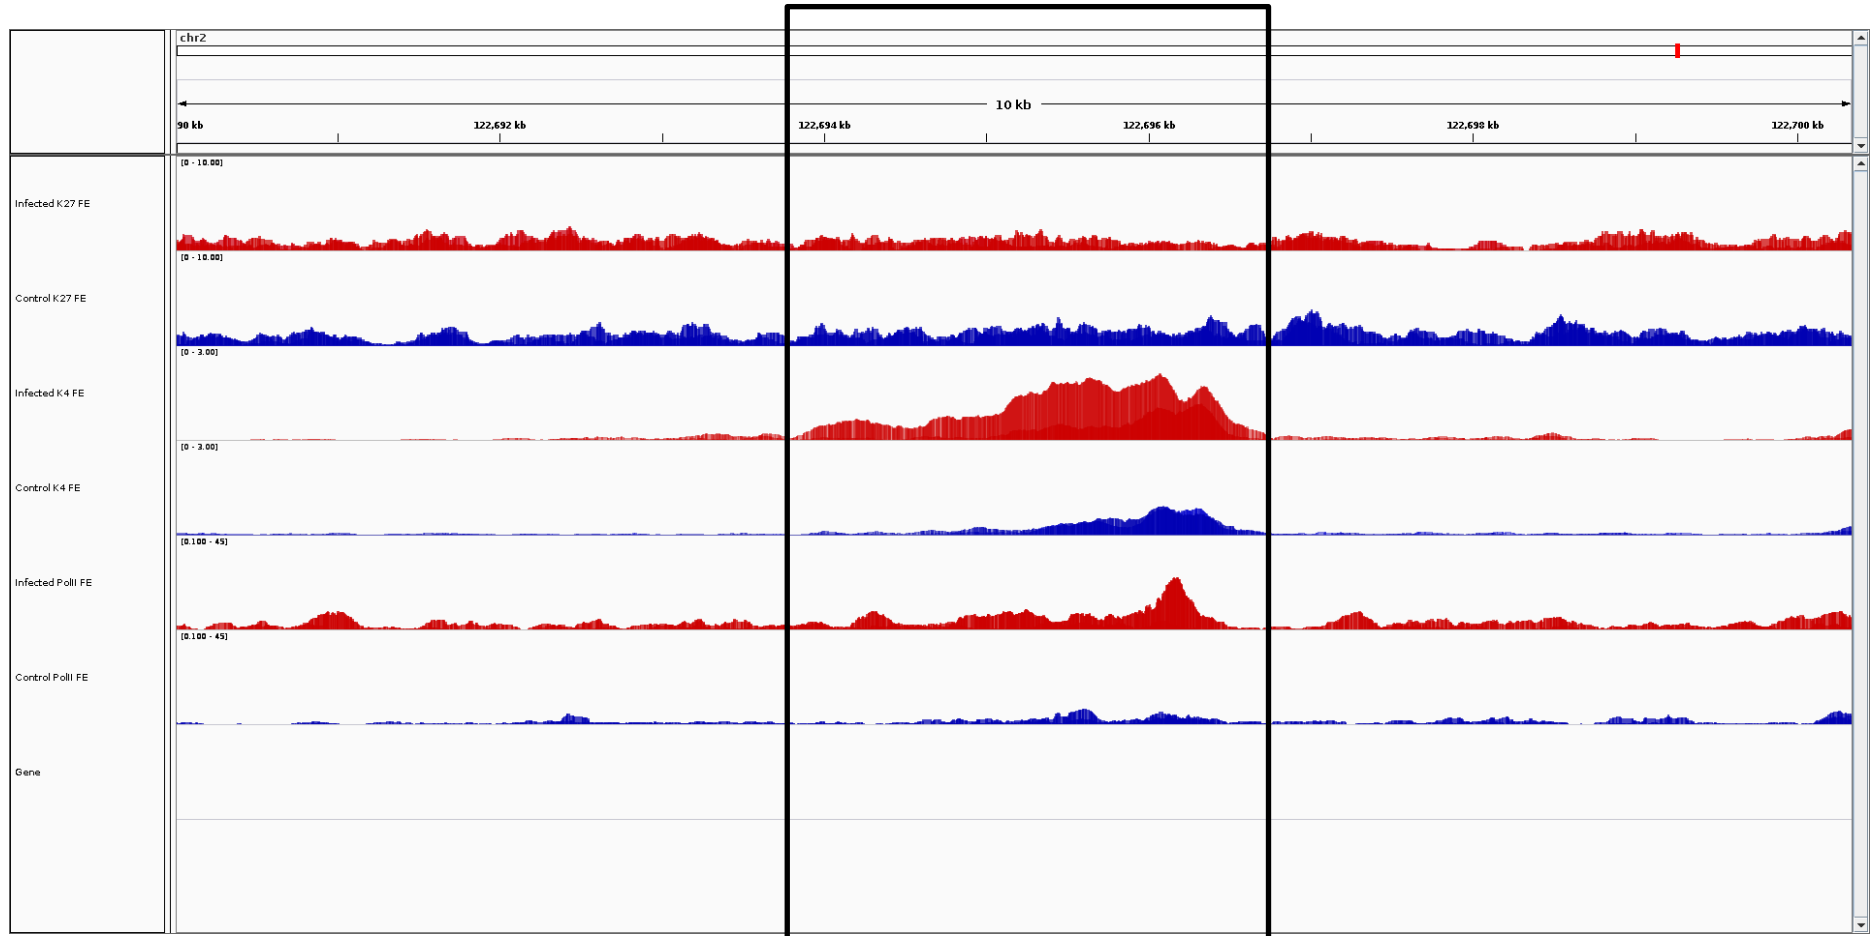

***TINAGL1***

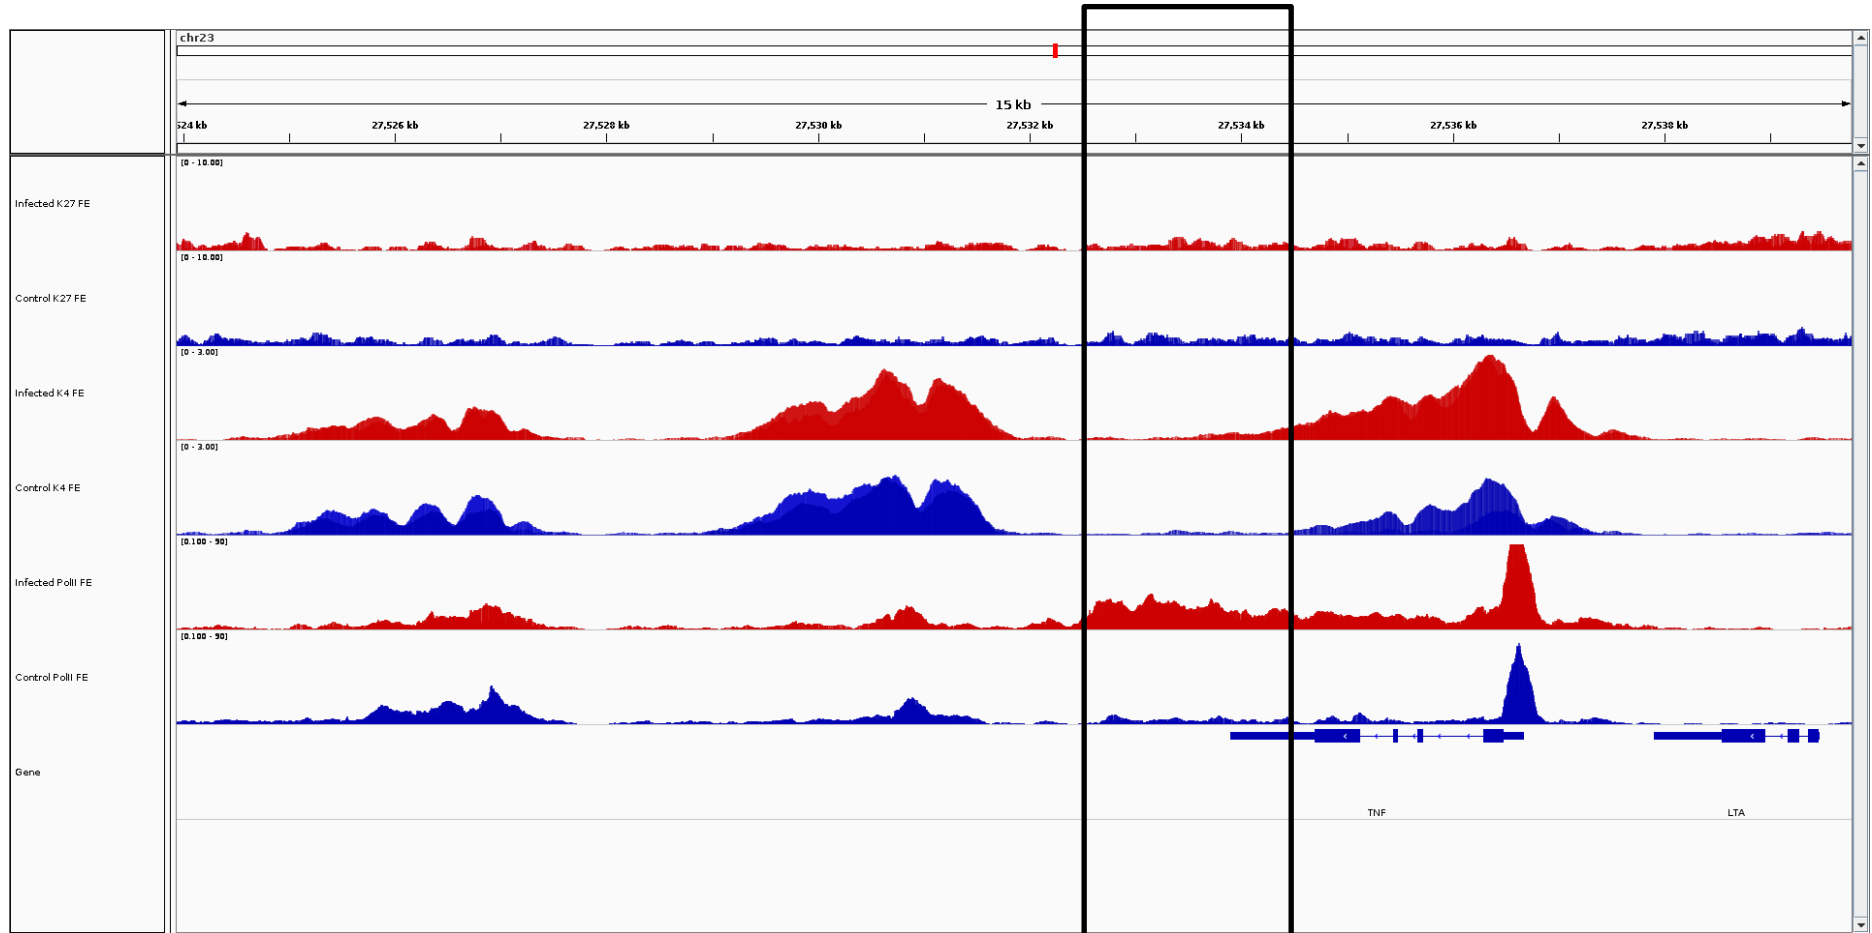

***TNF***

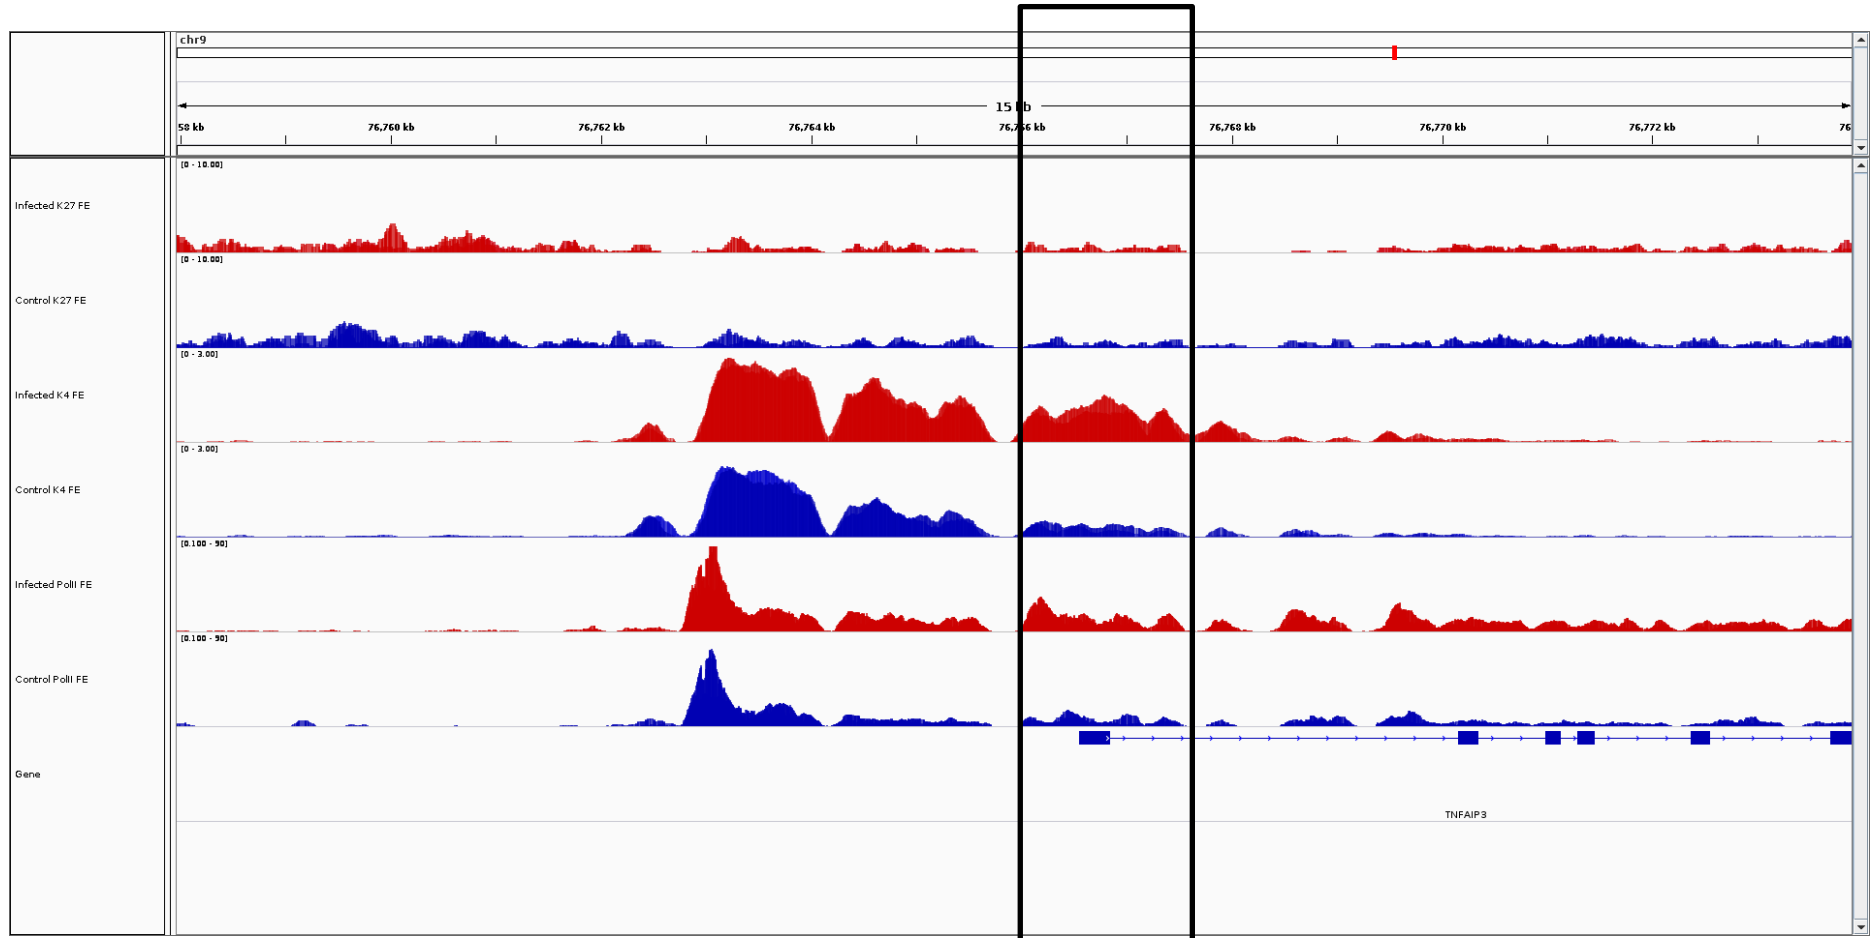

***TNFAIP3***

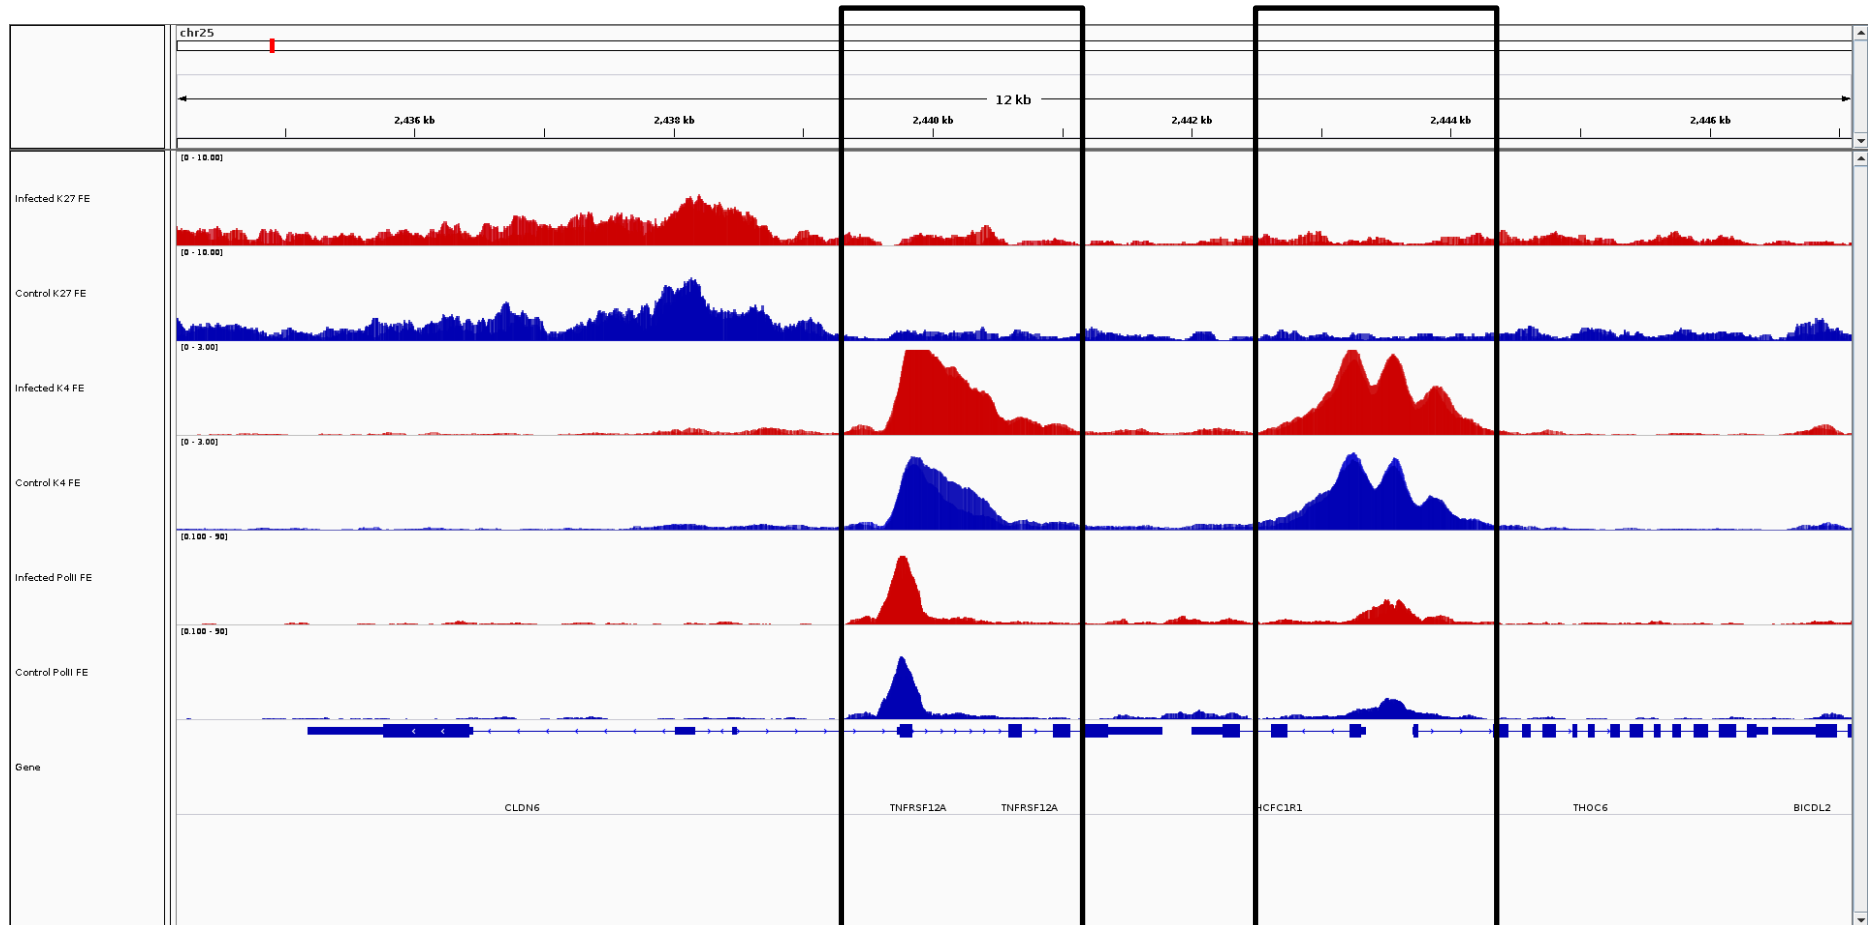

***TNFRSF12A***



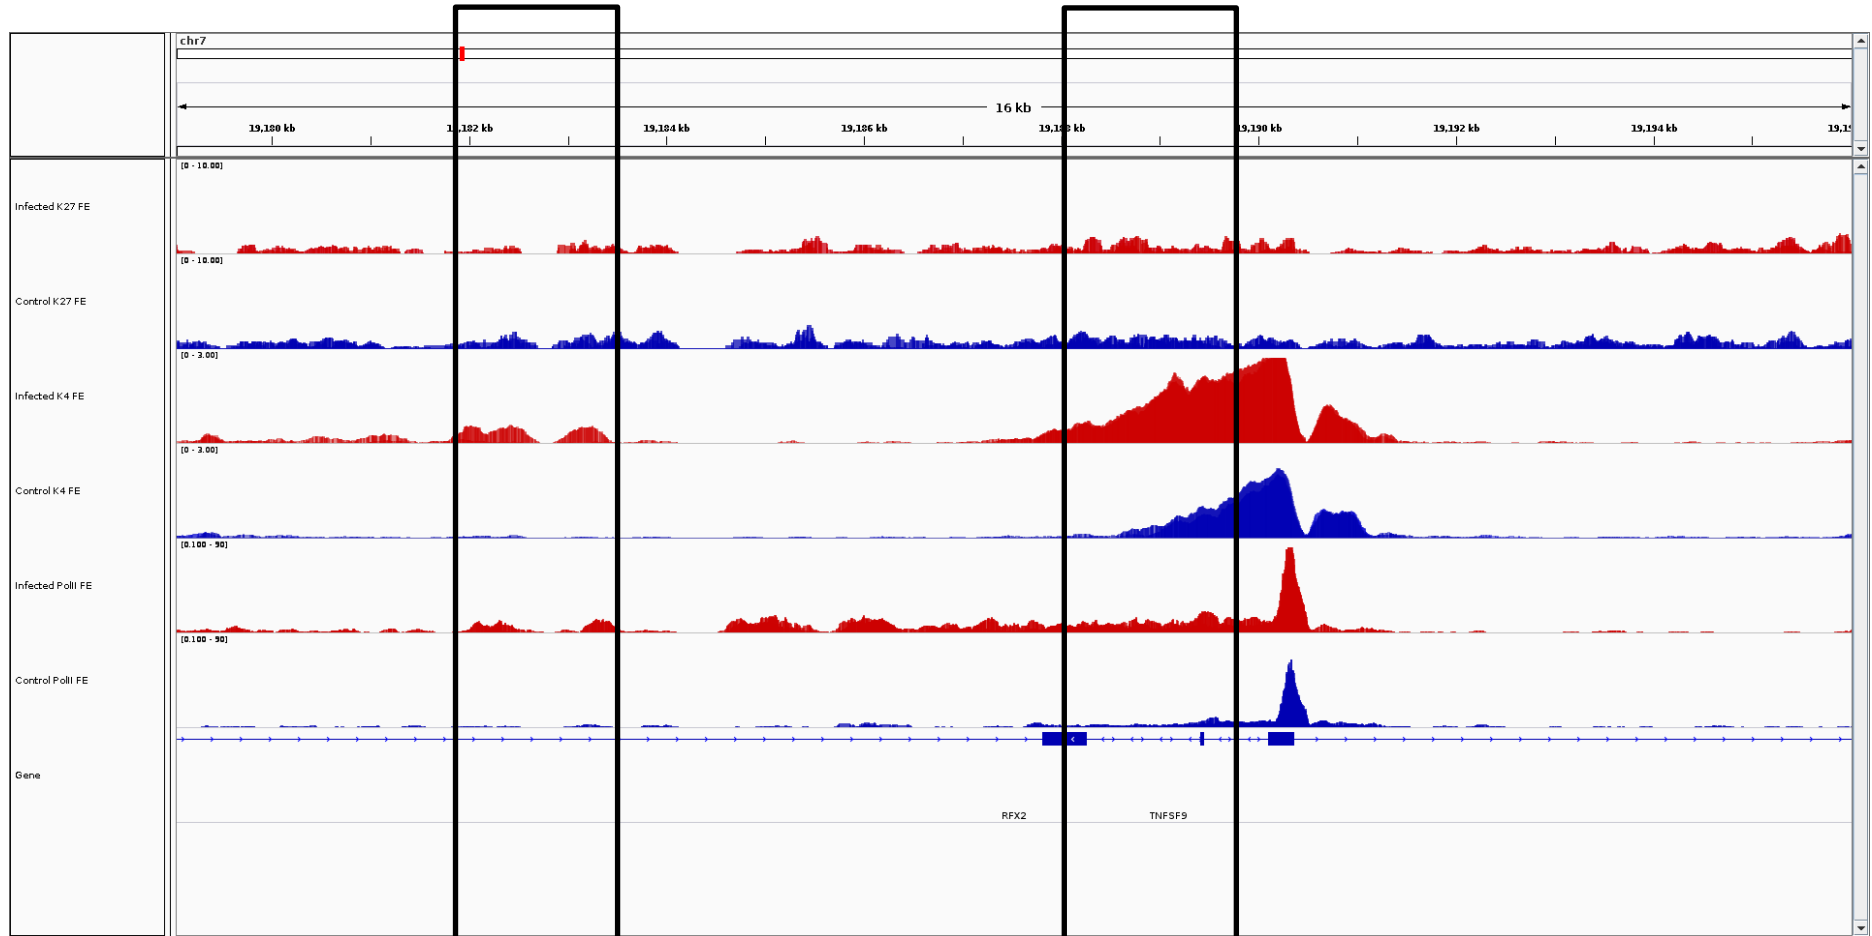

***TNFSF9***

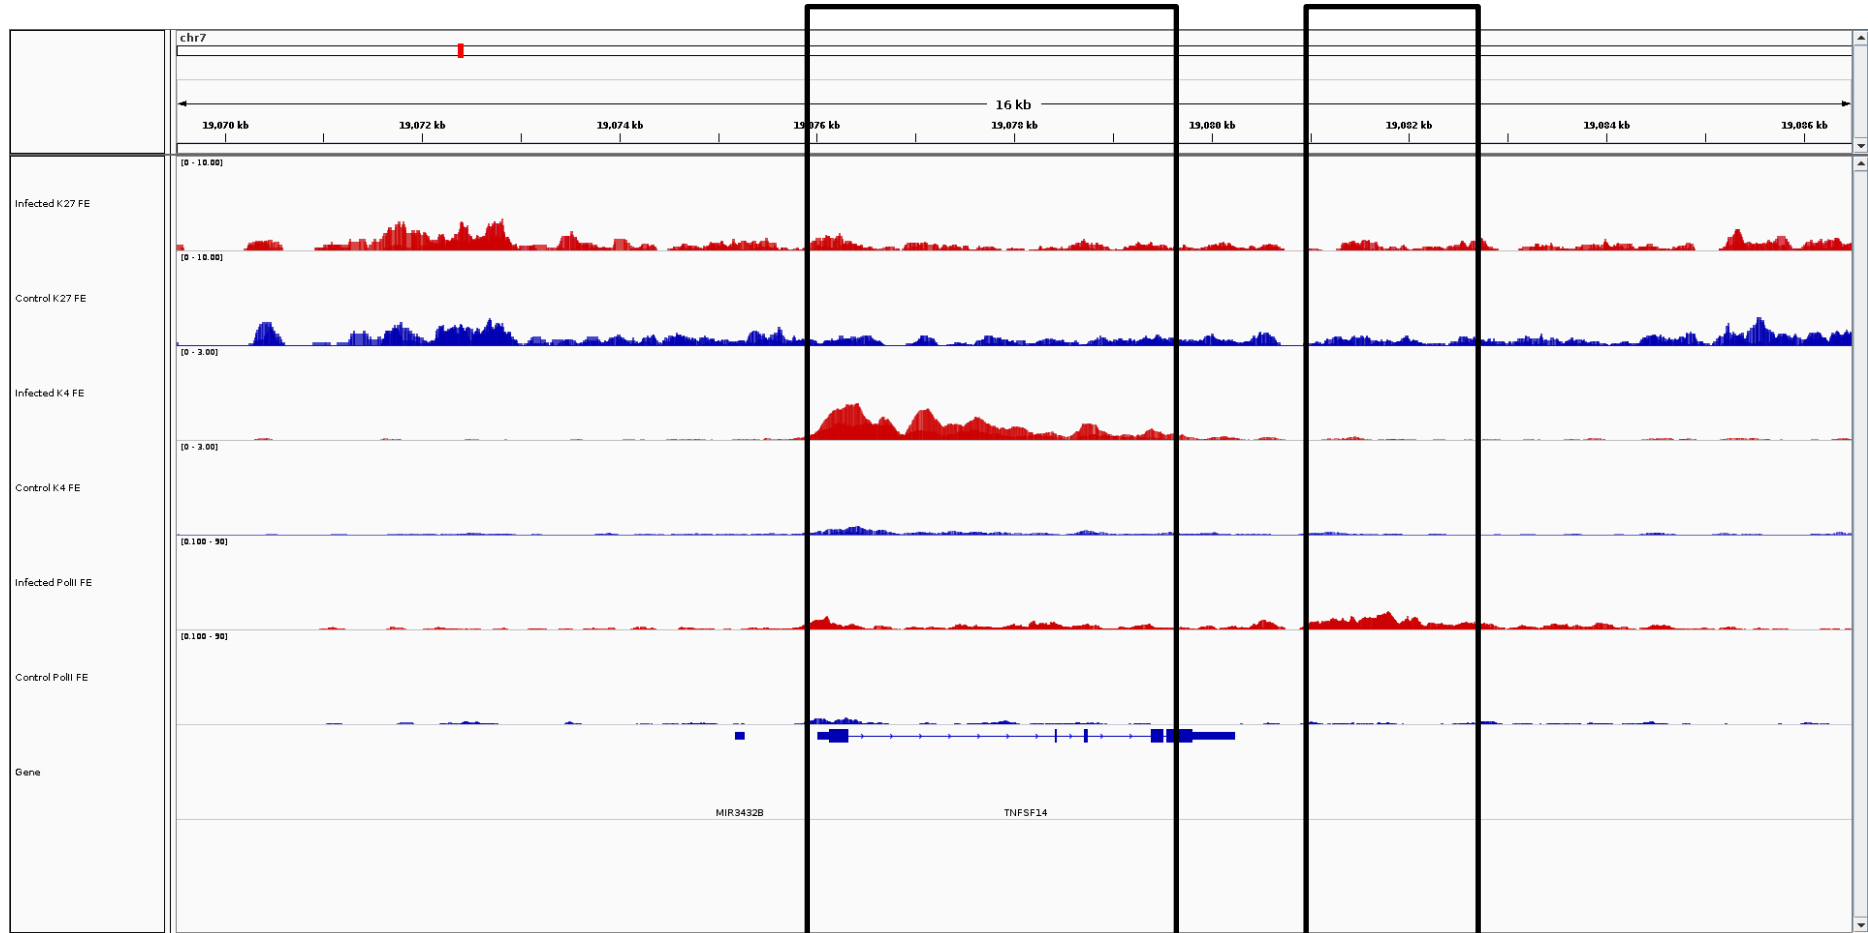

***TNFSF14***

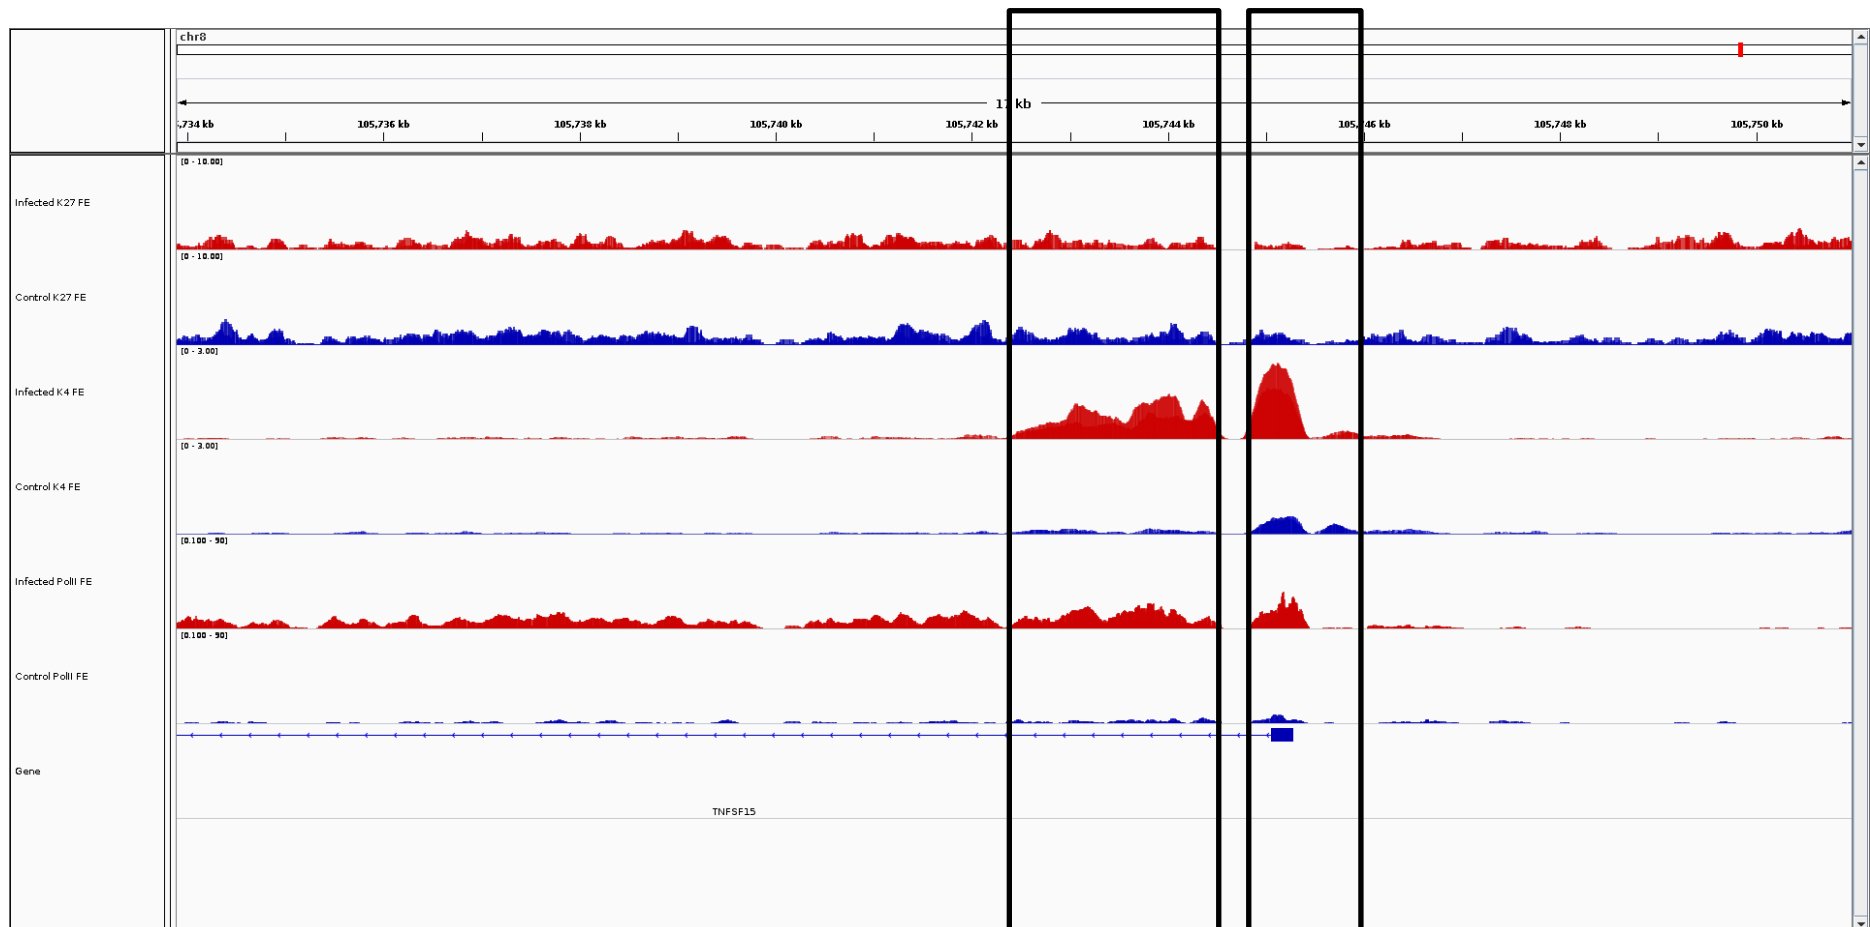

***TNFSF15***

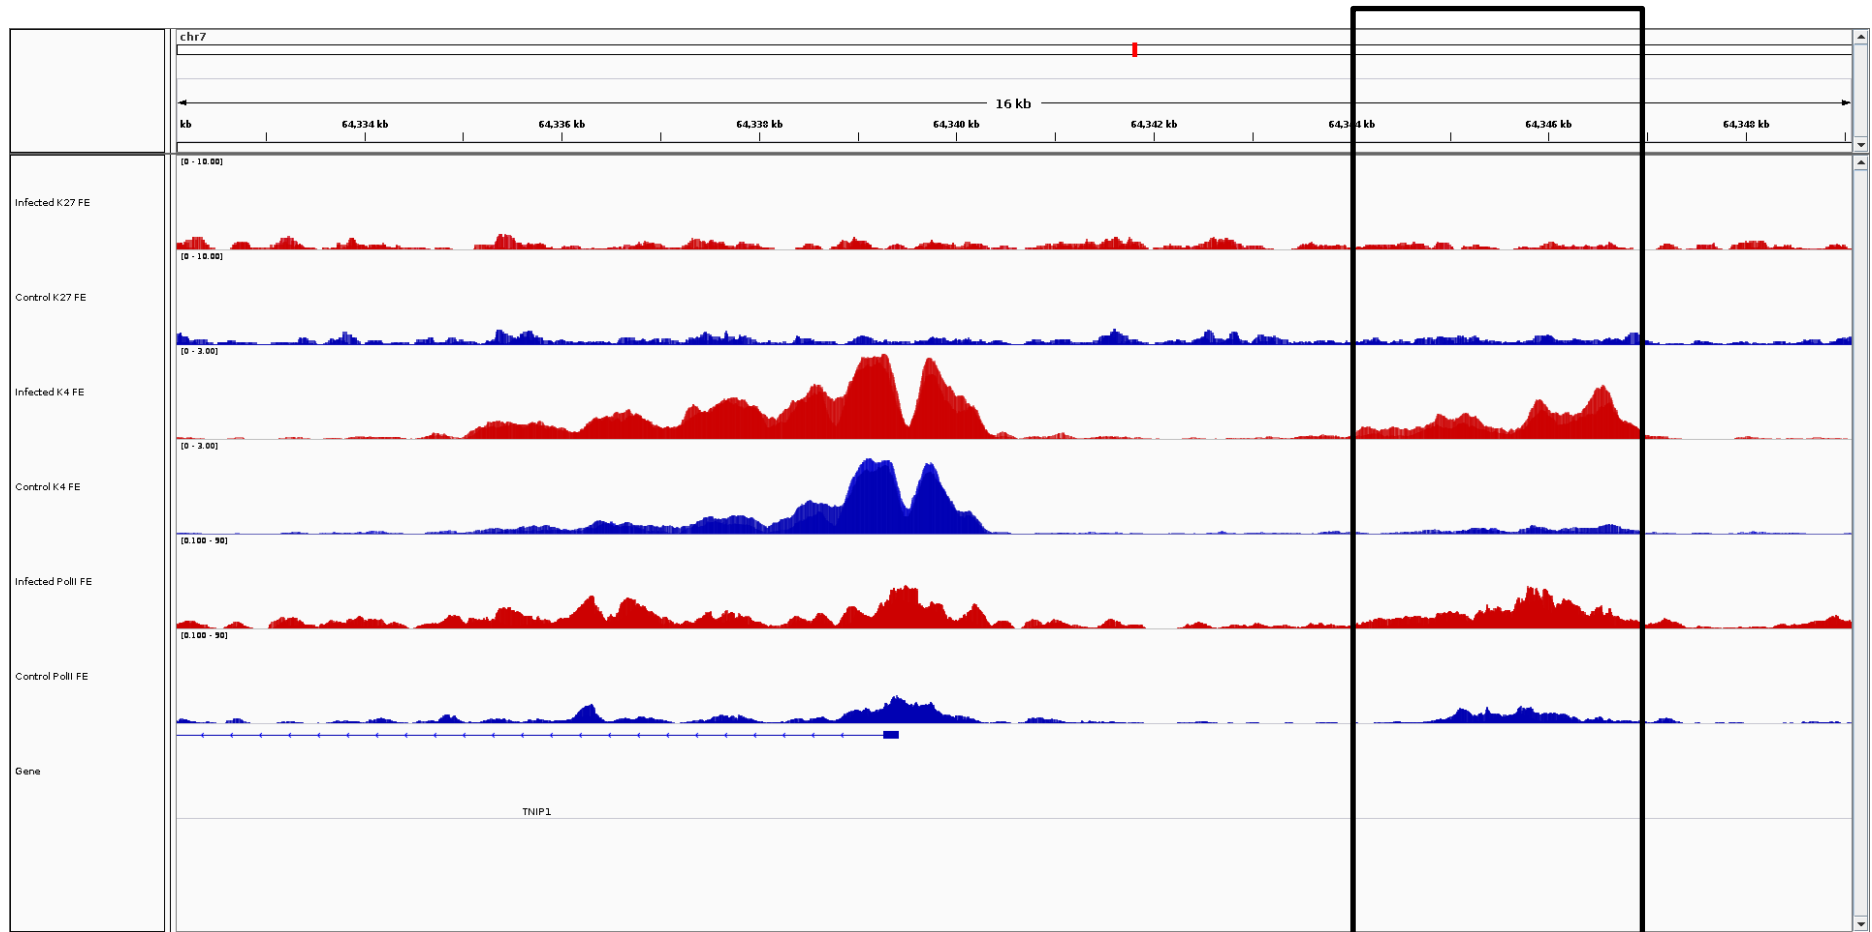

***TNIP1***

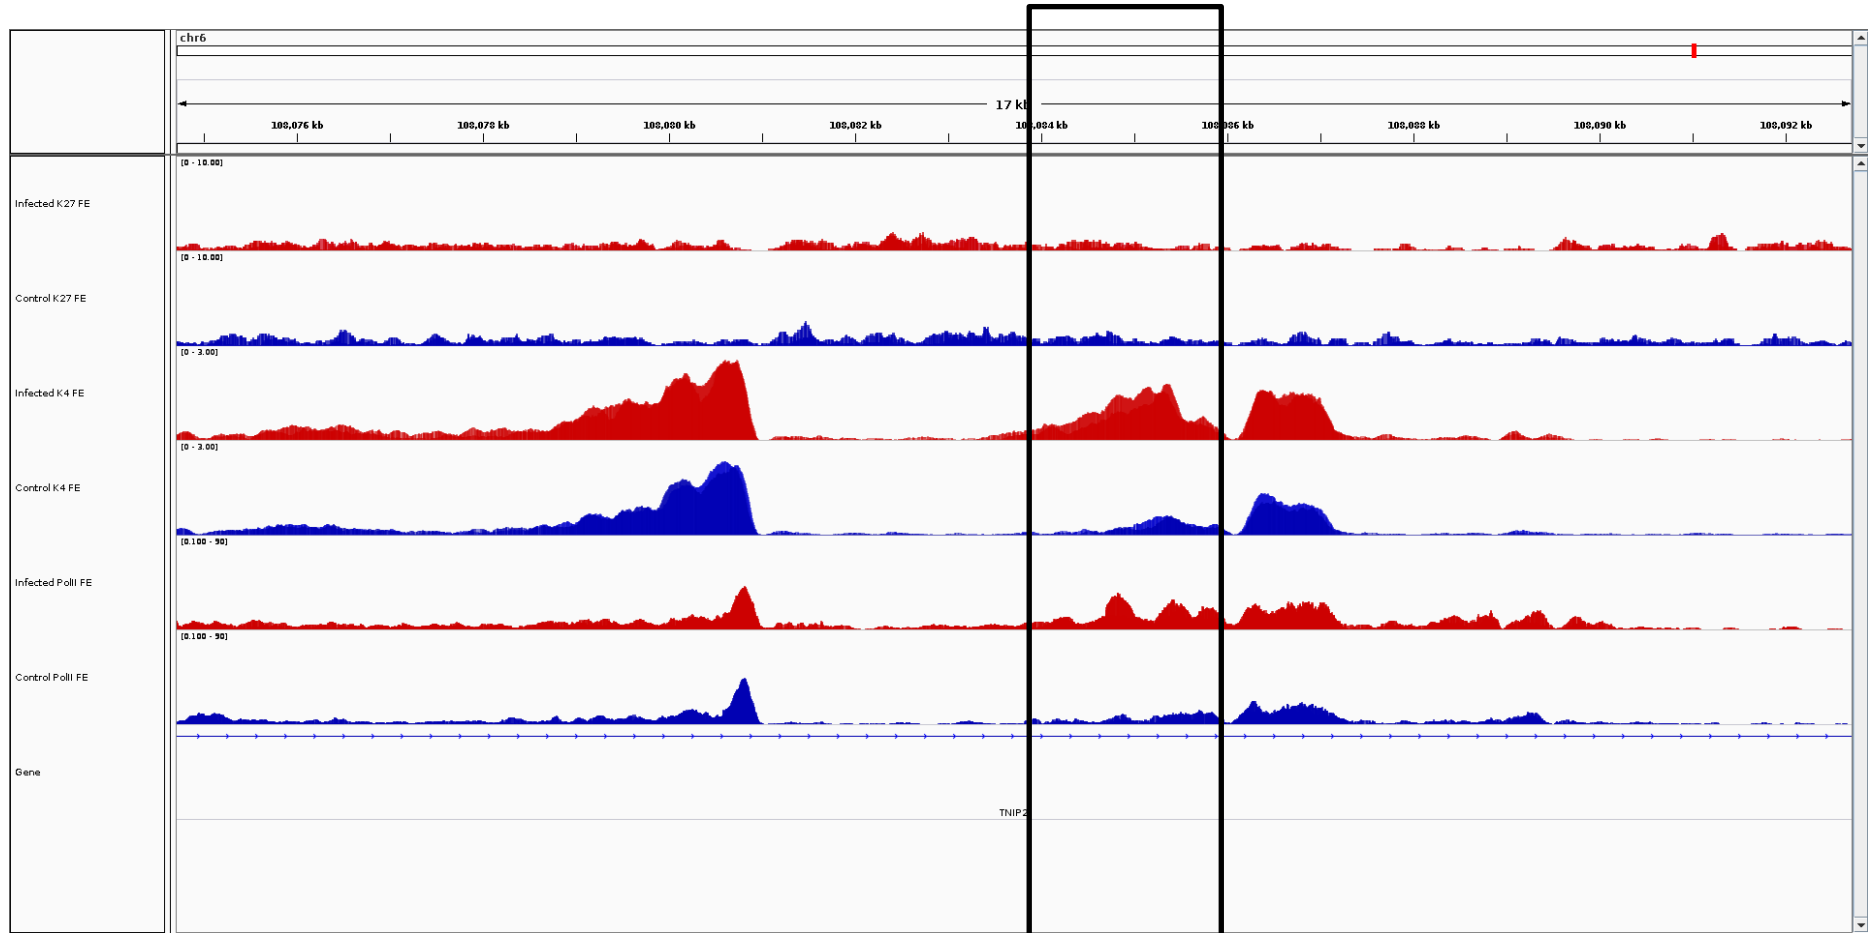

***TNIP2***

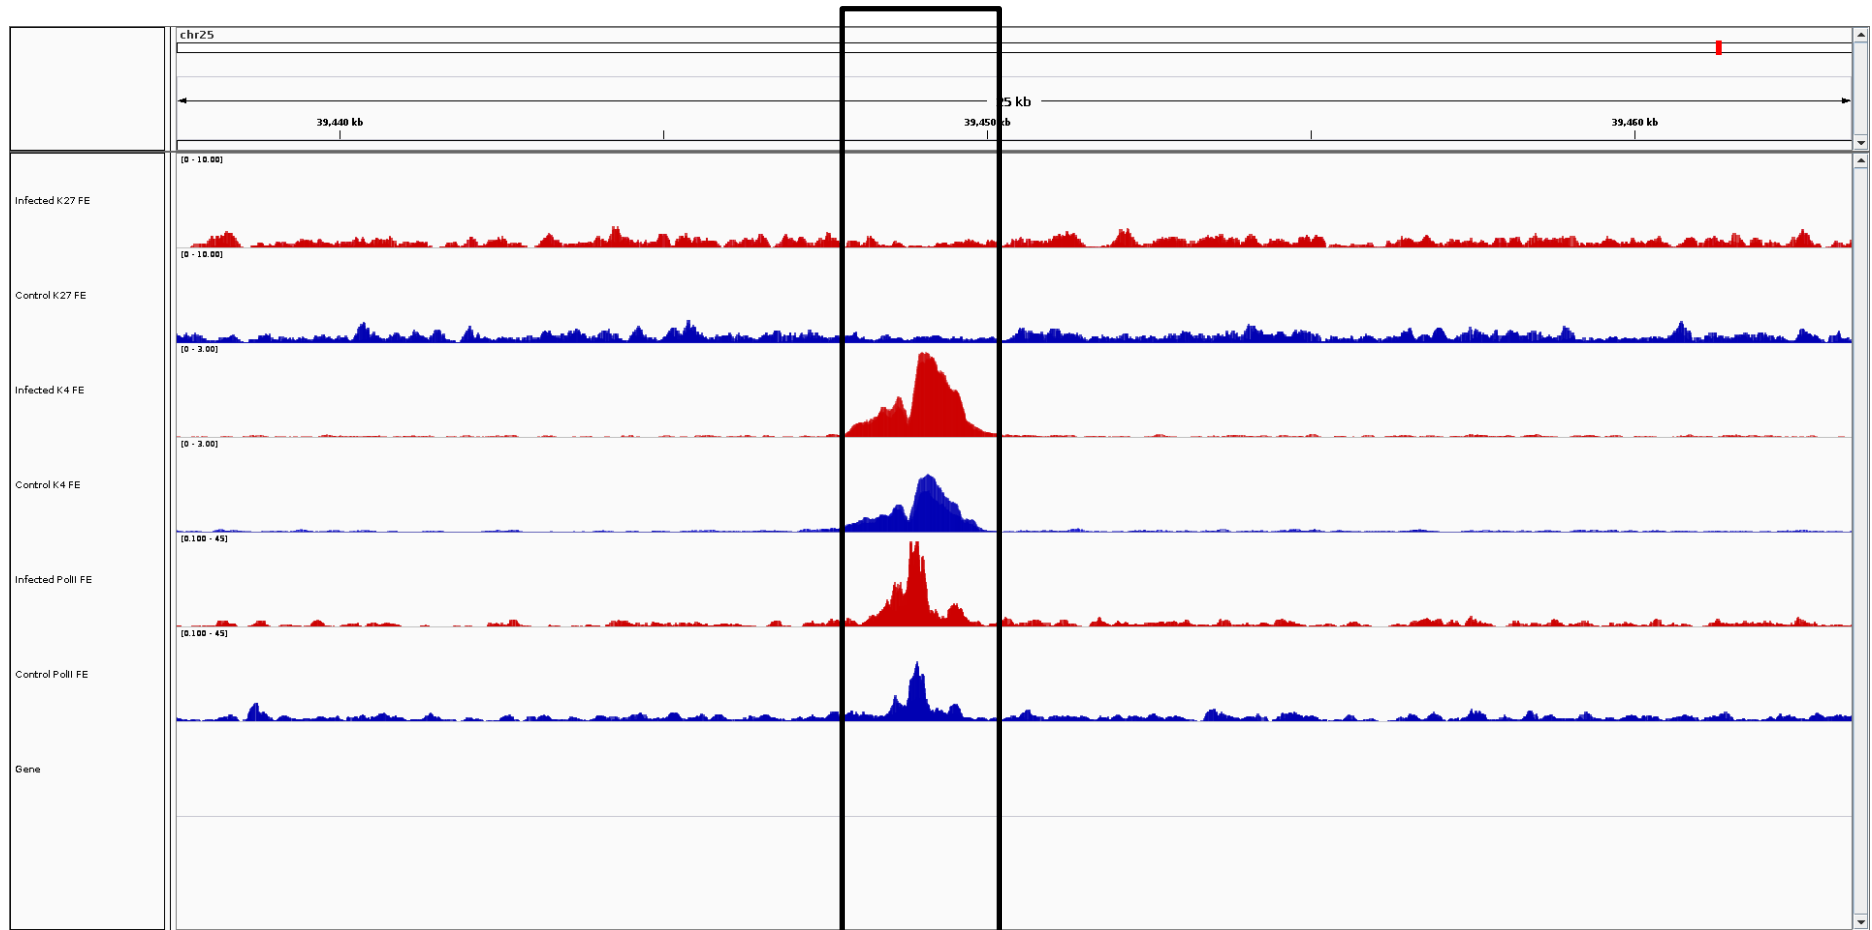

***TNRC18***

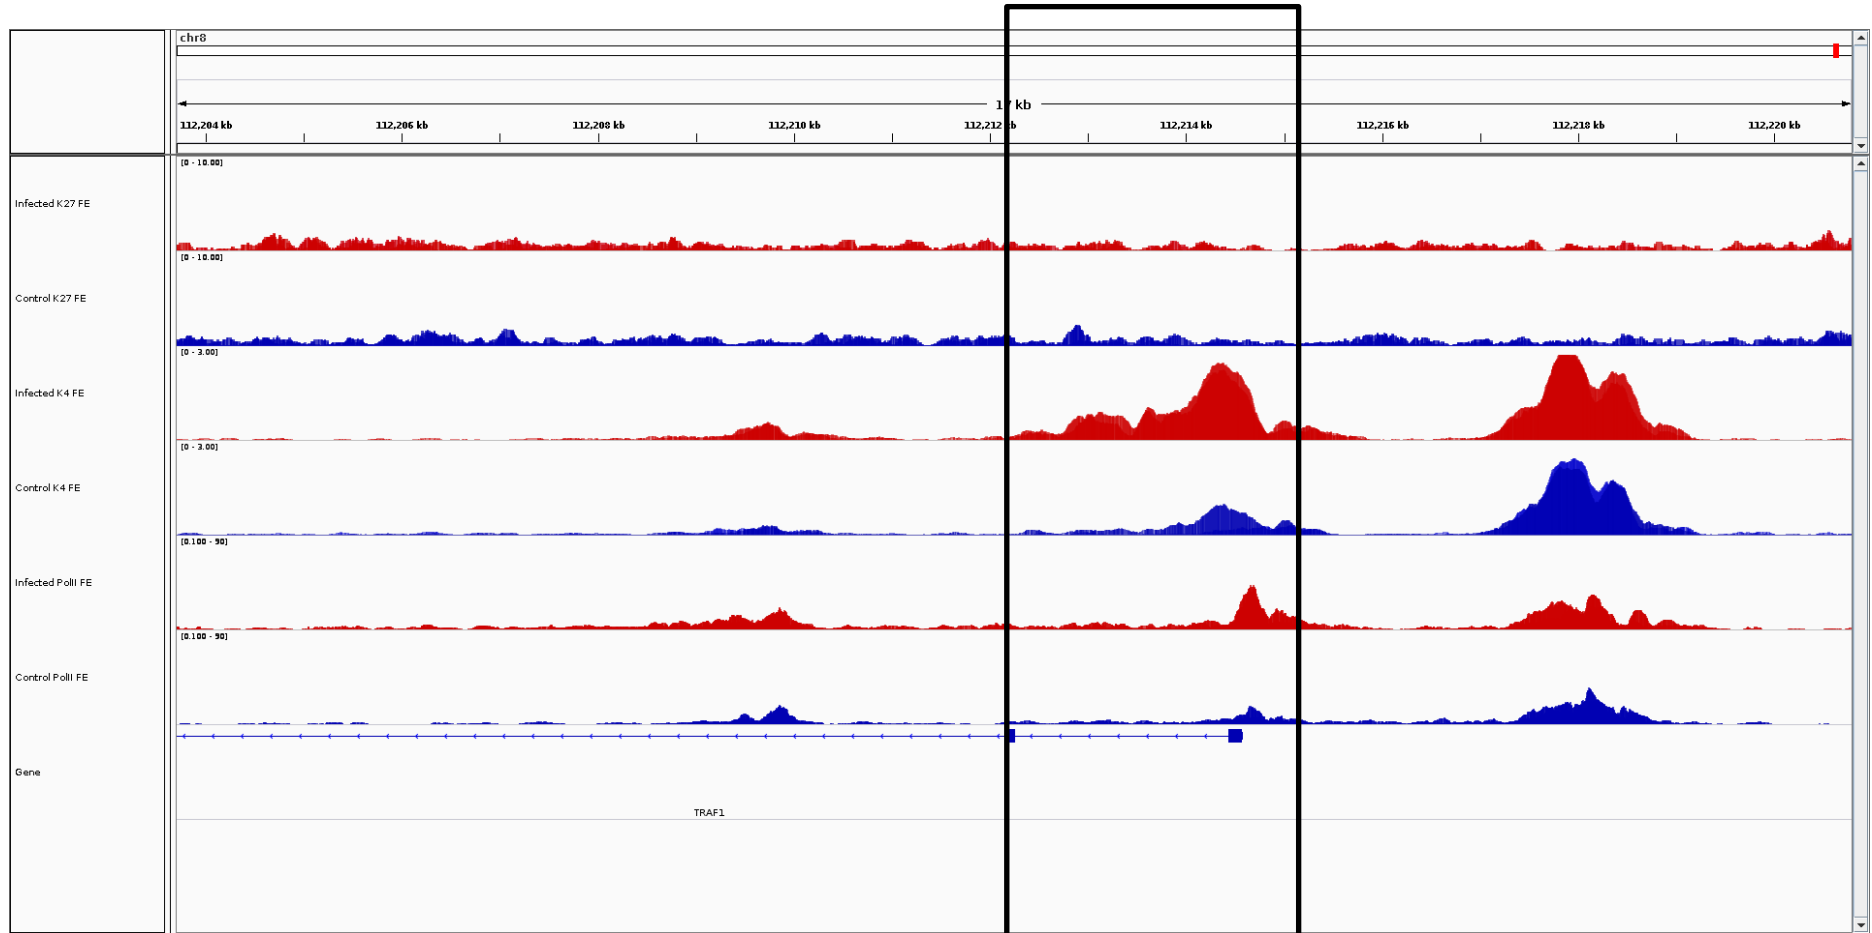

***TRAF1***

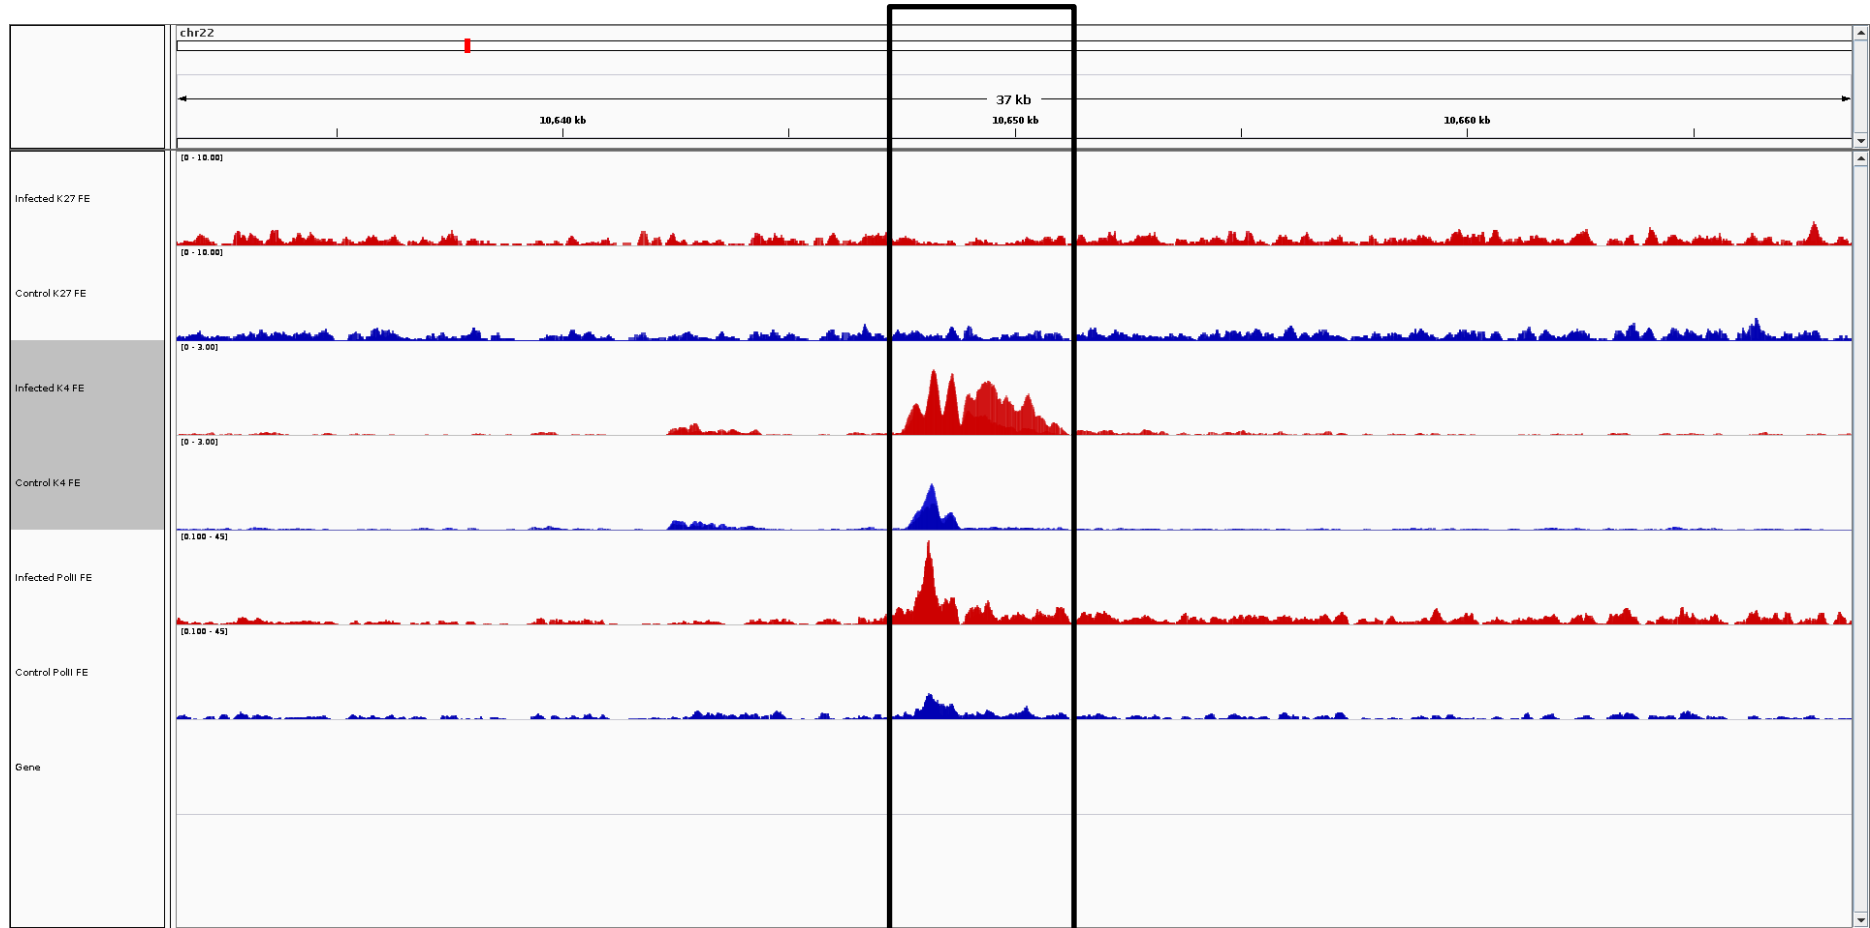

***TRANK1***



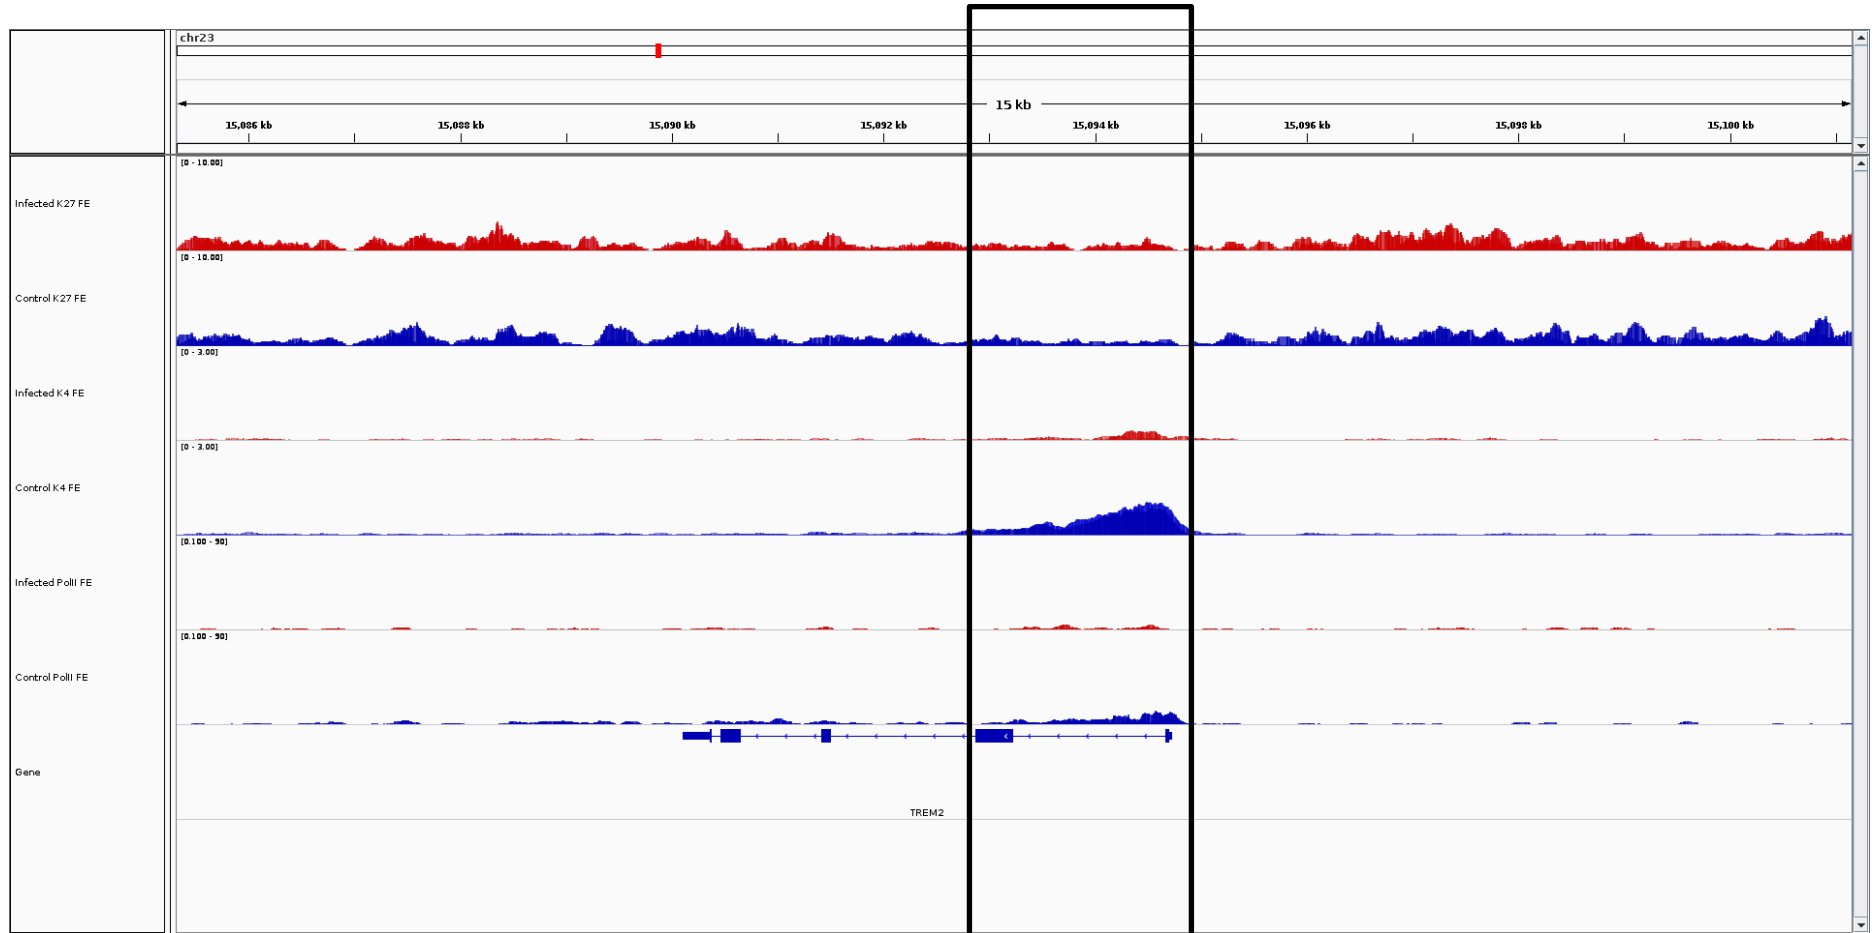

**TREM2**

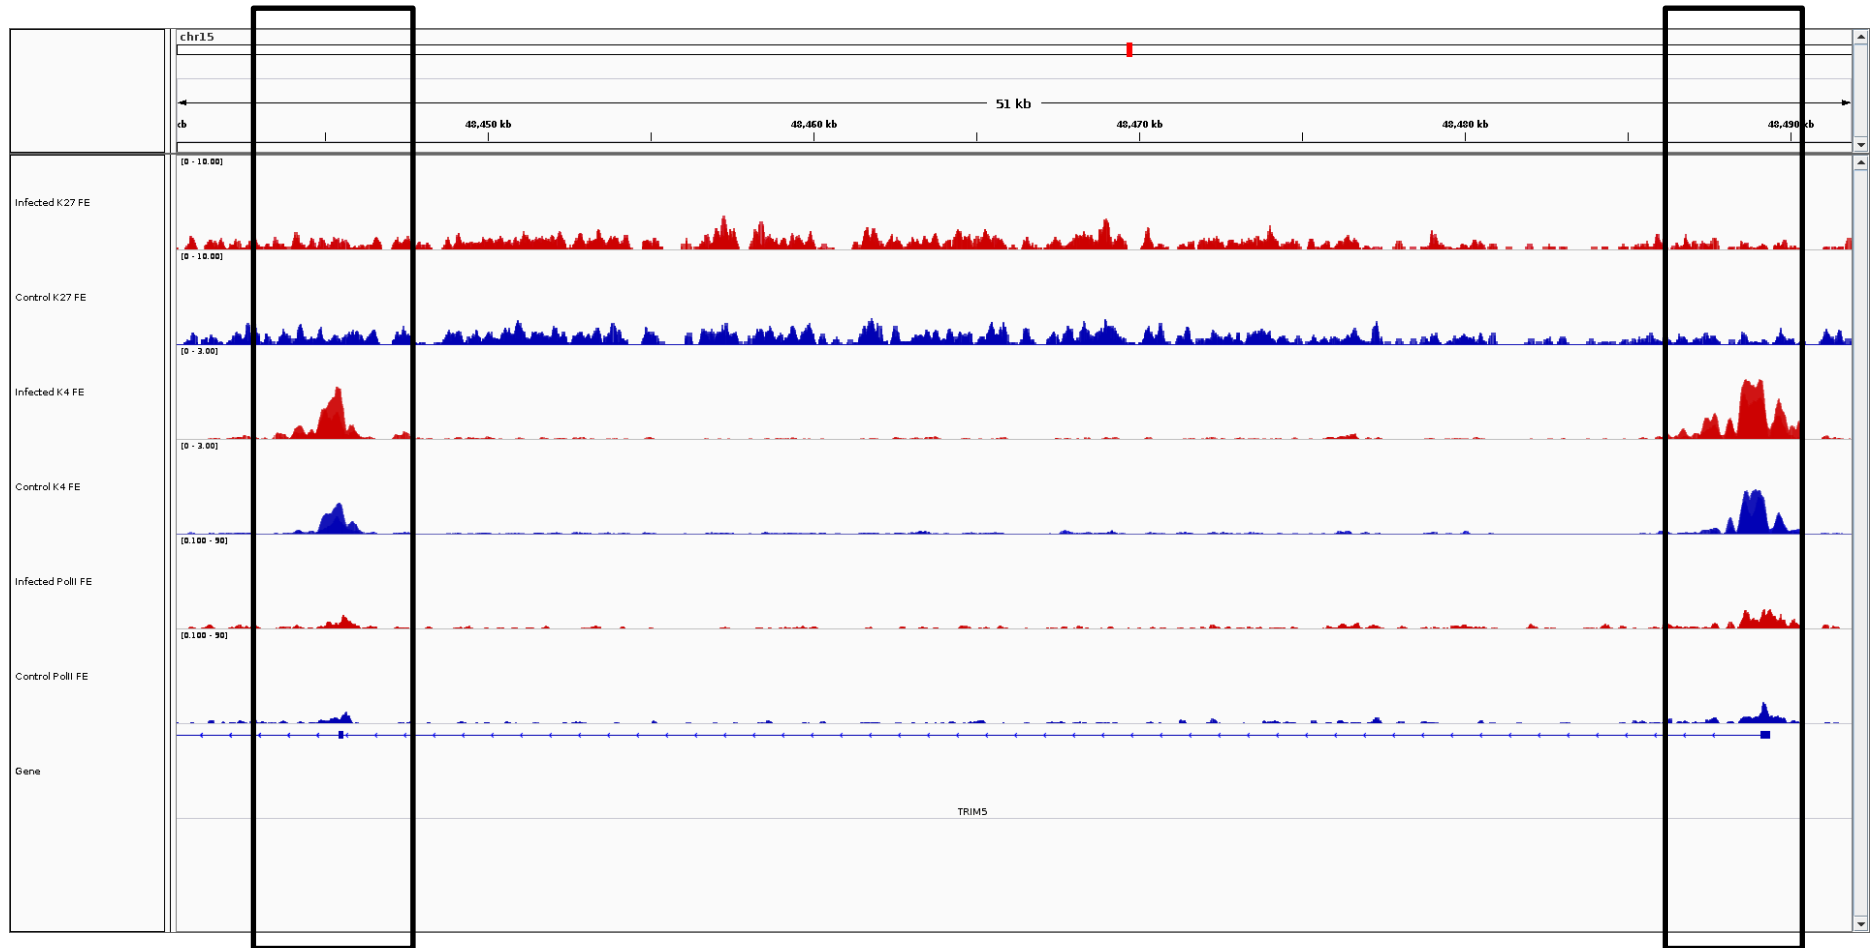

***TRIM5***

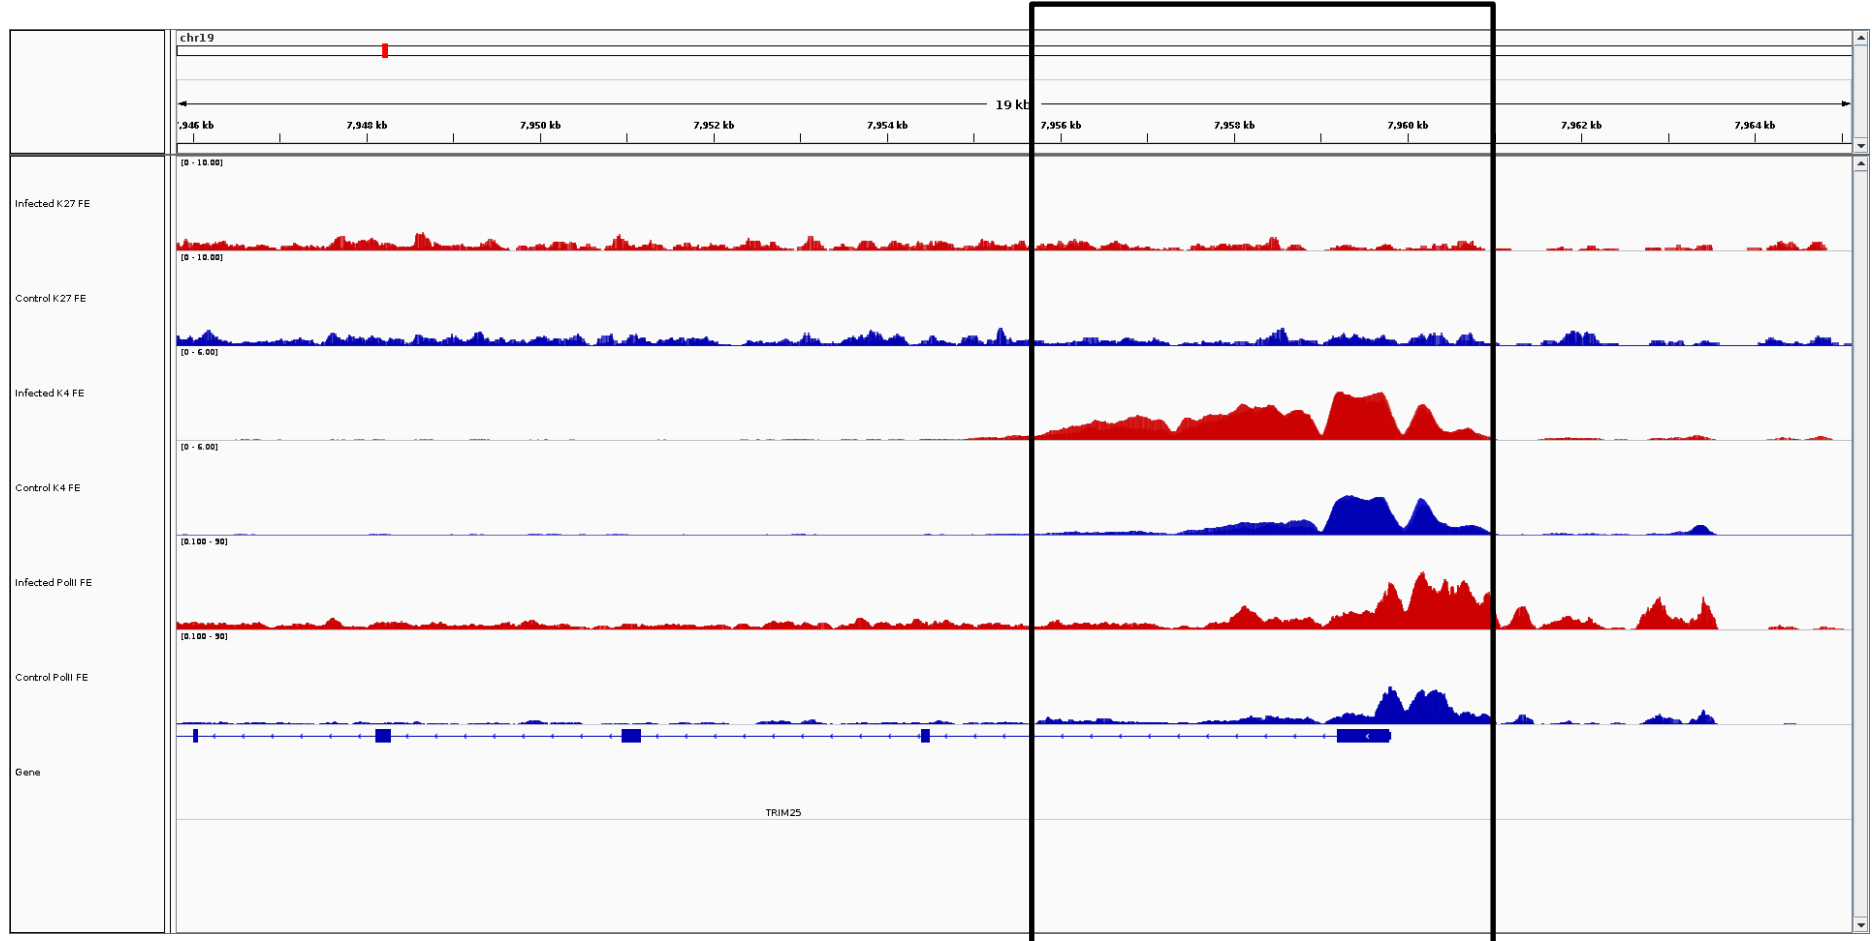

***TRIM25***

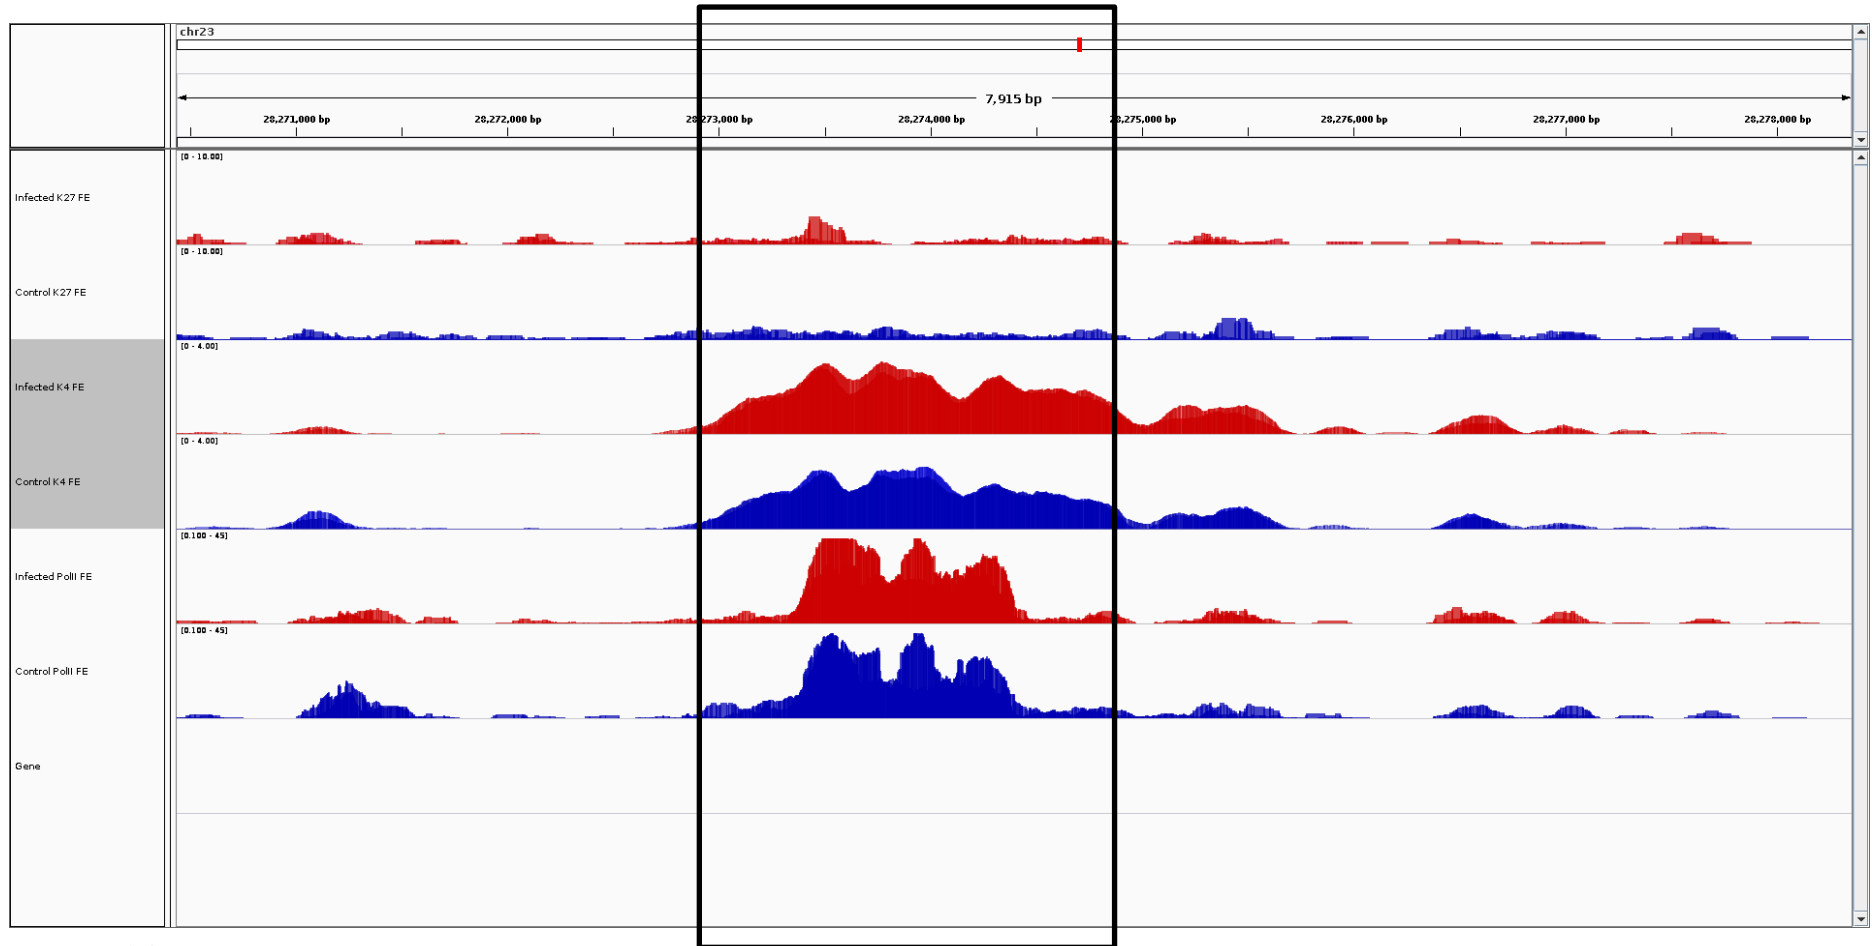

***TRIM39***

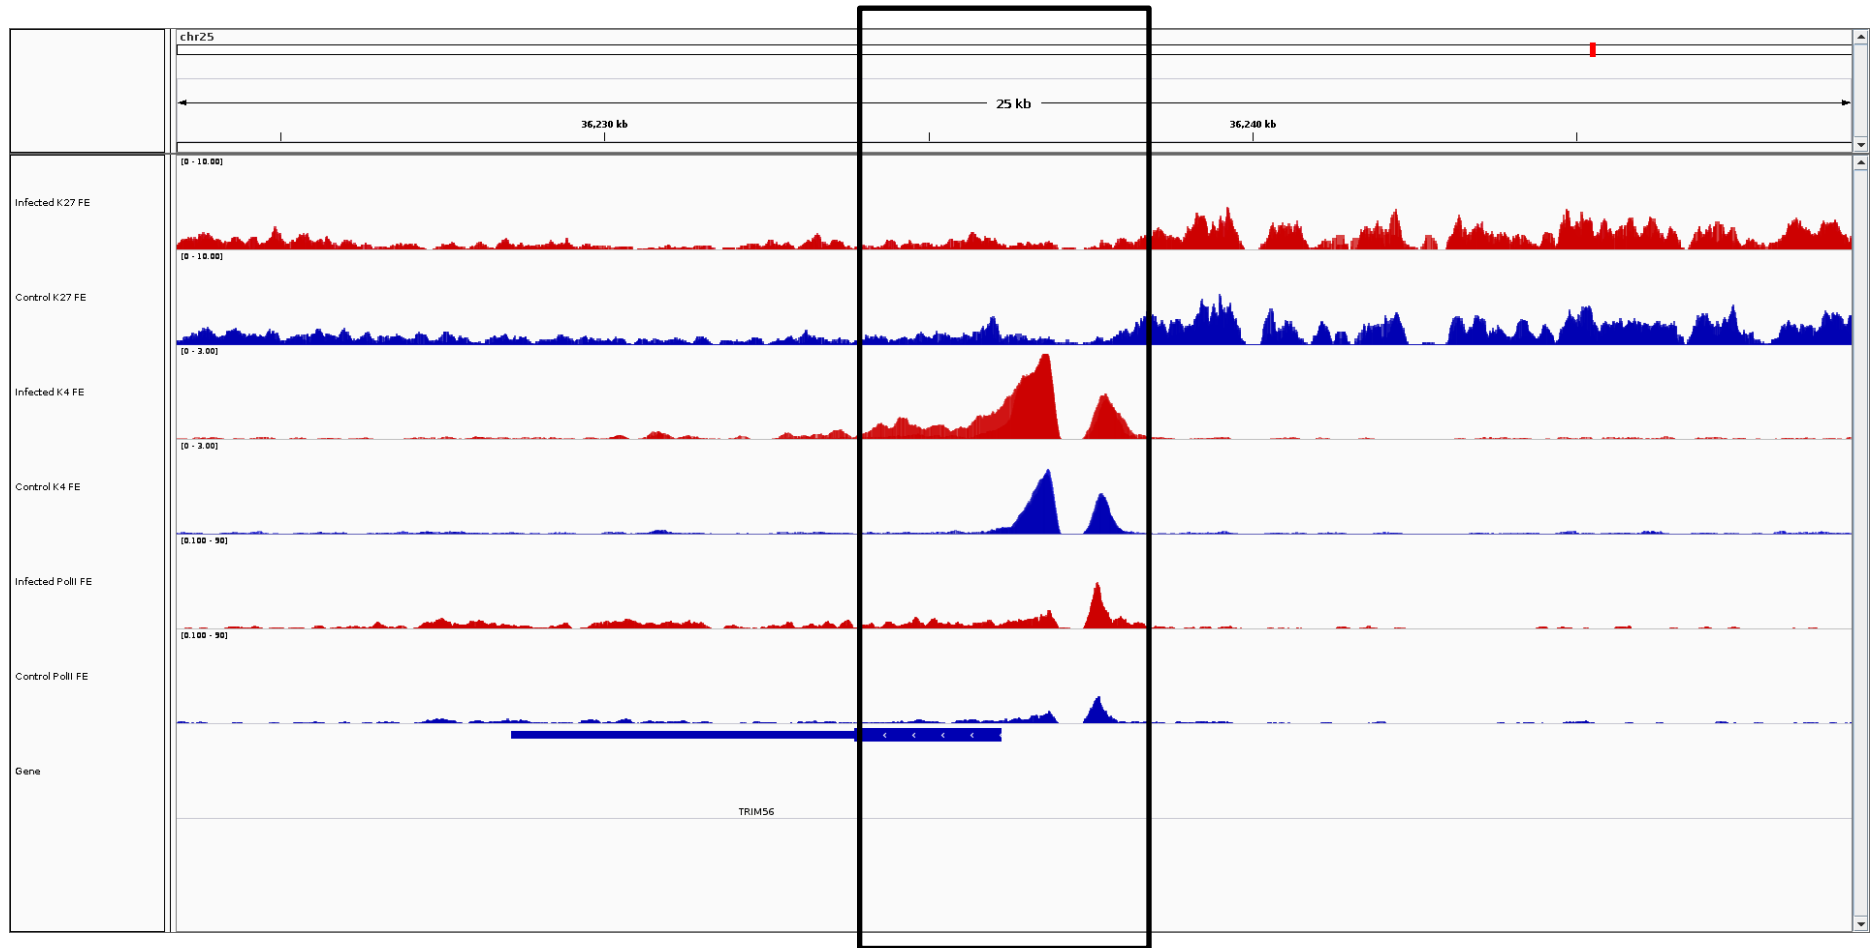

***TRIM56***

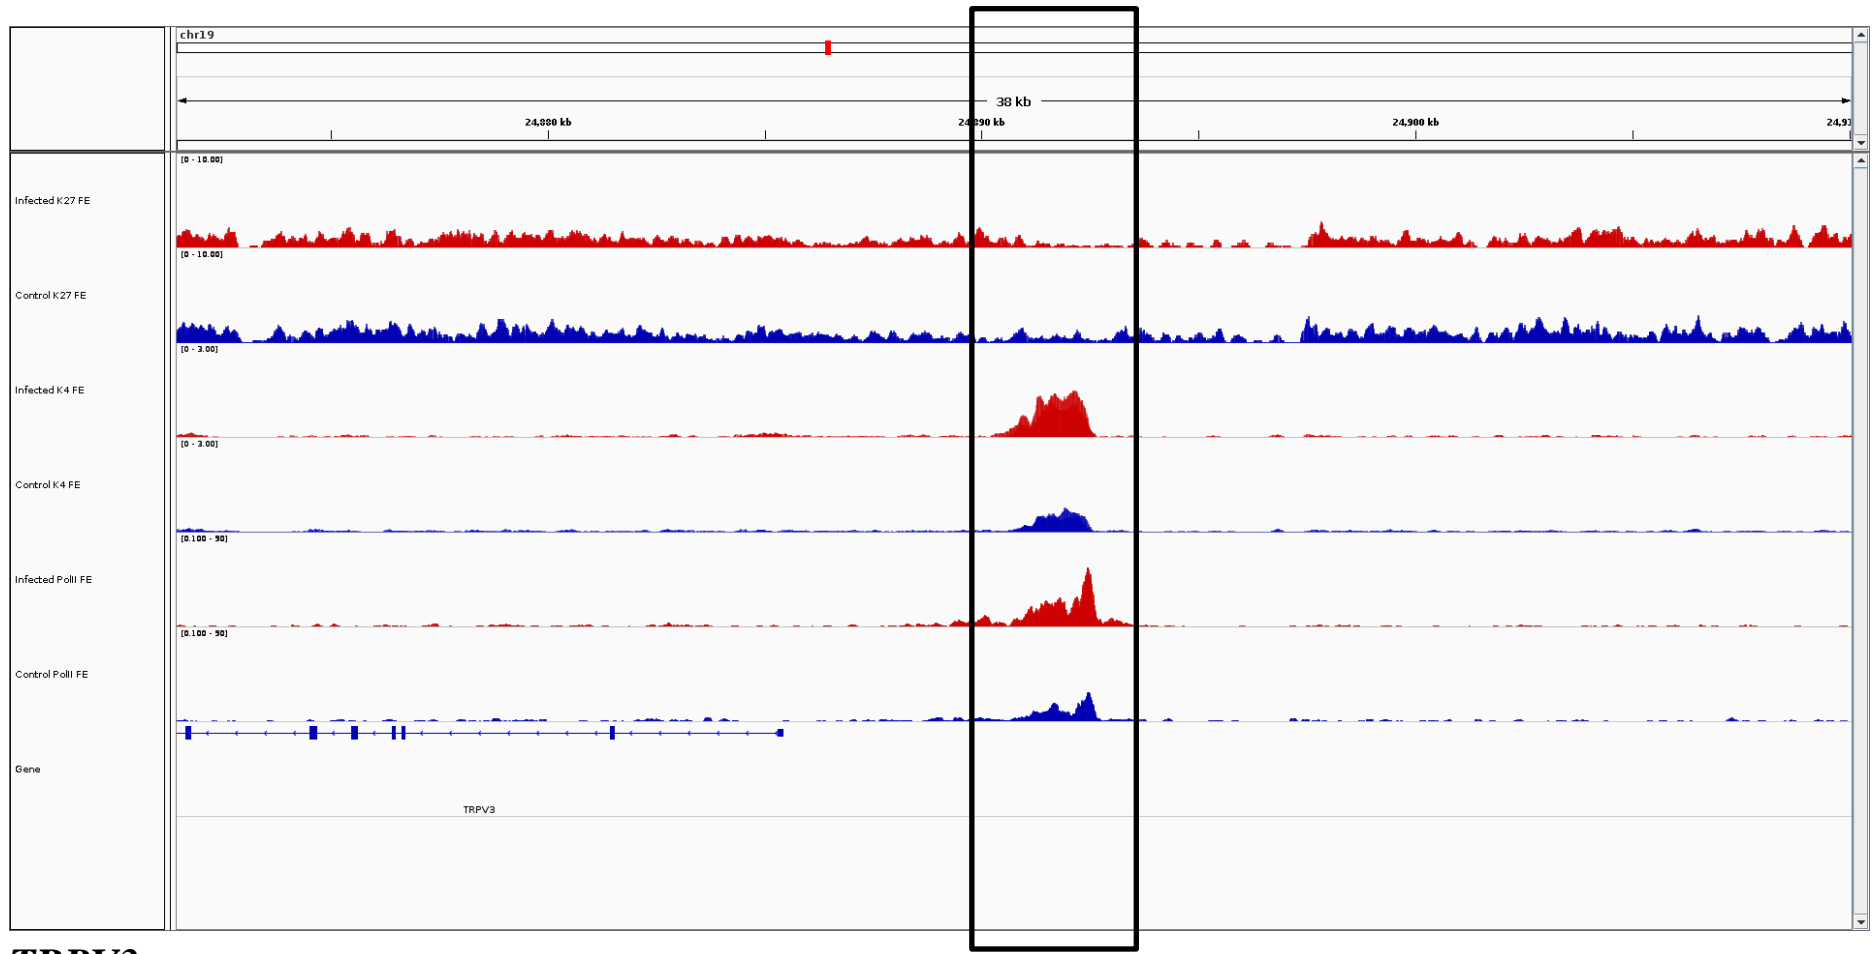

***TRPV3***

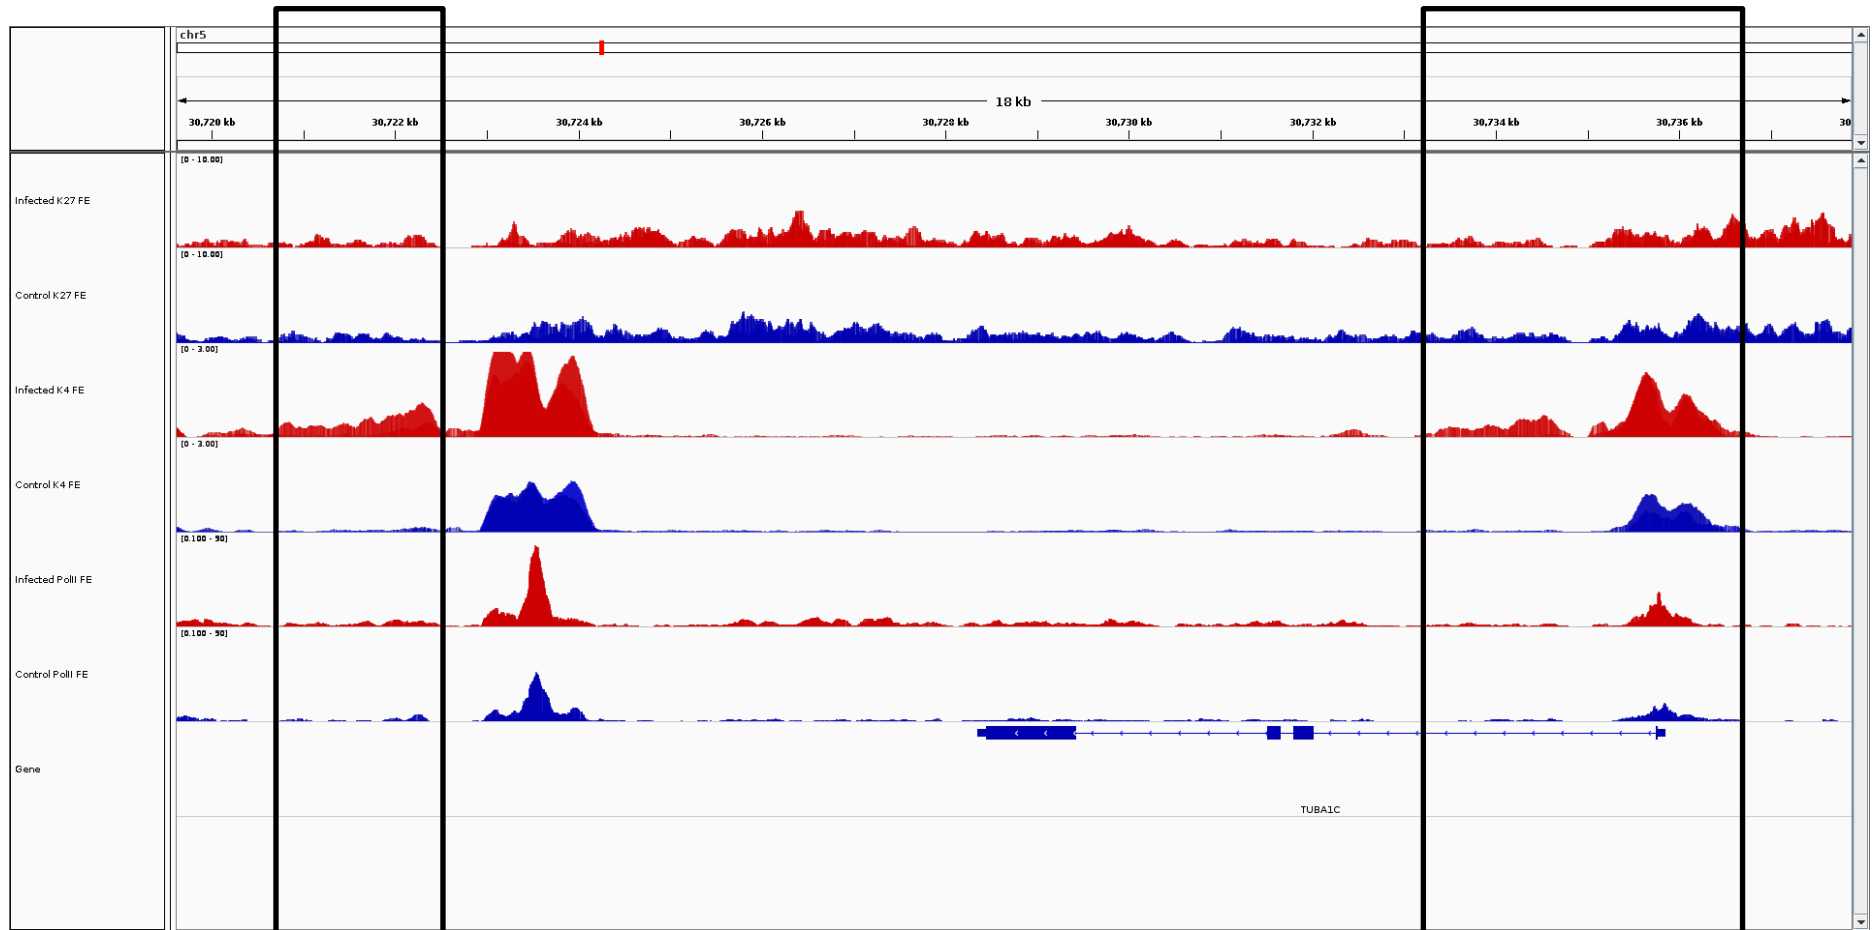

*TUBA1C*

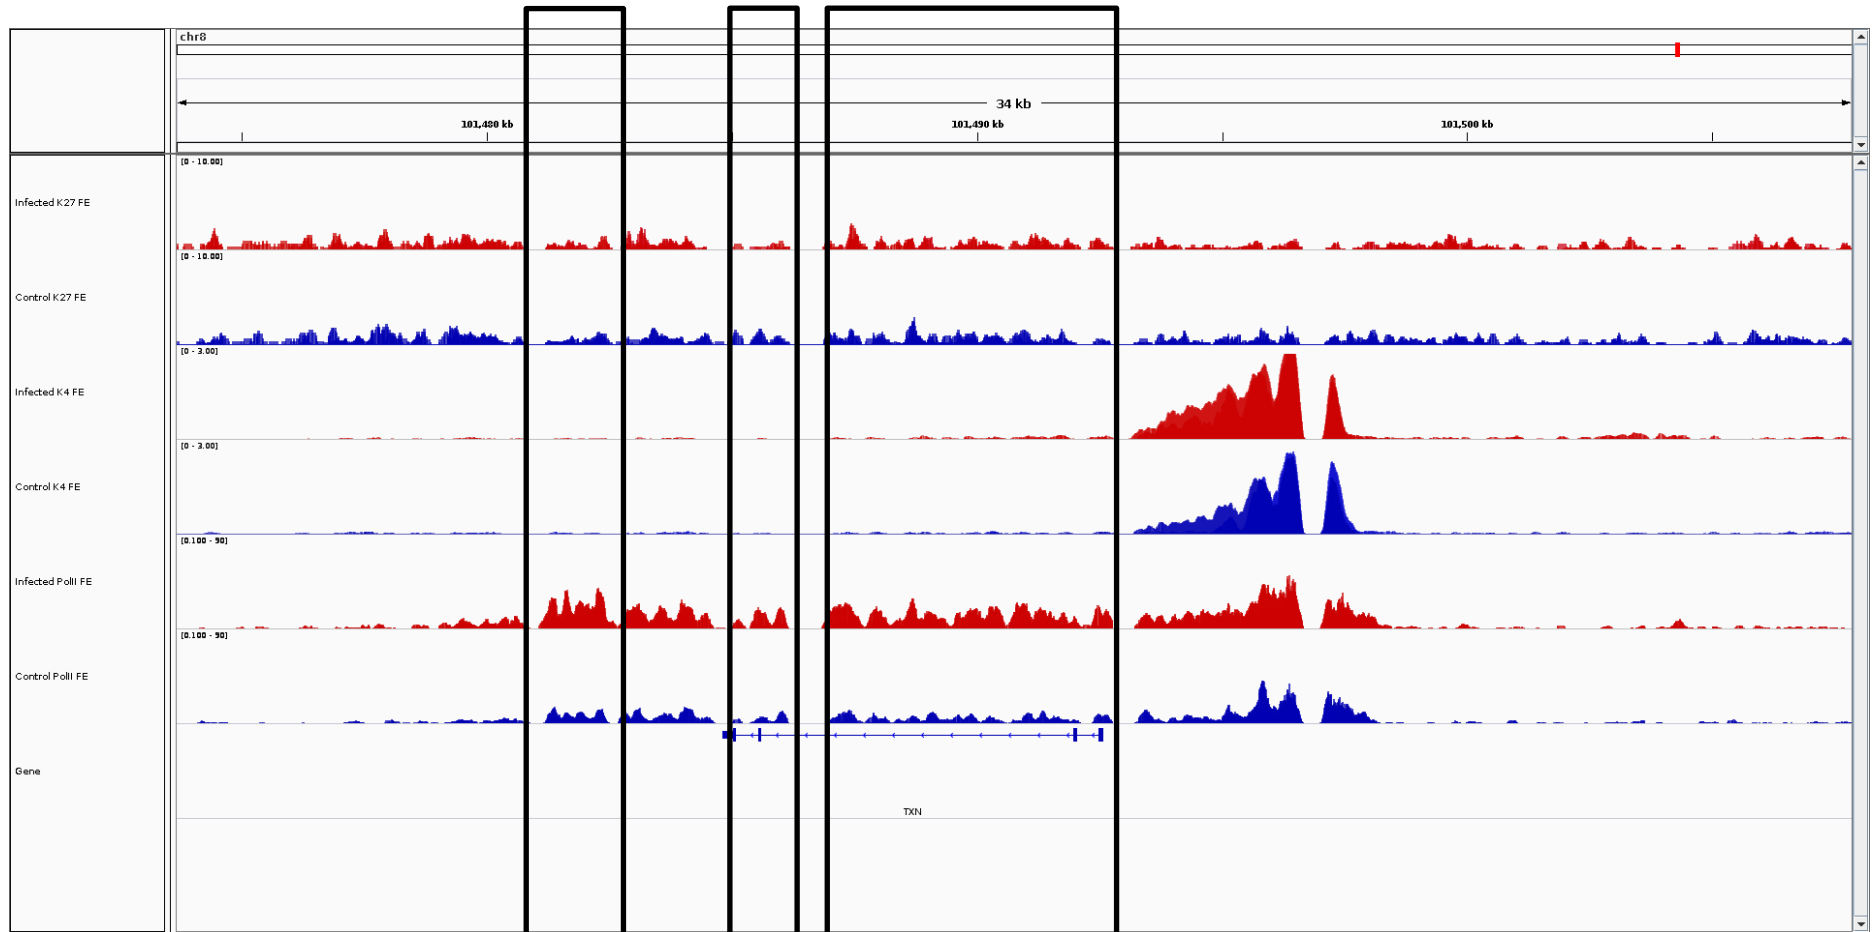

***TXN***



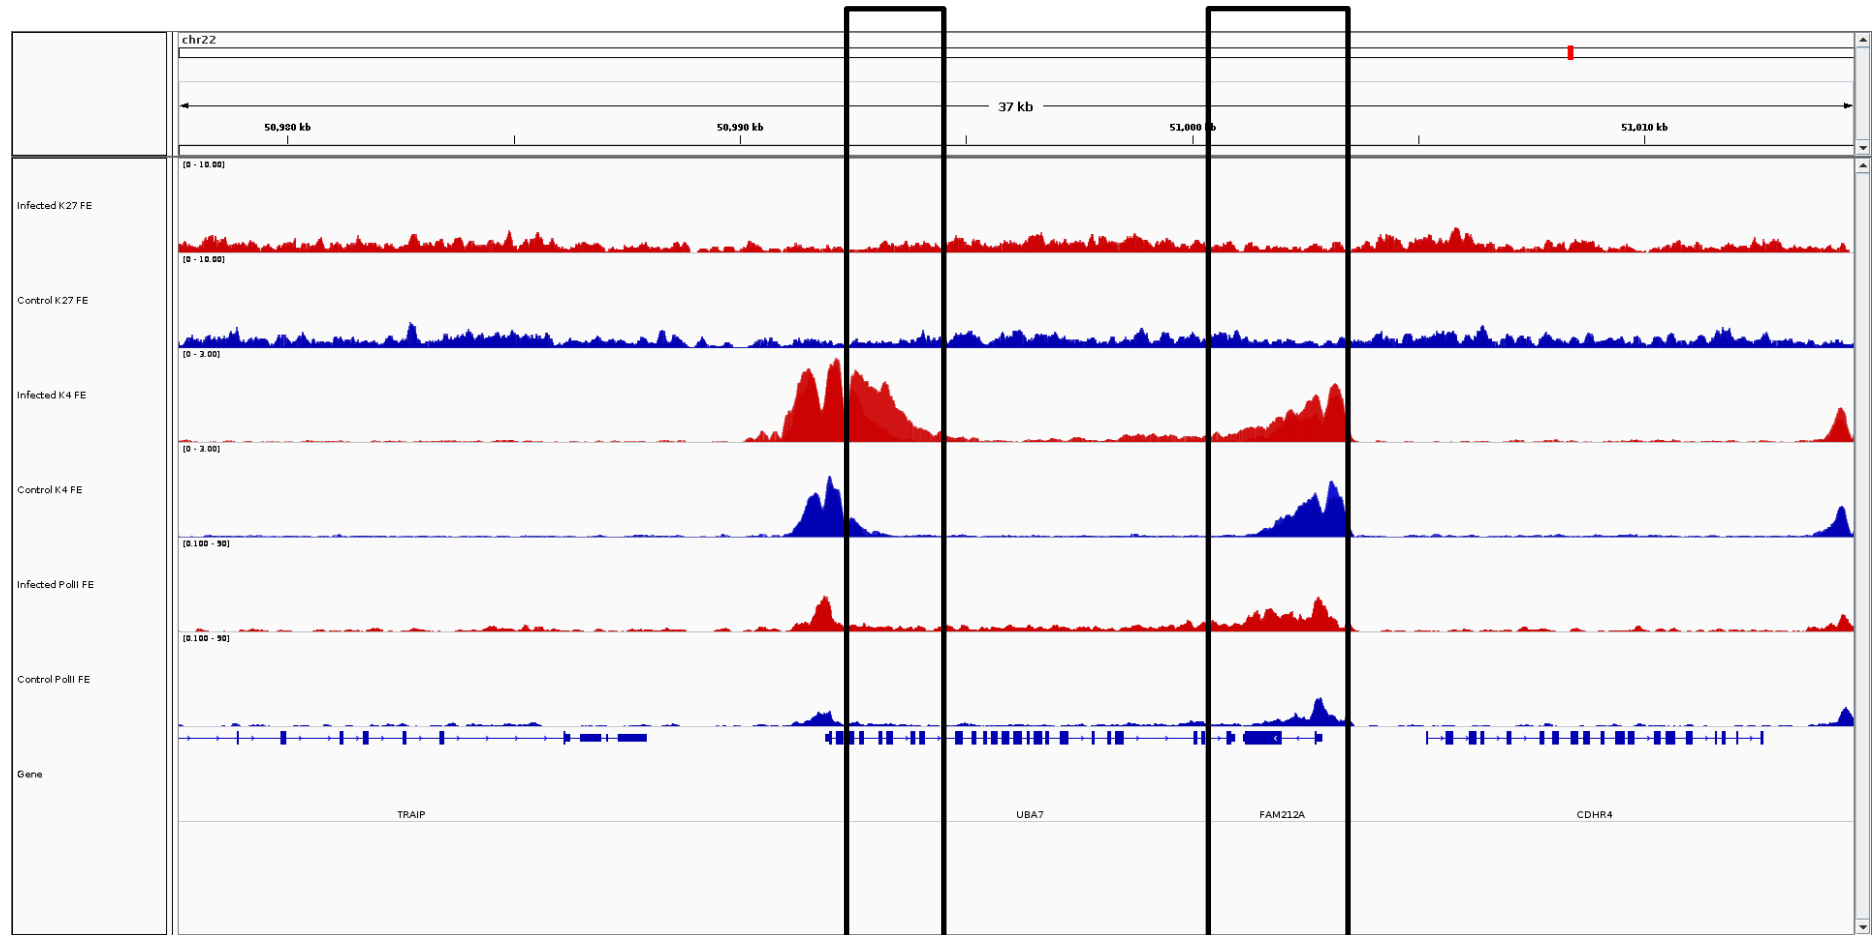

***UBA7***

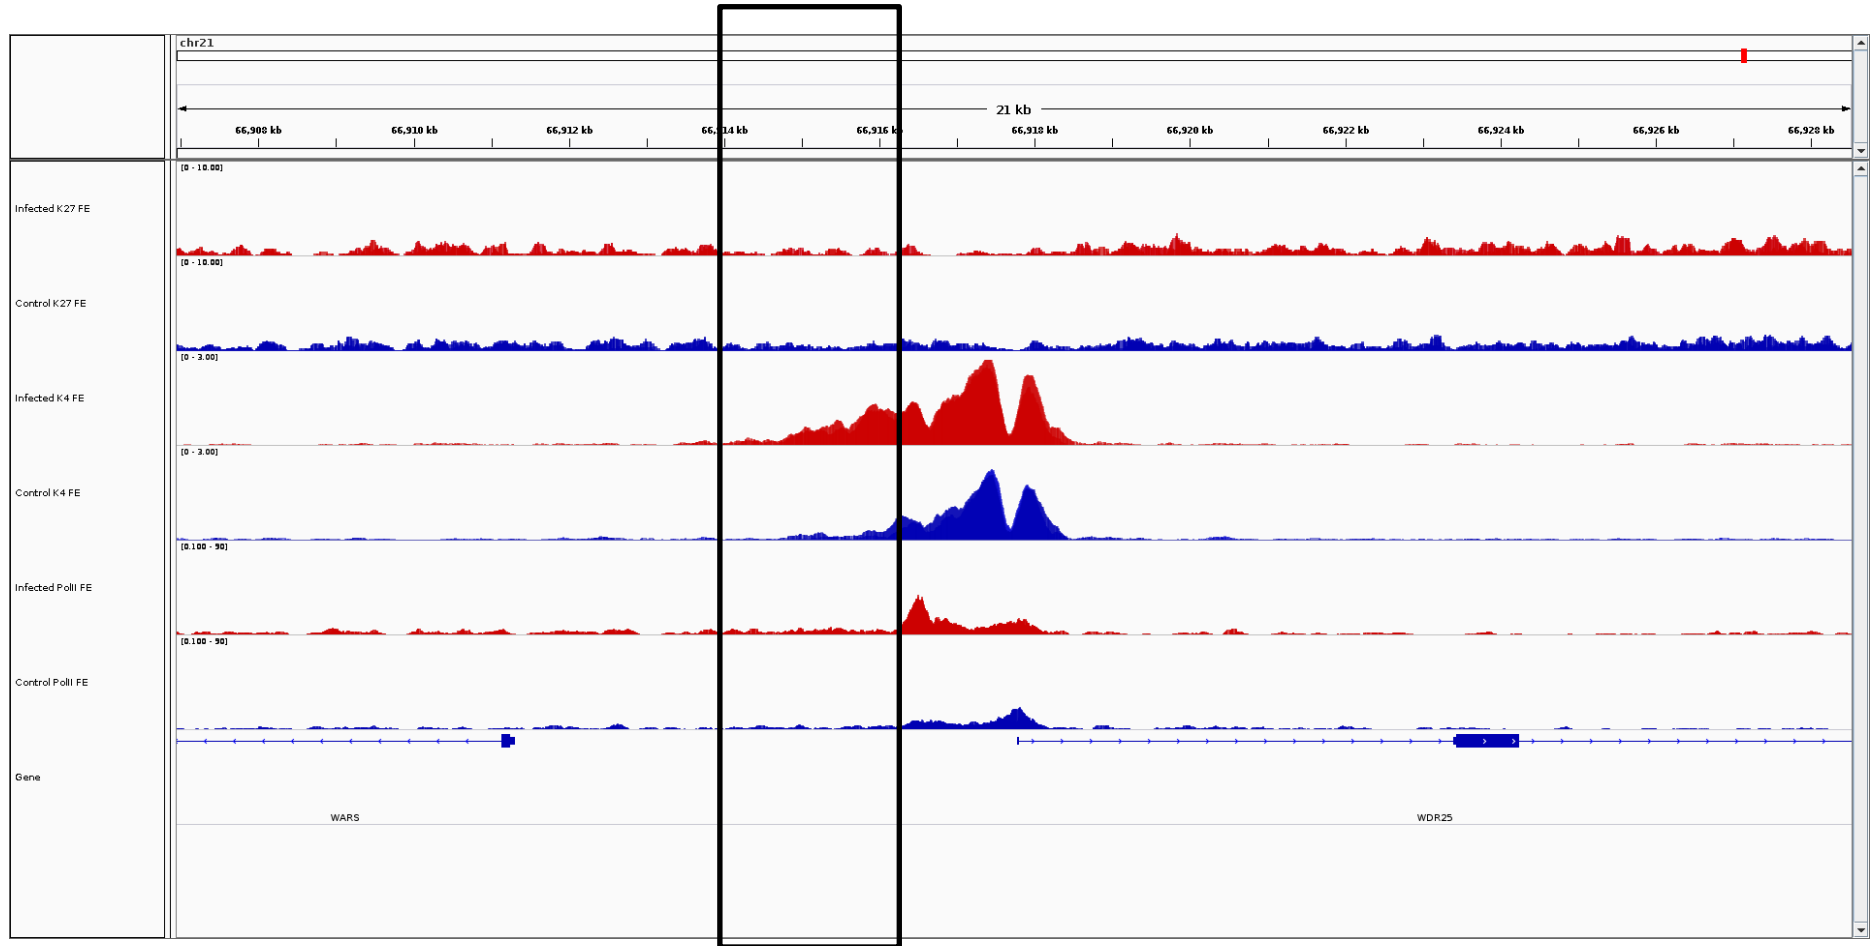

**WDR25**

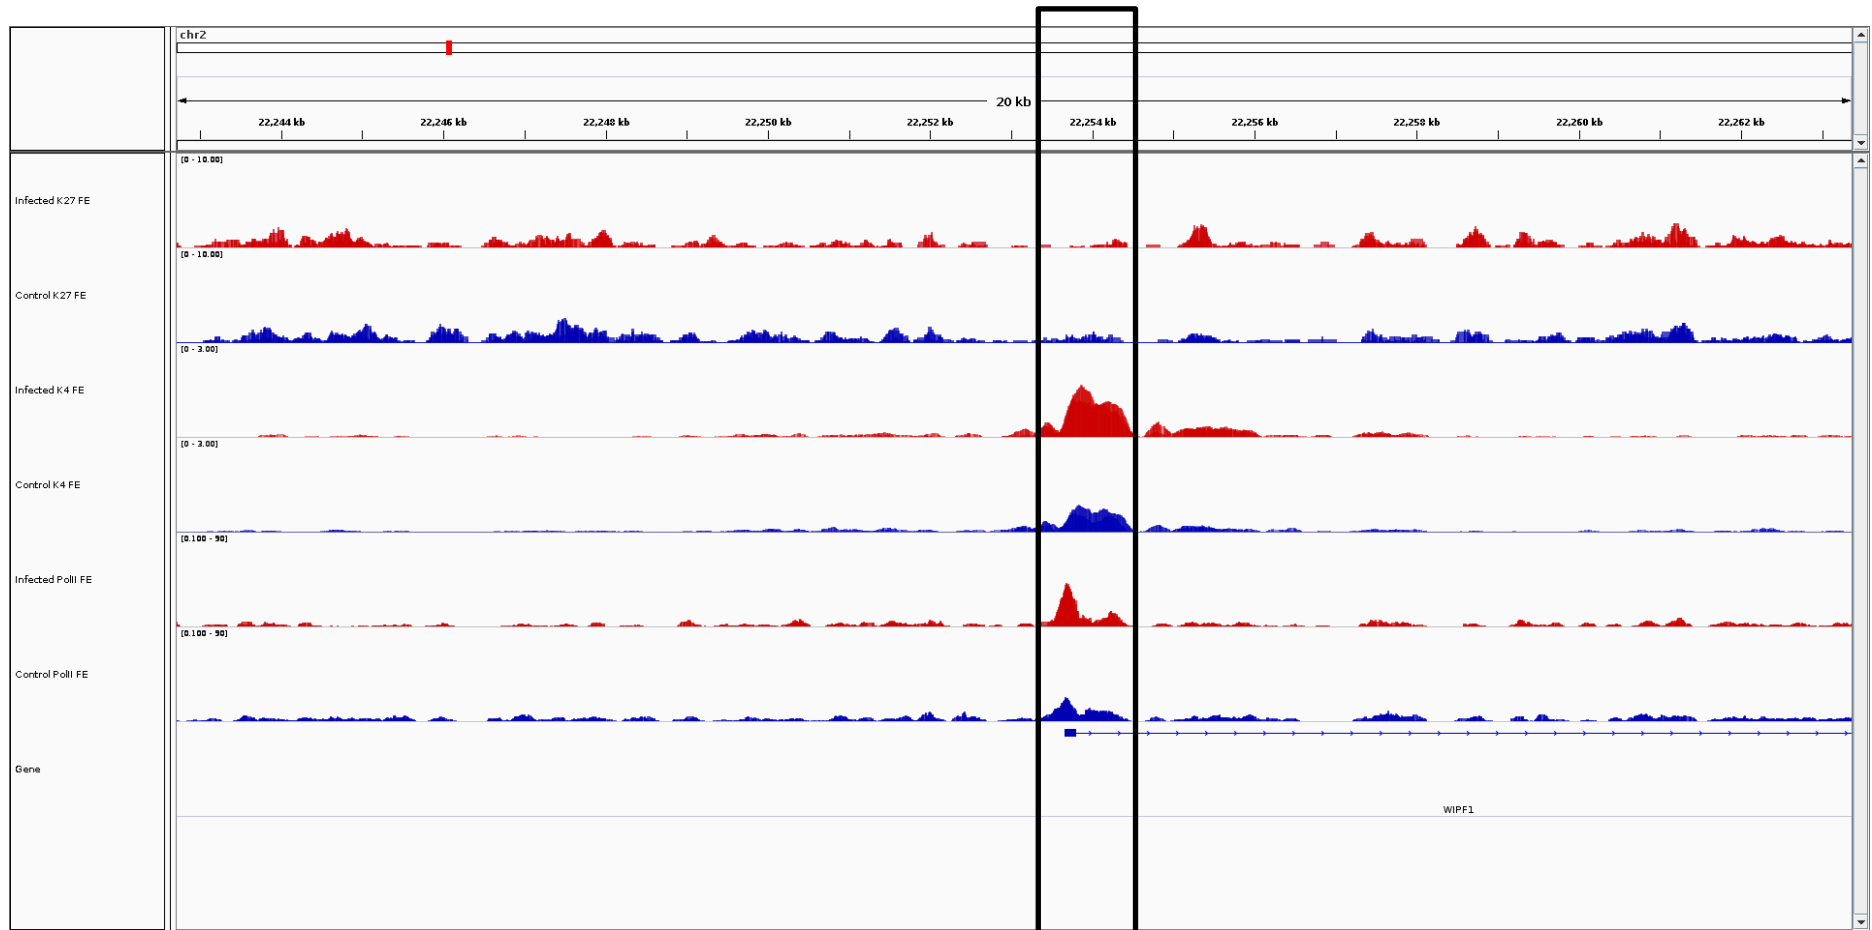

***WIPF1***

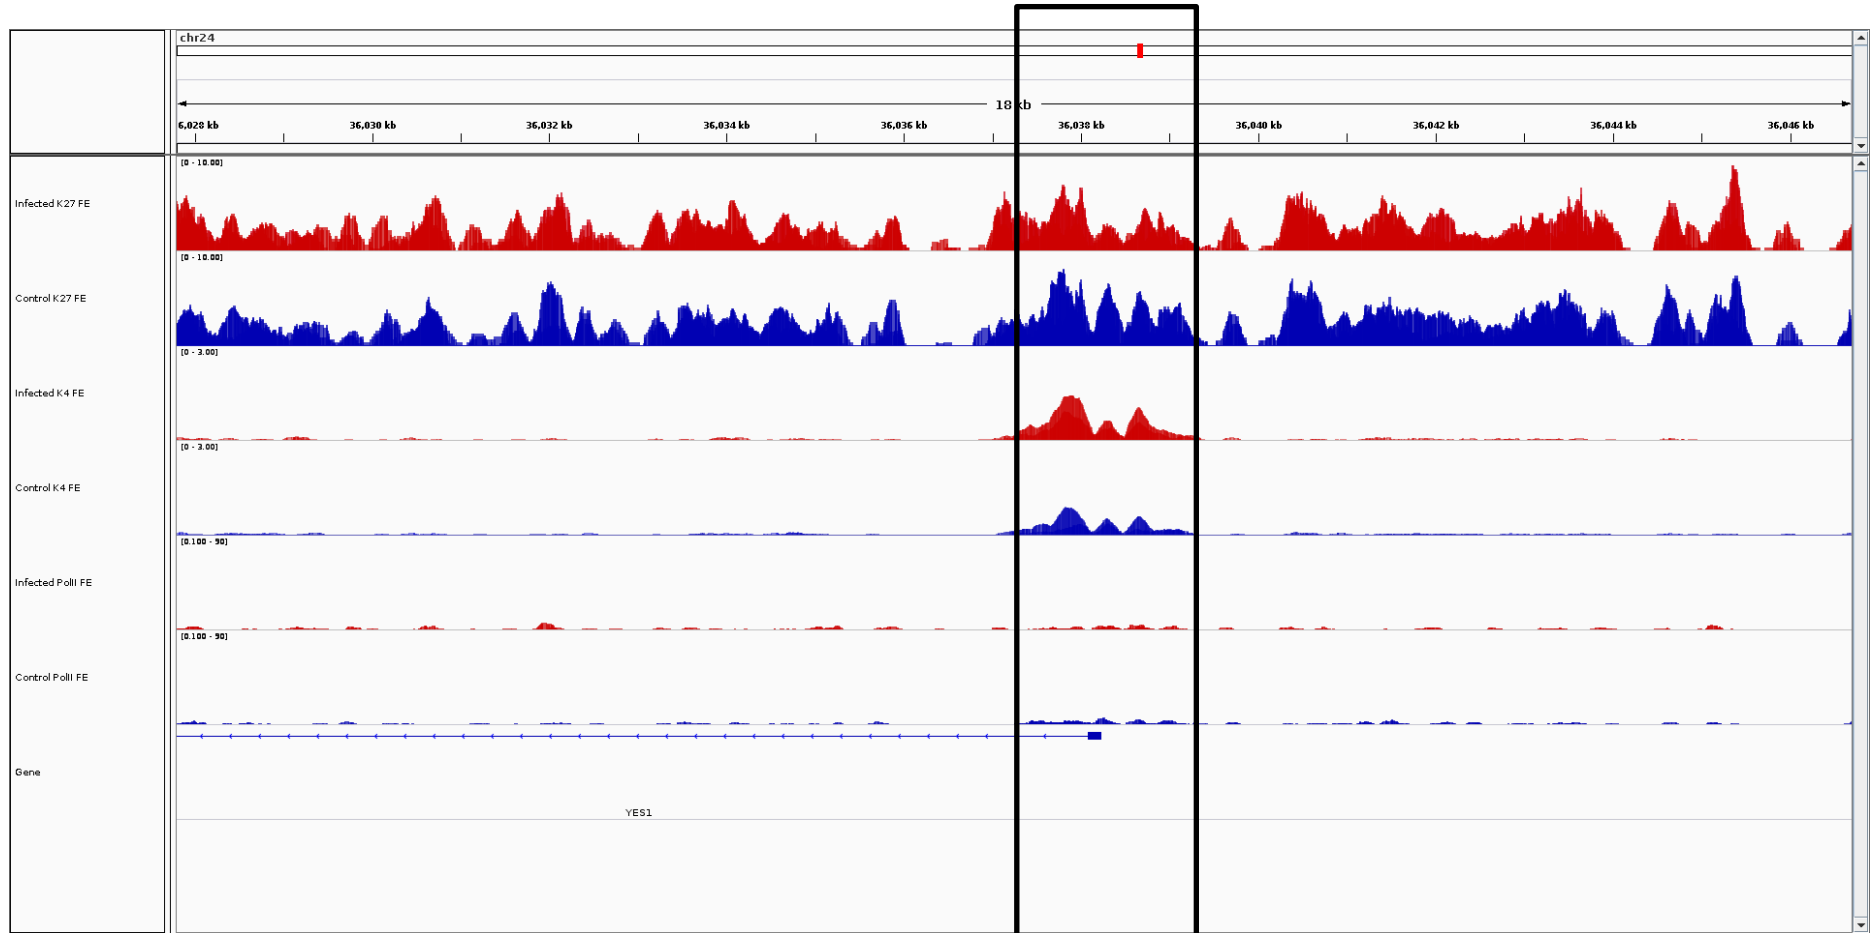

***YES1***

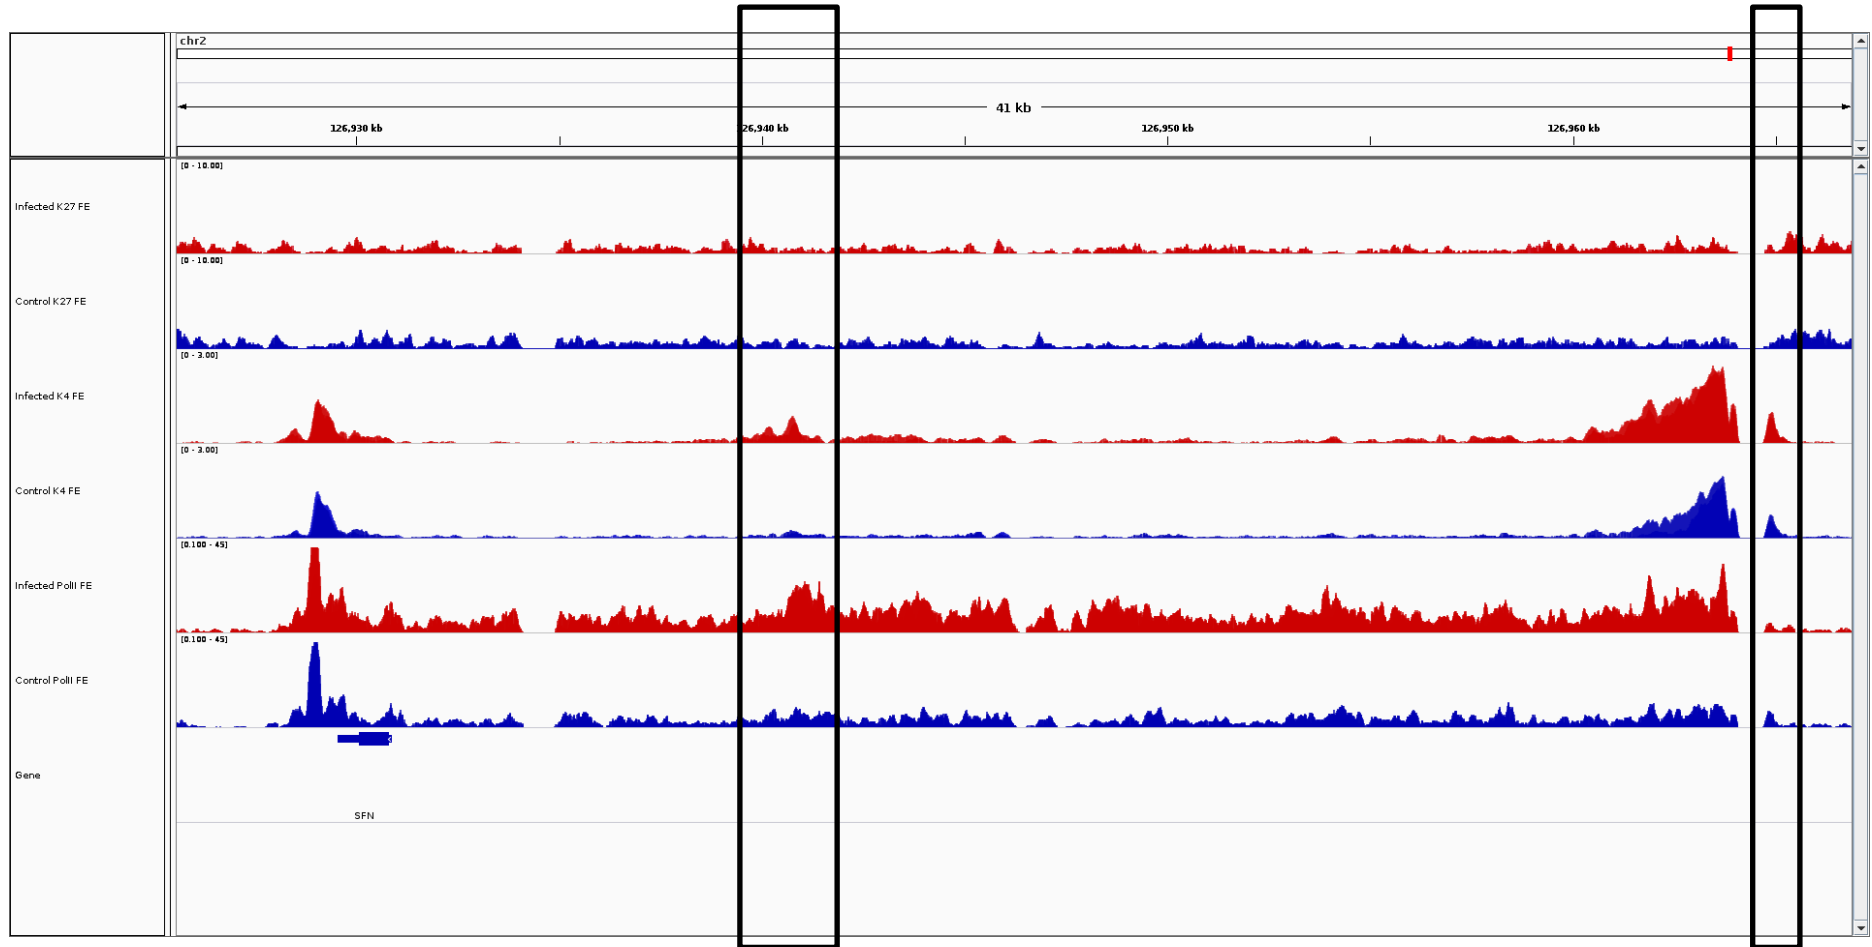

***ZDHHC18-201***

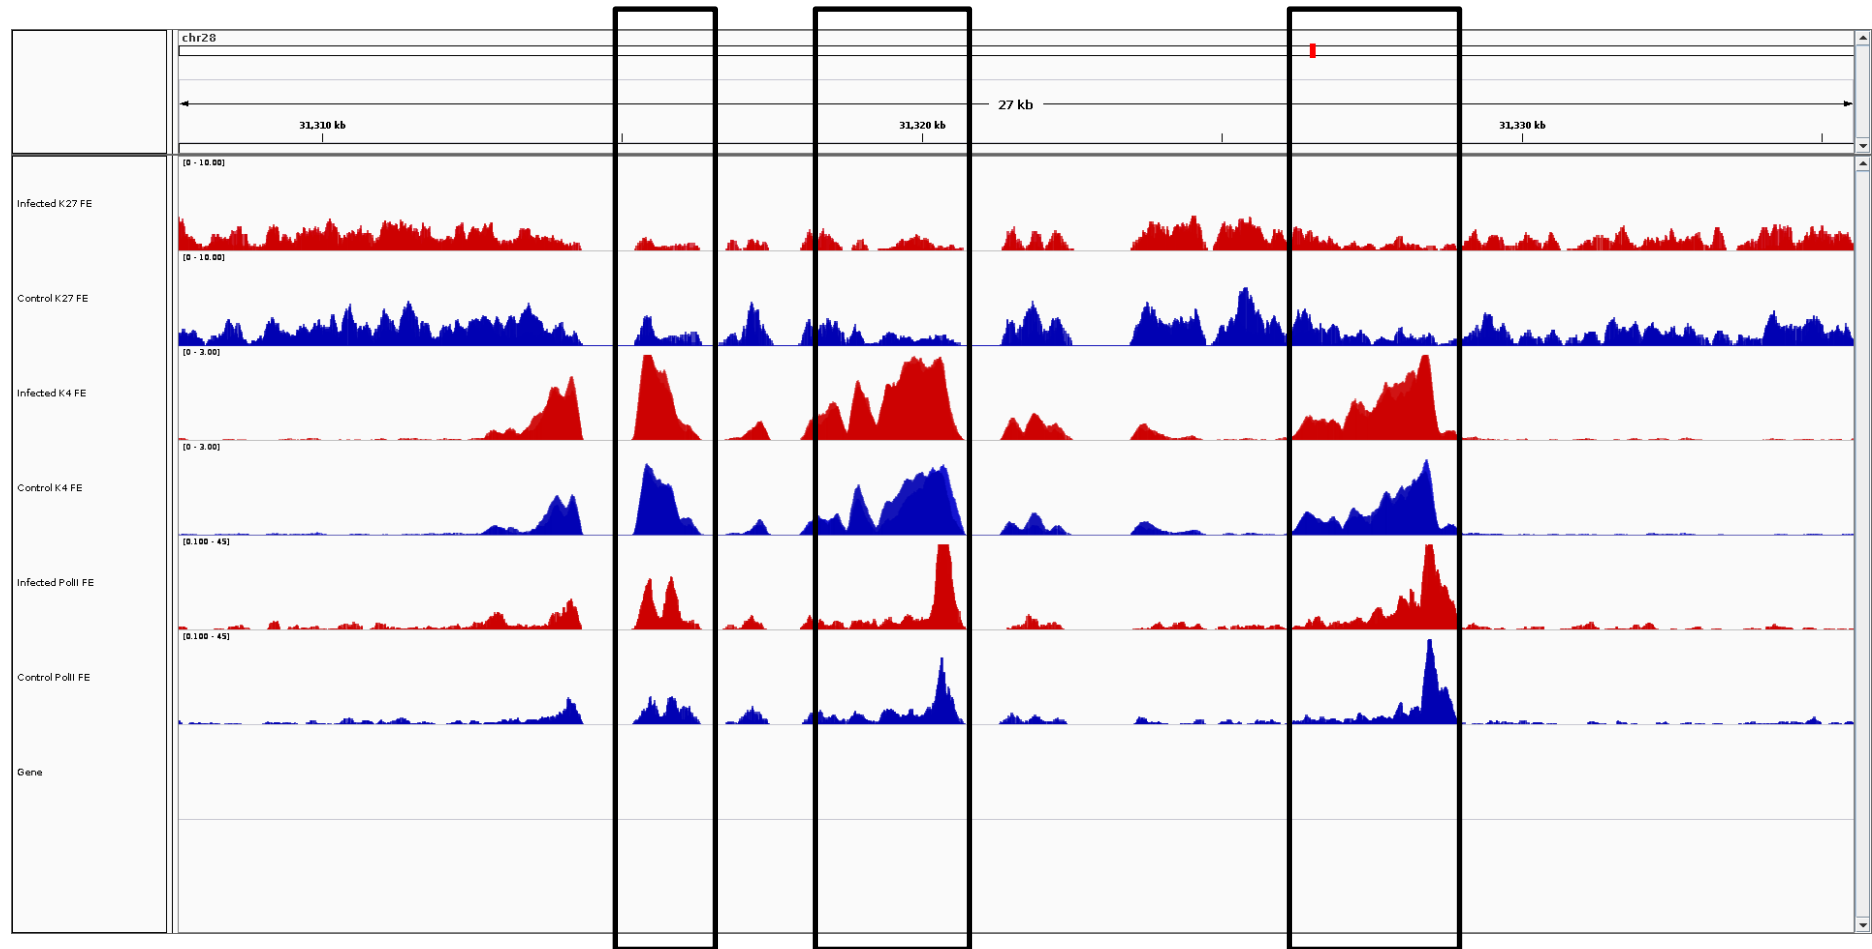

***ZNF503***
